# Supplementary material for: Comprehensive Analysis of the Profiles of Differentially Expressed mRNAs, lncRNAs, and circRNAs in Phosgene-Induced Acute Lung Injury
Source: Biomed Res Int. 2021 Jan 9;2021:6278526. doi: 10.1155/2021/6278526 (PMC7811572; doi:10.1155/2021/6278526)
Supplement: Supplementary 1 — Table S1: differentially expressed mRNAs between the A and B group. [file 6278526.f1.txt]

Table S1 Differentially expressed mRNAs between A and B group
gene_id	BaseMean	BaseMean_control_A	BaseMean_case_B	FoldChange	log2FoldChange	pValue	qValue	Regulation	Expression_A1	Expression_A2	Expression_A3	Expression_B1	Expression_B2	Expression_B3	Dbxref	product	GO_id	GO_term	pathway	pathway_description
Abat	25.27533347	34.14264027	16.40802666	0.480572871	-1.057172886	0.049228758	0.89259888	Down	0.231505	0.172507	0.184946	0.0765794	0.113344	0.090862	GeneID:81632,Genbank:XM_006245760.3,RGD:620948	4-aminobutyrate aminotransferase	GO:0005759,GO:0007568,GO:0007620,GO:0007626,GO:0009449,GO:0009450,GO:0035094,GO:0010039,GO:0035640,GO:0014053,GO:0042135,GO:0021549,GO:0042220,GO:0042493,GO:0042803,GO:1904450,GO:0043005,GO:0045471,GO:0045776,GO:0001666,GO:0003867,GO:0005739,GO:0030170,GO:0031652,GO:0032024,GO:0032144,GO:0045964,GO:0032145,GO:0046872,GO:0033602,GO:0047298,GO:0034386,GO:0048148,GO:0051536,GO:0070474,GO:0090331,GO:…	mitochondrial matrix|aging|copulation|locomotory behavior|gamma-aminobutyric acid biosynthetic process|gamma-aminobutyric acid catabolic process|response to nicotine|response to iron ion|exploration behavior|negative regulation of gamma-aminobutyric acid secretion|neurotransmitter catabolic process|cerebellum development|response to cocaine|response to drug|protein homodimerization activity|posit…	rno00640,rno00650,rno00250,rno00280,rno00410,rno04727	Propanoate metabolism|Butanoate metabolism|Alanine, aspartate and glutamate metabolism|Valine, leucine and isoleucine degradation|beta-Alanine metabolism|GABAergic synapse
Abcg3	271.082581	144.5328789	397.6322831	2.75115452	1.460037171	0.010578001	0.508015287	Up	0.860191	1.43367	1.69012	4.78231	1.92694	3.77375	GeneID:498327,Genbank:NM_001128311.1,RGD:1565568	ATP-binding cassette, subfamily G (WHITE), member 3
Abtb2	240.5549019	124.095316	357.0144878	2.876937658	1.524533959	0.01902864	0.631926287	Up	0.450012	0.714117	0.807028	2.34438	0.732868	2.43964	GeneID:171440,Genbank:NM_134403.2,RGD:620724	ankyrin repeat and BTB domain containing 2	GO:0005737,GO:0005829,GO:0006950,GO:0019005,GO:0022008,GO:0030162,GO:0031625,GO:0043161,GO:0046982,GO:0097237,GO:0005634,GO:0005654	cytoplasm|cytosol|response to stress|SCF ubiquitin ligase complex|neurogenesis|regulation of proteolysis|ubiquitin protein ligase binding|proteasome-mediated ubiquitin-dependent protein catabolic process|protein heterodimerization activity|cellular response to toxic substance|nucleus|nucleoplasm
Acan	33.7345641	45.18965759	22.27947062	0.493021452	-1.020277672	0.031491715	0.758582817	Down	0.137693	0.155753	0.0753189	0.0666249	0.062647	0.0464893	GeneID:58968,Genbank:NM_022190.1,RGD:68358	aggrecan	GO:0005540,GO:0005578,GO:0005604,GO:0005615,GO:0014070,GO:0021510,GO:0030166,GO:0007155,GO:0030199,GO:0030246,GO:0030336,GO:0031012,GO:0001501,GO:0001502,GO:0001503,GO:0002063,GO:0005201,GO:0005509,GO:0007417,GO:0007507,GO:0009314,GO:0009612,GO:0009629,GO:0042493,GO:0009749,GO:0043005,GO:0010259,GO:0043025,GO:0010447,GO:0060591,GO:0071363,GO:0072534	hyaluronic acid binding|proteinaceous extracellular matrix|basement membrane|extracellular space|response to organic cyclic compound|spinal cord development|proteoglycan biosynthetic process|cell adhesion|collagen fibril organization|carbohydrate binding|negative regulation of cell migration|extracellular matrix|skeletal system development|cartilage condensation|ossification|chondrocyte developme…
Actn2	575.6918742	791.2710446	360.1127039	0.455106637	-1.13572347	3.71E-05	0.022400431	Down	5.60535	4.05736	4.97852	1.2518	2.31202	2.77697	GeneID:291245,Genbank:NM_001170325.1,RGD:1308097	actinin alpha 2	GO:0030018,GO:0030035,GO:0030175,GO:0030274,GO:0030374,GO:0030375,GO:0030864,GO:0051695,GO:0031432,GO:0055013,GO:0042391,GO:0070080,GO:0042802,GO:0072659,GO:0086097,GO:1901017,GO:1901018,GO:1903506,GO:2000009,GO:2001137,GO:0005509,GO:0005515,GO:0005546,GO:0005886,GO:0005925,GO:0006936,GO:0008092,GO:0019904,GO:0030017,GO:0042803,GO:0043267,GO:0043268,GO:0044325,GO:0045214,GO:0046983,GO:0048041,GO:…	Z disc|microspike assembly|filopodium|LIM domain binding|ligand-dependent nuclear receptor transcription coactivator activity|thyroid hormone receptor coactivator activity|cortical actin cytoskeleton|actin filament uncapping|titin binding|cardiac muscle cell development|regulation of membrane potential|titin Z domain binding|identical protein binding|protein localization to plasma membrane|phosph…	rno05412	Arrhythmogenic right ventricular cardiomyopathy (ARVC)
Adar	6157.011777	2691.461198	9622.562355	3.575218681	1.838031488	0.000576333	0.135058023	Up	5.51457	5.92934	5.86185	21.6773	11.2424	25.9148	GeneID:81635,Genbank:XM_006232774.3,RGD:71099	adenosine deaminase, RNA-specific	GO:0003677,GO:0003723,GO:0003726,GO:0005634,GO:0005654,GO:0008150,GO:0005730,GO:0009615,GO:0016553,GO:0016607,GO:0030218,GO:0044530,GO:0031054,GO:0035196,GO:0045070,GO:0045071,GO:0001649,GO:1900369,GO:0045087,GO:0001701,GO:0046872,GO:0002244,GO:0002566,GO:0003674,GO:0005737,GO:0006351,GO:0006355,GO:0006382,GO:0035280,GO:0006397,GO:0006606,GO:0035455,GO:0006611,GO:0043066,GO:0051607,GO:0044387,GO:…	DNA binding|RNA binding|double-stranded RNA adenosine deaminase activity|nucleus|nucleoplasm|biological_process|nucleolus|response to virus|base conversion or substitution editing|nuclear speck|erythrocyte differentiation|supraspliceosomal complex|pre-miRNA processing|production of miRNAs involved in gene silencing by miRNA|positive regulation of viral genome replication|negative regulation of vi…	rno04623,rno05162,rno05164	Cytosolic DNA-sensing pathway|Measles|Influenza A
Aida	2567.025708	1234.01623	3900.035187	3.160440757	1.660125771	0.032773089	0.77701261	Up	9.68776	9.77544	10.7011	33.6553	11.6021	45.8344	GeneID:682999,Genbank:NM_001127600.1,RGD:1592746	axin interactor, dorsalization associated	GO:0030178,GO:0035091,GO:0035556,GO:0043496,GO:0043508,GO:0046329,GO:0048264,GO:0005737,GO:0016020,GO:0019904	negative regulation of Wnt signaling pathway|phosphatidylinositol binding|intracellular signal transduction|regulation of protein homodimerization activity|negative regulation of JUN kinase activity|negative regulation of JNK cascade|determination of ventral identity|cytoplasm|membrane|protein domain specific binding
Ano2	128.2770074	71.72396368	184.8300512	2.576963705	1.365672218	0.007783903	0.448097911	Up	0.256549	0.361076	0.172197	0.93554	0.34825	0.657106	GeneID:100361584,Genbank:XM_017593040.1,RGD:1591606	anoctamin 2	GO:0005654,GO:0005886,GO:0006821,GO:0016021,GO:0017128,GO:0034220,GO:0042803,GO:0046982,GO:0097730,GO:0005229	nucleoplasm|plasma membrane|chloride transport|integral component of membrane|phospholipid scramblase activity|ion transmembrane transport|protein homodimerization activity|protein heterodimerization activity|non-motile cilium|intracellular calcium activated chloride channel activity	rno04740	Olfactory transduction
Aox2	15.2495672	23.14674493	7.352389466	0.31764248	-1.65452423	0.018758483	0.629839145	Down	0.040609	0.05582	0.0924772	0.0121571	0.0179494	0.0180199	GeneID:316421,Genbank:XM_017596459.1,RGD:1359668	aldehyde oxidase 2	GO:0050660,GO:0005506,GO:0005829,GO:0051287,GO:0009055,GO:0009115,GO:0016614,GO:0016903,GO:0051537,GO:0017144,GO:0022900,GO:0055114,GO:0042803,GO:0102797,GO:0043546,GO:0004031,GO:0102798,GO:0050250,GO:0004854	flavin adenine dinucleotide binding|iron ion binding|cytosol|NAD binding|electron transfer activity|xanthine catabolic process|oxidoreductase activity, acting on CH-OH group of donors|oxidoreductase activity, acting on the aldehyde or oxo group of donors|2 iron, 2 sulfur cluster binding|drug metabolic process|electron transport chain|oxidation-reduction process|protein homodimerization activity|g…	rno00280,rno00350,rno00380,rno00750,rno00760,rno00830,rno00982,rno04630	Valine, leucine and isoleucine degradation|Tyrosine metabolism|Tryptophan metabolism|Vitamin B6 metabolism|Nicotinate and nicotinamide metabolism|Retinol metabolism|Drug metabolism - cytochrome P450|Jak-STAT signaling pathway
Apobec2	25.99977087	38.15116479	13.84837695	0.362987002	-1.462010205	0.006125643	0.399327651	Down	0.856103	0.760462	0.714047	0.100162	0.276729	0.415094	GeneID:301226,Genbank:NM_001106883.1,RGD:1308727	apolipoprotein B mRNA editing enzyme catalytic subunit 2	GO:0005634,GO:0005737,GO:0008270,GO:0009972,GO:0016554,GO:0016556,GO:0042802,GO:0080111,GO:0003723,GO:0004126	nucleus|cytoplasm|zinc ion binding|cytidine deamination|cytidine to uridine editing|mRNA modification|identical protein binding|DNA demethylation|RNA binding|cytidine deaminase activity
Apol11a	3702.780781	2396.012282	5009.549281	2.090786144	1.064045504	0.001119153	0.17955132	Up	14.4188	18.7065	17.2116	42.1311	22.339	34.2213	GeneID:300060,Genbank:XM_006241949.3,RGD:1309798	apolipoprotein L 11a	GO:0008289,GO:0016020,GO:0050896	lipid binding|membrane|response to stimulus
Apol9a	1808.120155	201.4130856	3414.827224	16.9543464	4.083583264	0.000296664	0.092608739	Up	1.26154	1.44358	1.31915	25.4462	6.89036	31.4779	GeneID:503164,Genbank:XM_008765643.2,RGD:1562332	apolipoprotein L 9a	GO:0008289,GO:0016020,GO:0042157,GO:0050896,GO:0005576,GO:0006869	lipid binding|membrane|lipoprotein metabolic process|response to stimulus|extracellular region|lipid transport
Art2b	34.08665575	45.81054379	22.36276771	0.488157657	-1.034580935	0.049118904	0.89259888	Down	0.0779645	0.0842366	0.0637979	0.0199218	0.0829483	0.0147082	GeneID:293152,Genbank:XM_017588955.1,RGD:3521	ADP-ribosyltransferase 2b	GO:0006471,GO:0016798,GO:0018120,GO:0019677,GO:0031362,GO:0046658,GO:0061810,GO:0003956	protein ADP-ribosylation|hydrolase activity, acting on glycosyl bonds|peptidyl-arginine ADP-ribosylation|NAD catabolic process|anchored component of external side of plasma membrane|anchored component of plasma membrane|NAD glycohydrolase activity|NAD(P)+-protein-arginine ADP-ribosyltransferase activity	rno00760	Nicotinate and nicotinamide metabolism
Ascc3	5301.130505	2665.080798	7937.180213	2.978213726	1.57444729	0.024288811	0.689287025	Up	5.80835	6.18285	6.02277	18.5696	7.37685	24.8724	GeneID:309887,Genbank:XM_008772992.2,RGD:1307995	activating signal cointegrator 1 complex subunit 3	GO:0032508,GO:0005634,GO:0005829,GO:0006307,GO:0043140,GO:0006351,GO:0006355,GO:0099053,GO:0008283,GO:0003676,GO:0005524,GO:0005622	DNA duplex unwinding|nucleus|cytosol|DNA dealkylation involved in DNA repair|ATP-dependent 3'-5' DNA helicase activity|transcription, DNA-templated|regulation of transcription, DNA-templated|activating signal cointegrator 1 complex|cell proliferation|nucleic acid binding|ATP binding|intracellular
Atad1	4190.463747	2497.50692	5883.420574	2.355717427	1.236166495	0.03762074	0.810632984	Up	17.206	16.5481	15.5	39.2436	17.6458	52.3316	GeneID:309532,Genbank:XM_017589305.1,RGD:1308570	ATPase family, AAA domain containing 1	GO:0045211,GO:0005524,GO:0005634,GO:0051967,GO:0007612,GO:0007613,GO:0008568,GO:0016887,GO:0002092,GO:0030054,GO:0031122,GO:0005515	postsynaptic membrane|ATP binding|nucleus|negative regulation of synaptic transmission, glutamatergic|learning|memory|microtubule-severing ATPase activity|ATPase activity|positive regulation of receptor internalization|cell junction|cytoplasmic microtubule organization|protein binding
Atp13a5	21.19025476	12.92878878	29.45172074	2.27799535	1.187764802	0.041973538	0.847159884	Up	0.0554091	0.0599199	0.0566782	0.209695	0.0912964	0.0723445	GeneID:303856,Genbank:XM_008768800.2,RGD:1306792	ATPase 13A5	GO:0006874,GO:0019829,GO:0043231,GO:0046872,GO:0070588,GO:0099132,GO:0005388,GO:0005524,GO:0005887	cellular calcium ion homeostasis|cation-transporting ATPase activity|intracellular membrane-bounded organelle|metal ion binding|calcium ion transmembrane transport|ATP hydrolysis coupled cation transmembrane transport|calcium-transporting ATPase activity|ATP binding|integral component of plasma membrane
Atp2b2	19.58224941	27.82585851	11.33864031	0.407485732	-1.295178552	0.035269346	0.794939662	Down	0.0803287	0.0631893	0.0955712	0.0360357	0.0321877	0.0289575	GeneID:24215,Genbank:NM_012508.5,RGD:2176	ATPase plasma membrane Ca2+ transporting 2	GO:0005509,GO:0005516,GO:0005524,GO:0006996,GO:0007420,GO:0005737,GO:0007595,GO:0007605,GO:0007626,GO:0030165,GO:0008022,GO:0008361,GO:0030182,GO:0030425,GO:0000902,GO:0048167,GO:0030899,GO:0003407,GO:0048839,GO:0032809,GO:0005388,GO:0050808,GO:0033130,GO:0050885,GO:0050910,GO:0051480,GO:0051928,GO:0060088,GO:0005783,GO:0005886,GO:0005887,GO:0005929,GO:0016021,GO:0006816,GO:0016324,GO:0006874,GO:…	calcium ion binding|calmodulin binding|ATP binding|organelle organization|brain development|cytoplasm|lactation|sensory perception of sound|locomotory behavior|PDZ domain binding|protein C-terminus binding|regulation of cell size|neuron differentiation|dendrite|cell morphogenesis|regulation of synaptic plasticity|calcium-dependent ATPase activity|neural retina development|inner ear development|ne…	rno04020,rno04024,rno04022,rno04925,rno04261,rno04970,rno04972	Calcium signaling pathway|cAMP signaling pathway|cGMP - PKG signaling pathway|Aldosterone synthesis and secretion|Adrenergic signaling in cardiomyocytes|Salivary secretion|Pancreatic secretion
Batf2	370.499579	28.8748811	712.1242769	24.66241417	4.624242125	0.014395867	0.566940999	Up	0.347289	0.277233	0.272916	5.49454	1.15345	13.6038	GeneID:309178,Genbank:XM_219527.8,RGD:1311481	basic leucine zipper ATF-like transcription factor 2	GO:0003700,GO:0005634,GO:0006357,GO:0042832,GO:0043011,GO:0000978,GO:0000982,GO:0003677	DNA binding transcription factor activity|nucleus|regulation of transcription by RNA polymerase II|defense response to protozoan|myeloid dendritic cell differentiation|RNA polymerase II proximal promoter sequence-specific DNA binding|transcription factor activity, RNA polymerase II proximal promoter sequence-specific DNA binding|DNA binding
Bcl11b	234.2255162	319.2455506	149.2054817	0.467369025	-1.097365973	0.00150173	0.200204257	Down	0.656299	0.661093	1.09682	0.246098	0.434642	0.355695	GeneID:314423,Genbank:NM_001277288.1,RGD:1311128	B-cell CLL/lymphoma 11B	GO:0006355,GO:0006366,GO:0007165,GO:0007275,GO:0007409,GO:0008285,GO:0009791,GO:0043066,GO:0010468,GO:0043368,GO:0010837,GO:0043565,GO:0019216,GO:0043588,GO:0044212,GO:0045664,GO:0045944,GO:0046632,GO:0000978,GO:0001077,GO:0003334,GO:0003382,GO:0003700,GO:0005622,GO:0005634,GO:0021773,GO:0021902,GO:0021953,GO:0022008,GO:0031077,GO:0033077,GO:0033153,GO:0048538,GO:0035701,GO:0071678,GO:0042475,GO:…	regulation of transcription, DNA-templated|transcription by RNA polymerase II|signal transduction|multicellular organism development|axonogenesis|negative regulation of cell proliferation|post-embryonic development|negative regulation of apoptotic process|regulation of gene expression|positive T cell selection|regulation of keratinocyte proliferation|sequence-specific DNA binding|regulation of li…	rno05202	Transcriptional misregulation in cancers
Bst2	3254.561712	1340.235245	5168.888178	3.85670217	1.947367739	0.013183891	0.551192582	Up	38.7991	43.6572	47.6071	178.326	64.3114	235.86	GeneID:378947,Genbank:NM_198134.2,RGD:727849	bone marrow stromal cell antigen 2	GO:0005794,GO:0005829,GO:0005886,GO:0007165,GO:0008191,GO:0030336,GO:0031225,GO:0009615,GO:0032956,GO:0034341,GO:0035455,GO:1901253,GO:0035456,GO:1903901,GO:0042802,GO:0002737,GO:0005515,GO:0005622,GO:0005737,GO:0005771,GO:0009986,GO:0010951,GO:0016021,GO:0016324,GO:0042803,GO:0030308,GO:0045071,GO:0045087,GO:0045121,GO:0051607	Golgi apparatus|cytosol|plasma membrane|signal transduction|metalloendopeptidase inhibitor activity|negative regulation of cell migration|anchored component of membrane|response to virus|regulation of actin cytoskeleton organization|response to interferon-gamma|response to interferon-alpha|negative regulation of intracellular transport of viral material|response to interferon-beta|negative regula…
Btc	15.44867694	7.960975222	22.93637865	2.881101625	1.52662055	0.033925859	0.784483138	Up	0.30993	0.405698	0.308732	0.896412	0.196456	0.734844	GeneID:64022,Genbank:NM_022256.2,RGD:620275	betacellulin	GO:0045597,GO:0005615,GO:0045840,GO:0006260,GO:0048146,GO:0007173,GO:0008083,GO:0008284,GO:0010469,GO:0016021,GO:0030154,GO:0005154,GO:0035810,GO:0043066,GO:0005575	positive regulation of cell differentiation|extracellular space|positive regulation of mitotic nuclear division|DNA replication|positive regulation of fibroblast proliferation|epidermal growth factor receptor signaling pathway|growth factor activity|positive regulation of cell proliferation|regulation of signaling receptor activity|integral component of membrane|cell differentiation|epidermal gro…	rno04012	ErbB signaling pathway
Camk4	190.2268609	258.0213306	122.4323912	0.474504921	-1.075505044	1.66E-05	0.013454988	Down	0.435004	0.390714	0.537591	0.150237	0.269563	0.184353	GeneID:25050,Genbank:NM_012727.3,RGD:2264	calcium/calmodulin-dependent protein kinase IV	GO:0018105,GO:0006468,GO:0002372,GO:0035556,GO:0004683,GO:0043011,GO:0006913,GO:0005516,GO:0005524,GO:0005634,GO:0006954,GO:0045893,GO:0007165,GO:0005654,GO:0007270,GO:0007616,GO:0005737,GO:0001650,GO:0046777,GO:0046827,GO:0009931,GO:0005829,GO:0002250	peptidyl-serine phosphorylation|protein phosphorylation|myeloid dendritic cell cytokine production|intracellular signal transduction|calmodulin-dependent protein kinase activity|myeloid dendritic cell differentiation|nucleocytoplasmic transport|calmodulin binding|ATP binding|nucleus|inflammatory response|positive regulation of transcription, DNA-templated|signal transduction|nucleoplasm|neuron-ne…	rno04371,rno04020,rno04024,rno04921,rno04925,rno04725,rno04720,rno04722,rno04380,rno04211,rno05031,rno05034	Apelin signaling pathway|Calcium signaling pathway|cAMP signaling pathway|Oxytocin signaling pathway|Aldosterone synthesis and secretion|Cholinergic synapse|Long-term potentiation|Neurotrophin signaling pathway|Osteoclast differentiation|Longevity regulating pathway - mammal|Amphetamine addiction|Alcoholism
Capn8	65.05333445	91.72033964	38.38632926	0.418514905	-1.25664909	0.002080288	0.230554968	Down	0.266311	0.41704	0.457228	0.123874	0.106096	0.259955	GeneID:170808,Genbank:XM_017598654.1,RGD:620085	calpain 8	GO:0005737,GO:0005794,GO:0006508,GO:0007586,GO:0051260,GO:1990092,GO:0004198,GO:0005509	cytoplasm|Golgi apparatus|proteolysis|digestion|protein homooligomerization|calcium-dependent self proteolysis|calcium-dependent cysteine-type endopeptidase activity|calcium ion binding
Car14	53.10673845	71.32327039	34.89020651	0.489184053	-1.03155072	0.006848395	0.423334753	Down	0.458234	0.435572	0.56001	0.142615	0.261827	0.288917	GeneID:791259,Genbank:XM_006232989.3,RGD:1599277	carbonic anhydrase 14	GO:0004089,GO:0016021	carbonate dehydratase activity|integral component of membrane	rno00910	Nitrogen metabolism
Carmil2	204.7541021	282.4300706	127.0781335	0.449945479	-1.152177897	8.49E-07	0.001575386	Down	0.929038	0.832752	0.968343	0.311683	0.430086	0.26859	GeneID:307797,Genbank:XM_006255548.3,RGD:1562390	capping protein regulator and myosin 1 linker 2	GO:0050852,GO:0044319,GO:0005737,GO:0051639,GO:0044354,GO:0005886,GO:0061339,GO:0044877,GO:0005911,GO:0090091,GO:0007163,GO:0008290,GO:0010592,GO:0015629,GO:0030011,GO:1900029,GO:0045111,GO:0030027,GO:1900042,GO:0045184,GO:0030335,GO:1902715,GO:0045591,GO:0031252,GO:0001726,GO:1902745,GO:0048538,GO:0032729,GO:0001772,GO:2000813,GO:0048872,GO:0042102,GO:0005543	T cell receptor signaling pathway|wound healing, spreading of cells|cytoplasm|actin filament network formation|macropinosome|plasma membrane|establishment or maintenance of monopolar cell polarity|protein-containing complex binding|cell-cell junction|positive regulation of extracellular matrix disassembly|establishment or maintenance of cell polarity|F-actin capping protein complex|positive regul…
Casp12	882.0278173	415.0234675	1349.032167	3.250496111	1.700659928	0.048572687	0.89018241	Up	5.90628	3.70602	4.33896	14.3376	5.67742	24.157	GeneID:156117,Genbank:NM_130422.1,RGD:621758	caspase 12	GO:0005783,GO:0005829,GO:0006508,GO:0006915,GO:0042981,GO:0006919,GO:0043065,GO:0007568,GO:0043231,GO:0008234,GO:0043280,GO:0045471,GO:0050727,GO:0097194,GO:0070059,GO:0097199,GO:0097200,GO:0071287,GO:0097264,GO:0002020,GO:0004175,GO:0004197,GO:0005515,GO:0005634,GO:0005737,GO:0009409,GO:0010035,GO:0010041,GO:0010243,GO:0016540,GO:0030968,GO:0034059,GO:0072557,GO:0034976,GO:0035094,GO:0072559,GO:…	endoplasmic reticulum|cytosol|proteolysis|apoptotic process|regulation of apoptotic process|activation of cysteine-type endopeptidase activity involved in apoptotic process|positive regulation of apoptotic process|aging|intracellular membrane-bounded organelle|cysteine-type peptidase activity|positive regulation of cysteine-type endopeptidase activity involved in apoptotic process|response to eth…	rno04141,rno04210,rno04621,rno05010,rno05014,rno05020,rno05161	Protein processing in endoplasmic reticulum|Apoptosis|NOD-like receptor signaling pathway|Alzheimer's disease|Amyotrophic lateral sclerosis (ALS)|Prion diseases|Hepatitis B
Casp7	1210.711659	768.6092352	1652.814082	2.150395814	1.104602235	0.013938095	0.562630439	Up	3.3677	2.95098	3.22335	7.82019	3.64073	8.11632	GeneID:64026,Genbank:XM_008760546.2,RGD:620944	caspase 7	GO:0016485,GO:0005737,GO:0043231,GO:0005829,GO:0051402,GO:0006508,GO:0006915,GO:0072734,GO:0097153,GO:0007507,GO:0007568,GO:0097194,GO:0008233,GO:0004190,GO:0097200,GO:0008234,GO:0004197,GO:0009411,GO:0005634	protein processing|cytoplasm|intracellular membrane-bounded organelle|cytosol|neuron apoptotic process|proteolysis|apoptotic process|cellular response to staurosporine|cysteine-type endopeptidase activity involved in apoptotic process|heart development|aging|execution phase of apoptosis|peptidase activity|aspartic-type endopeptidase activity|cysteine-type endopeptidase activity involved in execut…	rno04668,rno04210,rno04215,rno05200,rno05010,rno04932,rno05133,rno05134	TNF signaling pathway|Apoptosis|Apoptosis - multiple species|Pathways in cancer|Alzheimer's disease|Non-alcoholic fatty liver disease (NAFLD)|Pertussis|Legionellosis
Cbs	104.9957666	151.3699052	58.62162806	0.387273996	-1.368573462	0.029164524	0.743091813	Down	1.09174	1.78579	0.776779	0.696563	0.222952	0.329903	GeneID:24250,Genbank:NM_012522.2,RGD:2287	cystathionine beta synthase	GO:0005737,GO:0005829,GO:0006535,GO:0006563,GO:0006565,GO:0006801,GO:0030823,GO:0019343,GO:0031625,GO:0019344,GO:0031667,GO:0019346,GO:0042262,GO:0042802,GO:0042803,GO:0060351,GO:0043066,GO:0070025,GO:0043418,GO:0070026,GO:0070814,GO:0071456,GO:0072341,GO:0001958,GO:0098605,GO:0001974,GO:1904047,GO:0004122,GO:0005634,GO:0019448,GO:0019825,GO:0019899,GO:0020037,GO:0021587,GO:0030170,GO:0043506,GO:…	cytoplasm|cytosol|cysteine biosynthetic process from serine|L-serine metabolic process|L-serine catabolic process|superoxide metabolic process|regulation of cGMP metabolic process|cysteine biosynthetic process via cystathionine|ubiquitin protein ligase binding|cysteine biosynthetic process|response to nutrient levels|transsulfuration|DNA protection|identical protein binding|protein homodimerizati…	rno00260,rno00270	Glycine, serine and threonine metabolism|Cysteine and methionine metabolism
Ccl12	88.37935778	7.948233308	168.8104822	21.23874271	4.408626459	0.043126808	0.854978897	Up	0.564564	0.185218	0.315804	7.12435	0.236815	18.4253	GeneID:287562,Genbank:NM_001105822.1,RGD:1309255	chemokine (C-C motif) ligand 12	GO:0070664,GO:0031727,GO:0007186,GO:0002687,GO:0071346,GO:0043547,GO:0007267,GO:0003674,GO:0071347,GO:0048020,GO:0008009,GO:0004672,GO:0071356,GO:0048245,GO:0005575,GO:0005615,GO:0005623,GO:0006468,GO:0006816,GO:0008360,GO:0006874,GO:0048247,GO:0010469,GO:0006887,GO:0061844,GO:0016004,GO:0006954,GO:0001525,GO:0070098,GO:0030593,GO:0002548,GO:0070374,GO:0031640,GO:0007010	negative regulation of leukocyte proliferation|CCR2 chemokine receptor binding|G-protein coupled receptor signaling pathway|positive regulation of leukocyte migration|cellular response to interferon-gamma|positive regulation of GTPase activity|cell-cell signaling|molecular_function|cellular response to interleukin-1|CCR chemokine receptor binding|chemokine activity|protein kinase activity|cellula…	rno04668,rno04060,rno04621,rno04657,rno04062,rno05323,rno05418,rno04933,rno05164,rno05168,rno05144,rno05142	TNF signaling pathway|Cytokine-cytokine receptor interaction|NOD-like receptor signaling pathway|IL-17 signaling pathway|Chemokine signaling pathway|Rheumatoid arthritis|Fluid shear stress and atherosclerosis|AGE-RAGE signaling pathway in diabetic complications|Influenza A|Herpes simplex infection|Malaria|Chagas disease (American trypanosomiasis)
Ccr4	8.135683485	13.57193475	2.69943222	0.198898114	-2.329898501	0.021181408	0.65792334	Down	0.0500749	0.150411	0.142791	0.0123035	0.0361726	0.0483705	GeneID:171054,Genbank:XM_006243915.3,RGD:620594	C-C motif chemokine receptor 4	GO:0050927,GO:0006935,GO:0070098,GO:0006954,GO:0006955,GO:0007186,GO:0009314,GO:0009617,GO:0009897,GO:0016021,GO:0016493,GO:0043025,GO:0001764,GO:0046677,GO:0002507,GO:0048872,GO:0003674	positive regulation of positive chemotaxis|chemotaxis|chemokine-mediated signaling pathway|inflammatory response|immune response|G-protein coupled receptor signaling pathway|response to radiation|response to bacterium|external side of plasma membrane|integral component of membrane|C-C chemokine receptor activity|neuronal cell body|neuron migration|response to antibiotic|tolerance induction|homeos…	rno04060,rno04062,rno05203,rno05167	Cytokine-cytokine receptor interaction|Chemokine signaling pathway|Viral carcinogenesis|Kaposi's sarcoma-associated herpesvirus infection
Ccr6	133.5370657	178.2909449	88.78318656	0.497968007	-1.005875037	0.01652647	0.604571857	Down	0.713308	0.48946	0.495512	0.144567	0.43192	0.231539	GeneID:308163,Genbank:XM_006227922.3,RGD:1308562	C-C motif chemokine receptor 6	GO:1904155,GO:0060326,GO:0005622,GO:1904156,GO:0060474,GO:0006935,GO:2000319,GO:0070098,GO:0007186,GO:2000404,GO:0007204,GO:0009897,GO:0009986,GO:0010634,GO:0072676,GO:0016021,GO:2000510,GO:0072678,GO:0016493,GO:0072679,GO:0019722,GO:0097225,GO:0019957,GO:0002523,GO:0097228,GO:0036126,GO:0003674,GO:0097524,GO:0048290,GO:0005575	DN2 thymocyte differentiation|cell chemotaxis|intracellular|DN3 thymocyte differentiation|positive regulation of flagellated sperm motility involved in capacitation|chemotaxis|regulation of T-helper 17 cell differentiation|chemokine-mediated signaling pathway|G-protein coupled receptor signaling pathway|regulation of T cell migration|positive regulation of cytosolic calcium ion concentration|exte…	rno04060,rno04062	Cytokine-cytokine receptor interaction|Chemokine signaling pathway
Ccr7	152.925508	210.3130789	95.53793707	0.454265315	-1.13839294	0.012660109	0.544749806	Down	4.01463	6.43483	3.6516	1.53159	3.41813	1.35339	GeneID:287673,Genbank:NM_199489.4,RGD:735151	C-C motif chemokine receptor 7	GO:2000522,GO:0045060,GO:0032496,GO:0002922,GO:2000525,GO:0048872,GO:0032649,GO:0005622,GO:2000526,GO:0050706,GO:0032735,GO:0005739,GO:0050862,GO:0005886,GO:0006935,GO:0006954,GO:0035757,GO:0006955,GO:0071345,GO:0035758,GO:0007186,GO:0072610,GO:0038115,GO:0009897,GO:0090023,GO:0038116,GO:0009986,GO:0002408,GO:0097029,GO:0038117,GO:0016021,GO:0002606,GO:2000510,GO:0038121,GO:0016493,GO:0002885	positive regulation of immunological synapse formation|negative thymic T cell selection|response to lipopolysaccharide|positive regulation of humoral immune response|positive regulation of T cell costimulation|homeostasis of number of cells|regulation of interferon-gamma production|intracellular|positive regulation of glycoprotein biosynthetic process involved in immunological synapse formation|r…	rno04060,rno04062	Cytokine-cytokine receptor interaction|Chemokine signaling pathway
Cd209e	10.62045034	16.2155251	5.025375588	0.309911369	-1.690072413	0.046687596	0.884142717	Down	0.0852192	0.15034	0.155237	0	0.0985216	0.0179948	GeneID:501797,Genbank:XM_006248775.3,RGD:1563333	CD209e molecule	GO:0005537,GO:0016021	mannose binding|integral component of membrane	rno04145,rno04625,rno05152,rno05162	Phagosome|C-type lectin receptor signaling pathway|Tuberculosis|Measles
Cd27	91.81199973	125.4449787	58.17902076	0.463781184	-1.108483805	0.011977517	0.535415034	Down	0.468933	0.348152	0.639258	0.0839853	0.369131	0.22791	GeneID:500318,Genbank:NM_001024335.1,RGD:1560499	CD27 molecule	GO:0043154,GO:0006954,GO:0043410,GO:0006955,GO:0045471,GO:0007275,GO:0009897,GO:0009986,GO:0016020,GO:0032496,GO:0045579,GO:0033209,GO:0045582,GO:0046330,GO:0042127,GO:0070233,GO:0042981,GO:0003674,GO:0097190,GO:0043027,GO:0005031,GO:0097191,GO:0043066,GO:0005887	negative regulation of cysteine-type endopeptidase activity involved in apoptotic process|inflammatory response|positive regulation of MAPK cascade|immune response|response to ethanol|multicellular organism development|external side of plasma membrane|cell surface|membrane|response to lipopolysaccharide|positive regulation of B cell differentiation|tumor necrosis factor-mediated signaling pathway…	rno04060	Cytokine-cytokine receptor interaction
Cd300lg	837.7451974	533.1749192	1142.315476	2.14247789	1.099280316	0.004244859	0.328538066	Up	1.13928	1.43083	3.46249	5.03459	3.44257	3.47272	GeneID:684984,Genbank:XM_003750936.4,RGD:1584376	Cd300 molecule-like family member G	GO:0016323,GO:0016324,GO:0001791,GO:0002414,GO:0016021	basolateral plasma membrane|apical plasma membrane|IgM binding|immunoglobulin transcytosis in epithelial cells|integral component of membrane
Cd3d	68.58578673	101.2120187	35.95955473	0.355289374	-1.492933556	0.00035897	0.100350904	Down	2.89163	3.41155	4.87881	1.22678	1.71013	0.754212	GeneID:25710,Genbank:NM_013169.1,RGD:2304	CD3d molecule	GO:0051260,GO:0004888,GO:0005575,GO:0007166,GO:0008150,GO:0016021,GO:0030217,GO:0042101,GO:0042105,GO:0042803,GO:0045059,GO:0002250,GO:0045944,GO:0003674,GO:0046982,GO:0003713	protein homooligomerization|transmembrane signaling receptor activity|cellular_component|cell surface receptor signaling pathway|biological_process|integral component of membrane|T cell differentiation|T cell receptor complex|alpha-beta T cell receptor complex|protein homodimerization activity|positive thymic T cell selection|adaptive immune response|positive regulation of transcription by RNA po…	rno04640,rno04660,rno04658,rno04659,rno05340,rno05166,rno05162,rno05142	Hematopoietic cell lineage|T cell receptor signaling pathway|Th1 and Th2 cell differentiation|Th17 cell differentiation|Primary immunodeficiency|HTLV-I infection|Measles|Chagas disease (American trypanosomiasis)
Cd3e	117.9103565	176.8727765	58.94793648	0.333278742	-1.585198795	0.000728642	0.148341934	Down	1.32448	1.74736	2.84304	0.301079	0.863252	0.400735	GeneID:315609,Genbank:XM_008766161.2,RGD:1309222	CD3e molecule	GO:0007584,GO:0009897,GO:0010628,GO:0010629,GO:0016021,GO:0016358,GO:0017124,GO:0045086,GO:0021549,GO:0045879,GO:0031295,GO:0046641,GO:0032729,GO:0046649,GO:0046982,GO:0050731,GO:0050850,GO:0050852,GO:0050870,GO:0051260,GO:0001772,GO:0002669,GO:0003674,GO:0004871,GO:0004888,GO:0005575,GO:0005886,GO:0005911,GO:0007166,GO:0032753,GO:0033077,GO:0042101,GO:0042102,GO:0042105,GO:0042803,GO:0097190,GO:…	response to nutrient|external side of plasma membrane|positive regulation of gene expression|negative regulation of gene expression|integral component of membrane|dendrite development|SH3 domain binding|positive regulation of interleukin-2 biosynthetic process|cerebellum development|negative regulation of smoothened signaling pathway|T cell costimulation|positive regulation of alpha-beta T cell p…	rno04640,rno04660,rno04658,rno04659,rno05340,rno05166,rno05162,rno05142	Hematopoietic cell lineage|T cell receptor signaling pathway|Th1 and Th2 cell differentiation|Th17 cell differentiation|Primary immunodeficiency|HTLV-I infection|Measles|Chagas disease (American trypanosomiasis)
Cd3g	107.2804386	149.4928253	65.06805196	0.435258695	-1.200054978	0.007382298	0.442168864	Down	2.87625	3.94503	5.09039	1.29998	2.61692	0.911179	GeneID:300678,Genbank:XM_006242932.3,RGD:1307718	CD3g molecule	GO:0051260,GO:0016021,GO:0004888,GO:0070228,GO:0042105,GO:0005575,GO:0007163,GO:0007166,GO:0042803,GO:0046982,GO:0008150,GO:0015031,GO:0002250,GO:0003674	protein homooligomerization|integral component of membrane|transmembrane signaling receptor activity|regulation of lymphocyte apoptotic process|alpha-beta T cell receptor complex|cellular_component|establishment or maintenance of cell polarity|cell surface receptor signaling pathway|protein homodimerization activity|protein heterodimerization activity|biological_process|protein transport|adaptive…	rno04640,rno04660,rno04658,rno04659,rno05166,rno05162,rno05142	Hematopoietic cell lineage|T cell receptor signaling pathway|Th1 and Th2 cell differentiation|Th17 cell differentiation|HTLV-I infection|Measles|Chagas disease (American trypanosomiasis)
Cd40lg	21.11027214	30.86070146	11.35984281	0.368100603	-1.441827983	0.015482255	0.585823524	Down	0.725577	0.412605	0.361226	0.152518	0.242226	0.152741	GeneID:84349,Genbank:NM_053353.1,RGD:708418	CD40 ligand	GO:0005622,GO:0006954,GO:0007257,GO:0032729,GO:0009897,GO:0032733,GO:0009986,GO:0032735,GO:0044297,GO:0032753,GO:0045190,GO:0045348,GO:0048305,GO:0051023,GO:0002839,GO:0005125,GO:0051092,GO:0005164,GO:0005174,GO:0005615,GO:0010469,GO:0010628,GO:0016021,GO:0030168,GO:0033590,GO:0030183,GO:0042100,GO:0030890,GO:0042102,GO:0042995,GO:0071356,GO:0043066,GO:0097028,GO:1901652,GO:2000353,GO:2001200	intracellular|inflammatory response|activation of JUN kinase activity|positive regulation of interferon-gamma production|external side of plasma membrane|positive regulation of interleukin-10 production|cell surface|positive regulation of interleukin-12 production|cell body|positive regulation of interleukin-4 production|isotype switching|positive regulation of MHC class II biosynthetic process|i…	rno04064,rno04060,rno04514,rno04660,rno04672,rno05310,rno05322,rno05320,rno05330,rno05340,rno05416,rno05144,rno05145	NF-kappa B signaling pathway|Cytokine-cytokine receptor interaction|Cell adhesion molecules (CAMs)|T cell receptor signaling pathway|Intestinal immune network for IgA production|Asthma|Systemic lupus erythematosus|Autoimmune thyroid disease|Allograft rejection|Primary immunodeficiency|Viral myocarditis|Malaria|Toxoplasmosis
Cd5	69.23941196	106.4154504	32.06337356	0.301303743	-1.730709497	8.75E-07	0.001575386	Down	0.916098	1.01554	1.02728	0.16698	0.4813	0.142971	GeneID:54236,Genbank:NM_019295.1,RGD:2309	Cd5 molecule	GO:0005886,GO:0006898,GO:0009897,GO:0009966,GO:0016021,GO:0031295,GO:0044214,GO:0097190,GO:0005044,GO:0005515	plasma membrane|receptor-mediated endocytosis|external side of plasma membrane|regulation of signal transduction|integral component of membrane|T cell costimulation|spanning component of plasma membrane|apoptotic signaling pathway|scavenger receptor activity|protein binding	rno04640	Hematopoietic cell lineage
Cd6	78.03368381	109.8789705	46.1883971	0.420357025	-1.250312913	0.002703237	0.263706374	Down	0.411126	0.303955	0.697299	0.119638	0.326756	0.124014	GeneID:25752,Genbank:XM_017588836.1,RGD:2312	Cd6 molecule	GO:1900017,GO:0032496,GO:0001772,GO:0001934,GO:0042101,GO:0002438,GO:0005044,GO:0005515,GO:0006898,GO:0006952,GO:0006954,GO:0042102,GO:0007157,GO:0019901,GO:0042802,GO:0031226,GO:0001530,GO:0044214,GO:0031663,GO:0070891,GO:0001771	positive regulation of cytokine production involved in inflammatory response|response to lipopolysaccharide|immunological synapse|positive regulation of protein phosphorylation|T cell receptor complex|acute inflammatory response to antigenic stimulus|scavenger receptor activity|protein binding|receptor-mediated endocytosis|defense response|inflammatory response|positive regulation of T cell proli…	rno04514	Cell adhesion molecules (CAMs)
Cd79b	256.1777993	349.2465526	163.109046	0.467031227	-1.098409079	0.000138439	0.05582871	Down	5.03615	6.73328	6.0702	1.96613	4.05411	2.04883	GeneID:171055,Genbank:NM_133533.2,RGD:620012	CD79b molecule	GO:0019815,GO:0005654,GO:0030183,GO:0005737,GO:0042802,GO:0005794,GO:0005829,GO:0005886,GO:0042803,GO:0005887,GO:0050853,GO:0008150,GO:0009897,GO:0051260,GO:0003674,GO:0016021,GO:0004888	B cell receptor complex|nucleoplasm|B cell differentiation|cytoplasm|identical protein binding|Golgi apparatus|cytosol|plasma membrane|protein homodimerization activity|integral component of plasma membrane|B cell receptor signaling pathway|biological_process|external side of plasma membrane|protein homooligomerization|molecular_function|integral component of membrane|transmembrane signaling rece…	rno04662	B cell receptor signaling pathway
Cd8a	188.3017851	255.6606101	120.94296	0.473060594	-1.079903107	0.012275109	0.540154315	Down	1.61069	1.33759	2.76458	0.559059	1.05303	0.830223	GeneID:24930,Genbank:XM_008762976.2,RGD:2316	CD8a molecule	GO:0051607,GO:0007166,GO:0009897,GO:0009986,GO:0016021,GO:0019901,GO:0042110,GO:0042803,GO:0044853,GO:0045065,GO:0002456,GO:0050850,GO:0006954	defense response to virus|cell surface receptor signaling pathway|external side of plasma membrane|cell surface|integral component of membrane|protein kinase binding|T cell activation|protein homodimerization activity|plasma membrane raft|cytotoxic T cell differentiation|T cell mediated immunity|positive regulation of calcium-mediated signaling|inflammatory response	rno04514,rno04640,rno04612,rno04660,rno05340	Cell adhesion molecules (CAMs)|Hematopoietic cell lineage|Antigen processing and presentation|T cell receptor signaling pathway|Primary immunodeficiency
Cd8b	39.61254481	68.89350266	10.33158695	0.149964606	-2.737306057	0.022088215	0.668653659	Down	0.578818	0.658973	2.09803	0.161969	0.211493	0.123379	GeneID:24931,Genbank:NM_031539.1,RGD:2317	CD8b molecule	GO:0016021,GO:0002250,GO:0009897,GO:0009986	integral component of membrane|adaptive immune response|external side of plasma membrane|cell surface	rno04514,rno04640,rno04612,rno04660,rno05340	Cell adhesion molecules (CAMs)|Hematopoietic cell lineage|Antigen processing and presentation|T cell receptor signaling pathway|Primary immunodeficiency
Ckm	246.5709168	345.4095199	147.7323138	0.427701917	-1.225322422	0.001187177	0.182409787	Down	6.39554	4.57989	5.04235	1.20546	1.63525	3.5842	GeneID:24265,Genbank:XM_017588776.1,RGD:2358	creatine kinase, M-type	GO:0004111,GO:0005524,GO:0005615,GO:0005737,GO:0009408,GO:0016310,GO:0046314	creatine kinase activity|ATP binding|extracellular space|cytoplasm|response to heat|phosphorylation|phosphocreatine biosynthetic process	rno00330	Arginine and proline metabolism
Clcn4	78.41906406	111.2485479	45.58958024	0.409799329	-1.287010474	8.23E-05	0.04058584	Down	0.300322	0.370694	0.435864	0.104171	0.145522	0.166205	GeneID:60586,Genbank:XM_006256828.3,RGD:708381	chloride voltage-gated channel 4	GO:1902476,GO:0005524,GO:0005789,GO:0005887,GO:0006821,GO:0015297,GO:0016021,GO:0005247,GO:0031901,GO:0031902,GO:0005254	chloride transmembrane transport|ATP binding|endoplasmic reticulum membrane|integral component of plasma membrane|chloride transport|antiporter activity|integral component of membrane|voltage-gated chloride channel activity|early endosome membrane|late endosome membrane|chloride channel activity
Cldn19	94.57773126	56.0689936	133.0864689	2.37361972	1.247088818	0.035425862	0.796550284	Up	0.415148	0.171443	0.330635	0.525177	0.510818	1.01148	GeneID:298487,Genbank:XM_006238756.3,RGD:1305000	claudin 19	GO:0005923,GO:0016021,GO:0016323,GO:0019227,GO:0030054,GO:0043296,GO:0043297,GO:0005198,GO:0005634,GO:0005737	bicellular tight junction|integral component of membrane|basolateral plasma membrane|neuronal action potential propagation|cell junction|apical junction complex|apical junction assembly|structural molecule activity|nucleus|cytoplasm	rno04514,rno04530,rno04670,rno05160	Cell adhesion molecules (CAMs)|Tight junction|Leukocyte transendothelial migration|Hepatitis C
Clec18a	202.5744585	111.907013	293.241904	2.620406855	1.389790828	0.00289139	0.270778685	Up	0.337136	0.233444	0.817512	1.28373	0.831488	1.41866	GeneID:307851,Genbank:XM_017601442.1,RGD:1559899	C-type lectin domain family 18, member A	GO:0030247,GO:0005615	polysaccharide binding|extracellular space
Clec2dl1	29.66899737	39.90105777	19.43693698	0.487128364	-1.037626107	0.039985983	0.825730388	Down	0.27322	0.343338	0.159617	0.092144	0.132317	0.160923	GeneID:689790,Genbank:XM_006237453.3,RGD:1588698	C-type lectin domain family 2 member D-like 1	GO:0005886,GO:0016021,GO:0030246	plasma membrane|integral component of membrane|carbohydrate binding
Clstn3	23.20863622	31.72852919	14.68874325	0.462950651	-1.11106968	0.047607644	0.884665314	Down	0.0865635	0.084673	0.142325	0.0606624	0.0447722	0.0895207	GeneID:171393,Genbank:NM_134376.1,RGD:621153	calsyntenin 3	GO:0051932,GO:0035249,GO:0005509,GO:0005789,GO:0051965,GO:0045211,GO:0007156,GO:0007268,GO:0007416,GO:0009986,GO:1902474,GO:0014069,GO:0050806,GO:0000139,GO:0016021,GO:0001558,GO:0032991	synaptic transmission, GABAergic|synaptic transmission, glutamatergic|calcium ion binding|endoplasmic reticulum membrane|positive regulation of synapse assembly|postsynaptic membrane|homophilic cell adhesion via plasma membrane adhesion molecules|chemical synaptic transmission|synapse assembly|cell surface|positive regulation of protein localization to synapse|postsynaptic density|positive regula…
Cmah	324.034569	450.7838142	197.2853238	0.437649529	-1.192152079	0.001708403	0.214387605	Down	1.15081	0.85795	0.817828	0.246773	0.722233	0.315197	GeneID:361245,Genbank:XM_017600607.1,RGD:1311930	cytidine monophospho-N-acetylneuraminic acid hydroxylase	GO:0005856,GO:0016020,GO:0016787,GO:0030111,GO:0030338,GO:0043227,GO:0046381,GO:0051537,GO:0055114,GO:0070290,GO:0070291,GO:0005634,GO:0070292,GO:0005737	cytoskeleton|membrane|hydrolase activity|regulation of Wnt signaling pathway|CMP-N-acetylneuraminate monooxygenase activity|membrane-bounded organelle|CMP-N-acetylneuraminate metabolic process|2 iron, 2 sulfur cluster binding|oxidation-reduction process|N-acylphosphatidylethanolamine-specific phospholipase D activity|N-acylethanolamine metabolic process|nucleus|N-acylphosphatidylethanolamine meta…	rno00520	Amino sugar and nucleotide sugar metabolism
Cmpk2	6691.687129	555.1931753	12828.18108	23.1057975	4.53018298	0.002431982	0.250280371	Up	3.71122	4.05553	4.12474	96.9363	16.3483	145.716	GeneID:314004,Genbank:XM_006239938.2,RGD:1305881	cytidine/uridine monophosphate kinase 2	GO:0071222,GO:0004798,GO:0005737,GO:0005739,GO:0006165,GO:0006227,GO:0006233,GO:0006235,GO:0009041,GO:0004127,GO:0009142,GO:0004550,GO:0033862	cellular response to lipopolysaccharide|thymidylate kinase activity|cytoplasm|mitochondrion|nucleoside diphosphate phosphorylation|dUDP biosynthetic process|dTDP biosynthetic process|dTTP biosynthetic process|uridylate kinase activity|cytidylate kinase activity|nucleoside triphosphate biosynthetic process|nucleoside diphosphate kinase activity|UMP kinase activity	rno00240	Pyrimidine metabolism
Cmtr1	3211.526651	1729.013368	4694.039935	2.714866191	1.440881093	0.011447736	0.530077872	Up	8.83415	9.11748	9.28099	25.3797	12.0447	32.193	GeneID:309656,Genbank:XM_008772816.2,RGD:1307801	cap methyltransferase 1	GO:0006370,GO:0004483,GO:0080009,GO:0005634,GO:0005654,GO:0097309,GO:0005737,GO:0005829,GO:0003676	7-methylguanosine mRNA capping|mRNA (nucleoside-2'-O-)-methyltransferase activity|mRNA methylation|nucleus|nucleoplasm|cap1 mRNA methylation|cytoplasm|cytosol|nucleic acid binding
Cnp	1658.370289	919.5983316	2397.142247	2.606727485	1.382239767	0.017058663	0.605130223	Up	8.55786	7.49396	7.80405	22.2764	9.79219	27.3578	GeneID:25275,Genbank:NM_012809.2,RGD:2368	2',3'-cyclic nucleotide 3' phosphodiesterase	GO:0005654,GO:0005737,GO:0005741,GO:0005743,GO:0005829,GO:0032496,GO:0035748,GO:0005874,GO:0035749,GO:0005886,GO:0042470,GO:0042995,GO:0043209,GO:0046902,GO:0048471,GO:0048709,GO:0000226,GO:0003723,GO:0004113,GO:0005615,GO:0005634,GO:0005902,GO:0007409,GO:0007568,GO:0008344,GO:0009214,GO:0009636,GO:0016020,GO:0030551,GO:0030900,GO:0031143	nucleoplasm|cytoplasm|mitochondrial outer membrane|mitochondrial inner membrane|cytosol|response to lipopolysaccharide|myelin sheath abaxonal region|microtubule|myelin sheath adaxonal region|plasma membrane|melanosome|cell projection|myelin sheath|regulation of mitochondrial membrane permeability|perinuclear region of cytoplasm|oligodendrocyte differentiation|microtubule cytoskeleton organization…
Col19a1	105.0807459	51.74252107	158.4189707	3.061678625	1.614322856	0.01303494	0.54883159	Up	0.104083	0.0686402	0.102529	0.182255	0.196662	0.377368	GeneID:367236,Genbank:XM_017596765.1,RGD:1308920	collagen type XIX alpha 1 chain	GO:0008150,GO:0030198,GO:0003674,GO:0005575,GO:0007519	biological_process|extracellular matrix organization|molecular_function|cellular_component|skeletal muscle tissue development
Col1a2	3511.033053	4814.158579	2207.907528	0.458627918	-1.124603915	7.52E-06	0.01006371	Down	29.6346	24.5882	24.3358	9.21059	16.3865	7.8241	GeneID:84352,Genbank:NM_053356.1,RGD:621351	collagen type I alpha 2 chain	GO:0071230,GO:0030674,GO:0003674,GO:0071300,GO:0031012,GO:0005201,GO:0071310,GO:0005576,GO:0071873,GO:0005581,GO:0005584,GO:0005615,GO:0042802,GO:0005622,GO:0097067,GO:0043589,GO:0005783,GO:0046332,GO:0007179,GO:0046872,GO:0007266,GO:0001501,GO:0048407,GO:0008217,GO:0001568,GO:0070208,GO:0030199,GO:0002020	cellular response to amino acid stimulus|protein binding, bridging|molecular_function|cellular response to retinoic acid|extracellular matrix|extracellular matrix structural constituent|cellular response to organic substance|extracellular region|response to norepinephrine|collagen trimer|collagen type I trimer|extracellular space|identical protein binding|intracellular|cellular response to thyroi…	rno04151,rno04512,rno04510,rno04611,rno04926,rno04974,rno04933,rno05165,rno05146	PI3K-Akt signaling pathway|ECM-receptor interaction|Focal adhesion|Platelet activation|Relaxin signaling pathway|Protein digestion and absorption|AGE-RAGE signaling pathway in diabetic complications|Human papillomavirus infection|Amoebiasis
Col23a1	26.94193818	5.954314208	47.92956216	8.049552054	3.008908502	0.048252345	0.886045509	Up	0.0240747	0.0395765	0.0483255	0.647785	0.0227018	0.318236	GeneID:353303,Genbank:NM_181636.2,RGD:727898	collagen type XXIII alpha 1 chain	GO:0008201,GO:0009986,GO:0016021,GO:0042802,GO:0042803,GO:0070207,GO:0005581,GO:0005615,GO:0005886	heparin binding|cell surface|integral component of membrane|identical protein binding|protein homodimerization activity|protein homotrimerization|collagen trimer|extracellular space|plasma membrane
Col2a1	69.73682996	104.4455188	35.02814112	0.335372369	-1.576164261	6.23E-06	0.008975357	Down	0.384922	0.432926	0.366806	0.117788	0.129496	0.111982	GeneID:25412,Genbank:XM_006242308.3,RGD:2375	collagen type II alpha 1 chain	GO:0002062,GO:0003007,GO:0003417,GO:0005201,GO:0006029,GO:0005576,GO:0005578,GO:0007417,GO:0005581,GO:0007601,GO:0007605,GO:0042472,GO:0009612,GO:0042802,GO:0010165,GO:0046872,GO:0048407,GO:0001501,GO:0060351,GO:0048705,GO:0001502,GO:0071260,GO:0048839,GO:0071300,GO:0051216,GO:0001503,GO:0071306,GO:0001894,GO:0071316,GO:0071356,GO:0001958,GO:0071374,GO:0071375,GO:0071599,GO:0005585,GO:0005604,GO:…	chondrocyte differentiation|heart morphogenesis|growth plate cartilage development|extracellular matrix structural constituent|proteoglycan metabolic process|extracellular region|proteinaceous extracellular matrix|central nervous system development|collagen trimer|visual perception|sensory perception of sound|inner ear morphogenesis|response to mechanical stimulus|identical protein binding|respon…	rno04151,rno04512,rno04510,rno04974,rno05165	PI3K-Akt signaling pathway|ECM-receptor interaction|Focal adhesion|Protein digestion and absorption|Human papillomavirus infection
Cpxm1	61.63997045	86.55425411	36.72568679	0.424308281	-1.236815259	0.000639215	0.140852818	Down	0.915947	0.525203	0.84656	0.289095	0.343842	0.26509	GeneID:296156,Genbank:NM_001106511.1,RGD:1306937	carboxypeptidase X (M14 family), member 1	GO:0004185,GO:0005615,GO:0006508,GO:0006518,GO:0008270,GO:0016485,GO:0004180,GO:0004181	serine-type carboxypeptidase activity|extracellular space|proteolysis|peptide metabolic process|zinc ion binding|protein processing|carboxypeptidase activity|metallocarboxypeptidase activity
Csdc2	60.3188779	82.72692445	37.91083135	0.458264726	-1.125746854	0.013868892	0.562260504	Down	1.12233	0.618559	0.689173	0.212598	0.360711	0.417597	GeneID:266600,Genbank:NM_001170542.1,RGD:628780	cold shock domain containing C2	GO:0005515,GO:0005634,GO:0005737,GO:0006355,GO:0006397,GO:0008134,GO:0043488,GO:0003677,GO:0003723,GO:0003730	protein binding|nucleus|cytoplasm|regulation of transcription, DNA-templated|mRNA processing|transcription factor binding|regulation of mRNA stability|DNA binding|RNA binding|mRNA 3'-UTR binding
Csf1	1698.066899	1017.31962	2378.814177	2.338315442	1.225469565	0.020126104	0.644330598	Up	2.83196	2.96475	3.42796	7.32349	3.65091	9.40635	GeneID:78965,Genbank:XM_008761428.2,RGD:621063	colony stimulating factor 1	GO:0005615,GO:0005886,GO:0006954,GO:0007169,GO:0030225,GO:0008083,GO:0030278,GO:0030316,GO:0008283,GO:0030335,GO:0032270,GO:0045651,GO:0032946,GO:0045657,GO:0045672,GO:0045860,GO:0046579,GO:0001503,GO:0048471,GO:0001954,GO:0002158,GO:0048873,GO:0003006,GO:0005125,GO:0005157,GO:0008284,GO:0010469,GO:0010628,GO:0010744,GO:0010759,GO:0038145,GO:0040018,GO:0016021,GO:0042476,GO:0042488,GO:0042802,GO:…	extracellular space|plasma membrane|inflammatory response|transmembrane receptor protein tyrosine kinase signaling pathway|macrophage differentiation|growth factor activity|regulation of ossification|osteoclast differentiation|cell proliferation|positive regulation of cell migration|positive regulation of cellular protein metabolic process|positive regulation of macrophage differentiation|positiv…	rno04014,rno04015,rno04010,rno04668,rno04151,rno04060,rno04640,rno04380,rno05323	Ras signaling pathway|Rap1 signaling pathway|MAPK signaling pathway|TNF signaling pathway|PI3K-Akt signaling pathway|Cytokine-cytokine receptor interaction|Hematopoietic cell lineage|Osteoclast differentiation|Rheumatoid arthritis
Csrnp3	174.302128	234.7884922	113.8157638	0.484758698	-1.04466131	0.025380959	0.699991347	Down	1.29469	2.07231	1.98866	0.65573	1.55473	0.298621	GeneID:311093,Genbank:NM_001271225.1,RGD:1306214	cysteine and serine rich nuclear protein 3	GO:0006366,GO:0010923,GO:0043065,GO:0043565,GO:0045944,GO:0001228,GO:0003700,GO:0005634	transcription by RNA polymerase II|negative regulation of phosphatase activity|positive regulation of apoptotic process|sequence-specific DNA binding|positive regulation of transcription by RNA polymerase II|transcriptional activator activity, RNA polymerase II transcription regulatory region sequence-specific DNA binding|DNA binding transcription factor activity|nucleus
Csrp3	216.3820229	299.0991851	133.6648607	0.446891424	-1.162003737	0.012037876	0.536045819	Down	10.4145	5.1694	7.1163	1.77836	3.13528	4.80655	GeneID:117505,Genbank:XM_006229237.2,RGD:71092	cysteine and glycine rich protein 3	GO:0005856,GO:0006351,GO:0006874,GO:0007517,GO:0008307,GO:0042805,GO:0010831,GO:0043426,GO:0030018,GO:0045662,GO:0045663,GO:0045944,GO:0046872,GO:0048738,GO:0051091,GO:0001974,GO:0002026,GO:0003300,GO:0003779,GO:0005515,GO:0005634,GO:0005737,GO:0031433,GO:0033365,GO:0035995,GO:0055003,GO:0042802,GO:0060048,GO:0061629,GO:1903919,GO:1903920	cytoskeleton|transcription, DNA-templated|cellular calcium ion homeostasis|muscle organ development|structural constituent of muscle|actinin binding|positive regulation of myotube differentiation|MRF binding|Z disc|negative regulation of myoblast differentiation|positive regulation of myoblast differentiation|positive regulation of transcription by RNA polymerase II|metal ion binding|cardiac musc…
Ctsw	47.77071097	68.40560407	27.13581786	0.396689982	-1.33391613	0.007799248	0.448097911	Down	1.26395	0.761506	0.870427	0.173264	0.668712	0.239481	GeneID:293676,Genbank:NM_001024242.1,RGD:1309354	cathepsin W	GO:0051603,GO:0004197,GO:0005615,GO:0005764	proteolysis involved in cellular protein catabolic process|cysteine-type endopeptidase activity|extracellular space|lysosome	rno04142,rno04210	Lysosome|Apoptosis
Cxcl10	4232.292144	24.1669053	8440.417383	349.2552015	8.448137792	0.0057016	0.389748041	Up	0.499038	0.571209	0.686871	124.569	2.85538	444.886	GeneID:245920,Genbank:NM_139089.1,RGD:620209	C-X-C motif chemokine ligand 10	GO:0006935,GO:0006954,GO:0006955,GO:0007186,GO:0010819,GO:0008009,GO:0010996,GO:0016525,GO:0030335,GO:0030816,GO:0032496,GO:0048248,GO:0051281,GO:0033280,GO:0034605,GO:0051607,GO:0070098,GO:0071222,GO:0002690,GO:0090026,GO:1901509,GO:0005125,GO:1901740,GO:0005576,GO:0005615,GO:0008201,GO:0008284,GO:0009409,GO:0009615,GO:0009897,GO:0010332,GO:0042118,GO:0010469,GO:0042127,GO:0010818,GO:0043950,GO:…	chemotaxis|inflammatory response|immune response|G-protein coupled receptor signaling pathway|regulation of T cell chemotaxis|chemokine activity|response to auditory stimulus|negative regulation of angiogenesis|positive regulation of cell migration|positive regulation of cAMP metabolic process|response to lipopolysaccharide|CXCR3 chemokine receptor binding|positive regulation of release of seques…	rno04668,rno04060,rno04620,rno04622,rno04623,rno04657,rno04062,rno05164	TNF signaling pathway|Cytokine-cytokine receptor interaction|Toll-like receptor signaling pathway|RIG-I-like receptor signaling pathway|Cytosolic DNA-sensing pathway|IL-17 signaling pathway|Chemokine signaling pathway|Influenza A
Cyp27a1	1613.01213	651.6571405	2574.367119	3.950493225	1.982032787	0.025821496	0.70193993	Up	4.77407	7.2463	6.23964	23.625	7.5742	32.3654	GeneID:301517,Genbank:NM_178847.3,RGD:727915	cytochrome P450, family 27, subfamily a, polypeptide 1	GO:0005739,GO:0005740,GO:0005743,GO:0006706,GO:0008203,GO:0016705,GO:0020037,GO:0030343,GO:0031073,GO:0036378,GO:0055114,GO:0004497,GO:0005506	mitochondrion|mitochondrial envelope|mitochondrial inner membrane|steroid catabolic process|cholesterol metabolic process|oxidoreductase activity, acting on paired donors, with incorporation or reduction of molecular oxygen|heme binding|vitamin D3 25-hydroxylase activity|cholesterol 26-hydroxylase activity|calcitriol biosynthetic process from calciol|oxidation-reduction process|monooxygenase acti…	rno00120,rno03320,rno04979	Primary bile acid biosynthesis|PPAR signaling pathway|Cholesterol metabolism
Cyp2e1	3575.944308	4988.12107	2163.767546	0.433784087	-1.204950964	0.020918706	0.656930097	Down	38.1936	83.0933	67.6167	25.6074	41.412	10.8694	GeneID:25086,Genbank:NM_031543.1,RGD:2475	cytochrome P450, family 2, subfamily e, polypeptide 1	GO:0006805,GO:0008202,GO:0008392,GO:0008395,GO:0010181,GO:0020037,GO:0010193,GO:0031227,GO:0010243,GO:0042493,GO:0016098,GO:0042738,GO:0043231,GO:0045471,GO:0046483,GO:0055114,GO:0000139,GO:0004497,GO:0005506,GO:0005737,GO:0005739,GO:0005783,GO:0006082,GO:0006641,GO:0016491,GO:0016712,GO:0017144,GO:0019373,GO:0019899	xenobiotic metabolic process|steroid metabolic process|arachidonic acid epoxygenase activity|steroid hydroxylase activity|FMN binding|heme binding|response to ozone|intrinsic component of endoplasmic reticulum membrane|response to organonitrogen compound|response to drug|monoterpenoid metabolic process|exogenous drug catabolic process|intracellular membrane-bounded organelle|response to ethanol|h…	rno00140,rno00590,rno00591,rno00980,rno00982,rno00983,rno05204,rno04932	Steroid hormone biosynthesis|Arachidonic acid metabolism|Linoleic acid metabolism|Metabolism of xenobiotics by cytochrome P450|Drug metabolism - cytochrome P450|Drug metabolism - other enzymes|Chemical carcinogenesis|Non-alcoholic fatty liver disease (NAFLD)
Dao	10.91324146	2.322726928	19.503756	8.39692164	3.069860524	0.032096049	0.765807642	Up	0.0643451	0	0.0162466	0.155873	0.0614207	0.336831	GeneID:114027,Genbank:NM_053626.1,RGD:621138	D-amino-acid oxidase	GO:0055130,GO:0036088,GO:0005102,GO:0070178,GO:0042416,GO:0071949,GO:0005741,GO:0005777,GO:0005778,GO:0046416,GO:0005829,GO:0046983,GO:0006551,GO:0048037,GO:0006562,GO:0003884,GO:0055114	D-alanine catabolic process|D-serine catabolic process|signaling receptor binding|D-serine metabolic process|dopamine biosynthetic process|FAD binding|mitochondrial outer membrane|peroxisome|peroxisomal membrane|D-amino acid metabolic process|cytosol|protein dimerization activity|leucine metabolic process|cofactor binding|proline catabolic process|D-amino-acid oxidase activity|oxidation-reduction…	rno00260,rno00330,rno00472,rno04146	Glycine, serine and threonine metabolism|Arginine and proline metabolism|D-Arginine and D-ornithine metabolism|Peroxisome
Daxx	1804.966527	885.2425947	2724.69046	3.077902573	1.621947566	0.047469106	0.884665314	Up	4.22887	4.48954	4.03071	12.8932	4.58554	19.6367	GeneID:140926,Genbank:XM_006256110.3,RGD:621227	death-domain associated protein	GO:0002039,GO:0003713,GO:0003714,GO:0005515,GO:0006351,GO:0005634,GO:0006355,GO:0008134,GO:0008432,GO:0010038,GO:0030521,GO:0010832,GO:0016604,GO:0030578,GO:0016605,GO:0031396,GO:0031625,GO:0000122,GO:0042393,GO:0000281,GO:0042803,GO:0032147,GO:0000775,GO:0032183,GO:0043005,GO:0000792,GO:0043065,GO:0043066,GO:0001741,GO:0044297,GO:0001934,GO:0071276,GO:0045860,GO:0045892,GO:0071280,GO:0071356,GO:…	p53 binding|transcription coactivator activity|transcription corepressor activity|protein binding|transcription, DNA-templated|nucleus|regulation of transcription, DNA-templated|transcription factor binding|JUN kinase binding|response to metal ion|androgen receptor signaling pathway|negative regulation of myotube differentiation|nuclear body|PML body organization|PML body|regulation of protein ub…	rno04010,rno04210,rno05014,rno05168	MAPK signaling pathway|Apoptosis|Amyotrophic lateral sclerosis (ALS)|Herpes simplex infection
Dcp2	115.3644753	53.87541359	176.8535369	3.282639058	1.714856128	0.005777812	0.391822903	Up	0.949881	1.34179	0.246175	2.42092	1.55851	2.56538	GeneID:291604,Genbank:NM_001170469.1,RGD:1562909	decapping mRNA 2	GO:0090503,GO:0003723,GO:1904872,GO:0004534,GO:0005654,GO:0005737,GO:0006402,GO:0016442,GO:0030054,GO:0030145,GO:0032211,GO:0036464,GO:0050072,GO:0000290,GO:0000932,GO:0071044	RNA phosphodiester bond hydrolysis, exonucleolytic|RNA binding|regulation of telomerase RNA localization to Cajal body|5'-3' exoribonuclease activity|nucleoplasm|cytoplasm|mRNA catabolic process|RISC complex|cell junction|manganese ion binding|negative regulation of telomere maintenance via telomerase|cytoplasmic ribonucleoprotein granule|m7G(5')pppN diphosphatase activity|deadenylation-dependent…	rno03018	RNA degradation
Ddx3y	10.12643495	17.57259203	2.680277872	0.15252604	-2.712872528	0.00344751	0.294848702	Down	0.119929	0.104801	0.12946	0.0136428	0.0202031	0.0202754	GeneID:364073,Genbank:NM_001108858.1,RGD:1309586	DEAD (Asp-Glu-Ala-Asp) box helicase 3, Y-linked	GO:0005634,GO:0005730,GO:0005829,GO:0006413,GO:0007059,GO:0010468,GO:0010501,GO:0036464,GO:0003676,GO:0004004,GO:0005524	nucleus|nucleolus|cytosol|translational initiation|chromosome segregation|regulation of gene expression|RNA secondary structure unwinding|cytoplasmic ribonucleoprotein granule|nucleic acid binding|ATP-dependent RNA helicase activity|ATP binding	rno04622,rno05203,rno05161	RIG-I-like receptor signaling pathway|Viral carcinogenesis|Hepatitis B
Ddx58	7447.901659	1251.386894	13644.41642	10.90343562	3.446710887	0.002115958	0.23312879	Up	5.33737	6.02653	6.00228	69.807	18.0259	92.6517	GeneID:297989,Genbank:NM_001106645.1,RGD:1309460	DEXD/H-box helicase 58	GO:0043330,GO:0032587,GO:0003727,GO:0045087,GO:0032725,GO:0005524,GO:0045944,GO:0032727,GO:0005737,GO:0051607,GO:0005829,GO:0005923,GO:0008270,GO:0009597,GO:0032728,GO:0009615,GO:0060760,GO:0032755,GO:0010628,GO:0071360,GO:0032757,GO:0015629,GO:1902741,GO:0035549,GO:0016787,GO:0002230,GO:1904469,GO:0039529,GO:0030334,GO:0003690,GO:2000778,GO:0042802,GO:0031625,GO:0003725	response to exogenous dsRNA|ruffle membrane|single-stranded RNA binding|innate immune response|positive regulation of granulocyte macrophage colony-stimulating factor production|ATP binding|positive regulation of transcription by RNA polymerase II|positive regulation of interferon-alpha production|cytoplasm|defense response to virus|cytosol|bicellular tight junction|zinc ion binding|detection of …	rno04064,rno04622,rno04623,rno05162,rno05164,rno05161,rno05160,rno05168,rno05169	NF-kappa B signaling pathway|RIG-I-like receptor signaling pathway|Cytosolic DNA-sensing pathway|Measles|Influenza A|Hepatitis B|Hepatitis C|Herpes simplex infection|Epstein-Barr virus infection
Ddx60	5770.066778	494.8400862	11045.29347	22.32093514	4.480325565	0.000709493	0.147653346	Up	0.855001	1.20409	1.38095	27.404	5.14458	35.3606	GeneID:100360801,Genbank:XM_017600406.1,RGD:1560014	DEXD/H-box helicase 60
Defb4	3227.904459	2088.35903	4367.449889	2.091330957	1.064421389	0.030805972	0.755581795	Up	241.267	178.023	179.094	420.506	221.684	537.82	GeneID:64389,Genbank:NM_022544.2,RGD:619944	defensin beta 4	GO:0050829,GO:0005615,GO:0005622,GO:0050830,GO:0006935,GO:0008150,GO:0031640,GO:0031731,GO:0060326,GO:0061844,GO:0042056,GO:0003674,GO:0042742,GO:0005575	defense response to Gram-negative bacterium|extracellular space|intracellular|defense response to Gram-positive bacterium|chemotaxis|biological_process|killing of cells of other organism|CCR6 chemokine receptor binding|cell chemotaxis|antimicrobial humoral immune response mediated by antimicrobial peptide|chemoattractant activity|molecular_function|defense response to bacterium|cellular_component	rno04657	IL-17 signaling pathway
Defb5	31.77467612	61.49177001	2.057582237	0.0334611	-4.901371337	1.13E-09	5.31E-06	Down	4.44777	3.30902	6.58151	0	0	0	GeneID:641624,Genbank:NM_001037549.1,RGD:1563630	defensin beta 5	GO:0006935,GO:0031640,GO:0031731,GO:0042056,GO:0042742,GO:0050829,GO:0050830,GO:0060326,GO:0005615,GO:0061844,GO:0005622	chemotaxis|killing of cells of other organism|CCR6 chemokine receptor binding|chemoattractant activity|defense response to bacterium|defense response to Gram-negative bacterium|defense response to Gram-positive bacterium|cell chemotaxis|extracellular space|antimicrobial humoral immune response mediated by antimicrobial peptide|intracellular
Dhx58	1840.002548	206.7405285	3473.264567	16.80011458	4.070399167	0.001951037	0.224189719	Up	1.39065	1.24312	1.54754	23.7217	5.68372	35.809	GeneID:303538,Genbank:XM_006247315.3,RGD:1310093	DEXH-box helicase 58	GO:0005524,GO:0005737,GO:0008270,GO:0009615,GO:0016787,GO:0032480,GO:0032481,GO:0039534,GO:0039536,GO:0045088,GO:0045824,GO:0003677,GO:1900245,GO:0003725,GO:1900246,GO:0003727	ATP binding|cytoplasm|zinc ion binding|response to virus|hydrolase activity|negative regulation of type I interferon production|positive regulation of type I interferon production|negative regulation of MDA-5 signaling pathway|negative regulation of RIG-I signaling pathway|regulation of innate immune response|negative regulation of innate immune response|DNA binding|positive regulation of MDA-5 s…	rno04622	RIG-I-like receptor signaling pathway
Dnaja1	3497.539337	2324.547525	4670.531149	2.009221622	1.006636705	0.038035652	0.811286735	Up	21.1781	23.2775	25.6578	39.5753	30.2358	63.813	GeneID:65028,Genbank:NM_022934.1,RGD:620942	DnaJ heat shock protein family (Hsp40) member A1	GO:0005829,GO:0006457,GO:0007283,GO:0009408,GO:0015630,GO:0016020,GO:0043508,GO:0030317,GO:0030521,GO:0046872,GO:0030544,GO:0048471,GO:0050750,GO:0051082,GO:0051087,GO:0051223,GO:0000151,GO:0001664,GO:0001671,GO:0005515,GO:0005524,GO:0005634,GO:0005739,GO:0005783,GO:0030957,GO:0031397,GO:0031625,GO:0032781,GO:0042769,GO:0043065,GO:0055131,GO:0070585,GO:0043066,GO:1901998,GO:1903748,GO:1905259	cytosol|protein folding|spermatogenesis|response to heat|microtubule cytoskeleton|membrane|negative regulation of JUN kinase activity|flagellated sperm motility|androgen receptor signaling pathway|metal ion binding|Hsp70 protein binding|perinuclear region of cytoplasm|low-density lipoprotein particle receptor binding|unfolded protein binding|chaperone binding|regulation of protein transport|ubiqu…	rno04141	Protein processing in endoplasmic reticulum
Dtx3l	4987.426368	1280.767335	8694.0854	6.788184836	2.763025849	0.00103849	0.170622068	Up	2.48383	2.56969	2.64669	18.582	7.11315	23.5255	GeneID:498089,Genbank:XM_017598167.1,RGD:1565144	deltex E3 ubiquitin ligase 3L	GO:1901666,GO:0035563,GO:0008047,GO:0005634,GO:1902966,GO:0042393,GO:0008333,GO:2000646,GO:0044389,GO:0010390,GO:0005654,GO:2001034,GO:0045893,GO:0005737,GO:0005764,GO:0005769,GO:0019899,GO:0005829,GO:0051444,GO:0032092,GO:0051865,GO:0032991,GO:0006302,GO:0070936,GO:0006511,GO:0002230,GO:0097677,GO:0033522,GO:0004842,GO:1900182,GO:0033523,GO:0006974,GO:0004857	positive regulation of NAD+ ADP-ribosyltransferase activity|positive regulation of chromatin binding|enzyme activator activity|nucleus|positive regulation of protein localization to early endosome|histone binding|endosome to lysosome transport|positive regulation of receptor catabolic process|ubiquitin-like protein ligase binding|histone monoubiquitination|nucleoplasm|positive regulation of doubl…	rno04330	Notch signaling pathway
Ebf2	76.01810706	101.3839272	50.65228689	0.499608649	-1.001129643	0.003111551	0.283980713	Down	0.389608	0.274899	0.476317	0.158371	0.140032	0.253085	GeneID:361060,Genbank:NM_001108383.1,RGD:1310805	early B-cell factor 2	GO:0060612,GO:0001709,GO:0003677,GO:0003682,GO:0005634,GO:0006366,GO:0035563,GO:0045893,GO:0045944,GO:0046872,GO:0000978,GO:0046983,GO:0001077,GO:0050873	adipose tissue development|cell fate determination|DNA binding|chromatin binding|nucleus|transcription by RNA polymerase II|positive regulation of chromatin binding|positive regulation of transcription, DNA-templated|positive regulation of transcription by RNA polymerase II|metal ion binding|RNA polymerase II proximal promoter sequence-specific DNA binding|protein dimerization activity|transcript…
Eef1a2	203.6445568	276.4810162	130.8080974	0.473117826	-1.079728575	0.001426526	0.200204257	Down	3.50268	2.40089	2.57235	0.896268	1.17776	1.79222	GeneID:24799,Genbank:NM_012660.2,RGD:3781	eukaryotic translation elongation factor 1 alpha 2	GO:0043209,GO:0005515,GO:0051602,GO:0005525,GO:0090218,GO:0005622,GO:0005634,GO:0005737,GO:0005853,GO:0006412,GO:0006414,GO:0010035,GO:0019901,GO:0003746,GO:0043025,GO:0043065,GO:0003924	myelin sheath|protein binding|response to electrical stimulus|GTP binding|positive regulation of lipid kinase activity|intracellular|nucleus|cytoplasm|eukaryotic translation elongation factor 1 complex|translation|translational elongation|response to inorganic substance|protein kinase binding|translation elongation factor activity|neuronal cell body|positive regulation of apoptotic process|GTPase…	rno03013,rno05134	RNA transport|Legionellosis
Efnb3	26.90735543	37.16781104	16.64689983	0.447884859	-1.158800197	0.027958999	0.728333877	Down	0.183118	0.219456	0.179022	0.0829895	0.10884	0.0435523	GeneID:360546,Genbank:NM_001100980.4,RGD:2541	ephrin B3	GO:0007411,GO:0007628,GO:0016021,GO:0016198,GO:0031295,GO:0046875,GO:0048013,GO:0005886,GO:0050771	axon guidance|adult walking behavior|integral component of membrane|axon choice point recognition|T cell costimulation|ephrin receptor binding|ephrin receptor signaling pathway|plasma membrane|negative regulation of axonogenesis	rno04360	Axon guidance
Egr3	72.51208121	101.4269512	43.59721127	0.429838527	-1.218133296	0.018133564	0.627803412	Down	0.402727	0.546521	0.920685	0.159258	0.333127	0.286842	GeneID:25148,Genbank:XM_006252240.3,RGD:2545	early growth response 3	GO:0006351,GO:0007274,GO:0007422,GO:0033089,GO:0035767,GO:0035924,GO:0043066,GO:0043565,GO:0044344,GO:0045586,GO:0045944,GO:0001938,GO:0046872,GO:0002042,GO:0005634	transcription, DNA-templated|neuromuscular synaptic transmission|peripheral nervous system development|positive regulation of T cell differentiation in thymus|endothelial cell chemotaxis|cellular response to vascular endothelial growth factor stimulus|negative regulation of apoptotic process|sequence-specific DNA binding|cellular response to fibroblast growth factor stimulus|regulation of gamma-d…	rno04625,rno05203,rno05161	C-type lectin receptor signaling pathway|Viral carcinogenesis|Hepatitis B
Eif2ak2	6218.21233	1219.375003	11217.04966	9.199015588	3.201479483	0.001431237	0.200204257	Up	4.46801	5.22217	5.3919	50.9434	14.5815	64.3271	GeneID:54287,Genbank:XM_008764426.2,RGD:3402	eukaryotic translation initiation factor 2-alpha kinase 2	GO:0004694,GO:0004715,GO:0005515,GO:0005524,GO:0005634,GO:0005737,GO:0010033,GO:0010998,GO:0005829,GO:0017148,GO:0018108,GO:0030968,GO:0035455,GO:0032496,GO:0042802,GO:0032722,GO:0042981,GO:0043065,GO:0043066,GO:0043330,GO:0000186,GO:0051607,GO:0045071,GO:1900225,GO:0001819,GO:1901224,GO:0003725,GO:1901532,GO:0004672,GO:1902033,GO:1902036,GO:0006351,GO:0006412,GO:0006468,GO:0009612,GO:0009615,GO:…	eukaryotic translation initiation factor 2alpha kinase activity|non-membrane spanning protein tyrosine kinase activity|protein binding|ATP binding|nucleus|cytoplasm|response to organic substance|regulation of translational initiation by eIF2 alpha phosphorylation|cytosol|negative regulation of translation|peptidyl-tyrosine phosphorylation|endoplasmic reticulum unfolded protein response|response t…	rno04141,rno04217,rno05203,rno05162,rno05164,rno05160,rno05168,rno05167,rno05169,rno05165	Protein processing in endoplasmic reticulum|Necroptosis|Viral carcinogenesis|Measles|Influenza A|Hepatitis C|Herpes simplex infection|Kaposi's sarcoma-associated herpesvirus infection|Epstein-Barr virus infection|Human papillomavirus infection
Enpp4	8659.855184	4083.896179	13235.81419	3.240977147	1.696428848	0.003389408	0.292212155	Up	14.3543	17.232	16.8025	55.1662	26.2392	66.9191	GeneID:301261,Genbank:XM_006244601.3,RGD:1308689	ectonucleotide pyrophosphatase/phosphodiesterase 4	GO:0047710,GO:0016021,GO:0030194,GO:0046130	bis(5'-adenosyl)-triphosphatase activity|integral component of membrane|positive regulation of blood coagulation|purine ribonucleoside catabolic process	rno00230	Purine metabolism
Epsti1	190.7253047	104.3123762	277.1382332	2.656810661	1.409695417	0.035070304	0.792360434	Up	0.909192	1.36208	1.39508	3.40131	1.52129	4.7712	GeneID:498547,Genbank:NM_001044257.1,RGD:1563207	epithelial stromal interaction 1 (breast)
Fabp3	188.1774117	252.6975734	123.65725	0.489348783	-1.031064984	0.005852686	0.391822903	Down	10.9647	7.026	7.45702	2.3984	4.14354	5.11723	GeneID:79131,Genbank:NM_024162.1,RGD:69048	fatty acid binding protein 3	GO:0042632,GO:0005615,GO:0044539,GO:0005737,GO:0046320,GO:0005739,GO:0005829,GO:0006631,GO:0006635,GO:0008092,GO:0050543,GO:0015909,GO:0055091,GO:0016528,GO:0070538,GO:0016529,GO:0070542,GO:0032868,GO:0005324,GO:2001245,GO:0036041,GO:0005504,GO:0042493	cholesterol homeostasis|extracellular space|long-chain fatty acid import|cytoplasm|regulation of fatty acid oxidation|mitochondrion|cytosol|fatty acid metabolic process|fatty acid beta-oxidation|cytoskeletal protein binding|icosatetraenoic acid binding|long-chain fatty acid transport|phospholipid homeostasis|sarcoplasm|oleic acid binding|sarcoplasmic reticulum|response to fatty acid|response to i…	rno03320	PPAR signaling pathway
Fam46a	3337.127681	1759.258967	4914.996396	2.79378789	1.482222492	0.008514217	0.460899649	Up	7.31903	8.67969	7.83779	24.9345	10.5818	27.9575	GeneID:300870,Genbank:XM_006243474.3,RGD:1311381	family with sequence similarity 46, member A
Fam64a	20.02434829	29.7637038	10.28499278	0.34555487	-1.533013285	0.024438411	0.689573968	Down	0.337667	0.174047	0.482581	0.097723	0.108157	0.0240017	GeneID:360559,Genbank:XM_006246760.2,RGD:1308747	family with sequence similarity 64, member A	GO:0005634,GO:0005730	nucleus|nucleolus
Faxdc2	3058.699721	1912.803923	4204.595519	2.198132003	1.136278026	0.034267851	0.786564775	Up	10.7776	10.8927	9.73621	24.4148	10.7243	29.8976	GeneID:691221,Genbank:XM_017597634.1,RGD:1586284	fatty acid hydroxylase domain containing 2	GO:0016020,GO:0016126,GO:0016491,GO:0000254,GO:0005789,GO:0006629	membrane|sterol biosynthetic process|oxidoreductase activity|C-4 methylsterol oxidase activity|endoplasmic reticulum membrane|lipid metabolic process
Fbxo39	147.3027225	24.89506446	269.7103806	10.83388962	3.437479393	0.003512913	0.295163279	Up	0.311077	0.358804	0.217698	2.03301	1.28573	4.73195	GeneID:303287,Genbank:XM_006246729.3,RGD:1311464	F-box protein 39	GO:0019005,GO:0031146	SCF ubiquitin ligase complex|SCF-dependent proteasomal ubiquitin-dependent protein catabolic process
Fbxw17	545.966747	254.6186818	837.3148122	3.288505016	1.717431871	0.011808553	0.531990991	Up	1.13527	0.994957	0.989934	3.42247	1.50855	4.32842	GeneID:361219,Genbank:XM_008771541.2,RGD:1566133	F-box and WD-40 domain protein 17
Fcer2	93.70866564	132.1867493	55.23058202	0.417822379	-1.259038329	0.003401081	0.292212155	Down	1.41083	0.890836	1.00321	0.238028	0.804049	0.331319	GeneID:171075,Genbank:NM_133550.2,RGD:619997	Fc fragment of IgE receptor II	GO:0030246,GO:0051000,GO:0051712,GO:0051770,GO:0002925,GO:0009897,GO:0016021	carbohydrate binding|positive regulation of nitric-oxide synthase activity|positive regulation of killing of cells of other organism|positive regulation of nitric-oxide synthase biosynthetic process|positive regulation of humoral immune response mediated by circulating immunoglobulin|external side of plasma membrane|integral component of membrane	rno04640,rno05169	Hematopoietic cell lineage|Epstein-Barr virus infection
Fcnb	1022.882885	468.8211513	1576.944618	3.363637953	1.750022429	0.013355614	0.553430647	Up	4.8869	8.51097	9.04524	25.2733	11.9857	36.1679	GeneID:114091,Genbank:NM_053634.1,RGD:621222	ficolin B	GO:0005576,GO:0005581,GO:0007186,GO:0008329,GO:0030246,GO:0031232,GO:0033691,GO:0034394,GO:0043654,GO:0046597,GO:0046872,GO:0001664,GO:0097367,GO:0001867,GO:2000484,GO:0002752	extracellular region|collagen trimer|G-protein coupled receptor signaling pathway|signaling pattern recognition receptor activity|carbohydrate binding|extrinsic component of external side of plasma membrane|sialic acid binding|protein localization to cell surface|recognition of apoptotic cell|negative regulation of viral entry into host cell|metal ion binding|G-protein coupled receptor binding|ca…
Fgl1	10.80699112	4.993451717	16.62053052	3.32846525	1.734857106	0.039264752	0.816236182	Up	0.1199	0.0994817	0.0203143	0.346711	0.114191	0.30634	GeneID:246186,Genbank:NM_172010.1,RGD:620169	fibrinogen-like 1	GO:0060612,GO:0008203,GO:0010906,GO:0035634	adipose tissue development|cholesterol metabolic process|regulation of glucose metabolic process|response to stilbenoid
Fndc5	88.72991107	125.4307398	52.02908232	0.41480328	-1.269500792	0.0064125	0.408969373	Down	1.60667	0.857949	1.27715	0.242085	0.745247	0.486379	GeneID:260327,Genbank:NM_001270981.1,RGD:708525	fibronectin type III domain containing 5	GO:0005778,GO:0005783,GO:0005886,GO:0010469,GO:0014850,GO:0016021,GO:0090336,GO:0005179,GO:0005576	peroxisomal membrane|endoplasmic reticulum|plasma membrane|regulation of signaling receptor activity|response to muscle activity|integral component of membrane|positive regulation of brown fat cell differentiation|hormone activity|extracellular region
Gbp1	1388.780177	13.59930068	2763.961054	203.2428813	7.667061012	0.007744836	0.448097911	Up	0.0677546	0.0472413	0.0484128	5.92628	0.160406	20.6087	GeneID:304266,Genbank:XM_017591353.1,RGD:1311877	guanylate binding protein 1	GO:1903076,GO:0050830,GO:0005829,GO:1903077,GO:0050848,GO:0019002,GO:0050860,GO:0019003,GO:0019899,GO:0019955,GO:0020005,GO:0030507,GO:0051260,GO:0031410,GO:0051879,GO:0035458,GO:0070373,GO:0042802,GO:0071346,GO:0042803,GO:0003779,GO:1900025,GO:0042832,GO:0003924,GO:1900041,GO:0044406,GO:0005525	regulation of protein localization to plasma membrane|defense response to Gram-positive bacterium|cytosol|negative regulation of protein localization to plasma membrane|regulation of calcium-mediated signaling|GMP binding|negative regulation of T cell receptor signaling pathway|GDP binding|enzyme binding|cytokine binding|symbiont-containing vacuole membrane|spectrin binding|protein homooligomeriz…	rno04621	NOD-like receptor signaling pathway
Gbp2	7972.447191	969.4447672	14975.44961	15.44745005	3.949296803	0.014164546	0.565675809	Up	7.26033	7.17759	7.88307	108.19	16.1835	200.132	GeneID:171164,Genbank:NM_133624.2,RGD:621810	guanylate binding protein 2	GO:0071346,GO:0042832,GO:0005654,GO:0044406,GO:0005829,GO:0015629,GO:0020005,GO:0048471,GO:0050830,GO:0031410,GO:0071222,GO:0035458,GO:0000139,GO:0003924,GO:0005525	cellular response to interferon-gamma|defense response to protozoan|nucleoplasm|adhesion of symbiont to host|cytosol|actin cytoskeleton|symbiont-containing vacuole membrane|perinuclear region of cytoplasm|defense response to Gram-positive bacterium|cytoplasmic vesicle|cellular response to lipopolysaccharide|cellular response to interferon-beta|Golgi membrane|GTPase activity|GTP binding	rno04621	NOD-like receptor signaling pathway
Gbp3	85.4681834	0.332031887	170.6043349	513.819128	9.005116788	0.002771269	0.26548057	Up	0	0.00542187	0	0.542729	0.0311199	1.5234	GeneID:685116,Genbank:XM_003749410.4,RGD:1597766	guanylate binding protein 3	GO:0003924,GO:0005525	GTPase activity|GTP binding	rno04621	NOD-like receptor signaling pathway
Gbp4	620.217081	26.76401685	1213.670145	45.34708492	5.502937907	0.003891761	0.314413201	Up	0.133838	0.133702	0.298444	8.64993	0.577258	15.2669	GeneID:310917,Genbank:XM_006233424.3,RGD:1310579	guanylate binding protein 4	GO:0020005,GO:0031410,GO:0035458,GO:0042832,GO:0044406,GO:0050830,GO:0071346,GO:0003924,GO:0005525,GO:0005829	symbiont-containing vacuole membrane|cytoplasmic vesicle|cellular response to interferon-beta|defense response to protozoan|adhesion of symbiont to host|defense response to Gram-positive bacterium|cellular response to interferon-gamma|GTPase activity|GTP binding|cytosol	rno04621	NOD-like receptor signaling pathway
Gbp5	4423.134734	550.8920799	8295.377387	15.05808068	3.912465989	0.006052069	0.398631955	Up	3.10193	3.22911	4.06081	56.7522	8.90023	82.9324	GeneID:362050,Genbank:NM_001108569.3,RGD:1311040	guanylate binding protein 5	GO:0042802,GO:0045089,GO:0050702,GO:0051289,GO:0071346,GO:0072616,GO:1900017,GO:1900227,GO:0003924,GO:0005525,GO:0031410	identical protein binding|positive regulation of innate immune response|interleukin-1 beta secretion|protein homotetramerization|cellular response to interferon-gamma|interleukin-18 secretion|positive regulation of cytokine production involved in inflammatory response|positive regulation of NLRP3 inflammasome complex assembly|GTPase activity|GTP binding|cytoplasmic vesicle	rno04621	NOD-like receptor signaling pathway
Gch1	551.4472463	238.919994	863.9744987	3.616166585	1.854461139	0.010996518	0.517499451	Up	4.91154	4.12464	5.05401	20.4453	6.57036	23.0787	GeneID:29244,Genbank:NM_024356.1,RGD:61992	GTP cyclohydrolase 1	GO:0005525,GO:0005634,GO:0005654,GO:0005737,GO:0005829,GO:0031965,GO:0006729,GO:0032496,GO:0032991,GO:0034341,GO:0051066,GO:0034612,GO:0051260,GO:0035998,GO:0042311,GO:0051291,GO:0065003,GO:2000121,GO:0003924,GO:0003934,GO:0005509,GO:0005515,GO:0008217,GO:0008270,GO:0010460,GO:0014916,GO:0030742,GO:0042416,GO:0031369,GO:0042559,GO:0031410,GO:0042803,GO:0045776,GO:0046654,GO:0048265,GO:0050662,GO:…	GTP binding|nucleus|nucleoplasm|cytoplasm|cytosol|nuclear membrane|tetrahydrobiopterin biosynthetic process|response to lipopolysaccharide|protein-containing complex|response to interferon-gamma|dihydrobiopterin metabolic process|response to tumor necrosis factor|protein homooligomerization|7,8-dihydroneopterin 3'-triphosphate biosynthetic process|vasodilation|protein heterooligomerization|protei…	rno00790	Folate biosynthesis
Gna14	1295.001485	817.9216792	1772.08129	2.166565987	1.115410177	0.001753784	0.214387605	Up	3.61448	3.20501	3.63892	8.13101	4.67413	8.76879	GeneID:309242,Genbank:XM_008760288.2,RGD:1308122	G protein subunit alpha 14	GO:0004871,GO:0005525,GO:0005575,GO:0005834,GO:0007188,GO:0008150,GO:0031683,GO:0060158,GO:0001664,GO:0003674,GO:0003924	signal transducer activity|GTP binding|cellular_component|heterotrimeric G-protein complex|adenylate cyclase-modulating G-protein coupled receptor signaling pathway|biological_process|G-protein beta/gamma-subunit complex binding|phospholipase C-activating dopamine receptor signaling pathway|G-protein coupled receptor binding|molecular_function|GTPase activity	rno04020,rno05146,rno05142	Calcium signaling pathway|Amoebiasis|Chagas disease (American trypanosomiasis)
Gpr141	35.40816599	22.5452031	48.27112889	2.141082015	1.09834006	0.016805259	0.605130223	Up	0.527124	0.765262	0.349091	1.48571	1.14648	1.05882	GeneID:291179,Genbank:NM_181767.1,RGD:727906	G protein-coupled receptor 141	GO:0004930,GO:0007186,GO:0016021	G-protein coupled receptor activity|G-protein coupled receptor signaling pathway|integral component of membrane
Gpr174	162.0265909	218.2465808	105.806601	0.484803018	-1.044529415	0.01166562	0.531990991	Down	1.16105	0.982929	1.10142	0.246076	0.812638	0.33931	GeneID:302373,Genbank:XM_008773340.2,RGD:1564689	G protein-coupled receptor 174	GO:0045125,GO:0007186,GO:0016021,GO:0043029	bioactive lipid receptor activity|G-protein coupled receptor signaling pathway|integral component of membrane|T cell homeostasis
Grifin	34.52125012	52.93232268	16.11017756	0.304354254	-1.716176566	0.009667856	0.484168313	Down	0.679482	1.66237	1.64967	0.374542	0.0920677	0.598799	GeneID:117130,Genbank:XM_008768938.1,RGD:71055	galectin-related inter-fiber protein	GO:0030246	carbohydrate binding
Grik4	35.28997094	48.29842311	22.28151877	0.46133015	-1.116128513	0.01578269	0.592921407	Down	0.111881	0.187524	0.2146	0.0670362	0.111245	0.0247278	GeneID:24406,Genbank:XM_017595455.1,RGD:2734	glutamate ionotropic receptor kainate type subunit 4	GO:0043204,GO:0032983,GO:0005634,GO:0045202,GO:0006811,GO:0045211,GO:0034220,GO:0007268,GO:0008066,GO:0008328,GO:0015277,GO:0035235,GO:0016020,GO:0035249,GO:0030054,GO:0050804,GO:0042734,GO:0030424,GO:0060079,GO:0030425,GO:0004970,GO:0098839,GO:0031960,GO:1904315,GO:0043195,GO:0005234	perikaryon|kainate selective glutamate receptor complex|nucleus|synapse|ion transport|postsynaptic membrane|ion transmembrane transport|chemical synaptic transmission|glutamate receptor activity|ionotropic glutamate receptor complex|kainate selective glutamate receptor activity|ionotropic glutamate receptor signaling pathway|membrane|synaptic transmission, glutamatergic|cell junction|modulation o…	rno04080,rno04724	Neuroactive ligand-receptor interaction|Glutamatergic synapse
Gtf2f2	303.211586	192.2185911	414.2045809	2.154862225	1.107595631	0.00984244	0.487006898	Up	1.98844	2.05085	2.12915	4.23057	2.63757	6.08182	GeneID:81674,Genbank:NM_031042.3,RGD:620772	general transcription factor IIF subunit 2	GO:0045899,GO:0004386,GO:0045944,GO:0005524,GO:0097550,GO:0005634,GO:0005674,GO:0005675,GO:0006355,GO:0006366,GO:0006367,GO:0015630,GO:0000991,GO:0032968,GO:0003674,GO:0003677	positive regulation of RNA polymerase II transcriptional preinitiation complex assembly|helicase activity|positive regulation of transcription by RNA polymerase II|ATP binding|transcriptional preinitiation complex|nucleus|transcription factor TFIIF complex|holo TFIIH complex|regulation of transcription, DNA-templated|transcription by RNA polymerase II|transcription initiation from RNA polymerase …	rno03022	Basal transcription factors
Gzmbl3	5.829187673	1.65056442	10.00781092	6.063265875	2.600095086	0.037190024	0.804817857	Up	0	0	0.0210635	0.0599258	0.23494	0.137536	GeneID:100361261,Genbank:XM_002728285.4,RGD:2320502	Granzyme B-like 3	GO:0016485,GO:0030141,GO:0042267,GO:0004252,GO:0006508,GO:0008626	protein processing|secretory granule|natural killer cell mediated cytotoxicity|serine-type endopeptidase activity|proteolysis|granzyme-mediated apoptotic signaling pathway
Havcr1	23.45605803	33.5329997	13.37911635	0.398983582	-1.325598712	0.018599433	0.629839145	Down	0.139868	0.150588	0.070892	0.0235708	0.0740879	0.0419303	GeneID:286934,Genbank:XM_017597052.1,RGD:708425	hepatitis A virus cellular receptor 1	GO:0045335,GO:0005615,GO:0046677,GO:0005737,GO:0046718,GO:0006911,GO:0007584,GO:0009986,GO:0010046,GO:0016021,GO:0016324,GO:0031514,GO:0033005,GO:0001618,GO:0033574,GO:0001786,GO:0042493,GO:0003674	phagocytic vesicle|extracellular space|response to antibiotic|cytoplasm|viral entry into host cell|phagocytosis, engulfment|response to nutrient|cell surface|response to mycotoxin|integral component of membrane|apical plasma membrane|motile cilium|positive regulation of mast cell activation|virus receptor activity|response to testosterone|phosphatidylserine binding|response to drug|molecular_func…
Helz2	9692.379288	3166.122251	16218.63633	5.122555302	2.356863654	0.000598495	0.135058023	Up	5.81241	6.9718	7.27337	37.042	16.4486	45.353	GeneID:296474,Genbank:NM_001305276.1,RGD:1306056	helicase with zinc finger 2, transcriptional coactivator	GO:0030374,GO:0045944	ligand-dependent nuclear receptor transcription coactivator activity|positive regulation of transcription by RNA polymerase II
Herc6	13676.91416	1037.608904	26316.21942	25.36236853	4.664617577	0.005104523	0.362150447	Up	3.61315	4.41196	3.84588	91.12	15.2276	176.99	GeneID:362376,Genbank:XM_008762963.2,RGD:1561739	HECT and RLD domain containing E3 ubiquitin protein ligase family member 6	GO:0005634,GO:0005737,GO:0005829,GO:0016567,GO:0061630,GO:0002244,GO:0004842	nucleus|cytoplasm|cytosol|protein ubiquitination|ubiquitin protein ligase activity|hematopoietic progenitor cell differentiation|ubiquitin-protein transferase activity
Hfe2	82.36450779	119.0845557	45.64445988	0.383294539	-1.383474651	1.74E-05	0.013454988	Down	1.69232	1.29304	1.37335	0.347298	0.527027	0.672956	GeneID:310681,Genbank:NM_001012080.1,RGD:1310195	hemochromatosis type 2 (juvenile)	GO:0006879,GO:0008150,GO:0009986,GO:0015026,GO:0045944,GO:0016323,GO:0016540,GO:0055072,GO:0070724,GO:0071773,GO:0098797,GO:0098821,GO:1990459,GO:0000122,GO:0003674,GO:0005102,GO:0005615,GO:0005886,GO:0030509,GO:0030514,GO:0031225,GO:0032924,GO:1990712,GO:0036122	cellular iron ion homeostasis|biological_process|cell surface|coreceptor activity|positive regulation of transcription by RNA polymerase II|basolateral plasma membrane|protein autoprocessing|iron ion homeostasis|BMP receptor complex|cellular response to BMP stimulus|plasma membrane protein complex|BMP receptor activity|transferrin receptor binding|negative regulation of transcription by RNA polym…
Hhatl	40.28428504	57.01334997	23.55522011	0.413152711	-1.27525296	0.003211247	0.287783065	Down	0.491761	0.526046	0.524179	0.154938	0.142641	0.355163	GeneID:301073,Genbank:XM_006244091.3,RGD:1311911	hedgehog acyltransferase-like	GO:0060262,GO:0005783,GO:0016021,GO:0048471	negative regulation of N-terminal protein palmitoylation|endoplasmic reticulum|integral component of membrane|perinuclear region of cytoplasm
Hrc	119.2464365	161.3339014	77.15897153	0.478256404	-1.064143808	0.00235907	0.246845727	Down	0.980237	0.822654	0.703882	0.168496	0.427621	0.535897	GeneID:292905,Genbank:NM_181369.2,RGD:727864	histidine rich calcium binding protein	GO:1901844,GO:0044325,GO:0005509,GO:1901899,GO:0045823,GO:1902081,GO:0005575,GO:1903169,GO:0008016,GO:0010460,GO:0010880,GO:0010881,GO:0051117,GO:0016529,GO:0051480,GO:0030018,GO:0051481,GO:0055074,GO:0033017,GO:0002027,GO:0060314,GO:0033135,GO:0003674	regulation of cell communication by electrical coupling involved in cardiac conduction|ion channel binding|calcium ion binding|positive regulation of relaxation of cardiac muscle|positive regulation of heart contraction|negative regulation of calcium ion import into sarcoplasmic reticulum|cellular_component|regulation of calcium ion transmembrane transport|regulation of heart contraction|positive…
Hrh1	37.94111218	19.64342559	56.23879877	2.862983267	1.517519238	0.008260867	0.453742043	Up	0.215716	0.15233	0.0783085	0.4104	0.256251	0.521383	GeneID:24448,Genbank:XM_017592441.1,RGD:2830	histamine receptor H 1	GO:0071420,GO:0045202,GO:0007613,GO:0005829,GO:0045429,GO:0008542,GO:0045907,GO:0005886,GO:0005887,GO:0006954,GO:0007186,GO:0009629,GO:0048167,GO:0010894,GO:0007197,GO:0016021,GO:0007199,GO:0048245,GO:0016907,GO:0007200,GO:0004969,GO:0050804,GO:0019229,GO:0007268,GO:0051381,GO:0043114	cellular response to histamine|synapse|memory|cytosol|positive regulation of nitric oxide biosynthetic process|visual learning|positive regulation of vasoconstriction|plasma membrane|integral component of plasma membrane|inflammatory response|G-protein coupled receptor signaling pathway|response to gravity|regulation of synaptic plasticity|negative regulation of steroid biosynthetic process|adeny…	rno04020,rno04080,rno04750	Calcium signaling pathway|Neuroactive ligand-receptor interaction|Inflammatory mediator regulation of TRP channels
Hsh2d	822.3767278	189.5612248	1455.192231	7.67663446	2.940473953	0.007518629	0.444239471	Up	1.57995	1.02224	1.15767	10.9559	2.35543	13.9831	GeneID:100360518,Genbank:XM_006252795.3,RGD:2321939	hematopoietic SH2 domain containing	GO:0005737,GO:0005739,GO:0005829,GO:0007165,GO:0009967,GO:0035591,GO:0042110,GO:0051902,GO:0002903,GO:0005070	cytoplasm|mitochondrion|cytosol|signal transduction|positive regulation of signal transduction|signaling adaptor activity|T cell activation|negative regulation of mitochondrial depolarization|negative regulation of B cell apoptotic process|SH3/SH2 adaptor activity
Ifi27	5382.979887	2242.954069	8523.005706	3.799902023	1.925962221	0.001708667	0.214387605	Up	85.0234	90.4736	109.652	418	154.783	374.981	GeneID:170512,Genbank:NM_203410.1,RGD:69404	interferon, alpha-inducible protein 27	GO:0097190,GO:0005521,GO:0005575,GO:0005637,GO:0005739,GO:0006919,GO:0016021,GO:0032355,GO:0034097,GO:0046825,GO:0000122,GO:0060135,GO:0001102,GO:0003674	apoptotic signaling pathway|lamin binding|cellular_component|nuclear inner membrane|mitochondrion|activation of cysteine-type endopeptidase activity involved in apoptotic process|integral component of membrane|response to estradiol|response to cytokine|regulation of protein export from nucleus|negative regulation of transcription by RNA polymerase II|maternal process involved in female pregnancy|…
Ifi27l2b	2019.939165	290.9362059	3748.942124	12.8857875	3.687708803	0.040259249	0.827723083	Up	17.9706	20.9419	26.6818	247.204	20.9468	542.646	GeneID:299269,Genbank:NM_206846.2,RGD:1559721	interferon, alpha-inducible protein 27 like 2B	GO:0009615,GO:0016021,GO:0097190,GO:0005739,GO:0006919,GO:0007568	response to virus|integral component of membrane|apoptotic signaling pathway|mitochondrion|activation of cysteine-type endopeptidase activity involved in apoptotic process|aging
Ifi35	1006.930097	483.9343089	1529.925886	3.161432983	1.660578637	0.013235739	0.552127827	Up	7.64258	8.20372	8.6977	29.7604	11.4159	34.8666	GeneID:287719,Genbank:NM_001009625.1,RGD:1304553	interferon-induced protein 35	GO:0005634	nucleus
Ifi44	3839.622778	614.9279862	7064.31757	11.48804043	3.522060827	0.00551554	0.380167816	Up	3.0667	4.06026	3.69786	39.6595	9.8642	64.342	GeneID:310969,Genbank:XM_006233498.2,RGD:1310523	interferon-induced protein 44
Ifi44l	1754.664688	260.3241724	3249.005204	12.48061283	3.64161687	0.003332229	0.291229484	Up	2.44408	2.55644	2.44725	32.0464	7.5515	47.0659	GeneID:310968,Genbank:XM_227820.8,RGD:1595861	interferon-induced protein 44-like	GO:0005525,GO:0006955,GO:0051607	GTP binding|immune response|defense response to virus
Ifi47	3689.532688	562.769809	6816.295568	12.11204912	3.598371056	0.002573565	0.259155209	Up	7.68139	7.59482	8.33916	111.834	21.6248	135.577	GeneID:246208,Genbank:NM_172019.2,RGD:708470	interferon gamma inducible protein 47	GO:0006952,GO:0016020,GO:0035458,GO:0003924,GO:0005525,GO:0005789	defense response|membrane|cellular response to interferon-beta|GTPase activity|GTP binding|endoplasmic reticulum membrane	rno04668	TNF signaling pathway
Ifih1	4615.370653	867.7363673	8363.004939	9.637725528	3.268692715	0.002230425	0.240091185	Up	3.56867	3.99824	4.35794	42.1662	12.1973	58.31	GeneID:499801,Genbank:NM_001109199.1,RGD:1560496	interferon induced with helicase C domain 1	GO:0051607,GO:0005524,GO:0060760,GO:0005737,GO:0071360,GO:0008270,GO:0009615,GO:0016787,GO:0016925,GO:0032727,GO:1902741,GO:0032728,GO:1904469,GO:0035549,GO:2000778,GO:0039530,GO:0042802,GO:0003677,GO:0043021,GO:0003725,GO:0045087,GO:0003727	defense response to virus|ATP binding|positive regulation of response to cytokine stimulus|cytoplasm|cellular response to exogenous dsRNA|zinc ion binding|response to virus|hydrolase activity|protein sumoylation|positive regulation of interferon-alpha production|positive regulation of interferon-alpha secretion|positive regulation of interferon-beta production|positive regulation of tumor necrosi…	rno04622,rno05162,rno05164,rno05161,rno05168	RIG-I-like receptor signaling pathway|Measles|Influenza A|Hepatitis B|Herpes simplex infection
Ifit1	6600.906786	444.7627354	12757.05084	28.68282304	4.84211512	0.000184828	0.065317673	Up	2.8508	6.64486	3.49147	136.781	34.5	185.17	GeneID:56824,Genbank:NM_020096.1,RGD:620599	interferon-induced protein with tetratricopeptide repeats 1	GO:0009615,GO:0035457,GO:0035458,GO:0051607,GO:0003723,GO:0005737,GO:0005829	response to virus|cellular response to interferon-alpha|cellular response to interferon-beta|defense response to virus|RNA binding|cytoplasm|cytosol	rno05160,rno05168	Hepatitis C|Herpes simplex infection
Ifit1bl	4492.292792	542.9255067	8441.660077	15.54846839	3.958700568	0.030500376	0.753697665	Up	1.48851	1.43367	2.46535	22.1824	3.65654	53.1492	GeneID:294090,Genbank:XM_017590343.1,RGD:1304872	interferon-induced protein with tetratricopeptide repeats 1B-like	GO:0003723,GO:0005829,GO:0051607	RNA binding|cytosol|defense response to virus	rno05160,rno05168	Hepatitis C|Herpes simplex infection
Ifit2	17685.74119	960.3528273	34411.12954	35.83175742	5.163166899	0.000834566	0.158655238	Up	4.49123	5.01054	6.18795	189.942	38.8331	303.108	GeneID:294091,Genbank:NM_001024753.1,RGD:1307804	interferon-induced protein with tetratricopeptide repeats 2	GO:0005829,GO:0009615,GO:0032091,GO:0035457,GO:0043065,GO:0051607,GO:0003723,GO:0005737,GO:0005783	cytosol|response to virus|negative regulation of protein binding|cellular response to interferon-alpha|positive regulation of apoptotic process|defense response to virus|RNA binding|cytoplasm|endoplasmic reticulum
Ifit3	10644.10308	290.147484	20998.05867	72.37029381	6.177325724	0.000232132	0.076255623	Up	2.45582	2.64013	4.03389	240.885	35.9742	355.881	GeneID:309526,Genbank:NM_001007694.1,RGD:1359681	interferon-induced protein with tetratricopeptide repeats 3	GO:0005829,GO:0008285,GO:0009615,GO:0035457,GO:0035458,GO:0035634,GO:0042802,GO:0043066,GO:0051607,GO:0003723,GO:0005737,GO:0005739	cytosol|negative regulation of cell proliferation|response to virus|cellular response to interferon-alpha|cellular response to interferon-beta|response to stilbenoid|identical protein binding|negative regulation of apoptotic process|defense response to virus|RNA binding|cytoplasm|mitochondrion
Ifitm3	5106.165125	2105.315217	8107.015034	3.85073692	1.945134562	0.019946591	0.644199836	Up	90.572	99.0641	112.148	447.39	132.522	595.825	GeneID:361673,Genbank:NM_001136124.1,RGD:1595844	interferon induced transmembrane protein 3	GO:0055007,GO:0032897,GO:0005737,GO:0060337,GO:0034341,GO:0005765,GO:0035455,GO:0005783,GO:0005886,GO:0006898,GO:0007507,GO:0035456,GO:0008285,GO:0045071,GO:0009615,GO:0045177,GO:0009986,GO:0046597,GO:0016021,GO:0003674,GO:0051607,GO:0031410,GO:0005575,GO:0031902,GO:0005634	cardiac muscle cell differentiation|negative regulation of viral transcription|cytoplasm|type I interferon signaling pathway|response to interferon-gamma|lysosomal membrane|response to interferon-alpha|endoplasmic reticulum|plasma membrane|receptor-mediated endocytosis|heart development|response to interferon-beta|negative regulation of cell proliferation|negative regulation of viral genome repli…
Igsf1	39.78675109	53.36909794	26.20440425	0.491003319	-1.026195317	0.017589112	0.615228429	Down	0.181328	0.144317	0.212399	0.0402734	0.110774	0.107208	GeneID:302822,Genbank:XM_006257557.2,RGD:631402	immunoglobulin superfamily, member 1	GO:0015026,GO:0016020,GO:0016021,GO:0034711,GO:0038023,GO:0005576,GO:0006355,GO:0007165	coreceptor activity|membrane|integral component of membrane|inhibin binding|signaling receptor activity|extracellular region|regulation of transcription, DNA-templated|signal transduction
Igtp	3115.636978	508.6346341	5722.639321	11.25098241	3.491979075	0.003255572	0.288989844	Up	4.99779	4.21184	4.81798	59.4364	13.1683	77.1563	GeneID:303163,Genbank:XM_006246382.3,RGD:1306896	interferon gamma induced GTPase	GO:0006952,GO:0016021,GO:0035458,GO:0003924,GO:0005525,GO:0005789	defense response|integral component of membrane|cellular response to interferon-beta|GTPase activity|GTP binding|endoplasmic reticulum membrane	rno05145	Toxoplasmosis
Iqcf3	6.159832033	0.327234379	11.99242969	36.64782938	5.195655846	0.007406519	0.442168864	Up	0	0	0	0.111675	0.00844982	0.0930248	GeneID:501050,Genbank:XM_017595850.1,RGD:1565277	IQ motif containing F3	GO:0005516	calmodulin binding
Irf1	3459.600688	1872.306666	5046.894711	2.695549187	1.430579236	0.02452818	0.689573968	Up	17.0463	18.7943	19.8553	49.7515	23.5978	70.6476	GeneID:24508,Genbank:NM_012591.1,RGD:2920	interferon regulatory factor 1	GO:0003700,GO:0005515,GO:0005634,GO:0005737,GO:0010942,GO:0006355,GO:0032481,GO:0006366,GO:0006915,GO:0032728,GO:0034124,GO:0045590,GO:0045892,GO:0035458,GO:0045893,GO:0000790,GO:0071347,GO:0045944,GO:0071356,GO:0000978,GO:0071359,GO:0071375,GO:0001077,GO:2000564,GO:0003677,GO:0007050,GO:0007249,GO:0007565,GO:0008285,GO:0042127,GO:0009408,GO:0042532,GO:0010468,GO:0043374,GO:0043565,GO:0051607,GO:…	DNA binding transcription factor activity|protein binding|nucleus|cytoplasm|positive regulation of cell death|regulation of transcription, DNA-templated|positive regulation of type I interferon production|transcription by RNA polymerase II|apoptotic process|positive regulation of interferon-beta production|regulation of MyD88-dependent toll-like receptor signaling pathway|negative regulation of r…	rno04625,rno04917,rno05133,rno05160,rno05165	C-type lectin receptor signaling pathway|Prolactin signaling pathway|Pertussis|Hepatitis C|Human papillomavirus infection
Irf7	10902.64014	692.7924591	21112.48783	30.47447695	4.929529554	0.001129725	0.17955132	Up	6.72459	6.73966	7.71945	236.744	37.1864	338.742	GeneID:293624,Genbank:XM_006230541.1,RGD:1307828	interferon regulatory factor 7	GO:0032728,GO:0003677,GO:0034124,GO:0005634,GO:0034127,GO:0005654,GO:0005737,GO:0005829,GO:0045351,GO:0006351,GO:0045893,GO:0016064,GO:0045944,GO:0032481,GO:0051607,GO:0032607,GO:0000979,GO:0060340,GO:0032608,GO:0000982,GO:0032727,GO:0002819	positive regulation of interferon-beta production|DNA binding|regulation of MyD88-dependent toll-like receptor signaling pathway|nucleus|regulation of MyD88-independent toll-like receptor signaling pathway|nucleoplasm|cytoplasm|cytosol|type I interferon biosynthetic process|transcription, DNA-templated|positive regulation of transcription, DNA-templated|immunoglobulin mediated immune response|pos…	rno04620,rno04621,rno04622,rno04623,rno05203,rno05162,rno05164,rno05161,rno05160,rno05168,rno05167	Toll-like receptor signaling pathway|NOD-like receptor signaling pathway|RIG-I-like receptor signaling pathway|Cytosolic DNA-sensing pathway|Viral carcinogenesis|Measles|Influenza A|Hepatitis B|Hepatitis C|Herpes simplex infection|Kaposi's sarcoma-associated herpesvirus infection
Irf9	2400.640397	1022.842913	3778.437882	3.694054909	1.885205311	6.98E-05	0.03630015	Up	5.66482	6.38186	6.6817	26.7065	13.1922	26.9554	GeneID:305896,Genbank:NM_001012041.1,RGD:1308766	interferon regulatory factor 9	GO:0005829,GO:0006351,GO:0006355,GO:0045351,GO:0001047,GO:0003700,GO:0005634	cytosol|transcription, DNA-templated|regulation of transcription, DNA-templated|type I interferon biosynthetic process|core promoter binding|DNA binding transcription factor activity|nucleus	rno04630,rno04217,rno04621,rno04625,rno04380,rno05203,rno05162,rno05164,rno05160,rno05168,rno05167,rno05165	Jak-STAT signaling pathway|Necroptosis|NOD-like receptor signaling pathway|C-type lectin receptor signaling pathway|Osteoclast differentiation|Viral carcinogenesis|Measles|Influenza A|Hepatitis C|Herpes simplex infection|Kaposi's sarcoma-associated herpesvirus infection|Human papillomavirus infection
Irgm	2201.142347	567.7268386	3834.557855	6.754230371	2.755791387	0.004950078	0.359757687	Up	4.9684	4.20987	4.06474	31.2768	10.2256	44.1334	GeneID:303090,Genbank:XM_006246179.2,RGD:1305163	immunity-related GTPase M	GO:0005770,GO:0005776,GO:0005789,GO:0005794,GO:0005829,GO:0006952,GO:0045335,GO:0010508,GO:0050700,GO:0010800,GO:0050821,GO:0019901,GO:0050829,GO:0051434,GO:0060335,GO:0061635,GO:0061739,GO:0061762,GO:0070431,GO:0000045,GO:0000139,GO:0000421,GO:0001891,GO:0001934,GO:0003924,GO:0005525,GO:0005739,GO:0005764,GO:0030670,GO:0031648,GO:0033138,GO:0035458,GO:0042742,GO:0042995,GO:0043254,GO:0071222,GO:…	late endosome|autophagosome|endoplasmic reticulum membrane|Golgi apparatus|cytosol|defense response|phagocytic vesicle|positive regulation of autophagy|CARD domain binding|positive regulation of peptidyl-threonine phosphorylation|protein stabilization|protein kinase binding|defense response to Gram-negative bacterium|BH3 domain binding|positive regulation of interferon-gamma-mediated signaling pa…	rno05145	Toxoplasmosis
Irgm2	8723.046439	1516.876286	15929.21659	10.50132878	3.392499985	0.002889009	0.270778685	Up	10.8521	8.69898	8.95182	105.114	28.3996	149.391	GeneID:100362733,Genbank:XM_008767746.2,RGD:2324125	immunity-related GTPase family M member 2
Isg15	3657.578484	79.4253333	7235.731635	91.10105472	6.509395852	0.00015627	0.058538906	Up	1.10951	1.53181	1.74176	151.043	20.7359	219.337	GeneID:298693,Genbank:XM_006239563.3,RGD:1310312	ISG15 ubiquitin-like modifier	GO:0042742,GO:0016567,GO:0045071,GO:0045648,GO:0019941,GO:0030501,GO:0031386,GO:0051607,GO:0031397,GO:0070628,GO:0031625,GO:0032020,GO:0005576,GO:0032649,GO:0005634,GO:0034340,GO:0005737	defense response to bacterium|protein ubiquitination|negative regulation of viral genome replication|positive regulation of erythrocyte differentiation|modification-dependent protein catabolic process|positive regulation of bone mineralization|protein tag|defense response to virus|negative regulation of protein ubiquitination|proteasome binding|ubiquitin protein ligase binding|ISG15-protein conju…	rno04622,rno05165	RIG-I-like receptor signaling pathway|Human papillomavirus infection
Isg20	650.640743	244.6520017	1056.629484	4.318907988	2.110666581	0.045925244	0.882235721	Up	6.96833	8.50442	7.38588	33.0259	7.42502	49.563	GeneID:293052,Genbank:NM_001008510.1,RGD:1306407	interferon stimulated exonuclease gene 20	GO:0090503,GO:0005634,GO:0005730,GO:0005737,GO:0006401,GO:0008310,GO:0009615,GO:0015030,GO:0016605,GO:0030619,GO:0030620,GO:0034511,GO:0000175,GO:0045071,GO:0000738,GO:0051607,GO:0004527	RNA phosphodiester bond hydrolysis, exonucleolytic|nucleus|nucleolus|cytoplasm|RNA catabolic process|single-stranded DNA 3'-5' exodeoxyribonuclease activity|response to virus|Cajal body|PML body|U1 snRNA binding|U2 snRNA binding|U3 snoRNA binding|3'-5'-exoribonuclease activity|negative regulation of viral genome replication|DNA catabolic process, exonucleolytic|defense response to virus|exonuclea…
Itih4	60.33075719	38.89544425	81.76607013	2.102201728	1.071901118	0.003295283	0.289909801	Up	0.295397	0.183835	0.118576	0.266755	0.459001	0.478793	GeneID:54404,Genbank:NM_019369.2,RGD:70881	inter-alpha-trypsin inhibitor heavy chain family, member 4	GO:0005540,GO:0005575,GO:0005737,GO:0005886,GO:0006953,GO:0008150,GO:0010951,GO:0030212,GO:0034097,GO:0003674,GO:0004867,GO:0005509	hyaluronic acid binding|cellular_component|cytoplasm|plasma membrane|acute-phase response|biological_process|negative regulation of endopeptidase activity|hyaluronan metabolic process|response to cytokine|molecular_function|serine-type endopeptidase inhibitor activity|calcium ion binding
Jakmip1	40.57241556	58.39770567	22.74712544	0.389520876	-1.360227446	0.001803482	0.215154305	Down	0.230954	0.188264	0.166487	0.0378651	0.11196	0.0457028	GeneID:305434,Genbank:XM_017599201.1,RGD:1562401	janus kinase and microtubule interacting protein 1	GO:0005874,GO:0008017,GO:0015031,GO:0015630,GO:0019894,GO:0019898,GO:0019900,GO:0050811,GO:0050890,GO:0065007,GO:0003723,GO:0003729,GO:0005737	microtubule|microtubule binding|protein transport|microtubule cytoskeleton|kinesin binding|extrinsic component of membrane|kinase binding|GABA receptor binding|cognition|biological regulation|RNA binding|mRNA binding|cytoplasm
Kcna2	203.8012822	277.0659741	130.5365902	0.471139015	-1.085775287	0.003246053	0.288989844	Down	0.619145	0.493256	0.3743	0.184466	0.309592	0.179812	GeneID:25468,Genbank:XM_006233133.3,RGD:2950	potassium voltage-gated channel subfamily A member 2	GO:0005887,GO:0008076,GO:0014059,GO:0032809,GO:0015271,GO:0016021,GO:0033010,GO:0019228,GO:0034705,GO:0034765,GO:0042734,GO:0043204,GO:0071805,GO:0043679,GO:0005249,GO:0005251,GO:0005515,GO:0005768,GO:0005789,GO:0019233,GO:0019894,GO:0021633,GO:0030027,GO:0030424,GO:0030425,GO:0044224,GO:0031258,GO:0045188,GO:0045202,GO:0051259,GO:0051260	integral component of plasma membrane|voltage-gated potassium channel complex|regulation of dopamine secretion|neuronal cell body membrane|outward rectifier potassium channel activity|integral component of membrane|paranodal junction|neuronal action potential|potassium channel complex|regulation of ion transmembrane transport|presynaptic membrane|perikaryon|potassium ion transmembrane transport|a…
Kcng2	96.07444161	135.2387465	56.91013672	0.420812365	-1.248750999	3.65E-05	0.022400431	Down	0.468634	0.546613	0.491398	0.202826	0.168692	0.254954	GeneID:307234,Genbank:XM_006254947.2,RGD:1309521	potassium voltage-gated channel modifier subfamily G member 2	GO:0016021,GO:0034765,GO:0051260,GO:0071805,GO:0005249,GO:0008076	integral component of membrane|regulation of ion transmembrane transport|protein homooligomerization|potassium ion transmembrane transport|voltage-gated potassium channel activity|voltage-gated potassium channel complex
Kcng4	21.56826946	8.272166463	34.86437246	4.214660405	2.075416391	0.005997364	0.397188346	Up	0.0321158	0.0472117	0.0430349	0.170508	0.0558816	0.248932	GeneID:307900,Genbank:NM_001107435.1,RGD:1308553	potassium voltage-gated channel modifier subfamily G member 4	GO:0005886,GO:0008076,GO:0016021,GO:0034765,GO:0044325,GO:0051260,GO:0071805,GO:0005249,GO:0005251	plasma membrane|voltage-gated potassium channel complex|integral component of membrane|regulation of ion transmembrane transport|ion channel binding|protein homooligomerization|potassium ion transmembrane transport|voltage-gated potassium channel activity|delayed rectifier potassium channel activity
Kcnj11	35.62577808	47.74658413	23.50497203	0.492285939	-1.022431561	0.024663341	0.689573968	Down	0.248477	0.306014	0.268961	0.0678413	0.163941	0.170019	GeneID:83535,Genbank:XM_008759421.2,RGD:69247	potassium voltage-gated channel subfamily J member 11	GO:0005783,GO:0005829,GO:0005886,GO:0006006,GO:0006813,GO:0030506,GO:0008022,GO:0030673,GO:0008282,GO:0031072,GO:0032355,GO:0033198,GO:0033574,GO:0034765,GO:0071333,GO:0042383,GO:0071356,GO:0042391,GO:0071805,GO:0042493,GO:1903078,GO:2001259,GO:0001669,GO:0002931,GO:0005242,GO:0005249,GO:0005515,GO:0005524,GO:0005635,GO:0005739,GO:0005768,GO:0010107,GO:0014704,GO:0015272,GO:0030315,GO:0043025,GO:…	endoplasmic reticulum|cytosol|plasma membrane|glucose metabolic process|potassium ion transport|ankyrin binding|protein C-terminus binding|axolemma|inward rectifying potassium channel|heat shock protein binding|response to estradiol|response to ATP|response to testosterone|regulation of ion transmembrane transport|cellular response to glucose stimulus|sarcolemma|cellular response to tumor necrosi…	rno04911,rno04930	Insulin secretion|Type II diabetes mellitus
Kcnj3	64.59183383	91.92920909	37.25445857	0.405251595	-1.303110232	0.000236136	0.076255623	Down	1.16854	0.975747	1.01835	0.280582	0.513942	0.425092	GeneID:50599,Genbank:NM_031610.3,RGD:2958	potassium voltage-gated channel subfamily J member 3	GO:0005887,GO:0008076,GO:0009897,GO:0009986,GO:0010107,GO:0015467,GO:0030315,GO:0034765,GO:0051602,GO:1990573,GO:0005242,GO:0005515	integral component of plasma membrane|voltage-gated potassium channel complex|external side of plasma membrane|cell surface|potassium ion import|G-protein activated inward rectifier potassium channel activity|T-tubule|regulation of ion transmembrane transport|response to electrical stimulus|potassium ion import across plasma membrane|inward rectifier potassium channel activity|protein binding	rno04915,rno04921,rno04724,rno04725,rno04728,rno04726,rno04723,rno04713,rno05032	Estrogen signaling pathway|Oxytocin signaling pathway|Glutamatergic synapse|Cholinergic synapse|Dopaminergic synapse|Serotonergic synapse|Retrograde endocannabinoid signaling|Circadian entrainment|Morphine addiction
Kcnk2	303.5355268	431.1910497	175.880004	0.407893448	-1.293735762	0.001772717	0.214387605	Down	2.0199	2.3358	2.67857	0.569744	1.7363	0.444537	GeneID:170899,Genbank:XM_006250433.3,RGD:621448	potassium two pore domain channel subfamily K member 2	GO:0005887,GO:0006813,GO:0007186,GO:0007613,GO:0008076,GO:0009612,GO:0009986,GO:0044305,GO:0010942,GO:0048678,GO:0015271,GO:0060044,GO:0071456,GO:0071805,GO:0090102,GO:0097449,GO:1900039,GO:0003231,GO:0005249,GO:0005515,GO:0005634,GO:0005783,GO:0005789,GO:0005886,GO:0016324,GO:0019870,GO:0022841,GO:0030322,GO:0030424,GO:0042391,GO:2000279,GO:0043005,GO:0043025,GO:0043679	integral component of plasma membrane|potassium ion transport|G-protein coupled receptor signaling pathway|memory|voltage-gated potassium channel complex|response to mechanical stimulus|cell surface|calyx of Held|positive regulation of cell death|response to axon injury|outward rectifier potassium channel activity|negative regulation of cardiac muscle cell proliferation|cellular response to hypox…	rno04927,rno04971,rno04934	Cortisol synthesis and secretion|Gastric acid secretion|Cushing's syndrome
Klhl30	34.45027015	46.48128717	22.41925312	0.482328577	-1.051911804	0.02385777	0.683588398	Down	0.541272	0.291321	0.404394	0.176407	0.165019	0.228744	GeneID:316624,Genbank:XM_003750733.3,RGD:1309644	kelch-like family member 30	GO:0016567,GO:0031463,GO:0004842	protein ubiquitination|Cul3-RING ubiquitin ligase complex|ubiquitin-protein transferase activity
Klhl33	51.44582865	75.05599117	27.83566614	0.370865346	-1.431032627	0.000972965	0.164176869	Down	0.410415	0.339813	0.278424	0.0453886	0.192592	0.0985981	GeneID:100362676,Genbank:XM_002728195.5,RGD:2324282	kelch-like family member 33	GO:0004842,GO:0016567,GO:0031463	ubiquitin-protein transferase activity|protein ubiquitination|Cul3-RING ubiquitin ligase complex
Klrk1	496.4477636	279.1246066	713.7709206	2.557176629	1.354551814	0.020831209	0.656849395	Up	1.64218	1.03352	1.36486	2.9816	2.49201	5.4312	GeneID:24934,Genbank:XM_006237077.3,RGD:3180	killer cell lectin like receptor K1	GO:0009986,GO:0016021,GO:0019900,GO:0030101,GO:0030154,GO:0042803,GO:0030246,GO:0030887,GO:0043065,GO:0032394,GO:0045429,GO:0045954,GO:0050830,GO:0002223,GO:0002250,GO:0002860,GO:0005515,GO:0005886,GO:0009897,GO:0032729,GO:0034260,GO:0038023,GO:0042267,GO:0071222,GO:0042288,GO:2000502	cell surface|integral component of membrane|kinase binding|natural killer cell activation|cell differentiation|protein homodimerization activity|carbohydrate binding|positive regulation of myeloid dendritic cell activation|positive regulation of apoptotic process|MHC class Ib receptor activity|positive regulation of nitric oxide biosynthetic process|positive regulation of natural killer cell medi…	rno04650,rno05144	Natural killer cell mediated cytotoxicity|Malaria
Krt13	9.623642207	15.26103356	3.986250848	0.261204514	-1.936748268	0.033819717	0.784483138	Down	0.160658	0.189061	0.0873837	0.0844561	0.0668299	0.0166603	GeneID:287699,Genbank:NM_001004021.1,RGD:1302937	keratin 13	GO:0007010,GO:0009314,GO:0043587,GO:0045095,GO:0045111,GO:0070062,GO:0071300,GO:0003674,GO:0005198,GO:0005575	cytoskeleton organization|response to radiation|tongue morphogenesis|keratin filament|intermediate filament cytoskeleton|extracellular exosome|cellular response to retinoic acid|molecular_function|structural molecule activity|cellular_component	rno04915	Estrogen signaling pathway
Krt2	181.1242696	262.8015602	99.44697889	0.378410915	-1.401974392	0.047657624	0.884665314	Down	1.20342	2.42131	0.976844	0.739009	0.39427	0.597453	GeneID:406228,Genbank:XM_006242436.2,RGD:1303297	keratin 2	GO:0051546,GO:0031424,GO:0003334,GO:0032980,GO:0003674,GO:0005198,GO:0005575,GO:0008092,GO:0008150,GO:0043616,GO:0008544,GO:0018149,GO:0045095,GO:0030280,GO:0001533,GO:0045109	keratinocyte migration|keratinization|keratinocyte development|keratinocyte activation|molecular_function|structural molecule activity|cellular_component|cytoskeletal protein binding|biological_process|keratinocyte proliferation|epidermis development|peptide cross-linking|keratin filament|structural constituent of epidermis|cornified envelope|intermediate filament organization
Krt5	49.44302826	68.46686189	30.41919464	0.444290768	-1.170423932	0.021897983	0.666909317	Down	0.902731	0.470324	1.20375	0.393878	0.372708	0.423527	GeneID:369017,Genbank:NM_183333.1,RGD:727894	keratin 5	GO:0005737,GO:0005882,GO:0008150,GO:0045095,GO:0097110,GO:0003674,GO:0005198	cytoplasm|intermediate filament|biological_process|keratin filament|scaffold protein binding|molecular_function|structural molecule activity
LOC100364500	176.792608	93.85124339	259.7339727	2.767506996	1.468586964	0.022475344	0.668653659	Up	1.11164	0.808195	2.1599	2.92657	5.22657	2.84133	GeneID:100364500,Genbank:XM_006255892.3,RGD:2320860	RT1 class I, locus CE11-like	GO:0042612,GO:0002474,GO:0006955,GO:0016021	MHC class I protein complex|antigen processing and presentation of peptide antigen via MHC class I|immune response|integral component of membrane
LOC100909645	5.514603958	10.68627754	0.342930373	0.032090723	-4.961699895	0.023309938	0.675843859	Down	0.0633206	0.0374738	0	0	0	0	GeneID:100909645,Genbank:XM_017596704.1,RGD:6502816	ankyrin repeat domain-containing protein 24-like
LOC100909830	347.315373	185.6278105	509.0029356	2.74206184	1.455261108	0.016023987	0.595494583	Up	0.448649	0.418217	0.510502	1.45335	0.525453	1.58737	GeneID:100909830,Genbank:XM_008772216.1,RGD:6501731	mRNA-decapping enzyme 2-like	GO:0003723,GO:0030145,GO:0090503	RNA binding|manganese ion binding|RNA phosphodiester bond hydrolysis, exonucleolytic
LOC100910501	32.86220554	4.963016054	60.76139502	12.24283669	3.613865967	0.015030607	0.572312991	Up	0	0	0	0	0	0	GeneID:100910501,Genbank:XM_008761484.2,RGD:6498411	glutamyl aminopeptidase-like
LOC100910885	1806.453993	223.0533457	3389.854641	15.19750636	3.925762718	0.001935919	0.223825745	Up	1.85161	2.26971	2.0645	32.9748	8.43911	49.5288	GeneID:100910885,Genbank:XM_017595388.1,RGD:6496055	apolipoprotein L3-like
LOC100910934	156.9472536	18.70340375	295.1911034	15.78274775	3.980276493	0.016818387	0.605130223	Up	0.167117	0.218554	0.0426894	1.91636	0.612441	2.39742	GeneID:100910934,Genbank:XM_003751792.4,RGD:6495949	interferon-inducible GTPase 1-like
LOC100910979	27.88270207	3.658876046	52.1065281	14.24112964	3.831991683	4.43E-10	2.76E-06	Up	0.139938	0.175508	0.114996	1.89325	1.20263	2.37947	GeneID:100910979,Genbank:XM_006254758.3,RGD:6495625	interferon-inducible GTPase 1-like	GO:0006952,GO:0016020,GO:0035458,GO:0003924,GO:0005525,GO:0005789	defense response|membrane|cellular response to interferon-beta|GTPase activity|GTP binding|endoplasmic reticulum membrane
LOC100911034	48.54676143	85.74918049	11.34434238	0.132296802	-2.918149903	9.25E-07	0.001575386	Down	0.990444	0.602425	1.29391	0.072198	0.0593523	0.118693	GeneID:100911034,Genbank:XM_003749609.2,RGD:6495283	cysteine desulfurase, mitochondrial-like
LOC100911104	5412.916771	1967.157924	8858.675618	4.503286447	2.170978248	0.006667903	0.414916355	Up	48.2185	48.9696	56.3241	251.726	81.2289	293.536	GeneID:100911104,Genbank:XM_003751343.3,RGD:6495044	lymphocyte antigen 6B-like
LOC100911190	3483.312274	321.428146	6645.196402	20.67397173	4.36974367	0.000853171	0.158655238	Up	0.722341	0.773256	0.921705	17.12	3.91668	24.0073	GeneID:100911190,Genbank:XM_017600408.1,RGD:6494112	probable ATP-dependent RNA helicase DDX60-like
LOC100911800	3.824507902	6.990594877	0.658420926	0.094186681	-3.408333135	0.047090674	0.884665314	Down	0.102043	0.0338319	0.0466624	0.0110954	0	0	GeneID:100911800,Genbank:XM_003751931.4,RGD:6490379	HLA class II histocompatibility antigen, DP alpha 1 chain-like
LOC100911867	29.74876324	54.14783961	5.349686868	0.09879779	-3.339377424	0.034254644	0.786564775	Down	0.0213841	0.939151	0.632316	0.0408795	0.0302619	0.0607432	GeneID:100911867,Genbank:XM_017592098.1,RGD:6490002	patatin-like phospholipase domain-containing protein 7-like
LOC100912218	32.30515836	20.85625861	43.7540581	2.097886247	1.068936453	0.048987367	0.89259888	Up	0	0	0	0	0	0	GeneID:100912218,Genbank:XM_003749135.4,RGD:6488464	inositol 1,4,5-trisphosphate receptor-interacting protein-like	GO:0004860,GO:0006469,GO:1902042	protein kinase inhibitor activity|negative regulation of protein kinase activity|negative regulation of extrinsic apoptotic signaling pathway via death domain receptors
LOC100912498	18.9668572	29.26448309	8.669231319	0.296237295	-1.755174812	0.006422768	0.408969373	Down	0.016793	0.0242858	0.041512	0.0476686	0.0392302	0.0235072	GeneID:100912498,Genbank:XM_008768818.2,RGD:6486684	protein FAM131A-like
LOC100912642	23.04690957	14.33862831	31.75519084	2.214660298	1.147085424	0.041704122	0.842630215	Up	0.135856	0.193239	0	0.243131	0.217117	0.316389	GeneID:100912642,Genbank:XM_008763958.2,RGD:6486125	cytochrome P450 2J3-like
LOC100912658	1252.616778	103.135085	2402.098471	23.29079839	4.541688189	0.000853861	0.158655238	Up	1.70218	2.01856	1.71759	46.0376	9.08081	65.5628	GeneID:100912658,Genbank:XM_008771202.2,RGD:6485857	probable ATP-dependent RNA helicase DDX60-like
LOC102550614	22.04056106	12.96724602	31.11387611	2.399420515	1.262686022	0.029465146	0.745507562	Up	0.29667	0.293587	0.0950295	0.569079	0.351534	0.706994	GeneID:102550614,Genbank:XM_017599031.1,RGD:7723311	olfactory receptor 11H6-like
LOC102551518	2085.843036	1138.485636	3033.200436	2.664241287	1.413724746	0.022036962	0.668653659	Up	5.43072	5.19768	5.04422	14.2419	6.70786	19.5345	GeneID:102551518,Genbank:XM_006244700.2,RGD:7638136	uncharacterized LOC102551518
LOC102553150	25.06068798	5.681657361	44.43971859	7.821611858	2.967465945	0.00034764	0.100173892	Up	0.237617	0.0592762	0.020428	0.939023	0.366501	1.00235	GeneID:102553150,Genbank:XM_006255134.3,RGD:7608321	protein NLRC5-like
LOC102554012	7.755812049	1.326554102	14.18507	10.69317111	3.41861785	0.033057103	0.778656891	Up	0	0	0	0.0188376	0.352193	0.2793	GeneID:102554012,Genbank:XM_008762111.2,RGD:7701994	metalloendopeptidase homolog PEX-like
LOC102554096	73.45254679	5.667110509	141.2379831	24.92239791	4.639370979	0.001627364	0.208770683	Up	0.10023	0.123096	0.0232291	1.27714	0.364968	2.73378	GeneID:102554096,Genbank:XM_006250610.3,RGD:7637289	guanylate-binding protein 6-like
LOC102555634	761.619371	67.65165243	1455.58709	21.51591332	4.427332177	0.000663426	0.141617482	Up	0.858419	0.734474	0.698328	15.7258	4.63724	24.3481	GeneID:102555634,Genbank:XM_006246415.3,RGD:7752480	interferon-inducible GTPase 1-like
LOC102556085	20.12517012	9.592272444	30.6580678	3.196121459	1.676322234	0.00647411	0.408969373	Up	0.521428	0.803845	0.741976	1.97	0.974556	1.91596	GeneID:102556085,Genbank:XM_006234890.2,RGD:7516973	sodium/nucleoside cotransporter 2-like
LOC102556096	382.2274058	66.76486616	697.6899454	10.44995647	3.385425028	0.008904973	0.469831389	Up	0.455173	0.233131	0.260893	3.03845	1.12763	4.83411	GeneID:102556096,Genbank:XM_017599004.1,RGD:7636450	pyrin domain-containing protein 3-like
LOC102556157	35.04940407	22.94620504	47.15260309	2.054919452	1.039081845	0.045410898	0.876063256	Up	0.12238	0.142914	0.0610832	0.177963	0.166851	0.176444	GeneID:102556157,Genbank:XM_017589946.1,RGD:7626961	zinc finger protein 91-like
LOC103689934	7.990512863	13.66024917	2.320776557	0.169892696	-2.557304267	0.02001968	0.644330598	Down	0.570652	0.303594	0.139879	0.0544267	0.10762	0	GeneID:103689934,Genbank:XM_003750994.4,RGD:9437153	leucine-rich repeat-containing protein 45-like
LOC103689945	93.38776144	133.0364203	53.73910263	0.403942789	-1.307777119	1.88E-05	0.013454988	Down	0.760612	0.760725	0.681294	0.366206	0.465068	0.45081	GeneID:103689945,Genbank:XM_008770640.2,RGD:9188719	zinc finger SWIM domain-containing protein 8-like	GO:0008270	zinc ion binding
LOC103689994	9.137842475	16.253828	2.021856946	0.124392663	-3.007026703	0.011703836	0.531990991	Down	0.0597672	0.176869	0.0700568	0.00664053	0.0130255	0.0196215	GeneID:103689994,Genbank:XM_003751965.4,RGD:9339057	radial spoke head protein 4 homolog A
LOC103690030	1314.241151	678.4349011	1950.047402	2.874332377	1.523226899	0.014843299	0.572312991	Up	3.24894	4.64884	3.96048	10.1262	4.29721	13.5895	GeneID:103690030,Genbank:XM_006245338.3,RGD:9404516	nuclear autoantigen Sp-100-like
LOC103690031	5212.674811	670.3251253	9755.024498	14.5526762	3.863212581	0.00432355	0.331713952	Up	5.62579	5.69819	5.14947	88.5089	14.7616	126.242	GeneID:103690031,Genbank:XM_017593072.1,RGD:9200675	sterile alpha motif domain-containing protein 9-like
LOC103690059	76.25984406	108.917645	43.60204308	0.400321207	-1.320770052	0.000660117	0.141617482	Down	0.104336	0.150787	0.167948	0.0441142	0.106697	0.0334278	GeneID:103690059,Genbank:XM_008762867.2,RGD:9369725	maltase-glucoamylase, intestinal-like
LOC103690064	138.2726385	69.21240615	207.3328709	2.995602702	1.582846296	0.021341495	0.660704454	Up	0.222226	0.206015	0.292955	0.589474	0.233553	0.820433	GeneID:103690064,Genbank:XM_008772178.1,RGD:9339896	m7GpppN-mRNA hydrolase-like	GO:0003723,GO:0030145,GO:0090503	RNA binding|manganese ion binding|RNA phosphodiester bond hydrolysis, exonucleolytic
LOC103690108	767.0165268	16.1690463	1517.864007	93.87467753	6.552664142	0.00059807	0.135058023	Up	0.117258	0.228733	0.374022	18.9215	24.4501	0.406316	GeneID:103690108,Genbank:XM_008772769.2,RGD:9113230	class I histocompatibility antigen, Non-RT1.A alpha-1 chain-like
LOC103692066	3571.622454	820.0330366	6323.211872	7.710923329	2.946903623	0.007051246	0.43301585	Up	1.66327	1.84114	1.6137	10.8415	2.95829	14.769	GeneID:103692066,Genbank:XM_008762745.2,RGD:9213284	sterile alpha motif domain-containing protein 9-like
LOC103694381	45.98611697	62.25547099	29.71676295	0.477335766	-1.066923655	0.008953666	0.470149676	Down	0.763171	0.936545	1.1159	0.326133	0.30301	0.451492	GeneID:103694381,Genbank:XM_008772776.2,RGD:9083628	lymphotoxin-beta	GO:0010467,GO:0010469,GO:0043588,GO:0045084,GO:0048535,GO:0005125,GO:0005164,GO:0005615	gene expression|regulation of signaling receptor activity|skin development|positive regulation of interleukin-12 biosynthetic process|lymph node development|cytokine activity|tumor necrosis factor receptor binding|extracellular space
LOC108348184	89.36636218	59.34260286	119.3901215	2.011878747	1.008543359	0.014893084	0.572312991	Up	0.290624	0.321539	0.952329	0.762415	0.857449	0.916541	GeneID:108348184,Genbank:XM_017597785.1	pyridoxal-dependent decarboxylase domain-containing protein 1-like
LOC108348241	80.8531497	15.30758953	146.3987099	9.563799029	3.257583814	0.005379338	0.373166696	Up	0.282821	0.171813	0.138881	2.44797	0.531103	3.8225	GeneID:108348241,Genbank:XM_017599896.1	PHD finger protein 11-like
LOC108350249	13.89264004	22.46356829	5.321711793	0.236904116	-2.077624829	0.047249399	0.884665314	Down	0	0.069948	0.0358177	0.0339745	0	0	GeneID:108350249,Genbank:XM_017591423.1	endogenous retrovirus group K member 9 Pol protein-like
LOC500956	715.9153357	363.465629	1068.365042	2.939383967	1.555513828	0.025525893	0.699991347	Up	3.24874	3.57285	3.78017	9.98417	4.71836	14.5186	GeneID:500956,Genbank:XM_008765978.2,RGD:1565995	hypothetical protein LOC500956	GO:0051607,GO:0034341,GO:0005634,GO:0034342,GO:0005654,GO:0005737,GO:0005829,GO:0045071,GO:0034340,GO:0003723	defense response to virus|response to interferon-gamma|nucleus|response to type III interferon|nucleoplasm|cytoplasm|cytosol|negative regulation of viral genome replication|response to type I interferon|RNA binding
LOC501033	50.25626267	78.27448207	22.23804326	0.284103359	-1.815512207	0.03150974	0.758582817	Down	0.122217	0.338351	0.134879	0.0613304	0.0681821	0.0315009	GeneID:501033,Genbank:XM_017596116.1,RGD:1591930	similar to UPF0258 protein KIAA1024
LOC685067	6186.955562	1011.87497	11362.03616	11.22869574	3.489118457	0.008211829	0.453742043	Up	6.19005	5.5508	6.17296	73.4485	12.6951	103.154	GeneID:685067,Genbank:XM_003749409.4,RGD:1583235	similar to guanylate binding protein family, member 6
LOC687532	178.4003364	8.955497436	347.8451753	38.84152475	5.279527931	0.020781497	0.656386909	Up	0.0567621	0.0562011	0.0692354	2.13965	0.161397	5.87095	GeneID:687532,Genbank:XM_017591354.1,RGD:1584233	similar to guanylate binding protein family, member 6
LOC690000	1440.622967	913.9794277	1967.266507	2.152418804	1.105958816	0.047408218	0.884665314	Up	4.50386	3.98081	4.26468	9.17415	4.5036	12.1626	GeneID:690000,Genbank:XM_006228917.3,RGD:1585208	similar to CG3740-PA	GO:0006915,GO:0006979,GO:0031966,GO:0051560,GO:0005739,GO:0005783,GO:0006914	apoptotic process|response to oxidative stress|mitochondrial membrane|mitochondrial calcium ion homeostasis|mitochondrion|endoplasmic reticulum|autophagy
LOC691485	137.5007312	185.6034378	89.3980246	0.481661469	-1.053908575	0.001994368	0.227459413	Down	0.905903	1.19189	1.49215	0.335995	0.5982	0.758409	GeneID:691485,Genbank:XM_006240652.3,RGD:1583888	hypothetical protein LOC691485	GO:0005886,GO:0016021	plasma membrane|integral component of membrane
Lap3	2880.274192	1755.56955	4004.978834	2.281298872	1.189855466	0.047414679	0.884665314	Up	12.8651	14.6256	15.8515	35.9183	14.5705	44.4527	GeneID:289668,Genbank:NM_001011910.1,RGD:1307985	leucine aminopeptidase 3	GO:0005654,GO:0005802,GO:0005829,GO:0006508,GO:0008150,GO:0008233,GO:0008235,GO:0030145,GO:0030496,GO:0003674,GO:0004177,GO:0005575	nucleoplasm|trans-Golgi network|cytosol|proteolysis|biological_process|peptidase activity|metalloexopeptidase activity|manganese ion binding|midbody|molecular_function|aminopeptidase activity|cellular_component	rno00330,rno00480	Arginine and proline metabolism|Glutathione metabolism
Lgals3bp	5091.314307	1544.35879	8638.269824	5.593434557	2.483734419	0.013569149	0.555980207	Up	18.653	14.6353	15.0569	91.2364	27.9631	135.541	GeneID:245955,Genbank:NM_139096.1,RGD:620837	galectin 3 binding protein	GO:0005615,GO:0006898,GO:0007155,GO:0016020,GO:0031012,GO:0005044,GO:0005576,GO:0005578	extracellular space|receptor-mediated endocytosis|cell adhesion|membrane|extracellular matrix|scavenger receptor activity|extracellular region|proteinaceous extracellular matrix
Lgals9	2739.034161	394.6316137	5083.436709	12.88147359	3.687225736	0.002749769	0.265480308	Up	4.89122	4.63848	5.8529	69.3329	16.772	103.723	GeneID:25476,Genbank:NM_012977.1,RGD:3005	galectin 9	GO:0006954,GO:0007565,GO:0010628,GO:0010629,GO:0010819,GO:0010862,GO:0016936,GO:0032760,GO:0019899,GO:0032815,GO:0030246,GO:0032823,GO:0032834,GO:0033081,GO:0034134,GO:0034138,GO:0050718,GO:0034142,GO:0050728,GO:0038066,GO:0051092,GO:0043032,GO:0051353,GO:0060135,GO:0070241,GO:0070371,GO:0001819,GO:1904469,GO:0070374,GO:0002519,GO:2000316,GO:0070555,GO:0005102,GO:2000406,GO:0071346,GO:0005615,GO:…	inflammatory response|female pregnancy|positive regulation of gene expression|negative regulation of gene expression|regulation of T cell chemotaxis|positive regulation of pathway-restricted SMAD protein phosphorylation|galactoside binding|positive regulation of tumor necrosis factor production|enzyme binding|negative regulation of natural killer cell activation|carbohydrate binding|regulation of…
Lpar4	60.80409708	81.87640533	39.73178883	0.485265427	-1.043154015	0.003962825	0.317195324	Down	0.522744	0.574391	0.583943	0.210208	0.362877	0.20085	GeneID:302378,Genbank:NM_001106940.1,RGD:1563686	lysophosphatidic acid receptor 4	GO:0007186,GO:0016604,GO:0035025,GO:0035727,GO:0043231,GO:0051482,GO:0070915,GO:0004930,GO:0005886,GO:0005887	G-protein coupled receptor signaling pathway|nuclear body|positive regulation of Rho protein signal transduction|lysophosphatidic acid binding|intracellular membrane-bounded organelle|positive regulation of cytosolic calcium ion concentration involved in phospholipase C-activating G-protein coupled signaling pathway|lysophosphatidic acid receptor activity|G-protein coupled receptor activity|plasm…	rno04015,rno04072,rno04151,rno04080,rno05200	Rap1 signaling pathway|Phospholipase D signaling pathway|PI3K-Akt signaling pathway|Neuroactive ligand-receptor interaction|Pathways in cancer
Lrrc4	655.6059486	322.8645013	988.3473959	3.061183227	1.6140894	0.001540205	0.201734552	Up	1.8216	2.03661	1.48793	5.42408	3.23426	7.05223	GeneID:641521,Genbank:NM_001037336.1,RGD:1560026	leucine rich repeat containing 4	GO:0016021,GO:0019221,GO:0030054,GO:0043197,GO:0044309,GO:0045202,GO:0045211,GO:0046426,GO:0050807,GO:0050808,GO:0060076,GO:0004860,GO:0097119,GO:0005737,GO:0006469	integral component of membrane|cytokine-mediated signaling pathway|cell junction|dendritic spine|neuron spine|synapse|postsynaptic membrane|negative regulation of JAK-STAT cascade|regulation of synapse organization|synapse organization|excitatory synapse|protein kinase inhibitor activity|postsynaptic density protein 95 clustering|cytoplasm|negative regulation of protein kinase activity	rno04514,rno04360	Cell adhesion molecules (CAMs)|Axon guidance
Ly6e	9275.218433	4595.339948	13955.09692	3.036793159	1.602548647	0.001741449	0.214387605	Up	40.7367	48.4786	52.9351	161.858	75.2241	173.722	GeneID:362934,Genbank:XM_006241762.2,RGD:1565342	lymphocyte antigen 6 complex, locus E	GO:0016021,GO:0030325,GO:0030550,GO:0031225,GO:0033130,GO:0035265,GO:0042415,GO:0048242,GO:0055010,GO:0095500,GO:0001701,GO:2000272,GO:0005886,GO:0016020	integral component of membrane|adrenal gland development|acetylcholine receptor inhibitor activity|anchored component of membrane|acetylcholine receptor binding|organ growth|norepinephrine metabolic process|epinephrine secretion|ventricular cardiac muscle tissue morphogenesis|acetylcholine receptor signaling pathway|in utero embryonic development|negative regulation of signaling receptor activity…
Ly9	68.45072928	93.65653364	43.24492491	0.461739542	-1.11484881	0.008961208	0.470149676	Down	0.71055	0.599765	0.452	0.110303	0.532989	0.217099	GeneID:289227,Genbank:XM_008769732.2,RGD:1308341	lymphocyte antigen 9	GO:0032740,GO:0072540,GO:0005886,GO:0009986,GO:0016021	positive regulation of interleukin-17 production|T-helper 17 cell lineage commitment|plasma membrane|cell surface|integral component of membrane
Lysmd2	414.5379771	261.4337583	567.642196	2.171265867	1.118536392	0.023525165	0.679978915	Up	2.34982	3.20225	3.33837	6.75132	3.51881	8.33398	GeneID:300839,Genbank:XM_006243406.3,RGD:1304585	LysM domain containing 2
MGC105567	806.4815929	75.61435543	1537.34883	20.33144132	4.345640588	0.000631827	0.140852818	Up	0.693847	0.593098	0.721171	14.6881	3.67768	20.7554	GeneID:498873,Genbank:NM_001024284.1,RGD:1565797	similar to cDNA sequence BC023105	GO:0006952,GO:0035458,GO:0003924,GO:0005525,GO:0005789	defense response|cellular response to interferon-beta|GTPase activity|GTP binding|endoplasmic reticulum membrane
MGC108823	1165.753228	151.4945338	2180.011922	14.39003684	3.846998381	2.30E-05	0.015358534	Up	1.96087	2.0509	1.94326	27.7999	12.6995	40.0564	GeneID:307414,Genbank:NM_001012353.1,RGD:1359421	similar to interferon-inducible GTPase	GO:0006952,GO:0035458,GO:0003924,GO:0005525,GO:0005789	defense response|cellular response to interferon-beta|GTPase activity|GTP binding|endoplasmic reticulum membrane
Majin	12.50625522	2.325873824	22.68663661	9.754027228	3.285998	0.002638338	0.261599572	Up	0.0145348	0.0290781	0.014973	0.157218	0	0.211086	GeneID:499306,Genbank:XM_017589575.1,RGD:1563886	membrane anchored junction protein	GO:0005639,GO:0007129,GO:0045141,GO:0070197,GO:0000784,GO:0003677	integral component of nuclear inner membrane|synapsis|meiotic telomere clustering|meiotic attachment of telomere to nuclear envelope|nuclear chromosome, telomeric region|DNA binding
Marf1	167.4030297	269.4545884	65.35147114	0.242532412	-2.043750535	0.036836697	0.802285539	Down	0.956518	0.117735	0.669738	0.0764398	0.199351	0.0729358	GeneID:170946,Genbank:NM_133421.2,RGD:619770	meiosis arrest female 1	GO:0010923,GO:0048477,GO:0003723,GO:0007143,GO:0010468	negative regulation of phosphatase activity|oogenesis|RNA binding|female meiotic nuclear division|regulation of gene expression
Mb	1050.680831	1515.224718	586.1369449	0.386831694	-1.370222091	6.85E-07	0.001575386	Down	39.7241	32.5701	31.1103	6.96592	13.4777	17.0225	GeneID:59108,Genbank:NM_021588.2,RGD:620411	myoglobin	GO:0007507,GO:0009725,GO:0015671,GO:0019825,GO:0020037,GO:0031444,GO:0042542,GO:0043353,GO:0046872,GO:0050873,GO:0001666,GO:0005344,GO:0005515	heart development|response to hormone|oxygen transport|oxygen binding|heme binding|slow-twitch skeletal muscle fiber contraction|response to hydrogen peroxide|enucleate erythrocyte differentiation|metal ion binding|brown fat cell differentiation|response to hypoxia|oxygen carrier activity|protein binding
Mb21d1	142.0738267	45.42236092	238.7252925	5.255677769	2.393876825	0.009976889	0.487121994	Up	0.317188	0.367645	0.358942	2.25057	0.48673	2.40308	GeneID:682147,Genbank:XM_006243439.3,RGD:1586939	Mab-21 domain containing 1	GO:0003682,GO:0003690,GO:0005829,GO:0006974,GO:0009190,GO:0032481,GO:0038001,GO:0051607,GO:0061501,GO:0071360,GO:2000774,GO:0002218,GO:0002230,GO:0003677	chromatin binding|double-stranded DNA binding|cytosol|cellular response to DNA damage stimulus|cyclic nucleotide biosynthetic process|positive regulation of type I interferon production|paracrine signaling|defense response to virus|cyclic-GMP-AMP synthase activity|cellular response to exogenous dsRNA|positive regulation of cellular senescence|activation of innate immune response|positive regulati…	rno04623	Cytosolic DNA-sensing pathway
Mettl11b	21.60762799	31.17676738	12.0384886	0.386136524	-1.372817071	0.019274431	0.63670209	Down	0.23561	0.174738	0.238556	0.0926525	0.0457265	0.114657	GeneID:289167,Genbank:XM_222824.8,RGD:1564106	methyltransferase like 11B	GO:0006480,GO:0008168,GO:0071885,GO:0005634,GO:0005737	N-terminal protein amino acid methylation|methyltransferase activity|N-terminal protein N-methyltransferase activity|nucleus|cytoplasm
Mfsd12	1984.950121	1226.768559	2743.131682	2.236062916	1.160960782	0.017437443	0.613915986	Up	6.7629	7.37214	8.1327	18.6751	8.56569	20.3094	GeneID:362824,Genbank:XM_008765107.2,RGD:1307722	major facilitator superfamily domain containing 12	GO:0001942,GO:0016021,GO:0043473	hair follicle development|integral component of membrane|pigmentation
Mitd1	653.5324513	190.6835527	1116.38135	5.854628437	2.549577613	0.00858065	0.463157274	Up	1.30851	1.54406	1.59055	10.5694	2.59615	13.2965	GeneID:363219,Genbank:XM_006244828.3,RGD:1307700	microtubule interacting and trafficking domain containing 1	GO:0019904,GO:0030496,GO:0031902,GO:0032091,GO:0035091,GO:0039702,GO:0042803,GO:0043231,GO:0071985,GO:0000281,GO:0000920,GO:0019898	protein domain specific binding|midbody|late endosome membrane|negative regulation of protein binding|phosphatidylinositol binding|viral budding via host ESCRT complex|protein homodimerization activity|intracellular membrane-bounded organelle|multivesicular body sorting pathway|mitotic cytokinesis|cell separation after cytokinesis|extrinsic component of membrane
Mlc1	723.9885332	1012.543724	435.4333423	0.430039051	-1.217460421	0.012340751	0.54086438	Down	4.51106	10.3878	9.64637	2.15592	3.75038	3.80476	GeneID:315215,Genbank:NM_001108105.1,RGD:1308552	megalencephalic leukoencephalopathy with subcortical cysts 1	GO:0051259,GO:0032388,GO:0016021,GO:0005764,GO:0055037,GO:0034220,GO:0016192,GO:0005768,GO:0071397,GO:0044877,GO:0016323,GO:0072584,GO:0005769,GO:0005783,GO:0005886,GO:0045121,GO:0016324,GO:0005901,GO:0047484,GO:0030136,GO:0005911,GO:0048471,GO:0031410,GO:0008565,GO:0005216,GO:0015031,GO:0005737	protein complex oligomerization|positive regulation of intracellular transport|integral component of membrane|lysosome|recycling endosome|ion transmembrane transport|vesicle-mediated transport|endosome|cellular response to cholesterol|protein-containing complex binding|basolateral plasma membrane|caveolin-mediated endocytosis|early endosome|endoplasmic reticulum|plasma membrane|membrane raft|apic…
Mlkl	1156.522886	612.7572531	1700.288518	2.774815818	1.472392014	0.02164652	0.66489089	Up	3.43738	3.14384	3.79999	10.2697	4.54941	14.0787	GeneID:690743,Genbank:XM_008772572.2,RGD:1592221	mixed lineage kinase domain-like	GO:0005737,GO:0005886,GO:0006468,GO:0007166,GO:0019901,GO:0042802,GO:0044877,GO:0070207,GO:0070266,GO:0004672,GO:0004871,GO:0005524	cytoplasm|plasma membrane|protein phosphorylation|cell surface receptor signaling pathway|protein kinase binding|identical protein binding|protein-containing complex binding|protein homotrimerization|necroptotic process|protein kinase activity|signal transducer activity|ATP binding	rno04668,rno04217	TNF signaling pathway|Necroptosis
Mnda	670.3065429	283.6200259	1056.99306	3.726792763	1.897934597	0.013563716	0.555980207	Up	2.3016	2.40225	2.2503	8.40172	3.63463	12.3518	GeneID:304988,Genbank:NM_001012029.1,RGD:1306089	myeloid cell nuclear differentiation antigen	GO:0005730,GO:0006357,GO:0006974,GO:0030889,GO:0035457,GO:0035458,GO:0042405,GO:0043065,GO:0045669,GO:0048839,GO:0050853,GO:0003690,GO:0003712,GO:0005654	nucleolus|regulation of transcription by RNA polymerase II|cellular response to DNA damage stimulus|negative regulation of B cell proliferation|cellular response to interferon-alpha|cellular response to interferon-beta|nuclear inclusion body|positive regulation of apoptotic process|positive regulation of osteoblast differentiation|inner ear development|B cell receptor signaling pathway|double-str…
Mov10	1565.434931	780.0972093	2350.772652	3.013435536	1.591409203	0.029493919	0.745507562	Up	2.49467	2.36227	2.66681	7.30835	3.37218	10.8837	GeneID:310756,Genbank:NM_001107711.1,RGD:1598327	Mov10 RISC complex RNA helicase	GO:0005829,GO:0008150,GO:0035195,GO:0035279,GO:0000932,GO:0003674,GO:0005575	cytosol|biological_process|gene silencing by miRNA|mRNA cleavage involved in gene silencing by miRNA|P-body|molecular_function|cellular_component
Mpa2l	1134.917729	124.5365795	2145.298879	17.22625503	4.10653719	0.02391604	0.683588398	Up	0.536767	0.511501	0.410171	7.23959	1.00752	15.9341	GeneID:305139,Genbank:XM_006250609.3,RGD:1561523	macrophage activation 2 like	GO:0003924,GO:0005525	GTPase activity|GTP binding
Ms4a6a	199.9451632	88.509253	311.3810734	3.518062382	1.814781065	0.048054336	0.886045509	Up	0.752962	0.79019	0.788242	2.82984	0.760033	4.39332	GeneID:361735,Genbank:XM_342028.7,RGD:1305800	membrane spanning 4-domains A6A	GO:0016021	integral component of membrane
Mx1	26956.45876	394.547556	53518.36996	135.6449157	7.083691162	0.000326626	0.098672696	Up	1.7658	1.85549	1.7942	281.153	15.5482	421.275	GeneID:24575,Genbank:XM_017597877.1,RGD:3127	myxovirus (influenza virus) resistance 1	GO:0048471,GO:0003924,GO:0051607,GO:0005525,GO:0061025,GO:0005634,GO:0005737,GO:0005789,GO:0008017,GO:0009615,GO:0016020,GO:0031966,GO:0045087,GO:0000266,GO:0003374,GO:0048285	perinuclear region of cytoplasm|GTPase activity|defense response to virus|GTP binding|membrane fusion|nucleus|cytoplasm|endoplasmic reticulum membrane|microtubule binding|response to virus|membrane|mitochondrial membrane|innate immune response|mitochondrial fission|dynamin family protein polymerization involved in mitochondrial fission|organelle fission
Mx2	21848.69555	588.8134104	43108.57769	73.21262886	6.194020623	0.000180316	0.064948465	Up	1.26314	1.77518	1.75105	119.211	22.4932	187.872	GeneID:286918,Genbank:XM_006248150.3,RGD:628821	myxovirus (influenza virus) resistance 2	GO:0051607,GO:0031966,GO:0003924,GO:0061025,GO:0034340,GO:0005525,GO:0070382,GO:0042802,GO:0005634,GO:0005737,GO:0005829,GO:0045071,GO:0008017,GO:0009615,GO:0045087,GO:0048285,GO:0000266,GO:0048471,GO:0016020,GO:0003374,GO:0031965	defense response to virus|mitochondrial membrane|GTPase activity|membrane fusion|response to type I interferon|GTP binding|exocytic vesicle|identical protein binding|nucleus|cytoplasm|cytosol|negative regulation of viral genome replication|microtubule binding|response to virus|innate immune response|organelle fission|mitochondrial fission|perinuclear region of cytoplasm|membrane|dynamin family pr…	rno05162,rno05164,rno05165	Measles|Influenza A|Human papillomavirus infection
Myadml2	15.36460699	22.23880936	8.490404606	0.381783236	-1.389174339	0.043033417	0.854978897	Down	0.405962	0.428476	0.379228	0	0.150988	0.207353	GeneID:303744,Genbank:NM_001128185.1,RGD:1311499	myeloid-associated differentiation marker-like 2	GO:0005737,GO:0016021	cytoplasm|integral component of membrane
Mybpc1	20.76757675	31.17354332	10.36161017	0.332384743	-1.589073935	0.008429029	0.457610765	Down	0.129994	0.0932846	0.100565	0.0318966	0.0403928	0.0225074	GeneID:362867,Genbank:XM_008765246.2,RGD:735102	myosin binding protein C, slow type	GO:0071688,GO:0006936,GO:0097493,GO:1903955,GO:0006941,GO:0007015,GO:0007155,GO:0008307,GO:0017022,GO:0030018,GO:0031430,GO:0032982,GO:0045214,GO:0005859,GO:0051015,GO:0005865,GO:0051371	striated muscle myosin thick filament assembly|muscle contraction|structural molecule activity conferring elasticity|positive regulation of protein targeting to mitochondrion|striated muscle contraction|actin filament organization|cell adhesion|structural constituent of muscle|myosin binding|Z disc|M band|myosin filament|sarcomere organization|muscle myosin complex|actin filament binding|striated…
Mybpc3	717.5479651	1011.461948	423.6339818	0.418833336	-1.255551821	8.84E-06	0.010352885	Down	4.69409	4.03691	4.01813	0.979753	1.5292	2.5083	GeneID:295929,Genbank:XM_006234503.3,RGD:1305950	myosin binding protein C, cardiac	GO:0097512,GO:0045214,GO:0030016,GO:0005859,GO:0046872,GO:0030017,GO:0005863,GO:0051015,GO:0030018,GO:0051371,GO:0005865,GO:0006936,GO:0006941,GO:0006942,GO:0031034,GO:0007015,GO:0055010,GO:0031430,GO:0007155,GO:0060048,GO:0031672,GO:0008016,GO:0032036,GO:0008307,GO:0002027,GO:0071688,GO:0042802,GO:0003007,GO:0097493,GO:0017022,GO:0003674	cardiac myofibril|sarcomere organization|myofibril|muscle myosin complex|metal ion binding|sarcomere|striated muscle myosin thick filament|actin filament binding|Z disc|muscle alpha-actinin binding|striated muscle thin filament|muscle contraction|striated muscle contraction|regulation of striated muscle contraction|myosin filament assembly|actin filament organization|ventricular cardiac muscle ti…	rno05410,rno05414	Hypertrophic cardiomyopathy (HCM)|Dilated cardiomyopathy (DCM)
Myh6	8424.904036	11721.75855	5128.049521	0.437481245	-1.192706927	0.000132612	0.055196161	Down	36.6606	29.9156	28.4673	6.94745	12.072	20.0481	GeneID:29556,Genbank:XM_017599641.1,RGD:62029	myosin heavy chain 6	GO:0002027,GO:0003777,GO:0005515,GO:0005516,GO:0005524,GO:0008016,GO:0008017,GO:0005737,GO:0008217,GO:0005739,GO:0009408,GO:0014898,GO:0030509,GO:0016459,GO:0030898,GO:0016887,GO:0030899,GO:0032982,GO:0042802,GO:0000146,GO:0055010,GO:0042803,GO:0043462,GO:0060048,GO:0001701,GO:0060070,GO:0001725,GO:0060420,GO:0002026,GO:1905243,GO:0005859,GO:0006936,GO:0006941,GO:0007018,GO:0007512,GO:0019901,GO:…	regulation of heart rate|microtubule motor activity|protein binding|calmodulin binding|ATP binding|regulation of heart contraction|microtubule binding|cytoplasm|regulation of blood pressure|mitochondrion|response to heat|cardiac muscle hypertrophy in response to stress|BMP signaling pathway|myosin complex|actin-dependent ATPase activity|ATPase activity|calcium-dependent ATPase activity|myosin fil…	rno04919,rno04260,rno04261,rno05410,rno05414,rno05416	Thyroid hormone signaling pathway|Cardiac muscle contraction|Adrenergic signaling in cardiomyocytes|Hypertrophic cardiomyopathy (HCM)|Dilated cardiomyopathy (DCM)|Viral myocarditis
Myl3	9.760589801	17.81481321	1.706366393	0.095783569	-3.384077995	0.002357077	0.246845727	Down	0.108054	0.158905	0.598379	0	0.025538	0.025528	GeneID:24585,Genbank:XM_006243917.3,RGD:3142	myosin light chain 3	GO:0005509,GO:0006936,GO:0006942,GO:0007519,GO:0016459,GO:0031672,GO:0031674,GO:0055010,GO:0060048,GO:0002026,GO:0003774,GO:0003785	calcium ion binding|muscle contraction|regulation of striated muscle contraction|skeletal muscle tissue development|myosin complex|A band|I band|ventricular cardiac muscle tissue morphogenesis|cardiac muscle contraction|regulation of the force of heart contraction|motor activity|actin monomer binding	rno04371,rno04260,rno04261,rno05410,rno05414	Apelin signaling pathway|Cardiac muscle contraction|Adrenergic signaling in cardiomyocytes|Hypertrophic cardiomyopathy (HCM)|Dilated cardiomyopathy (DCM)
Myl4	731.2659756	1035.20534	427.3266109	0.412794056	-1.276505899	0.000808636	0.157768267	Down	38.648	38.6783	22.0446	9.64964	13.8072	14.9253	GeneID:688228,Genbank:NM_001109495.1,RGD:1591197	myosin, light chain 4	GO:0003785,GO:0005509,GO:0016459,GO:0031672,GO:0032781,GO:0051015,GO:0060048,GO:0002026	actin monomer binding|calcium ion binding|myosin complex|A band|positive regulation of ATPase activity|actin filament binding|cardiac muscle contraction|regulation of the force of heart contraction	rno04371,rno04260,rno04261	Apelin signaling pathway|Cardiac muscle contraction|Adrenergic signaling in cardiomyocytes
Myl7	1871.441498	2562.894047	1179.988949	0.460412692	-1.119000489	0.000926799	0.158655238	Down	90.7624	66.1684	69.3417	20.7489	27.7555	50.9281	GeneID:289759,Genbank:NM_001106017.1,RGD:1308262	myosin light chain 7	GO:0005509,GO:0031672,GO:0043197	calcium ion binding|A band|dendritic spine	rno04510,rno04810,rno04670	Focal adhesion|Regulation of actin cytoskeleton|Leukocyte transendothelial migration
Myom2	567.1360695	855.5976893	278.6744497	0.325707343	-1.618351851	3.71E-15	3.48E-11	Down	2.79909	2.69816	3.14603	0.677423	0.696837	1.29033	GeneID:306616,Genbank:XM_008771360.2,RGD:631437	myomesin 2	GO:0051015,GO:0006936,GO:0051371,GO:0006941,GO:0055003,GO:0007015,GO:0008307,GO:0019900,GO:0030018,GO:0030240,GO:0055008,GO:0030241,GO:0071688,GO:0031430,GO:0097493,GO:0002074,GO:0045214,GO:0005859,GO:0048739,GO:0005865	actin filament binding|muscle contraction|muscle alpha-actinin binding|striated muscle contraction|cardiac myofibril assembly|actin filament organization|structural constituent of muscle|kinase binding|Z disc|skeletal muscle thin filament assembly|cardiac muscle tissue morphogenesis|skeletal muscle myosin thick filament assembly|striated muscle myosin thick filament assembly|M band|structural mol…
Nampt	3988.679287	2393.374384	5583.984191	2.333101009	1.222248769	0.037157313	0.804817857	Up	17.4205	20.7386	19.7649	45.1728	20.8781	60.9094	GeneID:297508,Genbank:NM_177928.3,RGD:631365	nicotinamide phosphoribosyltransferase	GO:0051770,GO:0030054,GO:0005737,GO:0060612,GO:0032922,GO:0007565,GO:0007623,GO:0008144,GO:0008286,GO:0009435,GO:0042802,GO:0042803,GO:0010469,GO:0045944,GO:0014070,GO:0047280,GO:0016607,GO:0004514,GO:0005125,GO:0048661,GO:0005634	positive regulation of nitric-oxide synthase biosynthetic process|cell junction|cytoplasm|adipose tissue development|circadian regulation of gene expression|female pregnancy|circadian rhythm|drug binding|insulin receptor signaling pathway|NAD biosynthetic process|identical protein binding|protein homodimerization activity|regulation of signaling receptor activity|positive regulation of transcript…	rno00760,rno04621	Nicotinate and nicotinamide metabolism|NOD-like receptor signaling pathway
Ngfr	31.14356769	42.55439746	19.73273793	0.4637062	-1.10871708	0.026298532	0.703649223	Down	0.353811	0.229462	0.15697	0.0823121	0.167493	0.0988948	GeneID:24596,Genbank:XM_017597000.1,RGD:3177	nerve growth factor receptor	GO:1902895,GO:1903588,GO:1904646,GO:2000179,GO:2000377,GO:2000463,GO:2001235,GO:0005622,GO:0005634,GO:0005635,GO:0005737,GO:0005739,GO:0006955,GO:0005791,GO:0007165,GO:0005794,GO:0007266,GO:0005886,GO:0007275,GO:0007411,GO:0016021,GO:0007417,GO:0016048,GO:0007623,GO:0016525,GO:0009611,GO:0017137,GO:0019233,GO:0021675,GO:0001540,GO:0033209,GO:0030135,GO:0005031,GO:0034599,GO:0031069,GO:0005035,GO:…	positive regulation of pri-miRNA transcription by RNA polymerase II|negative regulation of blood vessel endothelial cell proliferation involved in sprouting angiogenesis|cellular response to amyloid-beta|positive regulation of neural precursor cell proliferation|regulation of reactive oxygen species metabolic process|positive regulation of excitatory postsynaptic potential|positive regulation of …	rno04014,rno04015,rno04010,rno04151,rno04060,rno04215,rno04722,rno05202	Ras signaling pathway|Rap1 signaling pathway|MAPK signaling pathway|PI3K-Akt signaling pathway|Cytokine-cytokine receptor interaction|Apoptosis - multiple species|Neurotrophin signaling pathway|Transcriptional misregulation in cancers
Nlrc5	2412.969977	410.1669527	4415.773002	10.7657942	3.428382847	0.005856779	0.391822903	Up	0.935513	0.748598	0.606588	9.28809	1.79262	13.0436	GeneID:291861,Genbank:XM_008772331.2,RGD:1309166	NLR family, CARD domain containing 5	GO:0005737,GO:0005813,GO:0005829,GO:0032088,GO:0043549,GO:0045087,GO:0045345,GO:0045944,GO:0051607,GO:0060335,GO:0000979,GO:0060339,GO:0005524,GO:0060340,GO:0005634	cytoplasm|centrosome|cytosol|negative regulation of NF-kappaB transcription factor activity|regulation of kinase activity|innate immune response|positive regulation of MHC class I biosynthetic process|positive regulation of transcription by RNA polymerase II|defense response to virus|positive regulation of interferon-gamma-mediated signaling pathway|RNA polymerase II core promoter sequence-specif…
Nrn1	110.2354462	156.693555	63.7773373	0.407019531	-1.29683007	0.008670946	0.465349041	Down	2.12698	2.74568	4.44127	1.23169	1.85049	0.521778	GeneID:83834,Genbank:NM_053346.1,RGD:621586	neuritin 1	GO:0030054,GO:0032281,GO:0042803,GO:0045202,GO:0046658,GO:0046982,GO:1990138,GO:0005615,GO:0007399	cell junction|AMPA glutamate receptor complex|protein homodimerization activity|synapse|anchored component of plasma membrane|protein heterodimerization activity|neuron projection extension|extracellular space|nervous system development
Nt5c3a	701.6415132	437.4969709	965.7860555	2.207526268	1.142430605	0.044229983	0.868372721	Up	4.67978	4.71273	5.10942	10.9738	4.90053	15.0208	GeneID:312373,Genbank:XM_006236552.3,RGD:1312013	5'-nucleotidase, cytosolic IIIA	GO:0005737,GO:0005783,GO:0008253,GO:0009117,GO:0016311,GO:0016791,GO:0046085,GO:0051607,GO:0000166,GO:0000287,GO:0005575	cytoplasm|endoplasmic reticulum|5'-nucleotidase activity|nucleotide metabolic process|dephosphorylation|phosphatase activity|adenosine metabolic process|defense response to virus|nucleotide binding|magnesium ion binding|cellular_component	rno00230,rno00240,rno00760	Purine metabolism|Pyrimidine metabolism|Nicotinate and nicotinamide metabolism
Oas1a	2029.671169	214.9572686	3844.38507	17.88441533	4.16063105	0.000428535	0.111713418	Up	2.17655	3.13398	3.03375	63.4789	14.3859	78.1387	GeneID:192281,Genbank:XM_006249382.3,RGD:621760	2'-5' oligoadenylate synthetase 1A	GO:0051607,GO:0016779,GO:0005829,GO:0003725,GO:0060700,GO:0035457,GO:0042593,GO:0006006,GO:0045071,GO:0005524,GO:0005634,GO:0006164,GO:0005654,GO:0045087,GO:0006955,GO:0005737,GO:0051259,GO:0009615,GO:0001730,GO:0005739,GO:0016020,GO:0005783	defense response to virus|nucleotidyltransferase activity|cytosol|double-stranded RNA binding|regulation of ribonuclease activity|cellular response to interferon-alpha|glucose homeostasis|glucose metabolic process|negative regulation of viral genome replication|ATP binding|nucleus|purine nucleotide biosynthetic process|nucleoplasm|innate immune response|immune response|cytoplasm|protein complex o…	rno04621,rno05162,rno05164,rno05160,rno05168	NOD-like receptor signaling pathway|Measles|Influenza A|Hepatitis C|Herpes simplex infection
Oas1b	2387.73074	170.1250496	4605.33643	27.07030177	4.758639065	1.28E-05	0.011994117	Up	1.05472	2.10509	1.958	48.6274	18.5734	67.2729	GeneID:246268,Genbank:NM_144752.2,RGD:708393	2-5 oligoadenylate synthetase 1B	GO:0045071,GO:0003725,GO:0045087,GO:0051607,GO:0005524,GO:0005634,GO:0005654,GO:0005789,GO:0005829,GO:0006955,GO:0060700,GO:0009615,GO:0016020,GO:0016021,GO:0001730,GO:0016779	negative regulation of viral genome replication|double-stranded RNA binding|innate immune response|defense response to virus|ATP binding|nucleus|nucleoplasm|endoplasmic reticulum membrane|cytosol|immune response|regulation of ribonuclease activity|response to virus|membrane|integral component of membrane|2'-5'-oligoadenylate synthetase activity|nucleotidyltransferase activity	rno04621,rno05162,rno05164,rno05160,rno05168	NOD-like receptor signaling pathway|Measles|Influenza A|Hepatitis C|Herpes simplex infection
Oas1g	7.116987919	0.332031887	13.90194395	41.86930374	5.387821022	0.000992686	0.166008925	Up	0.0152377	0	0	0.250399	0.0435507	0.0582027	GeneID:100910735,Genbank:XM_003751197.2,RGD:6497100	2'-5' oligoadenylate synthetase 1G	GO:0016021,GO:0016779,GO:0051607,GO:0003725,GO:0005524,GO:0006955	integral component of membrane|nucleotidyltransferase activity|defense response to virus|double-stranded RNA binding|ATP binding|immune response
Oas1i	128.9793055	4.302099175	253.6565119	58.96110284	5.881691604	0.014882813	0.572312991	Up	0.0461573	0.0754065	0.0468498	7.0467	0.117069	1.77327	GeneID:304507,Genbank:NM_001009680.1,RGD:1359379	2 ' -5 ' oligoadenylate synthetase 1I	GO:0005524,GO:0005634,GO:0005654,GO:0005829,GO:0006955,GO:0016020,GO:0016021,GO:0016779,GO:0045071,GO:0051607,GO:0001730,GO:0060700,GO:0003725	ATP binding|nucleus|nucleoplasm|cytosol|immune response|membrane|integral component of membrane|nucleotidyltransferase activity|negative regulation of viral genome replication|defense response to virus|2'-5'-oligoadenylate synthetase activity|regulation of ribonuclease activity|double-stranded RNA binding
Oas2	1043.800402	84.85037695	2002.750427	23.60331797	4.560917772	1.15E-05	0.011374059	Up	0.623967	0.596383	0.701598	18.4041	5.43668	20.6419	GeneID:363938,Genbank:NM_001009715.1,RGD:1359697	2'-5' oligoadenylate synthetase 2	GO:0005524,GO:0005634,GO:0005654,GO:0048471,GO:0005737,GO:0005739,GO:0005783,GO:0051607,GO:0060337,GO:0060700,GO:0001730,GO:0003725,GO:0005829,GO:0006401,GO:0006955,GO:0009615,GO:0016020,GO:1903487,GO:0016779,GO:0043231,GO:0045071	ATP binding|nucleus|nucleoplasm|perinuclear region of cytoplasm|cytoplasm|mitochondrion|endoplasmic reticulum|defense response to virus|type I interferon signaling pathway|regulation of ribonuclease activity|2'-5'-oligoadenylate synthetase activity|double-stranded RNA binding|cytosol|RNA catabolic process|immune response|response to virus|membrane|regulation of lactation|nucleotidyltransferase ac…	rno04621,rno05162,rno05164,rno05160,rno05168	NOD-like receptor signaling pathway|Measles|Influenza A|Hepatitis C|Herpes simplex infection
Oas3	588.2503018	62.60047629	1113.900127	17.79379637	4.153302442	0.003509604	0.295163279	Up	0.361806	0.32957	0.517746	7.0108	1.48819	11.5484	GeneID:494202,Genbank:NM_001009493.1,RGD:1359319	2'-5'-oligoadenylate synthetase 3	GO:0051607,GO:0009615,GO:0005737,GO:0001730,GO:0060700,GO:0016020,GO:0003725,GO:0045071,GO:0005829,GO:0005524,GO:0005634,GO:0045087,GO:0005886,GO:0046872,GO:0005654,GO:0006955	defense response to virus|response to virus|cytoplasm|2'-5'-oligoadenylate synthetase activity|regulation of ribonuclease activity|membrane|double-stranded RNA binding|negative regulation of viral genome replication|cytosol|ATP binding|nucleus|innate immune response|plasma membrane|metal ion binding|nucleoplasm|immune response	rno04621,rno05162,rno05164,rno05160,rno05168	NOD-like receptor signaling pathway|Measles|Influenza A|Hepatitis C|Herpes simplex infection
Oasl	1886.796383	81.48956442	3692.103201	45.30768114	5.50168375	0.0007492	0.150887206	Up	0.545861	0.82122	0.646512	29.8404	6.15594	51.053	GeneID:304545,Genbank:NM_001009681.1,RGD:1308586	2'-5'-oligoadenylate synthetase-like	GO:0045087,GO:0005737,GO:0003677,GO:0051607,GO:0005829,GO:0003725,GO:0060700,GO:0005524,GO:0005634,GO:0005654,GO:0009615,GO:0016020,GO:0005730,GO:0001730,GO:0045071	innate immune response|cytoplasm|DNA binding|defense response to virus|cytosol|double-stranded RNA binding|regulation of ribonuclease activity|ATP binding|nucleus|nucleoplasm|response to virus|membrane|nucleolus|2'-5'-oligoadenylate synthetase activity|negative regulation of viral genome replication	rno05165	Human papillomavirus infection
Oasl2	4873.590759	534.5884242	9212.593093	17.23305758	4.107106789	0.002835444	0.269583115	Up	2.96298	3.89991	3.52461	55.5843	16.3653	96.0985	GeneID:304549,Genbank:XM_008769327.2,RGD:1307351	2'-5' oligoadenylate synthetase-like 2	GO:0051607,GO:0003725,GO:0060700,GO:0005524,GO:0005634,GO:0005654,GO:0005829,GO:0006955,GO:0009615,GO:0016020,GO:0016740,GO:0045071,GO:0001730,GO:0045087,GO:0046872	defense response to virus|double-stranded RNA binding|regulation of ribonuclease activity|ATP binding|nucleus|nucleoplasm|cytosol|immune response|response to virus|membrane|transferase activity|negative regulation of viral genome replication|2'-5'-oligoadenylate synthetase activity|innate immune response|metal ion binding	rno05165	Human papillomavirus infection
Ogfr	2369.256578	1055.722523	3682.790633	3.488407752	1.802568683	0.006136498	0.399327651	Up	9.70947	9.37056	9.97407	36.2869	15.1142	43.9562	GeneID:83525,Genbank:NM_053340.2,RGD:69324	opioid growth factor receptor	GO:0040008,GO:0048471,GO:0005634,GO:0016020,GO:0038023	regulation of growth|perinuclear region of cytoplasm|nucleus|membrane|signaling receptor activity
Olr1584	232.9548626	138.5448265	327.3648988	2.362880715	1.2405468	7.36E-05	0.037256867	Up	0.249124	0.234592	0.133243	0.364564	0.474068	0.592427	GeneID:289247,Genbank:XM_017598716.1,RGD:1334087	olfactory receptor 1584	GO:0007186,GO:0016021,GO:0050911,GO:0004888,GO:0004984	G-protein coupled receptor signaling pathway|integral component of membrane|detection of chemical stimulus involved in sensory perception of smell|transmembrane signaling receptor activity|olfactory receptor activity	rno04740	Olfactory transduction
Olr1587	15.84912915	7.665827118	24.03243118	3.13500824	1.648469235	0.016849292	0.605130223	Up	0.302202	0.0832469	0	0.776487	0.60573	0.524847	GeneID:405224,Genbank:NM_001000913.1,RGD:1334407	olfactory receptor 1587	GO:0005886,GO:0007186,GO:0016021,GO:0050907,GO:0050911,GO:0004888,GO:0004930,GO:0004984	plasma membrane|G-protein coupled receptor signaling pathway|integral component of membrane|detection of chemical stimulus involved in sensory perception|detection of chemical stimulus involved in sensory perception of smell|transmembrane signaling receptor activity|G-protein coupled receptor activity|olfactory receptor activity
Osmr	1924.871815	823.9179069	3025.825723	3.672484477	1.876756393	0.049516578	0.895166142	Up	2.02307	1.81607	2.31117	7.06325	2.377	11.7808	GeneID:310132,Genbank:XM_006232012.3,RGD:1302983	oncostatin M receptor	GO:0034097,GO:0004924,GO:0038165,GO:0005900,GO:0008284,GO:0009897,GO:0016021,GO:0016324,GO:0019221,GO:0019838,GO:0004896,GO:0019955	response to cytokine|oncostatin-M receptor activity|oncostatin-M-mediated signaling pathway|oncostatin-M receptor complex|positive regulation of cell proliferation|external side of plasma membrane|integral component of membrane|apical plasma membrane|cytokine-mediated signaling pathway|growth factor binding|cytokine receptor activity|cytokine binding	rno04630,rno04151,rno04060	Jak-STAT signaling pathway|PI3K-Akt signaling pathway|Cytokine-cytokine receptor interaction
Otop1	22.01138504	32.02517358	11.9975965	0.374630179	-1.416460973	0.039196575	0.816117439	Down	0.221844	0.529039	0.797049	0.228705	0.0808547	0.210027	GeneID:305427,Genbank:NM_181433.1,RGD:631389	otopetrin 1	GO:0016021,GO:0031214,GO:0042472,GO:0005615,GO:0009590,GO:0016020	integral component of membrane|biomineral tissue development|inner ear morphogenesis|extracellular space|detection of gravity|membrane
Papd7	1863.404574	1133.658062	2593.151085	2.287419083	1.193720709	0.009988173	0.487121994	Up	3.23422	3.45204	3.39476	8.03451	4.34736	9.69083	GeneID:306672,Genbank:XM_006227782.3,RGD:1307356	PAP associated domain containing 7	GO:0005794,GO:0016779,GO:0031965,GO:0042493,GO:0005634,GO:0005654	Golgi apparatus|nucleotidyltransferase activity|nuclear membrane|response to drug|nucleus|nucleoplasm	rno03018	RNA degradation
Parp10	1707.96938	992.4790552	2423.459705	2.441824533	1.287959533	0.027809297	0.725443071	Up	6.56093	6.18776	6.39776	16.0943	7.17737	21.1558	GeneID:102548778,Genbank:XM_006241910.3,RGD:7744876	poly (ADP-ribose) polymerase family, member 10	GO:0070213,GO:0005730,GO:0070530,GO:0005737,GO:1900045,GO:0005829,GO:0006471,GO:0010629,GO:0010847,GO:0032088,GO:0033159,GO:0043231,GO:0045071,GO:0003950,GO:0048147,GO:0005634,GO:0070212	protein auto-ADP-ribosylation|nucleolus|K63-linked polyubiquitin modification-dependent protein binding|cytoplasm|negative regulation of protein K63-linked ubiquitination|cytosol|protein ADP-ribosylation|negative regulation of gene expression|regulation of chromatin assembly|negative regulation of NF-kappaB transcription factor activity|negative regulation of protein import into nucleus, transloc…
Parp12	2651.5988	742.5179525	4560.679647	6.142180983	2.618751023	0.001642348	0.209259714	Up	3.3369	3.66901	4.05493	22.8613	9.29092	30.4104	GeneID:362343,Genbank:XM_006236346.3,RGD:1308628	poly (ADP-ribose) polymerase family, member 12	GO:0003950,GO:0046872	NAD+ ADP-ribosyltransferase activity|metal ion binding
Parp14	11930.11703	3200.584225	20659.64983	6.454962087	2.690408622	0.000872544	0.158655238	Up	8.17304	8.88478	9.23217	59.27	24.1474	77.6935	GeneID:303903,Genbank:NM_001191659.1,RGD:1310490	poly (ADP-ribose) polymerase family, member 14	GO:0005829,GO:0006471,GO:0010629,GO:0019899,GO:0042531,GO:0042532,GO:0060336,GO:0070212,GO:0070403,GO:1902216,GO:0003950,GO:0005737	cytosol|protein ADP-ribosylation|negative regulation of gene expression|enzyme binding|positive regulation of tyrosine phosphorylation of STAT protein|negative regulation of tyrosine phosphorylation of STAT protein|negative regulation of interferon-gamma-mediated signaling pathway|protein poly-ADP-ribosylation|NAD+ binding|positive regulation of interleukin-4-mediated signaling pathway|NAD+ ADP-r…
Parp9	5665.834064	1736.592744	9595.075384	5.525230608	2.46603468	0.001169623	0.182409787	Up	7.3957	8.26368	7.25002	45.1052	18.1162	58.4691	GeneID:303905,Genbank:XM_017597995.1,RGD:1307534	poly (ADP-ribose) polymerase family, member 9	GO:0097677,GO:0043086,GO:0006471,GO:0003950,GO:1900182,GO:0044389,GO:0010608,GO:2001034,GO:0045893,GO:0010629,GO:0004857,GO:0060330,GO:0005634,GO:0005654,GO:0019899,GO:0005737,GO:0060335,GO:0032991,GO:0005739,GO:0070212,GO:0070403,GO:0035563,GO:0005829,GO:0000122,GO:0072570,GO:0042393,GO:0001191,GO:0090734,GO:0042531,GO:0006302,GO:0002230	STAT family protein binding|negative regulation of catalytic activity|protein ADP-ribosylation|NAD+ ADP-ribosyltransferase activity|positive regulation of protein localization to nucleus|ubiquitin-like protein ligase binding|posttranscriptional regulation of gene expression|positive regulation of double-strand break repair via nonhomologous end joining|positive regulation of transcription, DNA-te…
Pax5	61.45508589	82.98015977	39.93001202	0.481199508	-1.055292929	0.035811473	0.800661775	Down	1.28047	0.858396	0.994812	0.203618	1.0979	0.279239	GeneID:500453,Genbank:NM_001109261.1,RGD:1565236	paired box 5	GO:0045944,GO:0001650,GO:0048701,GO:0003677,GO:0051573,GO:0003700,GO:0005634,GO:0005654,GO:0005829,GO:0006355,GO:0007568,GO:0021670,GO:0021987,GO:0030534,GO:0000122,GO:0035914,GO:0000978,GO:0043231,GO:0001077	positive regulation of transcription by RNA polymerase II|fibrillar center|embryonic cranial skeleton morphogenesis|DNA binding|negative regulation of histone H3-K9 methylation|DNA binding transcription factor activity|nucleus|nucleoplasm|cytosol|regulation of transcription, DNA-templated|aging|lateral ventricle development|cerebral cortex development|adult behavior|negative regulation of transcr…	rno05202	Transcriptional misregulation in cancers
Pddc1	46.51789156	81.70284487	11.33293825	0.138709224	-2.849864362	0.02482805	0.689954553	Down	2.9937	2.57295	0.372776	0.465501	0.486974	0.269444	GeneID:309110,Genbank:XM_017589232.1,RGD:1304836	Parkinson disease 7 domain containing 1
Pdia5	180.7402546	248.4211446	113.0593646	0.45511168	-1.135707481	0.036337487	0.802285539	Down	1.29238	3.04966	3.18883	0.350559	1.78482	0.882789	GeneID:360722,Genbank:NM_001014125.1,RGD:1359236	protein disulfide isomerase family A, member 5	GO:0006457,GO:0015037,GO:0034976,GO:0045454,GO:0055114,GO:0003756,GO:0005783,GO:0005788	protein folding|peptide disulfide oxidoreductase activity|response to endoplasmic reticulum stress|cell redox homeostasis|oxidation-reduction process|protein disulfide isomerase activity|endoplasmic reticulum|endoplasmic reticulum lumen
Pgam2	83.73003606	113.0791195	54.38095261	0.480910648	-1.056159226	0.00082893	0.158655238	Down	4.17195	2.86647	3.73645	1.00065	2.25358	1.84217	GeneID:24959,Genbank:NM_017328.2,RGD:3313	phosphoglycerate mutase 2	GO:0046538,GO:0005634,GO:0005829,GO:0046689,GO:0006094,GO:0006096,GO:0048037,GO:0006941,GO:0007219,GO:0007283,GO:0010035,GO:0004082,GO:0016787,GO:0004619,GO:0043456	2,3-bisphosphoglycerate-dependent phosphoglycerate mutase activity|nucleus|cytosol|response to mercury ion|gluconeogenesis|glycolytic process|cofactor binding|striated muscle contraction|Notch signaling pathway|spermatogenesis|response to inorganic substance|bisphosphoglycerate mutase activity|hydrolase activity|phosphoglycerate mutase activity|regulation of pentose-phosphate shunt	rno00010,rno00260,rno04922,rno05230	Glycolysis / Gluconeogenesis|Glycine, serine and threonine metabolism|Glucagon signaling pathway|Central carbon metabolism in cancer
Phf11	1466.766412	204.8838544	2728.648969	13.31802829	3.735308605	0.011325707	0.528790013	Up	1.37204	1.51275	0.858291	22.7931	2.34469	34.2817	GeneID:361051,Genbank:XM_017599895.1,RGD:1310853	PHD finger protein 11	GO:0006355,GO:0031965,GO:0046872,GO:0005634,GO:0005654,GO:0006351	regulation of transcription, DNA-templated|nuclear membrane|metal ion binding|nucleus|nucleoplasm|transcription, DNA-templated
Piwil4	39.43520609	53.09125777	25.77915442	0.485563076	-1.042269378	0.017023599	0.605130223	Down	0.256718	0.330145	0.212538	0.1083	0.180375	0.113422	GeneID:689972,Genbank:NM_001271133.1,RGD:1311015	piwi-like RNA-mediated gene silencing 4	GO:0051321,GO:0031047,GO:0005634,GO:0071547,GO:0034584,GO:0005737,GO:0006417,GO:0007275,GO:0007283,GO:0034587,GO:0010529,GO:0043046,GO:0030154,GO:0003676,GO:0043186,GO:0004521	meiotic cell cycle|gene silencing by RNA|nucleus|piP-body|piRNA binding|cytoplasm|regulation of translation|multicellular organism development|spermatogenesis|piRNA metabolic process|negative regulation of transposition|DNA methylation involved in gamete generation|cell differentiation|nucleic acid binding|P granule|endoribonuclease activity
Plscr2	1462.69746	860.3075794	2065.087341	2.400405844	1.263278347	0.008699452	0.465544947	Up	8.8718	11.9321	14.027	23.0518	18.8694	36.0247	GeneID:315883,Genbank:XM_017595672.1,RGD:1359107	phospholipid scramblase 2	GO:0005634,GO:0005737,GO:0071222	nucleus|cytoplasm|cellular response to lipopolysaccharide
Pml	4466.93162	1415.80201	7518.06123	5.310107753	2.408741137	0.000803548	0.157768267	Up	6.22935	6.20614	6.74689	36.3189	15.6799	45.1937	GeneID:315713,Genbank:XM_008766431.1,RGD:1562602	promyelocytic leukemia	GO:0005634,GO:0005654,GO:0005730,GO:0005737,GO:0005829,GO:0006355,GO:0006605,GO:0009411,GO:0006606,GO:0010332,GO:0006915,GO:0010522,GO:0006919,GO:0010761,GO:0016363,GO:0016525,GO:0016605,GO:0032938,GO:0034097,GO:0030099,GO:0042406,GO:0030155,GO:0042752,GO:0042771,GO:0042803,GO:0043153,GO:0000784,GO:0050713,GO:0043161,GO:0000792,GO:0050821,GO:0045087,GO:0001666,GO:0050897,GO:0045165,GO:0001932,GO:…	nucleus|nucleoplasm|nucleolus|cytoplasm|cytosol|regulation of transcription, DNA-templated|protein targeting|response to UV|protein import into nucleus|response to gamma radiation|apoptotic process|regulation of calcium ion transport into cytosol|activation of cysteine-type endopeptidase activity involved in apoptotic process|fibroblast migration|nuclear matrix|negative regulation of angiogenesis…	rno04120,rno04144,rno05200,rno05202,rno05221,rno05164,rno05168	Ubiquitin mediated proteolysis|Endocytosis|Pathways in cancer|Transcriptional misregulation in cancers|Acute myeloid leukemia|Influenza A|Herpes simplex infection
Pnpla3	179.2276301	277.6315145	80.82374577	0.291118773	-1.780320221	0.013079162	0.549266139	Down	0.725448	1.84652	2.60017	0.630482	0.336939	0.479422	GeneID:362972,Genbank:XM_017594995.1,RGD:1595843	patatin-like phospholipase domain containing 3	GO:0034389,GO:0004623,GO:0035727,GO:0004806,GO:0036042,GO:0005737,GO:0005811,GO:0006650,GO:0036153,GO:0006654,GO:0042171,GO:0016020,GO:0051264,GO:0051265,GO:0019432,GO:0001676,GO:0055088,GO:0019433,GO:0002021,GO:0003824	lipid particle organization|phospholipase A2 activity|lysophosphatidic acid binding|triglyceride lipase activity|long-chain fatty acyl-CoA binding|cytoplasm|lipid droplet|glycerophospholipid metabolic process|triglyceride acyl-chain remodeling|phosphatidic acid biosynthetic process|lysophosphatidic acid acyltransferase activity|membrane|mono-olein transacylation activity|diolein transacylation ac…	rno00561	Glycerolipid metabolism
Pnpt1	1696.634249	909.849963	2483.418535	2.729481383	1.448626857	0.019337149	0.637649292	Up	4.73982	5.05129	5.5755	14.6485	6.18583	18.6558	GeneID:360992,Genbank:NM_001142371.1,RGD:1307987	polyribonucleotide nucleotidyltransferase 1	GO:0000965,GO:0004654,GO:0005634,GO:0005737,GO:0035198,GO:0005739,GO:0035458,GO:0035927,GO:0005758,GO:0035928,GO:0042788,GO:0043457,GO:0043631,GO:0097421,GO:0045025,GO:2000627,GO:0045926,GO:2000772,GO:0051260,GO:0000175,GO:0000957,GO:0000958,GO:0000962,GO:0000963,GO:0000964,GO:0005789,GO:0005829,GO:0006401,GO:0006402,GO:0051591,GO:0008266,GO:0060416,GO:0034046,GO:0061014,GO:0034599,GO:0070207,GO:…	mitochondrial RNA 3'-end processing|polyribonucleotide nucleotidyltransferase activity|nucleus|cytoplasm|miRNA binding|mitochondrion|cellular response to interferon-beta|RNA import into mitochondrion|mitochondrial intermembrane space|rRNA import into mitochondrion|polysomal ribosome|regulation of cellular respiration|RNA polyadenylation|liver regeneration|mitochondrial degradosome|positive regula…	rno00230,rno00240,rno03018	Purine metabolism|Pyrimidine metabolism|RNA degradation
Podnl1	14.80003661	21.92132433	7.678748896	0.350286725	-1.513391782	0.034171665	0.786564775	Down	0.272196	0.153066	0.155425	0.0826783	0.095567	0.0678555	GeneID:288907,Genbank:XM_213845.8,RGD:1307753	podocan-like 1	GO:0019221,GO:0031012,GO:0046426,GO:0004860,GO:0005737,GO:0006469	cytokine-mediated signaling pathway|extracellular matrix|negative regulation of JAK-STAT cascade|protein kinase inhibitor activity|cytoplasm|negative regulation of protein kinase activity
Psmb10	1187.306349	592.0970462	1782.515651	3.010512656	1.590009183	0.027158213	0.717400362	Up	14.645	14.3587	15.491	47.1871	20.1205	65.1325	GeneID:291983,Genbank:NM_001025637.1,RGD:1307428	proteasome subunit beta 10	GO:1990111,GO:0005634,GO:0005737,GO:0005839,GO:0010498,GO:0010499,GO:0042098,GO:0043161,GO:0000902,GO:0051603,GO:0004175,GO:0004298	spermatoproteasome complex|nucleus|cytoplasm|proteasome core complex|proteasomal protein catabolic process|proteasomal ubiquitin-independent protein catabolic process|T cell proliferation|proteasome-mediated ubiquitin-dependent protein catabolic process|cell morphogenesis|proteolysis involved in cellular protein catabolic process|endopeptidase activity|threonine-type endopeptidase activity	rno03050	Proteasome
Psmb9	1179.855438	512.4793489	1847.231528	3.604499444	1.849798927	0.013666695	0.555980207	Up	14.4739	12.641	14.3539	55.9426	18.2731	69.6985	GeneID:24967,Genbank:NM_012708.2,RGD:3427	proteasome subunit beta 9	GO:0070628,GO:0014889,GO:0004175,GO:0071257,GO:0019774,GO:0004298,GO:0071347,GO:0019882,GO:0005634,GO:0098586,GO:0005737,GO:0005829,GO:0042493,GO:1901423,GO:0043161,GO:0005839,GO:1990111,GO:0043279,GO:0048536,GO:0000502,GO:2000116,GO:0048538,GO:0010498,GO:0001889,GO:0051603,GO:0010499,GO:0002376	proteasome binding|muscle atrophy|endopeptidase activity|cellular response to electrical stimulus|proteasome core complex, beta-subunit complex|threonine-type endopeptidase activity|cellular response to interleukin-1|antigen processing and presentation|nucleus|cellular response to virus|cytoplasm|cytosol|response to drug|response to benzene|proteasome-mediated ubiquitin-dependent protein cataboli…	rno03050	Proteasome
Psme1	3507.724848	2318.868213	4696.581484	2.025376629	1.01819021	0.030123044	0.753697665	Up	48.6024	50.0502	54.3131	92.866	60.164	132.11	GeneID:29630,Genbank:NM_017264.3,RGD:3429	proteasome activator subunit 1	GO:0008537,GO:0010950,GO:0019884,GO:0061133,GO:0061136,GO:2000045,GO:0000502,GO:0005654,GO:0005737	proteasome activator complex|positive regulation of endopeptidase activity|antigen processing and presentation of exogenous antigen|endopeptidase activator activity|regulation of proteasomal protein catabolic process|regulation of G1/S transition of mitotic cell cycle|proteasome complex|nucleoplasm|cytoplasm	rno03050,rno04612	Proteasome|Antigen processing and presentation
Psme2	1459.645507	786.1713076	2133.119706	2.713301396	1.440049312	0.038066373	0.811286735	Up	7.714	8.77905	9.26335	22.6274	10.7891	33.0097	GeneID:29614,Genbank:NM_017257.2,RGD:3430	proteasome (prosome, macropain) activator subunit 2	GO:0008537,GO:0010950,GO:0019884,GO:0042802,GO:0061133,GO:0061136,GO:2000045,GO:0000502,GO:0005654,GO:0005737	proteasome activator complex|positive regulation of endopeptidase activity|antigen processing and presentation of exogenous antigen|identical protein binding|endopeptidase activator activity|regulation of proteasomal protein catabolic process|regulation of G1/S transition of mitotic cell cycle|proteasome complex|nucleoplasm|cytoplasm	rno03050,rno04612	Proteasome|Antigen processing and presentation
Ptpn22	197.1672846	263.3221315	131.0124376	0.49753675	-1.007125001	0.009094206	0.474469284	Down	0.846282	0.943246	0.925458	0.232123	0.769844	0.261778	GeneID:295338,Genbank:NM_001106460.1,RGD:1307992	protein tyrosine phosphatase, non-receptor type 22	GO:0006470,GO:0009898,GO:0010507,GO:0010628,GO:0010629,GO:0016791,GO:0034145,GO:0017124,GO:0034157,GO:0034165,GO:0019900,GO:0035335,GO:0035549,GO:0035644,GO:1901222,GO:0043508,GO:1902523,GO:0048471,GO:1902715,GO:1902741,GO:1903169,GO:1903753,GO:1990782,GO:0002230,GO:2000483,GO:0002577,GO:2000566,GO:0002685,GO:0004725,GO:0005634,GO:0005737,GO:0030217,GO:0031625,GO:0031663,GO:0032481,GO:0032496,GO:…	protein dephosphorylation|cytoplasmic side of plasma membrane|negative regulation of autophagy|positive regulation of gene expression|negative regulation of gene expression|phosphatase activity|positive regulation of toll-like receptor 4 signaling pathway|SH3 domain binding|positive regulation of toll-like receptor 7 signaling pathway|positive regulation of toll-like receptor 9 signaling pathway|…
Pxylp1	739.7886802	481.9809123	997.5964481	2.06978414	1.049480315	0.009737358	0.484805657	Up	1.6948	1.99113	1.29705	3.58266	2.12833	4.26694	GeneID:315939,Genbank:XM_006243591.3,RGD:1359617	2-phosphoxylose phosphatase 1	GO:0006024,GO:0010909,GO:0016021,GO:0016311,GO:0016791,GO:0050650,GO:0000139,GO:0005794	glycosaminoglycan biosynthetic process|positive regulation of heparan sulfate proteoglycan biosynthetic process|integral component of membrane|dephosphorylation|phosphatase activity|chondroitin sulfate proteoglycan biosynthetic process|Golgi membrane|Golgi apparatus
RGD1305184	149.6396937	1.987393816	297.2919936	149.5888692	7.224859019	0.000928041	0.158655238	Up	0	0.0137084	0.00473397	0.84128	0.308845	2.28521	GeneID:307412,Genbank:XM_017601111.1,RGD:1305184	similar to CDNA sequence BC023105	GO:0006952,GO:0016020,GO:0035458,GO:0003924,GO:0005525,GO:0005789	defense response|membrane|cellular response to interferon-beta|GTPase activity|GTP binding|endoplasmic reticulum membrane
RGD1309362	113.5837049	24.21031437	202.9570955	8.383083853	3.06748106	0.000435554	0.111752434	Up	0.218233	0.254043	0.112583	2.66301	0.921854	3.65666	GeneID:307415,Genbank:NM_001024884.1,RGD:1309362	similar to interferon-inducible GTPase	GO:0006952,GO:0035458,GO:0003924,GO:0005525,GO:0005789	defense response|cellular response to interferon-beta|GTPase activity|GTP binding|endoplasmic reticulum membrane
RGD1309808	25.57846633	9.277934306	41.87899836	4.513827861	2.174351401	0.000115449	0.051426313	Up	0.0391544	0.0276115	0.0512539	0.216126	0.095545	0.341281	GeneID:362951,Genbank:XM_006241935.3,RGD:1309808	similar to apolipoprotein L2	GO:0008289,GO:0016020,GO:0042157,GO:0050896,GO:0005576,GO:0006869	lipid binding|membrane|lipoprotein metabolic process|response to stimulus|extracellular region|lipid transport
RGD1309995	5964.038839	3906.238456	8021.839223	2.05359691	1.03815303	0.01978931	0.64262395	Up	13.8801	13.7186	13.3366	27.814	16.1367	35.6391	GeneID:314690,Genbank:XM_235003.9,RGD:1309995	similar to CG13957-PA	GO:0005654,GO:0005768,GO:0007032,GO:0008150,GO:0016197,GO:0031083,GO:0071203,GO:0003674,GO:0005575	nucleoplasm|endosome|endosome organization|biological_process|endosomal transport|BLOC-1 complex|WASH complex|molecular_function|cellular_component	rno04144	Endocytosis
RGD1559731	797.0114623	443.0654004	1150.957524	2.597714746	1.377243018	0.016637774	0.605130223	Up	1.55746	1.93619	1.83591	5.0128	2.16398	5.94749	GeneID:501512,Genbank:XM_008773060.1,RGD:1559731	similar to RIKEN cDNA 4930578C19	GO:0009966	regulation of signal transduction
RGD1561143	17.50436689	28.60851804	6.40021574	0.223717137	-2.160252325	0.001467989	0.200204257	Down	0.310776	0.257306	0.0996813	0.0313399	0.0921827	0.0718091	GeneID:304382,Genbank:XM_006249193.2,RGD:1561143	similar to cell surface receptor FDFACT	GO:0007169,GO:0016021,GO:0042288	transmembrane receptor protein tyrosine kinase signaling pathway|integral component of membrane|MHC class I protein binding
RGD1561157	694.2186599	383.7745375	1004.662782	2.617846376	1.388380438	0.039164547	0.816117439	Up	6.62967	8.60832	9.0717	21.5367	9.55729	29.8268	GeneID:360487,Genbank:NM_001134569.1,RGD:1561157	RGD1561157
RGD1563091	7486.319133	634.9262127	14337.71205	22.5816981	4.497082073	0.001033093	0.170622068	Up	2.34899	1.99282	2.08001	52.9608	10.8709	75.2644	GeneID:500011,Genbank:XM_575365.6,RGD:1563091	similar to OEF2	GO:0005769,GO:0005829,GO:0017145,GO:0034058,GO:0035726,GO:0042176,GO:0043231,GO:0002244,GO:0048536,GO:0005737	early endosome|cytosol|stem cell division|endosomal vesicle fusion|common myeloid progenitor cell proliferation|regulation of protein catabolic process|intracellular membrane-bounded organelle|hematopoietic progenitor cell differentiation|spleen development|cytoplasm
RT1-A1	1128.721968	535.2187196	1722.225217	3.21779705	1.686073336	1.42E-08	4.44E-05	Up	6.21013	4.40006	4.59053	21.8269	11.0682	16.864	GeneID:24973,Genbank:XM_006256099.3,RGD:1595924	RT1 class Ia, locus A1	GO:0002517,GO:0002657,GO:0005102,GO:0005515,GO:0005886,GO:0006955,GO:0016021,GO:0030881,GO:0042277,GO:0042605,GO:0042612,GO:0001916,GO:0045953,GO:0002474,GO:0046982	T cell tolerance induction|positive regulation of tolerance induction to nonself antigen|signaling receptor binding|protein binding|plasma membrane|immune response|integral component of membrane|beta-2-microglobulin binding|peptide binding|peptide antigen binding|MHC class I protein complex|positive regulation of T cell mediated cytotoxicity|negative regulation of natural killer cell mediated cyt…	rno04514,rno04144,rno04145,rno04218,rno04650,rno04612,rno05203,rno05320,rno05330,rno05332,rno05416,rno04940,rno05166,rno05168,rno05167,rno05169,rno05165	Cell adhesion molecules (CAMs)|Endocytosis|Phagosome|Cellular senescence|Natural killer cell mediated cytotoxicity|Antigen processing and presentation|Viral carcinogenesis|Autoimmune thyroid disease|Allograft rejection|Graft-versus-host disease|Viral myocarditis|Type I diabetes mellitus|HTLV-I infection|Herpes simplex infection|Kaposi's sarcoma-associated herpesvirus infection|Epstein-Barr virus …
RT1-A2	2605.15573	1708.198575	3502.112886	2.050179023	1.035749892	4.95E-05	0.026492876	Up	20.9365	17.4608	21.1661	36.3765	33.0815	47.9079	GeneID:24974,Genbank:XM_017601545.1,RGD:1595923	RT1 class Ia, locus A2	GO:0005102,GO:0005515,GO:0005886,GO:0006955,GO:0009897,GO:0010977,GO:0016021,GO:0042605,GO:0042612,GO:0045121,GO:0001916,GO:0002474,GO:0002485	signaling receptor binding|protein binding|plasma membrane|immune response|external side of plasma membrane|negative regulation of neuron projection development|integral component of membrane|peptide antigen binding|MHC class I protein complex|membrane raft|positive regulation of T cell mediated cytotoxicity|antigen processing and presentation of peptide antigen via MHC class I|antigen processing…	rno04514,rno04144,rno04145,rno04218,rno04650,rno04612,rno05203,rno05320,rno05330,rno05332,rno05416,rno04940,rno05166,rno05168,rno05167,rno05169,rno05165	Cell adhesion molecules (CAMs)|Endocytosis|Phagosome|Cellular senescence|Natural killer cell mediated cytotoxicity|Antigen processing and presentation|Viral carcinogenesis|Autoimmune thyroid disease|Allograft rejection|Graft-versus-host disease|Viral myocarditis|Type I diabetes mellitus|HTLV-I infection|Herpes simplex infection|Kaposi's sarcoma-associated herpesvirus infection|Epstein-Barr virus …
RT1-CE10	995.5780081	524.5720594	1466.583957	2.795772155	1.483246791	1.61E-17	3.02E-13	Up	2.15799	1.73693	2.95581	5.09728	7.29861	5.10088	GeneID:414792,Genbank:XM_017601729.1,RGD:1359292	RT1 class I, locus CE10	GO:0006955,GO:0016021,GO:0042605,GO:0042612,GO:0002474,GO:0005102,GO:0005886	immune response|integral component of membrane|peptide antigen binding|MHC class I protein complex|antigen processing and presentation of peptide antigen via MHC class I|signaling receptor binding|plasma membrane	rno04514,rno04144,rno04145,rno04218,rno04650,rno04612,rno05203,rno05320,rno05330,rno05332,rno05416,rno04940,rno05166,rno05168,rno05167,rno05169,rno05165	Cell adhesion molecules (CAMs)|Endocytosis|Phagosome|Cellular senescence|Natural killer cell mediated cytotoxicity|Antigen processing and presentation|Viral carcinogenesis|Autoimmune thyroid disease|Allograft rejection|Graft-versus-host disease|Viral myocarditis|Type I diabetes mellitus|HTLV-I infection|Herpes simplex infection|Kaposi's sarcoma-associated herpesvirus infection|Epstein-Barr virus …
RT1-CE4	494.606914	252.8831035	736.3307246	2.911743467	1.541883256	0.000518198	0.124433859	Up	6.24325	4.73215	4.4093	15.7889	7.41311	10.7786	GeneID:414783,Genbank:NM_001008842.1,RGD:1598234	RT1 class I, locus CE4	GO:0042612,GO:0002474,GO:0006955,GO:0016021	MHC class I protein complex|antigen processing and presentation of peptide antigen via MHC class I|immune response|integral component of membrane	rno04514,rno04144,rno04145,rno04218,rno04650,rno04612,rno05203,rno05320,rno05330,rno05332,rno05416,rno04940,rno05166,rno05168,rno05167,rno05169,rno05165	Cell adhesion molecules (CAMs)|Endocytosis|Phagosome|Cellular senescence|Natural killer cell mediated cytotoxicity|Antigen processing and presentation|Viral carcinogenesis|Autoimmune thyroid disease|Allograft rejection|Graft-versus-host disease|Viral myocarditis|Type I diabetes mellitus|HTLV-I infection|Herpes simplex infection|Kaposi's sarcoma-associated herpesvirus infection|Epstein-Barr virus …
RT1-CE7	1040.059226	494.8272081	1585.291244	3.203726913	1.679751177	0.002395796	0.249295853	Up	9.6304	6.75704	12.8015	42.6424	14.6356	26.2314	GeneID:368153,Genbank:NM_001008845.1,RGD:1595786	RT1 class I, locus CE7	GO:0016021	integral component of membrane	rno04514,rno04144,rno04145,rno04218,rno04650,rno04612,rno05203,rno05320,rno05330,rno05332,rno05416,rno04940,rno05166,rno05168,rno05167,rno05169,rno05165	Cell adhesion molecules (CAMs)|Endocytosis|Phagosome|Cellular senescence|Natural killer cell mediated cytotoxicity|Antigen processing and presentation|Viral carcinogenesis|Autoimmune thyroid disease|Allograft rejection|Graft-versus-host disease|Viral myocarditis|Type I diabetes mellitus|HTLV-I infection|Herpes simplex infection|Kaposi's sarcoma-associated herpesvirus infection|Epstein-Barr virus …
RT1-N3	1397.631308	436.9363851	2358.326231	5.397413243	2.432268149	0.0390773	0.816117439	Up	4.29864	3.05612	3.43847	19.0551	4.5203	33.0355	GeneID:24750,Genbank:XM_006255909.3,RGD:1598370	RT1 class Ib, locus N3	GO:0016021,GO:0042605,GO:0002474,GO:0005102,GO:0005886	integral component of membrane|peptide antigen binding|antigen processing and presentation of peptide antigen via MHC class I|signaling receptor binding|plasma membrane	rno04514,rno04144,rno04145,rno04218,rno04650,rno04612,rno05203,rno05320,rno05330,rno05332,rno05416,rno04940,rno05166,rno05168,rno05167,rno05169,rno05165	Cell adhesion molecules (CAMs)|Endocytosis|Phagosome|Cellular senescence|Natural killer cell mediated cytotoxicity|Antigen processing and presentation|Viral carcinogenesis|Autoimmune thyroid disease|Allograft rejection|Graft-versus-host disease|Viral myocarditis|Type I diabetes mellitus|HTLV-I infection|Herpes simplex infection|Kaposi's sarcoma-associated herpesvirus infection|Epstein-Barr virus …
RT1-S3	9328.243757	2963.782357	15692.70516	5.294823731	2.404582657	0.006161543	0.399327651	Up	18.1139	18.4121	26.1142	122.182	36.8478	154.692	GeneID:294228,Genbank:NM_001008886.2,RGD:735037	RT1 class Ib, locus S3	GO:0042612,GO:0032753,GO:0002476,GO:0046703,GO:0032759,GO:0002489,GO:0048839,GO:0032760,GO:0002715,GO:0050830,GO:0002717,GO:0005102,GO:0005886,GO:0036037,GO:0009986,GO:0051024,GO:0042270,GO:0016021,GO:2000566,GO:0042288,GO:0019731,GO:0042605,GO:0030881,GO:0001916,GO:0032398,GO:0002250,GO:0042608,GO:0032736,GO:0002474	MHC class I protein complex|positive regulation of interleukin-4 production|antigen processing and presentation of endogenous peptide antigen via MHC class Ib|natural killer cell lectin-like receptor binding|positive regulation of TRAIL production|antigen processing and presentation of endogenous peptide antigen via MHC class Ib via ER pathway, TAP-dependent|inner ear development|positive regulat…	rno04514,rno04144,rno04145,rno04218,rno04650,rno04612,rno05203,rno05320,rno05330,rno05332,rno05416,rno04940,rno05166,rno05168,rno05167,rno05169,rno05165	Cell adhesion molecules (CAMs)|Endocytosis|Phagosome|Cellular senescence|Natural killer cell mediated cytotoxicity|Antigen processing and presentation|Viral carcinogenesis|Autoimmune thyroid disease|Allograft rejection|Graft-versus-host disease|Viral myocarditis|Type I diabetes mellitus|HTLV-I infection|Herpes simplex infection|Kaposi's sarcoma-associated herpesvirus infection|Epstein-Barr virus …
RT1-T24-1	431.7784124	225.9254115	637.6314133	2.822309403	1.496876156	0.000190085	0.065931182	Up	4.79209	6.02642	3.67596	7.60798	9.39795	12.6634	GeneID:361787,Genbank:NM_001008858.1,RGD:1359499	RT1 class I, locus T24, gene 1	GO:0016021,GO:0042605,GO:0002474,GO:0005102,GO:0005886	integral component of membrane|peptide antigen binding|antigen processing and presentation of peptide antigen via MHC class I|signaling receptor binding|plasma membrane	rno04514,rno04144,rno04145,rno04218,rno04650,rno04612,rno05203,rno05320,rno05330,rno05332,rno05416,rno04940,rno05166,rno05168,rno05167,rno05169,rno05165	Cell adhesion molecules (CAMs)|Endocytosis|Phagosome|Cellular senescence|Natural killer cell mediated cytotoxicity|Antigen processing and presentation|Viral carcinogenesis|Autoimmune thyroid disease|Allograft rejection|Graft-versus-host disease|Viral myocarditis|Type I diabetes mellitus|HTLV-I infection|Herpes simplex infection|Kaposi's sarcoma-associated herpesvirus infection|Epstein-Barr virus …
RT1-T24-3	2153.87325	744.4405578	3563.305941	4.786555359	2.258987795	8.48E-06	0.010352885	Up	4.24019	6.50764	6.60561	25.5936	17.7896	35.7469	GeneID:414788,Genbank:XM_008772749.2,RGD:1624211	RT1 class I, locus T24, gene 3	GO:0042605,GO:0002474,GO:0005102,GO:0005886	peptide antigen binding|antigen processing and presentation of peptide antigen via MHC class I|signaling receptor binding|plasma membrane	rno04514,rno04144,rno04145,rno04218,rno04650,rno04612,rno05203,rno05320,rno05330,rno05332,rno05416,rno04940,rno05166,rno05168,rno05167,rno05169,rno05165	Cell adhesion molecules (CAMs)|Endocytosis|Phagosome|Cellular senescence|Natural killer cell mediated cytotoxicity|Antigen processing and presentation|Viral carcinogenesis|Autoimmune thyroid disease|Allograft rejection|Graft-versus-host disease|Viral myocarditis|Type I diabetes mellitus|HTLV-I infection|Herpes simplex infection|Kaposi's sarcoma-associated herpesvirus infection|Epstein-Barr virus …
RT1-T24-4	3358.840045	1969.277249	4748.40284	2.411241404	1.269776095	0.001109743	0.17955132	Up	18.1423	21.0447	31.8811	71.431	31.0436	48.9912	GeneID:414784,Genbank:NM_001008826.3,RGD:1598233	RT1 class I, locus T24, gene 4	GO:0006955,GO:0016021,GO:0042605,GO:0042612,GO:0002474,GO:0005102,GO:0005886	immune response|integral component of membrane|peptide antigen binding|MHC class I protein complex|antigen processing and presentation of peptide antigen via MHC class I|signaling receptor binding|plasma membrane	rno04514,rno04144,rno04145,rno04218,rno04650,rno04612,rno05203,rno05320,rno05330,rno05332,rno05416,rno04940,rno05166,rno05168,rno05167,rno05169,rno05165	Cell adhesion molecules (CAMs)|Endocytosis|Phagosome|Cellular senescence|Natural killer cell mediated cytotoxicity|Antigen processing and presentation|Viral carcinogenesis|Autoimmune thyroid disease|Allograft rejection|Graft-versus-host disease|Viral myocarditis|Type I diabetes mellitus|HTLV-I infection|Herpes simplex infection|Kaposi's sarcoma-associated herpesvirus infection|Epstein-Barr virus …
Rag2	13.32244361	26.31024231	0.334644901	0.012719187	-6.296849691	0.030885814	0.755846858	Down	0.0781216	0.012314	0.344521	0	0	0	GeneID:295953,Genbank:NM_001100528.1,RGD:1305588	recombination activating gene 2	GO:0033077,GO:0002360,GO:0033151,GO:0003674,GO:0035064,GO:0003677,GO:0003682,GO:0005546,GO:0005547,GO:0005575,GO:0035091,GO:0005634,GO:0042742,GO:0008150,GO:0043325,GO:0008270,GO:0046622,GO:0016567,GO:0002326,GO:0061630,GO:0030183,GO:0002331,GO:0080025,GO:0030217,GO:0002358	T cell differentiation in thymus|T cell lineage commitment|V(D)J recombination|molecular_function|methylated histone binding|DNA binding|chromatin binding|phosphatidylinositol-4,5-bisphosphate binding|phosphatidylinositol-3,4,5-trisphosphate binding|cellular_component|phosphatidylinositol binding|nucleus|defense response to bacterium|biological_process|phosphatidylinositol-3,4-bisphosphate bindin…	rno04068,rno05340	FoxO signaling pathway|Primary immunodeficiency
Ramp3	342.4207229	137.8605394	546.9809064	3.96763939	1.988280908	0.031112819	0.755846858	Up	4.36105	2.36871	2.57713	13.8835	3.40177	17.5	GeneID:56820,Genbank:NM_020100.2,RGD:61873	receptor (G protein-coupled) activity modifying protein 3	GO:0005886,GO:0006816,GO:0006886,GO:0007186,GO:0007189,GO:0030816,GO:0008277,GO:0030819,GO:0008565,GO:0031623,GO:0032870,GO:0033138,GO:0043235,GO:1903078,GO:0045892,GO:1903143,GO:0046982,GO:1903440,GO:1905665,GO:1990410,GO:0001525,GO:0001605,GO:0001664,GO:0001921,GO:0005622,GO:0005764,GO:0009986,GO:0010628,GO:0010739,GO:0010942,GO:0015026,GO:0051897,GO:0070374,GO:0015031,GO:0071392,GO:0072659,GO:…	plasma membrane|calcium ion transport|intracellular protein transport|G-protein coupled receptor signaling pathway|adenylate cyclase-activating G-protein coupled receptor signaling pathway|positive regulation of cAMP metabolic process|regulation of G-protein coupled receptor protein signaling pathway|positive regulation of cAMP biosynthetic process|protein transporter activity|receptor internaliz…	rno04270	Vascular smooth muscle contraction
Rbfox1	36.66424333	52.80271211	20.52577454	0.388725763	-1.36317537	0.002691552	0.263706374	Down	0.184547	0.137198	0.118348	0.0319572	0.0628996	0.0566593	GeneID:302920,Genbank:XM_017597209.1,RGD:1311210	RNA binding protein, fox-1 homolog 1	GO:0003729,GO:0005634,GO:0005737,GO:0005802,GO:0006397,GO:0007399,GO:0008022,GO:0008380,GO:0050885,GO:0000381,GO:2001014,GO:0003723	mRNA binding|nucleus|cytoplasm|trans-Golgi network|mRNA processing|nervous system development|protein C-terminus binding|RNA splicing|neuromuscular process controlling balance|regulation of alternative mRNA splicing, via spliceosome|regulation of skeletal muscle cell differentiation|RNA binding
Rbm43	765.3644604	425.5930629	1105.135858	2.596696126	1.376677195	0.009137221	0.474866967	Up	2.7691	2.60218	2.95473	7.97067	3.72907	8.8411	GeneID:311020,Genbank:NM_001037649.1,RGD:1306676	RNA binding motif protein 43	GO:0003723	RNA binding
Rfx4	13.60354838	21.88743312	5.319663644	0.243046483	-2.040695836	0.007621147	0.44634282	Down	0.080138	0.0977443	0.0612831	0.0292371	0.0164168	0.00821708	GeneID:500818,Genbank:XM_006241183.3,RGD:1562092	regulatory factor X4	GO:0030901,GO:0003682,GO:0045944,GO:0003700,GO:0060271,GO:0005634,GO:0006357,GO:0006366,GO:0070613,GO:0021516,GO:0021537,GO:0021696,GO:0021914,GO:0000978,GO:0030900,GO:0001077	midbrain development|chromatin binding|positive regulation of transcription by RNA polymerase II|DNA binding transcription factor activity|cilium assembly|nucleus|regulation of transcription by RNA polymerase II|transcription by RNA polymerase II|regulation of protein processing|dorsal spinal cord development|telencephalon development|cerebellar cortex morphogenesis|negative regulation of smoothe…
Rnase2	18.87514011	10.25798683	27.49229339	2.680086633	1.422279636	0.024730464	0.689573968	Up	0.325083	0.559282	0.578837	1.13423	0.805144	1.65393	GeneID:474169,Genbank:NM_001007015.1,RGD:1359432	ribonuclease A family member 2	GO:0004540,GO:0006935,GO:0043152,GO:0050829,GO:0050830,GO:0051607,GO:0090501,GO:1903955,GO:0001530,GO:0003676,GO:0004519	ribonuclease activity|chemotaxis|induction of bacterial agglutination|defense response to Gram-negative bacterium|defense response to Gram-positive bacterium|defense response to virus|RNA phosphodiester bond hydrolysis|positive regulation of protein targeting to mitochondrion|lipopolysaccharide binding|nucleic acid binding|endonuclease activity
Rnf114	3057.275613	1331.405408	4783.145818	3.592553997	1.845009841	0.001496228	0.200204257	Up	12.196	12.1918	12.9249	47.0195	22.4703	56.2792	GeneID:362277,Genbank:NM_001001517.1,RGD:1303139	ring finger protein 114	GO:0061630,GO:0005622,GO:0005634,GO:0005829,GO:0005886,GO:0007275,GO:0007283,GO:0030154,GO:0031624,GO:0000209,GO:0032436,GO:0003676,GO:0046872,GO:0004842	ubiquitin protein ligase activity|intracellular|nucleus|cytosol|plasma membrane|multicellular organism development|spermatogenesis|cell differentiation|ubiquitin conjugating enzyme binding|protein polyubiquitination|positive regulation of proteasomal ubiquitin-dependent protein catabolic process|nucleic acid binding|metal ion binding|ubiquitin-protein transferase activity
Rnf152	441.4586435	267.7844313	615.1328557	2.297119563	1.19982595	0.025942684	0.702279217	Up	0.654254	0.760584	0.731594	1.75683	0.782407	2.09542	GeneID:293561,Genbank:XM_017598770.1,RGD:1305251	ring finger protein 152	GO:1904262,GO:0034198,GO:0005764,GO:0046872,GO:0005765,GO:0061630,GO:0006915,GO:0010508,GO:0070534,GO:0031267,GO:0031301,GO:0070936,GO:0004842	negative regulation of TORC1 signaling|cellular response to amino acid starvation|lysosome|metal ion binding|lysosomal membrane|ubiquitin protein ligase activity|apoptotic process|positive regulation of autophagy|protein K63-linked ubiquitination|small GTPase binding|integral component of organelle membrane|protein K48-linked ubiquitination|ubiquitin-protein transferase activity	rno04150	mTOR signaling pathway
Rnf213	42895.34735	6154.846074	79635.84864	12.93872303	3.693623334	0.00737355	0.442168864	Up	6.30424	6.78633	6.72965	90.4794	15.9117	137.538	GeneID:303735,Genbank:XM_017597823.1,RGD:1308168	ring finger protein 213	GO:0016567,GO:0004842,GO:0016887,GO:0051260,GO:0005730,GO:0005737,GO:0051865,GO:0005829,GO:2000051,GO:0006511,GO:0001525,GO:0002040,GO:0016020	protein ubiquitination|ubiquitin-protein transferase activity|ATPase activity|protein homooligomerization|nucleolus|cytoplasm|protein autoubiquitination|cytosol|negative regulation of non-canonical Wnt signaling pathway|ubiquitin-dependent protein catabolic process|angiogenesis|sprouting angiogenesis|membrane
Rplp2	54.44486987	86.10269983	22.78703991	0.26464954	-1.917844948	0.003133601	0.283980713	Down	9.02047	10.1918	3.75356	1.61663	1.8682	2.94253	GeneID:140662,Genbank:NM_001030021.1,RGD:621775	ribosomal protein, large P2	GO:0005506,GO:0006414,GO:0022625,GO:0043021,GO:0045727,GO:0071320,GO:1904401,GO:0002181,GO:0003735	iron ion binding|translational elongation|cytosolic large ribosomal subunit|ribonucleoprotein complex binding|positive regulation of translation|cellular response to cAMP|cellular response to Thyroid stimulating hormone|cytoplasmic translation|structural constituent of ribosome	rno03010	Ribosome
Rsad2	12828.44407	1451.194785	24205.69336	16.67983761	4.060033338	0.010891124	0.515128175	Up	7.80621	9.22127	10.3601	141.928	23.2537	257.305	GeneID:65190,Genbank:NM_138881.1,RGD:620495	radical S-adenosyl methionine domain containing 2	GO:0005743,GO:0005783,GO:0005789,GO:0005811,GO:0043367,GO:0009615,GO:0043621,GO:0045071,GO:2000553,GO:0045087,GO:0046872,GO:0001503,GO:0001650,GO:0003674,GO:0003824,GO:0005739,GO:0005741,GO:0030278,GO:0034157,GO:0034165,GO:0050709,GO:0035710,GO:0051539,GO:0051607	mitochondrial inner membrane|endoplasmic reticulum|endoplasmic reticulum membrane|lipid droplet|CD4-positive, alpha-beta T cell differentiation|response to virus|protein self-association|negative regulation of viral genome replication|positive regulation of T-helper 2 cell cytokine production|innate immune response|metal ion binding|ossification|fibrillar center|molecular_function|catalytic activ…	rno05164	Influenza A
Rtkn	34.6809147	60.04504603	9.316783369	0.155163231	-2.688141369	1.04E-07	0.000277648	Down	0.027503	0.202728	0.015619	0.0263035	0.0259587	0.0222619	GeneID:297383,Genbank:XM_008763054.2,RGD:727874	rhotekin	GO:0030865,GO:0005095,GO:0031106,GO:0032185,GO:0005525,GO:0005622,GO:0005826,GO:0006915,GO:0007165,GO:0034260,GO:0007266,GO:0042981,GO:0017048,GO:1904498,GO:0017049,GO:0000281,GO:0000915	cortical cytoskeleton organization|GTPase inhibitor activity|septin ring organization|septin cytoskeleton organization|GTP binding|intracellular|actomyosin contractile ring|apoptotic process|signal transduction|negative regulation of GTPase activity|Rho protein signal transduction|regulation of apoptotic process|Rho GTPase binding|protein localization to mitotic actomyosin contractile ring|GTP-Rh…
Rtn4r	27.07457182	36.4957257	17.65341794	0.483711931	-1.047779973	0.045641794	0.879496703	Down	0.5678	0.709814	0.564759	0.263573	0.456078	0.172101	GeneID:113912,Genbank:NM_053613.1,RGD:620810	reticulon 4 receptor	GO:0007166,GO:0007409,GO:0008201,GO:0009986,GO:0010977,GO:0035025,GO:0035374,GO:0019221,GO:0038023,GO:0038131,GO:0048681,GO:0043005,GO:0050771,GO:0043025,GO:1905573,GO:1905576,GO:0004860,GO:0005515,GO:0005737,GO:0005783,GO:0005886,GO:0005887,GO:0006469,GO:0022038,GO:0023041,GO:0030426,GO:0030517,GO:0031362,GO:0043198,GO:0043204,GO:0043547,GO:0044295,GO:0045121,GO:0046426	cell surface receptor signaling pathway|axonogenesis|heparin binding|cell surface|negative regulation of neuron projection development|positive regulation of Rho protein signal transduction|chondroitin sulfate binding|cytokine-mediated signaling pathway|signaling receptor activity|neuregulin receptor activity|negative regulation of axon regeneration|neuron projection|negative regulation of axonog…
Rtp4	1987.579489	357.6990356	3617.459942	10.11313865	3.338158907	1.61E-05	0.013454988	Up	2.19206	2.58438	2.95146	27.5479	12.5113	34.13	GeneID:360733,Genbank:NM_001108321.1,RGD:1306974	receptor (chemosensory) transporter protein 4	GO:0005737,GO:0006612,GO:0009986,GO:0016021,GO:0031849,GO:0051205,GO:0051607,GO:0001580	cytoplasm|protein targeting to membrane|cell surface|integral component of membrane|olfactory receptor binding|protein insertion into membrane|defense response to virus|detection of chemical stimulus involved in sensory perception of bitter taste
Rxfp1	31.13828078	44.18907307	18.08748849	0.409320387	-1.28869757	0.011558425	0.530611029	Down	0.207212	0.11544	0.106829	0.052293	0.0435329	0.0634774	GeneID:295144,Genbank:XM_006232508.3,RGD:1302973	relaxin/insulin-like family peptide receptor 1	GO:0030198,GO:0004930,GO:0042562,GO:0005622,GO:0005886,GO:0007188,GO:0007189,GO:0046872,GO:0007567,GO:0060427,GO:0016021,GO:0060658,GO:0030154	extracellular matrix organization|G-protein coupled receptor activity|hormone binding|intracellular|plasma membrane|adenylate cyclase-modulating G-protein coupled receptor signaling pathway|adenylate cyclase-activating G-protein coupled receptor signaling pathway|metal ion binding|parturition|lung connective tissue development|integral component of membrane|nipple morphogenesis|cell differentiati…	rno04080,rno04926	Neuroactive ligand-receptor interaction|Relaxin signaling pathway
Samd9l	7318.380788	866.8782883	13769.88329	15.88444822	3.989543071	0.003734926	0.308172527	Up	3.98815	4.1929	4.38502	72.7741	12.8795	103.936	GeneID:500015,Genbank:XM_006236084.3,RGD:1562531	sterile alpha motif domain containing 9-like
Samhd1	2622.743656	716.9763328	4528.510979	6.31612338	2.659039353	0.012683648	0.544749806	Up	5.04971	4.43368	5.17476	30.2332	10.0266	48.7623	GeneID:311580,Genbank:NM_001191743.1,RGD:1308369	SAM and HD domain containing deoxynucleoside triphosphate triphosphohydrolase 1	GO:0042802,GO:0005634,GO:0045088,GO:0005654,GO:0005886,GO:0006203,GO:0046061,GO:0051289,GO:0008270,GO:0051607,GO:0008832,GO:0003676,GO:0090501,GO:0016793,GO:0003723,GO:0032567,GO:0004540	identical protein binding|nucleus|regulation of innate immune response|nucleoplasm|plasma membrane|dGTP catabolic process|dATP catabolic process|protein homotetramerization|zinc ion binding|defense response to virus|dGTPase activity|nucleic acid binding|RNA phosphodiester bond hydrolysis|triphosphoric monoester hydrolase activity|RNA binding|dGTP binding|ribonuclease activity
Sap30	91.2871157	56.98275998	125.5914714	2.20402577	1.140141092	0.026201584	0.702279217	Up	0.785621	1.29116	0.957356	2.1304	1.13811	2.83402	GeneID:680122,Genbank:XM_017600355.1,RGD:1595501	Sin3A-associated protein	GO:0003712,GO:0003714,GO:0004407,GO:0005634,GO:0005654,GO:0006355,GO:0035914,GO:0000118,GO:0000122	transcription cofactor activity|transcription corepressor activity|histone deacetylase activity|nucleus|nucleoplasm|regulation of transcription, DNA-templated|skeletal muscle cell differentiation|histone deacetylase complex|negative regulation of transcription by RNA polymerase II
Sbk2	51.54904765	74.99212727	28.10596804	0.374785582	-1.415862643	0.00791535	0.448847496	Down	0.750433	0.440269	0.568577	0.074622	0.154872	0.38384	GeneID:691411,Genbank:NM_001127539.2,RGD:1563279	SH3 domain binding kinase family, member 2	GO:0007266,GO:0007346,GO:0016477,GO:0023014,GO:0030036,GO:0031098,GO:0032147,GO:0042981,GO:0043408,GO:0048365,GO:0004674,GO:0005524,GO:0005737	Rho protein signal transduction|regulation of mitotic cell cycle|cell migration|signal transduction by protein phosphorylation|actin cytoskeleton organization|stress-activated protein kinase signaling cascade|activation of protein kinase activity|regulation of apoptotic process|regulation of MAPK cascade|Rac GTPase binding|protein serine/threonine kinase activity|ATP binding|cytoplasm
Sbk3	23.10844815	38.13205192	8.084844379	0.212022274	-2.237712256	0.000148818	0.056884938	Down	0.524328	0.355857	0.484026	0.0647326	0.0764966	0.153423	GeneID:691408,Genbank:XM_001078116.6,RGD:1583965	SH3 domain binding kinase family, member 3	GO:0004674,GO:0005524,GO:0006468	protein serine/threonine kinase activity|ATP binding|protein phosphorylation
Sectm1b	14.73583663	4.305323236	25.16635002	5.845403154	2.54730253	0.016773452	0.605130223	Up	0.0400123	0.0201135	0.0514187	0.206192	0.0772504	0.280535	GeneID:287884,Genbank:XM_006247881.3,RGD:735132	secreted and transmembrane 1B	GO:0007165,GO:0010469,GO:0016021,GO:0004871,GO:0005125,GO:0006955	signal transduction|regulation of signaling receptor activity|integral component of membrane|signal transducer activity|cytokine activity|immune response
Serpinb9	4015.614361	2461.215271	5570.01345	2.263115102	1.178309962	0.029664772	0.746802665	Up	13.9449	14.4813	16.548	35.3231	16.701	44.4054	GeneID:361241,Genbank:XM_006253872.2,RGD:1549730	serpin family B member 9	GO:0042270,GO:0005829,GO:0002448,GO:0042742,GO:0006915,GO:0003674,GO:0043027,GO:0006955,GO:0004867,GO:0043066,GO:0005575,GO:0005615,GO:0008150,GO:0005622,GO:0043154,GO:0009617,GO:0005634,GO:0070233,GO:0010628,GO:0005654,GO:0071391,GO:0010951,GO:0005737,GO:0001913,GO:0002020,GO:0033668,GO:0005794,GO:0002438	protection from natural killer cell mediated cytotoxicity|cytosol|mast cell mediated immunity|defense response to bacterium|apoptotic process|molecular_function|cysteine-type endopeptidase inhibitor activity involved in apoptotic process|immune response|serine-type endopeptidase inhibitor activity|negative regulation of apoptotic process|cellular_component|extracellular space|biological_process|i…	rno05146	Amoebiasis
Serpine1	1413.971524	424.3773943	2403.565653	5.663745726	2.501756497	0.025756668	0.70193993	Up	2.01044	2.59252	4.18473	14.2015	5.55961	27.4358	GeneID:24617,Genbank:NM_012620.1,RGD:3249	serpin family E member 1	GO:0071549,GO:0071559,GO:0071560,GO:0090026,GO:0090280,GO:1990830,GO:0090399,GO:2000098,GO:2000352,GO:0004867,GO:0005102,GO:0010951,GO:0005576,GO:0005615,GO:0014912,GO:0033629,GO:0030194,GO:0030336,GO:0034097,GO:0034616,GO:0035491,GO:0035690,GO:0000302,GO:0045766,GO:0035865,GO:0001300,GO:0045861,GO:0036120,GO:0046697,GO:0042060,GO:0001525,GO:0048146,GO:0048260,GO:0001890,GO:0002020,GO:0070849,GO:…	cellular response to dexamethasone stimulus|response to transforming growth factor beta|cellular response to transforming growth factor beta stimulus|positive regulation of monocyte chemotaxis|positive regulation of calcium ion import|cellular response to leukemia inhibitory factor|replicative senescence|negative regulation of smooth muscle cell-matrix adhesion|negative regulation of endothelial …	rno04390,rno04371,rno04066,rno04115,rno04218,rno04610,rno04933,rno05142	Hippo signaling pathway|Apelin signaling pathway|HIF-1 signaling pathway|p53 signaling pathway|Cellular senescence|Complement and coagulation cascades|AGE-RAGE signaling pathway in diabetic complications|Chagas disease (American trypanosomiasis)
Sit1	41.72077694	62.1562196	21.28533428	0.342448984	-1.546039013	0.004186601	0.326638762	Down	0.875835	0.819862	1.50841	0.221932	0.634728	0.13894	GeneID:500449,Genbank:NM_001024344.1,RGD:1559919	signaling threshold regulating transmembrane adaptor 1	GO:0007165,GO:0016021,GO:0019900,GO:0042169,GO:0043029,GO:0050863,GO:0002250,GO:0005886	signal transduction|integral component of membrane|kinase binding|SH2 domain binding|T cell homeostasis|regulation of T cell activation|adaptive immune response|plasma membrane
Six2	17.32273319	25.24636355	9.399102826	0.372295313	-1.42548064	0.029434885	0.745507562	Down	0.799412	0.769563	0.453764	0.183747	0.156393	0.361886	GeneID:366542,Genbank:NM_001191908.1,RGD:1310792	SIX homeobox 2	GO:0072028,GO:0042474,GO:0001822,GO:0072038,GO:0043565,GO:0002062,GO:0072137,GO:0044877,GO:0003337,GO:0072161,GO:0003700,GO:0005634,GO:0006606,GO:0007501,GO:0045596,GO:0008134,GO:0090189,GO:0045944,GO:0008283,GO:0097168,GO:0048557,GO:0009948,GO:1902732,GO:0048701,GO:0016477,GO:0000978,GO:0048704,GO:0030278,GO:0001077,GO:0072006,GO:0032330,GO:0001656	nephron morphogenesis|middle ear morphogenesis|kidney development|mesenchymal stem cell maintenance involved in nephron morphogenesis|sequence-specific DNA binding|chondrocyte differentiation|condensed mesenchymal cell proliferation|protein-containing complex binding|mesenchymal to epithelial transition involved in metanephros morphogenesis|mesenchymal cell differentiation involved in kidney deve…
Skap1	81.53643109	109.0876714	53.98519075	0.494878936	-1.014852459	0.001478142	0.200204257	Down	1.19912	1.56198	1.31203	0.344431	0.775701	0.566063	GeneID:286975,Genbank:XM_017597053.1,RGD:708436	src kinase associated phosphoprotein 1	GO:0042169,GO:0005634,GO:0044877,GO:0045785,GO:0005737,GO:0005829,GO:0005886,GO:0045893,GO:0005911,GO:0045944,GO:0009967,GO:0050852,GO:0019901,GO:0072659,GO:0019903,GO:0002250,GO:0042101,GO:0002757,GO:0005070	SH2 domain binding|nucleus|protein-containing complex binding|positive regulation of cell adhesion|cytoplasm|cytosol|plasma membrane|positive regulation of transcription, DNA-templated|cell-cell junction|positive regulation of transcription by RNA polymerase II|positive regulation of signal transduction|T cell receptor signaling pathway|protein kinase binding|protein localization to plasma membra…	rno04015	Rap1 signaling pathway
Slamf6	94.40709874	127.5734595	61.24073796	0.480042935	-1.058764648	0.00381778	0.313535793	Down	0.469768	0.436581	0.65324	0.135147	0.419244	0.180733	GeneID:498287,Genbank:XM_006250301.3,RGD:1561848	SLAM family member 6	GO:0016021,GO:0032729,GO:0032740,GO:0045954,GO:0072540,GO:0001779,GO:0001787,GO:0005886	integral component of membrane|positive regulation of interferon-gamma production|positive regulation of interleukin-17 production|positive regulation of natural killer cell mediated cytotoxicity|T-helper 17 cell lineage commitment|natural killer cell differentiation|natural killer cell proliferation|plasma membrane
Slc26a3	90.37365765	122.7738674	57.97344788	0.472196968	-1.082539318	0.001470877	0.200204257	Down	0.852879	0.792947	0.840201	0.437303	0.506961	0.11017	GeneID:114629,Genbank:NM_053755.2,RGD:620623	solute carrier family 26 member 3	GO:0060081,GO:0019532,GO:0015106,GO:0071320,GO:0031526,GO:0015108,GO:0015116,GO:0015301,GO:0042391,GO:0097225,GO:0048240,GO:0015701,GO:0016020,GO:1902358,GO:0051453,GO:0005254,GO:0051454,GO:0016324,GO:0005887,GO:1902476,GO:0019531,GO:0008271	membrane hyperpolarization|oxalate transport|bicarbonate transmembrane transporter activity|cellular response to cAMP|brush border membrane|chloride transmembrane transporter activity|sulfate transmembrane transporter activity|anion:anion antiporter activity|regulation of membrane potential|sperm midpiece|sperm capacitation|bicarbonate transport|membrane|sulfate transmembrane transport|regulation…	rno04972,rno04978	Pancreatic secretion|Mineral absorption
Slfn1	502.3838084	114.307687	890.4599298	7.790026665	2.961628267	0.000131236	0.055196161	Up	1.29702	1.14198	1.4877	10.7092	4.79591	13.717	GeneID:688900,Genbank:XM_001068751.5,RGD:1583007	schlafen 1	GO:0003674,GO:0005575,GO:0008150	molecular_function|cellular_component|biological_process
Slfn2	4564.577155	1728.723218	7400.431093	4.280865217	2.097902413	0.000344921	0.100173892	Up	18.402	16.7764	18.2205	78.6785	40.1365	96.6989	GeneID:303380,Genbank:NM_001107031.1,RGD:1308645	schlafen 2	GO:0005524,GO:0008285	ATP binding|negative regulation of cell proliferation
Slfn4	5173.428255	848.9743588	9497.88215	11.18747822	3.483812969	0.013999937	0.563911427	Up	3.48079	3.35348	3.69659	28.9428	12.3412	67.2981	GeneID:114247,Genbank:XM_008767933.2,RGD:620455	schlafen 4	GO:0005524,GO:0016021,GO:0048286	ATP binding|integral component of membrane|lung alveolus development
Slfn5	37047.83756	15679.26673	58416.40839	3.72571048	1.897515569	0.001168882	0.182409787	Up	49.0236	55.9706	58.0886	219.682	100.534	252.553	GeneID:303377,Genbank:XM_008768150.2,RGD:1312025	schlafen family member 5	GO:0005524,GO:0005634	ATP binding|nucleus
Sln	156.7159068	220.7289675	92.70284599	0.419984957	-1.251590439	0.00042768	0.111713418	Down	10.9363	8.84876	6.5383	1.40765	3.5534	4.23923	GeneID:367086,Genbank:NM_001013247.1,RGD:1305224	sarcolipin	GO:1901894,GO:0016529,GO:0030234,GO:0033017,GO:0051924,GO:0070296,GO:1901077,GO:0016021	regulation of calcium-transporting ATPase activity|sarcoplasmic reticulum|enzyme regulator activity|sarcoplasmic reticulum membrane|regulation of calcium ion transport|sarcoplasmic reticulum calcium ion transport|regulation of relaxation of muscle|integral component of membrane
Smpx	144.8487322	200.9003977	88.79706671	0.441995475	-1.177896495	0.002055678	0.230554968	Down	1.5129	0.970379	1.07444	0.229699	0.582116	0.661215	GeneID:84416,Genbank:XM_006256945.3,RGD:69233	small muscle protein, X-linked	GO:0005927,GO:0006941,GO:0031430,GO:0043034,GO:0043292,GO:0005634,GO:0005737	muscle tendon junction|striated muscle contraction|M band|costamere|contractile fiber|nucleus|cytoplasm
Socs1	208.0582855	58.89205171	357.2245193	6.065750963	2.600686267	0.034434065	0.787930956	Up	2.25177	1.33688	2.76312	11.6485	3.10465	21.1729	GeneID:252971,Genbank:NM_145879.2,RGD:69272	suppressor of cytokine signaling 1	GO:0005737,GO:0006469,GO:0007259,GO:0010533,GO:0016567,GO:0036464,GO:0019210,GO:0040008,GO:0019221,GO:0042493,GO:0042509,GO:0042532,GO:0060334,GO:0043434,GO:0071230,GO:0045444,GO:0071345,GO:0071407,GO:0001932,GO:0003674,GO:0004860,GO:0005159,GO:0005575,GO:0005634,GO:0005654,GO:0019901,GO:0031100,GO:0031410,GO:0032355,GO:0045591,GO:0032496,GO:0032570,GO:0046425,GO:0034097,GO:0046426,GO:0046627,GO:…	cytoplasm|negative regulation of protein kinase activity|JAK-STAT cascade|regulation of activation of Janus kinase activity|protein ubiquitination|cytoplasmic ribonucleoprotein granule|kinase inhibitor activity|regulation of growth|cytokine-mediated signaling pathway|response to drug|regulation of tyrosine phosphorylation of STAT protein|negative regulation of tyrosine phosphorylation of STAT pro…	rno04120,rno04630,rno04910,rno04917,rno04380,rno05206,rno04930,rno05145	Ubiquitin mediated proteolysis|Jak-STAT signaling pathway|Insulin signaling pathway|Prolactin signaling pathway|Osteoclast differentiation|MicroRNAs in cancer|Type II diabetes mellitus|Toxoplasmosis
Sp100	1246.954913	559.0110629	1934.898763	3.461288857	1.791309345	0.007971566	0.448847496	Up	4.37607	4.34855	4.13354	14.3938	5.6991	18.5384	GeneID:363269,Genbank:NM_001014220.1,RGD:1359550	SP100 nuclear antigen	GO:0006338,GO:0006355,GO:0006978,GO:0008134,GO:0010596,GO:0016604,GO:0016605,GO:0045185,GO:0019900,GO:0045765,GO:0019904,GO:0045892,GO:0030870,GO:0045893,GO:0046826,GO:0051091,GO:0051271,GO:0070087,GO:1902041,GO:1902044,GO:0000122,GO:0000723,GO:0003682,GO:0003713,GO:0003714,GO:0005634,GO:0005730,GO:0005737,GO:0032526,GO:0032897,GO:0034097,GO:0034340,GO:0034341,GO:0034399,GO:0042802,GO:0042803,GO:…	chromatin remodeling|regulation of transcription, DNA-templated|DNA damage response, signal transduction by p53 class mediator resulting in transcription of p21 class mediator|transcription factor binding|negative regulation of endothelial cell migration|nuclear body|PML body|maintenance of protein location|kinase binding|regulation of angiogenesis|protein domain specific binding|negative regulat…	rno05203,rno05168	Viral carcinogenesis|Herpes simplex infection
Sp110	3403.609387	1027.990116	5779.228658	5.621871814	2.491050559	0.010662569	0.50977268	Up	7.13594	8.07259	7.95875	44.9387	14.7609	66.6424	GeneID:301570,Genbank:XM_006245370.3,RGD:1310173	SP110 nuclear body protein	GO:0005634,GO:0006338,GO:0006351,GO:0006355,GO:0006915,GO:0009617,GO:0043065,GO:0045087,GO:0003677,GO:0003682	nucleus|chromatin remodeling|transcription, DNA-templated|regulation of transcription, DNA-templated|apoptotic process|response to bacterium|positive regulation of apoptotic process|innate immune response|DNA binding|chromatin binding
Sp140	1384.052461	840.2624225	1927.8425	2.294333828	1.19807532	0.045832194	0.881352152	Up	4.42382	3.8563	3.79665	8.74327	4.2631	13.0641	GeneID:316580,Genbank:NM_001012133.1,RGD:1306355	SP140 nuclear body protein	GO:0005634,GO:0005739,GO:0006338,GO:0006355,GO:0046872,GO:0001650,GO:0003677,GO:0003682	nucleus|mitochondrion|chromatin remodeling|regulation of transcription, DNA-templated|metal ion binding|fibrillar center|DNA binding|chromatin binding
Spats2l	614.2975026	175.4788244	1053.116181	6.001386118	2.585295753	0.022327989	0.668653659	Up	1.2106	0.959767	1.03607	7.37467	1.18424	8.90673	GeneID:316426,Genbank:XM_006244992.2,RGD:1309930	spermatogenesis associated, serine-rich 2-like	GO:0005737,GO:0005829,GO:0032991,GO:0005634,GO:0005730	cytoplasm|cytosol|protein-containing complex|nucleus|nucleolus
Spo11	17.2648148	27.81445856	6.715171038	0.241427351	-2.050338971	0.00233384	0.246845727	Down	0.0287257	0.0636649	0.101734	0	0.0279103	0.0111733	GeneID:366261,Genbank:XM_008762525.2,RGD:1306454	SPO11, initiator of meiotic double stranded breaks	GO:0016889,GO:0000781,GO:0034502,GO:0001541,GO:0042138,GO:0003677,GO:0003824,GO:0003918,GO:0005524,GO:0045141,GO:0007129,GO:0048477,GO:0007130,GO:1990918,GO:0007131,GO:0000228,GO:0007141,GO:0000706,GO:0007286,GO:0000737	endodeoxyribonuclease activity, producing 3'-phosphomonoesters|chromosome, telomeric region|protein localization to chromosome|ovarian follicle development|meiotic DNA double-strand break formation|DNA binding|catalytic activity|DNA topoisomerase type II (ATP-hydrolyzing) activity|ATP binding|meiotic telomere clustering|synapsis|oogenesis|synaptonemal complex assembly|double-strand break repair i…
Srms	27.89194528	41.0833008	14.70058976	0.357823969	-1.482678064	0.005520857	0.380167816	Down	0.272054	0.410914	0.364093	0.0437094	0.290891	0.0429364	GeneID:296472,Genbank:NM_001011961.1,RGD:1306602	src-related kinase lacking C-terminal regulatory tyrosine and N-terminal myristylation sites	GO:0005524,GO:0005737,GO:0007169,GO:0030154,GO:0031234,GO:0038083,GO:0042127,GO:0045087,GO:0004713,GO:0004715,GO:0005102	ATP binding|cytoplasm|transmembrane receptor protein tyrosine kinase signaling pathway|cell differentiation|extrinsic component of cytoplasmic side of plasma membrane|peptidyl-tyrosine autophosphorylation|regulation of cell proliferation|innate immune response|protein tyrosine kinase activity|non-membrane spanning protein tyrosine kinase activity|signaling receptor binding
Srpk3	18.67484222	26.24733388	11.10235056	0.422989649	-1.241305734	0.047149258	0.884665314	Down	0.0941116	0.0996667	0.0768527	0.0325899	0.0482726	0.0644495	GeneID:293854,Genbank:XM_006229558.3,RGD:727856	SRSF protein kinase 3	GO:0005524,GO:0005634,GO:0005737,GO:0006468,GO:0007519,GO:0035556,GO:0050684,GO:0060537,GO:0000245,GO:0004674	ATP binding|nucleus|cytoplasm|protein phosphorylation|skeletal muscle tissue development|intracellular signal transduction|regulation of mRNA processing|muscle tissue development|spliceosomal complex assembly|protein serine/threonine kinase activity
Stat1	11635.76379	3881.689713	19389.83786	4.995205515	2.320544035	0.014411906	0.566940999	Up	15.7506	15.4441	16.6401	78.7706	26.2511	119.7	GeneID:25124,Genbank:NM_032612.3,RGD:3771	signal transducer and activator of transcription 1	GO:0003700,GO:0004871,GO:0005164,GO:0005634,GO:0008015,GO:0008284,GO:0005654,GO:0009612,GO:0005730,GO:0009617,GO:0010742,GO:0014070,GO:0016525,GO:0034340,GO:0019221,GO:0035035,GO:0019899,GO:0035257,GO:0030424,GO:0035456,GO:0035458,GO:0042393,GO:0042493,GO:0000790,GO:0046725,GO:0042542,GO:0000978,GO:0048471,GO:0042802,GO:0000979,GO:0048661,GO:0042803,GO:0000983,GO:0051591,GO:0001047,GO:0051607,GO:…	DNA binding transcription factor activity|signal transducer activity|tumor necrosis factor receptor binding|nucleus|blood circulation|positive regulation of cell proliferation|nucleoplasm|response to mechanical stimulus|nucleolus|response to bacterium|macrophage derived foam cell differentiation|response to organic cyclic compound|negative regulation of angiogenesis|response to type I interferon|…	rno04630,rno04217,rno04620,rno04621,rno04625,rno04658,rno04659,rno04062,rno04917,rno04919,rno04380,rno05200,rno05212,rno05321,rno04933,rno05152,rno05162,rno05164,rno05161,rno05160,rno05168,rno05167,rno05165,rno05145,rno05140	Jak-STAT signaling pathway|Necroptosis|Toll-like receptor signaling pathway|NOD-like receptor signaling pathway|C-type lectin receptor signaling pathway|Th1 and Th2 cell differentiation|Th17 cell differentiation|Chemokine signaling pathway|Prolactin signaling pathway|Thyroid hormone signaling pathway|Osteoclast differentiation|Pathways in cancer|Pancreatic cancer|Inflammatiory bowel disease (IBD)…
Stat2	6638.408627	2402.824534	10873.99272	4.525504282	2.178078562	0.012808297	0.544749806	Up	11.5069	12.6136	11.9418	56.1116	18.3895	76.6306	GeneID:288774,Genbank:XM_006240747.3,RGD:1311649	signal transducer and activator of transcription 2	GO:0044389,GO:0003700,GO:0051607,GO:0004871,GO:0060337,GO:0005575,GO:0005634,GO:0005737,GO:0005829,GO:0090140,GO:0005886,GO:0006351,GO:0006355,GO:0001932,GO:0008150,GO:0003674,GO:0042802,GO:0003677	ubiquitin-like protein ligase binding|DNA binding transcription factor activity|defense response to virus|signal transducer activity|type I interferon signaling pathway|cellular_component|nucleus|cytoplasm|cytosol|regulation of mitochondrial fission|plasma membrane|transcription, DNA-templated|regulation of transcription, DNA-templated|regulation of protein phosphorylation|biological_process|mole…	rno04630,rno04217,rno04621,rno04625,rno04062,rno04380,rno05200,rno05162,rno05164,rno05161,rno05160,rno05168,rno05167,rno05165	Jak-STAT signaling pathway|Necroptosis|NOD-like receptor signaling pathway|C-type lectin receptor signaling pathway|Chemokine signaling pathway|Osteoclast differentiation|Pathways in cancer|Measles|Influenza A|Hepatitis B|Hepatitis C|Herpes simplex infection|Kaposi's sarcoma-associated herpesvirus infection|Human papillomavirus infection
Stmn2	65.06056597	90.81113928	39.30999266	0.43287633	-1.207973181	0.00058074	0.135058023	Down	1.02571	1.08592	1.00829	0.335173	0.422854	0.463564	GeneID:84510,Genbank:NM_053440.2,RGD:68947	stathmin 2	GO:0043025,GO:0030426,GO:0005737,GO:0031115,GO:0005768,GO:0048306,GO:0005794,GO:0048471,GO:0007019,GO:0007026,GO:0010976,GO:0031117,GO:0010977,GO:0051493,GO:0031175,GO:0015631,GO:1990090,GO:0031982,GO:0016020,GO:0043005,GO:0030027,GO:0005515	neuronal cell body|growth cone|cytoplasm|negative regulation of microtubule polymerization|endosome|calcium-dependent protein binding|Golgi apparatus|perinuclear region of cytoplasm|microtubule depolymerization|negative regulation of microtubule depolymerization|positive regulation of neuron projection development|positive regulation of microtubule depolymerization|negative regulation of neuron p…
Stoml1	340.3910627	198.4647522	482.3173732	2.430241985	1.281099974	0.024216828	0.68915415	Up	1.84088	2.26029	2.31902	5.81803	2.45537	6.58255	GeneID:300748,Genbank:XM_006243184.3,RGD:1559463	stomatin like 1	GO:0031410,GO:0060395,GO:1901586,GO:1990830,GO:0005886,GO:0008200,GO:0016021	cytoplasmic vesicle|SMAD protein signal transduction|negative regulation of acid-sensing ion channel activity|cellular response to leukemia inhibitory factor|plasma membrane|ion channel inhibitor activity|integral component of membrane
Sult1d1	9.661006344	15.9475886	3.374424089	0.211594629	-2.240625089	0.01472633	0.571064512	Down	0.204228	0.209745	0.0847116	0.011187	0.0220243	0.0552752	GeneID:60393,Genbank:NM_021769.1,RGD:620491	sulfotransferase family 1D, member 1	GO:0006584,GO:0006629,GO:0008146,GO:0051923,GO:0000103,GO:0004062,GO:0005737	catecholamine metabolic process|lipid metabolic process|sulfotransferase activity|sulfation|sulfate assimilation|aryl sulfotransferase activity|cytoplasm
Sv2c	230.8397898	383.9445484	77.73503114	0.202464214	-2.304261165	0.006065676	0.398631955	Down	0.422983	1.47735	0.922132	0.189109	0.176088	0.178955	GeneID:29643,Genbank:XM_017590796.1,RGD:619718	synaptic vesicle glycoprotein 2c	GO:0008021,GO:0016021,GO:0022857,GO:0030054,GO:0030672,GO:0043005,GO:0055085,GO:0005515,GO:0006836,GO:0007268	synaptic vesicle|integral component of membrane|transmembrane transporter activity|cell junction|synaptic vesicle membrane|neuron projection|transmembrane transport|protein binding|neurotransmitter transport|chemical synaptic transmission	rno04512	ECM-receptor interaction
Tap1	3195.323295	964.4973789	5426.14921	5.625882795	2.492079497	0.001614871	0.208596724	Up	9.04779	7.61894	10.3233	59.2291	20.0575	65.596	GeneID:24811,Genbank:NM_032055.4,RGD:3817	transporter 1, ATP binding cassette subfamily B member	GO:0005815,GO:0006952,GO:0015031,GO:0015433,GO:0015440,GO:0042288,GO:0015833,GO:0042605,GO:0042626,GO:0042803,GO:0042825,GO:0046980,GO:0046982,GO:0043231,GO:0055085,GO:0043531,GO:1904680,GO:0000166,GO:0002250,GO:0005515,GO:0005524,GO:0005739,GO:0005783,GO:0016021,GO:0016887,GO:0019885,GO:0023029,GO:0030176,GO:0042270,GO:0046967,GO:0046968,GO:0046978,GO:0046979	microtubule organizing center|defense response|protein transport|peptide antigen-transporting ATPase activity|peptide-transporting ATPase activity|MHC class I protein binding|peptide transport|peptide antigen binding|ATPase activity, coupled to transmembrane movement of substances|protein homodimerization activity|TAP complex|tapasin binding|protein heterodimerization activity|intracellular membr…	rno02010,rno04145,rno04612,rno05340,rno05168	ABC transporters|Phagosome|Antigen processing and presentation|Primary immunodeficiency|Herpes simplex infection
Tapbp	3859.299391	1819.483731	5899.11505	3.2421917	1.696969395	0.021424155	0.662169007	Up	28.8288	29.106	32.5023	97.673	40.2777	139.729	GeneID:25217,Genbank:NM_033098.2,RGD:3819	TAP binding protein (tapasin)	GO:0005515,GO:0005789,GO:0006952,GO:0010468,GO:0019885,GO:0042824,GO:0042825,GO:0046978,GO:0046979,GO:0050823,GO:0051082,GO:0000139,GO:0061635,GO:0002397,GO:0002479	protein binding|endoplasmic reticulum membrane|defense response|regulation of gene expression|antigen processing and presentation of endogenous peptide antigen via MHC class I|MHC class I peptide loading complex|TAP complex|TAP1 binding|TAP2 binding|peptide antigen stabilization|unfolded protein binding|Golgi membrane|regulation of protein complex stability|MHC class I protein complex assembly|an…	rno04612	Antigen processing and presentation
Tapbpl	1327.199612	814.553924	1839.845299	2.258715163	1.17550235	0.046229273	0.884142717	Up	10.9369	7.98309	8.5174	20.4758	10.1717	28.4283	GeneID:297602,Genbank:NM_001106622.1,RGD:1307893	TAP binding protein-like	GO:0044877,GO:0002590,GO:0016021	protein-containing complex binding|negative regulation of antigen processing and presentation of peptide antigen via MHC class I|integral component of membrane
Tcf7	997.6982598	1356.310583	639.0859365	0.471194389	-1.085605735	0.0072963	0.442168864	Down	7.31638	8.57347	13.1047	3.67932	6.75861	2.96567	GeneID:363595,Genbank:XM_006246365.3,RGD:1305894	transcription factor 7 (T-cell specific, HMG-box)	GO:0043565,GO:0008150,GO:0003674,GO:0044212,GO:0016055,GO:0003677,GO:0003700,GO:0044336,GO:0005575,GO:0005634,GO:0005654,GO:0005667,GO:0016604,GO:0005719,GO:0046632,GO:0006355,GO:0048557,GO:0021915,GO:0048619,GO:0030538,GO:0006357,GO:0000122,GO:0060070,GO:0033153,GO:0008013,GO:0001047,GO:0071353,GO:0042127,GO:0001227	sequence-specific DNA binding|biological_process|molecular_function|transcription regulatory region DNA binding|Wnt signaling pathway|DNA binding|DNA binding transcription factor activity|canonical Wnt signaling pathway involved in negative regulation of apoptotic process|cellular_component|nucleus|nucleoplasm|transcription factor complex|nuclear body|nuclear euchromatin|alpha-beta T cell differe…	rno04310,rno04390,rno04520,rno04916,rno05200,rno05210,rno05225,rno05226,rno05216,rno05221,rno05217,rno05215,rno05213,rno05224,rno05412,rno04934,rno05165	Wnt signaling pathway|Hippo signaling pathway|Adherens junction|Melanogenesis|Pathways in cancer|Colorectal cancer|Hepatocellular carcinoma|Gastric cancer|Thyroid cancer|Acute myeloid leukemia|Basal cell carcinoma|Prostate cancer|Endometrial cancer|Breast cancer|Arrhythmogenic right ventricular cardiomyopathy (ARVC)|Cushing's syndrome|Human papillomavirus infection
Tcirg1	1907.499467	1031.928789	2783.070145	2.696959493	1.431333853	0.018764028	0.629839145	Up	5.62534	5.02412	4.6275	14.5771	6.60977	18.1639	GeneID:293650,Genbank:XM_006230728.2,RGD:735136	T-cell immune regulator 1, ATPase H+ transporting V0 subunit A3	GO:0070072,GO:0005886,GO:1902600,GO:0007035,GO:0007039,GO:0015078,GO:0015986,GO:0015991,GO:0016021,GO:0016236,GO:0016324,GO:0016471,GO:0033179,GO:0000220,GO:0046961,GO:0005575,GO:0051117	vacuolar proton-transporting V-type ATPase complex assembly|plasma membrane|proton transmembrane transport|vacuolar acidification|protein catabolic process in the vacuole|proton transmembrane transporter activity|ATP synthesis coupled proton transport|ATP hydrolysis coupled proton transport|integral component of membrane|macroautophagy|apical plasma membrane|vacuolar proton-transporting V-type AT…	rno00190,rno04145,rno04142,rno04966,rno04721,rno05323,rno05152,rno05165	Oxidative phosphorylation|Phagosome|Lysosome|Collecting duct acid secretion|Synaptic vesicle cycle|Rheumatoid arthritis|Tuberculosis|Human papillomavirus infection
Tdrd7	2345.19501	1425.312879	3265.077142	2.290779231	1.195838429	0.005277054	0.36952395	Up	5.65749	5.69907	6.48906	14.3985	7.64578	16.3728	GeneID:85425,Genbank:XM_006238108.2,RGD:619724	tudor domain containing 7	GO:0070306,GO:0003729,GO:0005737,GO:0005759,GO:0007281,GO:0007283,GO:0010608,GO:0033391,GO:0035770,GO:0002089,GO:0043186,GO:0047485	lens fiber cell differentiation|mRNA binding|cytoplasm|mitochondrial matrix|germ cell development|spermatogenesis|posttranscriptional regulation of gene expression|chromatoid body|ribonucleoprotein granule|lens morphogenesis in camera-type eye|P granule|protein N-terminus binding
Themis	75.30772462	118.5298027	32.08564657	0.27069687	-1.88524989	0.009957486	0.487121994	Down	0.428015	0.46004	1.09284	0.109822	0.24494	0.1145	GeneID:498985,Genbank:XM_017589835.1,RGD:1560849	thymocyte selection associated	GO:0008180,GO:0043368,GO:0043383,GO:0050852,GO:0005634,GO:0005737,GO:0005911	COP9 signalosome|positive T cell selection|negative T cell selection|T cell receptor signaling pathway|nucleus|cytoplasm|cell-cell junction
Tlr3	1359.885257	665.0063991	2054.764115	3.089841117	1.627532655	0.046206395	0.884142717	Up	3.18532	3.46011	3.61055	11.8749	3.07782	14.5491	GeneID:364594,Genbank:XM_008771266.2,RGD:735171	toll-like receptor 3	GO:0005622,GO:0005737,GO:0005887,GO:0006952,GO:0007252,GO:0008584,GO:0034138,GO:0009615,GO:0034346,GO:0035458,GO:0009986,GO:0035690,GO:0042802,GO:0043065,GO:0043123,GO:0051607,GO:0043330,GO:0043331,GO:0071260,GO:0071346,GO:0071359,GO:0071360,GO:0001774,GO:0097191,GO:0002224,GO:0097527,GO:1901224,GO:0002730,GO:0002756,GO:0003725,GO:0004888,GO:0010628,GO:0032481,GO:0032722,GO:0032728,GO:0032735,GO:…	intracellular|cytoplasm|integral component of plasma membrane|defense response|I-kappaB phosphorylation|male gonad development|toll-like receptor 3 signaling pathway|response to virus|positive regulation of type III interferon production|cellular response to interferon-beta|cell surface|cellular response to drug|identical protein binding|positive regulation of apoptotic process|positive regulatio…	rno04217,rno04620,rno05164,rno05161,rno05160,rno05168,rno05167,rno05165	Necroptosis|Toll-like receptor signaling pathway|Influenza A|Hepatitis B|Hepatitis C|Herpes simplex infection|Kaposi's sarcoma-associated herpesvirus infection|Human papillomavirus infection
Tmem106a	999.1482622	198.2017675	1800.094757	9.082132716	3.183031119	0.024421173	0.689573968	Up	1.68473	1.83735	1.84835	15.1313	2.72671	26.7409	GeneID:287722,Genbank:XM_008767978.2,RGD:1309043	transmembrane protein 106A	GO:0016020,GO:0016021,GO:0003674,GO:0005575,GO:0008150	membrane|integral component of membrane|molecular_function|cellular_component|biological_process
Tmem182	99.78592277	141.2974954	58.27435012	0.412423093	-1.277802978	1.67E-05	0.013454988	Down	1.42454	1.37872	1.25657	0.263482	0.546599	0.753325	GeneID:501129,Genbank:NM_001109305.1,RGD:1563696	transmembrane protein 182	GO:0016021	integral component of membrane
Tmem229b	1013.451727	667.3064804	1359.596974	2.037440088	1.026757637	0.013630841	0.555980207	Up	2.01036	1.99983	2.05407	4.37236	2.38099	5.15869	GeneID:503035,Genbank:XM_017594316.1,RGD:1562622	transmembrane protein 229B	GO:0016021	integral component of membrane
Tmprss11a	87.1408518	121.9851449	52.29655868	0.428712518	-1.22191755	0.03881038	0.8154645	Down	1.39232	0.692294	0.786822	0.364713	0.194781	0.588316	GeneID:686581,Genbank:XM_008770103.1,RGD:1596322	transmembrane protease, serine 11A	GO:0004252,GO:0006508,GO:0016021	serine-type endopeptidase activity|proteolysis|integral component of membrane
Tnfrsf13b	90.38169381	129.257375	51.5060126	0.398476393	-1.327433837	1.94E-05	0.013454988	Down	0.770441	0.853453	0.862501	0.253864	0.425336	0.270334	GeneID:103693341,Genbank:NM_001305991.1,RGD:1595998	TNF receptor superfamily member 13B	GO:0002244,GO:0005886,GO:0005887,GO:0007166,GO:0009897,GO:0030889,GO:0038023,GO:0001782	hematopoietic progenitor cell differentiation|plasma membrane|integral component of plasma membrane|cell surface receptor signaling pathway|external side of plasma membrane|negative regulation of B cell proliferation|signaling receptor activity|B cell homeostasis	rno04060,rno04672,rno05340	Cytokine-cytokine receptor interaction|Intestinal immune network for IgA production|Primary immunodeficiency
Tnfrsf13c	51.46925394	70.23586774	32.70264014	0.465611677	-1.102800856	0.004626047	0.347975308	Down	0.792435	0.694597	0.97741	0.278277	0.587671	0.211975	GeneID:500910,Genbank:XM_576316.7,RGD:1560810	TNF receptor superfamily member 13C	GO:0016021,GO:0030890,GO:0031295,GO:0031296,GO:0042102,GO:0045078,GO:0050776,GO:0001782,GO:0002636,GO:0009897	integral component of membrane|positive regulation of B cell proliferation|T cell costimulation|B cell costimulation|positive regulation of T cell proliferation|positive regulation of interferon-gamma biosynthetic process|regulation of immune response|B cell homeostasis|positive regulation of germinal center formation|external side of plasma membrane	rno04064,rno04060,rno04672,rno05340,rno05166	NF-kappa B signaling pathway|Cytokine-cytokine receptor interaction|Intestinal immune network for IgA production|Primary immunodeficiency|HTLV-I infection
Tnfrsf14	182.5856661	247.5410366	117.6302955	0.475195132	-1.073408039	0.000482399	0.118885963	Down	1.41732	1.53326	1.18231	0.455385	0.864148	0.466315	GeneID:366518,Genbank:XM_006239587.3,RGD:1310115	TNF receptor superfamily member 14	GO:0046642,GO:0005575,GO:0050731,GO:0005887,GO:0050829,GO:0006954,GO:0006955,GO:0007275,GO:0008150,GO:0009897,GO:0050830,GO:0031625,GO:0097190,GO:0032496,GO:2000406,GO:0033209,GO:0002741,GO:0042127,GO:0003674,GO:0042981,GO:0005031	negative regulation of alpha-beta T cell proliferation|cellular_component|positive regulation of peptidyl-tyrosine phosphorylation|integral component of plasma membrane|defense response to Gram-negative bacterium|inflammatory response|immune response|multicellular organism development|biological_process|external side of plasma membrane|defense response to Gram-positive bacterium|ubiquitin protein…	rno04060,rno05168	Cytokine-cytokine receptor interaction|Herpes simplex infection
Tnfsf10	10914.14416	4760.972551	17067.31578	3.584838096	1.841907963	0.019213573	0.635813121	Up	26.647	33.9665	33.5294	121.189	40.7159	157.814	GeneID:246775,Genbank:XM_017590632.1,RGD:628734	tumor necrosis factor superfamily member 10	GO:0090200,GO:0005575,GO:2001238,GO:0006955,GO:0008270,GO:0008584,GO:0010469,GO:0016021,GO:0032813,GO:0032868,GO:0042802,GO:0043065,GO:0003674,GO:0043123,GO:0005125,GO:0043280,GO:0005164	positive regulation of release of cytochrome c from mitochondria|cellular_component|positive regulation of extrinsic apoptotic signaling pathway|immune response|zinc ion binding|male gonad development|regulation of signaling receptor activity|integral component of membrane|tumor necrosis factor receptor superfamily binding|response to insulin|identical protein binding|positive regulation of apopt…	rno04068,rno04060,rno04210,rno04217,rno04650,rno05162,rno05164	FoxO signaling pathway|Cytokine-cytokine receptor interaction|Apoptosis|Necroptosis|Natural killer cell mediated cytotoxicity|Measles|Influenza A
Tnnc1	269.4872962	386.0787682	152.8958242	0.396022358	-1.336346212	1.15E-08	4.30E-05	Down	11.8963	10.1222	10.5116	2.76797	4.328	4.88129	GeneID:290561,Genbank:NM_001034105.1,RGD:1309921	troponin C1, slow skeletal and cardiac type	GO:0043462,GO:0005509,GO:0048306,GO:0005861,GO:0006937,GO:0010038,GO:0051015,GO:0014883,GO:0031013,GO:0055010,GO:0031014,GO:0060048,GO:0032972,GO:0002086,GO:0042803,GO:0003009,GO:1990584,GO:0043292	regulation of ATPase activity|calcium ion binding|calcium-dependent protein binding|troponin complex|regulation of muscle contraction|response to metal ion|actin filament binding|transition between fast and slow fiber|troponin I binding|ventricular cardiac muscle tissue morphogenesis|troponin T binding|cardiac muscle contraction|regulation of muscle filament sliding speed|diaphragm contraction|pr…	rno04020,rno04260,rno04261,rno05410,rno05414	Calcium signaling pathway|Cardiac muscle contraction|Adrenergic signaling in cardiomyocytes|Hypertrophic cardiomyopathy (HCM)|Dilated cardiomyopathy (DCM)
Tnni3	751.3112464	1032.513562	470.1089312	0.455305333	-1.135093736	0.000344713	0.100173892	Down	39.9167	30.0384	29.4255	8.91567	15.1584	22.1744	GeneID:29248,Genbank:NM_017144.2,RGD:62052	troponin I3, cardiac type	GO:0060048,GO:0032780,GO:0010882,GO:0003779,GO:0043292,GO:0019855,GO:0005515,GO:0097512,GO:0046872,GO:0019901,GO:0005737,GO:1990584,GO:0048306,GO:0005861,GO:0006874,GO:0019904,GO:0006936,GO:0051015,GO:0030016,GO:0006937,GO:0055010,GO:0030017,GO:0060047,GO:0006940,GO:0001570,GO:0030172,GO:0006941,GO:0001980,GO:0031014,GO:0007507,GO:0003009	cardiac muscle contraction|negative regulation of ATPase activity|regulation of cardiac muscle contraction by calcium ion signaling|actin binding|contractile fiber|calcium channel inhibitor activity|protein binding|cardiac myofibril|metal ion binding|protein kinase binding|cytoplasm|cardiac Troponin complex|calcium-dependent protein binding|troponin complex|cellular calcium ion homeostasis|protei…	rno04024,rno04260,rno04261,rno05410,rno05414	cAMP signaling pathway|Cardiac muscle contraction|Adrenergic signaling in cardiomyocytes|Hypertrophic cardiomyopathy (HCM)|Dilated cardiomyopathy (DCM)
Tnni3k	45.3452325	62.82005121	27.87041379	0.443654745	-1.172490697	0.009205691	0.474866967	Down	0.291632	0.261296	0.119547	0.0755711	0.0785276	0.120051	GeneID:295531,Genbank:XM_008761563.2,RGD:727908	TNNI3 interacting kinase	GO:0055117,GO:0005737,GO:0002027,GO:0086069,GO:0006468,GO:0004672,GO:1903779,GO:0004674,GO:0004871,GO:0005524,GO:0008022,GO:0005634,GO:0031013,GO:0035556,GO:0046872	regulation of cardiac muscle contraction|cytoplasm|regulation of heart rate|bundle of His cell to Purkinje myocyte communication|protein phosphorylation|protein kinase activity|regulation of cardiac conduction|protein serine/threonine kinase activity|signal transducer activity|ATP binding|protein C-terminus binding|nucleus|troponin I binding|intracellular signal transduction|metal ion binding
Tnnt2	751.1808037	1060.748291	441.6133168	0.41632244	-1.264226772	9.61E-06	0.01059026	Down	11.4722	10.2392	10.3693	2.58154	3.60329	6.30332	GeneID:24837,Genbank:XM_006249840.3,RGD:3882	troponin T2, cardiac type	GO:0005737,GO:0005861,GO:0005865,GO:0030049,GO:0006936,GO:0030172,GO:0030674,GO:0030899,GO:0051764,GO:0031013,GO:0055009,GO:0055010,GO:0060048,GO:0003009,GO:0097512,GO:0003779,GO:1990584,GO:0005200,GO:0005509,GO:0005515,GO:0005523,GO:0006937,GO:0007507,GO:0008016,GO:0016887,GO:0032780,GO:0030016,GO:0032781,GO:0030017,GO:0032972,GO:0045214,GO:0051291,GO:0051592	cytoplasm|troponin complex|striated muscle thin filament|muscle filament sliding|muscle contraction|troponin C binding|protein binding, bridging|calcium-dependent ATPase activity|actin crosslink formation|troponin I binding|atrial cardiac muscle tissue morphogenesis|ventricular cardiac muscle tissue morphogenesis|cardiac muscle contraction|skeletal muscle contraction|cardiac myofibril|actin bindi…	rno04260,rno04261,rno05410,rno05414	Cardiac muscle contraction|Adrenergic signaling in cardiomyocytes|Hypertrophic cardiomyopathy (HCM)|Dilated cardiomyopathy (DCM)
Tor3a	935.5397402	228.8590908	1642.22039	7.175683447	2.843116248	0.027518353	0.722001738	Up	3.52361	2.79235	3.11209	22.2786	3.89219	35.9708	GeneID:304884,Genbank:NM_001009683.1,RGD:1310101	torsin family 3, member A	GO:0016887,GO:0005524,GO:0005783,GO:0005788	ATPase activity|ATP binding|endoplasmic reticulum|endoplasmic reticulum lumen
Tox2	208.5006063	285.5927199	131.4084926	0.460125499	-1.119900687	0.000917927	0.158655238	Down	1.75021	2.43122	2.77692	0.833806	1.431	0.700571	GeneID:311615,Genbank:XM_006235578.3,RGD:735184	TOX high mobility group box family member 2	GO:0045944,GO:0001077,GO:0001085,GO:0003682,GO:0005634,GO:0005654,GO:0006338,GO:0006355,GO:0006366,GO:0008585,GO:0000978,GO:0034698	positive regulation of transcription by RNA polymerase II|transcriptional activator activity, RNA polymerase II proximal promoter sequence-specific DNA binding|RNA polymerase II transcription factor binding|chromatin binding|nucleus|nucleoplasm|chromatin remodeling|regulation of transcription, DNA-templated|transcription by RNA polymerase II|female gonad development|RNA polymerase II proximal pro…
Trafd1	4970.897949	1847.521757	8094.27414	4.38115227	2.131310357	0.006286929	0.406048898	Up	15.0082	13.4957	14.4835	62.8995	26.4668	88.9012	GeneID:114635,Genbank:NM_053760.2,RGD:620171	TRAF type zinc finger domain containing 1	GO:0034097,GO:0045824,GO:0003674,GO:0005575,GO:0008270	response to cytokine|negative regulation of innate immune response|molecular_function|cellular_component|zinc ion binding
Trat1	25.85623933	43.05465148	8.657827187	0.201089241	-2.314092201	4.16E-05	0.024365268	Down	0.369746	0.578555	0.504916	0.0636046	0.149944	0.0501997	GeneID:498075,Genbank:NM_001037981.1,RGD:1563011	T cell receptor associated transmembrane adaptor 1	GO:0042101,GO:0050850,GO:0050862,GO:0051051,GO:0001920,GO:0005886,GO:0016021	T cell receptor complex|positive regulation of calcium-mediated signaling|positive regulation of T cell receptor signaling pathway|negative regulation of transport|negative regulation of receptor recycling|plasma membrane|integral component of membrane
Trdn	66.80789061	89.23898561	44.3767956	0.497280368	-1.007868618	0.00348215	0.295163279	Down	0.271698	0.304724	0.253246	0.0843133	0.144743	0.174548	GeneID:59299,Genbank:NM_021666.2,RGD:619856	triadin	GO:0005891,GO:0006874,GO:0006936,GO:0010649,GO:0010880,GO:0030674,GO:0031122,GO:0014070,GO:0034704,GO:0014701,GO:0042383,GO:0043231,GO:0044325,GO:0051280,GO:0051281,GO:0060047,GO:0005102,GO:0005515,GO:0005783,GO:0005829,GO:0005886,GO:0014808,GO:0014902,GO:0016021,GO:0016529,GO:0030314,GO:0060316,GO:0086036,GO:0090158,GO:1901846	voltage-gated calcium channel complex|cellular calcium ion homeostasis|muscle contraction|regulation of cell communication by electrical coupling|regulation of release of sequestered calcium ion into cytosol by sarcoplasmic reticulum|protein binding, bridging|cytoplasmic microtubule organization|response to organic cyclic compound|calcium channel complex|junctional sarcoplasmic reticulum membrane…
Trex1	700.5254187	251.6431367	1149.407701	4.567609972	2.191439464	0.018740313	0.629839145	Up	7.17668	6.57709	6.88227	33.9768	10.4982	48.6044	GeneID:100049583,Genbank:NM_001024989.1,RGD:1311998	three prime repair exonuclease 1	GO:0005829,GO:0006259,GO:0008296,GO:0008408,GO:0016021,GO:0032405,GO:0032407,GO:0032558,GO:0035458,GO:0042803,GO:0003690,GO:0090305,GO:0003697	cytosol|DNA metabolic process|3'-5'-exodeoxyribonuclease activity|3'-5' exonuclease activity|integral component of membrane|MutLalpha complex binding|MutSalpha complex binding|adenyl deoxyribonucleotide binding|cellular response to interferon-beta|protein homodimerization activity|double-stranded DNA binding|nucleic acid phosphodiester bond hydrolysis|single-stranded DNA binding	rno04623	Cytosolic DNA-sensing pathway
Trim21	4545.544927	1675.526707	7415.563147	4.425810174	2.145941574	0.010017263	0.487121994	Up	7.5286	8.29805	8.1516	39.2681	12.7935	50.079	GeneID:308901,Genbank:XM_006229885.2,RGD:1305795	tripartite motif-containing 21	GO:0045087,GO:0005654,GO:0045787,GO:0046598,GO:0005737,GO:0006513,GO:0008270,GO:0010508,GO:0016567,GO:0046872,GO:0019005,GO:0051091,GO:0031648,GO:0051865,GO:0032088,GO:0070206,GO:0032897,GO:0000209,GO:0090086,GO:0034341,GO:0004842,GO:1902187,GO:0042802,GO:0005634	innate immune response|nucleoplasm|positive regulation of cell cycle|positive regulation of viral entry into host cell|cytoplasm|protein monoubiquitination|zinc ion binding|positive regulation of autophagy|protein ubiquitination|metal ion binding|SCF ubiquitin ligase complex|positive regulation of DNA binding transcription factor activity|protein destabilization|protein autoubiquitination|negativ…	rno05322	Systemic lupus erythematosus
Trim25	3613.256135	2027.423086	5199.089184	2.564382946	1.358611719	0.001432148	0.200204257	Up	15.7878	15.9408	19.5421	48.8045	25.0388	49.4883	GeneID:494338,Genbank:NM_001009536.1,RGD:1594396	tripartite motif-containing 25	GO:1902187,GO:0043627,GO:0005654,GO:1990830,GO:0005737,GO:0045087,GO:0005829,GO:0006511,GO:0006513,GO:0008270,GO:0045296,GO:0016604,GO:0046596,GO:0046597,GO:0030433,GO:0051091,GO:0033280,GO:0003674,GO:0051092,GO:0036503,GO:0004842,GO:1902186,GO:0043123,GO:0005575	negative regulation of viral release from host cell|response to estrogen|nucleoplasm|cellular response to leukemia inhibitory factor|cytoplasm|innate immune response|cytosol|ubiquitin-dependent protein catabolic process|protein monoubiquitination|zinc ion binding|cadherin binding|nuclear body|regulation of viral entry into host cell|negative regulation of viral entry into host cell|ubiquitin-depe…	rno04064,rno04622,rno05164	NF-kappa B signaling pathway|RIG-I-like receptor signaling pathway|Influenza A
Trim29	16.92391239	25.1951644	8.652660376	0.343425438	-1.541931188	0.021132418	0.65792334	Down	0.203592	0.167999	0.195464	0.0631345	0.0855599	0.0466248	GeneID:300656,Genbank:NM_001106815.1,RGD:1307858	tripartite motif-containing 29	GO:0005913,GO:0008270,GO:0042802,GO:0098609,GO:0098641,GO:1900181,GO:0000122,GO:0002039,GO:0005737	cell-cell adherens junction|zinc ion binding|identical protein binding|cell-cell adhesion|cadherin binding involved in cell-cell adhesion|negative regulation of protein localization to nucleus|negative regulation of transcription by RNA polymerase II|p53 binding|cytoplasm
Trim30	2049.508138	574.7998707	3524.216405	6.131205981	2.616170874	0.004012494	0.319154541	Up	3.25577	3.35934	3.09664	20.4209	7.21667	28.5899	GeneID:499223,Genbank:XM_006229917.3,RGD:1563970	tripartite motif-containing 30
Trim30c	233.8689442	103.266577	364.4713113	3.529421832	1.819431869	0.017550551	0.615228429	Up	0.299012	0.316493	0.245568	1.12499	0.535926	1.63666	GeneID:102554102,Genbank:XM_006229915.3,RGD:1566132	tripartite motif-containing 30C	GO:0008270,GO:0016567,GO:0045087,GO:0051607,GO:0004842,GO:0005622,GO:0006914	zinc ion binding|protein ubiquitination|innate immune response|defense response to virus|ubiquitin-protein transferase activity|intracellular|autophagy
Trim5	2723.562141	1682.045754	3765.078528	2.238392457	1.162463006	0.014902732	0.572312991	Up	11.7567	11.608	10.7659	25.8989	13.6716	33.5914	GeneID:308906,Genbank:XM_006229912.3,RGD:1304579	tripartite motif-containing 5	GO:0045087,GO:0004842,GO:0046597,GO:0005737,GO:0051091,GO:0006914,GO:0008270,GO:0008329,GO:0019901,GO:0030674,GO:0051092,GO:0031664,GO:0051607,GO:0032880,GO:0070206,GO:0042802,GO:0070534,GO:0042803,GO:0000932,GO:1902187,GO:0043123,GO:0002218,GO:1990462,GO:0043410,GO:0002221	innate immune response|ubiquitin-protein transferase activity|negative regulation of viral entry into host cell|cytoplasm|positive regulation of DNA binding transcription factor activity|autophagy|zinc ion binding|signaling pattern recognition receptor activity|protein kinase binding|protein binding, bridging|positive regulation of NF-kappaB transcription factor activity|regulation of lipopolysac…
Trim55	53.14014774	74.06154612	32.21874936	0.435026691	-1.200824174	0.001757608	0.214387605	Down	0.693327	0.479366	0.461537	0.169054	0.203628	0.303647	GeneID:365751,Genbank:NM_001012218.1,RGD:1306943	tripartite motif-containing 55	GO:0042802,GO:0005634,GO:0005737,GO:0008270	identical protein binding|nucleus|cytoplasm|zinc ion binding
Trim69	120.4974021	50.18176735	190.8130368	3.802437556	1.926924556	0.019943804	0.644199836	Up	0.222618	0.157472	0.140292	0.737017	0.235324	0.966412	GeneID:311373,Genbank:NM_001013160.1,RGD:1305074	tripartite motif-containing 69	GO:0005634,GO:0005737,GO:0006915,GO:0016567,GO:0016607,GO:0046872,GO:0004842	nucleus|cytoplasm|apoptotic process|protein ubiquitination|nuclear speck|metal ion binding|ubiquitin-protein transferase activity
Tspan4	45.81339435	74.98763909	16.63914961	0.221891899	-2.1720711	0.020158982	0.644330598	Down	0.235502	0.205371	1.10162	0.138142	0.230635	0.1992	GeneID:293627,Genbank:NM_001013070.1,RGD:1305810	tetraspanin 4	GO:0005887,GO:0007166,GO:0031982,GO:0065003,GO:0003823,GO:0005178,GO:0005886	integral component of plasma membrane|cell surface receptor signaling pathway|vesicle|protein-containing complex assembly|antigen binding|integrin binding|plasma membrane
Txlnb	87.72935804	123.4908581	51.96785797	0.420823523	-1.248712745	0.001131183	0.17955132	Down	0.62238	0.562174	0.492938	0.113539	0.185174	0.357611	GeneID:308622,Genbank:XM_006227657.2,RGD:1307979	taxilin beta	GO:0005737,GO:0019905	cytoplasm|syntaxin binding
Uba7	2665.035365	343.7912263	4986.279504	14.50380092	3.858359123	0.004760318	0.352414045	Up	1.31155	1.59576	1.11196	20.6687	3.44604	32.4502	GeneID:301000,Genbank:NM_001106856.1,RGD:1308323	ubiquitin-like modifier activating enzyme 7	GO:0005737,GO:0006464,GO:0006511,GO:0006974,GO:0016567,GO:0019782,GO:0019941,GO:0032020,GO:0004839,GO:0004842,GO:0005524	cytoplasm|cellular protein modification process|ubiquitin-dependent protein catabolic process|cellular response to DNA damage stimulus|protein ubiquitination|ISG15 activating enzyme activity|modification-dependent protein catabolic process|ISG15-protein conjugation|ubiquitin activating enzyme activity|ubiquitin-protein transferase activity|ATP binding	rno04120,rno05012	Ubiquitin mediated proteolysis|Parkinson's disease
Ubash3a	72.20973603	96.63081392	47.78865814	0.494548852	-1.015815055	0.004674492	0.350212906	Down	0.446072	0.335746	0.407544	0.153992	0.291693	0.178347	GeneID:309666,Genbank:XM_006256215.3,RGD:1310305	ubiquitin associated and SH3 domain containing, A	GO:0005737,GO:0005794,GO:0009968,GO:0016791,GO:0038065,GO:0050860,GO:0070527,GO:0001817,GO:0005654	cytoplasm|Golgi apparatus|negative regulation of signal transduction|phosphatase activity|collagen-activated signaling pathway|negative regulation of T cell receptor signaling pathway|platelet aggregation|regulation of cytokine production|nucleoplasm
Ube2l6	612.6545614	113.0161346	1112.292988	9.841895515	3.2989362	0.000881808	0.158655238	Up	1.6614	1.93293	1.80737	21.4133	5.05459	22.3864	GeneID:295704,Genbank:NM_001024755.1,RGD:1307960	ubiquitin-conjugating enzyme E2L 6	GO:0019941,GO:0032020,GO:0042296,GO:0043130,GO:0005524,GO:0016567,GO:0019787	modification-dependent protein catabolic process|ISG15-protein conjugation|ISG15 transferase activity|ubiquitin binding|ATP binding|protein ubiquitination|ubiquitin-like protein transferase activity	rno04120,rno05012	Ubiquitin mediated proteolysis|Parkinson's disease
Upp1	1866.21453	840.3121596	2892.116901	3.441717305	1.783128602	0.025036541	0.694717654	Up	7.11132	9.11344	9.52876	29.2994	10.5688	42.3325	GeneID:289801,Genbank:XM_006251484.3,RGD:1305566	uridine phosphorylase 1	GO:0005654,GO:0005737,GO:0006218,GO:0006220,GO:0009166,GO:0042149,GO:0044206,GO:0046108,GO:0004850,GO:0005634	nucleoplasm|cytoplasm|uridine catabolic process|pyrimidine nucleotide metabolic process|nucleotide catabolic process|cellular response to glucose starvation|UMP salvage|uridine metabolic process|uridine phosphorylase activity|nucleus	rno00240,rno00983	Pyrimidine metabolism|Drug metabolism - other enzymes
Usp18	4495.565712	134.3504639	8856.780961	65.92296521	6.042709231	0.000274189	0.087043494	Up	1.85246	1.3266	1.48355	113.047	18.108	172.934	GeneID:312688,Genbank:NM_001014058.1,RGD:1359153	ubiquitin specific peptidase 18	GO:0016579,GO:0019785,GO:0035634,GO:0036459,GO:0050727,GO:0005634,GO:0005829,GO:0006511	protein deubiquitination|ISG15-specific protease activity|response to stilbenoid|thiol-dependent ubiquitinyl hydrolase activity|regulation of inflammatory response|nucleus|cytosol|ubiquitin-dependent protein catabolic process
Usp25	3791.145273	2253.01105	5329.279495	2.365403176	1.242086108	0.009343079	0.476115205	Up	5.59588	6.3249	7.11555	16.0179	7.98019	18.4207	GeneID:304150,Genbank:XM_006247999.3,RGD:1309003	ubiquitin specific peptidase 25	GO:0006511,GO:0016579,GO:0031625,GO:0051117,GO:0070536,GO:0071108,GO:1904293,GO:0004843,GO:0005783,GO:0005829	ubiquitin-dependent protein catabolic process|protein deubiquitination|ubiquitin protein ligase binding|ATPase binding|protein K63-linked deubiquitination|protein K48-linked deubiquitination|negative regulation of ERAD pathway|thiol-dependent ubiquitin-specific protease activity|endoplasmic reticulum|cytosol	rno04657	IL-17 signaling pathway
Vat1l	6.48304157	11.63267035	1.333412795	0.114626544	-3.124986932	0.010731186	0.510139864	Down	0.085193	0.0728006	0.0439625	0.0118376	0	0.0116958	GeneID:361414,Genbank:XM_003751883.4,RGD:1598315	vesicle amine transport 1-like	GO:0008270,GO:0016491,GO:0055114	zinc ion binding|oxidoreductase activity|oxidation-reduction process
Vcan	1199.935123	755.9845736	1643.885672	2.174496319	1.120681267	0.04157484	0.840925213	Up	1.00684	1.05714	1.23649	2.24226	1.24379	3.30074	GeneID:114122,Genbank:NM_053663.1,RGD:619940	versican	GO:0009986,GO:0005509,GO:0019903,GO:0005540,GO:0030169,GO:0005576,GO:0005578,GO:0005615,GO:0030246,GO:0031012,GO:0007155,GO:0007417,GO:0007507,GO:0001501,GO:0008347,GO:0001657,GO:0031103,GO:0009611,GO:0005201	cell surface|calcium ion binding|protein phosphatase binding|hyaluronic acid binding|low-density lipoprotein particle binding|extracellular region|proteinaceous extracellular matrix|extracellular space|carbohydrate binding|extracellular matrix|cell adhesion|central nervous system development|heart development|skeletal system development|glial cell migration|ureteric bud development|axon regenerat…	rno04514	Cell adhesion molecules (CAMs)
Vom2r4	6.803530346	11.23968997	2.367370724	0.210625981	-2.24724469	0.042395432	0.850178205	Down	0.0434843	0.059534	0.0773465	0	0.04249	0.028421	GeneID:308248,Genbank:NM_001099458.1,RGD:1564110	vomeronasal 2 receptor, 4
Wdr62	55.39088383	75.74899499	35.03277267	0.462484983	-1.112521573	0.003140434	0.283980713	Down	0.165906	0.189925	0.250041	0.045051	0.146337	0.0530165	GeneID:108348056,Genbank:XM_006228797.2	WD repeat domain 62
Wnt2b	329.840591	459.6499156	200.0312664	0.435181776	-1.200309954	0.013039512	0.54883159	Down	1.12042	0.992138	0.595983	0.378676	0.578481	0.179704	GeneID:116466,Genbank:XM_017590582.1,RGD:69346	wingless-type MMTV integration site family, member 2B	GO:0060070,GO:0005575,GO:0060492,GO:0005578,GO:0060638,GO:0005615,GO:0008150,GO:0008584,GO:0009267,GO:0016055,GO:0071425,GO:0090190,GO:0021871,GO:0090263,GO:0030182,GO:0043231,GO:0002062,GO:0003674,GO:0045165,GO:0005109	canonical Wnt signaling pathway|cellular_component|lung induction|proteinaceous extracellular matrix|mesenchymal-epithelial cell signaling|extracellular space|biological_process|male gonad development|cellular response to starvation|Wnt signaling pathway|hematopoietic stem cell proliferation|positive regulation of branching involved in ureteric bud morphogenesis|forebrain regionalization|positive…	rno04310,rno04390,rno04150,rno04550,rno04916,rno05200,rno05205,rno05225,rno05226,rno05217,rno05224,rno04934,rno05166,rno05165	Wnt signaling pathway|Hippo signaling pathway|mTOR signaling pathway|Signaling pathways regulating pluripotency of stem cells|Melanogenesis|Pathways in cancer|Proteoglycans in cancer|Hepatocellular carcinoma|Gastric cancer|Basal cell carcinoma|Breast cancer|Cushing's syndrome|HTLV-I infection|Human papillomavirus infection
XAF1	2297.202752	412.0991537	4182.30635	10.14878655	3.343235336	0.004021381	0.319154541	Up	4.40859	5.52941	5.67576	54.0648	15.2988	82.6622	GeneID:679600,Genbank:XM_006246855.2,RGD:1585988	XIAP associated factor-1	GO:0005739,GO:0006915,GO:0031333,GO:0034097,GO:0035456,GO:0005515,GO:0005634	mitochondrion|apoptotic process|negative regulation of protein complex assembly|response to cytokine|response to interferon-beta|protein binding|nucleus
Ypel1	96.69687452	133.2262553	60.1674937	0.451618891	-1.14682226	0.008895227	0.469831389	Down	0.755449	0.764982	1.47007	0.336243	0.5423	0.380401	GeneID:100360867,Genbank:XM_002727914.5,RGD:2321291	yippee-like 1	GO:0046872	metal ion binding
Zap70	131.925755	179.1363585	84.71515151	0.472908751	-1.080366257	0.00273955	0.265480308	Down	0.886906	0.641838	0.758841	0.214077	0.582368	0.285436	GeneID:301348,Genbank:NM_001012002.1,RGD:3983	zeta-chain (TCR) associated protein kinase 70	GO:0046641,GO:0042127,GO:0007169,GO:0004672,GO:0046777,GO:0043366,GO:0008150,GO:0004713,GO:0050850,GO:0045059,GO:0016020,GO:0004715,GO:0050852,GO:0045060,GO:0005102,GO:0005524,GO:0005575,GO:0018108,GO:0005737,GO:0045061,GO:0030154,GO:0005829,GO:0045087,GO:0031234,GO:0005886,GO:0045121,GO:0035556,GO:0005911,GO:0001772,GO:0045582,GO:0038083,GO:0006468,GO:0001784,GO:0046638,GO:0042101,GO:0006955,GO:…	positive regulation of alpha-beta T cell proliferation|regulation of cell proliferation|transmembrane receptor protein tyrosine kinase signaling pathway|protein kinase activity|protein autophosphorylation|beta selection|biological_process|protein tyrosine kinase activity|positive regulation of calcium-mediated signaling|positive thymic T cell selection|membrane|non-membrane spanning protein tyros…	rno04014,rno04064,rno04650,rno04660,rno04658,rno04659,rno05340	Ras signaling pathway|NF-kappa B signaling pathway|Natural killer cell mediated cytotoxicity|T cell receptor signaling pathway|Th1 and Th2 cell differentiation|Th17 cell differentiation|Primary immunodeficiency
Zbp1	227.7856741	42.47095772	413.1003905	9.726655877	3.281943877	0.027699051	0.724585497	Up	0.268854	0.138183	0.188009	2.05025	0.349887	4.14218	GeneID:171091,Genbank:XM_006235674.3,RGD:619956	Z-DNA binding protein 1	GO:0003723,GO:0003726,GO:0005634,GO:0005737,GO:0005829,GO:0042802,GO:0060340,GO:0003677,GO:0003692	RNA binding|double-stranded RNA adenosine deaminase activity|nucleus|cytoplasm|cytosol|identical protein binding|positive regulation of type I interferon-mediated signaling pathway|DNA binding|left-handed Z-DNA binding	rno04217,rno04623	Necroptosis|Cytosolic DNA-sensing pathway
Zc3hav1	6709.459933	3815.910732	9603.009134	2.516570698	1.331459128	0.00420288	0.326638762	Up	12.9266	13.5585	14.6433	36.3839	18.9352	41.8243	GeneID:252832,Genbank:XM_006236295.3,RGD:628694	zinc finger CCCH-type containing, antiviral 1	GO:0051607,GO:0043123,GO:0005634,GO:0061014,GO:0045071,GO:0005737,GO:0005764,GO:0005770,GO:0005829,GO:0009615,GO:0070212,GO:0045087,GO:0070403,GO:0045296,GO:0032481,GO:0071360,GO:0032727,GO:0003950,GO:1900246,GO:0046872,GO:0032728,GO:0050691,GO:0042802,GO:0005515	defense response to virus|positive regulation of I-kappaB kinase/NF-kappaB signaling|nucleus|positive regulation of mRNA catabolic process|negative regulation of viral genome replication|cytoplasm|lysosome|late endosome|cytosol|response to virus|protein poly-ADP-ribosylation|innate immune response|NAD+ binding|cadherin binding|positive regulation of type I interferon production|cellular response …
Znfx1	8887.338346	2184.080586	15590.5961	7.138287939	2.835578097	0.000356679	0.100350904	Up	5.22317	5.50406	5.63153	43.52	17.3591	53.9274	GeneID:296384,Genbank:XM_006235641.1,RGD:1306344	zinc finger, NFX1-type containing 1	GO:0008270,GO:0003700,GO:0005634,GO:0006355	zinc ion binding|DNA binding transcription factor activity|nucleus|regulation of transcription, DNA-templated
Zp2	51.22242475	71.80905471	30.63579479	0.426628576	-1.228947491	0.001720004	0.214387605	Down	0.329974	0.59455	0.665815	0.275766	0.154893	0.223003	GeneID:81828,Genbank:NM_031150.1,RGD:620605	zona pellucida glycoprotein 2	GO:0060046,GO:0016234,GO:0005771,GO:0060468,GO:0031012,GO:0005783,GO:0005886,GO:0032190,GO:0007339,GO:0042597,GO:0002455,GO:0042802,GO:0005576,GO:0016021,GO:0005578	regulation of acrosome reaction|inclusion body|multivesicular body|prevention of polyspermy|extracellular matrix|endoplasmic reticulum|plasma membrane|acrosin binding|binding of sperm to zona pellucida|periplasmic space|humoral immune response mediated by circulating immunoglobulin|identical protein binding|extracellular region|integral component of membrane|proteinaceous extracellular matrix
