# Supplementary material for: Comprehensive Analysis of the Profiles of Differentially Expressed mRNAs, lncRNAs, and circRNAs in Phosgene-Induced Acute Lung Injury
Source: Biomed Res Int. 2021 Jan 9;2021:6278526. doi: 10.1155/2021/6278526 (PMC7811572; doi:10.1155/2021/6278526)
Supplement: Supplementary 2 — Table S2: differentially expressed lncRNAs between the A and B group. [file 6278526.f2.txt]

Table S2 Differentially expressed lncRNAs between A and B group
lncRNA_id	BaseMean	BaseMean_control_A	BaseMean_case_B	FoldChange	log2FoldChange	pValue	qValue	Regulation	Expression_A1	Expression_A2	Expression_A3	Expression_B1	Expression_B2	Expression_B3	Chrom	Start	End	Strand	lncRNA_symbol	partnerRNA_transcript	distance	direction	type	location	subtype	partnerRNA_gene	Dbxref	product	GO_id	GO_term	pathway	pathway_description
ENSRNOT00000076236	59.18562937	102.2496606	16.12159814	0.157668965	-2.665029383	6.02E-05	0.031464297	Down	4.92931	6.204977	3.080316	1.549335	0.396242	0.000160051	Chr7	116373323	116376897	-	AABR07058441.1	XM_017595247.1	0	sense	genic	exonic	nested	LOC300024	GeneID:300024,Genbank:XM_017595247.1,RGD:1586182	similar to Ly6-B antigen gene, transcript variant X1
ENSRNOT00000077381	50.31899809	88.68391239	11.9540838	0.134794276	-2.891168856	0.034376584	1	Down	1.8701	1.96008	0.07743273	0.02318765	0.06010929	0.3994099	Chr12	21366528	21373076	-	AABR07035717.1	XM_017598613.1	3609	sense	intergenic	upstream	same_strand	LOC108348155	GeneID:108348155,Genbank:XM_017598613.1	paired immunoglobulin-like type 2 receptor beta-2, transcript variant X1	GO:0007169,GO:0016021,GO:0042288	transmembrane receptor protein tyrosine kinase signaling pathway|integral component of membrane|MHC class I protein binding
ENSRNOT00000078681	3.048316633	6.096633266	0	0	#NAME?	0.024988031	1	Down	0.02882851	0.674612	0.7815969	2.86E-17	1.33E-18	0	Chr6	143749414	143749950	-	AABR07065889.2
ENSRNOT00000081264	7.577974	14.84375928	0.312188723	0.021031648	-5.571294277	0.00071068	0.197347076	Down	0.3730291	0.9667841	0.3235043	9.32E-05	0.04680826	0.000147526	Chr3	17648356	17649526	+	AABR07051592.1
ENSRNOT00000083554	12.78904714	20.56128457	5.016809708	0.24399301	-2.035088278	0.043985407	1	Down	0.2335091	0.178463	0.2408797	0.000303692	0.1398015	0.02426754	Chr6	125276633	125295391	-	AABR07065387.1	XM_017594543.1	0	sense	genic	intronic	nested	Catsperb	GeneID:100910102,Genbank:XM_017594543.1,RGD:6500065	cation channel sperm associated auxiliary subunit beta, transcript variant X1	GO:0005929,GO:0036128	cilium|CatSper complex
ENSRNOT00000084015	38.57054983	19.49637045	57.64472921	2.956690291	1.563983131	0.032260471	1	Up	0.9518012	1.279188	1.669906	2.758229	6.560922	2.181519	Chr17	37687355	37911332	+	AABR07027581.1	XM_006253902.3	11125	sense	intergenic	downstream	same_strand	RGD1563300	GeneID:306926,Genbank:XM_006253902.3,RGD:1563300	similar to 60S ribosomal protein L29 (P23)	GO:0002181,GO:0003735,GO:0022625	cytoplasmic translation|structural constituent of ribosome|cytosolic large ribosomal subunit
ENSRNOT00000084474	3.603777265	7.20755453	0	0	#NAME?	0.011890465	1	Down	0.04912635	0.3055855	0.121479	1.05E-16	3.23E-25	3.09E-31	Chr15	30218106	30219999	-	AABR07017701.1	XM_017599875.1	42578	sense	intergenic	upstream	same_strand	LOC688340	GeneID:688340,Genbank:XM_017599875.1	T-cell receptor alpha chain V region PHDS58-like, transcript variant X1
ENSRNOT00000085679	36.24140545	59.22536996	13.25744093	0.22384733	-2.159412985	0.017899861	1	Down	10.18186	5.153984	2.595975	3.166739	4.22E-17	0.1959901	ChrX	158581631	158582269	+	AABR07042514.3	XM_006257666.2	11742	sense	intergenic	downstream	same_strand	LOC102550080	GeneID:102550080,Genbank:XM_006257666.2,RGD:7688773	placenta-specific protein 1-like, transcript variant X1	GO:0001890,GO:0005576	placenta development|extracellular region
ENSRNOT00000086200	4.721670149	0.353447036	9.089893262	25.717837	4.684697405	0.012027927	1	Up	9.96E-27	8.47E-07	0.07672586	0.2206684	0.3928147	1.180526	Chr14	5618162	5650911	+	AABR07014218.1	NM_001037205.1	0	antisense	genic	intronic	nested	Abcg3l4	GeneID:360997,Genbank:NM_001037205.1,RGD:1588538	ATP-binding cassette, subfamily G (WHITE), member 3-like 4
ENSRNOT00000086676	7.504099935	1.950522028	13.05767784	6.694452897	2.742966156	0.032666189	1	Up	0.1784275	0.1625621	0.1561857	1.81438	1.146379	0.3165886	Chr7	65729095	65731532	-	AABR07057325.1	XM_008765435.2	0	sense	genic	exonic	nested	LOC103690058	GeneID:103690058,Genbank:XM_008765435.2,RGD:9211942	uncharacterized LOC103690058
ENSRNOT00000087589	19.30019579	0.706894072	37.89349751	53.60562353	5.74431245	0.009096936	1	Up	3.83E-09	0.008529168	0.06030629	1.045101	5.66E-05	2.121794	Chr14	61650937	61668509	+	LOC100910750	XM_003751372.3	0	sense	genic	exonic	containing	LOC100910750	GeneID:100910750,Genbank:XM_003751372.3,RGD:6497185	putative pre-mRNA-splicing factor ATP-dependent RNA helicase DHX15-like
ENSRNOT00000088094	3.368586996	6.737173993	0	0	#NAME?	0.016741114	1	Down	2.33E-21	0.9977874	0.960378	2.86E-14	0.02627777	4.54E-21	Chr2	32530316	32553340	-	AABR07007878.1	XM_017591364.1	11264	sense	intergenic	upstream	same_strand	Mast4	GeneID:100912235,Genbank:XM_017591364.1,RGD:1310139	microtubule associated serine/threonine kinase family member 4, transcript variant X1	GO:0005524,GO:0005622,GO:0006468,GO:0007010,GO:0018105,GO:0035556,GO:0000287,GO:0004674	ATP binding|intracellular|protein phosphorylation|cytoskeleton organization|peptidyl-serine phosphorylation|intracellular signal transduction|magnesium ion binding|protein serine/threonine kinase activity
ENSRNOT00000088470	9.459546776	2.303969064	16.61512449	7.211522388	2.850303852	0.031502618	1	Up	0.2144449	0.2075253	0.2467816	0.1942856	2.109978	2.646174	Chr7	38667228	38679464	+	AABR07056730.1	NM_024129.1	62786	sense	intergenic	upstream	same_strand	Dcn	GeneID:29139,Genbank:NM_024129.1,RGD:61895	decorin	GO:0045944,GO:0014068,GO:0005518,GO:0046426,GO:0016239,GO:0005539,GO:0047485,GO:0016525,GO:0005576,GO:0050840,GO:0005578,GO:0005589,GO:0005615,GO:0005737,GO:0019221,GO:0006469,GO:0051901,GO:0019800,GO:0007519,GO:0090141,GO:0031012,GO:0007568,GO:1900747,GO:0009612,GO:0001822,GO:0032496,GO:0010508,GO:0001890,GO:0042060,GO:0010596,GO:0004860	positive regulation of transcription by RNA polymerase II|positive regulation of phosphatidylinositol 3-kinase signaling|collagen binding|negative regulation of JAK-STAT cascade|positive regulation of macroautophagy|glycosaminoglycan binding|protein N-terminus binding|negative regulation of angiogenesis|extracellular region|extracellular matrix binding|proteinaceous extracellular matrix|collagen …	rno04350,rno05205	TGF-beta signaling pathway|Proteoglycans in cancer
ENSRNOT00000089143	11.23199983	22.11368652	0.350313148	0.015841463	-5.980150605	2.78E-05	0.017664084	Down	2.161759	2.644296	1.199407	0.06336345	2.52E-61	3.09E-35	Chr15	30883449	30884109	+	AABR07017770.2
ENSRNOT00000090331	651.1540002	364.678747	937.6292534	2.57111022	1.362391458	0.013217571	1	Up	20.13	21.18103	21.80482	52.35441	36.83003	65.18838	Chr12	22601608	22605139	+	AABR07035796.1	XM_017598596.1	16833	sense	intergenic	downstream	same_strand	Muc3	GeneID:687030,Genbank:XM_017598596.1,RGD:3124	mucin 3, intestinal, transcript variant X1	GO:0009725,GO:0016324,GO:0033189,GO:0003674,GO:0005737,GO:0005902	response to hormone|apical plasma membrane|response to vitamin A|molecular_function|cytoplasm|microvillus
ENSRNOT00000090535	21.07035435	0	42.14070871	Inf	Inf	0.03186669	1	Up	0	0	0	1.230927	2.43E-59	8.567479	Chr2	248544104	248545549	+	AABR07013653.1	XM_017591401.1	0	sense	genic	exonic	nested	RGD1560801	GeneID:288456,Genbank:XM_017591401.1,RGD:1560801	similar to guanylate binding protein 1, interferon-inducible, 67kDa, transcript variant X1			rno04621	NOD-like receptor signaling pathway
ENSRNOT00000092503	249.9838228	79.39988398	420.5677617	5.296830935	2.405129461	0.02909066	1	Up	2.535213	4.050519	1.929703	20.98901	3.687196	16.44301	Chr20	5490521	5499010	-	AA926063	XM_006256108.3	4559	sense	intergenic	upstream	same_strand	Daxx	GeneID:140926,Genbank:XM_006256108.3,RGD:621227	death-domain associated protein, transcript variant X2	GO:0002039,GO:0003713,GO:0003714,GO:0005515,GO:0006351,GO:0005634,GO:0006355,GO:0008134,GO:0008432,GO:0010038,GO:0030521,GO:0010832,GO:0016604,GO:0030578,GO:0016605,GO:0031396,GO:0031625,GO:0000122,GO:0042393,GO:0000281,GO:0042803,GO:0032147,GO:0000775,GO:0032183,GO:0043005,GO:0000792,GO:0043065,GO:0043066,GO:0001741,GO:0044297,GO:0001934,GO:0071276,GO:0045860,GO:0045892,GO:0071280,GO:0071356,GO:…	p53 binding|transcription coactivator activity|transcription corepressor activity|protein binding|transcription, DNA-templated|nucleus|regulation of transcription, DNA-templated|transcription factor binding|JUN kinase binding|response to metal ion|androgen receptor signaling pathway|negative regulation of myotube differentiation|nuclear body|PML body organization|PML body|regulation of protein ub…	rno04010,rno04210,rno05014,rno05168	MAPK signaling pathway|Apoptosis|Amyotrophic lateral sclerosis (ALS)|Herpes simplex infection
NR_002155.1	90.73708216	51.71964923	129.7545151	2.50880501	1.327000345	0.031160554	1	Up	3.025203	1.298889	2.124423	4.920302	3.017835	7.146656	Chr20	4676851	4677801	-	RT1-CE6	NM_001008845.1	17964	sense	intergenic	downstream	same_strand	RT1-CE7	GeneID:368153,Genbank:NM_001008845.1,RGD:1595786	RT1 class I, locus CE7	GO:0016021	integral component of membrane	rno04514,rno04144,rno04145,rno04218,rno04650,rno04612,rno05203,rno05320,rno05330,rno05332,rno05416,rno04940,rno05166,rno05168,rno05167,rno05169,rno05165	Cell adhesion molecules (CAMs)|Endocytosis|Phagosome|Cellular senescence|Natural killer cell mediated cytotoxicity|Antigen processing and presentation|Viral carcinogenesis|Autoimmune thyroid disease|Allograft rejection|Graft-versus-host disease|Viral myocarditis|Type I diabetes mellitus|HTLV-I infection|Herpes simplex infection|Kaposi's sarcoma-associated herpesvirus infection|Epstein-Barr virus …
NR_102352.1	6891.935991	2186.070666	11597.80132	5.305318578	2.407439386	0.021097531	1	Up	115.134	103.0694	109.3776	554.2556	157.0629	925.2959	Chr1	227110936	227113844	-	LOC100910973	NM_001108519.1	22310	sense	intergenic	downstream	same_strand	Ms4a8	GeneID:361733,Genbank:NM_001108519.1,RGD:1309035	membrane spanning 4-domains A8	GO:0016021	integral component of membrane
NR_110672.1	1072.964925	491.8128762	1654.116974	3.363305546	1.749879849	0.044466218	1	Up	41.35801	42.95127	45.13105	128.6	51.46385	234.412	Chr3	163815320	163817911	+	LOC100911177	NM_001047860.1	0	antisense	genic	intronic	nested	Znfx1	GeneID:296384,Genbank:NM_001047860.1,RGD:1306344	zinc finger, NFX1-type containing 1	GO:0008270,GO:0003700,GO:0005634,GO:0006355	zinc ion binding|DNA binding transcription factor activity|nucleus|regulation of transcription, DNA-templated
TCONS_00000064	12.38168331	1.060341108	23.70302552	22.35415126	4.482470865	0.002848231	0.47753544	Up	1.65E-08	0.006218145	0.1501255	1.322839	1.695505	0.1710051	Chr1	11905594	11971362	+	XLOC_000032	NM_001025002.1	0	antisense	genic	intronic	containing	LOC310926	GeneID:310926,Genbank:NM_001025002.1,RGD:1560890	hypothetical protein LOC310926
TCONS_00000355	33.48216992	49.46345612	17.50088372	0.353814413	-1.498935274	0.043260328	1	Down	1.001744	2.604621	2.110303	0.5118503	1.134276	0.3756298	Chr1	51455843	51462749	+
TCONS_00000804	31.1350455	14.95478566	47.31530534	3.16389057	1.661699702	0.020831661	1	Up	0.8656041	1.052173	1.755804	3.130898	4.715117	3.957813	Chr1	91746379	91747194	+	XLOC_000352	XM_017590065.1	0	antisense	genic	intronic	nested	Tdrd12	GeneID:689639,Genbank:XM_017590065.1,RGD:1562792	tudor domain containing 12, transcript variant X4	GO:0005575,GO:0007140,GO:0007283,GO:0008150,GO:0009566,GO:0031047,GO:0034587,GO:0043046,GO:1903955,GO:1990923,GO:0003674,GO:0003676,GO:0005524	cellular_component|male meiotic nuclear division|spermatogenesis|biological_process|fertilization|gene silencing by RNA|piRNA metabolic process|DNA methylation involved in gamete generation|positive regulation of protein targeting to mitochondrion|PET complex|molecular_function|nucleic acid binding|ATP binding
TCONS_00001104	26.96374078	45.62714596	8.300335599	0.181916607	-2.45865084	0.019214586	1	Down	0.1813325	0.9140548	0.617292	0.1547884	0.146517	0.000107007	Chr1	153530506	153598327	+	XLOC_000496	NM_022623.2	0	sense	genic	exonic	overlapping	Fzd4	GeneID:64558,Genbank:NM_022623.2,RGD:71017	frizzled class receptor 4	GO:0007223,GO:0007605,GO:0008150,GO:0009986,GO:0010812,GO:0016021,GO:0016055,GO:0035567,GO:0038023,GO:0017147,GO:0042701,GO:0042803,GO:0042813,GO:0043507,GO:0045893,GO:0046982,GO:0001540,GO:0001553,GO:0001568,GO:0001570,GO:0004930,GO:0005575,GO:0005886,GO:0005911,GO:0007186,GO:0019955,GO:0030165,GO:0030425,GO:0030947,GO:0031625,GO:0051091,GO:0031987,GO:0060070,GO:0034446,GO:0035426,GO:0061299,GO:…	Wnt signaling pathway, calcium modulating pathway|sensory perception of sound|biological_process|cell surface|negative regulation of cell-substrate adhesion|integral component of membrane|Wnt signaling pathway|non-canonical Wnt signaling pathway|signaling receptor activity|Wnt-protein binding|progesterone secretion|protein homodimerization activity|Wnt-activated receptor activity|positive regulat…	rno04310,rno04390,rno04150,rno04550,rno04916,rno05200,rno05205,rno05225,rno05226,rno05217,rno05224,rno04934,rno05166,rno05165	Wnt signaling pathway|Hippo signaling pathway|mTOR signaling pathway|Signaling pathways regulating pluripotency of stem cells|Melanogenesis|Pathways in cancer|Proteoglycans in cancer|Hepatocellular carcinoma|Gastric cancer|Basal cell carcinoma|Breast cancer|Cushing's syndrome|HTLV-I infection|Human papillomavirus infection
TCONS_00001344	34.58879834	7.04594799	62.13164869	8.818068028	3.140462607	0.003500869	0.56445558	Up	6.53E-06	0.6812799	4.47E-07	0.5937577	2.220909	2.981067	Chr1	178897246	178935806	+	XLOC_000582	XM_017589664.1	0	sense	genic	exonic	overlapping	Spon1	GeneID:64456,Genbank:XM_017589664.1,RGD:619918	spondin 1, transcript variant X1	GO:0007155,GO:0031012,GO:0046872,GO:0005578,GO:0005615	cell adhesion|extracellular matrix|metal ion binding|proteinaceous extracellular matrix|extracellular space
TCONS_00002037	295.0831731	152.5507993	437.615547	2.868654565	1.520374254	0.008246161	0.94413353	Up	3.817469	2.265632	2.032888	7.646565	4.335122	9.461874	Chr1	228721092	228729646	+	XLOC_000851	XM_008760261.1	0	sense	genic	exonic	containing	Mpeg1	GeneID:64552,Genbank:XM_008760261.1,RGD:69275	macrophage expressed 1, transcript variant X1	GO:0016021	integral component of membrane
TCONS_00002048	236.4991019	135.90809	337.0901138	2.480279973	1.310502981	0.02027585	1	Up	0.6427437	0.4466161	0.5231317	0.9853328	1.243838	1.57836	Chr1	235197968	235216460	+	XLOC_000859	XM_008760288.2	0	sense	genic	intronic	nested	Gna14	GeneID:309242,Genbank:XM_008760288.2,RGD:1308122	G protein subunit alpha 14, transcript variant X1	GO:0004871,GO:0005525,GO:0005575,GO:0005834,GO:0007188,GO:0008150,GO:0031683,GO:0060158,GO:0001664,GO:0003674,GO:0003924	signal transducer activity|GTP binding|cellular_component|heterotrimeric G-protein complex|adenylate cyclase-modulating G-protein coupled receptor signaling pathway|biological_process|G-protein beta/gamma-subunit complex binding|phospholipase C-activating dopamine receptor signaling pathway|G-protein coupled receptor binding|molecular_function|GTPase activity	rno04020,rno05146,rno05142	Calcium signaling pathway|Amoebiasis|Chagas disease (American trypanosomiasis)
TCONS_00003494	41.59342848	20.33066731	62.85618966	3.091693386	1.628397249	0.01987846	1	Up	0.8616815	0.3616425	0.5702287	1.809808	0.9944804	2.429277	Chr1	140598375	140601605	-	XLOC_001497	NM_001008510.1	948	antisense	intergenic	upstream	divergent	Isg20	GeneID:293052,Genbank:NM_001008510.1,RGD:1306407	interferon stimulated exonuclease gene 20	GO:0090503,GO:0005634,GO:0005730,GO:0005737,GO:0006401,GO:0008310,GO:0009615,GO:0015030,GO:0016605,GO:0030619,GO:0030620,GO:0034511,GO:0000175,GO:0045071,GO:0000738,GO:0051607,GO:0004527	RNA phosphodiester bond hydrolysis, exonucleolytic|nucleus|nucleolus|cytoplasm|RNA catabolic process|single-stranded DNA 3'-5' exodeoxyribonuclease activity|response to virus|Cajal body|PML body|U1 snRNA binding|U2 snRNA binding|U3 snoRNA binding|3'-5'-exoribonuclease activity|negative regulation of viral genome replication|DNA catabolic process, exonucleolytic|defense response to virus|exonuclea…
TCONS_00005424	19.63730792	37.59929895	1.67531689	0.044557131	-4.488199847	8.40E-06	0.010660465	Down	2.293411	1.83145	3.227817	0.1685081	0.1296557	1.01E-12	Chr10	55661994	55679400	+	XLOC_002343	NM_012663.2	0	sense	genic	exonic	overlapping	Vamp2	GeneID:24803,Genbank:NM_012663.2,RGD:3949	vesicle-associated membrane protein 2	GO:0005802,GO:0005886,GO:0006887,GO:0006906,GO:0008021,GO:0017157,GO:0008022,GO:0008076,GO:0009749,GO:0019905,GO:0030054,GO:0030136,GO:0031982,GO:0032869,GO:0030141,GO:0035493,GO:0042589,GO:0042802,GO:0043001,GO:0043005,GO:0000149,GO:0060627,GO:0043195,GO:0061025,GO:0043229,GO:0065003,GO:0043231,GO:0070032,GO:0000322,GO:0070033,GO:0005484,GO:0070044,GO:0005515,GO:0005516,GO:0005543,GO:0070254,GO:…	trans-Golgi network|plasma membrane|exocytosis|vesicle fusion|synaptic vesicle|regulation of exocytosis|protein C-terminus binding|voltage-gated potassium channel complex|response to glucose|syntaxin binding|cell junction|clathrin-coated vesicle|vesicle|cellular response to insulin stimulus|secretory granule|SNARE complex assembly|zymogen granule membrane|identical protein binding|Golgi to plasma…	rno04130,rno04911,rno04970,rno04962,rno04721	SNARE interactions in vesicular transport|Insulin secretion|Salivary secretion|Vasopressin-regulated water reabsorption|Synaptic vesicle cycle
TCONS_00006065	59.89618422	32.86293095	86.92943748	2.645212553	1.403383653	0.027416225	1	Up	1.447827	1.525407	1.972238	3.450047	3.303121	6.005618	Chr10	89358367	89435421	+	XLOC_002595	NM_001009625.1	0	sense	genic	exonic	containing	Ifi35	GeneID:287719,Genbank:NM_001009625.1,RGD:1304553	interferon-induced protein 35	GO:0005634	nucleus
TCONS_00007241	4.685131628	9.370263255	0	0	#NAME?	0.003204101	0.527252568	Down	0.194326	0.3502245	0.1622998	0.006683793	0.005197743	0.004335785	Chr10	67733783	67737960	-	XLOC_003124	NM_001139506.1	171	sense	intergenic	downstream	same_strand	RGD1310429	GeneID:303764,Genbank:NM_001139506.1,RGD:1310429	similar to Protein Njmu-R1
TCONS_00007918	6.274314605	12.54862921	0	0	#NAME?	0.007448272	0.894396534	Down	0.7675199	6.66E-18	0.8865751	0.000263949	1.58E-06	1.20E-21	Chr10	109416673	109446758	-	XLOC_003415	XM_008768494.2	0	antisense	genic	intronic	overlapping	Bahcc1	GeneID:360674,Genbank:XM_008768494.2,RGD:1306500	BAH domain and coiled-coil containing 1, transcript variant X1	GO:0005654,GO:0005677,GO:0006342,GO:0031507,GO:0000785,GO:0000976,GO:0003682	nucleoplasm|chromatin silencing complex|chromatin silencing|heterochromatin assembly|chromatin|transcription regulatory region sequence-specific DNA binding|chromatin binding
TCONS_00008340	471.2755666	49.83603209	892.7151011	17.91304531	4.162938719	0.004464384	0.639846997	Up	0.005087234	2.02E-15	11.10897	98.28749	7.307687	102.3998	Chr11	67715039	67772425	+	XLOC_003596	NM_001109053.1	0	sense	genic	exonic	overlapping	Dtx3l	GeneID:498089,Genbank:NM_001109053.1,RGD:1565144	deltex E3 ubiquitin ligase 3L	GO:1901666,GO:0035563,GO:0008047,GO:0005634,GO:1902966,GO:0042393,GO:0008333,GO:2000646,GO:0044389,GO:0010390,GO:0005654,GO:2001034,GO:0045893,GO:0005737,GO:0005764,GO:0005769,GO:0019899,GO:0005829,GO:0051444,GO:0032092,GO:0051865,GO:0032991,GO:0006302,GO:0070936,GO:0006511,GO:0002230,GO:0097677,GO:0033522,GO:0004842,GO:1900182,GO:0033523,GO:0006974,GO:0004857	positive regulation of NAD+ ADP-ribosyltransferase activity|positive regulation of chromatin binding|enzyme activator activity|nucleus|positive regulation of protein localization to early endosome|histone binding|endosome to lysosome transport|positive regulation of receptor catabolic process|ubiquitin-like protein ligase binding|histone monoubiquitination|nucleoplasm|positive regulation of doubl…	rno04330	Notch signaling pathway
TCONS_00008343	234.5963719	3.821564051	465.3711797	121.7750569	6.928074847	0.001054867	0.248313804	Up	0.000227452	0.03176321	0.1747197	9.622268	0.002737024	17.47367	Chr11	67740491	67772428	+	XLOC_003596	NM_001109053.1	0	sense	genic	exonic	containing	Dtx3l	GeneID:498089,Genbank:NM_001109053.1,RGD:1565144	deltex E3 ubiquitin ligase 3L	GO:1901666,GO:0035563,GO:0008047,GO:0005634,GO:1902966,GO:0042393,GO:0008333,GO:2000646,GO:0044389,GO:0010390,GO:0005654,GO:2001034,GO:0045893,GO:0005737,GO:0005764,GO:0005769,GO:0019899,GO:0005829,GO:0051444,GO:0032092,GO:0051865,GO:0032991,GO:0006302,GO:0070936,GO:0006511,GO:0002230,GO:0097677,GO:0033522,GO:0004842,GO:1900182,GO:0033523,GO:0006974,GO:0004857	positive regulation of NAD+ ADP-ribosyltransferase activity|positive regulation of chromatin binding|enzyme activator activity|nucleus|positive regulation of protein localization to early endosome|histone binding|endosome to lysosome transport|positive regulation of receptor catabolic process|ubiquitin-like protein ligase binding|histone monoubiquitination|nucleoplasm|positive regulation of doubl…	rno04330	Notch signaling pathway
TCONS_00008344	234.5963719	3.821564051	465.3711797	121.7750569	6.928074847	0.001054867	0.248313804	Up	0.000227452	0.03176321	0.1747197	9.622268	0.002737024	17.47367	Chr11	67740491	67772428	+	XLOC_003596	NM_001109053.1	0	sense	genic	exonic	containing	Dtx3l	GeneID:498089,Genbank:NM_001109053.1,RGD:1565144	deltex E3 ubiquitin ligase 3L	GO:1901666,GO:0035563,GO:0008047,GO:0005634,GO:1902966,GO:0042393,GO:0008333,GO:2000646,GO:0044389,GO:0010390,GO:0005654,GO:2001034,GO:0045893,GO:0005737,GO:0005764,GO:0005769,GO:0019899,GO:0005829,GO:0051444,GO:0032092,GO:0051865,GO:0032991,GO:0006302,GO:0070936,GO:0006511,GO:0002230,GO:0097677,GO:0033522,GO:0004842,GO:1900182,GO:0033523,GO:0006974,GO:0004857	positive regulation of NAD+ ADP-ribosyltransferase activity|positive regulation of chromatin binding|enzyme activator activity|nucleus|positive regulation of protein localization to early endosome|histone binding|endosome to lysosome transport|positive regulation of receptor catabolic process|ubiquitin-like protein ligase binding|histone monoubiquitination|nucleoplasm|positive regulation of doubl…	rno04330	Notch signaling pathway
TCONS_00008354	100.3932217	30.35429092	170.4321525	5.614763098	2.489225153	6.94E-05	0.033932579	Up	0.5136975	0.16643	0.6351502	2.294856	1.674852	3.212027	Chr11	67863491	68137484	+	XLOC_003597	NM_001191659.1	0	sense	genic	exonic	overlapping	Parp14	GeneID:303903,Genbank:NM_001191659.1,RGD:1310490	poly (ADP-ribose) polymerase family, member 14	GO:0005829,GO:0006471,GO:0010629,GO:0019899,GO:0042531,GO:0042532,GO:0060336,GO:0070212,GO:0070403,GO:1902216,GO:0003950,GO:0005737	cytosol|protein ADP-ribosylation|negative regulation of gene expression|enzyme binding|positive regulation of tyrosine phosphorylation of STAT protein|negative regulation of tyrosine phosphorylation of STAT protein|negative regulation of interferon-gamma-mediated signaling pathway|protein poly-ADP-ribosylation|NAD+ binding|positive regulation of interleukin-4-mediated signaling pathway|NAD+ ADP-r…
TCONS_00008355	67.89494002	11.7071128	124.0827672	10.5989213	3.405845537	0.00509108	0.695989764	Up	3.12E-11	0.3476344	0.2543372	2.910148	0.4810353	2.845476	Chr11	67863873	68137484	+	XLOC_003597	NM_001191659.1	0	sense	genic	exonic	overlapping	Parp14	GeneID:303903,Genbank:NM_001191659.1,RGD:1310490	poly (ADP-ribose) polymerase family, member 14	GO:0005829,GO:0006471,GO:0010629,GO:0019899,GO:0042531,GO:0042532,GO:0060336,GO:0070212,GO:0070403,GO:1902216,GO:0003950,GO:0005737	cytosol|protein ADP-ribosylation|negative regulation of gene expression|enzyme binding|positive regulation of tyrosine phosphorylation of STAT protein|negative regulation of tyrosine phosphorylation of STAT protein|negative regulation of interferon-gamma-mediated signaling pathway|protein poly-ADP-ribosylation|NAD+ binding|positive regulation of interleukin-4-mediated signaling pathway|NAD+ ADP-r…
TCONS_00008356	81.33381585	16.15241731	146.5152144	9.070791791	3.181228489	0.000585874	0.179519799	Up	0.265006	0.5661755	0.04396827	3.435251	1.249832	2.60241	Chr11	67863873	68137484	+	XLOC_003597	NM_001191659.1	0	sense	genic	exonic	overlapping	Parp14	GeneID:303903,Genbank:NM_001191659.1,RGD:1310490	poly (ADP-ribose) polymerase family, member 14	GO:0005829,GO:0006471,GO:0010629,GO:0019899,GO:0042531,GO:0042532,GO:0060336,GO:0070212,GO:0070403,GO:1902216,GO:0003950,GO:0005737	cytosol|protein ADP-ribosylation|negative regulation of gene expression|enzyme binding|positive regulation of tyrosine phosphorylation of STAT protein|negative regulation of tyrosine phosphorylation of STAT protein|negative regulation of interferon-gamma-mediated signaling pathway|protein poly-ADP-ribosylation|NAD+ binding|positive regulation of interleukin-4-mediated signaling pathway|NAD+ ADP-r…
TCONS_00008895	16.22805372	27.35390791	5.102199522	0.186525433	-2.422555736	0.006560169	0.82103749	Down	7.036036	4.150894	2.740388	1.616908	0.6110691	0	Chr11	70179265	70217670	-	XLOC_003847	XM_008768788.1	0	sense	genic	intronic	overlapping	Muc13	GeneID:207126,Genbank:XM_008768788.1,RGD:708547	mucin 13, cell surface associated	GO:0008150,GO:0016021,GO:0016324,GO:0030277,GO:0042803,GO:0003674,GO:0005615,GO:0005829	biological_process|integral component of membrane|apical plasma membrane|maintenance of gastrointestinal epithelium|protein homodimerization activity|molecular_function|extracellular space|cytosol
TCONS_00009633	45.82715296	3.684580536	87.96972538	23.87509909	4.577434816	0.000194509	0.072016801	Up	0.08191767	0.1177705	0.2265824	3.642076	1.157897	5.473398	Chr12	41167996	41174197	+	XLOC_004146	NM_001009680.1	495	sense	intergenic	downstream	same_strand	Oas1i	GeneID:304507,Genbank:NM_001009680.1,RGD:1359379	2 ' -5 ' oligoadenylate synthetase 1I	GO:0005524,GO:0005634,GO:0005654,GO:0005829,GO:0006955,GO:0016020,GO:0016021,GO:0016779,GO:0045071,GO:0051607,GO:0001730,GO:0060700,GO:0003725	ATP binding|nucleus|nucleoplasm|cytosol|immune response|membrane|integral component of membrane|nucleotidyltransferase activity|negative regulation of viral genome replication|defense response to virus|2'-5'-oligoadenylate synthetase activity|regulation of ribonuclease activity|double-stranded RNA binding
TCONS_00009645	107.2485388	3.514420347	210.9826573	60.03341561	5.907693847	3.42E-13	1.52E-09	Up	0.5778124	0.5790138	0.2829564	21.12825	19.28263	37.88577	Chr12	41206192	41265197	+	XLOC_004145	NM_001009490.1	0	antisense	genic	intronic	containing	Oas1f	GeneID:494199,Genbank:NM_001009490.1,RGD:1359647	2 ' -5 ' oligoadenylate synthetase 1F	GO:0016021,GO:0016740,GO:0016779,GO:0051607,GO:0003725,GO:0005524,GO:0006955	integral component of membrane|transferase activity|nucleotidyltransferase activity|defense response to virus|double-stranded RNA binding|ATP binding|immune response
TCONS_00009679	108.3701615	8.234718966	208.505604	25.32030599	4.662222934	2.51E-05	0.017180479	Up	0.04598648	0.3524487	0.1813081	5.125204	1.847124	7.086778	Chr12	42353738	42408566	+	XLOC_004157	XM_003751197.2	0	sense	genic	exonic	overlapping	Oas1g	GeneID:100910735,Genbank:XM_003751197.2,RGD:6497100	2'-5' oligoadenylate synthetase 1G	GO:0016021,GO:0016779,GO:0051607,GO:0003725,GO:0005524,GO:0006955	integral component of membrane|nucleotidyltransferase activity|defense response to virus|double-stranded RNA binding|ATP binding|immune response
TCONS_00010245	13.25208864	3.901044056	22.60313323	5.794124062	2.534590575	0.010241599	1	Up	0.6782123	0.6427693	0.5843365	2.957839	3.158865	5.003021	Chr12	31736889	31737245	-	XLOC_004374	NM_001271192.1	20162	sense	intergenic	downstream	same_strand	Fzd10	GeneID:363913,Genbank:NM_001271192.1,RGD:1583825	frizzled class receptor 10	GO:0005737,GO:0008150,GO:0009986,GO:0016055,GO:0017147,GO:0032956,GO:0034260,GO:0038031,GO:0042813,GO:0043507,GO:0043547,GO:0003674,GO:0060070,GO:0005575,GO:0005654	cytoplasm|biological_process|cell surface|Wnt signaling pathway|Wnt-protein binding|regulation of actin cytoskeleton organization|negative regulation of GTPase activity|non-canonical Wnt signaling pathway via JNK cascade|Wnt-activated receptor activity|positive regulation of JUN kinase activity|positive regulation of GTPase activity|molecular_function|canonical Wnt signaling pathway|cellular_comp…	rno04310,rno04390,rno04150,rno04550,rno04916,rno05200,rno05205,rno05225,rno05226,rno05217,rno05224,rno04934,rno05166,rno05165	Wnt signaling pathway|Hippo signaling pathway|mTOR signaling pathway|Signaling pathways regulating pluripotency of stem cells|Melanogenesis|Pathways in cancer|Proteoglycans in cancer|Hepatocellular carcinoma|Gastric cancer|Basal cell carcinoma|Breast cancer|Cushing's syndrome|HTLV-I infection|Human papillomavirus infection
TCONS_00010257	72.72565467	134.4882504	10.96305893	0.081516853	-3.616757835	0.027015064	1	Down	0.000439929	21.83196	15.88423	0.04405719	0.1829243	3.023569	Chr12	37181745	37182806	-	XLOC_004382	XM_017598629.1	1033	sense	intergenic	downstream	same_strand	LOC102556092	GeneID:102556092,Genbank:XM_017598629.1,RGD:7677226	uncharacterized LOC102556092, transcript variant X2	GO:0003676,GO:0005634	nucleic acid binding|nucleus
TCONS_00010402	300.1813303	32.63099043	567.7316702	17.39854239	4.12089454	0.000272821	0.096971495	Up	0.5636618	0.4676412	0.4065477	7.489211	3.010084	12.72813	Chr12	41257353	41260080	-	XLOC_004432	NM_144752.2	0	sense	genic	exonic	nested	Oas1b	GeneID:246268,Genbank:NM_144752.2,RGD:708393	2-5 oligoadenylate synthetase 1B	GO:0045071,GO:0003725,GO:0045087,GO:0051607,GO:0005524,GO:0005634,GO:0005654,GO:0005789,GO:0005829,GO:0006955,GO:0060700,GO:0009615,GO:0016020,GO:0016021,GO:0001730,GO:0016779	negative regulation of viral genome replication|double-stranded RNA binding|innate immune response|defense response to virus|ATP binding|nucleus|nucleoplasm|endoplasmic reticulum membrane|cytosol|immune response|regulation of ribonuclease activity|response to virus|membrane|integral component of membrane|2'-5'-oligoadenylate synthetase activity|nucleotidyltransferase activity	rno04621,rno05162,rno05164,rno05160,rno05168	NOD-like receptor signaling pathway|Measles|Influenza A|Hepatitis C|Herpes simplex infection
TCONS_00010481	648.5432198	65.21507431	1231.871365	18.88936535	4.239502326	0.001343605	0.291201813	Up	9.176202	7.528183	14.5414	169.8655	61.88618	340.7882	Chr12	47469638	47497330	-	XLOC_004469	XM_017598539.1	0	sense	genic	intronic	overlapping	LOC691311	GeneID:691311,Genbank:XM_017598539.1,RGD:1585103	hypothetical protein LOC691311, transcript variant X7
TCONS_00010803	4.204367566	0.353447036	8.055288095	22.79065114	4.510370238	0.020785439	1	Up	1.10E-07	6.87E-06	0.02043925	0.04549293	0.1683261	0.4176978	Chr13	69005765	69104571	+	XLOC_004585	NM_022242.2	0	sense	genic	intronic	overlapping	Fam129a	GeneID:63912,Genbank:NM_022242.2,RGD:71088	family with sequence similarity 129, member A	GO:0001934,GO:0003674,GO:0005737,GO:0005829,GO:0005886,GO:0034976,GO:0045727,GO:0001933	positive regulation of protein phosphorylation|molecular_function|cytoplasm|cytosol|plasma membrane|response to endoplasmic reticulum stress|positive regulation of translation|negative regulation of protein phosphorylation
TCONS_00010821	16.84823657	30.46563517	3.230837963	0.1060486	-3.237202517	0.000664071	0.193620297	Down	6.401215	7.264641	1.946826	0	0	1.507488	Chr13	70645614	70647552	+	XLOC_004593	NM_053966.2	9175	antisense	intergenic	downstream	convergent	Lamc1	GeneID:117036,Genbank:NM_053966.2,RGD:621052	laminin subunit gamma 1	GO:0043208,GO:0005604,GO:0043259,GO:0005605,GO:0065003,GO:0005606,GO:0005615,GO:0007155,GO:0016477,GO:0022617,GO:0031012,GO:0031175,GO:0005201,GO:0031581,GO:0005578,GO:0034446	glycosphingolipid binding|basement membrane|laminin-10 complex|basal lamina|protein-containing complex assembly|laminin-1 complex|extracellular space|cell adhesion|cell migration|extracellular matrix disassembly|extracellular matrix|neuron projection development|extracellular matrix structural constituent|hemidesmosome assembly|proteinaceous extracellular matrix|substrate adhesion-dependent cell …	rno04151,rno04512,rno04510,rno05200,rno05222,rno05020,rno05165,rno05146,rno05145	PI3K-Akt signaling pathway|ECM-receptor interaction|Focal adhesion|Pathways in cancer|Small cell lung cancer|Prion diseases|Human papillomavirus infection|Amoebiasis|Toxoplasmosis
TCONS_00011201	317.1728422	197.7612453	436.5844392	2.20763395	1.142500978	0.04087545	1	Up	1.030262	0.592945	0.5170218	0.8844486	1.822026	1.774744	Chr13	42902674	42913968	-	XLOC_004791	XM_017599040.1	0	sense	genic	intronic	nested	Nckap5	GeneID:363974,Genbank:XM_017599040.1,RGD:1564507	NCK-associated protein 5, transcript variant X6	GO:0003674,GO:0005575,GO:0008150	molecular_function|cellular_component|biological_process
TCONS_00011813	61.42859954	0	122.8571991	Inf	Inf	0.040469917	1	Up	2.19E-06	2.67E-12	7.99E-18	0.3624023	8.23E-09	9.04345	Chr14	5872276	5947034	+	XLOC_005046	XM_006250609.3	0	sense	genic	exonic	overlapping	Mpa2l	GeneID:305139,Genbank:XM_006250609.3,RGD:1561523	macrophage activation 2 like, transcript variant X2	GO:0003924,GO:0005525	GTPase activity|GTP binding
TCONS_00011814	290.7834919	123.1539012	458.4130826	3.722278206	1.896185888	0.015282255	1	Up	0.7015111	0.63032	0.7464657	2.549493	1.010629	3.770014	Chr14	5872276	5953485	+	XLOC_005046	XM_006250609.3	0	sense	genic	exonic	containing	Mpa2l	GeneID:305139,Genbank:XM_006250609.3,RGD:1561523	macrophage activation 2 like, transcript variant X2	GO:0003924,GO:0005525	GTPase activity|GTP binding
TCONS_00011821	109.3714478	64.55007907	154.1928164	2.388731643	1.256244786	0.042025351	1	Up	3.260082	1.825853	1.285296	5.163551	2.696511	5.907825	Chr14	5954549	5986254	+	XLOC_005044	NM_001128311.1	0	sense	genic	intronic	overlapping	Abcg3	GeneID:498327,Genbank:NM_001128311.1,RGD:1565568	ATP-binding cassette, subfamily G (WHITE), member 3
TCONS_00012104	354.1416056	74.06795532	634.215256	8.562613254	3.098051165	0.035624658	1	Up	7.109434	12.10276	3.04682	56.12389	116.1279	6.656707	Chr14	46526161	46527403	+	XLOC_005158	XM_017599469.1	37506	antisense	intergenic	downstream	convergent	LOC108352751	GeneID:108352751,Genbank:XM_017599469.1	S-antigen protein-like
TCONS_00012137	18676.07576	11457.25727	25894.89424	2.260130293	1.176405944	0.033017489	1	Up	676.7164	615.7737	344.1906	1423.992	1292.743	679.2317	Chr14	46646280	46687939	+	XLOC_005158	XM_017599544.1	0	antisense	genic	intronic	containing	LOC108352829	GeneID:108352829,Genbank:XM_017599544.1	serine/arginine repetitive matrix protein 1-like
TCONS_00012307	116.6047218	32.88698076	200.3224628	6.091239093	2.606735734	5.46E-05	0.031464297	Up	7.30942	0.08991367	1.34E-05	11.56196	13.79947	12.67941	Chr14	84213389	84292381	+	XLOC_005239	XM_008770339.2	0	sense	genic	intronic	containing	Sec14l4	GeneID:498399,Genbank:XM_008770339.2,RGD:1565810	SEC14-like lipid binding 4, transcript variant X1
TCONS_00013688	9.020032441	0	18.04006488	Inf	Inf	0.000141859	0.057298253	Up	9.66E-06	3.55E-06	4.85E-08	0.8427246	0.5555564	0.2246332	Chr15	47285070	47300407	+	XLOC_005811	NM_001106045.1	0	sense	genic	exonic	overlapping	Sox7	GeneID:290317,Genbank:NM_001106045.1,RGD:1310038	SRY box 7	GO:0003705,GO:0005575,GO:0005634,GO:0005737,GO:0006357,GO:0008150,GO:0008285,GO:0043280,GO:0043565,GO:0044212,GO:0045892,GO:0001706,GO:0045893,GO:0003674,GO:0060828,GO:0003700	transcription factor activity, RNA polymerase II distal enhancer sequence-specific binding|cellular_component|nucleus|cytoplasm|regulation of transcription by RNA polymerase II|biological_process|negative regulation of cell proliferation|positive regulation of cysteine-type endopeptidase activity involved in apoptotic process|sequence-specific DNA binding|transcription regulatory region DNA bindi…
TCONS_00014245	49.79691291	18.74480333	80.84902248	4.313143277	2.108739641	0.002097828	0.390364904	Up	0.2111276	0.4340828	0.172002	1.072854	0.7086276	1.507753	Chr15	39635096	39689350	-	XLOC_006045	XM_017599895.1	0	sense	genic	exonic	overlapping	Phf11	GeneID:361051,Genbank:XM_017599895.1,RGD:1310853	PHD finger protein 11, transcript variant X1	GO:0006355,GO:0031965,GO:0046872,GO:0005634,GO:0005654,GO:0006351	regulation of transcription, DNA-templated|nuclear membrane|metal ion binding|nucleus|nucleoplasm|transcription, DNA-templated
TCONS_00014246	18.71941643	4.439101205	32.99973165	7.433876841	2.894114787	0.005477133	0.725929256	Up	0.04565249	0.000120359	0.1245378	0.1096646	0.6272101	0.6037274	Chr15	39635096	39710520	-	XLOC_006045	XM_017599891.1	0	sense	genic	exonic	nested	Setdb2	GeneID:100361710,Genbank:XM_017599891.1,RGD:2319564	SET domain, bifurcated 2, transcript variant X8	GO:0005654,GO:0005694,GO:0005829,GO:0007059,GO:0008270,GO:0046872,GO:0046974,GO:0051567,GO:0000278,GO:0003677,GO:0005634	nucleoplasm|chromosome|cytosol|chromosome segregation|zinc ion binding|metal ion binding|histone methyltransferase activity (H3-K9 specific)|histone H3-K9 methylation|mitotic cell cycle|DNA binding|nucleus	rno00310	Lysine degradation
TCONS_00014936	71.74214049	8.28824184	135.1960391	16.31178744	4.027842976	0.000153111	0.059154155	Up	0.850797	0.3389322	1.242371	9.553936	7.24679	21.70371	Chr16	31265560	31278647	+	XLOC_006311	XM_017600408.1	0	antisense	genic	intronic	nested	LOC100911190	GeneID:100911190,Genbank:XM_017600408.1,RGD:6494112	probable ATP-dependent RNA helicase DDX60-like
TCONS_00014938	96.44543134	7.142820638	185.748042	26.00485879	4.700709299	2.24E-05	0.016601827	Up	0.2127655	0.1258823	0.1735668	4.318348	1.79475	6.719284	Chr16	31314094	31342123	+	XLOC_006312	XM_017600408.1	0	antisense	genic	exonic	overlapping	LOC100911190	GeneID:100911190,Genbank:XM_017600408.1,RGD:6494112	probable ATP-dependent RNA helicase DDX60-like
TCONS_00015453	504.1552215	46.60993354	961.7005095	20.63295174	4.366878322	0.005555164	0.725929256	Up	1.349414	4.278987	1.946666	41.30318	11.70664	95.59865	Chr16	29804746	29968549	-	XLOC_006556	XM_008771202.2	0	sense	genic	exonic	overlapping	LOC100912658	GeneID:100912658,Genbank:XM_008771202.2,RGD:6485857	probable ATP-dependent RNA helicase DDX60-like, transcript variant X1
TCONS_00015470	2481.41428	1440.97308	3521.85548	2.444081384	1.289292326	0.018374654	1	Up	15.37946	13.53698	9.091474	23.5051	22.5841	41.12451	Chr16	29915096	29919687	-	XLOC_006556	XM_017600406.1	0	sense	genic	exonic	nested	Ddx60	GeneID:100360801,Genbank:XM_017600406.1,RGD:1560014	DEXD/H-box helicase 60, transcript variant X1
TCONS_00015478	211.8230995	18.72739985	404.9187991	21.62173085	4.434410112	0.002228819	0.404189439	Up	0.5457324	1.055386	0.8716795	13.44144	6.006856	32.57982	Chr16	31229206	31231979	-	XLOC_006558	XM_017600408.1	0	sense	genic	intronic	nested	LOC100911190	GeneID:100911190,Genbank:XM_017600408.1,RGD:6494112	probable ATP-dependent RNA helicase DDX60-like
TCONS_00015501	578.2530953	55.5951817	1100.911009	19.80227378	4.307594191	1.96E-05	0.015821663	Up	0.912355	1.211098	1.359864	21.05414	10.38323	34.95644	Chr16	31312254	31314123	-	XLOC_006558	XM_017600408.1	0	sense	genic	exonic	nested	LOC100911190	GeneID:100911190,Genbank:XM_017600408.1,RGD:6494112	probable ATP-dependent RNA helicase DDX60-like
TCONS_00015503	31.47198637	3.387609932	59.55636282	17.58064358	4.13591598	0.001306516	0.290242497	Up	0.1666157	0.01846585	0.01805855	0.789607	0.4331812	1.747157	Chr16	31407419	31412162	-	XLOC_006559	XM_003751585.4	17079	antisense	intergenic	downstream	convergent	Palld	GeneID:364558,Genbank:XM_003751585.4,RGD:1359390	palladin, cytoskeletal associated protein, transcript variant X4
TCONS_00015640	22.76271163	45.52542327	0	0	#NAME?	0.00056183	0.178300744	Down	4.296559	3.133544	9.71E-10	7.28E-09	1.29E-10	4.61E-09	Chr16	69179019	69232572	-	XLOC_006629	XM_008771324.2	0	sense	genic	exonic	overlapping	Erlin2	GeneID:290823,Genbank:XM_008771324.2,RGD:1309010	ER lipid raft associated 2, transcript variant X2	GO:0045717,GO:0005829,GO:0005886,GO:0008203,GO:0015485,GO:0016021,GO:0030433,GO:0031625,GO:0032933,GO:0005783,GO:0045121,GO:0005789,GO:0045541	negative regulation of fatty acid biosynthetic process|cytosol|plasma membrane|cholesterol metabolic process|cholesterol binding|integral component of membrane|ubiquitin-dependent ERAD pathway|ubiquitin protein ligase binding|SREBP signaling pathway|endoplasmic reticulum|membrane raft|endoplasmic reticulum membrane|negative regulation of cholesterol biosynthetic process
TCONS_00015641	168.2877686	75.01379759	261.5617396	3.486848393	1.801923638	0.004281866	0.639846997	Up	1.855181	0.07086799	12.81709	18.7832	13.90656	20.82274	Chr16	69179028	69272928	-	XLOC_006629	XM_008771323.2	0	sense	genic	exonic	overlapping	Erlin2	GeneID:290823,Genbank:XM_008771323.2,RGD:1309010	ER lipid raft associated 2, transcript variant X1	GO:0045717,GO:0005829,GO:0005886,GO:0008203,GO:0015485,GO:0016021,GO:0030433,GO:0031625,GO:0032933,GO:0005783,GO:0045121,GO:0005789,GO:0045541	negative regulation of fatty acid biosynthetic process|cytosol|plasma membrane|cholesterol metabolic process|cholesterol binding|integral component of membrane|ubiquitin-dependent ERAD pathway|ubiquitin protein ligase binding|SREBP signaling pathway|endoplasmic reticulum|membrane raft|endoplasmic reticulum membrane|negative regulation of cholesterol biosynthetic process
TCONS_00016132	227.5212192	0	455.0424385	Inf	Inf	5.47E-11	1.62E-07	Up	0	0	0	8.394902	29.49161	13.21592	Chr17	37612912	37622671	+	XLOC_006821	NM_001271205.1	0	sense	genic	exonic	containing	Sox4	GeneID:364712,Genbank:NM_001271205.1,RGD:1309488	SRY box 4	GO:0003183,GO:0003211,GO:0003215,GO:0003289,GO:0003357,GO:0003700,GO:0005634,GO:0030217,GO:0005654,GO:0031018,GO:0005737,GO:0031397,GO:0005739,GO:0031647,GO:0032024,GO:0035019,GO:0035910,GO:0060412,GO:0042593,GO:0060548,GO:0042769,GO:0060563,GO:0043065,GO:0060993,GO:0071333,GO:0090263,GO:2000761,GO:0000976,GO:0000981,GO:0001046,GO:0001077,GO:0001105,GO:0001501,GO:0001666,GO:0001841,GO:0002328,GO:…	mitral valve morphogenesis|cardiac ventricle formation|cardiac right ventricle morphogenesis|atrial septum primum morphogenesis|noradrenergic neuron differentiation|DNA binding transcription factor activity|nucleus|T cell differentiation|nucleoplasm|endocrine pancreas development|cytoplasm|negative regulation of protein ubiquitination|mitochondrion|regulation of protein stability|positive regulat…
TCONS_00016893	22.11721203	44.23442407	0	0	#NAME?	0.004729642	0.663779009	Down	0.006869465	1.045227	2.153312	0.001157981	2.45E-08	0.000228842	Chr17	57976317	58055615	-	XLOC_007153	NM_053539.2	0	sense	genic	exonic	overlapping	Idi1	GeneID:89784,Genbank:NM_053539.2,RGD:621835	isopentenyl-diphosphate delta isomerase 1	GO:0050992,GO:0004452,GO:0005737,GO:0005777,GO:0006695,GO:0008299,GO:0009240,GO:0016787,GO:0000287,GO:0030145,GO:0035634	dimethylallyl diphosphate biosynthetic process|isopentenyl-diphosphate delta-isomerase activity|cytoplasm|peroxisome|cholesterol biosynthetic process|isoprenoid biosynthetic process|isopentenyl diphosphate biosynthetic process|hydrolase activity|magnesium ion binding|manganese ion binding|response to stilbenoid	rno00900	Terpenoid backbone biosynthesis
TCONS_00016901	30.76216052	16.68294789	44.84137315	2.687856693	1.426456221	0.043623877	1	Up	0.04888815	0.217496	0.2221743	0.2490879	0.430298	0.6527288	Chr17	60881242	60886837	-	XLOC_007158	NM_001270417.1	769	sense	intergenic	downstream	same_strand	Wac	GeneID:307029,Genbank:NM_001270417.1,RGD:1562407	WW domain containing adaptor with coiled-coil	GO:0005681,GO:0006974,GO:0010390,GO:0016239,GO:0032435,GO:0044783,GO:0045893,GO:0071894,GO:0000993,GO:0003682,GO:0005654	spliceosomal complex|cellular response to DNA damage stimulus|histone monoubiquitination|positive regulation of macroautophagy|negative regulation of proteasomal ubiquitin-dependent protein catabolic process|G1 DNA damage checkpoint|positive regulation of transcription, DNA-templated|histone H2B conserved C-terminal lysine ubiquitination|RNA polymerase II core binding|chromatin binding|nucleoplasm
TCONS_00017459	190.7663722	26.69404806	354.8386964	13.29280203	3.732573342	4.72E-06	0.006987118	Up	0.923089	1.220882	0.9362054	11.65096	7.624067	19.77283	Chr18	55385658	55459236	+	XLOC_007386	XM_003751792.4	0	sense	genic	intronic	containing	LOC100910934	GeneID:100910934,Genbank:XM_003751792.4,RGD:6495949	interferon-inducible GTPase 1-like
TCONS_00017460	104.6514482	25.57163043	183.7312659	7.184964853	2.844981099	0.012849801	1	Up	0.7035144	1.244269	0.6143594	4.125122	2.729333	10.82526	Chr18	55386689	55580737	+	XLOC_007387	XM_006254759.3	0	sense	genic	intronic	containing	RGD1309362	GeneID:307415,Genbank:XM_006254759.3,RGD:1309362	similar to interferon-inducible GTPase, transcript variant X1	GO:0006952,GO:0035458,GO:0003924,GO:0005525,GO:0005789	defense response|cellular response to interferon-beta|GTPase activity|GTP binding|endoplasmic reticulum membrane
TCONS_00017461	78.82337882	5.252755679	152.394002	29.0122007	4.858587829	2.36E-10	5.25E-07	Up	0.08017925	0.2907538	0.1627441	5.102076	3.098314	6.740869	Chr18	55386711	55460733	+	XLOC_007387	XM_006254758.3	0	sense	genic	intronic	overlapping	LOC100910979	GeneID:100910979,Genbank:XM_006254758.3,RGD:6495625	interferon-inducible GTPase 1-like, transcript variant X1	GO:0006952,GO:0016020,GO:0035458,GO:0003924,GO:0005525,GO:0005789	defense response|membrane|cellular response to interferon-beta|GTPase activity|GTP binding|endoplasmic reticulum membrane
TCONS_00017475	88.18892992	14.50180861	161.8760512	11.16247329	3.480584818	1.72E-05	0.015298321	Up	1.106596	1.615582	1.791671	16.91537	8.506941	23.47631	Chr18	55469384	55534089	+	XLOC_007389	NM_001024884.1	0	sense	genic	intronic	containing	RGD1309362	GeneID:307415,Genbank:NM_001024884.1,RGD:1309362	similar to interferon-inducible GTPase	GO:0006952,GO:0035458,GO:0003924,GO:0005525,GO:0005789	defense response|cellular response to interferon-beta|GTPase activity|GTP binding|endoplasmic reticulum membrane
TCONS_00018760	106.7924407	21.95959571	191.6252857	8.726266562	3.125364544	0.009735996	1	Up	0.5791206	0.3152574	0.2411351	2.703134	0.9807518	5.394655	Chr19	10926611	10939225	-	XLOC_007968	XM_008772331.2	0	sense	genic	intronic	nested	Nlrc5	GeneID:291861,Genbank:XM_008772331.2,RGD:1309166	NLR family, CARD domain containing 5, transcript variant X1	GO:0005737,GO:0005813,GO:0005829,GO:0032088,GO:0043549,GO:0045087,GO:0045345,GO:0045944,GO:0051607,GO:0060335,GO:0000979,GO:0060339,GO:0005524,GO:0060340,GO:0005634	cytoplasm|centrosome|cytosol|negative regulation of NF-kappaB transcription factor activity|regulation of kinase activity|innate immune response|positive regulation of MHC class I biosynthetic process|positive regulation of transcription by RNA polymerase II|defense response to virus|positive regulation of interferon-gamma-mediated signaling pathway|RNA polymerase II core promoter sequence-specif…
TCONS_00019110	36.10862656	14.94063193	57.27662119	3.833614366	1.93870522	0.00742527	0.894396534	Up	1.544265	0.7986344	1.229594	4.678049	2.921663	5.25622	Chr19	43533907	43535602	-	XLOC_008106	XM_008772571.2	0	sense	genic	intronic	overlapping	Mlkl	GeneID:690743,Genbank:XM_008772571.2,RGD:1592221	mixed lineage kinase domain-like, transcript variant X2	GO:0005737,GO:0005886,GO:0006468,GO:0007166,GO:0019901,GO:0042802,GO:0044877,GO:0070207,GO:0070266,GO:0004672,GO:0004871,GO:0005524	cytoplasm|plasma membrane|protein phosphorylation|cell surface receptor signaling pathway|protein kinase binding|identical protein binding|protein-containing complex binding|protein homotrimerization|necroptotic process|protein kinase activity|signal transducer activity|ATP binding	rno04668,rno04217	TNF signaling pathway|Necroptosis
TCONS_00019669	47.9607633	23.73995755	72.18156906	3.04050961	1.604313149	0.034568199	1	Up	0.457655	0.2782672	0.1462599	0.2788089	1.263267	0.9782827	Chr2	98272360	98276109	+	XLOC_008375	XM_008760865.2	3175	sense	intergenic	downstream	same_strand	Pex2	GeneID:29534,Genbank:XM_008760865.2,RGD:61814	peroxisomal biogenesis factor 2, transcript variant X4	GO:0031648,GO:0003674,GO:0042632,GO:0005777,GO:0045540,GO:0005778,GO:0005779,GO:0006635,GO:0006699,GO:0007031,GO:0046872,GO:0007399,GO:0048147,GO:0008150,GO:0050680,GO:0016020,GO:0061630,GO:0016558,GO:0000038,GO:0016567,GO:0000122,GO:0016593,GO:0001764	protein destabilization|molecular_function|cholesterol homeostasis|peroxisome|regulation of cholesterol biosynthetic process|peroxisomal membrane|integral component of peroxisomal membrane|fatty acid beta-oxidation|bile acid biosynthetic process|peroxisome organization|metal ion binding|nervous system development|negative regulation of fibroblast proliferation|biological_process|negative regulati…	rno04146	Peroxisome
TCONS_00020289	825.428233	532.0530571	1118.803409	2.102804211	1.072314529	0.047247016	1	Up	32.59392	39.45397	45.60336	84.15734	53.85723	99.03519	Chr2	199114614	199184941	+	XLOC_008625	NM_019280.1	0	sense	genic	exonic	overlapping	Gja5	GeneID:50563,Genbank:NM_019280.1,RGD:2692	gap junction protein, alpha 5	GO:0003174,GO:0003193,GO:0003281,GO:0003283,GO:0003284,GO:0003294,GO:0005243,GO:0035050,GO:0005887,GO:0035922,GO:0005921,GO:0042995,GO:0005922,GO:0045776,GO:0045907,GO:0048844,GO:0051259,GO:0086053,GO:0055077,GO:0086054,GO:0055085,GO:0086064,GO:0055117,GO:0086065,GO:0086067,GO:0086075,GO:0086076,GO:0001501,GO:0086077,GO:0001525,GO:0086078,GO:0001568,GO:0086091,GO:0003071,GO:0003073,GO:0003105,GO:…	mitral valve development|pulmonary valve formation|ventricular septum development|atrial septum development|septum primum development|atrial ventricular junction remodeling|gap junction channel activity|embryonic heart tube development|integral component of plasma membrane|foramen ovale closure|gap junction|cell projection|connexin complex|negative regulation of blood pressure|positive regulation…
TCONS_00020546	83.61481446	0.706894072	166.5227348	235.5695731	7.880009398	0.012822835	1	Up	1.07E-22	1.28E-27	0.04829392	2.560688	0.1409918	12.50985	Chr2	248322593	248423081	+	XLOC_008758	XM_006233425.3	0	sense	genic	exonic	overlapping	Gbp1	GeneID:304266,Genbank:XM_006233425.3,RGD:1311877	guanylate binding protein 1, transcript variant X1	GO:1903076,GO:0050830,GO:0005829,GO:1903077,GO:0050848,GO:0019002,GO:0050860,GO:0019003,GO:0019899,GO:0019955,GO:0020005,GO:0030507,GO:0051260,GO:0031410,GO:0051879,GO:0035458,GO:0070373,GO:0042802,GO:0071346,GO:0042803,GO:0003779,GO:1900025,GO:0042832,GO:0003924,GO:1900041,GO:0044406,GO:0005525	regulation of protein localization to plasma membrane|defense response to Gram-positive bacterium|cytosol|negative regulation of protein localization to plasma membrane|regulation of calcium-mediated signaling|GMP binding|negative regulation of T cell receptor signaling pathway|GDP binding|enzyme binding|cytokine binding|symbiont-containing vacuole membrane|spectrin binding|protein homooligomeriz…	rno04621	NOD-like receptor signaling pathway
TCONS_00020554	25.08806049	0	50.17612097	Inf	Inf	0.003557226	0.56445558	Up	0	0	0	2.54901	0.1257295	7.461351	Chr2	248344907	248386636	+	XLOC_008759	XM_017591353.1	0	sense	genic	intronic	nested	Gbp1	GeneID:304266,Genbank:XM_017591353.1,RGD:1311877	guanylate binding protein 1, transcript variant X3	GO:1903076,GO:0050830,GO:0005829,GO:1903077,GO:0050848,GO:0019002,GO:0050860,GO:0019003,GO:0019899,GO:0019955,GO:0020005,GO:0030507,GO:0051260,GO:0031410,GO:0051879,GO:0035458,GO:0070373,GO:0042802,GO:0071346,GO:0042803,GO:0003779,GO:1900025,GO:0042832,GO:0003924,GO:1900041,GO:0044406,GO:0005525	regulation of protein localization to plasma membrane|defense response to Gram-positive bacterium|cytosol|negative regulation of protein localization to plasma membrane|regulation of calcium-mediated signaling|GMP binding|negative regulation of T cell receptor signaling pathway|GDP binding|enzyme binding|cytokine binding|symbiont-containing vacuole membrane|spectrin binding|protein homooligomeriz…	rno04621	NOD-like receptor signaling pathway
TCONS_00021862	86.78394312	35.41152165	138.1563646	3.901452356	1.964011282	0.001702162	0.336120232	Up	2.744837	4.26E-05	2.074489	5.432837	4.6886	7.603699	Chr2	225335739	225396976	-	XLOC_009321	NM_012804.1	0	sense	genic	exonic	overlapping	Abcd3	GeneID:25270,Genbank:NM_012804.1,RGD:2007	ATP binding cassette subfamily D member 3	GO:0055085,GO:0015910,GO:0005524,GO:0016021,GO:0005739,GO:0016887,GO:0005777,GO:0005778,GO:0042493,GO:0005782,GO:0042626,GO:0006633,GO:0042760,GO:0042803,GO:0006635,GO:0005324,GO:0043231,GO:0007031,GO:0005515,GO:0043621,GO:0014070	transmembrane transport|peroxisomal long-chain fatty acid import|ATP binding|integral component of membrane|mitochondrion|ATPase activity|peroxisome|peroxisomal membrane|response to drug|peroxisomal matrix|ATPase activity, coupled to transmembrane movement of substances|fatty acid biosynthetic process|very long-chain fatty acid catabolic process|protein homodimerization activity|fatty acid beta-o…	rno02010,rno04146	ABC transporters|Peroxisome
TCONS_00021863	49.36604826	18.78711519	79.94498133	4.255309052	2.089263915	0.009548153	1	Up	1.520886	5.04E-05	1.036139	2.147387	2.607267	5.673693	Chr2	225335744	225363735	-	XLOC_009321	NM_012804.1	0	sense	genic	exonic	nested	Abcd3	GeneID:25270,Genbank:NM_012804.1,RGD:2007	ATP binding cassette subfamily D member 3	GO:0055085,GO:0015910,GO:0005524,GO:0016021,GO:0005739,GO:0016887,GO:0005777,GO:0005778,GO:0042493,GO:0005782,GO:0042626,GO:0006633,GO:0042760,GO:0042803,GO:0006635,GO:0005324,GO:0043231,GO:0007031,GO:0005515,GO:0043621,GO:0014070	transmembrane transport|peroxisomal long-chain fatty acid import|ATP binding|integral component of membrane|mitochondrion|ATPase activity|peroxisome|peroxisomal membrane|response to drug|peroxisomal matrix|ATPase activity, coupled to transmembrane movement of substances|fatty acid biosynthetic process|very long-chain fatty acid catabolic process|protein homodimerization activity|fatty acid beta-o…	rno02010,rno04146	ABC transporters|Peroxisome
TCONS_00022010	541.2893576	348.100155	734.4785602	2.109963324	1.077217922	0.048295518	1	Up	45.99808	28.83025	52.87361	91.30723	62.39577	103.358	Chr2	251529436	251582537	-	XLOC_009383	NM_031327.2	0	sense	genic	exonic	overlapping	Cyr61	GeneID:83476,Genbank:NM_031327.2,RGD:620763	cysteine-rich, angiogenic inducer, 61	GO:0003278,GO:0003281,GO:0005178,GO:0005520,GO:0010518,GO:0005578,GO:0010811,GO:0005615,GO:0030198,GO:0030335,GO:0045669,GO:0030513,GO:0045766,GO:0045860,GO:0045944,GO:0001558,GO:0070372,GO:0050840,GO:0001649,GO:0072593,GO:0060413,GO:0001934,GO:0002041,GO:0098609,GO:2000304,GO:0003181,GO:0006935,GO:0007155,GO:0007165,GO:0007267,GO:0033690,GO:0008201,GO:0043065,GO:0043066,GO:0043280,GO:0044319,GO:…	apoptotic process involved in heart morphogenesis|ventricular septum development|integrin binding|insulin-like growth factor binding|positive regulation of phospholipase activity|proteinaceous extracellular matrix|positive regulation of cell-substrate adhesion|extracellular space|extracellular matrix organization|positive regulation of cell migration|positive regulation of osteoblast differentiat…
TCONS_00022094	11.12649848	0	22.25299695	Inf	Inf	0.013768467	1	Up	3.25E-20	2.68E-20	9.62E-19	7.449064	0.000791854	3.269439	Chr20	2038668	2059714	+	XLOC_009415	NM_001008852.1	0	sense	genic	exonic	overlapping	RT1-M6-1	GeneID:414785,Genbank:NM_001008852.1,RGD:1598232	RT1 class I, locus M6, gene 1	GO:0016021,GO:0042605,GO:0002474,GO:0005102,GO:0005886	integral component of membrane|peptide antigen binding|antigen processing and presentation of peptide antigen via MHC class I|signaling receptor binding|plasma membrane	rno04514,rno04144,rno04145,rno04218,rno04650,rno04612,rno05203,rno05320,rno05330,rno05332,rno05416,rno04940,rno05166,rno05168,rno05167,rno05169,rno05165	Cell adhesion molecules (CAMs)|Endocytosis|Phagosome|Cellular senescence|Natural killer cell mediated cytotoxicity|Antigen processing and presentation|Viral carcinogenesis|Autoimmune thyroid disease|Allograft rejection|Graft-versus-host disease|Viral myocarditis|Type I diabetes mellitus|HTLV-I infection|Herpes simplex infection|Kaposi's sarcoma-associated herpesvirus infection|Epstein-Barr virus …
TCONS_00022102	199.0560982	20.28805926	377.8241371	18.62298075	4.219012101	1.51E-05	0.014867004	Up	1.05E-05	6.575481	1.734182	30.07609	38.98686	82.67198	Chr20	2593811	2637759	+	XLOC_009419	NM_031504.3	13840	antisense	intergenic	downstream	convergent	C4a	GeneID:24233,Genbank:NM_031504.3,RGD:620005	complement component 4A (Rodgers blood group)	GO:0005576,GO:0005615,GO:0006954,GO:0006956,GO:0006958,GO:0010951,GO:0030054,GO:0030424,GO:0030425,GO:0003674,GO:0045087,GO:0004866,GO:0045202	extracellular region|extracellular space|inflammatory response|complement activation|complement activation, classical pathway|negative regulation of endopeptidase activity|cell junction|axon|dendrite|molecular_function|innate immune response|endopeptidase inhibitor activity|synapse	rno04610,rno05322,rno05133,rno05150	Complement and coagulation cascades|Systemic lupus erythematosus|Pertussis|Staphylococcus aureus infection
TCONS_00022311	905.306678	460.3317881	1350.281568	2.933279002	1.552514301	0.027981502	1	Up	53.77567	21.9693	23.10006	91.83199	41.02464	130.9893	Chr20	5335979	5419278	+	XLOC_009475	NM_001008829.1	0	sense	genic	intronic	containing	RT1-A2	GeneID:24974,Genbank:NM_001008829.1,RGD:1595923	RT1 class Ia, locus A2	GO:0005102,GO:0005515,GO:0005886,GO:0006955,GO:0009897,GO:0010977,GO:0016021,GO:0042605,GO:0042612,GO:0045121,GO:0001916,GO:0002474,GO:0002485	signaling receptor binding|protein binding|plasma membrane|immune response|external side of plasma membrane|negative regulation of neuron projection development|integral component of membrane|peptide antigen binding|MHC class I protein complex|membrane raft|positive regulation of T cell mediated cytotoxicity|antigen processing and presentation of peptide antigen via MHC class I|antigen processing…	rno04514,rno04144,rno04145,rno04218,rno04650,rno04612,rno05203,rno05320,rno05330,rno05332,rno05416,rno04940,rno05166,rno05168,rno05167,rno05169,rno05165	Cell adhesion molecules (CAMs)|Endocytosis|Phagosome|Cellular senescence|Natural killer cell mediated cytotoxicity|Antigen processing and presentation|Viral carcinogenesis|Autoimmune thyroid disease|Allograft rejection|Graft-versus-host disease|Viral myocarditis|Type I diabetes mellitus|HTLV-I infection|Herpes simplex infection|Kaposi's sarcoma-associated herpesvirus infection|Epstein-Barr virus …
TCONS_00022340	163.3389514	11.94289545	314.7350074	26.35332518	4.719913103	0.002383769	0.415336683	Up	0.8878522	0.4671487	0.1988302	20.59068	10.34672	4.488587	Chr20	5355055	5383188	+	XLOC_009475	XM_017601545.1	0	sense	genic	intronic	containing	RT1-A2	GeneID:24974,Genbank:XM_017601545.1,RGD:1595923	RT1 class Ia, locus A2, transcript variant X1	GO:0005102,GO:0005515,GO:0005886,GO:0006955,GO:0009897,GO:0010977,GO:0016021,GO:0042605,GO:0042612,GO:0045121,GO:0001916,GO:0002474,GO:0002485	signaling receptor binding|protein binding|plasma membrane|immune response|external side of plasma membrane|negative regulation of neuron projection development|integral component of membrane|peptide antigen binding|MHC class I protein complex|membrane raft|positive regulation of T cell mediated cytotoxicity|antigen processing and presentation of peptide antigen via MHC class I|antigen processing…	rno04514,rno04144,rno04145,rno04218,rno04650,rno04612,rno05203,rno05320,rno05330,rno05332,rno05416,rno04940,rno05166,rno05168,rno05167,rno05169,rno05165	Cell adhesion molecules (CAMs)|Endocytosis|Phagosome|Cellular senescence|Natural killer cell mediated cytotoxicity|Antigen processing and presentation|Viral carcinogenesis|Autoimmune thyroid disease|Allograft rejection|Graft-versus-host disease|Viral myocarditis|Type I diabetes mellitus|HTLV-I infection|Herpes simplex infection|Kaposi's sarcoma-associated herpesvirus infection|Epstein-Barr virus …
TCONS_00022909	35.46053325	18.13316246	52.78790404	2.911125082	1.541576829	0.031563417	1	Up	0.2901585	0.4320469	0.2511417	0.8738903	0.6252137	1.133526	Chr20	1747603	1813221	-	XLOC_009694	NM_001001422.1	0	antisense	genic	intronic	containing	Olr1737	GeneID:405349,Genbank:NM_001001422.1,RGD:1333060	olfactory receptor 1737	GO:0005886,GO:0007186,GO:0016021,GO:0050907,GO:0050911,GO:0004888,GO:0004930,GO:0004984	plasma membrane|G-protein coupled receptor signaling pathway|integral component of membrane|detection of chemical stimulus involved in sensory perception|detection of chemical stimulus involved in sensory perception of smell|transmembrane signaling receptor activity|G-protein coupled receptor activity|olfactory receptor activity	rno04740	Olfactory transduction
TCONS_00022979	618.999993	393.4651673	844.5348186	2.146403008	1.101920981	0.047490775	1	Up	36.73312	23.03012	28.89211	68.79171	34.58704	73.83584	Chr20	3726137	3791754	-	XLOC_009731	XM_008772769.2	0	sense	genic	exonic	overlapping	LOC103690108	GeneID:103690108,Genbank:XM_008772769.2,RGD:9113230	class I histocompatibility antigen, Non-RT1.A alpha-1 chain-like
TCONS_00022986	481.8235349	290.8081129	672.8389568	2.313687022	1.210193721	0.046922044	1	Up	56.4799	27.63194	38.03218	85.7408	45.567	132.184	Chr20	3792660	3795219	-	XLOC_009733	XM_008772769.2	0	sense	genic	intronic	nested	LOC103690108	GeneID:103690108,Genbank:XM_008772769.2,RGD:9113230	class I histocompatibility antigen, Non-RT1.A alpha-1 chain-like
TCONS_00023042	425.3862635	30.93040478	819.8421223	26.50602629	4.728248496	0.000504569	0.166059273	Up	6.921055	3.553787	2.960139	124.8393	178.6633	23.7673	Chr20	4638503	4772009	-	XLOC_009747	NM_001008840.1	0	sense	genic	exonic	overlapping	RT1-CE2	GeneID:414779,Genbank:NM_001008840.1,RGD:1598235	RT1 class I, locus CE2			rno04514,rno04144,rno04145,rno04218,rno04650,rno04612,rno05203,rno05320,rno05330,rno05332,rno05416,rno04940,rno05166,rno05168,rno05167,rno05169,rno05165	Cell adhesion molecules (CAMs)|Endocytosis|Phagosome|Cellular senescence|Natural killer cell mediated cytotoxicity|Antigen processing and presentation|Viral carcinogenesis|Autoimmune thyroid disease|Allograft rejection|Graft-versus-host disease|Viral myocarditis|Type I diabetes mellitus|HTLV-I infection|Herpes simplex infection|Kaposi's sarcoma-associated herpesvirus infection|Epstein-Barr virus …
TCONS_00023051	262.7546691	140.2551769	385.2541614	2.746808852	1.457756518	0.018806373	1	Up	24.77807	13.66378	20.28812	49.34418	26.8424	75.80966	Chr20	4638504	4675031	-	XLOC_009747	NM_001008845.1	20734	sense	intergenic	downstream	same_strand	RT1-CE7	GeneID:368153,Genbank:NM_001008845.1,RGD:1595786	RT1 class I, locus CE7	GO:0016021	integral component of membrane	rno04514,rno04144,rno04145,rno04218,rno04650,rno04612,rno05203,rno05320,rno05330,rno05332,rno05416,rno04940,rno05166,rno05168,rno05167,rno05169,rno05165	Cell adhesion molecules (CAMs)|Endocytosis|Phagosome|Cellular senescence|Natural killer cell mediated cytotoxicity|Antigen processing and presentation|Viral carcinogenesis|Autoimmune thyroid disease|Allograft rejection|Graft-versus-host disease|Viral myocarditis|Type I diabetes mellitus|HTLV-I infection|Herpes simplex infection|Kaposi's sarcoma-associated herpesvirus infection|Epstein-Barr virus …
TCONS_00023070	906.0850376	494.61699	1317.553085	2.663784528	1.413477389	0.026721649	1	Up	40.0729	22.23396	34.56075	76.49481	42.46813	124.7414	Chr20	4662325	4940319	-	XLOC_009747	XM_017601731.1	0	sense	genic	intronic	containing	RT1-CE3	GeneID:414793,Genbank:XM_017601731.1,RGD:1598231	RT1 class I, locus CE3, transcript variant X2	GO:0005886,GO:0016021	plasma membrane|integral component of membrane	rno04514,rno04144,rno04145,rno04218,rno04650,rno04612,rno05203,rno05320,rno05330,rno05332,rno05416,rno04940,rno05166,rno05168,rno05167,rno05169,rno05165	Cell adhesion molecules (CAMs)|Endocytosis|Phagosome|Cellular senescence|Natural killer cell mediated cytotoxicity|Antigen processing and presentation|Viral carcinogenesis|Autoimmune thyroid disease|Allograft rejection|Graft-versus-host disease|Viral myocarditis|Type I diabetes mellitus|HTLV-I infection|Herpes simplex infection|Kaposi's sarcoma-associated herpesvirus infection|Epstein-Barr virus …
TCONS_00023071	1069.039583	534.4365311	1603.642636	3.000623165	1.585262149	0.004367199	0.639846997	Up	20.78781	10.01899	14.49698	46.67186	24.55482	55.01091	Chr20	4665999	4770616	-	XLOC_009747	NM_001008845.1	0	sense	genic	intronic	containing	RT1-CE7	GeneID:368153,Genbank:NM_001008845.1,RGD:1595786	RT1 class I, locus CE7	GO:0016021	integral component of membrane	rno04514,rno04144,rno04145,rno04218,rno04650,rno04612,rno05203,rno05320,rno05330,rno05332,rno05416,rno04940,rno05166,rno05168,rno05167,rno05169,rno05165	Cell adhesion molecules (CAMs)|Endocytosis|Phagosome|Cellular senescence|Natural killer cell mediated cytotoxicity|Antigen processing and presentation|Viral carcinogenesis|Autoimmune thyroid disease|Allograft rejection|Graft-versus-host disease|Viral myocarditis|Type I diabetes mellitus|HTLV-I infection|Herpes simplex infection|Kaposi's sarcoma-associated herpesvirus infection|Epstein-Barr virus …
TCONS_00023113	42.93622027	17.03241429	68.84002624	4.041706892	2.0149647	0.006292965	0.810424453	Up	0.799902	0.6000417	0.9044287	1.433634	4.962648	2.75043	Chr20	4788669	4940320	-	XLOC_009747	NM_212490.2	0	sense	genic	intronic	containing	Atp6v1g2	GeneID:368044,Genbank:NM_212490.2,RGD:1303186	ATPase H+ transporting V1 subunit G2	GO:0016471,GO:0016887,GO:0030285,GO:1902600,GO:0008553	vacuolar proton-transporting V-type ATPase complex|ATPase activity|integral component of synaptic vesicle membrane|proton transmembrane transport|proton-exporting ATPase activity, phosphorylative mechanism	rno00190,rno04150,rno04145,rno04966,rno04721,rno05323	Oxidative phosphorylation|mTOR signaling pathway|Phagosome|Collecting duct acid secretion|Synaptic vesicle cycle|Rheumatoid arthritis
TCONS_00023117	1320.31309	680.0486152	1960.577565	2.882996187	1.527568929	0.005506335	0.725929256	Up	26.43445	26.92893	22.55625	71.05733	53.79811	81.42817	Chr20	4788670	4940259	-	XLOC_009747	XM_017601730.1	0	sense	genic	exonic	overlapping	RT1-CE3	GeneID:414793,Genbank:XM_017601730.1,RGD:1598231	RT1 class I, locus CE3, transcript variant X1	GO:0005886,GO:0016021	plasma membrane|integral component of membrane	rno04514,rno04144,rno04145,rno04218,rno04650,rno04612,rno05203,rno05320,rno05330,rno05332,rno05416,rno04940,rno05166,rno05168,rno05167,rno05169,rno05165	Cell adhesion molecules (CAMs)|Endocytosis|Phagosome|Cellular senescence|Natural killer cell mediated cytotoxicity|Antigen processing and presentation|Viral carcinogenesis|Autoimmune thyroid disease|Allograft rejection|Graft-versus-host disease|Viral myocarditis|Type I diabetes mellitus|HTLV-I infection|Herpes simplex infection|Kaposi's sarcoma-associated herpesvirus infection|Epstein-Barr virus …
TCONS_00023121	146.5496913	74.50732766	218.5920549	2.933832976	1.55278674	0.039044147	1	Up	9.159069	0.6244893	8.156838	20.51919	7.471503	21.22242	Chr20	4788982	4940259	-	XLOC_009747	NM_001008843.2	0	sense	genic	exonic	containing	RT1-CE5	GeneID:309607,Genbank:NM_001008843.2,RGD:1595868	RT1 class I, locus CE5, transcript variant 1	GO:0005886,GO:0006955,GO:0009986,GO:0016021,GO:0042605,GO:0042612,GO:0046978,GO:0046979,GO:0002474,GO:0005102,GO:0005783	plasma membrane|immune response|cell surface|integral component of membrane|peptide antigen binding|MHC class I protein complex|TAP1 binding|TAP2 binding|antigen processing and presentation of peptide antigen via MHC class I|signaling receptor binding|endoplasmic reticulum	rno04514,rno04144,rno04145,rno04218,rno04650,rno04612,rno05203,rno05320,rno05330,rno05332,rno05416,rno04940,rno05166,rno05168,rno05167,rno05169,rno05165	Cell adhesion molecules (CAMs)|Endocytosis|Phagosome|Cellular senescence|Natural killer cell mediated cytotoxicity|Antigen processing and presentation|Viral carcinogenesis|Autoimmune thyroid disease|Allograft rejection|Graft-versus-host disease|Viral myocarditis|Type I diabetes mellitus|HTLV-I infection|Herpes simplex infection|Kaposi's sarcoma-associated herpesvirus infection|Epstein-Barr virus …
TCONS_00023814	67.42530977	96.35486159	38.49575795	0.399520661	-1.323657983	0.04415503	1	Down	6.658444	10.66061	13.04128	2.851826	7.074436	2.224949	Chr3	18502016	18502582	+
TCONS_00024750	8.001265221	0.320270363	15.68226008	48.96569237	5.613699379	0.001143958	0.260646472	Up	1.20E-08	0.1318102	0.00418307	0.8573303	0.8233586	2.551803	Chr3	148276875	148284138	+	XLOC_010418	XM_006235265.3	0	antisense	genic	intronic	nested	Bcl2l1	GeneID:24888,Genbank:XM_006235265.3,RGD:2200	Bcl2-like 1, transcript variant X5	GO:0097371,GO:0098793,GO:0098794,GO:1900118,GO:1900244,GO:1900452,GO:1902042,GO:1902230,GO:1903077,GO:0005739,GO:0005740,GO:0005741,GO:0005743,GO:0007281,GO:0005759,GO:0007283,GO:0005783,GO:0007568,GO:0005813,GO:0008134,GO:0008283,GO:0008284,GO:0008584,GO:0021987,GO:0008630,GO:0030054,GO:0030276,GO:0009314,GO:0030672,GO:0031965,GO:0031966,GO:0001541,GO:0042981,GO:0032465,GO:0001666,GO:0043027,GO:…	MDM2/MDM4 family protein binding|presynapse|postsynapse|negative regulation of execution phase of apoptosis|positive regulation of synaptic vesicle endocytosis|regulation of long term synaptic depression|negative regulation of extrinsic apoptotic signaling pathway via death domain receptors|negative regulation of intrinsic apoptotic signaling pathway in response to DNA damage|negative regulation …	rno04014,rno04630,rno04064,rno04151,rno04140,rno04137,rno04210,rno04215,rno04621,rno05200,rno05202,rno05212,rno05225,rno05220,rno05222,rno05014,rno05166,rno05145,rno01521,rno01524	Ras signaling pathway|Jak-STAT signaling pathway|NF-kappa B signaling pathway|PI3K-Akt signaling pathway|Autophagy - animal|Mitophagy - animal|Apoptosis|Apoptosis - multiple species|NOD-like receptor signaling pathway|Pathways in cancer|Transcriptional misregulation in cancers|Pancreatic cancer|Hepatocellular carcinoma|Chronic myeloid leukemia|Small cell lung cancer|Amyotrophic lateral sclerosis …
TCONS_00025305	390.534311	208.043943	573.024679	2.754344446	1.461708988	0.038610994	1	Up	2.219265	2.121892	1.82011	5.911401	2.147982	7.783027	Chr3	12178962	12241789	-	XLOC_010681	XM_008761789.2	0	sense	genic	intronic	overlapping	Ralgps1	GeneID:100361774,Genbank:XM_008761789.2,RGD:2319500	Ral GEF with PH domain and SH3 binding motif 1, transcript variant X10	GO:0032485,GO:0005622,GO:0007264,GO:0008321	regulation of Ral protein signal transduction|intracellular|small GTPase mediated signal transduction|Ral guanyl-nucleotide exchange factor activity
TCONS_00025508	137.0546241	24.57926212	249.5299861	10.15205358	3.343699684	0.001966528	0.379881921	Up	0.523827	0.4447976	0.3877447	4.130729	1.577011	7.062347	Chr3	48522384	48592865	-	XLOC_010756	NM_138850.1	0	sense	genic	intronic	overlapping	Fap	GeneID:192203,Genbank:NM_138850.1,RGD:621253	fibroblast activation protein, alpha	GO:1902362,GO:0045177,GO:0005178,GO:1903054,GO:0045178,GO:0005615,GO:0051603,GO:0005886,GO:0006508,GO:0008233,GO:0008236,GO:0008239,GO:0060244,GO:0009986,GO:0071158,GO:0010710,GO:0071438,GO:0010716,GO:0071850,GO:0030027,GO:0002020,GO:0097325,GO:0042803,GO:0004175,GO:1900119,GO:0043542,GO:0004252	melanocyte apoptotic process|apical part of cell|integrin binding|negative regulation of extracellular matrix organization|basal part of cell|extracellular space|proteolysis involved in cellular protein catabolic process|plasma membrane|proteolysis|peptidase activity|serine-type peptidase activity|dipeptidyl-peptidase activity|negative regulation of cell proliferation involved in contact inhibiti…
TCONS_00025509	42.55490816	7.268307787	77.84150853	10.7097155	3.42084825	5.93E-05	0.031464297	Up	0.3826495	0.8050718	0.05264728	4.326893	2.085406	5.865627	Chr3	48531621	48598142	-	XLOC_010757	NM_138850.1	0	sense	genic	intronic	overlapping	Fap	GeneID:192203,Genbank:NM_138850.1,RGD:621253	fibroblast activation protein, alpha	GO:1902362,GO:0045177,GO:0005178,GO:1903054,GO:0045178,GO:0005615,GO:0051603,GO:0005886,GO:0006508,GO:0008233,GO:0008236,GO:0008239,GO:0060244,GO:0009986,GO:0071158,GO:0010710,GO:0071438,GO:0010716,GO:0071850,GO:0030027,GO:0002020,GO:0097325,GO:0042803,GO:0004175,GO:1900119,GO:0043542,GO:0004252	melanocyte apoptotic process|apical part of cell|integrin binding|negative regulation of extracellular matrix organization|basal part of cell|extracellular space|proteolysis involved in cellular protein catabolic process|plasma membrane|proteolysis|peptidase activity|serine-type peptidase activity|dipeptidyl-peptidase activity|negative regulation of cell proliferation involved in contact inhibiti…
TCONS_00026162	45.21738411	75.36256562	15.07220261	0.19999588	-2.321957817	0.009401812	1	Down	3.376321	4.271317	6.677013	0.117593	2.809817	0.06018331	Chr3	142441537	142454311	-	XLOC_011003	XM_006235139.2	54044	antisense	intergenic	downstream	convergent	Foxa2	GeneID:25099,Genbank:XM_006235139.2,RGD:2808	forkhead box A2, transcript variant X1	GO:0001708,GO:0003677,GO:0003690,GO:0003700,GO:0006357,GO:0003705,GO:0006366,GO:0005515,GO:0007219,GO:0007389,GO:0008134,GO:0008344,GO:0023019,GO:0030054,GO:0009653,GO:0030154,GO:0030193,GO:0030324,GO:0031018,GO:0032525,GO:0000432,GO:0045893,GO:0032868,GO:0000978,GO:0045944,GO:0033132,GO:0040019,GO:0000981,GO:0001077,GO:0045945,GO:0001205,GO:0046332,GO:0001228,GO:0048468,GO:0001701,GO:2000971,GO:…	cell fate specification|DNA binding|double-stranded DNA binding|DNA binding transcription factor activity|regulation of transcription by RNA polymerase II|transcription factor activity, RNA polymerase II distal enhancer sequence-specific binding|transcription by RNA polymerase II|protein binding|Notch signaling pathway|pattern specification process|transcription factor binding|adult locomotory be…	rno04213,rno04950	Longevity regulating pathway - multiple species|Maturity onset diabetes of the young
TCONS_00026745	535.8488452	114.055847	957.6418433	8.396253836	3.069745783	0.003661258	0.570770824	Up	2.354466	1.485996	1.671931	13.93842	5.266139	24.10479	Chr4	31208798	31225180	+	XLOC_011240	XM_008762740.2	0	antisense	genic	intronic	nested	Slc25a13	GeneID:362322,Genbank:XM_008762740.2,RGD:1565889	solute carrier family 25 member 13, transcript variant X2	GO:0022857,GO:0005509,GO:0043490,GO:0005575,GO:0005739,GO:0005743,GO:0006754,GO:0006839,GO:0008150,GO:0045333,GO:0015183,GO:0051592,GO:0015810,GO:0003674,GO:0015813,GO:0005313,GO:0016021	transmembrane transporter activity|calcium ion binding|malate-aspartate shuttle|cellular_component|mitochondrion|mitochondrial inner membrane|ATP biosynthetic process|mitochondrial transport|biological_process|cellular respiration|L-aspartate transmembrane transporter activity|response to calcium ion|aspartate transmembrane transport|molecular_function|L-glutamate transmembrane transport|L-glutam…
TCONS_00026759	508.0164039	109.8323208	906.2004869	8.250763348	3.044527602	7.26E-05	0.033932579	Up	4.325267	4.024786	3.903165	34.82461	15.95108	43.86404	Chr4	31319153	31320810	+	XLOC_011241	XM_008762739.1	0	antisense	genic	intronic	nested	Slc25a13	GeneID:362322,Genbank:XM_008762739.1,RGD:1565889	solute carrier family 25 member 13, transcript variant X1	GO:0022857,GO:0005509,GO:0043490,GO:0005575,GO:0005739,GO:0005743,GO:0006754,GO:0006839,GO:0008150,GO:0045333,GO:0015183,GO:0051592,GO:0015810,GO:0003674,GO:0015813,GO:0005313,GO:0016021	transmembrane transporter activity|calcium ion binding|malate-aspartate shuttle|cellular_component|mitochondrion|mitochondrial inner membrane|ATP biosynthetic process|mitochondrial transport|biological_process|cellular respiration|L-aspartate transmembrane transporter activity|response to calcium ion|aspartate transmembrane transport|molecular_function|L-glutamate transmembrane transport|L-glutam…
TCONS_00026760	196.807322	40.82426442	352.7903795	8.641683678	3.111312423	0.008121363	0.94413353	Up	9.345049	1.900018	8.454673	62.91669	11.97232	83.88212	Chr4	31319181	31320809	+	XLOC_011241	XM_008762740.2	0	antisense	genic	intronic	nested	Slc25a13	GeneID:362322,Genbank:XM_008762740.2,RGD:1565889	solute carrier family 25 member 13, transcript variant X2	GO:0022857,GO:0005509,GO:0043490,GO:0005575,GO:0005739,GO:0005743,GO:0006754,GO:0006839,GO:0008150,GO:0045333,GO:0015183,GO:0051592,GO:0015810,GO:0003674,GO:0015813,GO:0005313,GO:0016021	transmembrane transporter activity|calcium ion binding|malate-aspartate shuttle|cellular_component|mitochondrion|mitochondrial inner membrane|ATP biosynthetic process|mitochondrial transport|biological_process|cellular respiration|L-aspartate transmembrane transporter activity|response to calcium ion|aspartate transmembrane transport|molecular_function|L-glutamate transmembrane transport|L-glutam…
TCONS_00026909	29.8577053	4.575057643	55.14035296	12.05238431	3.591246677	0.001648768	0.332976144	Up	0.4824363	1.63E-08	0.04645284	1.953368	0.6281851	2.759533	Chr4	66900077	66926040	+	XLOC_011316	XM_006236346.3	0	antisense	genic	exonic	overlapping	Parp12	GeneID:362343,Genbank:XM_006236346.3,RGD:1308628	poly (ADP-ribose) polymerase family, member 12, transcript variant X2	GO:0003950,GO:0046872	NAD+ ADP-ribosyltransferase activity|metal ion binding
TCONS_00028060	243.8689053	118.7069881	369.0308225	3.108753986	1.636336452	0.010734042	1	Up	2.893663	3.963841	3.534348	9.17906	5.809571	15.97638	Chr4	66345519	66436228	-	XLOC_011821	XM_008762778.2	0	antisense	genic	intronic	overlapping	Luc7l2	GeneID:312251,Genbank:XM_008762778.2,RGD:1308651	LUC7-like 2 pre-mRNA splicing factor, transcript variant X1	GO:0019899,GO:0071004,GO:0003729,GO:0005685,GO:0006376	enzyme binding|U2-type prespliceosome|mRNA binding|U1 snRNP|mRNA splice site selection
TCONS_00028272	33.81953794	2.412348918	65.22672697	27.03867856	4.75695274	0.000135253	0.057231465	Up	0.9666562	0	0	7.46804	2.922868	12.12568	Chr4	88603833	88604190	-	XLOC_011889	XM_008762963.2	2661	sense	intergenic	downstream	same_strand	Herc6	GeneID:362376,Genbank:XM_008762963.2,RGD:1561739	HECT and RLD domain containing E3 ubiquitin protein ligase family member 6, transcript variant X2	GO:0005634,GO:0005737,GO:0005829,GO:0016567,GO:0061630,GO:0002244,GO:0004842	nucleus|cytoplasm|cytosol|protein ubiquitination|ubiquitin protein ligase activity|hematopoietic progenitor cell differentiation|ubiquitin-protein transferase activity
TCONS_00030445	38.32850451	8.259341991	68.39766702	8.28124893	3.049848363	0.008287465	0.94413353	Up	0.3059771	0.4143439	0.5180538	2.936658	1.099129	5.733283	Chr5	56508424	56509639	-	XLOC_012854	NM_001106645.1	0	sense	genic	intronic	nested	Ddx58	GeneID:297989,Genbank:NM_001106645.1,RGD:1309460	DEXD/H-box helicase 58	GO:0043330,GO:0032587,GO:0003727,GO:0045087,GO:0032725,GO:0005524,GO:0045944,GO:0032727,GO:0005737,GO:0051607,GO:0005829,GO:0005923,GO:0008270,GO:0009597,GO:0032728,GO:0009615,GO:0060760,GO:0032755,GO:0010628,GO:0071360,GO:0032757,GO:0015629,GO:1902741,GO:0035549,GO:0016787,GO:0002230,GO:1904469,GO:0039529,GO:0030334,GO:0003690,GO:2000778,GO:0042802,GO:0031625,GO:0003725	response to exogenous dsRNA|ruffle membrane|single-stranded RNA binding|innate immune response|positive regulation of granulocyte macrophage colony-stimulating factor production|ATP binding|positive regulation of transcription by RNA polymerase II|positive regulation of interferon-alpha production|cytoplasm|defense response to virus|cytosol|bicellular tight junction|zinc ion binding|detection of …	rno04064,rno04622,rno04623,rno05162,rno05164,rno05161,rno05160,rno05168,rno05169	NF-kappa B signaling pathway|RIG-I-like receptor signaling pathway|Cytosolic DNA-sensing pathway|Measles|Influenza A|Hepatitis B|Hepatitis C|Herpes simplex infection|Epstein-Barr virus infection
TCONS_00030805	45.93981883	25.12484584	66.75479182	2.656923439	1.409756656	0.038566175	1	Up	0.9152374	0.67175	0.3390783	0.933268	1.360304	2.50791	Chr5	117376374	117431406	-	XLOC_013006	XM_008763868.2	0	sense	genic	exonic	overlapping	Kank4	GeneID:313385,Genbank:XM_008763868.2,RGD:1307635	KN motif and ankyrin repeat domains 4, transcript variant X1	GO:0005856,GO:0015630,GO:0030837,GO:0005737,GO:0005829	cytoskeleton|microtubule cytoskeleton|negative regulation of actin filament polymerization|cytoplasm|cytosol
TCONS_00031835	10.03536682	19.75854492	0.312188723	0.015800188	-5.983914474	0.006931112	0.8554147	Down	1.04E-13	1.098595	0.8296204	1.28E-18	0.0315499	2.08E-09	Chr6	49973411	49974741	+	XLOC_013449	NM_001025051.1	0	sense	genic	exonic	overlapping	Fam110c	GeneID:500638,Genbank:NM_001025051.1,RGD:1564713	family with sequence similarity 110, member C	GO:0060491,GO:0005874,GO:0005938,GO:0030335,GO:0043014,GO:0051897,GO:0000922,GO:0005634,GO:0005815	regulation of cell projection assembly|microtubule|cell cortex|positive regulation of cell migration|alpha-tubulin binding|positive regulation of protein kinase B signaling|spindle pole|nucleus|microtubule organizing center
TCONS_00032521	2.707202455	0	5.414404909	Inf	Inf	0.036752612	1	Up	3.86E-12	3.65E-10	4.27E-15	0.2271913	1.61E-10	0.182795	Chr6	10768320	10843901	-	XLOC_013740	NM_139253.1	43402	sense	intergenic	downstream	same_strand	Mcfd2	GeneID:246117,Genbank:NM_139253.1,RGD:628690	multiple coagulation factor deficiency 2	GO:0005783,GO:0005793,GO:0005794,GO:0007420,GO:0015031,GO:0016192,GO:0019752,GO:0060548,GO:0003674,GO:0005509,GO:0005576	endoplasmic reticulum|endoplasmic reticulum-Golgi intermediate compartment|Golgi apparatus|brain development|protein transport|vesicle-mediated transport|carboxylic acid metabolic process|negative regulation of cell death|molecular_function|calcium ion binding|extracellular region
TCONS_00033729	728.6044819	338.8104063	1118.398558	3.300956927	1.722884313	0.002108656	0.390364904	Up	2.960853	13.73856	3.292674	23.93226	15.85512	22.15999	Chr7	44531124	44533569	+
TCONS_00034086	356.4337002	57.59819953	655.2692009	11.37655702	3.507992103	0.000750806	0.202171459	Up	1.028025	0.7872333	0.9411983	9.298997	4.155257	16.37353	Chr7	118714868	118968153	+	XLOC_014432	XM_006241951.3	0	sense	genic	exonic	overlapping	LOC100911562	GeneID:100911562,Genbank:XM_006241951.3,RGD:6491840	apolipoprotein L3-like, transcript variant X1	GO:0042157,GO:0005576,GO:0006869,GO:0008289	lipoprotein metabolic process|extracellular region|lipid transport|lipid binding
TCONS_00035223	700.3571284	452.2546292	948.4596276	2.097180584	1.068451095	0.048997329	1	Up	4.170554	4.652097	5.326963	10.29532	7.696029	10.36466	Chr7	116362286	116406527	-	XLOC_014926	XM_017595247.1	0	sense	genic	intronic	containing	LOC300024	GeneID:300024,Genbank:XM_017595247.1,RGD:1586182	similar to Ly6-B antigen gene, transcript variant X1
TCONS_00035226	319.3588205	106.6998235	532.0178175	4.986117129	2.317916774	0.018205333	1	Up	3.99477	3.201897	1.852122	11.58259	5.957792	24.34434	Chr7	116371643	116375239	-	XLOC_014927	XM_017595248.1	0	sense	genic	intronic	overlapping	LOC300024	GeneID:300024,Genbank:XM_017595248.1,RGD:1586182	similar to Ly6-B antigen gene, transcript variant X2
TCONS_00035227	59.15720491	23.65782017	94.65658965	4.001069793	2.000385795	0.045054304	1	Up	5.528854	1.00274	2.659529	14.40424	2.929475	15.63989	Chr7	116371643	116375239	-	XLOC_014927	XM_017595247.1	0	sense	genic	intronic	overlapping	LOC300024	GeneID:300024,Genbank:XM_017595247.1,RGD:1586182	similar to Ly6-B antigen gene, transcript variant X1
TCONS_00038399	40.75482026	81.50964053	0	0	#NAME?	2.09E-13	1.52E-09	Down	4.162165	2.762896	3.517285	6.59E-17	1.57E-19	2.69E-17	Chr9	81020377	81022014	+
TCONS_00038480	31.70205348	13.13004697	50.27405998	3.828932226	1.936942124	0.010012483	1	Up	1.86579	1.772413	0.9728917	5.499675	3.007473	7.613617	Chr9	90934496	90938530	+	XLOC_016353	XM_006245337.3	0	sense	genic	intronic	overlapping	LOC100911733	GeneID:100911733,Genbank:XM_006245337.3,RGD:6491475	nuclear body protein SP140-like
TCONS_00038591	25.51631383	40.79375596	10.23887171	0.25099115	-1.994291602	0.0102107	1	Down	1.309995	1.47401	0.7849795	0.2437367	0.04408362	0.5412547	Chr9	98221602	98226405	+	XLOC_016389	XM_006245462.3	0	sense	genic	intronic	nested	Lrrfip1	GeneID:367314,Genbank:XM_006245462.3,RGD:1359548	LRR binding FLII interacting protein 1, transcript variant X24	GO:0003677,GO:0005634,GO:0005737,GO:0005829,GO:0005886,GO:0006351,GO:0042803,GO:0045296,GO:0051092,GO:0000122,GO:0000978,GO:0001078	DNA binding|nucleus|cytoplasm|cytosol|plasma membrane|transcription, DNA-templated|protein homodimerization activity|cadherin binding|positive regulation of NF-kappaB transcription factor activity|negative regulation of transcription by RNA polymerase II|RNA polymerase II proximal promoter sequence-specific DNA binding|transcriptional repressor activity, RNA polymerase II proximal promoter sequen…
TCONS_00039933	9.573357966	0.353447036	18.7932689	53.17138631	5.732578176	0.001016477	0.248313804	Up	1.19E-13	4.26E-12	0.1251982	1.152038	2.390937	5.605992	ChrX	106667478	106668080	+	XLOC_016996	XM_003752111.4	31275	antisense	intergenic	upstream	divergent	LOC680191	GeneID:680191,Genbank:XM_003752111.4,RGD:1595433	similar to UPF0197 protein C11orf10 homolog
XR_001836177.1	33.62600371	49.66768155	17.58432588	0.354039595	-1.498017376	0.042624849	1	Down	0.2751245	0.2445396	0.2394923	0.0348975	0.1803358	0.04633895	Chr1	277554426	277592515	+	LOC102547814	XM_017590399.1	11086	antisense	intergenic	downstream	convergent	Ccdc186	GeneID:361773,Genbank:XM_017590399.1,RGD:1307158	coiled-coil domain containing 186, transcript variant X1
XR_001836356.1	270.4367239	445.1325702	95.74087765	0.215083964	-2.21702813	0.004401468	0.639846997	Down	19.47042	36.91242	14.79981	2.64278	11.10639	1.19684	Chr1	240561951	240565037	-	LOC108349824	NM_001191562.1	0	antisense	genic	intronic	nested	Trpm3	GeneID:309407,Genbank:NM_001191562.1,RGD:1304888	transient receptor potential cation channel, subfamily M, member 3	GO:0016021,GO:0016048,GO:0050951,GO:0051262,GO:0098655,GO:0005227,GO:0005261,GO:0006812	integral component of membrane|detection of temperature stimulus|sensory perception of temperature stimulus|protein tetramerization|cation transmembrane transport|calcium activated cation channel activity|cation channel activity|cation transport
XR_001836514.1	11.53071308	19.96306653	3.098359631	0.155204594	-2.687756836	0.01312958	1	Down	0.4571537	0.1125215	0.166469	0.07006234	0.000619231	0.02658098	Chr2	5635238	5805106	+	LOC102549789	XM_008760627.2	1363	sense	intergenic	downstream	same_strand	LOC684998	GeneID:684998,Genbank:XM_008760627.2,RGD:1584363	hypothetical protein LOC684998, transcript variant X1
XR_001836574.1	38.30462956	55.59975471	21.0095044	0.377870451	-1.404036388	0.046342579	1	Down	0.4878808	0.5249797	0.5681456	0.1659729	0.1575665	0.2587852	Chr2	38909557	38932901	-	LOC103691449	XM_006231909.2	45141	sense	intergenic	downstream	same_strand	Zswim6	GeneID:310062,Genbank:XM_006231909.2,RGD:1306624	zinc finger, SWIM-type containing 6, transcript variant X1	GO:0048812,GO:1902667,GO:2001222,GO:0016021,GO:0031462,GO:0032420	neuron projection morphogenesis|regulation of axon guidance|regulation of neuron migration|integral component of membrane|Cul2-RING ubiquitin ligase complex|stereocilium
XR_001836594.1	121.5083929	44.15142812	198.8653576	4.504165914	2.171259971	0.00042941	0.146759071	Up	0.9614619	0.4400437	0.4854468	2.548189	1.808899	3.509498	Chr2	52671054	52679414	+	LOC102556643	XM_008760830.2	11283	sense	intergenic	upstream	same_strand	LOC103691495	GeneID:103691495,Genbank:XM_008760830.2,RGD:9211960	annexin-2 receptor-like
XR_001836930.1	2.891394891	0	5.782789782	Inf	Inf	0.034605589	1	Up	0.001581695	6.70E-12	0.000415871	0.01284252	0.0394932	0.002905176	Chr2	244002093	244026113	-	LOC102547266	NM_001004090.2	32073	antisense	intergenic	upstream	divergent	Tspan5	GeneID:362048,Genbank:NM_001004090.2,RGD:1303176	tetraspanin 5	GO:0007166,GO:0008283,GO:0016021,GO:0019899,GO:0045747,GO:0051604,GO:0072659,GO:0005886,GO:0005887,GO:0007155	cell surface receptor signaling pathway|cell proliferation|integral component of membrane|enzyme binding|positive regulation of Notch signaling pathway|protein maturation|protein localization to plasma membrane|plasma membrane|integral component of plasma membrane|cell adhesion
XR_001836935.1	12.54402191	0	25.08804382	Inf	Inf	0.000827681	0.21631696	Up	0	0	0	2.132616	0.5640797	4.848305	Chr2	248461363	248465386	-	LOC102553780	XM_003749410.4	0	sense	genic	intronic	nested	Gbp3	GeneID:685116,Genbank:XM_003749410.4,RGD:1597766	guanylate binding protein 3, transcript variant X2	GO:0003924,GO:0005525	GTPase activity|GTP binding	rno04621	NOD-like receptor signaling pathway
XR_001837221.1	8.119827291	13.90727503	2.332379557	0.167709314	-2.57596528	0.033687812	1	Down	0.05293901	0.2899281	0.2005047	0.03373255	0.01474408	0.0396837	Chr3	114310469	114351861	+	LOC102557338	XM_008762216.2	3135	antisense	intergenic	upstream	divergent	Shf	GeneID:362205,Genbank:XM_008762216.2,RGD:1562705	Src homology 2 domain containing F
XR_001837230.1	3.772750282	0.301543615	7.243956949	24.02291607	4.586339381	0.031610294	1	Up	0.02832615	0	0	0.1981547	0.2359416	0.07904324	Chr3	117900747	117904491	+	LOC108350457	NM_001191065.1	0	antisense	genic	intronic	nested	Shc4	GeneID:679845,Genbank:NM_001191065.1,RGD:1583644	SHC adaptor protein 4	GO:0007169,GO:0008284,GO:0010468,GO:0019901,GO:0019904,GO:0030971,GO:0035556,GO:0048863,GO:0005622,GO:0005886,GO:0006915	transmembrane receptor protein tyrosine kinase signaling pathway|positive regulation of cell proliferation|regulation of gene expression|protein kinase binding|protein domain specific binding|receptor tyrosine kinase binding|intracellular signal transduction|stem cell differentiation|intracellular|plasma membrane|apoptotic process	rno04014,rno04012,rno04072,rno04510,rno04650,rno04062,rno04910,rno04915,rno04917,rno04926,rno04722,rno05206,rno05225,rno05226,rno05214,rno05220,rno05224,rno05034,rno05100,rno01521,rno01522	Ras signaling pathway|ErbB signaling pathway|Phospholipase D signaling pathway|Focal adhesion|Natural killer cell mediated cytotoxicity|Chemokine signaling pathway|Insulin signaling pathway|Estrogen signaling pathway|Prolactin signaling pathway|Relaxin signaling pathway|Neurotrophin signaling pathway|MicroRNAs in cancer|Hepatocellular carcinoma|Gastric cancer|Glioma|Chronic myeloid leukemia|Breas…
XR_001837523.1	23.22428038	1.917345355	44.5312154	23.2254535	4.537634862	0.04603275	1	Up	0.0226354	0.02184004	0.01070822	0.2718644	0.01055344	0.8464598	Chr4	27504519	27509129	-	LOC108350667	XM_006236050.2	0	antisense	genic	intronic	nested	Ankib1	GeneID:368062,Genbank:XM_006236050.2,RGD:1597088	ankyrin repeat and IBR domain containing 1, transcript variant X3	GO:0005737,GO:0016567,GO:0031624,GO:0032436,GO:0046872,GO:0061630,GO:0000151,GO:0000209,GO:0004842	cytoplasm|protein ubiquitination|ubiquitin conjugating enzyme binding|positive regulation of proteasomal ubiquitin-dependent protein catabolic process|metal ion binding|ubiquitin protein ligase activity|ubiquitin ligase complex|protein polyubiquitination|ubiquitin-protein transferase activity
XR_001837541.1	2.93020796	5.860415919	0	0	#NAME?	0.024433303	1	Down	0.1850348	0.09749503	0.000668945	1.33E-14	0.005839657	0.000168415	Chr4	44638421	44668178	-	LOC103692063	XM_006236130.3	8215	antisense	intergenic	downstream	convergent	Cav1	GeneID:25404,Genbank:XM_006236130.3,RGD:2280	caveolin 1, transcript variant X1	GO:0045907,GO:0046426,GO:0046785,GO:0046982,GO:0048365,GO:0051117,GO:0048471,GO:0051259,GO:0051260,GO:0051384,GO:0051480,GO:0061099,GO:0051592,GO:0070320,GO:0051899,GO:0070373,GO:0070382,GO:0070836,GO:0086091,GO:0086098,GO:0071260,GO:0016504,GO:0090090,GO:0019065,GO:0019217,GO:0001525,GO:0090263,GO:1901844,GO:0019899,GO:0001570,GO:0090398,GO:0019900,GO:1903361,GO:0097190,GO:0030674,GO:0019901,GO:…	positive regulation of vasoconstriction|negative regulation of JAK-STAT cascade|microtubule polymerization|protein heterodimerization activity|Rac GTPase binding|ATPase binding|perinuclear region of cytoplasm|protein complex oligomerization|protein homooligomerization|response to glucocorticoid|regulation of cytosolic calcium ion concentration|negative regulation of protein tyrosine kinase activi…	rno04144,rno04510,rno05205,rno05418,rno05416,rno05100	Endocytosis|Focal adhesion|Proteoglycans in cancer|Fluid shear stress and atherosclerosis|Viral myocarditis|Bacterial invasion of epithelial cells
XR_001837617.1	17.29646921	29.93907439	4.653864039	0.155444486	-2.68552865	0.002807891	0.47753544	Down	0.7402248	0.6839365	0.2932368	0.09688281	0.05098842	0.09337039	Chr4	113497559	113502453	+	LOC102547728	NM_001108634.1	104	antisense	intergenic	upstream	divergent	Pole4	GeneID:362385,Genbank:NM_001108634.1,RGD:1307793	polymerase (DNA) epsilon 4, accessory subunit	GO:0008150,GO:0008622,GO:0043966,GO:0046982,GO:0003674,GO:0005575,GO:0005671	biological_process|epsilon DNA polymerase complex|histone H3 acetylation|protein heterodimerization activity|molecular_function|cellular_component|Ada2/Gcn5/Ada3 transcription activator complex	rno00230,rno00240,rno03030,rno03410,rno03420,rno05166	Purine metabolism|Pyrimidine metabolism|DNA replication|Base excision repair|Nucleotide excision repair|HTLV-I infection
XR_001837634.1	66.09892346	112.5876475	19.61019945	0.174177185	-2.521372437	0.000121085	0.053798266	Down	1.191763	1.27251	1.15232	0.3093166	0.000362197	0.2680584	Chr4	120944213	120958941	-	LOC102555035	XM_017593019.1	81869	antisense	intergenic	upstream	divergent	Prr20e	GeneID:685621,Genbank:XM_017593019.1,RGD:1591392	proline rich 20E
XR_001837726.1	50.19563684	78.39275872	21.99851496	0.280619222	-1.83331426	0.008051427	0.94413353	Down	0.9508999	1.130898	1.074301	0.1441672	0.7390681	0.005109068	Chr4	162421606	162440495	-	LOC100912974	NM_001085402.1	0	antisense	genic	intronic	overlapping	Clec2d2	GeneID:362445,Genbank:NM_001085402.1,RGD:1562831	C-type lectin domain family 2 member D2	GO:0005886,GO:0016021,GO:0030246	plasma membrane|integral component of membrane|carbohydrate binding
XR_001837812.1	5.460575387	10.57083762	0.350313148	0.033139583	-4.915300751	0.015274132	1	Down	1.044936	0.9528556	1.02E-25	0.07341772	1.33E-15	4.60E-11	Chr4	180820015	180830184	-	LOC102553163	NM_031046.3	19927	sense	intergenic	upstream	same_strand	Itpr2	GeneID:81678,Genbank:NM_031046.3,RGD:69649	inositol 1,4,5-trisphosphate receptor, type 2	GO:0005634,GO:0005737,GO:0005783,GO:0005789,GO:0030659,GO:0030667,GO:0033017,GO:0005886,GO:0035091,GO:0043209,GO:0043235,GO:0048016,GO:0051209,GO:0001666,GO:0005220,GO:0005509,GO:0005515,GO:0005938,GO:0006816,GO:0015278,GO:0016020,GO:0016021,GO:0016529,GO:0070588,GO:0070679,GO:0030424,GO:0071320,GO:0071361,GO:0071456,GO:0097110	nucleus|cytoplasm|endoplasmic reticulum|endoplasmic reticulum membrane|cytoplasmic vesicle membrane|secretory granule membrane|sarcoplasmic reticulum membrane|plasma membrane|phosphatidylinositol binding|myelin sheath|receptor complex|inositol phosphate-mediated signaling|release of sequestered calcium ion into cytosol|response to hypoxia|inositol 1,4,5-trisphosphate-sensitive calcium-release cha…	rno04371,rno04020,rno04070,rno04022,rno04114,rno04210,rno04218,rno04540,rno04611,rno04621,rno04625,rno04922,rno04912,rno04915,rno04921,rno04918,rno04924,rno04925,rno04927,rno04270,rno04970,rno04971,rno04972,rno04724,rno04725,rno04728,rno04726,rno04720,rno04730,rno04723,rno04750,rno05205,rno05010,rno04934,rno05167	Apelin signaling pathway|Calcium signaling pathway|Phosphatidylinositol signaling system|cGMP - PKG signaling pathway|Oocyte meiosis|Apoptosis|Cellular senescence|Gap junction|Platelet activation|NOD-like receptor signaling pathway|C-type lectin receptor signaling pathway|Glucagon signaling pathway|GnRH signaling pathway|Estrogen signaling pathway|Oxytocin signaling pathway|Thyroid hormone synthe…
XR_001838416.1	27.32718163	40.77989841	13.87446486	0.340228039	-1.555426054	0.034785118	1	Down	2.144519	1.438275	0.6086158	0.4229357	0.2089372	0.658011	Chr6	75622773	75625475	+	LOC102548522	NM_001108711.1	1452	antisense	intergenic	downstream	convergent	Snx6	GeneID:362738,Genbank:NM_001108711.1,RGD:1304647	sorting nexin 6	GO:0034713,GO:0005764,GO:0035091,GO:0005768,GO:0042147,GO:0005829,GO:0006886,GO:0006897,GO:0042803,GO:0016050,GO:0045892,GO:0019898,GO:0071364,GO:0030512,GO:0097422,GO:0030904,GO:0003674,GO:1903593,GO:0031901,GO:0005737,GO:0034452	type I transforming growth factor beta receptor binding|lysosome|phosphatidylinositol binding|endosome|retrograde transport, endosome to Golgi|cytosol|intracellular protein transport|endocytosis|protein homodimerization activity|vesicle organization|negative regulation of transcription, DNA-templated|extrinsic component of membrane|cellular response to epidermal growth factor stimulus|negative re…	rno04144	Endocytosis
XR_001838477.1	13.41933879	21.30268942	5.535988168	0.259872735	-1.944122814	0.042319717	1	Down	0.6305217	1.390066	0.5284535	0.08440622	0.04507428	0.5312018	Chr6	100073755	100075787	+	LOC102546833	XM_006240248.3	62301	antisense	intergenic	upstream	divergent	Max	GeneID:60661,Genbank:XM_006240248.3,RGD:621101	MYC associated factor X, transcript variant X1	GO:0003700,GO:0005515,GO:0005634,GO:0005737,GO:0006351,GO:0006355,GO:0045944,GO:0046982,GO:0006357,GO:0009267,GO:0048678,GO:0051402,GO:0060041,GO:0065003,GO:0070888,GO:0071339,GO:0000122,GO:0000790,GO:0000977,GO:0000978,GO:0000983,GO:0001078,GO:0001227,GO:0003677,GO:0010243,GO:0010629,GO:0016605,GO:0030425,GO:0032868,GO:0032993,GO:0042803,GO:0071375,GO:0090575,GO:0043565,GO:0044877	DNA binding transcription factor activity|protein binding|nucleus|cytoplasm|transcription, DNA-templated|regulation of transcription, DNA-templated|positive regulation of transcription by RNA polymerase II|protein heterodimerization activity|regulation of transcription by RNA polymerase II|cellular response to starvation|response to axon injury|neuron apoptotic process|retina development in camer…	rno04010,rno05200,rno05202,rno05222	MAPK signaling pathway|Pathways in cancer|Transcriptional misregulation in cancers|Small cell lung cancer
XR_001838762.1	37.63011665	55.03677835	20.22345496	0.367453466	-1.444366535	0.046252182	1	Down	0.4306605	0.8118354	0.619973	0.1016898	0.404273	0.1790732	Chr7	20382314	20386892	-	LOC102552467	XM_017595188.1	0	antisense	genic	intronic	nested	RGD1564409	GeneID:314670,Genbank:XM_017595188.1,RGD:1564409	similar to hypothetical protein 4930509O22, transcript variant X1
XR_001838945.1	4.607803423	8.569439253	0.646167593	0.075403719	-3.729220502	0.033360062	1	Down	0.02380804	0.1194654	0.06940721	0.000300534	7.23E-13	0.01820865	Chr7	102648440	102871316	+	Pvt1	NM_012603.2	57200	sense	intergenic	downstream	same_strand	Myc	GeneID:24577,Genbank:NM_012603.2,RGD:3130	myelocytomatosis oncogene	GO:0043066,GO:0043085,GO:0043279,GO:0043280,GO:0000987,GO:0001077,GO:0043388,GO:0001541,GO:0043473,GO:0001658,GO:0045787,GO:0043565,GO:0045821,GO:0044195,GO:0001701,GO:0045893,GO:0044330,GO:0001783,GO:0005634,GO:0002053,GO:0045944,GO:0002082,GO:0050910,GO:0046325,GO:0005635,GO:0051276,GO:0046722,GO:0005654,GO:0046982,GO:0051782,GO:0006352,GO:0006355,GO:0005719,GO:0051973,GO:0005730,GO:0060070,GO:…	negative regulation of apoptotic process|positive regulation of catalytic activity|response to alkaloid|positive regulation of cysteine-type endopeptidase activity involved in apoptotic process|proximal promoter sequence-specific DNA binding|transcriptional activator activity, RNA polymerase II proximal promoter sequence-specific DNA binding|positive regulation of DNA binding|ovarian follicle dev…	rno04010,rno04012,rno04310,rno04350,rno04390,rno04630,rno04151,rno04110,rno04218,rno04550,rno04919,rno05200,rno05230,rno05202,rno05206,rno05205,rno05210,rno05225,rno05226,rno05216,rno05221,rno05220,rno05219,rno05213,rno05224,rno05222,rno05166,rno05161,rno05167,rno05169	MAPK signaling pathway|ErbB signaling pathway|Wnt signaling pathway|TGF-beta signaling pathway|Hippo signaling pathway|Jak-STAT signaling pathway|PI3K-Akt signaling pathway|Cell cycle|Cellular senescence|Signaling pathways regulating pluripotency of stem cells|Thyroid hormone signaling pathway|Pathways in cancer|Central carbon metabolism in cancer|Transcriptional misregulation in cancers|MicroRNA…
XR_001839103.1	3.604496827	6.858680506	0.350313148	0.051075881	-4.29121401	0.035883756	1	Down	0.5204785	0.5995431	0.001123341	0.06655262	6.12E-21	0.001348238	Chr7	99593751	99608952	-	LOC102550763	NM_017136.2	977	antisense	intergenic	upstream	divergent	Sqle	GeneID:29230,Genbank:NM_017136.2,RGD:3755	squalene epoxidase	GO:0005789,GO:0006725,GO:0008203,GO:0010033,GO:0016021,GO:0016126,GO:0031090,GO:0043231,GO:0050660,GO:0055114,GO:0004506,GO:0005783	endoplasmic reticulum membrane|cellular aromatic compound metabolic process|cholesterol metabolic process|response to organic substance|integral component of membrane|sterol biosynthetic process|organelle membrane|intracellular membrane-bounded organelle|flavin adenine dinucleotide binding|oxidation-reduction process|squalene monooxygenase activity|endoplasmic reticulum	rno00100	Steroid biosynthesis
XR_001839107.1	91.46953876	11.26888186	171.6701957	15.23400438	3.929223311	0.001561492	0.322684177	Up	0.173563	0.2419743	0.1235604	2.111993	1.021883	4.518466	Chr7	118459981	118468104	-	LOC108351606	XM_017595388.1	4385	sense	intergenic	downstream	same_strand	LOC100910885	GeneID:100910885,Genbank:XM_017595388.1,RGD:6496055	apolipoprotein L3-like, transcript variant X1
XR_001839610.1	43.74077698	64.98742145	22.4941325	0.346130559	-1.530611777	0.026237056	1	Down	0.6621501	0.821601	0.6296473	0.2394172	0.4569815	1.02E-09	Chr8	125545408	125568140	+	LOC102550774	XM_017596200.1	0	antisense	genic	intronic	nested	Rbms3	GeneID:680726,Genbank:XM_017596200.1,RGD:1588240	RNA binding motif, single stranded interacting protein 3, transcript variant X2	GO:0008143,GO:0008266,GO:0010628,GO:0010629,GO:0035925,GO:0045727,GO:0090090,GO:0002357,GO:0003730,GO:0005737	poly(A) binding|poly(U) RNA binding|positive regulation of gene expression|negative regulation of gene expression|mRNA 3'-UTR AU-rich region binding|positive regulation of translation|negative regulation of canonical Wnt signaling pathway|defense response to tumor cell|mRNA 3'-UTR binding|cytoplasm
XR_001839825.1	25.72681224	8.031382104	43.42224237	5.406571597	2.434714045	0.04478256	1	Up	0.1021846	0.4333635	0.06141843	1.207988	0.1539925	1.569468	Chr9	65599666	65606597	+	LOC102550737	NM_022277.1	7545	sense	intergenic	upstream	same_strand	Casp8	GeneID:64044,Genbank:NM_022277.1,RGD:620945	caspase 8	GO:0005634,GO:0005654,GO:0005737,GO:0005829,GO:0009409,GO:0010996,GO:0005886,GO:0030225,GO:0006508,GO:0030690,GO:0031264,GO:0043065,GO:0031265,GO:0043123,GO:0043124,GO:0031625,GO:0044297,GO:0044877,GO:0045121,GO:0045471,GO:0001525,GO:0097190,GO:0045651,GO:0001841,GO:0097191,GO:0045862,GO:0004175,GO:0097194,GO:0046677,GO:0004197,GO:0005123,GO:0097199,GO:0005164,GO:0005515,GO:0097200,GO:0097202,GO:…	nucleus|nucleoplasm|cytoplasm|cytosol|response to cold|response to auditory stimulus|plasma membrane|macrophage differentiation|proteolysis|Noc1p-Noc2p complex|death-inducing signaling complex|positive regulation of apoptotic process|CD95 death-inducing signaling complex|positive regulation of I-kappaB kinase/NF-kappaB signaling|negative regulation of I-kappaB kinase/NF-kappaB signaling|ubiquitin…	rno04668,rno04210,rno04215,rno04217,rno04115,rno04620,rno04621,rno04622,rno04625,rno04657,rno05200,rno05203,rno05010,rno05016,rno05416,rno04932,rno05134,rno05152,rno05161,rno05168,rno05167,rno05165,rno05145,rno05142,rno01524	TNF signaling pathway|Apoptosis|Apoptosis - multiple species|Necroptosis|p53 signaling pathway|Toll-like receptor signaling pathway|NOD-like receptor signaling pathway|RIG-I-like receptor signaling pathway|C-type lectin receptor signaling pathway|IL-17 signaling pathway|Pathways in cancer|Viral carcinogenesis|Alzheimer's disease|Huntington's disease|Viral myocarditis|Non-alcoholic fatty liver dis…
XR_001839835.1	15.43899909	1.597074992	29.28092319	18.3340941	4.196457078	0.017099766	1	Up	0.07171861	0.0675278	0.03336604	1.041052	0.06665902	1.845925	Chr9	70965540	70973899	-	LOC108351944	XM_008767162.2	59479	antisense	intergenic	upstream	divergent	LOC100361090	GeneID:100361090,Genbank:XM_008767162.2,RGD:2320870	high mobility group protein HMG-I/HMG-Y-like
XR_001839910.1	3.279230078	6.558460156	0	0	#NAME?	0.017696161	1	Down	0.3139482	0.3014446	0.3419673	0	0	0	Chr9	105963858	105964727	+	LOC108351977
XR_001840129.1	61.03740574	85.97854098	36.09627051	0.419828833	-1.252126844	0.049375616	1	Down	0.4993297	0.2732435	0.2398829	0.1134626	0.2239025	0.06068467	Chr10	16938653	16964198	-	LOC102552476	NM_053769.3	6444	antisense	intergenic	upstream	divergent	Dusp1	GeneID:114856,Genbank:NM_053769.3,RGD:620897	dual specificity phosphatase 1	GO:0006470,GO:0008138,GO:0008330,GO:0009416,GO:0010033,GO:0043065,GO:0017017,GO:0043066,GO:0043407,GO:0043409,GO:0051384,GO:0051447,GO:0051591,GO:0051592,GO:0070373,GO:0000188,GO:0001706,GO:0004725,GO:0005634,GO:0005737,GO:0019838,GO:0032355,GO:0032526,GO:0032870,GO:0033574,GO:0035335,GO:0035556,GO:0071850,GO:0035970,GO:0090266,GO:0042542,GO:2000279,GO:0042981	protein dephosphorylation|protein tyrosine/serine/threonine phosphatase activity|protein tyrosine/threonine phosphatase activity|response to light stimulus|response to organic substance|positive regulation of apoptotic process|MAP kinase tyrosine/serine/threonine phosphatase activity|negative regulation of apoptotic process|negative regulation of MAP kinase activity|negative regulation of MAPK ca…	rno04010,rno04726,rno05418	MAPK signaling pathway|Serotonergic synapse|Fluid shear stress and atherosclerosis
XR_001840518.1	46.65986807	68.99228319	24.32745296	0.352611217	-1.503849725	0.024769368	1	Down	0.28958	0.5011535	0.2114079	0.1078909	0.1119155	0.1161628	Chr11	68687217	68713767	+	LOC102551038	NM_022600.1	0	antisense	genic	exonic	overlapping	Adcy5	GeneID:64532,Genbank:NM_022600.1,RGD:71014	adenylate cyclase 5	GO:0005886,GO:0005929,GO:0007195,GO:0006171,GO:0007204,GO:0007420,GO:0007507,GO:0019933,GO:0007568,GO:0042383,GO:0007626,GO:0043278,GO:0045111,GO:0045121,GO:0046872,GO:0001973,GO:0046982,GO:0004016,GO:0050885,GO:0004383,GO:0005524,GO:0005768,GO:0006182,GO:0007165,GO:0007189,GO:0008074,GO:0007191,GO:0008179,GO:0007193,GO:0008294,GO:0009190,GO:0010977,GO:0016020,GO:0016021,GO:0061178,GO:0097110,GO:…	plasma membrane|cilium|adenylate cyclase-inhibiting dopamine receptor signaling pathway|cAMP biosynthetic process|positive regulation of cytosolic calcium ion concentration|brain development|heart development|cAMP-mediated signaling|aging|sarcolemma|locomotory behavior|response to morphine|intermediate filament cytoskeleton|membrane raft|metal ion binding|adenosine receptor signaling pathway|prot…	rno00230,rno04015,rno04371,rno04072,rno04024,rno04022,rno04114,rno04540,rno04611,rno04062,rno04911,rno04923,rno04912,rno04913,rno04915,rno04914,rno04921,rno04926,rno04918,rno04916,rno04924,rno04925,rno04927,rno04261,rno04270,rno04970,rno04971,rno04972,rno04976,rno04724,rno04727,rno04725,rno04728,rno04726,rno04723,rno04750,rno04211,rno04213,rno04713,rno04714,rno05200,rno05012,rno05030,rno05031,rno…	Purine metabolism|Rap1 signaling pathway|Apelin signaling pathway|Phospholipase D signaling pathway|cAMP signaling pathway|cGMP - PKG signaling pathway|Oocyte meiosis|Gap junction|Platelet activation|Chemokine signaling pathway|Insulin secretion|Regulation of lipolysis in adipocyte|GnRH signaling pathway|Ovarian Steroidogenesis|Estrogen signaling pathway|Progesterone-mediated oocyte maturation|Ox…
XR_001841174.1	5.672704154	11.34540831	0	0	#NAME?	0.001061887	0.248313804	Down	0.1240135	0.0727416	0.09474076	9.28E-12	1.63E-07	0.000287031	Chr14	81085060	81091585	+	LOC102556834	XM_006251345.3	90	antisense	intergenic	downstream	convergent	Msantd1	GeneID:498394,Genbank:XM_006251345.3,RGD:1565796	Myb/SANT DNA binding domain containing 1, transcript variant X3	GO:0010468,GO:0016604	regulation of gene expression|nuclear body
XR_001841218.1	2.551985149	0	5.103970298	Inf	Inf	0.040619354	1	Up	7.94E-05	0.001851864	0.006091775	7.82E-29	0.1128261	0.1865152	Chr14	107543345	107558414	-	LOC102552091	NM_001107240.1	33922	sense	intergenic	downstream	same_strand	B3gnt2	GeneID:305571,Genbank:NM_001107240.1,RGD:1310077	UDP-GlcNAc:betaGal beta-1,3-N-acetylglucosaminyltransferase 2	GO:0016020,GO:0005783,GO:0016021,GO:0005794,GO:0016758,GO:0006486,GO:0006493,GO:0007411,GO:0007608,GO:0030311,GO:0008150,GO:0008375,GO:1990830,GO:0008376,GO:0008378,GO:0000139,GO:0008532,GO:0003674,GO:0005575	membrane|endoplasmic reticulum|integral component of membrane|Golgi apparatus|transferase activity, transferring hexosyl groups|protein glycosylation|protein O-linked glycosylation|axon guidance|sensory perception of smell|poly-N-acetyllactosamine biosynthetic process|biological_process|acetylglucosaminyltransferase activity|cellular response to leukemia inhibitory factor|acetylgalactosaminyltran…	rno00533,rno00601	Glycosaminoglycan biosynthesis - keratan sulfate|Glycosphingolipid biosynthesis - lacto and neolacto series
XR_001841324.1	6.575715546	13.15143109	0	0	#NAME?	0.023363036	1	Down	0.1346359	0.6471886	0.08304215	2.26E-15	2.33E-26	5.81E-05	Chr15	30884114	30886030	+	LOC108352917
XR_001841337.1	302.5481851	72.09781546	532.9985548	7.392714347	2.886104169	0.004780763	0.663779009	Up	1.228792	0.4496686	0.2636064	4.518263	1.487262	6.723245	Chr15	39662940	39667702	-	LOC108352929	NM_001108380.1	0	antisense	genic	exonic	overlapping	Rcbtb1	GeneID:361050,Genbank:NM_001108380.1,RGD:1308467	RCC1 and BTB domain containing protein 1	GO:0005737	cytoplasm
XR_001841338.1	28.04523935	4.117507577	51.97297113	12.62243485	3.657918326	0.00650307	0.82103749	Up	0.252801	0.2027919	0.07835443	1.448732	0.7407778	3.485295	Chr15	38656370	38684263	-	LOC102551046	XM_017599896.1	4517	sense	intergenic	upstream	same_strand	LOC108348241	GeneID:108348241,Genbank:XM_017599896.1	PHD finger protein 11-like
XR_001841389.1	29.4307579	10.55313795	48.30837785	4.577631606	2.194601364	0.048293063	1	Up	0.1042934	0.2781078	0.2102586	0.81614	0.2357793	1.604198	Chr15	58918716	58924497	-	LOC108352946
XR_001841711.1	7.159011297	0.320270363	13.99775223	43.70604914	5.449761065	0.012385732	1	Up	6.49E-05	0.01075472	0.001461709	0.04082757	0.3741194	0.1274056	Chr16	23558712	23573465	+	LOC103693922	XM_006253047.3	0	sense	genic	intronic	nested	Psd3	GeneID:306380,Genbank:XM_006253047.3,RGD:1559968	pleckstrin and Sec7 domain containing 3, transcript variant X12	GO:0032012,GO:0032154,GO:0032587,GO:0005086,GO:0005543,GO:0016020	regulation of ARF protein signal transduction|cleavage furrow|ruffle membrane|ARF guanyl-nucleotide exchange factor activity|phospholipid binding|membrane	rno04144	Endocytosis
XR_001841828.1	48.2339018	19.90599773	76.56180587	3.846167719	1.943421675	0.003886255	0.595401124	Up	0.06860545	0.1323355	0.1511556	0.4295268	0.2894426	0.5963805	Chr17	16747885	16790014	+	LOC102554492	NM_175582.1	52759	antisense	intergenic	upstream	divergent	Id4	GeneID:291023,Genbank:NM_175582.1,RGD:631428	inhibitor of DNA binding 4, HLH protein	GO:0005737,GO:0007405,GO:0007420,GO:0007623,GO:0008134,GO:0008283,GO:0045892,GO:0008284,GO:0045944,GO:0010628,GO:0046983,GO:0021766,GO:0048712,GO:0048715,GO:0051726,GO:0060512,GO:0060740,GO:0060741,GO:0061682,GO:0000082,GO:0000122,GO:0001085,GO:0001191,GO:0003700,GO:0005634,GO:0021895,GO:0022010,GO:0030182,GO:0034613,GO:0043392,GO:0045444,GO:0045599,GO:0045665,GO:0045669	cytoplasm|neuroblast proliferation|brain development|circadian rhythm|transcription factor binding|cell proliferation|negative regulation of transcription, DNA-templated|positive regulation of cell proliferation|positive regulation of transcription by RNA polymerase II|positive regulation of gene expression|protein dimerization activity|hippocampus development|negative regulation of astrocyte dif…	rno04350,rno04550	TGF-beta signaling pathway|Signaling pathways regulating pluripotency of stem cells
XR_001842044.1	10.84304781	17.84179194	3.844303669	0.215466231	-2.214466313	0.037311048	1	Down	0.1127202	0.1212595	0.09877194	0.009446541	0.05061742	0.01314582	Chr18	6653176	6692930	+	LOC102551724	XM_008771991.2	66038	antisense	intergenic	upstream	divergent	LOC103694169	GeneID:103694169,Genbank:XM_008771991.2,RGD:9258222	60S ribosomal protein L39	GO:0003723,GO:0003735,GO:0006412	RNA binding|structural constituent of ribosome|translation
XR_001842311.1	6.722678027	0.621813978	12.82354208	20.62279481	4.366167956	0.049897913	1	Up	0.004198843	0.00676981	0	0.05787742	0.01416464	0.1827102	Chr19	42209909	42227449	+	LOC108348933	NM_001014271.1	0	antisense	genic	intronic	nested	LOC367515	GeneID:367515,Genbank:NM_001014271.1,RGD:1359286	similar to RIKEN cDNA 1700081O22
XR_001842563.1	36.14046043	9.996354057	62.2845668	6.230728368	2.639400823	0.030548468	1	Up	0.5203965	1.310067	0.4612265	5.031194	0.8397785	7.573303	Chr20	5488669	5489594	-	LOC108349036	XM_006256108.3	2707	sense	intergenic	upstream	same_strand	Daxx	GeneID:140926,Genbank:XM_006256108.3,RGD:621227	death-domain associated protein, transcript variant X2	GO:0002039,GO:0003713,GO:0003714,GO:0005515,GO:0006351,GO:0005634,GO:0006355,GO:0008134,GO:0008432,GO:0010038,GO:0030521,GO:0010832,GO:0016604,GO:0030578,GO:0016605,GO:0031396,GO:0031625,GO:0000122,GO:0042393,GO:0000281,GO:0042803,GO:0032147,GO:0000775,GO:0032183,GO:0043005,GO:0000792,GO:0043065,GO:0043066,GO:0001741,GO:0044297,GO:0001934,GO:0071276,GO:0045860,GO:0045892,GO:0071280,GO:0071356,GO:…	p53 binding|transcription coactivator activity|transcription corepressor activity|protein binding|transcription, DNA-templated|nucleus|regulation of transcription, DNA-templated|transcription factor binding|JUN kinase binding|response to metal ion|androgen receptor signaling pathway|negative regulation of myotube differentiation|nuclear body|PML body organization|PML body|regulation of protein ub…	rno04010,rno04210,rno05014,rno05168	MAPK signaling pathway|Apoptosis|Amyotrophic lateral sclerosis (ALS)|Herpes simplex infection
XR_001842737.1	7.512578475	14.71296823	0.312188723	0.021218609	-5.558526096	0.00067547	0.193620297	Down	0.1076489	0.05859752	0.01721735	0.000872753	0.00429896	0.001430092	ChrX	80441025	80467510	+	LOC102554698	NM_001109439.1	77857	sense	intergenic	downstream	same_strand	LOC681325	GeneID:681325,Genbank:NM_001109439.1,RGD:1596765	hypothetical protein LOC681325
XR_001842749.1	17.15805269	26.82705094	7.489054448	0.279160556	-1.840832986	0.03061959	1	Down	2.100525	1.480912	1.516999	0.8175273	9.13E-16	0.4877209	ChrX	107664693	107688918	-	LOC108349241	NM_001271176.1	6573	antisense	intergenic	upstream	divergent	Fam199x	GeneID:679168,Genbank:NM_001271176.1,RGD:1591830	family with sequence similarity 199, X-linked
XR_145794.4	211.0897123	28.18333558	393.9960891	13.97975368	3.805267035	0.014636567	1	Up	1.383418	0.9071905	0.7055484	11.40624	2.313263	24.9933	Chr1	227093975	227108899	-	LOC100911030	XM_017590480.1	22490	sense	intergenic	upstream	same_strand	Ms4a18	GeneID:100359485,Genbank:XM_017590480.1,RGD:2323808	membrane spanning 4-domains A18	GO:0016021	integral component of membrane
XR_349835.3	9.966373859	1.281081453	18.65166627	14.55931333	3.863870409	0.018692502	1	Up	4.42E-14	0.1002406	1.31E-22	0.09269247	0.4890276	0.9719223	Chr1	12585889	12594968	+	LOC102546604	NM_001170534.2	0	sense	genic	intronic	nested	Mcc	GeneID:307449,Genbank:NM_001170534.2,RGD:1561988	mutated in colorectal cancers	GO:0005737,GO:0005829,GO:0005886,GO:0010633,GO:0045184,GO:0050680,GO:0090090,GO:0005509,GO:0005634,GO:0005654	cytoplasm|cytosol|plasma membrane|negative regulation of epithelial cell migration|establishment of protein localization|negative regulation of epithelial cell proliferation|negative regulation of canonical Wnt signaling pathway|calcium ion binding|nucleus|nucleoplasm
XR_353861.3	6.583297625	0	13.16659525	Inf	Inf	0.017601805	1	Up	2.74E-05	8.40E-05	0.004667927	0.236473	0.1250642	6.71E-06	Chr5	21705806	21716612	+	LOC102551372	XM_017593615.1	9085	sense	intergenic	downstream	same_strand	Rab2a	GeneID:65158,Genbank:XM_017593615.1,RGD:68323	RAB2A, member RAS oncogene family, transcript variant X1	GO:0032482,GO:0007030,GO:0003924,GO:0033116,GO:0042470,GO:0012505,GO:0043025,GO:0005525,GO:0015031,GO:0005789,GO:0048471,GO:0016020,GO:0005794,GO:0019003,GO:0000139,GO:0006886,GO:0006888	Rab protein signal transduction|Golgi organization|GTPase activity|endoplasmic reticulum-Golgi intermediate compartment membrane|melanosome|endomembrane system|neuronal cell body|GTP binding|protein transport|endoplasmic reticulum membrane|perinuclear region of cytoplasm|membrane|Golgi apparatus|GDP binding|Golgi membrane|intracellular protein transport|ER to Golgi vesicle-mediated transport	rno04152	AMPK signaling pathway
XR_353862.3	2.920844585	5.841689171	0	0	#NAME?	0.034600694	1	Down	0.1279285	0.05276764	0.000347117	0.001652891	0.001070101	6.12E-06	Chr5	21705805	21716612	+	LOC102551372	XM_017593615.1	9084	sense	intergenic	downstream	same_strand	Rab2a	GeneID:65158,Genbank:XM_017593615.1,RGD:68323	RAB2A, member RAS oncogene family, transcript variant X1	GO:0032482,GO:0007030,GO:0003924,GO:0033116,GO:0042470,GO:0012505,GO:0043025,GO:0005525,GO:0015031,GO:0005789,GO:0048471,GO:0016020,GO:0005794,GO:0019003,GO:0000139,GO:0006886,GO:0006888	Rab protein signal transduction|Golgi organization|GTPase activity|endoplasmic reticulum-Golgi intermediate compartment membrane|melanosome|endomembrane system|neuronal cell body|GTP binding|protein transport|endoplasmic reticulum membrane|perinuclear region of cytoplasm|membrane|Golgi apparatus|GDP binding|Golgi membrane|intracellular protein transport|ER to Golgi vesicle-mediated transport	rno04152	AMPK signaling pathway
XR_358814.3	6.306571578	10.92693119	1.686211964	0.154317066	-2.696030474	0.048110991	1	Down	0.0618132	0.02643208	0.08801046	0.01227381	0.006454401	0.006490692	Chr13	13311809	13331500	-	LOC100911239
XR_359427.1	3.478957168	6.957914337	0	0	#NAME?	0.025716938	1	Down	1.42E-06	1.151434	0.5936162	1.29E-07	3.63E-13	0.01078401	Chr14	18844872	18845853	+	LOC102549742	NM_001007729.1	2696	antisense	intergenic	downstream	convergent	Pf4	GeneID:360918,Genbank:NM_001007729.1,RGD:3305	platelet factor 4	GO:0008201,GO:0010469,GO:0010628,GO:0010744,GO:0016525,GO:0032760,GO:0032991,GO:0019221,GO:0042127,GO:0042832,GO:0043950,GO:0065003,GO:0070098,GO:0045236,GO:0090023,GO:0045347,GO:0097679,GO:2001240,GO:0002690,GO:0003674,GO:0005615,GO:0005737,GO:0006954,GO:0006955,GO:0007186,GO:0008009,GO:0020005,GO:0030168,GO:0030595,GO:0030816,GO:0045651,GO:0031091,GO:0045653,GO:0031982,GO:0032496,GO:0045918,GO:…	heparin binding|regulation of signaling receptor activity|positive regulation of gene expression|positive regulation of macrophage derived foam cell differentiation|negative regulation of angiogenesis|positive regulation of tumor necrosis factor production|protein-containing complex|cytokine-mediated signaling pathway|regulation of cell proliferation|defense response to protozoan|positive regulat…	rno04060,rno04062	Cytokine-cytokine receptor interaction|Chemokine signaling pathway
XR_359722.3	12.08060008	19.70885333	4.452346836	0.22590593	-2.146205955	0.035200111	1	Down	0.1950814	0.08338484	0.1351148	0.005874964	0.05848707	0.02583374	Chr14	104709528	104715761	+	LOC102547925	XM_006251526.3	70888	sense	intergenic	upstream	same_strand	Sertad2	GeneID:498423,Genbank:XM_006251526.3,RGD:1564049	SERTA domain containing 2, transcript variant X1	GO:0005654,GO:0005737,GO:0005829,GO:0030308,GO:0045893,GO:0003713,GO:0005634	nucleoplasm|cytoplasm|cytosol|negative regulation of cell growth|positive regulation of transcription, DNA-templated|transcription coactivator activity|nucleus
XR_359962.3	67.87023376	4.804055447	130.9364121	27.25539151	4.768469739	0.030274967	1	Up	2.77E-15	1.023166	2.22E-16	6.989487	1.99E-16	19.22818	Chr15	39672140	39673979	-	LOC102552532	XM_017599892.1	0	sense	genic	intronic	nested	Setdb2	GeneID:100361710,Genbank:XM_017599892.1,RGD:2319564	SET domain, bifurcated 2, transcript variant X9	GO:0005654,GO:0005694,GO:0005829,GO:0007059,GO:0008270,GO:0046872,GO:0046974,GO:0051567,GO:0000278,GO:0003677,GO:0005634	nucleoplasm|chromosome|cytosol|chromosome segregation|zinc ion binding|metal ion binding|histone methyltransferase activity (H3-K9 specific)|histone H3-K9 methylation|mitotic cell cycle|DNA binding|nucleus	rno00310	Lysine degradation
XR_361445.3	23.5373951	35.10438879	11.97040141	0.34099444	-1.552179877	0.046655315	1	Down	1.112239	0.511564	0.3487666	0.08311377	0.1842973	0.3526923	Chr18	62227431	62234562	+	LOC102551356	XM_017601010.1	47796	sense	intergenic	downstream	same_strand	Pmaip1	GeneID:492821,Genbank:XM_017601010.1,RGD:1359266	phorbol-12-myristate-13-acetate-induced protein 1, transcript variant X1	GO:0006919,GO:0006974,GO:0008630,GO:0009411,GO:0010165,GO:0010498,GO:0010907,GO:0051607,GO:0010917,GO:0070059,GO:0032461,GO:0071456,GO:0042149,GO:0072332,GO:0072593,GO:0090200,GO:0097193,GO:1900740,GO:1902043,GO:2001244,GO:0001836,GO:0003674,GO:0005634,GO:0005739,GO:0005829,GO:0006915,GO:0042771,GO:0043029,GO:0043065,GO:0043280,GO:0043331,GO:0043517,GO:0043525,GO:0046902,GO:0048147	activation of cysteine-type endopeptidase activity involved in apoptotic process|cellular response to DNA damage stimulus|intrinsic apoptotic signaling pathway in response to DNA damage|response to UV|response to X-ray|proteasomal protein catabolic process|positive regulation of glucose metabolic process|defense response to virus|negative regulation of mitochondrial membrane potential|intrinsic a…	rno04210,rno04215,rno04115,rno05200,rno05203,rno05210,rno01524	Apoptosis|Apoptosis - multiple species|p53 signaling pathway|Pathways in cancer|Viral carcinogenesis|Colorectal cancer|Platinum drug resistance
XR_590363.2	8.624314391	1.32870805	15.91992073	11.98150394	3.582737103	0.012443881	1	Up	0.02279837	0.02552538	0.04121916	0.07141592	0.6715481	0.414512	Chr1	143349121	143361938	+	LOC102556224	XM_006229440.3	2929	antisense	intergenic	downstream	convergent	Fsd2	GeneID:308779,Genbank:XM_006229440.3,RGD:1305167	fibronectin type III and SPRY domain containing 2, transcript variant X1
XR_590452.1	2.697184436	0	5.394368873	Inf	Inf	0.033348493	1	Up	0	0	0	0	1.089397	1.055845	Chr1	191827171	191829514	-	LOC102549682	XM_008759685.2	33	antisense	intergenic	upstream	divergent	Scnn1b	GeneID:24767,Genbank:XM_008759685.2,RGD:3640	sodium channel epithelial 1 beta subunit, transcript variant X4	GO:0006814,GO:0009897,GO:0009986,GO:0015280,GO:0050699,GO:0016020,GO:0050891,GO:0050909,GO:0055078,GO:0001666,GO:0002028,GO:0005272,GO:0005515,GO:0005887,GO:0016021,GO:0016324,GO:0030659,GO:0034706,GO:0035313,GO:0070062,GO:0035725	sodium ion transport|external side of plasma membrane|cell surface|ligand-gated sodium channel activity|WW domain binding|membrane|multicellular organismal water homeostasis|sensory perception of taste|sodium ion homeostasis|response to hypoxia|regulation of sodium ion transport|sodium channel activity|protein binding|integral component of plasma membrane|integral component of membrane|apical pla…	rno04960,rno04742	Aldosterone-regulated sodium reabsorption|Taste transduction
XR_590794.2	15.06134958	6.218139779	23.90455939	3.844326476	1.942730861	0.041340783	1	Up	0.1568779	0.1465529	6.48E-06	0.4560547	0.3750427	0.1713826	Chr2	5635240	5698528	+	LOC102549789	XM_008760627.2	1365	sense	intergenic	downstream	same_strand	LOC684998	GeneID:684998,Genbank:XM_008760627.2,RGD:1584363	hypothetical protein LOC684998, transcript variant X1
XR_590817.2	57.18441289	32.99888739	81.36993838	2.465838846	1.302078516	0.045841348	1	Up	0.5485407	0.4136939	0.4098085	0.9694487	0.6705336	1.543565	Chr2	20580076	20582987	+	LOC103691419	XM_008760647.2	0	sense	genic	intronic	nested	Ssbp2	GeneID:361877,Genbank:XM_008760647.2,RGD:1562968	single-stranded DNA binding protein 2, transcript variant X2	GO:0005634,GO:0005737,GO:0006366,GO:0045944,GO:0000978,GO:0001077,GO:0003697	nucleus|cytoplasm|transcription by RNA polymerase II|positive regulation of transcription by RNA polymerase II|RNA polymerase II proximal promoter sequence-specific DNA binding|transcriptional activator activity, RNA polymerase II proximal promoter sequence-specific DNA binding|single-stranded DNA binding
XR_590927.2	8.474291206	1.507718074	15.44086434	10.24121459	3.356314922	0.008770545	0.986519762	Up	0.1243161	0	5.04E-06	0.2532866	0.1978682	0.5391746	Chr2	52825390	52830420	+	LOC103691468
XR_591364.1	2.975827547	0	5.951655094	Inf	Inf	0.047701778	1	Up	0.000455626	0.002593804	0.000517079	0.03580907	3.81E-09	0.09516408	Chr2	243323755	243332027	+	LOC102555623	XM_017591352.1	678	sense	intergenic	upstream	same_strand	LOC102555814	GeneID:102555814,Genbank:XM_017591352.1,RGD:7695964	uncharacterized LOC102555814, transcript variant X2
XR_591875.2	3.739341931	7.128370713	0.350313148	0.049143509	-4.346855323	0.033616782	1	Down	0.4068306	0.3564827	0.3500294	0.02816872	0.002725221	2.99E-08	Chr3	166460118	166470446	-	LOC103691977	XM_006235659.3	0	antisense	genic	exonic	overlapping	Tshz2	GeneID:100911757,Genbank:XM_006235659.3,RGD:6490867	teashirt zinc finger homeobox 2	GO:0006357,GO:0007275,GO:0010468,GO:0001078,GO:0003682,GO:0005634	regulation of transcription by RNA polymerase II|multicellular organism development|regulation of gene expression|transcriptional repressor activity, RNA polymerase II proximal promoter sequence-specific DNA binding|chromatin binding|nucleus
XR_592045.2	41.23678773	60.9504318	21.52314366	0.353125368	-1.501747629	0.046126149	1	Down	0.958282	2.152837	0.9471231	0.6459934	0.685146	0.01985355	Chr4	44424977	44572511	-	LOC102550644	NM_131914.2	753	antisense	intergenic	upstream	divergent	Cav2	GeneID:363425,Genbank:NM_131914.2,RGD:620348	caveolin 2	GO:0048741,GO:0050731,GO:0051219,GO:0051259,GO:0002080,GO:0060161,GO:0005198,GO:0005515,GO:0005622,GO:0070836,GO:0005635,GO:0005637,GO:0005901,GO:0005737,GO:0005783,GO:0005925,GO:0008285,GO:0006869,GO:0008286,GO:0006906,GO:0009986,GO:0016020,GO:0000139,GO:0030674,GO:0016050,GO:0000149,GO:0031234,GO:0019065,GO:0001937,GO:0031410,GO:0031435,GO:0001938,GO:0043410,GO:0031748,GO:0043547,GO:0032947,GO:…	skeletal muscle fiber development|positive regulation of peptidyl-tyrosine phosphorylation|phosphoprotein binding|protein complex oligomerization|acrosomal membrane|positive regulation of dopamine receptor signaling pathway|structural molecule activity|protein binding|intracellular|caveola assembly|nuclear envelope|nuclear inner membrane|caveola|cytoplasm|endoplasmic reticulum|focal adhesion|nega…	rno04144,rno04510,rno05205,rno05418,rno05100	Endocytosis|Focal adhesion|Proteoglycans in cancer|Fluid shear stress and atherosclerosis|Bacterial invasion of epithelial cells
XR_592751.2	7.498356879	13.70983444	1.286879316	0.093865416	-3.413262481	0.010899817	1	Down	0.2704104	0.40612	0.3173465	0.02186819	0.0622288	0.006144569	Chr5	154895300	154898934	-	LOC103692495	NM_030830.2	0	antisense	genic	exonic	nested	Luzp1	GeneID:79428,Genbank:NM_030830.2,RGD:61839	leucine zipper protein 1	GO:0005634,GO:0021503,GO:0060840,GO:0003281	nucleus|neural fold bending|artery development|ventricular septum development
XR_593303.1	19.89362419	32.31824663	7.469001746	0.231107889	-2.113361589	0.011728225	1	Down	1.125238	0.8901661	0.3519976	0.1584499	0.3084478	0.05563081	Chr7	20382314	20384820	-	LOC102552467	XM_017595188.1	0	antisense	genic	intronic	nested	RGD1564409	GeneID:314670,Genbank:XM_017595188.1,RGD:1564409	similar to hypothetical protein 4930509O22, transcript variant X1
XR_593347.2	15.66455039	27.04188417	4.287216613	0.158539863	-2.65708246	0.010798953	1	Down	0.3087835	0.0934997	0.3748629	0.03660481	0.02236751	0.06130291	Chr7	23321132	23329214	+	LOC103692811	NM_017109.1	74682	sense	intergenic	upstream	same_strand	Syn3	GeneID:29130,Genbank:NM_017109.1,RGD:3799	synapsin III	GO:0007269,GO:0008021,GO:0014069,GO:0030054,GO:0030672,GO:0045202,GO:0005515,GO:0005524	neurotransmitter secretion|synaptic vesicle|postsynaptic density|cell junction|synaptic vesicle membrane|synapse|protein binding|ATP binding
XR_593492.2	8.733866112	16.41679278	1.050939445	0.064016124	-3.965420858	0.026234206	1	Down	1.928527	3.87E-14	1.119494	0.1853782	0.01992722	1.03E-12	Chr7	75744800	75745685	+	LOC100910524	NM_001126087.1	57625	antisense	intergenic	downstream	convergent	Zfp706	GeneID:500855,Genbank:NM_001126087.1,RGD:1563959	zinc finger protein 706	GO:0005737,GO:0008150,GO:0045892,GO:1902455,GO:0003674,GO:0005575,GO:0005634	cytoplasm|biological_process|negative regulation of transcription, DNA-templated|negative regulation of stem cell population maintenance|molecular_function|cellular_component|nucleus
XR_593920.2	2.594010893	5.188021786	0	0	#NAME?	0.040910071	1	Down	1.899448	0	1.442135	0	0	0	Chr8	58741873	58745420	+	LOC103693097	NM_017085.2	0	antisense	genic	exonic	overlapping	Cyp19a1	GeneID:25147,Genbank:NM_017085.2,RGD:2457	cytochrome P450, family 19, subfamily a, polypeptide 1	GO:0006703,GO:0006710,GO:0008021,GO:0008206,GO:0008207,GO:0008209,GO:0016712,GO:0018879,GO:0008584,GO:0018894,GO:0008585,GO:0018963,GO:0020037,GO:0021766,GO:0043197,GO:0021854,GO:0043278,GO:0030186,GO:0043627,GO:0030325,GO:0043679,GO:0044344,GO:0045202,GO:0045779,GO:0001553,GO:0071371,GO:0050803,GO:0002677,GO:0071372,GO:0055114,GO:0071464,GO:0060065,GO:0005506,GO:0097720,GO:0005737,GO:2000866,GO:…	estrogen biosynthetic process|androgen catabolic process|synaptic vesicle|bile acid metabolic process|C21-steroid hormone metabolic process|androgen metabolic process|oxidoreductase activity, acting on paired donors, with incorporation or reduction of molecular oxygen, reduced flavin or flavoprotein as one donor, and incorporation of one atom of oxygen|biphenyl metabolic process|male gonad develo…	rno00140,rno04913	Steroid hormone biosynthesis|Ovarian Steroidogenesis
XR_594354.2	7.345271484	1.008437687	13.68210528	13.5676259	3.762096391	0.038226213	1	Up	0.01929468	0	0.03536978	0.2729357	0.002594351	0.4483295	Chr9	46890271	46937373	+	LOC103690523	XM_008766983.2	9030	sense	intergenic	downstream	same_strand	Il1r2	GeneID:117022,Genbank:XM_008766983.2,RGD:621147	interleukin 1 receptor type 2, transcript variant X1	GO:2000660,GO:0005737,GO:0005886,GO:0010955,GO:0016021,GO:0019221,GO:0019966,GO:0050712,GO:0004908,GO:1900016,GO:0004910,GO:0005576	negative regulation of interleukin-1-mediated signaling pathway|cytoplasm|plasma membrane|negative regulation of protein processing|integral component of membrane|cytokine-mediated signaling pathway|interleukin-1 binding|negative regulation of interleukin-1 alpha secretion|interleukin-1 receptor activity|negative regulation of cytokine production involved in inflammatory response|interleukin-1, T…	rno04060,rno04640,rno05202,rno05215,rno05418,rno05166,rno05146	Cytokine-cytokine receptor interaction|Hematopoietic cell lineage|Transcriptional misregulation in cancers|Prostate cancer|Fluid shear stress and atherosclerosis|HTLV-I infection|Amoebiasis
XR_594576.2	10.10999003	0	20.21998006	Inf	Inf	1.26E-05	0.013955308	Up	1.92E-09	0.00132778	1.39E-22	1.044275	0.5838143	1.098792	Chr10	6889267	6892561	+	LOC102546403	NM_001106972.1	19256	antisense	intergenic	upstream	divergent	RGD1309748	GeneID:302913,Genbank:NM_001106972.1,RGD:1309748	similar to CG4768-PA
XR_594631.2	2.986388205	5.97277641	0	0	#NAME?	0.042669649	1	Down	0.05325206	0.1082285	2.77E-14	2.45E-11	3.08E-05	5.26E-11	Chr10	16938653	16964185	-	LOC102552476	NM_053769.3	6457	antisense	intergenic	upstream	divergent	Dusp1	GeneID:114856,Genbank:NM_053769.3,RGD:620897	dual specificity phosphatase 1	GO:0006470,GO:0008138,GO:0008330,GO:0009416,GO:0010033,GO:0043065,GO:0017017,GO:0043066,GO:0043407,GO:0043409,GO:0051384,GO:0051447,GO:0051591,GO:0051592,GO:0070373,GO:0000188,GO:0001706,GO:0004725,GO:0005634,GO:0005737,GO:0019838,GO:0032355,GO:0032526,GO:0032870,GO:0033574,GO:0035335,GO:0035556,GO:0071850,GO:0035970,GO:0090266,GO:0042542,GO:2000279,GO:0042981	protein dephosphorylation|protein tyrosine/serine/threonine phosphatase activity|protein tyrosine/threonine phosphatase activity|response to light stimulus|response to organic substance|positive regulation of apoptotic process|MAP kinase tyrosine/serine/threonine phosphatase activity|negative regulation of apoptotic process|negative regulation of MAP kinase activity|negative regulation of MAPK ca…	rno04010,rno04726,rno05418	MAPK signaling pathway|Serotonergic synapse|Fluid shear stress and atherosclerosis
XR_594688.1	9.950045305	19.90009061	0	0	#NAME?	0.03017087	1	Down	0.4954954	0.2208229	2.37441	0.002396883	1.01E-05	0.005548174	Chr10	39182291	39193392	-	LOC102550895	NM_019269.1	7709	sense	intergenic	downstream	same_strand	Slc22a5	GeneID:29726,Genbank:NM_019269.1,RGD:3702	solute carrier family 22 member 5	GO:0007626,GO:0008514,GO:0009437,GO:0015226,GO:0015697,GO:0015711,GO:0015879,GO:0016021,GO:0048608,GO:0052106,GO:0016323,GO:0055085,GO:0060731,GO:0005452,GO:0005515,GO:0070715,GO:0005524,GO:0005887,GO:0006814,GO:0007005,GO:0007512,GO:0015293,GO:0015347,GO:0015491,GO:0015651,GO:0016324,GO:0015695,GO:0022857,GO:0030165,GO:0031526,GO:1902603,GO:0042891,GO:0042895,GO:0043252	locomotory behavior|organic anion transmembrane transporter activity|carnitine metabolic process|carnitine transmembrane transporter activity|quaternary ammonium group transport|organic anion transport|carnitine transport|integral component of membrane|reproductive structure development|quorum sensing involved in interaction with host|basolateral plasma membrane|transmembrane transport|positive r…	rno05231	Choline metabolism in cancer
XR_594934.1	12.97434504	1.243627956	24.70506212	19.86531583	4.312179825	0.030795859	1	Up	0.1084258	0.09933987	0	0.7466507	0.1472762	2.16552	Chr10	103724133	103725505	-	LOC103693478	NM_021594.1	0	antisense	genic	intronic	nested	Slc9a3r1	GeneID:59114,Genbank:NM_021594.1,RGD:708538	SLC9A3 regulator 1	GO:0007191,GO:0007605,GO:0008013,GO:0008285,GO:0008360,GO:0008361,GO:0010642,GO:0019904,GO:0019933,GO:0010766,GO:0022612,GO:0012505,GO:0030033,GO:0030036,GO:0030165,GO:0034635,GO:0030175,GO:0030336,GO:0043621,GO:0030643,GO:0044062,GO:0044877,GO:0045121,GO:0045159,GO:0001726,GO:0070293,GO:0045177,GO:0003096,GO:0070373,GO:0045198,GO:0005102,GO:0070851,GO:0045859,GO:0005515,GO:0071944,GO:0005634,GO:…	adenylate cyclase-activating dopamine receptor signaling pathway|sensory perception of sound|beta-catenin binding|negative regulation of cell proliferation|regulation of cell shape|regulation of cell size|negative regulation of platelet-derived growth factor receptor signaling pathway|protein domain specific binding|cAMP-mediated signaling|negative regulation of sodium ion transport|gland morphog…	rno04530,rno05165	Tight junction|Human papillomavirus infection
XR_595100.2	16.59208367	29.52132816	3.662839168	0.124074335	-3.01072337	0.001522829	0.322187093	Down	0.539361	1.46504	1.437684	0.1292265	4.19E-10	0.2714097	Chr11	71483306	71489573	+	LOC102547162	XM_008768710.2	773	antisense	intergenic	downstream	convergent	Zdhhc19	GeneID:288045,Genbank:XM_008768710.2,RGD:1309014	zinc finger, DHHC-type containing 19, transcript variant X1	GO:0006612,GO:0016021,GO:0018230,GO:0019706,GO:0005783,GO:0005794	protein targeting to membrane|integral component of membrane|peptidyl-L-cysteine S-palmitoylation|protein-cysteine S-palmitoyltransferase activity|endoplasmic reticulum|Golgi apparatus
XR_595536.2	49.82415333	74.01043013	25.63787653	0.346408965	-1.529451826	0.022837311	1	Down	1.199542	1.094938	0.8910907	0.2127153	0.4322004	0.4060054	Chr13	84533278	84536246	+	LOC103693676	XM_008769715.1	931	sense	intergenic	downstream	same_strand	Ildr2	GeneID:685277,Genbank:XM_008769715.1,RGD:1596420	immunoglobulin-like domain containing receptor 2, transcript variant X3	GO:0030154,GO:0031016,GO:0048873,GO:0009749,GO:0016021,GO:0030073	cell differentiation|pancreas development|homeostasis of number of cells within a tissue|response to glucose|integral component of membrane|insulin secretion
XR_595708.2	322.2034888	144.9095677	499.49741	3.446959493	1.785324345	0.002371492	0.415336683	Up	2.985696	3.051147	3.185381	12.68225	5.868573	11.22976	Chr14	5758741	5761039	-	LOC102556623	XM_017599162.1	0	antisense	genic	intronic	nested	Abcg3l3	GeneID:305142,Genbank:XM_017599162.1,RGD:1564709	ATP-binding cassette, subfamily G (WHITE), member 3-like 3, transcript variant X1	GO:0016021,GO:0016324,GO:0017127,GO:0033344,GO:0042626,GO:0043235,GO:0055085,GO:0005524,GO:0005886,GO:0006855	integral component of membrane|apical plasma membrane|cholesterol transporter activity|cholesterol efflux|ATPase activity, coupled to transmembrane movement of substances|receptor complex|transmembrane transport|ATP binding|plasma membrane|drug transmembrane transport
XR_596430.1	76.25517082	12.72041969	139.7899219	10.98941115	3.458042178	5.31E-07	0.000942924	Up	0.6697221	0.4434492	0.2812299	3.818132	3.449914	6.889242	Chr16	29960315	29962853	+	LOC103693929	XM_017600406.1	24095	antisense	intergenic	upstream	divergent	Ddx60	GeneID:100360801,Genbank:XM_017600406.1,RGD:1560014	DEXD/H-box helicase 60, transcript variant X1
XR_596479.2	16.1128865	6.15768271	26.0680903	4.233425385	2.081825461	0.026076713	1	Up	0.5055383	0.1216391	0.03198292	0.983825	1.089688	0.3139854	Chr16	53975409	53998370	-	LOC102547443	NM_001290133.1	0	antisense	genic	intronic	overlapping	Frg1	GeneID:686103,Genbank:NM_001290133.1,RGD:1585495	FSHD region gene 1	GO:0071013,GO:0005730,GO:0051015,GO:0055120	catalytic step 2 spliceosome|nucleolus|actin filament binding|striated muscle dense body
XR_596655.2	121.6506299	62.32734798	180.9739118	2.903603597	1.537844509	0.009618538	1	Up	0.322297	0.2859915	0.2806101	0.602352	0.6459315	1.209865	Chr17	16747885	16779442	+	LOC102554492	NM_175582.1	52759	antisense	intergenic	upstream	divergent	Id4	GeneID:291023,Genbank:NM_175582.1,RGD:631428	inhibitor of DNA binding 4, HLH protein	GO:0005737,GO:0007405,GO:0007420,GO:0007623,GO:0008134,GO:0008283,GO:0045892,GO:0008284,GO:0045944,GO:0010628,GO:0046983,GO:0021766,GO:0048712,GO:0048715,GO:0051726,GO:0060512,GO:0060740,GO:0060741,GO:0061682,GO:0000082,GO:0000122,GO:0001085,GO:0001191,GO:0003700,GO:0005634,GO:0021895,GO:0022010,GO:0030182,GO:0034613,GO:0043392,GO:0045444,GO:0045599,GO:0045665,GO:0045669	cytoplasm|neuroblast proliferation|brain development|circadian rhythm|transcription factor binding|cell proliferation|negative regulation of transcription, DNA-templated|positive regulation of cell proliferation|positive regulation of transcription by RNA polymerase II|positive regulation of gene expression|protein dimerization activity|hippocampus development|negative regulation of astrocyte dif…	rno04350,rno04550	TGF-beta signaling pathway|Signaling pathways regulating pluripotency of stem cells
XR_596864.2	60.30395883	30.6328418	89.97507585	2.937209562	1.554446202	0.016521451	1	Up	0.53031	0.4841429	0.3521613	0.9569655	1.110217	1.726631	Chr17	79722995	79728069	+	LOC103694135	XM_017600495.1	0	antisense	genic	intronic	nested	Fam188a	GeneID:291320,Genbank:XM_017600495.1,RGD:1309605	family with sequence similarity 188, member A, transcript variant X1	GO:0031965,GO:0071108,GO:1990380,GO:0005654,GO:0016807	nuclear membrane|protein K48-linked deubiquitination|Lys48-specific deubiquitinase activity|nucleoplasm|cysteine-type carboxypeptidase activity
XR_597351.2	42.40988202	19.39153652	65.42822751	3.37406102	1.754486065	0.033788348	1	Up	0.1824947	0.1177508	0.06888758	0.4193174	0.1451386	0.5834408	Chr20	10235419	10242744	+	LOC103694394	NM_001135667.1	0	antisense	genic	exonic	overlapping	Wdr4	GeneID:690032,Genbank:NM_001135667.1,RGD:1585179	WD repeat domain 4	GO:0005829,GO:0006400,GO:0008176,GO:0043527,GO:0106004,GO:0005634	cytosol|tRNA modification|tRNA (guanine-N7-)-methyltransferase activity|tRNA methyltransferase complex|tRNA (guanine-N7)-methylation|nucleus
XR_597429.2	2.763509449	5.527018897	0	0	#NAME?	0.033130147	1	Down	0.04125126	0.009220577	0.03202931	0.001271933	0.000972989	5.26E-12	Chr20	40327611	40355111	-	LOC102553345	XM_017601625.1	0	antisense	genic	intronic	nested	Hs3st5	GeneID:294449,Genbank:XM_017601625.1,RGD:1306379	heparan sulfate-glucosamine 3-sulfotransferase 5, transcript variant X3	GO:0046596,GO:0050819,GO:0006477,GO:0008467,GO:0015015	regulation of viral entry into host cell|negative regulation of coagulation|protein sulfation|[heparan sulfate]-glucosamine 3-sulfotransferase 1 activity|heparan sulfate proteoglycan biosynthetic process, enzymatic modification	rno00534	Glycosaminoglycan biosynthesis - heparan sulfate / heparin
