# Supplementary material for: Comprehensive Analysis of the Profiles of Differentially Expressed mRNAs, lncRNAs, and circRNAs in Phosgene-Induced Acute Lung Injury
Source: Biomed Res Int. 2021 Jan 9;2021:6278526. doi: 10.1155/2021/6278526 (PMC7811572; doi:10.1155/2021/6278526)
Supplement: Supplementary 3 — Table S3: differentially expressed circRNAs between the A and B group. [file 6278526.f3.txt]

Table S3 Differentially expressed circRNAs between A and B group
circRNA_id	BaseMean	BaseMean_control_A	BaseMean_case_B	FoldChange	log2FoldChange	pValue	qValue	Regulation	Expression_A1	Expression_A2	Expression_A3	Expression_B1	Expression_B2	Expression_B3	circRNA_Chr	circRNA_Strand	circRNA_Start	circRNA_End	genomic_length	circRNA_length	Type	best.transcript	transcript_position	gene	Dbxref	product	GO_id	GO_term	pathway	pathway_description
circRNA_0212|Chr1:104785950_104795565_+	1.729285358	0	3.458570716	Inf	Inf	0.042744453	1	Up	0	0	0	0.042040898	0.041383033	0.030881648	Chr1	+	104785950	104795565	9616	1705	sense-overlapping	XM_017588749.1	Chr1:104575765_104941554_+	Nav2	GeneID:171563,Genbank:XM_017588749.1,RGD:619778	neuron navigator 2, transcript variant X12	GO:0005654,GO:0007399,GO:0007605,GO:0007608,GO:0007626,GO:0008201,GO:0021554,GO:0021563,GO:0021564,GO:0003025,GO:0005578,GO:0005614	nucleoplasm|nervous system development|sensory perception of sound|sensory perception of smell|locomotory behavior|heparin binding|optic nerve development|glossopharyngeal nerve development|vagus nerve development|regulation of systemic arterial blood pressure by baroreceptor feedback|proteinaceous extracellular matrix|interstitial matrix
circRNA_1551|Chr12:25431687_25435591_+	1.86461366	3.729227319	0	0	#NAME?	0.026363498	1	Down	0.053865127	0.042923377	0.021977329	0	0	0	Chr12	+	25431687	25435591	3905	297	sense-overlapping	XM_008769141.1	Chr12:25410804_25487970_+	Gtf2i	GeneID:353256,Genbank:XM_008769141.1,RGD:727961	general transcription factor II I, transcript variant X10	GO:0007275,GO:0003677,GO:0009790,GO:0003700,GO:0014886,GO:0005575,GO:0005634,GO:0005654,GO:0016525,GO:0005737,GO:0042995,GO:0006351,GO:0043025,GO:0006355,GO:0051019,GO:0006357,GO:0000981,GO:0051481,GO:0003674,GO:0006366	multicellular organism development|DNA binding|embryo development|DNA binding transcription factor activity|transition between slow and fast fiber|cellular_component|nucleus|nucleoplasm|negative regulation of angiogenesis|cytoplasm|cell projection|transcription, DNA-templated|neuronal cell body|regulation of transcription, DNA-templated|mitogen-activated protein kinase binding|regulation of trans…	rno03022,rno04022,rno05168	Basal transcription factors|cGMP - PKG signaling pathway|Herpes simplex infection
circRNA_1603|Chr12:41157218_41200958_+	186.0060831	13.03247023	358.9796959	27.54502329	4.783719777	9.88E-06	0.030168815	Up	0	0.160962665	0.252739287	6.589910777	1.324257041	4.385193955	Chr12	+	41157218	41200958	43741	34891	sense-overlapping	NM_001009680.1	Chr12:41155489_41167501_+	Oas1i	GeneID:304507,Genbank:NM_001009680.1,RGD:1359379	2 ' -5 ' oligoadenylate synthetase 1I	GO:0005524,GO:0005634,GO:0005654,GO:0005829,GO:0006955,GO:0016020,GO:0016021,GO:0016779,GO:0045071,GO:0051607,GO:0001730,GO:0060700,GO:0003725	ATP binding|nucleus|nucleoplasm|cytosol|immune response|membrane|integral component of membrane|nucleotidyltransferase activity|negative regulation of viral genome replication|defense response to virus|2'-5'-oligoadenylate synthetase activity|regulation of ribonuclease activity|double-stranded RNA binding
circRNA_2161|Chr14:106916021_106930939_-	1.695276687	3.390553374	0	0	#NAME?	0.040883633	1	Down	0.043092101	0.032192533	0.032965994	0	0	0	Chr14	-	106916021	106930939	14919	742	sense-overlapping	NM_001305130.1	Chr14:106871426_107125382_-	Ehbp1	GeneID:305556,Genbank:NM_001305130.1,RGD:1310604	EH domain binding protein 1	GO:0005886,GO:0005829	plasma membrane|cytosol
circRNA_2171|Chr14:110683107_110709166_+	1.86633295	3.732665901	0	0	#NAME?	0.026309349	1	Down	0.032319076	0.021461689	0.065931988	0	0	0	Chr14	+	110683107	110709166	26060	444	sense-overlapping	NM_001191684.1	Chr14:110676090_110740317_+	Fancl	GeneID:305600,Genbank:NM_001191684.1,RGD:1311427	Fanconi anemia, complementation group L	GO:0006281,GO:0006513,GO:0006974,GO:0007276,GO:0016567,GO:0016604,GO:0031625,GO:0042127,GO:0043231,GO:0043240,GO:0004842,GO:0061630,GO:0005634,GO:0005635	DNA repair|protein monoubiquitination|cellular response to DNA damage stimulus|gamete generation|protein ubiquitination|nuclear body|ubiquitin protein ligase binding|regulation of cell proliferation|intracellular membrane-bounded organelle|Fanconi anaemia nuclear complex|ubiquitin-protein transferase activity|ubiquitin protein ligase activity|nucleus|nuclear envelope	rno04120,rno03460	Ubiquitin mediated proteolysis|Fanconi anemia pathway
circRNA_2246|Chr15:33610716_33637119_-	12.32347378	18.40305272	6.243894845	0.339285821	-1.559426957	0.038964287	1	Down	0.107730253	0.171693509	0.307682611	0	0.072420307	0.113232708	Chr15	-	33610716	33637119	26404	25030	sense-overlapping	XM_017599642.1	Chr15:33605769_33657761_-	Myh7	GeneID:29557,Genbank:XM_017599642.1,RGD:62030	myosin, heavy chain 7, cardiac muscle, beta, transcript variant X1	GO:0003009,GO:0003777,GO:0005516,GO:0005524,GO:0005737,GO:0014898,GO:0005859,GO:0006936,GO:0016459,GO:0016887,GO:0030016,GO:0046034,GO:0030017,GO:0030018,GO:0046982,GO:0051015,GO:0055010,GO:0060048,GO:0000146,GO:1904385,GO:1905243,GO:0001725,GO:0002026,GO:0002027,GO:0006941,GO:0007018,GO:0007512,GO:0007568,GO:0008017,GO:0014728,GO:0030049,GO:0014883,GO:0030898,GO:0031449,GO:0032982,GO:0042803	skeletal muscle contraction|microtubule motor activity|calmodulin binding|ATP binding|cytoplasm|cardiac muscle hypertrophy in response to stress|muscle myosin complex|muscle contraction|myosin complex|ATPase activity|myofibril|ATP metabolic process|sarcomere|Z disc|protein heterodimerization activity|actin filament binding|ventricular cardiac muscle tissue morphogenesis|cardiac muscle contraction…	rno04022,rno04260,rno04261,rno05410,rno05414,rno05416	cGMP - PKG signaling pathway|Cardiac muscle contraction|Adrenergic signaling in cardiomyocytes|Hypertrophic cardiomyopathy (HCM)|Dilated cardiomyopathy (DCM)|Viral myocarditis
circRNA_2269|Chr15:38651172_38701205_-	23.02799479	4.691515316	41.36447426	8.816868639	3.140266365	0.031323557	1	Up	0.096957228	0	0.054943323	0.430919206	0.134494856	0.761747307	Chr15	-	38651172	38701205	50034	42367	sense-overlapping	XM_017599895.1	Chr15:38692817_39683417_-	Phf11	GeneID:361051,Genbank:XM_017599895.1,RGD:1310853	PHD finger protein 11, transcript variant X1	GO:0006355,GO:0031965,GO:0046872,GO:0005634,GO:0005654,GO:0006351	regulation of transcription, DNA-templated|nuclear membrane|metal ion binding|nucleus|nucleoplasm|transcription, DNA-templated
circRNA_2485|Chr16:29875983_29886801_-	19.31057744	0.680786471	37.94036841	55.73020325	5.80038751	0.001303204	1	Up	0	0	0.021977329	0.683164594	0.041383033	0.566163539	Chr16	-	29875983	29886801	10819	993	sense-overlapping	XM_017600406.1	Chr16:29816144_29936220_-	Ddx60	GeneID:100360801,Genbank:XM_017600406.1,RGD:1560014	DEXD/H-box helicase 60, transcript variant X1
circRNA_2489|Chr16:31276145_31302160_-	2.632772316	0	5.265544632	Inf	Inf	0.026096496	1	Up	0	0	0	0.042040898	0.020691516	0.102938825	Chr16	-	31276145	31302160	26016	1328	sense-overlapping	XM_017600408.1	Chr16:31187176_31315087_-	LOC100911190	GeneID:100911190,Genbank:XM_017600408.1,RGD:6494112	probable ATP-dependent RNA helicase DDX60-like
circRNA_2490|Chr16:31292966_31302160_-	2.293022832	0	4.586045663	Inf	Inf	0.025427042	1	Up	0	0	0	0.084081796	0	0.072057178	Chr16	-	31292966	31302160	9195	1124	sense-overlapping	XM_017600408.1	Chr16:31187176_31315087_-	LOC100911190	GeneID:100911190,Genbank:XM_017600408.1,RGD:6494112	probable ATP-dependent RNA helicase DDX60-like
circRNA_2512|Chr16:50437205_50487053_-	3.811625703	0	7.623251406	Inf	Inf	0.020586665	1	Up	0	0	0	0	0.093111823	0.133820473	Chr16	-	50437205	50487053	49849	3601	sense-overlapping	XM_017600260.1	Chr16:50372150_50498939_-	Fat1	GeneID:83720,Genbank:XM_017600260.1,RGD:621254	FAT atypical cadherin 1, transcript variant X2	GO:0098609,GO:0005886,GO:0005911,GO:0007015,GO:0007156,GO:0007163,GO:0016021,GO:0016324,GO:0030027,GO:0030054,GO:0030175,GO:0045197,GO:0003382,GO:0048471,GO:0005509,GO:0048593,GO:0005634	cell-cell adhesion|plasma membrane|cell-cell junction|actin filament organization|homophilic cell adhesion via plasma membrane adhesion molecules|establishment or maintenance of cell polarity|integral component of membrane|apical plasma membrane|lamellipodium|cell junction|filopodium|establishment or maintenance of epithelial cell apical/basal polarity|epithelial cell morphogenesis|perinuclear re…
circRNA_2836|Chr17:87758882_87771508_-	4.750871035	1.705029415	7.796712655	4.572773107	2.193069337	0.044171305	1	Up	0.021546051	0.032192533	0	0.094592021	0.134494856	0.030881648	Chr17	-	87758882	87771508	12627	2151	sense-overlapping	NM_001191693.1	Chr17:87725978_87797436_-	Arhgap21	GeneID:307178,Genbank:NM_001191693.1,RGD:1311028	Rho GTPase activating protein 21	GO:0007030,GO:0007165,GO:0015629,GO:0030054,GO:0030100,GO:0043547,GO:0051645,GO:0051683,GO:0051684,GO:0005096,GO:0072384,GO:0005794,GO:0005886	Golgi organization|signal transduction|actin cytoskeleton|cell junction|regulation of endocytosis|positive regulation of GTPase activity|Golgi localization|establishment of Golgi localization|maintenance of Golgi location|GTPase activator activity|organelle transport along microtubule|Golgi apparatus|plasma membrane
circRNA_2941|Chr18:29409770_29412096_+	1.86136275	3.722725501	0	0	#NAME?	0.026466464	1	Down	0.053865127	0.032192533	0.032965994	0	0	0	Chr18	+	29409770	29412096	2327	296	sense-overlapping	NM_001204053.1	Chr18:29386906_29485611_+	Ankhd1	GeneID:100529260,Genbank:NM_001204053.1,RGD:4892133	ankyrin repeat and KH domain containing 1	GO:0005515,GO:0005737,GO:0045087	protein binding|cytoplasm|innate immune response
circRNA_3048|Chr18:65825830_65841509_+	6.02607719	10.59045052	1.461703856	0.138020932	-2.85704101	0.003664954	1	Down	0.086184203	0.171693509	0.076920653	0.031530674	0.020691516	0	Chr18	+	65825830	65841509	15680	1387	sense-overlapping	NM_001115025.1	Chr18:65814026_65885115_+	Mbd2	GeneID:680172,Genbank:NM_001115025.1,RGD:1595452	methyl-CpG binding domain protein 2	GO:0003682,GO:0003729,GO:0005634,GO:0005654,GO:0005730,GO:0031667,GO:0005737,GO:0032355,GO:0005829,GO:0034622,GO:0035197,GO:0035563,GO:0042127,GO:0042711,GO:0044030,GO:0048568,GO:0000118,GO:0000122,GO:0000785,GO:0000790,GO:0000792,GO:0003677,GO:0006346,GO:0007507,GO:0007568,GO:0008327,GO:0009612,GO:0070742,GO:0014070,GO:0071407,GO:0019904,GO:0030177	chromatin binding|mRNA binding|nucleus|nucleoplasm|nucleolus|response to nutrient levels|cytoplasm|response to estradiol|cytosol|cellular protein-containing complex assembly|siRNA binding|positive regulation of chromatin binding|regulation of cell proliferation|maternal behavior|regulation of DNA methylation|embryonic organ development|histone deacetylase complex|negative regulation of transcript…
circRNA_3154|Chr19:29642344_29645344_-	7.868853998	11.94208307	3.795624929	0.317836085	-1.653645167	0.034578697	1	Down	0.107730253	0.182424354	0.087909317	0.052551123	0	0.072057178	Chr19	-	29642344	29645344	3001	268	sense-overlapping	XM_008772464.2	Chr19:29592889_30341524_-	Inpp4b	GeneID:116699,Genbank:XM_008772464.2,RGD:620470	inositol polyphosphate-4-phosphatase type II B, transcript variant X4	GO:0046822,GO:0005794,GO:0046850,GO:0006874,GO:0051896,GO:0007165,GO:0008150,GO:0008289,GO:0016311,GO:0016316,GO:0034593,GO:0034594,GO:0034597,GO:0005575,GO:0036092,GO:0005737,GO:0045671	regulation of nucleocytoplasmic transport|Golgi apparatus|regulation of bone remodeling|cellular calcium ion homeostasis|regulation of protein kinase B signaling|signal transduction|biological_process|lipid binding|dephosphorylation|phosphatidylinositol-3,4-bisphosphate 4-phosphatase activity|phosphatidylinositol bisphosphate phosphatase activity|phosphatidylinositol trisphosphate phosphatase act…	rno00562,rno04070	Inositol phosphate metabolism|Phosphatidylinositol signaling system
circRNA_3235|Chr19:43899905_43908769_-	7.086036612	14.17207322	0	0	#NAME?	0.008256618	1	Down	0.290871684	0.160962665	0	0	0	0	Chr19	-	43899905	43908769	8865	7179	sense-overlapping	NM_012536.1	Chr19:43906344_43911020_-	Ctrb1	GeneID:24291,Genbank:NM_012536.1,RGD:2444	chymotrypsinogen B1	GO:0043434,GO:0005615,GO:0005737,GO:0005764,GO:0006508,GO:0007584,GO:0007586,GO:0008233,GO:0009636,GO:0030163,GO:0032094,GO:0004252,GO:0034097,GO:0043065,GO:0005515	response to peptide hormone|extracellular space|cytoplasm|lysosome|proteolysis|response to nutrient|digestion|peptidase activity|response to toxic substance|protein catabolic process|response to food|serine-type endopeptidase activity|response to cytokine|positive regulation of apoptotic process|protein binding	rno04972,rno04974	Pancreatic secretion|Protein digestion and absorption
circRNA_3342|Chr2:25786589_25787923_-	2.188172455	0	4.376344909	Inf	Inf	0.013866042	1	Up	0	0	0	0.063061347	0.020691516	0.061763295	Chr2	-	25786589	25787923	1335	271	sense-overlapping	NM_001108542.1	Chr2:25738514_26011429_-	Arhgef28	GeneID:361882,Genbank:NM_001108542.1,RGD:1307061	Rho guanine nucleotide exchange factor 28	GO:0005737,GO:0005886,GO:0021955,GO:0035023,GO:0035556,GO:0046872,GO:0060052,GO:0003723,GO:0005085,GO:0005089	cytoplasm|plasma membrane|central nervous system neuron axonogenesis|regulation of Rho protein signal transduction|intracellular signal transduction|metal ion binding|neurofilament cytoskeleton organization|RNA binding|guanyl-nucleotide exchange factor activity|Rho guanyl-nucleotide exchange factor activity
circRNA_3346|Chr2:25924932_25927179_-	3.684915995	0.680786471	6.689045518	9.825467752	3.29652609	0.012318994	1	Up	0	0	0.021977329	0.063061347	0.113803339	0.04117553	Chr2	-	25924932	25927179	2248	442	sense-overlapping	NM_001108542.1	Chr2:25738514_26011429_-	Arhgef28	GeneID:361882,Genbank:NM_001108542.1,RGD:1307061	Rho guanine nucleotide exchange factor 28	GO:0005737,GO:0005886,GO:0021955,GO:0035023,GO:0035556,GO:0046872,GO:0060052,GO:0003723,GO:0005085,GO:0005089	cytoplasm|plasma membrane|central nervous system neuron axonogenesis|regulation of Rho protein signal transduction|intracellular signal transduction|metal ion binding|neurofilament cytoskeleton organization|RNA binding|guanyl-nucleotide exchange factor activity|Rho guanyl-nucleotide exchange factor activity
circRNA_3425|Chr2:52310449_52313280_+	2.034810277	4.069620555	0	0	#NAME?	0.017186515	1	Down	0.053865127	0.042923377	0.032965994	0	0	0	Chr2	+	52310449	52313280	2832	299	sense-overlapping	XM_008760780.1	Chr2:52300921_52328212_+	Paip1	GeneID:365684,Genbank:XM_008760780.1,RGD:1305668	poly(A) binding protein interacting protein 1, transcript variant X3	GO:0003723,GO:0008494,GO:0045727	RNA binding|translation activator activity|positive regulation of translation	rno03013	RNA transport
circRNA_3753|Chr2:218919131_218929338_-	1.872834769	3.745669538	0	0	#NAME?	0.026106479	1	Down	0.032319076	0.042923377	0.043954659	0	0	0	Chr2	-	218919131	218929338	10208	337	sense-overlapping	NM_001191715.1	Chr2:218888431_218951030_-	Slc30a7	GeneID:310801,Genbank:NM_001191715.1,RGD:1307873	solute carrier family 30 member 7	GO:0071577,GO:0005794,GO:0006829,GO:0010043,GO:0016020,GO:0016021,GO:0031410,GO:0031982,GO:0032119,GO:0048471,GO:0005385,GO:0061088,GO:0005737	zinc ion transmembrane transport|Golgi apparatus|zinc ion transport|response to zinc ion|membrane|integral component of membrane|cytoplasmic vesicle|vesicle|sequestering of zinc ion|perinuclear region of cytoplasm|zinc ion transmembrane transporter activity|regulation of sequestering of zinc ion|cytoplasm
circRNA_3830|Chr2:248222990_248253593_+	93.08625282	14.79295277	171.3795529	11.58521598	3.534213035	0.037428562	1	Up	0	0.257540264	0.208784629	2.585515233	0	3.098458639	Chr2	+	248222990	248253593	30604	15144	sense-overlapping	XM_003749409.4	Chr2:248215324_248241278_+	LOC685067	GeneID:685067,Genbank:XM_003749409.4,RGD:1583235	similar to guanylate binding protein family, member 6, transcript variant X1
circRNA_3871|Chr20:3196267_3282058_+	92.84532786	56.93697419	128.7536815	2.261336914	1.177175954	0.029511849	1	Up	0.527878241	0.815544169	0.461523916	1.072042902	1.241490976	1.791135559	Chr20	+	3196267	3282058	85792	85274	sense-overlapping	NM_001008826.3	Chr20:3189457_3197457_+	RT1-T24-4	GeneID:414784,Genbank:NM_001008826.3,RGD:1598233	RT1 class I, locus T24, gene 4	GO:0006955,GO:0016021,GO:0042605,GO:0042612,GO:0002474,GO:0005102,GO:0005886	immune response|integral component of membrane|peptide antigen binding|MHC class I protein complex|antigen processing and presentation of peptide antigen via MHC class I|signaling receptor binding|plasma membrane	rno04514,rno04144,rno04145,rno04218,rno04650,rno04612,rno05203,rno05320,rno05330,rno05332,rno05416,rno04940,rno05166,rno05168,rno05167,rno05169,rno05165	Cell adhesion molecules (CAMs)|Endocytosis|Phagosome|Cellular senescence|Natural killer cell mediated cytotoxicity|Antigen processing and presentation|Viral carcinogenesis|Autoimmune thyroid disease|Allograft rejection|Graft-versus-host disease|Viral myocarditis|Type I diabetes mellitus|HTLV-I infection|Herpes simplex infection|Kaposi's sarcoma-associated herpesvirus infection|Epstein-Barr virus …
circRNA_3876|Chr20:3793913_3795990_-	14.9652793	0	29.9305586	Inf	Inf	0.001087445	1	Up	0	0	0	0.578062349	0.475904874	0	Chr20	-	3793913	3795990	2078	771	sense-overlapping	XM_008772769.2	Chr20:3791412_3796550_-	LOC103690108	GeneID:103690108,Genbank:XM_008772769.2,RGD:9113230	class I histocompatibility antigen, Non-RT1.A alpha-1 chain-like
circRNA_3949|Chr20:20259263_20276110_+	2.201755986	4.403511972	0	0	#NAME?	0.011310988	1	Down	0.053865127	0.032192533	0.054943323	0	0	0	Chr20	+	20259263	20276110	16848	708	sense-overlapping	NM_001033984.1	Chr20:20105047_20471282_+	Ank3	GeneID:361833,Genbank:NM_001033984.1,RGD:620157	ankyrin 3, node of Ranvier (ankyrin G), transcript variant 2	GO:0007165,GO:0007409,GO:0007411,GO:0007528,GO:0008092,GO:0009925,GO:0009986,GO:0030018,GO:0010628,GO:0030315,GO:0010650,GO:0030424,GO:0010765,GO:0030425,GO:0030507,GO:0030674,GO:0031594,GO:0044325,GO:0033268,GO:0045184,GO:0033270,GO:0045202,GO:0045211,GO:0045296,GO:0045838,GO:0000281,GO:1902260,GO:0050808,GO:0005200,GO:0071286,GO:0005515,GO:2000651,GO:0005764,GO:2001259,GO:0005886,GO:0005923,GO:…	signal transduction|axonogenesis|axon guidance|neuromuscular junction development|cytoskeletal protein binding|basal plasma membrane|cell surface|Z disc|positive regulation of gene expression|T-tubule|positive regulation of cell communication by electrical coupling|axon|positive regulation of sodium ion transport|dendrite|spectrin binding|protein binding, bridging|neuromuscular junction|ion chann…	rno05205	Proteoglycans in cancer
circRNA_4126|Chr3:21721366_21736929_+	1.868724214	3.737448428	0	0	#NAME?	0.026234388	1	Down	0.043092101	0.042923377	0.032965994	0	0	0	Chr3	+	21721366	21736929	15564	1411	sense-overlapping	XM_017591852.1	Chr3:21698037_21815333_+	Rabgap1	GeneID:311911,Genbank:XM_017591852.1,RGD:1304691	RAB GTPase activating protein 1, transcript variant X1	GO:0005829,GO:0006886,GO:0012505,GO:0017137,GO:0031338,GO:0043087,GO:0090630,GO:1902017,GO:0005096,GO:0005622	cytosol|intracellular protein transport|endomembrane system|Rab GTPase binding|regulation of vesicle fusion|regulation of GTPase activity|activation of GTPase activity|regulation of cilium assembly|GTPase activator activity|intracellular
circRNA_4178|Chr3:44500847_44522988_-	1.865473305	3.73094661	0	0	#NAME?	0.026336397	1	Down	0.043092101	0.032192533	0.043954659	0	0	0	Chr3	-	44500847	44522988	22142	369	sense-overlapping	XM_008761864.2	Chr3:44432476_44529465_-	Acvr1	GeneID:79558,Genbank:XM_008761864.2,RGD:620200	activin A receptor type 1, transcript variant X1	GO:1905007,GO:2000017,GO:2001237,GO:0001707,GO:0001755,GO:0002526,GO:0003143,GO:0004702,GO:0003148,GO:0005025,GO:0003181,GO:0005524,GO:0005887,GO:0009968,GO:0006468,GO:0010862,GO:0016361,GO:0000082,GO:0032926,GO:0018107,GO:0001569,GO:0042803,GO:0001655,GO:0045177,GO:0001701,GO:0045669,GO:0001702,GO:0048641,GO:0050431,GO:0045893,GO:0045944,GO:0051145,GO:0060037,GO:0060412,GO:0060389,GO:0060923,GO:…	positive regulation of epithelial to mesenchymal transition involved in endocardial cushion formation|positive regulation of determination of dorsal identity|negative regulation of extrinsic apoptotic signaling pathway|mesoderm formation|neural crest cell migration|acute inflammatory response|embryonic heart tube morphogenesis|signal transducer, downstream of receptor, with serine/threonine kinas…	rno04350,rno04060,rno04550,rno05418	TGF-beta signaling pathway|Cytokine-cytokine receptor interaction|Signaling pathways regulating pluripotency of stem cells|Fluid shear stress and atherosclerosis
circRNA_4225|Chr3:60610877_60624155_-	2.378454422	4.756908844	0	0	#NAME?	0.007387107	1	Down	0.053865127	0.053654222	0.043954659	0	0	0	Chr3	-	60610877	60624155	13279	241	sense-overlapping	XM_006234389.3	Chr3:60512360_60624671_-	Chn1	GeneID:84030,Genbank:XM_006234389.3,RGD:620139	chimerin 1, transcript variant X4	GO:0048013,GO:0005622,GO:0005737,GO:0050770,GO:0007165,GO:0008045,GO:0035556,GO:0043087,GO:0051056,GO:0043547,GO:0046872,GO:0001565,GO:0046875,GO:0005096	ephrin receptor signaling pathway|intracellular|cytoplasm|regulation of axonogenesis|signal transduction|motor neuron axon guidance|intracellular signal transduction|regulation of GTPase activity|regulation of small GTPase mediated signal transduction|positive regulation of GTPase activity|metal ion binding|phorbol ester receptor activity|ephrin receptor binding|GTPase activator activity
circRNA_4461|Chr3:152966158_152973518_-	2.40056848	0	4.80113696	Inf	Inf	0.008990014	1	Up	0	0	0	0.042040898	0.082766065	0.030881648	Chr3	-	152966158	152973518	7361	7361	sense-overlapping	XM_017591993.1	Chr3:152942838_153004040_-	Sla2	GeneID:499931,Genbank:XM_017591993.1,RGD:1562071	Src-like-adaptor 2, transcript variant X3	GO:0038083,GO:0005102,GO:0042110,GO:0005654,GO:0042127,GO:0005770,GO:0005794,GO:0005886,GO:0043231,GO:0007169,GO:0045087,GO:0009967,GO:0047485,GO:0016477,GO:0050849,GO:0030154,GO:0000122,GO:0031234,GO:0004715,GO:0031410,GO:0005070	peptidyl-tyrosine autophosphorylation|signaling receptor binding|T cell activation|nucleoplasm|regulation of cell proliferation|late endosome|Golgi apparatus|plasma membrane|intracellular membrane-bounded organelle|transmembrane receptor protein tyrosine kinase signaling pathway|innate immune response|positive regulation of signal transduction|protein N-terminus binding|cell migration|negative re…
circRNA_4510|Chr3:175512077_175516165_+	2.001956515	0	4.003913031	Inf	Inf	0.020871365	1	Up	0	0	0	0.063061347	0.031037274	0.04117553	Chr3	+	175512077	175516165	4089	567	sense-overlapping	XM_006235816.3	Chr3:175493650_175538965_+	Osbpl2	GeneID:296461,Genbank:XM_006235816.3,RGD:1311312	oxysterol binding protein-like 2, transcript variant X1	GO:0006869,GO:0015485	lipid transport|cholesterol binding
circRNA_4559|Chr4:10437864_10452881_-	1.761261426	0	3.522522852	Inf	Inf	0.034240117	1	Up	0	0	0	0.073571572	0.051728791	0	Chr4	-	10437864	10452881	15018	336	sense-overlapping	XM_006235935.3	Chr4:10423090_10517884_-	Gsap	GeneID:311984,Genbank:XM_006235935.3,RGD:1563271	gamma-secretase activating protein, transcript variant X1	GO:1902004,GO:0001540,GO:0005802,GO:0030162	positive regulation of amyloid-beta formation|amyloid-beta binding|trans-Golgi network|regulation of proteolysis
circRNA_4612|Chr4:31220330_31320090_+	22.27888815	3.392272665	41.16550363	12.13508102	3.601111835	0.000805568	1	Up	0.032319076	0.021461689	0.054943323	0.525511226	0.186223646	0.638220716	Chr4	+	31220330	31320090	99761	99761	antisense	XM_008762739.1	Chr4:31134165_31757006_-	Slc25a13	GeneID:362322,Genbank:XM_008762739.1,RGD:1565889	solute carrier family 25 member 13, transcript variant X1	GO:0022857,GO:0005509,GO:0043490,GO:0005575,GO:0005739,GO:0005743,GO:0006754,GO:0006839,GO:0008150,GO:0045333,GO:0015183,GO:0051592,GO:0015810,GO:0003674,GO:0015813,GO:0005313,GO:0016021	transmembrane transporter activity|calcium ion binding|malate-aspartate shuttle|cellular_component|mitochondrion|mitochondrial inner membrane|ATP biosynthetic process|mitochondrial transport|biological_process|cellular respiration|L-aspartate transmembrane transporter activity|response to calcium ion|aspartate transmembrane transport|molecular_function|L-glutamate transmembrane transport|L-glutam…
circRNA_4627|Chr4:38263240_38271681_+	5.256259359	8.126237473	2.386281244	0.293651429	-1.767823438	0.047682066	1	Down	0.107730253	0.064385066	0.087909317	0	0.051728791	0.020587765	Chr4	+	38263240	38271681	8442	909	sense-overlapping	XM_006236105.3	Chr4:38241189_38420199_+	Phf14	GeneID:500030,Genbank:XM_006236105.3,RGD:1563764	PHD finger protein 14, transcript variant X2	GO:0046872,GO:0048286,GO:0072201,GO:2000584,GO:2000791,GO:0000122,GO:0005634,GO:0008285	metal ion binding|lung alveolus development|negative regulation of mesenchymal cell proliferation|negative regulation of platelet-derived growth factor receptor-alpha signaling pathway|negative regulation of mesenchymal cell proliferation involved in lung development|negative regulation of transcription by RNA polymerase II|nucleus|negative regulation of cell proliferation
circRNA_4710|Chr4:66193731_66214585_+	2.546259776	5.092519552	0	0	#NAME?	0.004896084	1	Down	0.043092101	0.032192533	0.087909317	0	0	0	Chr4	+	66193731	66214585	20855	1410	sense-overlapping	XM_006236306.3	Chr4:66164639_66241524_+	Ubn2	GeneID:312248,Genbank:XM_006236306.3,RGD:1310722	ubinuclein 2, transcript variant X1	GO:0005654	nucleoplasm
circRNA_4729|Chr4:70820222_70825218_+	2.058613959	4.117227919	0	0	#NAME?	0.032049611	1	Down	0	0.053654222	0.076920653	0	0	0	Chr4	+	70820222	70825218	4997	4997	intergenic
circRNA_4758|Chr4:88610656_88627387_-	8.37848838	2.366310431	14.39066633	6.081478636	2.60442214	0.03882523	1	Up	0.021546051	0	0.054943323	0.168163592	0.051728791	0.247053181	Chr4	-	88610656	88627387	16732	1158	sense-overlapping	XM_008762963.2	Chr4:88606851_88649424_-	Herc6	GeneID:362376,Genbank:XM_008762963.2,RGD:1561739	HECT and RLD domain containing E3 ubiquitin protein ligase family member 6, transcript variant X2	GO:0005634,GO:0005737,GO:0005829,GO:0016567,GO:0061630,GO:0002244,GO:0004842	nucleus|cytoplasm|cytosol|protein ubiquitination|ubiquitin protein ligase activity|hematopoietic progenitor cell differentiation|ubiquitin-protein transferase activity
circRNA_4916|Chr4:157436084_157436365_-	13.14654528	4.318237644	21.97485293	5.08884752	2.347338964	0.002148428	1	Up	0.140049329	0	0	0.220714715	0.310372744	0.185289885	Chr4	-	157436084	157436365	282	132	sense-overlapping	NM_031975.2	Chr4:157435371_157439507_-	Ptms	GeneID:83801,Genbank:NM_031975.2,RGD:621529	parathymosin	GO:0008270,GO:0043086,GO:0002376,GO:0004857,GO:0005829	zinc ion binding|negative regulation of catalytic activity|immune system process|enzyme inhibitor activity|cytosol
circRNA_4917|Chr4:157436084_157436371_-	9.061014048	0	18.1220281	Inf	Inf	2.01E-08	0.000123091	Up	0	0	0	0.32581696	0.175877888	0.12352659	Chr4	-	157436084	157436371	288	138	sense-overlapping	NM_031975.2	Chr4:157435371_157439507_-	Ptms	GeneID:83801,Genbank:NM_031975.2,RGD:621529	parathymosin	GO:0008270,GO:0043086,GO:0002376,GO:0004857,GO:0005829	zinc ion binding|negative regulation of catalytic activity|immune system process|enzyme inhibitor activity|cytosol
circRNA_4919|Chr4:157436084_157436610_-	2.353978767	4.707957534	0	0	#NAME?	0.021031515	1	Down	0.075411177	0	0.076920653	0	0	0	Chr4	-	157436084	157436610	527	183	sense-overlapping	NM_031975.2	Chr4:157435371_157439507_-	Ptms	GeneID:83801,Genbank:NM_031975.2,RGD:621529	parathymosin	GO:0008270,GO:0043086,GO:0002376,GO:0004857,GO:0005829	zinc ion binding|negative regulation of catalytic activity|immune system process|enzyme inhibitor activity|cytosol
circRNA_5020|Chr5:7725207_7780390_-	5.745336404	9.58436909	1.906303718	0.198897152	-2.329905475	0.016936514	1	Down	0.032319076	0.128770132	0.142852641	0.021020449	0.020691516	0.020587765	Chr5	-	7725207	7780390	55184	1863	sense-overlapping	XM_017593321.1	Chr5:7622668_7867284_-	Prex2	GeneID:312912,Genbank:XM_017593321.1,RGD:1307865	phosphatidylinositol-3,4,5-trisphosphate-dependent Rac exchange factor 2, transcript variant X2	GO:0005886,GO:0006469,GO:0007186,GO:0008344,GO:0014065,GO:0030676,GO:0032007,GO:0035023,GO:0005096,GO:0043547,GO:0005622,GO:0048813,GO:0005737	plasma membrane|negative regulation of protein kinase activity|G-protein coupled receptor signaling pathway|adult locomotory behavior|phosphatidylinositol 3-kinase signaling|Rac guanyl-nucleotide exchange factor activity|negative regulation of TOR signaling|regulation of Rho protein signal transduction|GTPase activator activity|positive regulation of GTPase activity|intracellular|dendrite morphog…
circRNA_5027|Chr5:7763385_7798747_-	1.815740576	0	3.631481152	Inf	Inf	0.031769952	1	Up	0	0	0	0.063061347	0.041383033	0.020587765	Chr5	-	7763385	7798747	35363	1119	sense-overlapping	XM_017593321.1	Chr5:7622668_7867284_-	Prex2	GeneID:312912,Genbank:XM_017593321.1,RGD:1307865	phosphatidylinositol-3,4,5-trisphosphate-dependent Rac exchange factor 2, transcript variant X2	GO:0005886,GO:0006469,GO:0007186,GO:0008344,GO:0014065,GO:0030676,GO:0032007,GO:0035023,GO:0005096,GO:0043547,GO:0005622,GO:0048813,GO:0005737	plasma membrane|negative regulation of protein kinase activity|G-protein coupled receptor signaling pathway|adult locomotory behavior|phosphatidylinositol 3-kinase signaling|Rac guanyl-nucleotide exchange factor activity|negative regulation of TOR signaling|regulation of Rho protein signal transduction|GTPase activator activity|positive regulation of GTPase activity|intracellular|dendrite morphog…
circRNA_5382|Chr5:144539229_144547479_-	3.019698999	0.664344253	5.375053745	8.090765777	3.016276258	0.031693953	1	Up	0.021546051	0	0	0.105102245	0.051728791	0.030881648	Chr5	-	144539229	144547479	8251	829	sense-overlapping	XM_006238862.2	Chr5:144501875_144557165_-	Ago4	GeneID:298533,Genbank:XM_006238862.2,RGD:1304583	argonaute 4, RISC catalytic component, transcript variant X1	GO:0035068,GO:0008150,GO:0003725,GO:0035196,GO:0008584,GO:0003727,GO:0035198,GO:0010501,GO:0003743,GO:0035278,GO:0005575,GO:0005634,GO:0005654,GO:0005737,GO:0010586,GO:0005829,GO:0035279,GO:0016442,GO:0035280,GO:0016604,GO:0006402,GO:0043066,GO:0006413,GO:0000932,GO:0070578,GO:0022604,GO:0007130,GO:0003674,GO:0090625,GO:0031054,GO:0007140,GO:0003723	micro-ribonucleoprotein complex|biological_process|double-stranded RNA binding|production of miRNAs involved in gene silencing by miRNA|male gonad development|single-stranded RNA binding|miRNA binding|RNA secondary structure unwinding|translation initiation factor activity|miRNA mediated inhibition of translation|cellular_component|nucleus|nucleoplasm|cytoplasm|miRNA metabolic process|cytosol|mRN…
circRNA_5485|Chr5:167014847_167016955_-	3.446339394	0.693790108	6.19888868	8.934818483	3.15943842	0.020490769	1	Up	0	0.021461689	0	0.042040898	0.093111823	0.061763295	Chr5	-	167014847	167016955	2109	755	sense-overlapping	XM_006239459.3	Chr5:166994683_167025264_-	H6pd	GeneID:298655,Genbank:XM_006239459.3,RGD:1306562	hexose-6-phosphate dehydrogenase (glucose 1-dehydrogenase), transcript variant X1	GO:0005739,GO:0005975,GO:0006006,GO:0006098,GO:0006739,GO:0017057,GO:0030246,GO:0043231,GO:0050661,GO:0055114,GO:0097305,GO:0004345,GO:0005737	mitochondrion|carbohydrate metabolic process|glucose metabolic process|pentose-phosphate shunt|NADP metabolic process|6-phosphogluconolactonase activity|carbohydrate binding|intracellular membrane-bounded organelle|NADP binding|oxidation-reduction process|response to alcohol|glucose-6-phosphate dehydrogenase activity|cytoplasm	rno00030	Pentose phosphate pathway
circRNA_5590|Chr6:12179226_12194014_+	3.942274157	1.021179707	6.863368607	6.721019388	2.748680065	0.020580693	1	Up	0	0	0.032965994	0.094592021	0.062074549	0.072057178	Chr6	+	12179226	12194014	14789	711	sense-overlapping	XM_006239736.2	Chr6:12158127_12202220_+	Foxn2	GeneID:301676,Genbank:XM_006239736.2,RGD:1562291	forkhead box N2, transcript variant X2	GO:0030154,GO:0035914,GO:0043231,GO:0043565,GO:0045893,GO:0003700,GO:0005634	cell differentiation|skeletal muscle cell differentiation|intracellular membrane-bounded organelle|sequence-specific DNA binding|positive regulation of transcription, DNA-templated|DNA binding transcription factor activity|nucleus
circRNA_5784|Chr6:80235400_80248440_+	1.706748706	3.413497411	0	0	#NAME?	0.040289317	1	Down	0.021546051	0.042923377	0.043954659	0	0	0	Chr6	+	80235400	80248440	13041	387	sense-overlapping	XM_008764679.2	Chr6:80188721_80286918_+	LOC100912115	GeneID:100912115,Genbank:XM_008764679.2,RGD:6488546	cutaneous T-cell lymphoma-associated antigen 5 homolog, transcript variant X5	GO:1905097,GO:0009306,GO:0016021,GO:0032527,GO:0035459,GO:0042632,GO:0042953,GO:0042954,GO:0070328,GO:0070971,GO:0005789,GO:0006888,GO:0070973	regulation of guanyl-nucleotide exchange factor activity|protein secretion|integral component of membrane|protein exit from endoplasmic reticulum|cargo loading into vesicle|cholesterol homeostasis|lipoprotein transport|lipoprotein transporter activity|triglyceride homeostasis|endoplasmic reticulum exit site|endoplasmic reticulum membrane|ER to Golgi vesicle-mediated transport|protein localization…
circRNA_5940|Chr6:133775080_133791177_+	8.699015255	14.0416149	3.35641561	0.239033447	-2.064715592	0.047856991	1	Down	0.075411177	0.236078575	0.131863976	0	0.103457581	0	Chr6	+	133775080	133791177	16098	16098	intergenic
circRNA_5947|Chr6:133779483_133791177_+	1.709999615	3.419999229	0	0	#NAME?	0.040123298	1	Down	0.021546051	0.053654222	0.032965994	0	0	0	Chr6	+	133779483	133791177	11695	11695	intergenic
circRNA_5963|Chr6:133791092_133795645_+	3.059252425	0	6.11850485	Inf	Inf	0.001692421	1	Up	0	0	0	0.094592021	0.082766065	0.030881648	Chr6	+	133791092	133795645	4554	4554	intergenic
circRNA_5975|Chr6:136059672_136084622_+	14.8816286	7.464956457	22.29830075	2.98706374	1.578728023	0.011457585	1	Up	0.107730253	0.096577599	0.032965994	0.336327185	0.16553213	0.247053181	Chr6	+	136059672	136084622	24951	361	sense-overlapping	XM_017594008.1	Chr6:136040957_136129780_+	Mark3	GeneID:170577,Genbank:XM_017594008.1,RGD:619883	microtubule affinity regulating kinase 3, transcript variant X1	GO:0004674,GO:0005524,GO:0005886,GO:0006468,GO:0030010,GO:0035331,GO:0000226	protein serine/threonine kinase activity|ATP binding|plasma membrane|protein phosphorylation|establishment of cell polarity|negative regulation of hippo signaling|microtubule cytoskeleton organization
circRNA_6060|Chr7:29284390_29288495_+	1.872834769	3.745669538	0	0	#NAME?	0.026106479	1	Down	0.032319076	0.042923377	0.043954659	0	0	0	Chr7	+	29284390	29288495	4106	332	sense-overlapping	NM_022385.3	Chr7:29282411_29293455_+	Arl1	GeneID:64187,Genbank:NM_022385.3,RGD:621326	ADP-ribosylation factor like GTPase 1	GO:0048193,GO:0009404,GO:0005525,GO:0019904,GO:0031584,GO:0005737,GO:0005794,GO:0005802,GO:0034067,GO:0005829,GO:0007030,GO:0042147,GO:0008047,GO:0000139,GO:0003924,GO:0046872	Golgi vesicle transport|toxin metabolic process|GTP binding|protein domain specific binding|activation of phospholipase D activity|cytoplasm|Golgi apparatus|trans-Golgi network|protein localization to Golgi apparatus|cytosol|Golgi organization|retrograde transport, endosome to Golgi|enzyme activator activity|Golgi membrane|GTPase activity|metal ion binding
circRNA_6087|Chr7:42328501_42339634_+	1.714969815	3.429939629	0	0	#NAME?	0.043833585	1	Down	0	0.042923377	0.065931988	0	0	0	Chr7	+	42328501	42339634	11134	666	sense-overlapping	NM_021843.4	Chr7:42269784_42351054_+	Kitlg	GeneID:60427,Genbank:NM_021843.4,RGD:3086	KIT ligand, transcript variant 1	GO:0050731,GO:0030175,GO:0008284,GO:0002763,GO:0070668,GO:0033026,GO:0005125,GO:0097192,GO:0035162,GO:0008584,GO:0005173,GO:1902035,GO:0035234,GO:0005615,GO:0005737,GO:0010469,GO:0005856,GO:0043066,GO:0016021,GO:0005886,GO:0043406,GO:0045636,GO:0030027,GO:0001541,GO:0045740,GO:0007155,GO:0001755,GO:0046579,GO:0008083,GO:0002687	positive regulation of peptidyl-tyrosine phosphorylation|filopodium|positive regulation of cell proliferation|positive regulation of myeloid leukocyte differentiation|positive regulation of mast cell proliferation|negative regulation of mast cell apoptotic process|cytokine activity|extrinsic apoptotic signaling pathway in absence of ligand|embryonic hemopoiesis|male gonad development|stem cell fa…	rno04014,rno04015,rno04010,rno04072,rno04151,rno04060,rno04640,rno04916,rno05200	Ras signaling pathway|Rap1 signaling pathway|MAPK signaling pathway|Phospholipase D signaling pathway|PI3K-Akt signaling pathway|Cytokine-cytokine receptor interaction|Hematopoietic cell lineage|Melanogenesis|Pathways in cancer
circRNA_6536|Chr8:67801800_67812158_-	2.212368359	4.424736718	0	0	#NAME?	0.011183431	1	Down	0.043092101	0.053654222	0.043954659	0	0	0	Chr8	-	67801800	67812158	10359	465	sense-overlapping	NM_001106829.2	Chr8:67771720_67869015_-	Pias1	GeneID:300772,Genbank:NM_001106829.2,RGD:1307843	protein inhibitor of activated STAT, 1	GO:0061665,GO:0031625,GO:0005634,GO:0065004,GO:0032436,GO:0033235,GO:0007283,GO:0008022,GO:0008134,GO:0008270,GO:0008542,GO:0016605,GO:0042127,GO:0016925,GO:0043066,GO:0019789,GO:0045444,GO:0019899,GO:0000082,GO:0045893,GO:0019904,GO:0000122,GO:0051152,GO:0005515	SUMO ligase activity|ubiquitin protein ligase binding|nucleus|protein-DNA complex assembly|positive regulation of proteasomal ubiquitin-dependent protein catabolic process|positive regulation of protein sumoylation|spermatogenesis|protein C-terminus binding|transcription factor binding|zinc ion binding|visual learning|PML body|regulation of cell proliferation|protein sumoylation|negative regulati…	rno04120,rno04630,rno05160	Ubiquitin mediated proteolysis|Jak-STAT signaling pathway|Hepatitis C
circRNA_6692|Chr8:96029825_96046465_-	2.034810277	4.069620555	0	0	#NAME?	0.017186515	1	Down	0.053865127	0.042923377	0.032965994	0	0	0	Chr8	-	96029825	96046465	16641	793	sense-overlapping	NM_001108174.1	Chr8:96018943_96088405_-	Snx14	GeneID:315871,Genbank:NM_001108174.1,RGD:1310921	sorting nexin 14	GO:0080025,GO:0097352,GO:0005764,GO:0005770,GO:0016021	phosphatidylinositol-3,5-bisphosphate binding|autophagosome maturation|lysosome|late endosome|integral component of membrane
circRNA_6735|Chr8:112777013_112778440_-	2.265430093	0	4.530860187	Inf	Inf	0.01047852	1	Up	0	0	0	0.084081796	0.031037274	0.04117553	Chr8	-	112777013	112778440	1428	268	sense-overlapping	XM_003750579.2	Chr8:112697907_112807630_-	Dnajc13	GeneID:363127,Genbank:XM_003750579.2,RGD:1308046	DnaJ heat shock protein family (Hsp40) member C13, transcript variant X1	GO:0005829,GO:0006898,GO:0007032,GO:0008150,GO:0010008,GO:0031901,GO:0043231,GO:0071203,GO:1902954,GO:2000641,GO:0003674,GO:0005575	cytosol|receptor-mediated endocytosis|endosome organization|biological_process|endosome membrane|early endosome membrane|intracellular membrane-bounded organelle|WASH complex|regulation of early endosome to recycling endosome transport|regulation of early endosome to late endosome transport|molecular_function|cellular_component
circRNA_6825|Chr9:2205172_2246426_+	6.291725244	10.56960112	2.013849366	0.190532201	-2.391893253	0.026988881	1	Down	0.053865127	0.096577599	0.186807299	0	0.062074549	0	Chr9	+	2205172	2246426	41255	1609	sense-overlapping	XM_006244221.3	Chr9:2181135_2277949_+	Satb1	GeneID:316164,Genbank:XM_006244221.3,RGD:1305561	SATB homeobox 1, transcript variant X5	GO:0050798,GO:0008544,GO:0001227,GO:0060004,GO:0016363,GO:0003677,GO:0016571,GO:0003682,GO:0003700,GO:0005634,GO:0005654,GO:0016604,GO:0005720,GO:0016605,GO:0006325,GO:0042110,GO:0006338,GO:0043367,GO:0006351,GO:0000122,GO:0043374,GO:0006355,GO:0000785,GO:0043565,GO:0006357,GO:0000977	activated T cell proliferation|epidermis development|transcriptional repressor activity, RNA polymerase II transcription regulatory region sequence-specific DNA binding|reflex|nuclear matrix|DNA binding|histone methylation|chromatin binding|DNA binding transcription factor activity|nucleus|nucleoplasm|nuclear body|nuclear heterochromatin|PML body|chromatin organization|T cell activation|chromatin…
circRNA_6844|Chr9:11209034_11219449_-	4.76273869	9.525477379	0	0	#NAME?	3.43E-05	0.069935123	Down	0.075411177	0.085846755	0.142852641	0	0	0	Chr9	-	11209034	11219449	10416	737	sense-overlapping	XM_017596273.1	Chr9:11165006_11219449_-	Uxs1	GeneID:246232,Genbank:XM_017596273.1,RGD:628680	UDP-glucuronate decarboxylase 1, transcript variant X6	GO:0032580,GO:0033320,GO:0042803,GO:0048040,GO:0051262,GO:0070403,GO:0005737,GO:0005794,GO:0016021	Golgi cisterna membrane|UDP-D-xylose biosynthetic process|protein homodimerization activity|UDP-glucuronate decarboxylase activity|protein tetramerization|NAD+ binding|cytoplasm|Golgi apparatus|integral component of membrane	rno00520	Amino sugar and nucleotide sugar metabolism
circRNA_7258|ChrX:137709443_137733342_-	1.883447142	3.766894283	0	0	#NAME?	0.025781709	1	Down	0.021546051	0.064385066	0.032965994	0	0	0	ChrX	-	137709443	137733342	23900	23900	intergenic
