# Supplementary material for: Comprehensive Analysis of the Profiles of Differentially Expressed mRNAs, lncRNAs, and circRNAs in Phosgene-Induced Acute Lung Injury
Source: Biomed Res Int. 2021 Jan 9;2021:6278526. doi: 10.1155/2021/6278526 (PMC7811572; doi:10.1155/2021/6278526)
Supplement: Supplementary 4 — Table S4: differentially expressed mRNAs between the B and C group. [file 6278526.f4.txt]

Table S4 Differentially expressed mRNAs between B and C group
gene_id	BaseMean	BaseMean_control_B	BaseMean_case_C	FoldChange	log2FoldChange	pValue	qValue	Regulation	Expression_B1	Expression_B2	Expression_B3	Expression_C1	Expression_C2	Expression_C3	Dbxref	product	GO_id	GO_term	pathway	pathway_description
Abhd10	6.066516288	11.12918822	1.003844362	0.090199244	-3.470740851	0.007529019	1	Down	0	0.0645639	0.00720333	0.00701575	0	0	GeneID:303953,Genbank:XM_008768732.2,RGD:1308084	abhydrolase domain containing 10	GO:0005829,GO:0019391,GO:0102390,GO:0004553,GO:0005739	cytosol|glucuronoside catabolic process|mycophenolic acid acyl-glucuronide esterase activity|hydrolase activity, hydrolyzing O-glycosyl compounds|mitochondrion
Adipoq	317.5875386	466.5193787	168.6556986	0.36151917	-1.467855945	0.00148719	1	Down	5.00235	6.36813	9.36872	2.79178	2.25067	2.69306	GeneID:246253,Genbank:NM_144744.3,RGD:628748	adiponectin, C1Q and collagen domain containing	GO:0050805,GO:0050873,GO:0051260,GO:0071944,GO:0051384,GO:0072659,GO:0051899,GO:0060081,GO:0090317,GO:1900121,GO:2000584,GO:1904706,GO:2000590,GO:1904753,GO:0005615,GO:0005783,GO:0006006,GO:0006635,GO:0010739,GO:0007584,GO:0010745,GO:0007623,GO:0010804,GO:0010875,GO:0031953,GO:0032270,GO:0010906,GO:0032720,GO:0032757,GO:0001666,GO:0034612,GO:0032869,GO:0001934,GO:0035690,GO:0005102,GO:0042493,GO:…	negative regulation of synaptic transmission|brown fat cell differentiation|protein homooligomerization|cell periphery|response to glucocorticoid|protein localization to plasma membrane|membrane depolarization|membrane hyperpolarization|negative regulation of intracellular protein transport|negative regulation of receptor binding|negative regulation of platelet-derived growth factor receptor-alph…	rno04152,rno04920,rno03320,rno04211,rno04930,rno04932	AMPK signaling pathway|Adipocytokine signaling pathway|PPAR signaling pathway|Longevity regulating pathway - mammal|Type II diabetes mellitus|Non-alcoholic fatty liver disease (NAFLD)
Agt	530.980456	727.7453993	334.2155127	0.459247854	-1.122655116	2.24E-05	0.104424193	Down	10.4743	7.12445	6.58207	3.07785	3.97401	3.86711	GeneID:24179,Genbank:XM_008772597.2,RGD:2069	angiotensinogen	GO:0070471,GO:0071260,GO:0090190,GO:0097755,GO:1900020,GO:1901201,GO:1903598,GO:1903779,GO:1904385,GO:1904707,GO:0002018,GO:0002019,GO:0002027,GO:0002035,GO:0003014,GO:0003051,GO:0007186,GO:0003331,GO:0004867,GO:0007202,GO:0005179,GO:0007204,GO:0007250,GO:0007565,GO:0007568,GO:0010666,GO:0007588,GO:0010873,GO:0008065,GO:0010951,GO:0008217,GO:0010976,GO:0014061,GO:0014068,GO:0001543,GO:0032930,GO:…	uterine smooth muscle contraction|cellular response to mechanical stimulus|positive regulation of branching involved in ureteric bud morphogenesis|positive regulation of blood vessel diameter|positive regulation of protein kinase C activity|regulation of extracellular matrix assembly|positive regulation of gap junction assembly|regulation of cardiac conduction|cellular response to angiotensin|pos…	rno04924,rno04614,rno04270,rno05410	Renin secretion|Renin-angiotensin system|Vascular smooth muscle contraction|Hypertrophic cardiomyopathy (HCM)
Car3	729.0364955	1092.041718	366.0312726	0.335180668	-1.576989153	0.001860048	1	Down	8.21084	17.5045	12.3082	3.99752	5.35467	3.57913	GeneID:54232,Genbank:XM_006232116.1,RGD:2241	carbonic anhydrase 3	GO:0006730,GO:0006979,GO:0008270,GO:0016151,GO:0016311,GO:0016791,GO:0045471,GO:0004089,GO:0005829	one-carbon metabolic process|response to oxidative stress|zinc ion binding|nickel cation binding|dephosphorylation|phosphatase activity|response to ethanol|carbonate dehydratase activity|cytosol	rno00910	Nitrogen metabolism
Cd209b	9.856793622	3.989974187	15.72361306	3.940780647	1.978481448	0.030665771	1	Up	0.0808341	0	0.111223	0.0780291	0.212374	0.220674	GeneID:288378,Genbank:NM_001170397.1,RGD:1561466	CD209b antigen	GO:0005537,GO:0006897,GO:0006910,GO:0009897,GO:0016021,GO:0016045,GO:0030247,GO:0042535,GO:0046718,GO:0048306,GO:0050766,GO:0001618,GO:0001872,GO:0001879	mannose binding|endocytosis|phagocytosis, recognition|external side of plasma membrane|integral component of membrane|detection of bacterium|polysaccharide binding|positive regulation of tumor necrosis factor biosynthetic process|viral entry into host cell|calcium-dependent protein binding|positive regulation of phagocytosis|virus receptor activity|(1->3)-beta-D-glucan binding|detection of yeast
Cd300lg	771.3726957	1134.586901	408.1584908	0.359741938	-1.474965738	0.004273207	1	Down	5.03459	3.44257	3.47272	2.92747	1.42997	0.0271649	GeneID:684984,Genbank:XM_003750936.4,RGD:1584376	Cd300 molecule-like family member G	GO:0016323,GO:0016324,GO:0001791,GO:0002414,GO:0016021	basolateral plasma membrane|apical plasma membrane|IgM binding|immunoglobulin transcytosis in epithelial cells|integral component of membrane
Cidec	294.1296236	396.8614663	191.397781	0.482278571	-1.052061385	0.003540625	1	Down	3.24003	5.02323	5.69899	1.87608	2.18334	2.73877	GeneID:500292,Genbank:NM_001244798.1,RGD:1562113	cell death-inducing DFFA-like effector c	GO:0005811,GO:0005829,GO:0006351,GO:0006355,GO:0006915,GO:0034389,GO:0042981,GO:0097194,GO:0005622,GO:0005634,GO:0005783	lipid droplet|cytosol|transcription, DNA-templated|regulation of transcription, DNA-templated|apoptotic process|lipid particle organization|regulation of apoptotic process|execution phase of apoptosis|intracellular|nucleus|endoplasmic reticulum
Clec18a	196.4069013	291.2042281	101.6095746	0.348928912	-1.518994951	0.001921734	1	Down	1.28373	0.831488	1.41866	0.771563	0.196968	0.239524	GeneID:307851,Genbank:XM_017601442.1,RGD:1559899	C-type lectin domain family 18, member A	GO:0030247,GO:0005615	polysaccharide binding|extracellular space
Cntn1	458.6896113	213.3257915	704.053431	3.300367133	1.722626519	0.030728001	1	Up	0.502617	0.891275	0.292185	2.0365	0.766569	2.97307	GeneID:117258,Genbank:XM_017594616.1,RGD:621300	contactin 1	GO:0007219,GO:0010628,GO:0010765,GO:0010976,GO:0021549,GO:0030246,GO:0031175,GO:0031225,GO:0043209,GO:0045121,GO:0050731,GO:0005515,GO:0005886,GO:0007155	Notch signaling pathway|positive regulation of gene expression|positive regulation of sodium ion transport|positive regulation of neuron projection development|cerebellum development|carbohydrate binding|neuron projection development|anchored component of membrane|myelin sheath|membrane raft|positive regulation of peptidyl-tyrosine phosphorylation|protein binding|plasma membrane|cell adhesion	rno04514	Cell adhesion molecules (CAMs)
Cttn	343.3651203	497.1142951	189.6159456	0.381433299	-1.390497299	0.033506816	1	Down	1.93776	1.03118	0.591262	0.100294	0.523521	0.934653	GeneID:60465,Genbank:XM_006230625.3,RGD:619839	cortactin	GO:0005884,GO:0005886,GO:0005905,GO:0005925,GO:0005938,GO:0006886,GO:0030838,GO:0006898,GO:0030863,GO:0006930,GO:0031532,GO:0043197,GO:0043231,GO:0045296,GO:0045987,GO:0048041,GO:0048812,GO:0001726,GO:0002102,GO:0005515,GO:0005522,GO:0005737,GO:0005794,GO:0005829,GO:0007420,GO:0008076,GO:0030027,GO:0030041,GO:0030054,GO:0048870,GO:0030426,GO:0070064,GO:0030516,GO:0071933,GO:0097062,GO:0097581,GO:…	actin filament|plasma membrane|clathrin-coated pit|focal adhesion|cell cortex|intracellular protein transport|positive regulation of actin filament polymerization|receptor-mediated endocytosis|cortical cytoskeleton|substrate-dependent cell migration, cell extension|actin cytoskeleton reorganization|dendritic spine|intracellular membrane-bounded organelle|cadherin binding|positive regulation of sm…	rno04530,rno05205,rno05100	Tight junction|Proteoglycans in cancer|Bacterial invasion of epithelial cells
Dgcr2	104.7098548	144.1299773	65.28973236	0.452992039	-1.142442398	0.00014264	0.481666129	Down	1.80305	0.207032	0.246741	0.3777	0.830431	0.485048	GeneID:360742,Genbank:NM_001012146.1,RGD:1310567	DiGeorge syndrome critical region gene 2	GO:0050890,GO:0016020,GO:0016021,GO:0042493	cognition|membrane|integral component of membrane|response to drug
Fabp4	678.4415173	936.277245	420.6057896	0.449232096	-1.154467087	0.019428697	1	Down	17.3909	13.0163	27.3443	7.01378	8.6606	9.50223	GeneID:79451,Genbank:NM_053365.1,RGD:69309	fatty acid binding protein 4	GO:0071285,GO:0045892,GO:0005504,GO:0050727,GO:0005515,GO:0071356,GO:0050729,GO:0005634,GO:0005811,GO:0005829,GO:0006469,GO:0006631,GO:0050872,GO:0008284,GO:0042493,GO:0050873,GO:0042632,GO:0001816,GO:0051384	cellular response to lithium ion|negative regulation of transcription, DNA-templated|fatty acid binding|regulation of inflammatory response|protein binding|cellular response to tumor necrosis factor|positive regulation of inflammatory response|nucleus|lipid droplet|cytosol|negative regulation of protein kinase activity|fatty acid metabolic process|white fat cell differentiation|positive regulatio…	rno04923,rno03320	Regulation of lipolysis in adipocyte|PPAR signaling pathway
Gys2	22.264228	35.2030879	9.325368091	0.264901991	-1.916469405	0.005438346	1	Down	0.21906	0.123094	0.292366	0.00758423	0.0872216	0.0990868	GeneID:25623,Genbank:NM_013089.2,RGD:2773	glycogen synthase 2	GO:0030864,GO:0004373,GO:0043265,GO:0005536,GO:0005737,GO:0005829,GO:0005856,GO:0005938,GO:0005977,GO:0005978,GO:0009749	cortical actin cytoskeleton|glycogen (starch) synthase activity|ectoplasm|glucose binding|cytoplasm|cytosol|cytoskeleton|cell cortex|glycogen metabolic process|glycogen biosynthetic process|response to glucose	rno00500,rno04151,rno04152,rno04910,rno04922,rno04931	Starch and sucrose metabolism|PI3K-Akt signaling pathway|AMPK signaling pathway|Insulin signaling pathway|Glucagon signaling pathway|Insulin resistance
Klb	14.80078241	24.52342209	5.078142732	0.207073169	-2.271787462	0.002070246	1	Down	0.137697	0.0989343	0.13572	0.0153674	0.0163509	0.0501921	GeneID:289625,Genbank:XM_017599543.1,RGD:1308227	klotho beta	GO:0008284,GO:0008543,GO:0017042,GO:0017134,GO:0046477,GO:0090080,GO:0004565,GO:0005104,GO:0005829	positive regulation of cell proliferation|fibroblast growth factor receptor signaling pathway|glycosylceramidase activity|fibroblast growth factor binding|glycosylceramide catabolic process|positive regulation of MAPKKK cascade by fibroblast growth factor receptor signaling pathway|beta-galactosidase activity|fibroblast growth factor receptor binding|cytosol	rno04714	Thermogenesis
LOC100910501	33.41314345	60.37680697	6.449479926	0.106820487	-3.226739728	0.022406657	1	Down	0	0	0	0	0	0	GeneID:100910501,Genbank:XM_008761484.2,RGD:6498411	glutamyl aminopeptidase-like
LOC100910575	80.4065665	151.9974409	8.815692125	0.057998951	-4.107829383	0.011762333	1	Down	2.95855	3.93744	0.125927	0.0767515	0.065448	0.167023	GeneID:100910575,Genbank:XM_003749864.4,RGD:6498120	serine-threonine kinase receptor-associated protein-like
LOC100910669	28.67273019	18.54124862	38.80421177	2.092858608	1.065474847	0.039094377	1	Up	0.12555	0.0491542	0.147343	0.219844	0.254686	0.239072	GeneID:100910669,Genbank:XM_008769106.2,RGD:6497409	paired immunoglobulin-like type 2 receptor alpha-like	GO:0042288,GO:0007165,GO:0007169,GO:0016021	MHC class I protein binding|signal transduction|transmembrane receptor protein tyrosine kinase signaling pathway|integral component of membrane
LOC100911825	26.85856438	17.53915418	36.17797459	2.062697791	1.044532465	0.047298602	1	Up	0.856543	0.592419	0.447994	0.76268	0.525461	0.815789	GeneID:100911825,Genbank:XM_008769777.2,RGD:6490558	low affinity immunoglobulin gamma Fc region receptor III-like	GO:0016021,GO:0038094	integral component of membrane|Fc-gamma receptor signaling pathway
LOC100911865	10.58332792	16.13206211	5.034593736	0.312086186	-1.679983595	0.047251976	1	Down	0.227845	0.0864106	0.130233	0.0340021	0.10166	0.0276739	GeneID:100911865,Genbank:XM_003749100.4,RGD:6490058	TBC1 domain family member 12-like
LOC103690014	6.345789465	0.997703139	11.69387579	11.72079684	3.550998749	0.037419933	1	Up	0	0.016615	0	0.146558	0	0.142702	GeneID:103690014,Genbank:XM_017595312.1,RGD:9270228	rac GTPase-activating protein 1-like
LOC103690317	69.49697081	104.5877008	34.40624085	0.328970238	-1.603971025	0.000565544	1	Down	1.11288	0.709207	1.28362	0.583062	0.471555	0.681702	GeneID:103690317,Genbank:XM_008765854.2,RGD:9332946	KAT8 regulatory NSL complex subunit 2	GO:0043982,GO:0043984,GO:0043995,GO:0043996,GO:0046972,GO:0000123,GO:0043981	histone H4-K8 acetylation|histone H4-K16 acetylation|histone acetyltransferase activity (H4-K5 specific)|histone acetyltransferase activity (H4-K8 specific)|histone acetyltransferase activity (H4-K16 specific)|histone acetyltransferase complex|histone H4-K5 acetylation
LOC103690914	37.288663	61.44537049	13.13195552	0.213717574	-2.226222549	0.023321305	1	Down	0.188932	0.0484358	0.0244479	0.0480798	0.0867396	0.0260432	GeneID:103690914,Genbank:XM_017589811.1,RGD:9213653	zinc finger protein 431-like
LOC108348184	75.76156385	118.5679074	32.95522034	0.277943847	-1.847134649	1.62E-07	0.001194035	Down	0.762415	0.857449	0.916541	0.231095	0.219699	0.216868	GeneID:108348184,Genbank:XM_017597785.1	pyridoxal-dependent decarboxylase domain-containing protein 1-like
LOC691320	7.099518097	1.630422747	12.56861345	7.708806484	2.946507512	0.011190168	1	Up	0.0332849	0.0219037	0	0.042806	0.0785263	0.174949	GeneID:691320,Genbank:XM_006241045.1,RGD:1585095	similar to cytochrome P450 4F1
Lkaaear1	23.48380387	32.21723083	14.75037691	0.45784124	-1.127080676	0.045368274	1	Down	0.429643	0.32083	0.507244	0.201561	0.225503	0.182503	GeneID:296483,Genbank:XM_006235764.3,RGD:1306208	LKAAEAR motif containing 1
Mpo	14.28705157	21.58433904	6.989764105	0.323834985	-1.626669242	0.026786309	1	Down	0.173386	0.0941472	0.178803	0.0667784	0.034504	0.0454006	GeneID:303413,Genbank:NM_001107036.1,RGD:1592081	myeloperoxidase	GO:0044130,GO:0020037,GO:0004601,GO:0050830,GO:0030141,GO:0050832,GO:0032094,GO:0055114,GO:0005615,GO:0005634,GO:0032496,GO:0005737,GO:1990268,GO:0034374,GO:0006979,GO:0042582,GO:0007568,GO:0042742,GO:0008201,GO:0001878,GO:0042744,GO:0009612,GO:0002149,GO:0043231,GO:0019430,GO:0002679	negative regulation of growth of symbiont in host|heme binding|peroxidase activity|defense response to Gram-positive bacterium|secretory granule|defense response to fungus|response to food|oxidation-reduction process|extracellular space|nucleus|response to lipopolysaccharide|cytoplasm|response to gold nanoparticle|low-density lipoprotein particle remodeling|response to oxidative stress|azurophil …	rno00983,rno04145,rno05202,rno05221	Drug metabolism - other enzymes|Phagosome|Transcriptional misregulation in cancers|Acute myeloid leukemia
Ndufa10l1	115.1003811	58.49753195	171.7032303	2.935221788	1.553469519	1.92E-07	0.001194035	Up	0.755307	0.850034	1.01649	2.67144	2.35658	2.75088	GeneID:316632,Genbank:NM_182671.2,RGD:1589745	NADH dehydrogenase (ubiquinone) 1 alpha subcomplex 10-like 1	GO:0006120,GO:0032981,GO:0005747,GO:0005759	mitochondrial electron transport, NADH to ubiquinone|mitochondrial respiratory chain complex I assembly|mitochondrial respiratory chain complex I|mitochondrial matrix	rno00190,rno04723,rno04714,rno05010,rno05012,rno05016,rno04932	Oxidative phosphorylation|Retrograde endocannabinoid signaling|Thermogenesis|Alzheimer's disease|Parkinson's disease|Huntington's disease|Non-alcoholic fatty liver disease (NAFLD)
Pddc1	42.2007755	11.25682881	73.14472219	6.497808881	2.699953311	8.03E-09	0.000149836	Up	0.465501	0.486974	0.269444	1.60067	1.34094	1.96522	GeneID:309110,Genbank:XM_017589232.1,RGD:1304836	Parkinson disease 7 domain containing 1
Plin1	225.578676	338.1848233	112.9725286	0.334055584	-1.581839921	0.02337637	1	Down	2.20084	2.07585	4.79777	0.819807	1.11199	1.18692	GeneID:25629,Genbank:XM_008759499.2,RGD:3351	perilipin 1	GO:0005811,GO:0005829,GO:0008150,GO:0016042,GO:0003674,GO:0005783	lipid droplet|cytosol|biological_process|lipid catabolic process|molecular_function|endoplasmic reticulum	rno04371,rno04923,rno03320,rno04714	Apelin signaling pathway|Regulation of lipolysis in adipocyte|PPAR signaling pathway|Thermogenesis
Pnpla3	58.94853806	80.27206686	37.62500927	0.468718581	-1.093206107	0.004241254	1	Down	0.630482	0.336939	0.479422	0.183831	0.153008	0.323793	GeneID:362972,Genbank:XM_017594995.1,RGD:1595843	patatin-like phospholipase domain containing 3	GO:0034389,GO:0004623,GO:0035727,GO:0004806,GO:0036042,GO:0005737,GO:0005811,GO:0006650,GO:0036153,GO:0006654,GO:0042171,GO:0016020,GO:0051264,GO:0051265,GO:0019432,GO:0001676,GO:0055088,GO:0019433,GO:0002021,GO:0003824	lipid particle organization|phospholipase A2 activity|lysophosphatidic acid binding|triglyceride lipase activity|long-chain fatty acyl-CoA binding|cytoplasm|lipid droplet|glycerophospholipid metabolic process|triglyceride acyl-chain remodeling|phosphatidic acid biosynthetic process|lysophosphatidic acid acyltransferase activity|membrane|mono-olein transacylation activity|diolein transacylation ac…	rno00561	Glycerolipid metabolism
Prr32	11.39602438	20.73184168	2.060207077	0.09937405	-3.330987023	0.029840903	1	Down	0.314002	0.108654	0.671432	0.0179198	0.0565604	0.0195355	GeneID:683753,Genbank:XM_002728150.5,RGD:1583341	proline rich 32
RGD1561143	18.74131429	6.354755292	31.12787328	4.898359079	2.292298536	0.000787929	1	Up	0.0313399	0.0921827	0.0718091	0.271346	0.127634	0.229089	GeneID:304382,Genbank:XM_006249193.2,RGD:1561143	similar to cell surface receptor FDFACT	GO:0007169,GO:0016021,GO:0042288	transmembrane receptor protein tyrosine kinase signaling pathway|integral component of membrane|MHC class I protein binding
RGD1561730	57.91545157	81.84184981	33.98905333	0.415301626	-1.267768573	0.049210978	1	Down	0.274082	0.316747	0.117126	0.00715246	0.133686	0.155378	GeneID:498169,Genbank:XM_017598609.1,RGD:1561730	similar to cell surface receptor FDFACT	GO:0016021	integral component of membrane
Retn	74.923395	106.5931011	43.25368893	0.405783193	-1.301218982	0.000154818	0.481666129	Down	5.05029	4.85483	6.29477	1.98368	2.06713	2.09252	GeneID:246250,Genbank:NM_144741.1,RGD:628781	resistin	GO:2000872,GO:0005615,GO:0005634,GO:0007568,GO:0009612,GO:0010469,GO:0010714,GO:0014911,GO:0032868,GO:0045444,GO:0048661,GO:0005179,GO:0050806,GO:0005576,GO:2000252	positive regulation of progesterone secretion|extracellular space|nucleus|aging|response to mechanical stimulus|regulation of signaling receptor activity|positive regulation of collagen metabolic process|positive regulation of smooth muscle cell migration|response to insulin|fat cell differentiation|positive regulation of smooth muscle cell proliferation|hormone activity|positive regulation of sy…
Rpl39l	9.821097063	3.579400948	16.06279318	4.487564655	2.165932725	0.018822299	1	Up	0.38406	0	0.0544043	0.606016	1.12993	0.40441	GeneID:497860,Genbank:NM_001195471.1,RGD:1561345	ribosomal protein L39-like	GO:0007283,GO:0022625,GO:0003723,GO:0003735,GO:0006412	spermatogenesis|cytosolic large ribosomal subunit|RNA binding|structural constituent of ribosome|translation	rno03010	Ribosome
Rprml	55.72147835	32.68977466	78.75318203	2.409107522	1.268498785	0.011084575	1	Up	1.16841	0.375814	2.08547	2.67901	3.23342	2.19283	GeneID:685826,Genbank:NM_001109481.1,RGD:1589060	reprimo-like	GO:0016021	integral component of membrane
Slc36a2	35.1223422	50.37901834	19.86566607	0.394324199	-1.342545845	0.008716306	1	Down	0.287945	0.435144	0.695505	0.159191	0.200058	0.242342	GeneID:246235,Genbank:NM_139339.1,RGD:620492	solute carrier family 36 member 2	GO:0070881,GO:0015816,GO:0015187,GO:0005280,GO:1900925,GO:0005302,GO:1902600,GO:0015824,GO:0015193,GO:0005774,GO:0016021,GO:0005886,GO:0010155,GO:0015078,GO:0015171,GO:0032973,GO:0015180,GO:0035524,GO:0015808,GO:0003333	regulation of proline transport|glycine transport|glycine transmembrane transporter activity|amino acid:proton symporter activity|positive regulation of glycine import across plasma membrane|L-tyrosine transmembrane transporter activity|proton transmembrane transport|proline transport|L-proline transmembrane transporter activity|vacuolar membrane|integral component of membrane|plasma membrane|reg…
Thrsp	703.1192024	1082.607145	323.6312599	0.298936933	-1.742086944	0.044736066	1	Down	18.8175	7.28705	30.8731	3.63602	5.27184	8.69504	GeneID:25357,Genbank:NM_012703.2,RGD:3859	thyroid hormone responsive	GO:0046890,GO:0005829,GO:0006351,GO:0006355,GO:0006629,GO:0010866,GO:0042802,GO:0042803,GO:0005634,GO:0005654	regulation of lipid biosynthetic process|cytosol|transcription, DNA-templated|regulation of transcription, DNA-templated|lipid metabolic process|regulation of triglyceride biosynthetic process|identical protein binding|protein homodimerization activity|nucleus|nucleoplasm
Tnni3k	41.60267975	27.67254256	55.53281694	2.006784046	1.004885374	0.020195494	1	Up	0.0755711	0.0785276	0.120051	0.169981	0.145513	0.197902	GeneID:295531,Genbank:XM_008761563.2,RGD:727908	TNNI3 interacting kinase	GO:0055117,GO:0005737,GO:0002027,GO:0086069,GO:0006468,GO:0004672,GO:1903779,GO:0004674,GO:0004871,GO:0005524,GO:0008022,GO:0005634,GO:0031013,GO:0035556,GO:0046872	regulation of cardiac muscle contraction|cytoplasm|regulation of heart rate|bundle of His cell to Purkinje myocyte communication|protein phosphorylation|protein kinase activity|regulation of cardiac conduction|protein serine/threonine kinase activity|signal transducer activity|ATP binding|protein C-terminus binding|nucleus|troponin I binding|intracellular signal transduction|metal ion binding
Troap	22.11779967	12.95529018	31.28030916	2.414481555	1.271713442	0.026433295	1	Up	0.0594346	0.165027	0.0580663	0.316302	0.167145	0.147123	GeneID:300219,Genbank:XM_006257348.3,RGD:1306870	trophinin associated protein
Zfp420	9.998929355	0.672733711	19.325125	28.72626225	4.844298382	0.004638356	1	Up	0	0	0	0.0146738	0.0696829	0.00798694	GeneID:100359464,Genbank:XM_002728737.5,RGD:2323829	zinc finger protein 420	GO:0005575,GO:0005634,GO:0006355,GO:0008150,GO:0003674,GO:0003676,GO:0003700	cellular_component|nucleus|regulation of transcription, DNA-templated|biological_process|molecular_function|nucleic acid binding|DNA binding transcription factor activity
