# Supplementary material for: Comprehensive Analysis of the Profiles of Differentially Expressed mRNAs, lncRNAs, and circRNAs in Phosgene-Induced Acute Lung Injury
Source: Biomed Res Int. 2021 Jan 9;2021:6278526. doi: 10.1155/2021/6278526 (PMC7811572; doi:10.1155/2021/6278526)
Supplement: Supplementary 5 — Table S5: differentially expressed lncRNAs between the B and C group. [file 6278526.f5.txt]

Table S5 Differentially expressed lncRNAs between B and C group
lncRNA_id	BaseMean	BaseMean_control_B	BaseMean_case_C	FoldChange	log2FoldChange	pValue	qValue	Regulation	Expression_B1	Expression_B2	Expression_B3	Expression_C1	Expression_C2	Expression_C3	Chrom	Start	End	Strand	lncRNA_symbol	partnerRNA_transcript	distance	direction	type	location	subtype	partnerRNA_gene	Dbxref	product	GO_id	GO_term	pathway	pathway_description
ENSRNOT00000025795	139.9968731	65.01158362	214.9821627	3.306828579	1.72544826	0.006020025	1	Up	0.4699486	0.4918587	0.3781375	1.71843	1.081663	1.735081	Chr1	41905436	41938439	-	AABR07001382.1	XM_017590500.1	0	sense	genic	exonic	nested	Syne1	GeneID:499010,Genbank:XM_017590500.1,RGD:620546	spectrin repeat containing nuclear envelope protein 1, transcript variant X1	GO:0005654,GO:0005730,GO:0005737,GO:0005794,GO:0005819,GO:0007030,GO:0042803,GO:0007097,GO:0043197,GO:0007420,GO:0044327,GO:0009416,GO:0045211,GO:0048260,GO:0048471,GO:0048814,GO:0051015,GO:0051642,GO:0055007,GO:0000932,GO:0002053,GO:0003779,GO:0005102,GO:0005198,GO:0005515,GO:0005521,GO:0005635,GO:0016021,GO:0019899,GO:0030017,GO:0030496,GO:0031965,GO:0061886,GO:0034993,GO:0090286,GO:0042692,GO:…	nucleoplasm|nucleolus|cytoplasm|Golgi apparatus|spindle|Golgi organization|protein homodimerization activity|nuclear migration|dendritic spine|brain development|dendritic spine head|response to light stimulus|postsynaptic membrane|positive regulation of receptor-mediated endocytosis|perinuclear region of cytoplasm|regulation of dendrite morphogenesis|actin filament binding|centrosome localization…
ENSRNOT00000076115	15.49567697	27.27272501	3.718628935	0.136349739	-2.874616157	0.003003857	1	Down	0.5860226	0.2105383	0.6065515	1.65E-12	1.38E-05	0.2022775	ChrX	73424922	73427948	+	LOC103694491	XM_008773326.2	0	sense	genic	exonic	nested	LOC103694491	GeneID:103694491,Genbank:XM_008773326.2,RGD:9296500	uncharacterized protein MGC39606 homolog
ENSRNOT00000076236	54.34179111	15.96173674	92.72184548	5.809007316	2.538291647	0.000327906	0.627124856	Up	1.549335	0.396242	0.000160051	2.533946	4.720037	5.076503	Chr7	116373323	116376897	-	AABR07058441.1	XM_017595247.1	0	sense	genic	exonic	nested	LOC300024	GeneID:300024,Genbank:XM_017595247.1,RGD:1586182	similar to Ly6-B antigen gene, transcript variant X1
ENSRNOT00000076363	17.58110019	2.204940909	32.95725947	14.94700349	3.901784383	0.016131972	1	Up	0.07012549	0.7242589	1.09E-13	0.3663893	6.529646	5.115675	Chr1	135135833	135162693	+	AABR07004272.1	XM_017590163.1	0	sense	genic	exonic	nested	Fam174b	GeneID:681398,Genbank:XM_017590163.1,RGD:1596692	family with sequence similarity 174, member B, transcript variant X1	GO:0016021	integral component of membrane
ENSRNOT00000077086	32.72402734	16.27184386	49.17621081	3.022165848	1.595582834	0.028889719	1	Up	0.1927649	0.08725057	0.06399082	0.5327922	0.1871742	0.4082963	Chr1	131380879	131431948	-	AABR07004228.1	XM_006229366.3	15723	sense	intergenic	downstream	same_strand	Nr2f2	GeneID:113984,Genbank:XM_006229366.3,RGD:69305	nuclear receptor subfamily 2, group F, member 2, transcript variant X1	GO:0003677,GO:0003700,GO:0003707,GO:0004879,GO:0008270,GO:0005515,GO:0009566,GO:0005634,GO:0009952,GO:0009956,GO:0010596,GO:0030522,GO:0030900,GO:0060849,GO:0032355,GO:0042803,GO:0043401,GO:0000122,GO:0001701,GO:0001764,GO:0001893,GO:0001937,GO:0001945,GO:0001972,GO:0003084,GO:0005654,GO:0005829,GO:0006351,GO:0006355,GO:0043565,GO:0006357,GO:0045736,GO:0007519,GO:0045892,GO:0045893,GO:0048514,GO:…	DNA binding|DNA binding transcription factor activity|steroid hormone receptor activity|nuclear receptor activity|zinc ion binding|protein binding|fertilization|nucleus|anterior/posterior pattern specification|radial pattern formation|negative regulation of endothelial cell migration|intracellular receptor signaling pathway|forebrain development|regulation of transcription involved in lymphatic e…
ENSRNOT00000077198	4.721133161	0	9.442266322	Inf	Inf	0.008618628	1	Up	7.48E-27	5.96E-10	3.92E-12	4.34E-05	1.240059	1.189485	Chr20	4426982	4428527	-	AABR07044388.3	NM_001013197.2	0	sense	genic	intronic	nested	Stk19	GeneID:361800,Genbank:NM_001013197.2,RGD:1359601	serine/threonine kinase 19	GO:0016607	nuclear speck
ENSRNOT00000077381	48.47163315	11.73500043	85.20826588	7.261036453	2.860175496	0.01244423	1	Up	0.02318765	0.06010929	0.3994099	2.042322	0.4873907	0.9561492	Chr12	21366528	21373076	-	AABR07035717.1	XM_017598613.1	3609	sense	intergenic	upstream	same_strand	LOC108348155	GeneID:108348155,Genbank:XM_017598613.1	paired immunoglobulin-like type 2 receptor beta-2, transcript variant X1	GO:0007169,GO:0016021,GO:0042288	transmembrane receptor protein tyrosine kinase signaling pathway|integral component of membrane|MHC class I protein binding
ENSRNOT00000077804	3.953105168	0	7.906210335	Inf	Inf	0.00696797	1	Up	3.00E-23	6.52E-24	0.000407219	0.1568045	0.05836049	0.3452211	Chr1	278476630	278480271	-	AABR07007055.1	XM_006231658.3	0	sense	genic	exonic	overlapping	LOC100911751	GeneID:100911751,Genbank:XM_006231658.3,RGD:6490816	GDNF family receptor alpha-1-like, transcript variant X1
ENSRNOT00000079914	3.875212401	0	7.750424802	Inf	Inf	0.033470375	1	Up	2.91E-13	8.26E-21	2.61E-13	1.82E-08	0.1736371	0.07297223	Chr9	119947852	119952156	+	AABR07068799.1	XM_017596501.1	0	sense	genic	exonic	nested	Mettl4	GeneID:316731,Genbank:XM_017596501.1,RGD:1306451	methyltransferase like 4, transcript variant X2	GO:0009007,GO:0032775,GO:0003676,GO:0005634,GO:0008168	site-specific DNA-methyltransferase (adenine-specific) activity|DNA methylation on adenine|nucleic acid binding|nucleus|methyltransferase activity
ENSRNOT00000081264	12.78556549	0.309707844	25.26142313	81.56533208	6.349884185	0.000356361	0.627124856	Up	9.32E-05	0.04680826	0.000147526	1.277212	0.168183	1.328557	Chr3	17648356	17649526	+	AABR07051592.1
ENSRNOT00000082248	12.80039654	25.60079308	0	0	#NAME?	0.013228412	1	Down	1.313987	6.495234	0.5642167	3.34E-14	4.17E-13	8.73E-08	Chr1	51525068	51525579	-	AABR07001555.1	NM_001106208.2	94296	antisense	intergenic	upstream	divergent	Pabpc6	GeneID:292295,Genbank:NM_001106208.2,RGD:1311201	poly(A) binding protein, cytoplasmic 6	GO:0005737,GO:0005829,GO:0008143	cytoplasm|cytosol|poly(A) binding	rno03013,rno03015,rno03018	RNA transport|mRNA surveillance pathway|RNA degradation
ENSRNOT00000085034	4.191884055	0.316435784	8.067332327	25.49437433	4.672107028	0.02020181	1	Up	7.96E-23	4.48E-21	0.08133624	0.07652102	0.6276741	0.7276722	Chr19	38365475	38370332	-	AABR07043748.2	XM_008772561.2	0	sense	genic	exonic	nested	LOC103690129	GeneID:103690129,Genbank:XM_008772561.2,RGD:9466589	NEDD4-like E3 ubiquitin-protein ligase WWP2, transcript variant X2
ENSRNOT00000089440	12.07814833	24.15629666	0	0	#NAME?	0.027514626	1	Down	0.7418116	4.18E-10	3.432195	1.06E-09	2.71E-13	9.68E-05	Chr2	156399129	156406032	-	AABR07010986.1	XM_008761069.1	0	sense	genic	exonic	nested	LOC103691573	GeneID:103691573,Genbank:XM_008761069.1,RGD:9321667	uncharacterized LOC103691573, transcript variant X1
ENSRNOT00000089565	6.063250203	0	12.12650041	Inf	Inf	0.042871938	1	Up	3.73E-13	4.16E-21	2.87E-21	3.68E-09	1.080511	0.3367541	Chr4	180141986	180153906	-	LOC100912509	XM_006237675.2	0	sense	genic	exonic	nested	LOC100912509	GeneID:100912509,Genbank:XM_006237675.2,RGD:6486776	intermediate filament tail domain-containing protein 1-like	GO:0008283,GO:0005634,GO:0005635,GO:0005737	cell proliferation|nucleus|nuclear envelope|cytoplasm
ENSRNOT00000089581	6.01726401	12.03452802	0	0	#NAME?	0.036201136	1	Down	0.2826701	1.224074	0.04390256	5.60E-05	1.33E-05	5.48E-05	Chr18	31295425	31305937	-	AABR07031740.1	XM_017601102.1	24144	sense	intergenic	downstream	same_strand	Pcdh1	GeneID:307481,Genbank:XM_017601102.1,RGD:1308490	protocadherin 1, transcript variant X1	GO:0043231,GO:0005634,GO:0005730,GO:0030054	intracellular membrane-bounded organelle|nucleus|nucleolus|cell junction
ENSRNOT00000089756	3.46203897	0	6.92407794	Inf	Inf	0.024594621	1	Up	0.008312151	5.44E-10	0.006937772	0.3458775	0.04999678	0.8751571	Chr17	21292934	21295203	-	AABR07027254.1	NM_001135576.2	39786	sense	intergenic	downstream	same_strand	Smim13	GeneID:690806,Genbank:NM_001135576.2,RGD:1591023	small integral membrane protein 13	GO:0016021	integral component of membrane
ENSRNOT00000090095	33.61257658	0	67.22515316	Inf	Inf	0.019534305	1	Up	0	1.30E-10	5.07E-12	1.17E-06	2.395564	13.76948	Chr6	133667975	133676907	+	AABR07065531.5	XM_017594511.1	33300	antisense	intergenic	downstream	convergent	Rtl1	GeneID:108351300,Genbank:XM_017594511.1	retrotransposon-like 1
ENSRNOT00000090134	3.598643875	7.197287749	0	0	#NAME?	0.011352509	1	Down	1.06E-25	0.412654	0.3917739	8.84E-21	1.46E-22	2.29E-25	Chr7	22495523	22497727	-	AABR07056330.1
ENSRNOT00000092811	4.727355722	0	9.454711444	Inf	Inf	0.04360357	1	Up	3.99E-17	7.36E-19	7.71E-21	1.22E-17	0.3107398	1.014374	Chr7	102648881	102791155	+	AABR07058158.1	NM_012603.2	57641	sense	intergenic	downstream	same_strand	Myc	GeneID:24577,Genbank:NM_012603.2,RGD:3130	myelocytomatosis oncogene	GO:0043066,GO:0043085,GO:0043279,GO:0043280,GO:0000987,GO:0001077,GO:0043388,GO:0001541,GO:0043473,GO:0001658,GO:0045787,GO:0043565,GO:0045821,GO:0044195,GO:0001701,GO:0045893,GO:0044330,GO:0001783,GO:0005634,GO:0002053,GO:0045944,GO:0002082,GO:0050910,GO:0046325,GO:0005635,GO:0051276,GO:0046722,GO:0005654,GO:0046982,GO:0051782,GO:0006352,GO:0006355,GO:0005719,GO:0051973,GO:0005730,GO:0060070,GO:…	negative regulation of apoptotic process|positive regulation of catalytic activity|response to alkaloid|positive regulation of cysteine-type endopeptidase activity involved in apoptotic process|proximal promoter sequence-specific DNA binding|transcriptional activator activity, RNA polymerase II proximal promoter sequence-specific DNA binding|positive regulation of DNA binding|ovarian follicle dev…	rno04010,rno04012,rno04310,rno04350,rno04390,rno04630,rno04151,rno04110,rno04218,rno04550,rno04919,rno05200,rno05230,rno05202,rno05206,rno05205,rno05210,rno05225,rno05226,rno05216,rno05221,rno05220,rno05219,rno05213,rno05224,rno05222,rno05166,rno05161,rno05167,rno05169	MAPK signaling pathway|ErbB signaling pathway|Wnt signaling pathway|TGF-beta signaling pathway|Hippo signaling pathway|Jak-STAT signaling pathway|PI3K-Akt signaling pathway|Cell cycle|Cellular senescence|Signaling pathways regulating pluripotency of stem cells|Thyroid hormone signaling pathway|Pathways in cancer|Central carbon metabolism in cancer|Transcriptional misregulation in cancers|MicroRNA…
NR_027324.1	108.5934943	21.70875062	195.4782379	9.004582589	3.170659401	0.042475615	1	Up	0.3397317	0.4458497	0.2576307	0.1940406	5.704865	3.55733	Chr1	215744404	215747080	-	H19	XM_008760183.2	82	antisense	intergenic	upstream	divergent	LOC102547221	GeneID:102547221,Genbank:XM_008760183.2,RGD:7730578	uncharacterized LOC102547221, transcript variant X4
NR_036653.1	20.51643214	33.53034503	7.502519253	0.223753118	-2.160020307	0.013246305	1	Down	11.23112	8.392978	4.639693	2.189977	1.922375	1.602633	Chr1	218075359	218075511	+	Bc1	NM_001107565.1	484	sense	intergenic	upstream	same_strand	Oraov1	GeneID:309136,Genbank:NM_001107565.1,RGD:1304637	oral cancer overexpressed 1	GO:0006289,GO:0008150,GO:0030896,GO:0031573,GO:0033314,GO:0035861,GO:0044778,GO:0000724,GO:0003674,GO:0005575	nucleotide-excision repair|biological_process|checkpoint clamp complex|intra-S DNA damage checkpoint|mitotic DNA replication checkpoint|site of double-strand break|meiotic DNA integrity checkpoint|double-strand break repair via homologous recombination|molecular_function|cellular_component
TCONS_00000064	11.90524988	23.47244258	0.338057176	0.014402301	-6.117556897	0.000815821	1	Down	1.322839	1.695505	0.1710051	0.000385871	1.53E-05	0.04399042	Chr1	11905594	11971362	+	XLOC_000032	NM_001025002.1	0	antisense	genic	intronic	containing	LOC310926	GeneID:310926,Genbank:NM_001025002.1,RGD:1560890	hypothetical protein LOC310926
TCONS_00003218	86.16198306	38.34950391	133.9744622	3.493512263	1.804678205	0.006973099	1	Up	7.15E-09	1.47376	3.256302	7.001818	4.335724	4.55099	Chr1	90200821	90251549	-	XLOC_001357	XM_006228856.2	0	sense	genic	exonic	containing	Lsm14a	GeneID:361554,Genbank:XM_006228856.2,RGD:1305695	LSM14A mRNA processing body assembly factor, transcript variant X2	GO:0003727,GO:0005737,GO:0005829,GO:0010494,GO:0033962,GO:0036464,GO:0039529,GO:0051607,GO:0060340,GO:0000932,GO:0003690,GO:0003725	single-stranded RNA binding|cytoplasm|cytosol|cytoplasmic stress granule|cytoplasmic mRNA processing body assembly|cytoplasmic ribonucleoprotein granule|RIG-I signaling pathway|defense response to virus|positive regulation of type I interferon-mediated signaling pathway|P-body|double-stranded DNA binding|double-stranded RNA binding
TCONS_00004008	5.992614607	0	11.98522921	Inf	Inf	0.006073747	1	Up	0.000324182	0.003404701	2.59E-05	1.257099	1.535332	3.26E-17	Chr1	199844051	199914151	-	XLOC_001734	XM_017589419.1	0	sense	genic	intronic	containing	Tial1	GeneID:361655,Genbank:XM_017589419.1,RGD:1595845	Tia1 cytotoxic granule-associated RNA binding protein-like 1, transcript variant X6	GO:0005634,GO:0005737,GO:0007281,GO:0008150,GO:0008284,GO:0010494,GO:0017091,GO:0017145,GO:0003674,GO:0003677	nucleus|cytoplasm|germ cell development|biological_process|positive regulation of cell proliferation|cytoplasmic stress granule|AU-rich element binding|stem cell division|molecular_function|DNA binding
TCONS_00005424	14.28369576	1.659497225	26.90789429	16.21448586	4.019211374	0.000212446	0.623104136	Up	0.1685081	0.1296557	1.01E-12	1.564679	2.504163	1.149475	Chr10	55661994	55679400	+	XLOC_002343	NM_012663.2	0	sense	genic	exonic	overlapping	Vamp2	GeneID:24803,Genbank:NM_012663.2,RGD:3949	vesicle-associated membrane protein 2	GO:0005802,GO:0005886,GO:0006887,GO:0006906,GO:0008021,GO:0017157,GO:0008022,GO:0008076,GO:0009749,GO:0019905,GO:0030054,GO:0030136,GO:0031982,GO:0032869,GO:0030141,GO:0035493,GO:0042589,GO:0042802,GO:0043001,GO:0043005,GO:0000149,GO:0060627,GO:0043195,GO:0061025,GO:0043229,GO:0065003,GO:0043231,GO:0070032,GO:0000322,GO:0070033,GO:0005484,GO:0070044,GO:0005515,GO:0005516,GO:0005543,GO:0070254,GO:…	trans-Golgi network|plasma membrane|exocytosis|vesicle fusion|synaptic vesicle|regulation of exocytosis|protein C-terminus binding|voltage-gated potassium channel complex|response to glucose|syntaxin binding|cell junction|clathrin-coated vesicle|vesicle|cellular response to insulin stimulus|secretory granule|SNARE complex assembly|zymogen granule membrane|identical protein binding|Golgi to plasma…	rno04130,rno04911,rno04970,rno04962,rno04721	SNARE interactions in vesicular transport|Insulin secretion|Salivary secretion|Vasopressin-regulated water reabsorption|Synaptic vesicle cycle
TCONS_00005944	72.29578457	121.9977563	22.59381283	0.185198593	-2.432854956	0.049945705	1	Down	7.760587	10.57546	1.26701	3.69255	0.03417156	8.39E-09	Chr10	84635216	84677044	+	XLOC_002545	XM_006247234.3	0	sense	genic	exonic	overlapping	Cbx1	GeneID:360609,Genbank:XM_006247234.3,RGD:1310714	chromobox 1, transcript variant X2	GO:0001939,GO:0001940,GO:0005634,GO:0005721,GO:0005819,GO:0010369,GO:0019899,GO:0042802,GO:0042803,GO:0045892,GO:1990226,GO:0000775,GO:0000784,GO:0000785	female pronucleus|male pronucleus|nucleus|pericentric heterochromatin|spindle|chromocenter|enzyme binding|identical protein binding|protein homodimerization activity|negative regulation of transcription, DNA-templated|histone methyltransferase binding|chromosome, centromeric region|nuclear chromosome, telomeric region|chromatin
TCONS_00007918	3.221468571	0	6.442937143	Inf	Inf	0.016208478	1	Up	0.000263949	1.58E-06	1.20E-21	0.4307933	1.57E-21	0.3904312	Chr10	109416673	109446758	-	XLOC_003415	XM_008768494.2	0	antisense	genic	intronic	overlapping	Bahcc1	GeneID:360674,Genbank:XM_008768494.2,RGD:1306500	BAH domain and coiled-coil containing 1, transcript variant X1	GO:0005654,GO:0005677,GO:0006342,GO:0031507,GO:0000785,GO:0000976,GO:0003682	nucleoplasm|chromatin silencing complex|chromatin silencing|heterochromatin assembly|chromatin|transcription regulatory region sequence-specific DNA binding|chromatin binding
TCONS_00008895	16.26458422	5.052463679	27.47670475	5.43827853	2.443150043	0.007581989	1	Up	1.616908	0.6110691	0	4.655629	2.348498	6.351367	Chr11	70179265	70217670	-	XLOC_003847	XM_008768788.1	0	sense	genic	intronic	overlapping	Muc13	GeneID:207126,Genbank:XM_008768788.1,RGD:708547	mucin 13, cell surface associated	GO:0008150,GO:0016021,GO:0016324,GO:0030277,GO:0042803,GO:0003674,GO:0005615,GO:0005829	biological_process|integral component of membrane|apical plasma membrane|maintenance of gastrointestinal epithelium|protein homodimerization activity|molecular_function|extracellular space|cytosol
TCONS_00010992	15.86514629	0	31.73029258	Inf	Inf	0.013114332	1	Up	0.002368394	0.000261623	3.89E-08	3.483062	9.21E-08	11.03239	Chr13	91333997	91334306	+	XLOC_004673	XM_017599048.1	0	sense	genic	exonic	overlapping	LOC108352650	GeneID:108352650,Genbank:XM_017599048.1	40S ribosomal protein S29	GO:0008270,GO:0042788,GO:0002181,GO:0003735,GO:0005791	zinc ion binding|polysomal ribosome|cytoplasmic translation|structural constituent of ribosome|rough endoplasmic reticulum
TCONS_00010993	14.47194699	1.312803379	27.6310906	21.04739448	4.395569744	0.011115543	1	Up	0.2459515	0.2320508	0.003116262	0.07630643	4.26857	4.854619	Chr13	91333997	91372971	+	XLOC_004673	XM_017599048.1	0	sense	genic	exonic	containing	LOC108352650	GeneID:108352650,Genbank:XM_017599048.1	40S ribosomal protein S29	GO:0008270,GO:0042788,GO:0002181,GO:0003735,GO:0005791	zinc ion binding|polysomal ribosome|cytoplasmic translation|structural constituent of ribosome|rough endoplasmic reticulum
TCONS_00012307	120.835435	197.752365	43.91850502	0.222088393	-2.170794097	0.000658631	0.965882453	Down	11.56196	13.79947	12.67941	0.0742152	0.000844505	8.642007	Chr14	84213389	84292381	+	XLOC_005239	XM_008770339.2	0	sense	genic	intronic	containing	Sec14l4	GeneID:498399,Genbank:XM_008770339.2,RGD:1565810	SEC14-like lipid binding 4, transcript variant X1
TCONS_00014328	424.6168234	253.7938453	595.4398015	2.346155403	1.230298577	0.035028332	1	Up	2.109745	1.02409	1.084833	3.210004	3.752305	3.338999	Chr15	48194174	48200770	-	XLOC_006076	XM_017599957.1	0	sense	genic	exonic	overlapping	Hmbox1	GeneID:305968,Genbank:XM_017599957.1,RGD:1306787	homeobox containing 1, transcript variant X8	GO:0042802,GO:0003720,GO:0043565,GO:0005634,GO:0044877,GO:0005654,GO:0005697,GO:0005737,GO:0005829,GO:0006278,GO:0045892,GO:0016604,GO:0045893,GO:0051973,GO:0032212,GO:0000122,GO:0035563,GO:0000784,GO:0042162,GO:0003691	identical protein binding|telomerase activity|sequence-specific DNA binding|nucleus|protein-containing complex binding|nucleoplasm|telomerase holoenzyme complex|cytoplasm|cytosol|RNA-dependent DNA biosynthetic process|negative regulation of transcription, DNA-templated|nuclear body|positive regulation of transcription, DNA-templated|positive regulation of telomerase activity|positive regulation o…
TCONS_00016745	12.68991125	0.309707844	25.07011466	80.94762583	6.338916862	0.004023662	1	Up	0.002457799	0.1384465	1.84E-10	4.439597	3.813458	0.01803681	Chr17	34150714	34204851	-	XLOC_007091	XM_008771604.1	0	sense	genic	exonic	overlapping	Foxf2	GeneID:364707,Genbank:XM_008771604.1,RGD:1589717	forkhead box F2, transcript variant X1	GO:0048566,GO:0003677,GO:0048596,GO:0003700,GO:0048806,GO:0005575,GO:0005634,GO:0005667,GO:0008134,GO:0008150,GO:0060021,GO:0030198,GO:0042249,GO:0043565,GO:0045892,GO:0000977,GO:0045893,GO:0001228,GO:0045944,GO:0003674	embryonic digestive tract development|DNA binding|embryonic camera-type eye morphogenesis|DNA binding transcription factor activity|genitalia development|cellular_component|nucleus|transcription factor complex|transcription factor binding|biological_process|roof of mouth development|extracellular matrix organization|establishment of planar polarity of embryonic epithelium|sequence-specific DNA bi…
TCONS_00016893	31.33197818	0	62.66395636	Inf	Inf	0.005186762	1	Up	0.001157981	2.45E-08	0.000228842	0.000104661	3.414056	1.275501	Chr17	57976317	58055615	-	XLOC_007153	NM_053539.2	0	sense	genic	exonic	overlapping	Idi1	GeneID:89784,Genbank:NM_053539.2,RGD:621835	isopentenyl-diphosphate delta isomerase 1	GO:0050992,GO:0004452,GO:0005737,GO:0005777,GO:0006695,GO:0008299,GO:0009240,GO:0016787,GO:0000287,GO:0030145,GO:0035634	dimethylallyl diphosphate biosynthetic process|isopentenyl-diphosphate delta-isomerase activity|cytoplasm|peroxisome|cholesterol biosynthetic process|isoprenoid biosynthetic process|isopentenyl diphosphate biosynthetic process|hydrolase activity|magnesium ion binding|manganese ion binding|response to stilbenoid	rno00900	Terpenoid backbone biosynthesis
TCONS_00017308	31.90841511	63.81683023	0	0	#NAME?	0.008814685	1	Down	14.6943	1.20E-06	4.906857	4.37E-05	0.001003282	0	Chr18	29104318	29164112	+	XLOC_007315	XM_008772062.2	0	sense	genic	exonic	overlapping	LOC102557111	GeneID:102557111,Genbank:XM_008772062.2,RGD:7498283	WAS/WASL-interacting protein family member 3-like, transcript variant X1
TCONS_00020266	15.50138239	29.45711815	1.545646618	0.052471074	-4.252333878	0.001393417	1	Down	1.024499	0.2308989	0.809818	0.1095106	0.006448707	0.001290278	Chr2	198707013	198751924	+	XLOC_008618	XM_006232978.3	0	sense	genic	exonic	overlapping	Lix1l	GeneID:499677,Genbank:XM_006232978.3,RGD:1593161	Lix1-like, transcript variant X1	GO:0006914,GO:0008150,GO:0097352,GO:0003674,GO:0005575,GO:0005737	autophagy|biological_process|autophagosome maturation|molecular_function|cellular_component|cytoplasm
TCONS_00021317	6.455373106	11.98335824	0.927387971	0.077389656	-3.691715445	0.0357467	1	Down	2.819256	1.517211	0.3728339	0.370835	6.73E-23	3.52E-27	Chr2	166319227	166319834	-	XLOC_009112	XM_227252.9	28539	antisense	intergenic	upstream	divergent	RGD1563620	GeneID:310511,Genbank:XM_227252.9,RGD:1563620	similar to retinoblastoma binding protein 4, transcript variant X1			rno04218	Cellular senescence
TCONS_00028273	2.652700493	5.305400986	0	0	#NAME?	0.03291885	1	Down	0.001537877	1.378846	0.6891713	0	0.008145812	0	Chr4	88603837	88604170	-	XLOC_011889	XM_008762963.2	2681	sense	intergenic	downstream	same_strand	Herc6	GeneID:362376,Genbank:XM_008762963.2,RGD:1561739	HECT and RLD domain containing E3 ubiquitin protein ligase family member 6, transcript variant X2	GO:0005634,GO:0005737,GO:0005829,GO:0016567,GO:0061630,GO:0002244,GO:0004842	nucleus|cytoplasm|cytosol|protein ubiquitination|ubiquitin protein ligase activity|hematopoietic progenitor cell differentiation|ubiquitin-protein transferase activity
TCONS_00030253	82.697794	160.343398	5.052189955	0.031508562	-4.98811226	2.38E-10	2.09E-06	Down	4.046847	4.234236	4.999113	0.000347631	0.3195056	0.0822885	Chr5	845564	847036	-	XLOC_012776	XM_006237717.3	0	sense	genic	exonic	nested	LOC679565	GeneID:679565,Genbank:XM_006237717.3,RGD:1587118	similar to acyl-Coenzyme A binding domain containing 5
TCONS_00030516	10.46086491	2.208322547	18.71340727	8.474037136	3.083049451	0.039052307	1	Up	0.01775017	0.07955851	0.7167687	2.196381	0.4473902	4.218598	Chr5	58994688	59064783	-	XLOC_012879	NM_001107956.1	0	antisense	genic	intronic	containing	Car9	GeneID:313495,Genbank:NM_001107956.1,RGD:1306426	carbonic anhydrase 9	GO:0004089,GO:0005886,GO:0006730,GO:0008270,GO:0016021,GO:0016323,GO:0033574,GO:0042493,GO:0046903,GO:0001666,GO:0002009,GO:0003674	carbonate dehydratase activity|plasma membrane|one-carbon metabolic process|zinc ion binding|integral component of membrane|basolateral plasma membrane|response to testosterone|response to drug|secretion|response to hypoxia|morphogenesis of an epithelium|molecular_function	rno00910	Nitrogen metabolism
TCONS_00032521	2.66764755	5.3352951	0	0	#NAME?	0.036157025	1	Down	0.2271913	1.61E-10	0.182795	0.000411829	0.002358247	3.26E-06	Chr6	10768320	10843901	-	XLOC_013740	NM_139253.1	43402	sense	intergenic	downstream	same_strand	Mcfd2	GeneID:246117,Genbank:NM_139253.1,RGD:628690	multiple coagulation factor deficiency 2	GO:0005783,GO:0005793,GO:0005794,GO:0007420,GO:0015031,GO:0016192,GO:0019752,GO:0060548,GO:0003674,GO:0005509,GO:0005576	endoplasmic reticulum|endoplasmic reticulum-Golgi intermediate compartment|Golgi apparatus|brain development|protein transport|vesicle-mediated transport|carboxylic acid metabolic process|negative regulation of cell death|molecular_function|calcium ion binding|extracellular region
TCONS_00033624	31.83495855	50.25656512	13.41335199	0.266897508	-1.905642259	0.042059896	1	Down	12.32307	3.561679	9.457563	2.302957	4.72743	0	Chr7	26882394	26903534	+	XLOC_014234	XM_017594825.1	0	antisense	genic	intronic	overlapping	Chst11	GeneID:314694,Genbank:XM_017594825.1,RGD:1308400	carbohydrate (chondroitin 4) sulfotransferase 11, transcript variant X1	GO:0042733,GO:0007585,GO:0043066,GO:0008146,GO:0047756,GO:0009791,GO:0016021,GO:0016051,GO:0030204,GO:0048589,GO:0030206,GO:0048703,GO:0030326,GO:0048704,GO:0030512,GO:0050659,GO:0033037,GO:0000139,GO:0051216,GO:0036342,GO:0001537,GO:0042127,GO:0002063	embryonic digit morphogenesis|respiratory gaseous exchange|negative regulation of apoptotic process|sulfotransferase activity|chondroitin 4-sulfotransferase activity|post-embryonic development|integral component of membrane|carbohydrate biosynthetic process|chondroitin sulfate metabolic process|developmental growth|chondroitin sulfate biosynthetic process|embryonic viscerocranium morphogenesis|em…	rno00532	Glycosaminoglycan biosynthesis - chondroitin sulfate / dermatan sulfate
TCONS_00034937	27.24378691	4.100209311	50.3873645	12.28897373	3.619292534	0.019601911	1	Up	0.000680791	0.05175079	0.2311529	0.8630123	2.078207	0.3732196	Chr7	63925597	63971772	-	XLOC_014804	XM_008765403.2	0	sense	genic	exonic	overlapping	Srgap1	GeneID:314903,Genbank:XM_008765403.2,RGD:1566260	SLIT-ROBO Rho GTPase activating protein 1, transcript variant X1	GO:0007266,GO:0016477,GO:0017048,GO:0030336,GO:0043547,GO:0048365,GO:0005096,GO:0005737	Rho protein signal transduction|cell migration|Rho GTPase binding|negative regulation of cell migration|positive regulation of GTPase activity|Rac GTPase binding|GTPase activator activity|cytoplasm	rno04360	Axon guidance
TCONS_00035038	26.90437418	42.63301076	11.17573761	0.262138127	-1.931600889	0.01547512	1	Down	2.531892	2.020382	2.729053	0.5881123	0.001082978	1.388888	Chr7	76058617	76059510	-	XLOC_014850	XM_006241552.2	0	antisense	genic	exonic	overlapping	Grhl2	GeneID:299979,Genbank:XM_006241552.2,RGD:1561191	grainyhead-like transcription factor 2, transcript variant X1	GO:0003700,GO:0005575,GO:0005634,GO:0005654,GO:0005911,GO:0034329,GO:0006357,GO:0035264,GO:0006366,GO:0042733,GO:0007155,GO:0043010,GO:0043565,GO:0044030,GO:0045617,GO:0045893,GO:0045944,GO:0001161,GO:0001228,GO:0001701,GO:0001843,GO:0003208,GO:0003382,GO:0003674,GO:0003682,GO:0007420,GO:0008150,GO:0008283,GO:0008544,GO:0010468,GO:0021915,GO:0048568,GO:0048701,GO:0030323,GO:0051973,GO:0031490,GO:…	DNA binding transcription factor activity|cellular_component|nucleus|nucleoplasm|cell-cell junction|cell junction assembly|regulation of transcription by RNA polymerase II|multicellular organism growth|transcription by RNA polymerase II|embryonic digit morphogenesis|cell adhesion|camera-type eye development|sequence-specific DNA binding|regulation of DNA methylation|negative regulation of keratin…
TCONS_00035040	10.1276336	1.952402887	18.30286432	9.374532499	3.228746746	0.021031545	1	Up	0.1115694	0.05754559	0.2170107	1.300064	2.150449	0.2822557	Chr7	76058623	76059511	-	XLOC_014850	XM_006241552.2	0	antisense	genic	exonic	nested	Grhl2	GeneID:299979,Genbank:XM_006241552.2,RGD:1561191	grainyhead-like transcription factor 2, transcript variant X1	GO:0003700,GO:0005575,GO:0005634,GO:0005654,GO:0005911,GO:0034329,GO:0006357,GO:0035264,GO:0006366,GO:0042733,GO:0007155,GO:0043010,GO:0043565,GO:0044030,GO:0045617,GO:0045893,GO:0045944,GO:0001161,GO:0001228,GO:0001701,GO:0001843,GO:0003208,GO:0003382,GO:0003674,GO:0003682,GO:0007420,GO:0008150,GO:0008283,GO:0008544,GO:0010468,GO:0021915,GO:0048568,GO:0048701,GO:0030323,GO:0051973,GO:0031490,GO:…	DNA binding transcription factor activity|cellular_component|nucleus|nucleoplasm|cell-cell junction|cell junction assembly|regulation of transcription by RNA polymerase II|multicellular organism growth|transcription by RNA polymerase II|embryonic digit morphogenesis|cell adhesion|camera-type eye development|sequence-specific DNA binding|regulation of DNA methylation|negative regulation of keratin…
TCONS_00037056	18.50637016	8.199620052	28.81312026	3.513957974	1.813096937	0.03232717	1	Up	1.056502	0.00052948	0.1941604	1.020861	1.692901	2.157471	Chr8	36111624	36298719	-	XLOC_015704	XM_006242789.3	0	sense	genic	intronic	overlapping	St3gal4	GeneID:363040,Genbank:XM_006242789.3,RGD:1303068	ST3 beta-galactoside alpha-2,3-sialyltransferase 4, transcript variant X3	GO:0047288,GO:0005515,GO:0050890,GO:0006486,GO:0097503,GO:0008373,GO:0009101,GO:0009247,GO:0009311,GO:0009312,GO:0016021,GO:1990743,GO:0018279,GO:0030259,GO:0032580,GO:0000139,GO:0003836	monosialoganglioside sialyltransferase activity|protein binding|cognition|protein glycosylation|sialylation|sialyltransferase activity|glycoprotein biosynthetic process|glycolipid biosynthetic process|oligosaccharide metabolic process|oligosaccharide biosynthetic process|integral component of membrane|protein sialylation|protein N-linked glycosylation via asparagine|lipid glycosylation|Golgi cist…	rno00601	Glycosphingolipid biosynthesis - lacto and neolacto series
TCONS_00038021	24.24668849	48.15687545	0.336501536	0.006987611	-7.16098489	1.04E-08	4.59E-05	Down	2.204193	2.60474	1.051666	9.57E-12	0.0461618	5.52E-08	Chr9	19370594	19377057	+	XLOC_016161	NM_053603.2	0	antisense	genic	exonic	overlapping	Clic5	GeneID:94272,Genbank:NM_053603.2,RGD:620659	chloride intracellular channel 5	GO:0060088,GO:0008104,GO:0005244,GO:1902476,GO:0015629,GO:0005254,GO:0005634,GO:0005737,GO:0005794,GO:0032420,GO:0005815,GO:0032421,GO:0006749,GO:0034707,GO:0006821,GO:0034765,GO:0007605,GO:0002021,GO:0050885,GO:0002024,GO:0004364	auditory receptor cell stereocilium organization|protein localization|voltage-gated ion channel activity|chloride transmembrane transport|actin cytoskeleton|chloride channel activity|nucleus|cytoplasm|Golgi apparatus|stereocilium|microtubule organizing center|stereocilium bundle|glutathione metabolic process|chloride channel complex|chloride transport|regulation of ion transmembrane transport|sen…
XR_001835535.1	3.455038589	0	6.910077178	Inf	Inf	0.012686109	1	Up	1.36E-21	1.03E-13	5.55E-12	0.1364263	0.2555695	0.1286841	Chr1	13395718	13408538	+	LOC102549233	NM_001170534.2	0	sense	genic	intronic	nested	Mcc	GeneID:307449,Genbank:NM_001170534.2,RGD:1561988	mutated in colorectal cancers	GO:0005737,GO:0005829,GO:0005886,GO:0010633,GO:0045184,GO:0050680,GO:0090090,GO:0005509,GO:0005634,GO:0005654	cytoplasm|cytosol|plasma membrane|negative regulation of epithelial cell migration|establishment of protein localization|negative regulation of epithelial cell proliferation|negative regulation of canonical Wnt signaling pathway|calcium ion binding|nucleus|nucleoplasm
XR_001836830.1	2.406872743	4.813745486	0	0	#NAME?	0.047489627	1	Down	0.05757366	0.1082328	0.04170087	0.000231243	0.000448344	1.11E-24	Chr2	202785298	202794148	-	LOC108350073	XM_006233038.3	3618	sense	intergenic	downstream	same_strand	Fam46c	GeneID:310721,Genbank:XM_006233038.3,RGD:1359446	family with sequence similarity 46, member C, transcript variant X2	GO:0016779	nucleotidyltransferase activity
XR_001836837.1	2.999212365	5.998424729	0	0	#NAME?	0.023833691	1	Down	0.08945744	0.000102306	0.07937211	4.04E-06	5.56E-05	0	Chr2	204032153	204048727	+	LOC103691652	NM_012504.1	130	antisense	intergenic	upstream	divergent	Atp1a1	GeneID:24211,Genbank:NM_012504.1,RGD:2167	ATPase Na+/K+ transporting subunit alpha 1	GO:0005783,GO:0005794,GO:0005886,GO:0005890,GO:0005901,GO:0016020,GO:0006813,GO:0006814,GO:0016021,GO:0006883,GO:0016311,GO:0016323,GO:0016324,GO:0016791,GO:0036376,GO:0019901,GO:0042383,GO:0019904,GO:0030007,GO:0042493,GO:0043209,GO:0043531,GO:0043548,GO:0002026,GO:0090662,GO:0045121,GO:0002028,GO:1903416,GO:0045822,GO:0005391,GO:0045823,GO:1990239,GO:1990573,GO:0005515,GO:0005524,GO:0005768,GO:…	endoplasmic reticulum|Golgi apparatus|plasma membrane|sodium:potassium-exchanging ATPase complex|caveola|membrane|potassium ion transport|sodium ion transport|integral component of membrane|cellular sodium ion homeostasis|dephosphorylation|basolateral plasma membrane|apical plasma membrane|phosphatase activity|sodium ion export across plasma membrane|protein kinase binding|sarcolemma|protein doma…	rno04024,rno04022,rno04911,rno04918,rno04919,rno04925,rno04260,rno04261,rno04970,rno04971,rno04972,rno04976,rno04973,rno04974,rno04978,rno04960,rno04961,rno04964	cAMP signaling pathway|cGMP - PKG signaling pathway|Insulin secretion|Thyroid hormone synthesis|Thyroid hormone signaling pathway|Aldosterone synthesis and secretion|Cardiac muscle contraction|Adrenergic signaling in cardiomyocytes|Salivary secretion|Gastric acid secretion|Pancreatic secretion|Bile secretion|Carbohydrate digestion and absorption|Protein digestion and absorption|Mineral absorption…
XR_001837220.1	3.21446819	0	6.42893638	Inf	Inf	0.016278895	1	Up	2.07E-05	2.38E-26	8.36E-07	0.1457307	0.1164747	0.000147124	Chr3	114310470	114351861	+	LOC102557338	XM_008762216.2	3136	antisense	intergenic	upstream	divergent	Shf	GeneID:362205,Genbank:XM_008762216.2,RGD:1562705	Src homology 2 domain containing F
XR_001838081.1	8.694838259	0.632871568	16.75680495	26.47741786	4.726690529	0.049936581	1	Up	8.60E-21	0.000624256	0.01066458	0.1804816	0.008189175	0.05250963	Chr5	148966201	148978039	+	LOC108351040	NM_053893.3	9797	sense	intergenic	downstream	same_strand	Sdc3	GeneID:116673,Genbank:NM_053893.3,RGD:621486	syndecan 3	GO:0016020,GO:0016021,GO:0016477,GO:0030334,GO:0030424,GO:0031012,GO:0032991,GO:0042802,GO:0005515,GO:0043005,GO:0007155,GO:0009986	membrane|integral component of membrane|cell migration|regulation of cell migration|axon|extracellular matrix|protein-containing complex|identical protein binding|protein binding|neuron projection|cell adhesion|cell surface	rno04514	Cell adhesion molecules (CAMs)
XR_001838375.1	21.46712633	9.532971199	33.40128146	3.503764017	1.808905611	0.030230387	1	Up	0.1277843	0.09794098	0.05194615	0.2278056	0.3045855	0.4777549	Chr6	52446852	52459881	-	LOC102547703	XM_006240009.3	49	antisense	intergenic	upstream	divergent	Atxn7l1	GeneID:362726,Genbank:XM_006240009.3,RGD:1305730	ataxin 7-like 1, transcript variant X1	GO:0003674,GO:0005575,GO:0008150	molecular_function|cellular_component|biological_process
XR_001838805.1	2.388456097	0	4.776912195	Inf	Inf	0.046457616	1	Up	7.63E-08	3.31E-28	4.77E-11	0.1170908	0.03193199	0.02627034	Chr7	35389275	35402950	-	LOC102554269	XM_017594837.1	0	antisense	genic	intronic	nested	Tmcc3	GeneID:314751,Genbank:XM_017594837.1,RGD:1307241	transmembrane and coiled-coil domain family 3, transcript variant X2	GO:0012505,GO:0016021	endomembrane system|integral component of membrane
XR_001839513.1	3.407836496	0.316435784	6.499237207	20.53888194	4.360285744	0.042864712	1	Up	0.000669497	3.47E-05	0.0144587	0.09284754	0.01098121	0.1164631	Chr8	109498073	109565270	+	LOC102548692	NM_001012202.2	0	antisense	genic	intronic	nested	Ppp2r3a	GeneID:363122,Genbank:NM_001012202.2,RGD:1306958	protein phosphatase 2, regulatory subunit B'', alpha	GO:0005509,GO:0007525,GO:0030674,GO:0045732,GO:0090090,GO:0090249,GO:0090263,GO:0000159,GO:0001754	calcium ion binding|somatic muscle development|protein binding, bridging|positive regulation of protein catabolic process|negative regulation of canonical Wnt signaling pathway|regulation of cell motility involved in somitogenic axis elongation|positive regulation of canonical Wnt signaling pathway|protein phosphatase type 2A complex|eye photoreceptor cell differentiation	rno03015,rno04071,rno04151,rno04152,rno04261,rno04728,rno05165	mRNA surveillance pathway|Sphingolipid signaling pathway|PI3K-Akt signaling pathway|AMPK signaling pathway|Adrenergic signaling in cardiomyocytes|Dopaminergic synapse|Human papillomavirus infection
XR_001839559.1	15.68139499	25.87616866	5.48662132	0.212033759	-2.23763411	0.0174746	1	Down	0.1309225	0.1972598	0.07647642	0.04368267	0.001855445	0.04584791	Chr8	124574759	124584735	+	LOC102549917
XR_001839610.1	45.16426603	22.29449128	68.03404078	3.051607679	1.609569498	0.024343439	1	Up	0.2394172	0.4569815	1.02E-09	0.6222255	0.8058691	0.7222005	Chr8	125545408	125568140	+	LOC102550774	XM_017596200.1	0	antisense	genic	intronic	nested	Rbms3	GeneID:680726,Genbank:XM_017596200.1,RGD:1588240	RNA binding motif, single stranded interacting protein 3, transcript variant X2	GO:0008143,GO:0008266,GO:0010628,GO:0010629,GO:0035925,GO:0045727,GO:0090090,GO:0002357,GO:0003730,GO:0005737	poly(A) binding|poly(U) RNA binding|positive regulation of gene expression|negative regulation of gene expression|mRNA 3'-UTR AU-rich region binding|positive regulation of translation|negative regulation of canonical Wnt signaling pathway|defense response to tumor cell|mRNA 3'-UTR binding|cytoplasm
XR_001840384.1	4.029706158	0.619415688	7.439996627	12.01131449	3.58632214	0.049449769	1	Up	0.003761846	0.02339807	0.004179586	0.1400264	0.1452009	0.007477687	Chr10	82734389	82743280	-	LOC102556395	NM_053304.1	2521	antisense	intergenic	upstream	divergent	Col1a1	GeneID:29393,Genbank:NM_053304.1,RGD:61817	collagen, type I, alpha 1	GO:0005576,GO:0005578,GO:0005581,GO:0005584,GO:0005615,GO:0031012,GO:0005737,GO:0005783,GO:0031667,GO:0005794,GO:0031960,GO:0032355,GO:0032964,GO:0034504,GO:0048407,GO:0034505,GO:0048545,GO:0038063,GO:0048705,GO:0042060,GO:0048706,GO:0051591,GO:0055093,GO:0060325,GO:0001501,GO:1902618,GO:0060346,GO:0001503,GO:0060351,GO:0001568,GO:0070208,GO:0001649,GO:0001957,GO:0001958,GO:0002020,GO:0005201,GO:…	extracellular region|proteinaceous extracellular matrix|collagen trimer|collagen type I trimer|extracellular space|extracellular matrix|cytoplasm|endoplasmic reticulum|response to nutrient levels|Golgi apparatus|response to corticosteroid|response to estradiol|collagen biosynthetic process|protein localization to nucleus|platelet-derived growth factor binding|tooth mineralization|response to ster…	rno04151,rno04512,rno04510,rno04611,rno04926,rno04974,rno04933,rno05165,rno05146	PI3K-Akt signaling pathway|ECM-receptor interaction|Focal adhesion|Platelet activation|Relaxin signaling pathway|Protein digestion and absorption|AGE-RAGE signaling pathway in diabetic complications|Human papillomavirus infection|Amoebiasis
XR_001840710.1	5.352496566	10.70499313	0	0	#NAME?	0.042588622	1	Down	1.40E-05	0.04751713	0.1573756	9.83E-08	0.000109432	1.34E-19	Chr12	47533276	47543405	-	LOC102546787	XM_579793.6	8344	antisense	intergenic	upstream	divergent	RGD1560398	GeneID:498192,Genbank:XM_579793.6,RGD:1560398	RGD1560398
XR_001840752.1	10.74783755	1.326259259	20.16941584	15.20774743	3.926734572	0.028604255	1	Up	0.02932127	3.65E-05	0.03897447	0.764995	5.54E-09	0.5149667	Chr12	20539525	20543635	-	LOC102554946	XM_017598625.1	26007	sense	intergenic	downstream	same_strand	RGD1562525	GeneID:363899,Genbank:XM_017598625.1,RGD:1562525	similar to cell surface receptor FDFACT
XR_001840908.1	58.61151633	18.28257909	98.94045356	5.411733928	2.43609091	0.004688651	1	Up	0.02502207	0.2339208	0.2998648	1.53689	0.4311815	0.997812	Chr13	90900495	90905465	+	LOC102555374	NM_001024882.2	4086	sense	intergenic	upstream	same_strand	Cfap45	GeneID:304984,Genbank:NM_001024882.2,RGD:1561559	cilia and flagella associated protein 45	GO:0005654	nucleoplasm
XR_001841655.1	5.975079752	1.245559315	10.70460019	8.594211496	3.103365281	0.034441473	1	Up	5.65E-15	0.02286834	0.006759984	0.02037844	0.1187792	0.08892254	Chr16	69364259	69385373	+	LOC108348412
XR_001841743.1	8.235106567	13.82516707	2.645046062	0.191321092	-2.385932163	0.047466337	1	Down	0.1219728	0.2687913	0.0385946	0.01810076	0.009366184	0.05794087	Chr17	963489	1019637	-	LOC103694035	XM_008771423.2	7786	sense	intergenic	upstream	same_strand	Fancc	GeneID:24361,Genbank:XM_008771423.2,RGD:2593	Fanconi anemia, complementation group C, transcript variant X6	GO:0034599,GO:0003674,GO:0043240,GO:0005829,GO:0006289,GO:0007276,GO:0007281,GO:0048854,GO:0008150,GO:0019430,GO:0000785,GO:0097150,GO:0002262	cellular response to oxidative stress|molecular_function|Fanconi anaemia nuclear complex|cytosol|nucleotide-excision repair|gamete generation|germ cell development|brain morphogenesis|biological_process|removal of superoxide radicals|chromatin|neuronal stem cell population maintenance|myeloid cell homeostasis	rno03460	Fanconi anemia pathway
XR_001841893.1	2.81407465	0	5.628149301	Inf	Inf	0.028579966	1	Up	5.13E-06	0.007153173	0.00097588	0.06500211	0.02709091	0.2024077	Chr17	32173844	32190777	-	LOC102554685	XM_006253869.2	0	antisense	genic	exonic	overlapping	Serpinb6	GeneID:291085,Genbank:XM_006253869.2,RGD:735108	serpin family B member 6, transcript variant X1	GO:0005576,GO:0005615,GO:0005622,GO:0005634,GO:0005737,GO:0007605,GO:0010951,GO:0071470,GO:0097180,GO:0002020,GO:0004867	extracellular region|extracellular space|intracellular|nucleus|cytoplasm|sensory perception of sound|negative regulation of endopeptidase activity|cellular response to osmotic stress|serine protease inhibitor complex|protease binding|serine-type endopeptidase inhibitor activity	rno05146	Amoebiasis
XR_001842779.1	3.20220933	0	6.404418659	Inf	Inf	0.025658445	1	Up	5.18E-06	1.82E-10	7.54E-09	0.000515725	0.07346237	0.04473592	ChrX	137700764	137749030	-	LOC103690083	XM_008773581.2	89911	antisense	intergenic	upstream	divergent	LOC103690902	GeneID:103690902,Genbank:XM_008773581.2,RGD:9324676	high mobility group protein B4-like
XR_001842782.1	7.537131929	1.703211167	13.37105269	7.850496138	2.972783833	0.017712854	1	Up	0.02759779	0.000996203	0.005247471	0.1094362	0.124101	0.06435535	ChrX	137705981	137749030	-	LOC103690083	XM_008773581.2	89911	antisense	intergenic	upstream	divergent	LOC103690902	GeneID:103690902,Genbank:XM_008773581.2,RGD:9324676	high mobility group protein B4-like
XR_001842788.1	4.955737788	0	9.911475576	Inf	Inf	0.009643387	1	Up	1.78E-08	1.47E-10	8.79E-07	0.1311002	0.08413379	9.58E-08	ChrX	137705981	137749030	-	LOC103690083	XM_008773581.2	89911	antisense	intergenic	upstream	divergent	LOC103690902	GeneID:103690902,Genbank:XM_008773581.2,RGD:9324676	high mobility group protein B4-like
XR_351227.1	8.239007691	14.11472643	2.363288951	0.167434272	-2.578333229	0.028726122	1	Down	0.9033138	1.918468	1.035566	0.002456055	0.2125396	0.4335474	Chr1	282723111	282724211	+	LOC102551636	XM_017590407.1	0	sense	genic	intronic	nested	LOC688542	GeneID:688542,Genbank:XM_017590407.1	pyrethroid hydrolase Ces2e-like
XR_352598.3	10.1858767	3.134064441	17.23768896	5.500106742	2.459459618	0.026508789	1	Up	0.06662182	0.4812444	0.000694428	1.130205	0.4919275	1.172207	Chr3	122063901	122069835	-	LOC102546597	NM_001134515.1	6269	sense	intergenic	upstream	same_strand	RGD1566226	GeneID:296149,Genbank:NM_001134515.1,RGD:1566226	similar to hypothetical protein F830045P16	GO:0005886,GO:0016021	plasma membrane|integral component of membrane
XR_355004.2	9.232423167	0.619415688	17.84543065	28.81010443	4.848502985	0.031288304	1	Up	2.29E-05	0.02943992	0.005046974	0.2196859	0.05749194	0.659189	Chr6	110909755	110921840	+	LOC102555554	NM_001012470.1	5467	antisense	intergenic	upstream	divergent	Irf2bpl	GeneID:314329,Genbank:NM_001012470.1,RGD:1310994	interferon regulatory factor 2 binding protein-like	GO:0005634,GO:0005654,GO:0045944,GO:0046543,GO:0046872,GO:0000122	nucleus|nucleoplasm|positive regulation of transcription by RNA polymerase II|development of secondary female sexual characteristics|metal ion binding|negative regulation of transcription by RNA polymerase II
XR_357874.3	81.21364742	118.9587523	43.46854257	0.365408528	-1.45241779	0.027322022	1	Down	12.68759	16.82136	8.12973	4.99077	3.097762	5.857725	Chr10	85864574	85865284	+	LOC100910455	NM_001107046.1	5838	antisense	intergenic	downstream	convergent	Plxdc1	GeneID:303505,Genbank:NM_001107046.1,RGD:1307496	plexin domain containing 1	GO:0005886,GO:0016021,GO:0021510,GO:0030425,GO:0043025,GO:0043235,GO:0001525,GO:0003674,GO:0005737	plasma membrane|integral component of membrane|spinal cord development|dendrite|neuronal cell body|receptor complex|angiogenesis|molecular_function|cytoplasm
XR_362560.3	60.42086555	23.57518152	97.26654958	4.125802786	2.044674862	0.002027183	1	Up	0.9426173	5.14E-05	2.61E-11	1.639223	1.393335	1.375581	ChrX	124326752	124338947	-	LOC102546820	XM_006257481.2	246	antisense	intergenic	downstream	convergent	Zbtb33	GeneID:501506,Genbank:XM_006257481.2,RGD:1566309	zinc finger and BTB domain containing 33, transcript variant X1	GO:0005654,GO:0005730,GO:0005829,GO:0005886,GO:0008150,GO:0008327,GO:0043565,GO:0045892,GO:0003674,GO:0005575,GO:0005634	nucleoplasm|nucleolus|cytosol|plasma membrane|biological_process|methyl-CpG binding|sequence-specific DNA binding|negative regulation of transcription, DNA-templated|molecular_function|cellular_component|nucleus
XR_590319.2	19.27760641	7.725565303	30.82964751	3.990600856	1.996605986	0.045642483	1	Up	0.02509822	0.01331609	0.08050913	0.09749162	0.09756355	0.2825613	Chr1	126701729	126710127	+	LOC102549305	NM_012999.1	39381	sense	intergenic	upstream	same_strand	Pcsk6	GeneID:25507,Genbank:NM_012999.1,RGD:3246	proprotein convertase subtilisin/kexin type 6	GO:0048406,GO:0016486,GO:0005615,GO:0007354,GO:0007368,GO:0008201,GO:0031012,GO:0009100,GO:0032902,GO:0009986,GO:0004175,GO:0032940,GO:0004252,GO:0016485	nerve growth factor binding|peptide hormone processing|extracellular space|zygotic determination of anterior/posterior axis, embryo|determination of left/right symmetry|heparin binding|extracellular matrix|glycoprotein metabolic process|nerve growth factor production|cell surface|endopeptidase activity|secretion by cell|serine-type endopeptidase activity|protein processing
XR_590363.2	8.843192415	15.71745312	1.968931711	0.125270405	-2.99688248	0.024585648	1	Down	0.07141592	0.6715481	0.414512	0.03735582	0.03189804	0.07743147	Chr1	143349121	143361938	+	LOC102556224	XM_006229440.3	2929	antisense	intergenic	downstream	convergent	Fsd2	GeneID:308779,Genbank:XM_006229440.3,RGD:1305167	fibronectin type III and SPRY domain containing 2, transcript variant X1
XR_590452.1	2.659428433	5.318856866	0	0	#NAME?	0.032773481	1	Down	0	1.089397	1.055845	0	0	0	Chr1	191827171	191829514	-	LOC102549682	XM_008759685.2	33	antisense	intergenic	upstream	divergent	Scnn1b	GeneID:24767,Genbank:XM_008759685.2,RGD:3640	sodium channel epithelial 1 beta subunit, transcript variant X4	GO:0006814,GO:0009897,GO:0009986,GO:0015280,GO:0050699,GO:0016020,GO:0050891,GO:0050909,GO:0055078,GO:0001666,GO:0002028,GO:0005272,GO:0005515,GO:0005887,GO:0016021,GO:0016324,GO:0030659,GO:0034706,GO:0035313,GO:0070062,GO:0035725	sodium ion transport|external side of plasma membrane|cell surface|ligand-gated sodium channel activity|WW domain binding|membrane|multicellular organismal water homeostasis|sensory perception of taste|sodium ion homeostasis|response to hypoxia|regulation of sodium ion transport|sodium channel activity|protein binding|integral component of plasma membrane|integral component of membrane|apical pla…	rno04960,rno04742	Aldosterone-regulated sodium reabsorption|Taste transduction
XR_590927.2	8.277979126	15.20528519	1.350673063	0.088829183	-3.492822464	0.006016488	1	Down	0.2532866	0.1978682	0.5391746	0	0.0215863	0.0588042	Chr2	52825390	52830420	+	LOC103691468
XR_591165.2	14.32601799	27.3044742	1.347561783	0.049353149	-4.340714051	0.005833351	1	Down	0.04902492	0.8553572	0.6637032	1.49E-14	0.05285753	0.02525949	Chr2	183811542	183860497	+	LOC102551266	XM_006232553.3	164	antisense	intergenic	upstream	divergent	LOC102551095	GeneID:102551095,Genbank:XM_006232553.3,RGD:7611669	uncharacterized LOC102551095
XR_591499.1	3.096914133	6.193828265	0	0	#NAME?	0.033543128	1	Down	1.213917	0	2.71097	0	0	0	Chr3	35208132	35208726	-	LOC102556679	NM_001107730.1	0	antisense	genic	exonic	nested	Kif5c	GeneID:311024,Genbank:NM_001107730.1,RGD:1308539	kinesin family member 5C	GO:0098963,GO:0035253,GO:0008045,GO:0005524,GO:0098964,GO:0008104,GO:0005737,GO:0043005,GO:0008574,GO:0098971,GO:0005871,GO:0005874,GO:0007018,GO:0016887,GO:0046034,GO:0007411,GO:0048489,GO:0030425,GO:0008017,GO:0051028,GO:0030705,GO:0003777,GO:0032839,GO:0034190,GO:0005515	dendritic transport of messenger ribonucleoprotein complex|ciliary rootlet|motor neuron axon guidance|ATP binding|anterograde dendritic transport of messenger ribonucleoprotein complex|protein localization|cytoplasm|neuron projection|ATP-dependent microtubule motor activity, plus-end-directed|anterograde dendritic transport of neurotransmitter receptor complex|kinesin complex|microtubule|microtub…	rno04144,rno04728	Endocytosis|Dopaminergic synapse
XR_592751.2	7.330435415	1.275817377	13.38505345	10.49135534	3.391129161	0.011467677	1	Up	0.02186819	0.0622288	0.006144569	0.3626143	0.1825814	0.4199456	Chr5	154895300	154898934	-	LOC103692495	NM_030830.2	0	antisense	genic	exonic	nested	Luzp1	GeneID:79428,Genbank:NM_030830.2,RGD:61839	leucine zipper protein 1	GO:0005634,GO:0021503,GO:0060840,GO:0003281	nucleus|neural fold bending|artery development|ventricular septum development
XR_592789.2	4.584588934	8.523547009	0.645630859	0.075746735	-3.72267248	0.029368111	1	Down	0.01653208	0.128805	0.1403914	0.009949891	0.01204681	5.01E-09	Chr5	167070805	167086851	+	LOC103692514	NM_001012107.1	22840	sense	intergenic	upstream	same_strand	Gpr157	GeneID:313725,Genbank:NM_001012107.1,RGD:1311096	G protein-coupled receptor 157	GO:0007186,GO:0016021,GO:0048512,GO:0051482,GO:0060019,GO:0060170,GO:0004930,GO:0007166	G-protein coupled receptor signaling pathway|integral component of membrane|circadian behavior|positive regulation of cytosolic calcium ion concentration involved in phospholipase C-activating G-protein coupled signaling pathway|radial glial cell differentiation|ciliary membrane|G-protein coupled receptor activity|cell surface receptor signaling pathway
XR_593571.2	2.868041254	0	5.736082509	Inf	Inf	0.027643569	1	Up	3.17E-05	0.001021515	0.000152886	1.90E-13	0.05687114	0.08566623	Chr7	102648396	102871316	+	Pvt1	NM_012603.2	57156	sense	intergenic	downstream	same_strand	Myc	GeneID:24577,Genbank:NM_012603.2,RGD:3130	myelocytomatosis oncogene	GO:0043066,GO:0043085,GO:0043279,GO:0043280,GO:0000987,GO:0001077,GO:0043388,GO:0001541,GO:0043473,GO:0001658,GO:0045787,GO:0043565,GO:0045821,GO:0044195,GO:0001701,GO:0045893,GO:0044330,GO:0001783,GO:0005634,GO:0002053,GO:0045944,GO:0002082,GO:0050910,GO:0046325,GO:0005635,GO:0051276,GO:0046722,GO:0005654,GO:0046982,GO:0051782,GO:0006352,GO:0006355,GO:0005719,GO:0051973,GO:0005730,GO:0060070,GO:…	negative regulation of apoptotic process|positive regulation of catalytic activity|response to alkaloid|positive regulation of cysteine-type endopeptidase activity involved in apoptotic process|proximal promoter sequence-specific DNA binding|transcriptional activator activity, RNA polymerase II proximal promoter sequence-specific DNA binding|positive regulation of DNA binding|ovarian follicle dev…	rno04010,rno04012,rno04310,rno04350,rno04390,rno04630,rno04151,rno04110,rno04218,rno04550,rno04919,rno05200,rno05230,rno05202,rno05206,rno05205,rno05210,rno05225,rno05226,rno05216,rno05221,rno05220,rno05219,rno05213,rno05224,rno05222,rno05166,rno05161,rno05167,rno05169	MAPK signaling pathway|ErbB signaling pathway|Wnt signaling pathway|TGF-beta signaling pathway|Hippo signaling pathway|Jak-STAT signaling pathway|PI3K-Akt signaling pathway|Cell cycle|Cellular senescence|Signaling pathways regulating pluripotency of stem cells|Thyroid hormone signaling pathway|Pathways in cancer|Central carbon metabolism in cancer|Transcriptional misregulation in cancers|MicroRNA…
XR_593572.2	6.069125119	11.82912092	0.309129324	0.026132908	-5.25798854	0.002841092	1	Down	0.04487036	0.07693899	0.1793197	0.005204797	6.83E-07	2.26E-05	Chr7	102648442	102871316	+	Pvt1	NM_012603.2	57202	sense	intergenic	downstream	same_strand	Myc	GeneID:24577,Genbank:NM_012603.2,RGD:3130	myelocytomatosis oncogene	GO:0043066,GO:0043085,GO:0043279,GO:0043280,GO:0000987,GO:0001077,GO:0043388,GO:0001541,GO:0043473,GO:0001658,GO:0045787,GO:0043565,GO:0045821,GO:0044195,GO:0001701,GO:0045893,GO:0044330,GO:0001783,GO:0005634,GO:0002053,GO:0045944,GO:0002082,GO:0050910,GO:0046325,GO:0005635,GO:0051276,GO:0046722,GO:0005654,GO:0046982,GO:0051782,GO:0006352,GO:0006355,GO:0005719,GO:0051973,GO:0005730,GO:0060070,GO:…	negative regulation of apoptotic process|positive regulation of catalytic activity|response to alkaloid|positive regulation of cysteine-type endopeptidase activity involved in apoptotic process|proximal promoter sequence-specific DNA binding|transcriptional activator activity, RNA polymerase II proximal promoter sequence-specific DNA binding|positive regulation of DNA binding|ovarian follicle dev…	rno04010,rno04012,rno04310,rno04350,rno04390,rno04630,rno04151,rno04110,rno04218,rno04550,rno04919,rno05200,rno05230,rno05202,rno05206,rno05205,rno05210,rno05225,rno05226,rno05216,rno05221,rno05220,rno05219,rno05213,rno05224,rno05222,rno05166,rno05161,rno05167,rno05169	MAPK signaling pathway|ErbB signaling pathway|Wnt signaling pathway|TGF-beta signaling pathway|Hippo signaling pathway|Jak-STAT signaling pathway|PI3K-Akt signaling pathway|Cell cycle|Cellular senescence|Signaling pathways regulating pluripotency of stem cells|Thyroid hormone signaling pathway|Pathways in cancer|Central carbon metabolism in cancer|Transcriptional misregulation in cancers|MicroRNA…
XR_595348.1	4.519416015	0	9.038832029	Inf	Inf	0.008166307	1	Up	0.000890697	8.29E-05	1.21E-10	0.1014386	0.1078141	0.001540125	Chr12	38870220	38878652	+	LOC102556093	XM_017598598.1	1040	antisense	intergenic	upstream	divergent	LOC100359816	GeneID:100359816,Genbank:XM_017598598.1,RGD:2323325	rCG21620-like, transcript variant X1	GO:0035097,GO:0042800,GO:0048188,GO:0051568,GO:0005634,GO:0005654,GO:0005829	histone methyltransferase complex|histone methyltransferase activity (H3-K4 specific)|Set1C/COMPASS complex|histone H3-K4 methylation|nucleus|nucleoplasm|cytosol
XR_595558.2	4.06116677	0	8.122333541	Inf	Inf	0.005923385	1	Up	0	0	0	1.529764	1.027544	1.064984	Chr13	89997710	90004364	+	LOC103692282	NM_001191673.1	0	antisense	genic	intronic	overlapping	Ly9	GeneID:289227,Genbank:NM_001191673.1,RGD:1308341	lymphocyte antigen 9	GO:0032740,GO:0072540,GO:0005886,GO:0009986,GO:0016021	positive regulation of interleukin-17 production|T-helper 17 cell lineage commitment|plasma membrane|cell surface|integral component of membrane
XR_595992.2	19.55572828	30.39071517	8.720741387	0.286954135	-1.80110793	0.031296252	1	Down	0.3650929	0.812007	0.6651304	0.04293863	0.1338492	0.3605498	Chr14	113539046	113570007	-	LOC102551211	NM_001142371.1	0	antisense	genic	exonic	overlapping	Pnpt1	GeneID:360992,Genbank:NM_001142371.1,RGD:1307987	polyribonucleotide nucleotidyltransferase 1	GO:0000965,GO:0004654,GO:0005634,GO:0005737,GO:0035198,GO:0005739,GO:0035458,GO:0035927,GO:0005758,GO:0035928,GO:0042788,GO:0043457,GO:0043631,GO:0097421,GO:0045025,GO:2000627,GO:0045926,GO:2000772,GO:0051260,GO:0000175,GO:0000957,GO:0000958,GO:0000962,GO:0000963,GO:0000964,GO:0005789,GO:0005829,GO:0006401,GO:0006402,GO:0051591,GO:0008266,GO:0060416,GO:0034046,GO:0061014,GO:0034599,GO:0070207,GO:…	mitochondrial RNA 3'-end processing|polyribonucleotide nucleotidyltransferase activity|nucleus|cytoplasm|miRNA binding|mitochondrion|cellular response to interferon-beta|RNA import into mitochondrion|mitochondrial intermembrane space|rRNA import into mitochondrion|polysomal ribosome|regulation of cellular respiration|RNA polyadenylation|liver regeneration|mitochondrial degradosome|positive regula…	rno00230,rno00240,rno03018	Purine metabolism|Pyrimidine metabolism|RNA degradation
XR_596109.2	3.99429188	0	7.988583761	Inf	Inf	0.015940144	1	Up	3.99E-32	2.76E-40	4.74E-10	0.1566823	0.000153575	0.1000503	Chr15	30335457	30344366	-	LOC100360554
XR_597429.2	5.379672306	0	10.75934461	Inf	Inf	0.00602971	1	Up	0.001271933	0.000972989	5.26E-12	0.003402103	0.09040262	0.06060747	Chr20	40327611	40355111	-	LOC102553345	XM_017601625.1	0	antisense	genic	intronic	nested	Hs3st5	GeneID:294449,Genbank:XM_017601625.1,RGD:1306379	heparan sulfate-glucosamine 3-sulfotransferase 5, transcript variant X3	GO:0046596,GO:0050819,GO:0006477,GO:0008467,GO:0015015	regulation of viral entry into host cell|negative regulation of coagulation|protein sulfation|[heparan sulfate]-glucosamine 3-sulfotransferase 1 activity|heparan sulfate proteoglycan biosynthetic process, enzymatic modification	rno00534	Glycosaminoglycan biosynthesis - heparan sulfate / heparin
XR_597441.1	6.233834431	0	12.46766886	Inf	Inf	0.020601833	1	Up	3.22E-25	9.06E-11	6.48E-26	1.67E-29	4.459021	2.090391	Chr20	45301645	45316607	-	LOC103694442	NM_001106391.2	4774	sense	intergenic	downstream	same_strand	Rpf2	GeneID:294436,Genbank:NM_001106391.2,RGD:1306906	ribosome production factor 2 homolog	GO:0005730,GO:0008097,GO:0019843,GO:0042273,GO:1901796,GO:1902570,GO:0000027,GO:0000463,GO:0005634	nucleolus|5S rRNA binding|rRNA binding|ribosomal large subunit biogenesis|regulation of signal transduction by p53 class mediator|protein localization to nucleolus|ribosomal large subunit assembly|maturation of LSU-rRNA from tricistronic rRNA transcript (SSU-rRNA, 5.8S rRNA, LSU-rRNA)|nucleus
