# Supplementary material for: Comprehensive Analysis of the Profiles of Differentially Expressed mRNAs, lncRNAs, and circRNAs in Phosgene-Induced Acute Lung Injury
Source: Biomed Res Int. 2021 Jan 9;2021:6278526. doi: 10.1155/2021/6278526 (PMC7811572; doi:10.1155/2021/6278526)
Supplement: Supplementary 6 — Table S6: differentially expressed circRNAs between the B and C group. [file 6278526.f6.txt]

Table S6 Differentially expressed circRNAs between B and C group
circRNA_id	BaseMean	BaseMean_control_B	BaseMean_case_C	FoldChange	log2FoldChange	pValue	qValue	Regulation	Expression_B1	Expression_B2	Expression_B3	Expression_C1	Expression_C2	Expression_C3	circRNA_Chr	circRNA_Strand	circRNA_Start	circRNA_End	genomic_length	circRNA_length	Type	best.transcript	transcript_position	gene	Dbxref	product	GO_id	GO_term	pathway	pathway_description
circRNA_0858|Chr10:16769713_16774652_-	2.620480718	0	5.240961436	Inf	Inf	0.021473548	1	Up	0	0	0	0.050839671	0.021205773	0.088256864	Chr10	-	16769713	16774652	4940	727	sense-overlapping	NM_053578.3	Chr10:16769857_16792930_-	Atp6v0e1	GeneID:94170,Genbank:NM_053578.3,RGD:621393	ATPase H+ transporting V0 subunit e1	GO:0016020,GO:0016021,GO:0033179,GO:0043200,GO:0046961,GO:0055085,GO:1902600,GO:0003674,GO:0005575,GO:0015991	membrane|integral component of membrane|proton-transporting V-type ATPase, V0 domain|response to amino acid|proton-transporting ATPase activity, rotational mechanism|transmembrane transport|proton transmembrane transport|molecular_function|cellular_component|ATP hydrolysis coupled proton transport	rno00190,rno04145,rno04966,rno04721,rno05323	Oxidative phosphorylation|Phagosome|Collecting duct acid secretion|Synaptic vesicle cycle|Rheumatoid arthritis
circRNA_2663|Chr17:24052253_24058139_-	3.254646992	6.509293985	0	0	#NAME?	0.010443878	1	Down	0.073571572	0.072420307	0.072057178	0	0	0	Chr17	-	24052253	24058139	5887	244	sense-overlapping	XM_008771586.1	Chr17:24020874_24103771_-	Ranbp9	GeneID:364686,Genbank:XM_008771586.1,RGD:1561940	RAN binding protein 9, transcript variant X1	GO:0019899,GO:0070373,GO:0005515,GO:0005634,GO:0005737	enzyme binding|negative regulation of ERK1 and ERK2 cascade|protein binding|nucleus|cytoplasm
circRNA_3112|Chr19:15151107_15207439_+	15.50409608	1.811138166	29.19705399	16.12083194	4.010854293	0.025914704	1	Up	0.073571572	0	0	0.416885303	0.455924109	0	Chr19	+	15151107	15207439	56333	44991	sense-overlapping	NM_133295.3	Chr19:15195514_15239827_+	Ces1d	GeneID:113902,Genbank:NM_133295.3,RGD:70896	carboxylesterase 1D	GO:0052689,GO:0019626,GO:0005811,GO:0004771,GO:0030339,GO:0005829,GO:0004806,GO:0030855,GO:0034379,GO:0005615,GO:0005783,GO:0005788,GO:0006695,GO:0046464,GO:0016042,GO:0016787,GO:0051791	carboxylic ester hydrolase activity|short-chain fatty acid catabolic process|lipid droplet|sterol esterase activity|fatty-acyl-ethyl-ester synthase activity|cytosol|triglyceride lipase activity|epithelial cell differentiation|very-low-density lipoprotein particle assembly|extracellular space|endoplasmic reticulum|endoplasmic reticulum lumen|cholesterol biosynthetic process|acylglycerol catabolic …	rno00983	Drug metabolism - other enzymes
circRNA_3235|Chr19:43899905_43908769_-	5.693345088	0	11.38669018	Inf	Inf	0.006705774	1	Up	0	0	0	0	0.190851953	0.154449512	Chr19	-	43899905	43908769	8865	7179	sense-overlapping	NM_012536.1	Chr19:43906344_43911020_-	Ctrb1	GeneID:24291,Genbank:NM_012536.1,RGD:2444	chymotrypsinogen B1	GO:0043434,GO:0005615,GO:0005737,GO:0005764,GO:0006508,GO:0007584,GO:0007586,GO:0008233,GO:0009636,GO:0030163,GO:0032094,GO:0004252,GO:0034097,GO:0043065,GO:0005515	response to peptide hormone|extracellular space|cytoplasm|lysosome|proteolysis|response to nutrient|digestion|peptidase activity|response to toxic substance|protein catabolic process|response to food|serine-type endopeptidase activity|response to cytokine|positive regulation of apoptotic process|protein binding	rno04972,rno04974	Pancreatic secretion|Protein digestion and absorption
circRNA_3346|Chr2:25924932_25927179_-	3.250740448	6.501480897	0	0	#NAME?	0.01047772	1	Down	0.063061347	0.113803339	0.04117553	0	0	0	Chr2	-	25924932	25927179	2248	442	sense-overlapping	NM_001108542.1	Chr2:25738514_26011429_-	Arhgef28	GeneID:361882,Genbank:NM_001108542.1,RGD:1307061	Rho guanine nucleotide exchange factor 28	GO:0005737,GO:0005886,GO:0021955,GO:0035023,GO:0035556,GO:0046872,GO:0060052,GO:0003723,GO:0005085,GO:0005089	cytoplasm|plasma membrane|central nervous system neuron axonogenesis|regulation of Rho protein signal transduction|intracellular signal transduction|metal ion binding|neurofilament cytoskeleton organization|RNA binding|guanyl-nucleotide exchange factor activity|Rho guanyl-nucleotide exchange factor activity
circRNA_3868|Chr20:3149832_3170181_+	7.467267854	0	14.93453571	Inf	Inf	0.004308717	1	Up	0	0	0	0.19319075	0	0.264770592	Chr20	+	3149832	3170181	20350	18553	sense-overlapping	XM_006255908.3	Chr20:3166793_3170474_+	RT1-N3	GeneID:24750,Genbank:XM_006255908.3,RGD:1598370	RT1 class Ib, locus N3, transcript variant X1	GO:0016021,GO:0042605,GO:0002474,GO:0005102,GO:0005886	integral component of membrane|peptide antigen binding|antigen processing and presentation of peptide antigen via MHC class I|signaling receptor binding|plasma membrane	rno04514,rno04144,rno04145,rno04218,rno04650,rno04612,rno05203,rno05320,rno05330,rno05332,rno05416,rno04940,rno05166,rno05168,rno05167,rno05169,rno05165	Cell adhesion molecules (CAMs)|Endocytosis|Phagosome|Cellular senescence|Natural killer cell mediated cytotoxicity|Antigen processing and presentation|Viral carcinogenesis|Autoimmune thyroid disease|Allograft rejection|Graft-versus-host disease|Viral myocarditis|Type I diabetes mellitus|HTLV-I infection|Herpes simplex infection|Kaposi's sarcoma-associated herpesvirus infection|Epstein-Barr virus …
circRNA_3949|Chr20:20259263_20276110_+	2.999996633	0	5.999993265	Inf	Inf	0.012019532	1	Up	0	0	0	0.030503803	0.106028863	0.044128432	Chr20	+	20259263	20276110	16848	708	sense-overlapping	NM_001033984.1	Chr20:20105047_20471282_+	Ank3	GeneID:361833,Genbank:NM_001033984.1,RGD:620157	ankyrin 3, node of Ranvier (ankyrin G), transcript variant 2	GO:0007165,GO:0007409,GO:0007411,GO:0007528,GO:0008092,GO:0009925,GO:0009986,GO:0030018,GO:0010628,GO:0030315,GO:0010650,GO:0030424,GO:0010765,GO:0030425,GO:0030507,GO:0030674,GO:0031594,GO:0044325,GO:0033268,GO:0045184,GO:0033270,GO:0045202,GO:0045211,GO:0045296,GO:0045838,GO:0000281,GO:1902260,GO:0050808,GO:0005200,GO:0071286,GO:0005515,GO:2000651,GO:0005764,GO:2001259,GO:0005886,GO:0005923,GO:…	signal transduction|axonogenesis|axon guidance|neuromuscular junction development|cytoskeletal protein binding|basal plasma membrane|cell surface|Z disc|positive regulation of gene expression|T-tubule|positive regulation of cell communication by electrical coupling|axon|positive regulation of sodium ion transport|dendrite|spectrin binding|protein binding, bridging|neuromuscular junction|ion chann…	rno05205	Proteoglycans in cancer
circRNA_4253|Chr3:67723614_67757148_-	112.931224	0	225.862448	Inf	Inf	1.19E-59	7.07E-56	Up	0	0	0	2.450472145	2.088768594	2.305710568	Chr3	-	67723614	67757148	33535	4379	sense-overlapping	NM_031618.1	Chr3:67725180_67804680_-	Nckap1	GeneID:58823,Genbank:NM_031618.1,RGD:61939	NCK-associated protein 1	GO:0010172,GO:0010592,GO:0016021,GO:0016477,GO:0016601,GO:0035050,GO:0030027,GO:0042074,GO:0030031,GO:0044877,GO:0030032,GO:0045175,GO:0045176,GO:0048339,GO:0048340,GO:0048365,GO:0000902,GO:0001701,GO:0001726,GO:0001756,GO:0001843,GO:0005515,GO:0007354,GO:0007492,GO:0008078,GO:0030838,GO:0030866,GO:0030903,GO:0030950,GO:0031209,GO:0048570,GO:0031258,GO:0048617,GO:0031941,GO:0048812,GO:0032880,GO:…	embryonic body morphogenesis|positive regulation of lamellipodium assembly|integral component of membrane|cell migration|Rac protein signal transduction|embryonic heart tube development|lamellipodium|cell migration involved in gastrulation|cell projection assembly|protein-containing complex binding|lamellipodium assembly|basal protein localization|apical protein localization|paraxial mesoderm dev…	rno04810	Regulation of actin cytoskeleton
circRNA_4464|Chr3:152985421_153050014_-	3.246317996	6.492635992	0	0	#NAME?	0.015239856	1	Down	0.136632919	0	0.092644943	0	0	0	Chr3	-	152985421	153050014	64594	21993	sense-overlapping	NM_001013923.1	Chr3:152972055_153099089_-	Ndrg3	GeneID:296318,Genbank:NM_001013923.1,RGD:1359424	NDRG family member 3	GO:0007165,GO:0005737	signal transduction|cytoplasm
circRNA_4873|Chr4:147527096_147528435_+	2.668518384	5.337036768	0	0	#NAME?	0.025805092	1	Down	0.042040898	0.093111823	0.04117553	0	0	0	Chr4	+	147527096	147528435	1340	326	sense-overlapping	XM_017592582.1	Chr4:147514041_147531430_+	Mkrn2	GeneID:297525,Genbank:XM_017592582.1,RGD:1310618	makorin, ring finger protein, 2, transcript variant X1	GO:0005622,GO:0046872	intracellular|metal ion binding
circRNA_4895|Chr4:152465373_152468818_-	2.288582679	0	4.577165358	Inf	Inf	0.037079147	1	Up	0	0	0	0.030503803	0.08482309	0.022064216	Chr4	-	152465373	152468818	3446	927	sense-overlapping	XM_017592389.1	Chr4:152452211_152578469_-	Wnk1	GeneID:116477,Genbank:XM_017592389.1,RGD:621141	WNK lysine deficient protein kinase 1, transcript variant X8	GO:0005524,GO:0005737,GO:0005829,GO:0019901,GO:0006468,GO:0019902,GO:0023016,GO:0030291,GO:0030295,GO:0032147,GO:0032414,GO:0033673,GO:0000287,GO:0002028,GO:0003084,GO:0004672,GO:0004674,GO:0005515,GO:0006811,GO:0010766,GO:0010923,GO:0035556,GO:0016020,GO:0019869,GO:0019870,GO:0046777,GO:0050794,GO:0071277,GO:0071901,GO:0090188,GO:0090263	ATP binding|cytoplasm|cytosol|protein kinase binding|protein phosphorylation|phosphatase binding|signal transduction by trans-phosphorylation|protein serine/threonine kinase inhibitor activity|protein kinase activator activity|activation of protein kinase activity|positive regulation of ion transmembrane transporter activity|negative regulation of kinase activity|magnesium ion binding|regulation …
circRNA_4915|Chr4:157436084_157436320_-	2.431527391	0	4.863054782	Inf	Inf	0.028694218	1	Up	0	0	0	0.071175539	0.074220204	0	Chr4	-	157436084	157436320	237	87	sense-overlapping	NM_031975.2	Chr4:157435371_157439507_-	Ptms	GeneID:83801,Genbank:NM_031975.2,RGD:621529	parathymosin	GO:0008270,GO:0043086,GO:0002376,GO:0004857,GO:0005829	zinc ion binding|negative regulation of catalytic activity|immune system process|enzyme inhibitor activity|cytosol
circRNA_4917|Chr4:157436084_157436371_-	10.79688454	17.69217634	3.90159274	0.220526444	-2.180976429	0.00813629	1	Down	0.32581696	0.175877888	0.12352659	0	0	0.121353188	Chr4	-	157436084	157436371	288	138	sense-overlapping	NM_031975.2	Chr4:157435371_157439507_-	Ptms	GeneID:83801,Genbank:NM_031975.2,RGD:621529	parathymosin	GO:0008270,GO:0043086,GO:0002376,GO:0004857,GO:0005829	zinc ion binding|negative regulation of catalytic activity|immune system process|enzyme inhibitor activity|cytosol
circRNA_5485|Chr5:167014847_167016955_-	3.01619546	6.03239092	0	0	#NAME?	0.015693745	1	Down	0.042040898	0.093111823	0.061763295	0	0	0	Chr5	-	167014847	167016955	2109	755	sense-overlapping	XM_006239459.3	Chr5:166994683_167025264_-	H6pd	GeneID:298655,Genbank:XM_006239459.3,RGD:1306562	hexose-6-phosphate dehydrogenase (glucose 1-dehydrogenase), transcript variant X1	GO:0005739,GO:0005975,GO:0006006,GO:0006098,GO:0006739,GO:0017057,GO:0030246,GO:0043231,GO:0050661,GO:0055114,GO:0097305,GO:0004345,GO:0005737	mitochondrion|carbohydrate metabolic process|glucose metabolic process|pentose-phosphate shunt|NADP metabolic process|6-phosphogluconolactonase activity|carbohydrate binding|intracellular membrane-bounded organelle|NADP binding|oxidation-reduction process|response to alcohol|glucose-6-phosphate dehydrogenase activity|cytoplasm	rno00030	Pentose phosphate pathway
circRNA_5944|Chr6:133777712_133795645_+	2.547198323	5.094396646	0	0	#NAME?	0.028547341	1	Down	0.073571572	0.082766065	0.020587765	0	0	0	Chr6	+	133777712	133795645	17934	17934	intergenic
circRNA_5963|Chr6:133791092_133795645_+	2.979770885	5.959541769	0	0	#NAME?	0.014578682	1	Down	0.094592021	0.082766065	0.030881648	0	0	0	Chr6	+	133791092	133795645	4554	4554	intergenic
circRNA_6631|Chr8:78521649_78538216_-	2.247899317	4.495798634	0	0	#NAME?	0.045124037	1	Down	0.073571572	0.041383033	0.04117553	0	0	0	Chr8	-	78521649	78538216	16568	239	sense-overlapping	XM_006243351.1	Chr8:78343634_78538216_-	Tcf12	GeneID:25720,Genbank:XM_006243351.1,RGD:3829	transcription factor 12, transcript variant X8	GO:0005634,GO:0005654,GO:0005667,GO:0005737,GO:0006366,GO:0045893,GO:0008134,GO:0045944,GO:0010628,GO:0016607,GO:0046332,GO:0046982,GO:0046983,GO:0070888,GO:0000790,GO:0000978,GO:0001077,GO:0003677,GO:0003700,GO:0035497,GO:0042803,GO:0043231,GO:0043425,GO:0044212,GO:0045666,GO:0071837,GO:0090575	nucleus|nucleoplasm|transcription factor complex|cytoplasm|transcription by RNA polymerase II|positive regulation of transcription, DNA-templated|transcription factor binding|positive regulation of transcription by RNA polymerase II|positive regulation of gene expression|nuclear speck|SMAD binding|protein heterodimerization activity|protein dimerization activity|E-box binding|nuclear chromatin|RN…
circRNA_6844|Chr9:11209034_11219449_-	2.986567072	0	5.973134144	Inf	Inf	0.012137992	1	Up	0	0	0	0.040671737	0.053014431	0.088256864	Chr9	-	11209034	11219449	10416	737	sense-overlapping	XM_017596273.1	Chr9:11165006_11219449_-	Uxs1	GeneID:246232,Genbank:XM_017596273.1,RGD:628680	UDP-glucuronate decarboxylase 1, transcript variant X6	GO:0032580,GO:0033320,GO:0042803,GO:0048040,GO:0051262,GO:0070403,GO:0005737,GO:0005794,GO:0016021	Golgi cisterna membrane|UDP-D-xylose biosynthetic process|protein homodimerization activity|UDP-glucuronate decarboxylase activity|protein tetramerization|NAD+ binding|cytoplasm|Golgi apparatus|integral component of membrane	rno00520	Amino sugar and nucleotide sugar metabolism
