# Supplementary material for: Comprehensive Analysis of the Profiles of Differentially Expressed mRNAs, lncRNAs, and circRNAs in Phosgene-Induced Acute Lung Injury
Source: Biomed Res Int. 2021 Jan 9;2021:6278526. doi: 10.1155/2021/6278526 (PMC7811572; doi:10.1155/2021/6278526)
Supplement: Supplementary 7 — Table S7: differentially expressed mRNAs between A and C group. [file 6278526.f7.txt]

Table S7 Differentially expressed mRNAs between A and C group
gene_id	BaseMean	BaseMean_control_A	BaseMean_case_C	FoldChange	log2FoldChange	pValue	qValue	Regulation	Expression_A1	Expression_A2	Expression_A3	Expression_C1	Expression_C2	Expression_C3	Dbxref	product	GO_id	GO_term	pathway	pathway_description
Acvr1c	66.74581876	91.66159115	41.83004636	0.456353046	-1.131777733	0.001264559	0.382039722	Down	1.33017	0.882587	0.840479	0.3714	0.498499	0.474206	GeneID:245921,Genbank:NM_139090.1,RGD:621789	activin A receptor type 1C	GO:0005886,GO:0006468,GO:0007181,GO:0007368,GO:0009749,GO:0023014,GO:0030154,GO:0009986,GO:0014070,GO:0030262,GO:0030901,GO:0046676,GO:0032868,GO:0046872,GO:0048179,GO:0033993,GO:0048185,GO:0001541,GO:0070700,GO:0001701,GO:1901164,GO:0002021,GO:0004674,GO:0004702,GO:0005524,GO:0005737,GO:0016361,GO:0019838,GO:0019915,GO:0038092,GO:0021549,GO:0038100,GO:0021766,GO:0042493,GO:0042981,GO:0043280,GO:…	plasma membrane|protein phosphorylation|transforming growth factor beta receptor complex assembly|determination of left/right symmetry|response to glucose|signal transduction by protein phosphorylation|cell differentiation|cell surface|response to organic cyclic compound|apoptotic nuclear changes|midbrain development|negative regulation of insulin secretion|response to insulin|metal ion binding|a…	rno04350,rno04550	TGF-beta signaling pathway|Signaling pathways regulating pluripotency of stem cells
Adipoq	488.203741	806.928603	169.478879	0.210029584	-2.251335538	3.20E-30	5.99E-26	Down	12.4133	12.0334	13.2373	2.79178	2.25067	2.69306	GeneID:246253,Genbank:NM_144744.3,RGD:628748	adiponectin, C1Q and collagen domain containing	GO:0050805,GO:0050873,GO:0051260,GO:0071944,GO:0051384,GO:0072659,GO:0051899,GO:0060081,GO:0090317,GO:1900121,GO:2000584,GO:1904706,GO:2000590,GO:1904753,GO:0005615,GO:0005783,GO:0006006,GO:0006635,GO:0010739,GO:0007584,GO:0010745,GO:0007623,GO:0010804,GO:0010875,GO:0031953,GO:0032270,GO:0010906,GO:0032720,GO:0032757,GO:0001666,GO:0034612,GO:0032869,GO:0001934,GO:0035690,GO:0005102,GO:0042493,GO:…	negative regulation of synaptic transmission|brown fat cell differentiation|protein homooligomerization|cell periphery|response to glucocorticoid|protein localization to plasma membrane|membrane depolarization|membrane hyperpolarization|negative regulation of intracellular protein transport|negative regulation of receptor binding|negative regulation of platelet-derived growth factor receptor-alph…	rno04152,rno04920,rno03320,rno04211,rno04930,rno04932	AMPK signaling pathway|Adipocytokine signaling pathway|PPAR signaling pathway|Longevity regulating pathway - mammal|Type II diabetes mellitus|Non-alcoholic fatty liver disease (NAFLD)
Adrb3	38.24018137	63.90766718	12.57269556	0.196732194	-2.345695032	7.48E-07	0.002002382	Down	0.591474	0.589517	0.76824	0.0948062	0.109409	0.17231	GeneID:25645,Genbank:XM_008771315.2,RGD:2061	adrenoceptor beta 3	GO:0005887,GO:0006898,GO:0007188,GO:0007189,GO:0007190,GO:0042803,GO:0007267,GO:0007568,GO:0043235,GO:0007610,GO:0043410,GO:0046677,GO:0050873,GO:0051379,GO:0001659,GO:0002024,GO:0002025,GO:0002032,GO:0004935,GO:0004939,GO:0005634,GO:0009409,GO:0015052,GO:0016020,GO:0031649,GO:0051380,GO:0031699,GO:0040015,GO:0042755,GO:0071880	integral component of plasma membrane|receptor-mediated endocytosis|adenylate cyclase-modulating G-protein coupled receptor signaling pathway|adenylate cyclase-activating G-protein coupled receptor signaling pathway|activation of adenylate cyclase activity|protein homodimerization activity|cell-cell signaling|aging|receptor complex|behavior|positive regulation of MAPK cascade|response to antibiot…	rno04020,rno04022,rno04080,rno04923,rno04924,rno04970,rno04714	Calcium signaling pathway|cGMP - PKG signaling pathway|Neuroactive ligand-receptor interaction|Regulation of lipolysis in adipocyte|Renin secretion|Salivary secretion|Thermogenesis
Agt	656.0828131	976.2439684	335.9216577	0.344096013	-1.539116917	0.002554239	0.605613188	Down	7.59958	9.54929	16.3317	3.07785	3.97401	3.86711	GeneID:24179,Genbank:XM_008772597.2,RGD:2069	angiotensinogen	GO:0070471,GO:0071260,GO:0090190,GO:0097755,GO:1900020,GO:1901201,GO:1903598,GO:1903779,GO:1904385,GO:1904707,GO:0002018,GO:0002019,GO:0002027,GO:0002035,GO:0003014,GO:0003051,GO:0007186,GO:0003331,GO:0004867,GO:0007202,GO:0005179,GO:0007204,GO:0007250,GO:0007565,GO:0007568,GO:0010666,GO:0007588,GO:0010873,GO:0008065,GO:0010951,GO:0008217,GO:0010976,GO:0014061,GO:0014068,GO:0001543,GO:0032930,GO:…	uterine smooth muscle contraction|cellular response to mechanical stimulus|positive regulation of branching involved in ureteric bud morphogenesis|positive regulation of blood vessel diameter|positive regulation of protein kinase C activity|regulation of extracellular matrix assembly|positive regulation of gap junction assembly|regulation of cardiac conduction|cellular response to angiotensin|pos…	rno04924,rno04614,rno04270,rno05410	Renin secretion|Renin-angiotensin system|Vascular smooth muscle contraction|Hypertrophic cardiomyopathy (HCM)
Angptl8	51.55271121	73.62738123	29.4780412	0.400367916	-1.320601728	0.018349362	1	Down	1.06776	2.35608	2.83791	0.877726	0.46295	1.14318	GeneID:100361444,Genbank:NM_001271710.1,RGD:2320121	angiopoietin-like 8	GO:0006006,GO:0010469,GO:0010954,GO:0019216,GO:0044255,GO:0044342,GO:0045444,GO:0048469,GO:0050746,GO:0070328,GO:0005179,GO:0005576	glucose metabolic process|regulation of signaling receptor activity|positive regulation of protein processing|regulation of lipid metabolic process|cellular lipid metabolic process|type B pancreatic cell proliferation|fat cell differentiation|cell maturation|regulation of lipoprotein metabolic process|triglyceride homeostasis|hormone activity|extracellular region	rno04979	Cholesterol metabolism
Apod	11.71302471	18.62665461	4.799394814	0.257662737	-1.956444183	0.030472526	1	Down	0.715917	0.278172	0.313385	0.0529572	0.193543	0.0867633	GeneID:25239,Genbank:NM_012777.1,RGD:2137	apolipoprotein D	GO:0005737,GO:0005783,GO:0006006,GO:0006629,GO:0030425,GO:0042246,GO:0006869,GO:0042308,GO:0007420,GO:0042493,GO:0043025,GO:0071638,GO:0048471,GO:1900016,GO:2000098,GO:0000302,GO:2000405,GO:0003674,GO:0005576,GO:0005615,GO:0005622,GO:0007568,GO:0010642,GO:0014012,GO:0015485,GO:0048662,GO:0022626,GO:0048678,GO:0051895,GO:0060588	cytoplasm|endoplasmic reticulum|glucose metabolic process|lipid metabolic process|dendrite|tissue regeneration|lipid transport|negative regulation of protein import into nucleus|brain development|response to drug|neuronal cell body|negative regulation of monocyte chemotactic protein-1 production|perinuclear region of cytoplasm|negative regulation of cytokine production involved in inflammatory re…
Aqp7	49.16306102	79.89708172	18.42904033	0.230659743	-2.116161863	0.000675577	0.248903779	Down	0.432132	0.796276	1.10787	0.121067	0.169286	0.23354	GeneID:29171,Genbank:XM_017593195.1,RGD:2145	aquaporin 7	GO:0015793,GO:0005886,GO:0015840,GO:0005911,GO:0016021,GO:0006833,GO:0007283,GO:0015204,GO:0015250,GO:0031526,GO:0042493,GO:0070295,GO:0015254,GO:0071918,GO:0005737,GO:0015265	glycerol transport|plasma membrane|urea transport|cell-cell junction|integral component of membrane|water transport|spermatogenesis|urea transmembrane transporter activity|water channel activity|brush border membrane|response to drug|renal water absorption|glycerol channel activity|urea transmembrane transport|cytoplasm|urea channel activity	rno04923,rno03320	Regulation of lipolysis in adipocyte|PPAR signaling pathway
Arpp21	67.58355035	96.01849133	39.14860937	0.40771948	-1.294351207	0.047136587	1	Down	0.0466391	0.0656861	0.146905	0.0384139	0.0281605	0.0402352	GeneID:363153,Genbank:XM_006243975.3,RGD:1593239	cAMP regulated phosphoprotein 21	GO:0003676,GO:0034605	nucleic acid binding|cellular response to heat
Atp5f1	49.30367227	78.23706261	20.37028193	0.260366139	-1.941386258	0.010248735	1	Down	2.41465	1.72226	1.50114	0.78369	0.764662	0.765084	GeneID:171375,Genbank:NM_134365.2,RGD:620041	ATP synthase, H+ transporting, mitochondrial Fo complex, subunit B1	GO:0005739,GO:0005753,GO:0015986,GO:0016887,GO:0043209,GO:0046034,GO:0046933,GO:0099132,GO:0000276,GO:0005654	mitochondrion|mitochondrial proton-transporting ATP synthase complex|ATP synthesis coupled proton transport|ATPase activity|myelin sheath|ATP metabolic process|proton-transporting ATP synthase activity, rotational mechanism|ATP hydrolysis coupled cation transmembrane transport|mitochondrial proton-transporting ATP synthase complex, coupling factor F(o)|nucleoplasm	rno00190,rno04714,rno05010,rno05012,rno05016	Oxidative phosphorylation|Thermogenesis|Alzheimer's disease|Parkinson's disease|Huntington's disease
Atp6v1b1	44.13415062	59.52933341	28.73896783	0.482769858	-1.050592492	0.039763425	1	Down	0.563529	0.387642	0.216712	0.174306	0.220689	0.156358	GeneID:312488,Genbank:NM_001107867.2,RGD:1310619	ATPase H+ transporting V1 subunit B1	GO:0006885,GO:0007588,GO:0007605,GO:0008021,GO:0033180,GO:0008150,GO:0042472,GO:0015078,GO:0044877,GO:0045177,GO:0045851,GO:0046034,GO:0055074,GO:0001503,GO:0005524,GO:0005737,GO:0005829,GO:0005902,GO:0015991,GO:0016020,GO:0016323,GO:0016324,GO:0016328,GO:0097401,GO:0016471,GO:0098850,GO:1902600	regulation of pH|excretion|sensory perception of sound|synaptic vesicle|proton-transporting V-type ATPase, V1 domain|biological_process|inner ear morphogenesis|proton transmembrane transporter activity|protein-containing complex binding|apical part of cell|pH reduction|ATP metabolic process|calcium ion homeostasis|ossification|ATP binding|cytoplasm|cytosol|microvillus|ATP hydrolysis coupled proto…	rno00190,rno04150,rno04145,rno04966,rno04721,rno05323	Oxidative phosphorylation|mTOR signaling pathway|Phagosome|Collecting duct acid secretion|Synaptic vesicle cycle|Rheumatoid arthritis
Bmp10	5.772337766	11.54467553	0	0	#NAME?	0.011630506	1	Down	0	0.3199	0.173066	0	0	0	GeneID:500245,Genbank:NM_001031824.1,RGD:1562986	bone morphogenetic protein 10	GO:0005737,GO:0007155,GO:0007507,GO:0007512,GO:0008083,GO:0009986,GO:0030018,GO:0010469,GO:0030308,GO:0010596,GO:0030336,GO:0030509,GO:0055009,GO:0031433,GO:0055010,GO:0055015,GO:0055117,GO:0003674,GO:0061036,GO:0005125,GO:1903242,GO:0060038,GO:0005160,GO:0005179,GO:2000138,GO:0005575,GO:0005615,GO:0010613,GO:0010614,GO:0010628,GO:0032924,GO:0010862,GO:0033612,GO:0042981,GO:0043408,GO:0045214,GO:…	cytoplasm|cell adhesion|heart development|adult heart development|growth factor activity|cell surface|Z disc|regulation of signaling receptor activity|negative regulation of cell growth|negative regulation of endothelial cell migration|negative regulation of cell migration|BMP signaling pathway|atrial cardiac muscle tissue morphogenesis|telethonin binding|ventricular cardiac muscle tissue morphog…
Bpifa1	13168.59391	20163.54114	6173.646673	0.306178693	-1.707554206	0.00411009	0.819001035	Down	798.67	432.706	372.688	87.9368	215.967	159.534	GeneID:246238,Genbank:NM_172031.1,RGD:619818	BPI fold containing family A, member 1	GO:0050891,GO:0005576,GO:0051607,GO:0005615,GO:0005902,GO:0008289,GO:0019731,GO:0061844,GO:1900229,GO:0031640,GO:0045087,GO:1902305,GO:0002395,GO:0050828,GO:0002675,GO:0003674	multicellular organismal water homeostasis|extracellular region|defense response to virus|extracellular space|microvillus|lipid binding|antibacterial humoral response|antimicrobial humoral immune response mediated by antimicrobial peptide|negative regulation of single-species biofilm formation in or on host organism|killing of cells of other organism|innate immune response|regulation of sodium io…
Car3	1049.509708	1731.059348	367.9600687	0.21256352	-2.23403407	0.001646516	0.467286371	Down	29.9894	22.4266	10.3339	3.99752	5.35467	3.57913	GeneID:54232,Genbank:XM_006232116.1,RGD:2241	carbonic anhydrase 3	GO:0006730,GO:0006979,GO:0008270,GO:0016151,GO:0016311,GO:0016791,GO:0045471,GO:0004089,GO:0005829	one-carbon metabolic process|response to oxidative stress|zinc ion binding|nickel cation binding|dephosphorylation|phosphatase activity|response to ethanol|carbonate dehydratase activity|cytosol	rno00910	Nitrogen metabolism
Cd3e	129.3295749	176.7911938	81.86795591	0.463077115	-1.110675635	0.017779516	1	Down	1.32448	1.74736	2.84304	1.3568	0.598877	0.760953	GeneID:315609,Genbank:XM_008766161.2,RGD:1309222	CD3e molecule	GO:0007584,GO:0009897,GO:0010628,GO:0010629,GO:0016021,GO:0016358,GO:0017124,GO:0045086,GO:0021549,GO:0045879,GO:0031295,GO:0046641,GO:0032729,GO:0046649,GO:0046982,GO:0050731,GO:0050850,GO:0050852,GO:0050870,GO:0051260,GO:0001772,GO:0002669,GO:0003674,GO:0004871,GO:0004888,GO:0005575,GO:0005886,GO:0005911,GO:0007166,GO:0032753,GO:0033077,GO:0042101,GO:0042102,GO:0042105,GO:0042803,GO:0097190,GO:…	response to nutrient|external side of plasma membrane|positive regulation of gene expression|negative regulation of gene expression|integral component of membrane|dendrite development|SH3 domain binding|positive regulation of interleukin-2 biosynthetic process|cerebellum development|negative regulation of smoothened signaling pathway|T cell costimulation|positive regulation of alpha-beta T cell p…	rno04640,rno04660,rno04658,rno04659,rno05340,rno05166,rno05162,rno05142	Hematopoietic cell lineage|T cell receptor signaling pathway|Th1 and Th2 cell differentiation|Th17 cell differentiation|Primary immunodeficiency|HTLV-I infection|Measles|Chagas disease (American trypanosomiasis)
Cd3g	106.2572972	149.424966	63.08962847	0.422216114	-1.243946454	0.001588953	0.457887416	Down	2.87625	3.94503	5.09039	2.3629	1.19539	1.26469	GeneID:300678,Genbank:XM_006242932.3,RGD:1307718	CD3g molecule	GO:0051260,GO:0016021,GO:0004888,GO:0070228,GO:0042105,GO:0005575,GO:0007163,GO:0007166,GO:0042803,GO:0046982,GO:0008150,GO:0015031,GO:0002250,GO:0003674	protein homooligomerization|integral component of membrane|transmembrane signaling receptor activity|regulation of lymphocyte apoptotic process|alpha-beta T cell receptor complex|cellular_component|establishment or maintenance of cell polarity|cell surface receptor signaling pathway|protein homodimerization activity|protein heterodimerization activity|biological_process|protein transport|adaptive…	rno04640,rno04660,rno04658,rno04659,rno05166,rno05162,rno05142	Hematopoietic cell lineage|T cell receptor signaling pathway|Th1 and Th2 cell differentiation|Th17 cell differentiation|HTLV-I infection|Measles|Chagas disease (American trypanosomiasis)
Cdh19	32.83280363	45.21268804	20.45291922	0.452371228	-1.144420921	0.03737701	1	Down	0.243008	0.117543	0.154618	0.105836	0.0641323	0.078099	GeneID:360835,Genbank:XM_017598844.1,RGD:1307169	cadherin 19	GO:0042803,GO:0005886,GO:0044331,GO:0045296,GO:0005913,GO:0007043,GO:0007156,GO:0007275,GO:0008092,GO:0009986,GO:0016021,GO:0016339,GO:0000902,GO:0016342,GO:0005509,GO:0034332	protein homodimerization activity|plasma membrane|cell-cell adhesion mediated by cadherin|cadherin binding|cell-cell adherens junction|cell-cell junction assembly|homophilic cell adhesion via plasma membrane adhesion molecules|multicellular organism development|cytoskeletal protein binding|cell surface|integral component of membrane|calcium-dependent cell-cell adhesion via plasma membrane cell ad…
Cfd	455.3671744	632.3518089	278.38254	0.440233642	-1.183658696	5.80E-06	0.009424869	Down	27.6341	20.3916	18.4127	9.45583	9.74316	7.56857	GeneID:54249,Genbank:NM_001077642.1,RGD:2498	complement factor D	GO:0005615,GO:0006508,GO:0006957,GO:0007219,GO:0004175,GO:0004252	extracellular space|proteolysis|complement activation, alternative pathway|Notch signaling pathway|endopeptidase activity|serine-type endopeptidase activity	rno04610,rno05150	Complement and coagulation cascades|Staphylococcus aureus infection
Chst4	206.4384422	290.9034912	121.9733932	0.41929161	-1.253974133	1.50E-06	0.003115737	Down	1.43938	1.05805	1.58423	0.631331	0.331977	0.65742	GeneID:307838,Genbank:XM_006255587.3,RGD:1310798	carbohydrate sulfotransferase 4	GO:0005802,GO:0005975,GO:0006044,GO:0006477,GO:0006790,GO:0016021,GO:0018146,GO:0050901,GO:0000139,GO:0001517	trans-Golgi network|carbohydrate metabolic process|N-acetylglucosamine metabolic process|protein sulfation|sulfur compound metabolic process|integral component of membrane|keratan sulfate biosynthetic process|leukocyte tethering or rolling|Golgi membrane|N-acetylglucosamine 6-O-sulfotransferase activity	rno00533	Glycosaminoglycan biosynthesis - keratan sulfate
Cidea	185.215569	280.7895788	89.64155918	0.31924817	-1.647249745	0.000542187	0.230811361	Down	4.23063	6.78537	9.52979	1.47603	2.25968	2.40031	GeneID:291541,Genbank:NM_001170467.1,RGD:1305106	cell death-inducing DFFA-like effector a	GO:0035634,GO:0005737,GO:0042803,GO:0005739,GO:0042981,GO:0005740,GO:0005811,GO:0006629,GO:0006915,GO:0050710,GO:0008150,GO:0050995,GO:0008219,GO:1900118,GO:0010890,GO:1902510,GO:0019915,GO:0001659,GO:0030512,GO:0003674,GO:0032720,GO:0005634	response to stilbenoid|cytoplasm|protein homodimerization activity|mitochondrion|regulation of apoptotic process|mitochondrial envelope|lipid droplet|lipid metabolic process|apoptotic process|negative regulation of cytokine secretion|biological_process|negative regulation of lipid catabolic process|cell death|negative regulation of execution phase of apoptosis|positive regulation of sequestering …
Cidec	361.8855507	531.4218168	192.3492847	0.361952179	-1.466128992	3.52E-13	2.20E-09	Down	5.84131	6.28674	7.66577	1.87608	2.18334	2.73877	GeneID:500292,Genbank:NM_001244798.1,RGD:1562113	cell death-inducing DFFA-like effector c	GO:0005811,GO:0005829,GO:0006351,GO:0006355,GO:0006915,GO:0034389,GO:0042981,GO:0097194,GO:0005622,GO:0005634,GO:0005783	lipid droplet|cytosol|transcription, DNA-templated|regulation of transcription, DNA-templated|apoptotic process|lipid particle organization|regulation of apoptotic process|execution phase of apoptosis|intracellular|nucleus|endoplasmic reticulum
Clca1	1359.282178	2035.091132	683.4732229	0.335844038	-1.574136678	0.008072251	1	Down	14.9117	8.61473	7.23648	2.80366	5.08562	2.03543	GeneID:308015,Genbank:NM_001107449.1,RGD:1306258	chloride channel accessory 1	GO:0005902,GO:0016021,GO:0030141,GO:0042589,GO:0071456,GO:1902476,GO:0003674,GO:0005229,GO:0005887	microvillus|integral component of membrane|secretory granule|zymogen granule membrane|cellular response to hypoxia|chloride transmembrane transport|molecular_function|intracellular calcium activated chloride channel activity|integral component of plasma membrane	rno04924,rno04972	Renin secretion|Pancreatic secretion
Clcn4	83.21012705	111.2046313	55.21562278	0.496522691	-1.010068445	0.001986132	0.509619724	Down	0.300322	0.370694	0.435864	0.22698	0.100962	0.207474	GeneID:60586,Genbank:XM_006256828.3,RGD:708381	chloride voltage-gated channel 4	GO:1902476,GO:0005524,GO:0005789,GO:0005887,GO:0006821,GO:0015297,GO:0016021,GO:0005247,GO:0031901,GO:0031902,GO:0005254	chloride transmembrane transport|ATP binding|endoplasmic reticulum membrane|integral component of plasma membrane|chloride transport|antiporter activity|integral component of membrane|voltage-gated chloride channel activity|early endosome membrane|late endosome membrane|chloride channel activity
Cldn2	35.38561096	23.19296314	47.57825877	2.051409234	1.036615323	0.023423201	1	Up	0.203898	0.116481	0.192209	0.475535	0.240165	0.325273	GeneID:300920,Genbank:XM_006234262.3,RGD:1560247	claudin 2	GO:0016021,GO:0016338,GO:0042802,GO:0005198,GO:0005886,GO:0005923	integral component of membrane|calcium-independent cell-cell adhesion via plasma membrane cell-adhesion molecules|identical protein binding|structural molecule activity|plasma membrane|bicellular tight junction	rno04514,rno04530,rno04670,rno05160	Cell adhesion molecules (CAMs)|Tight junction|Leukocyte transendothelial migration|Hepatitis C
Clstn3	22.25174998	31.71425933	12.78924063	0.40326468	-1.310201043	0.02455765	1	Down	0.0865635	0.084673	0.142325	0.0585594	0.0680738	0.0638014	GeneID:171393,Genbank:NM_134376.1,RGD:621153	calsyntenin 3	GO:0051932,GO:0035249,GO:0005509,GO:0005789,GO:0051965,GO:0045211,GO:0007156,GO:0007268,GO:0007416,GO:0009986,GO:1902474,GO:0014069,GO:0050806,GO:0000139,GO:0016021,GO:0001558,GO:0032991	synaptic transmission, GABAergic|synaptic transmission, glutamatergic|calcium ion binding|endoplasmic reticulum membrane|positive regulation of synapse assembly|postsynaptic membrane|homophilic cell adhesion via plasma membrane adhesion molecules|chemical synaptic transmission|synapse assembly|cell surface|positive regulation of protein localization to synapse|postsynaptic density|positive regula…
Clybl	48.16627328	65.81255948	30.51998708	0.463741075	-1.108608579	0.006159856	1	Down	0.822007	1.24915	1.19224	0.466199	0.437792	0.545654	GeneID:306198,Genbank:NM_001100685.1,RGD:1304615	citrate lyase beta like	GO:0004474,GO:0047777,GO:0070207,GO:0106064,GO:0000287	malate synthase activity|(3S)-citramalyl-CoA lyase activity|protein homotrimerization|regulation of cobalamin metabolic process|magnesium ion binding
Cma1	45.64738175	65.40511907	25.88964442	0.395835139	-1.337028405	0.001209339	0.371346241	Down	1.59433	1.48944	1.15566	0.390757	0.638483	0.614275	GeneID:25627,Genbank:NM_013092.1,RGD:2365	chymase 1	GO:0045766,GO:0016485,GO:0004252,GO:0050720,GO:0022617,GO:0071333,GO:0030141,GO:0005576,GO:0005615,GO:0005622,GO:0005737,GO:0030901,GO:0006508,GO:0031012,GO:0006518,GO:0034769,GO:0006955,GO:0004175,GO:0042277,GO:0008233,GO:0043231,GO:0008236	positive regulation of angiogenesis|protein processing|serine-type endopeptidase activity|interleukin-1 beta biosynthetic process|extracellular matrix disassembly|cellular response to glucose stimulus|secretory granule|extracellular region|extracellular space|intracellular|cytoplasm|midbrain development|proteolysis|extracellular matrix|peptide metabolic process|basement membrane disassembly|immun…	rno04614	Renin-angiotensin system
Defb5	35.72459758	61.45241605	9.996779102	0.162675119	-2.619934485	5.51E-05	0.036843566	Down	4.44777	3.30902	6.58151	0	0	0	GeneID:641624,Genbank:NM_001037549.1,RGD:1563630	defensin beta 5	GO:0006935,GO:0031640,GO:0031731,GO:0042056,GO:0042742,GO:0050829,GO:0050830,GO:0060326,GO:0005615,GO:0061844,GO:0005622	chemotaxis|killing of cells of other organism|CCR6 chemokine receptor binding|chemoattractant activity|defense response to bacterium|defense response to Gram-negative bacterium|defense response to Gram-positive bacterium|cell chemotaxis|extracellular space|antimicrobial humoral immune response mediated by antimicrobial peptide|intracellular
Ebf2	66.38640295	101.3664108	31.40639509	0.309830395	-1.690449413	2.49E-06	0.00465542	Down	0.389608	0.274899	0.476317	0.0954912	0.117481	0.13771	GeneID:361060,Genbank:NM_001108383.1,RGD:1310805	early B-cell factor 2	GO:0060612,GO:0001709,GO:0003677,GO:0003682,GO:0005634,GO:0006366,GO:0035563,GO:0045893,GO:0045944,GO:0046872,GO:0000978,GO:0046983,GO:0001077,GO:0050873	adipose tissue development|cell fate determination|DNA binding|chromatin binding|nucleus|transcription by RNA polymerase II|positive regulation of chromatin binding|positive regulation of transcription, DNA-templated|positive regulation of transcription by RNA polymerase II|metal ion binding|RNA polymerase II proximal promoter sequence-specific DNA binding|protein dimerization activity|transcript…
Esrrb	95.30837592	127.6613552	62.95539664	0.493143728	-1.019919909	0.000759364	0.258611819	Down	0.491884	0.628321	0.465943	0.252292	0.284057	0.177846	GeneID:299210,Genbank:XM_008764759.2,RGD:1359557	estrogen-related receptor beta	GO:0001158,GO:0001191,GO:0001205,GO:0001701,GO:0001831,GO:0006355,GO:0001834,GO:0001892,GO:0006366,GO:0003700,GO:0008134,GO:0008270,GO:0008283,GO:0045494,GO:0017145,GO:0045725,GO:0019827,GO:0045821,GO:0045892,GO:0000122,GO:2000737,GO:0045893,GO:0000793,GO:0045944,GO:0000980,GO:0000993,GO:0001047,GO:0003705,GO:0003707,GO:0003713,GO:0005496,GO:0005634,GO:0032039,GO:0005737,GO:0035326,GO:0043401,GO:…	enhancer sequence-specific DNA binding|transcriptional repressor activity, RNA polymerase II transcription factor binding|transcriptional activator activity, RNA polymerase II distal enhancer sequence-specific DNA binding|in utero embryonic development|trophectodermal cellular morphogenesis|regulation of transcription, DNA-templated|trophectodermal cell proliferation|embryonic placenta developmen…	rno04550	Signaling pathways regulating pluripotency of stem cells
Fabp4	882.7068512	1342.710883	422.7028196	0.314812984	-1.667433051	5.33E-07	0.001664243	Down	20.1962	29.2646	40.0128	7.01378	8.6606	9.50223	GeneID:79451,Genbank:NM_053365.1,RGD:69309	fatty acid binding protein 4	GO:0071285,GO:0045892,GO:0005504,GO:0050727,GO:0005515,GO:0071356,GO:0050729,GO:0005634,GO:0005811,GO:0005829,GO:0006469,GO:0006631,GO:0050872,GO:0008284,GO:0042493,GO:0050873,GO:0042632,GO:0001816,GO:0051384	cellular response to lithium ion|negative regulation of transcription, DNA-templated|fatty acid binding|regulation of inflammatory response|protein binding|cellular response to tumor necrosis factor|positive regulation of inflammatory response|nucleus|lipid droplet|cytosol|negative regulation of protein kinase activity|fatty acid metabolic process|white fat cell differentiation|positive regulatio…	rno04923,rno03320	Regulation of lipolysis in adipocyte|PPAR signaling pathway
Fam111a	3782.676104	5712.639924	1852.712284	0.324318058	-1.624518742	0.01726345	1	Down	34.13	25.9753	36.9504	1.11516	0.893241	28.1775	GeneID:499322,Genbank:XM_017589579.1,RGD:1560913	family with sequence similarity 111, member A	GO:0005634,GO:0005737,GO:0006260,GO:0045071,GO:0000785,GO:0001650	nucleus|cytoplasm|DNA replication|negative regulation of viral genome replication|chromatin|fibrillar center
Flrt1	47.9357796	85.26182275	10.60973645	0.124437129	-3.006511078	0.020049126	1	Down	0.0294508	0.0594624	0.156438	0.00536673	0.0112174	0.0116944	GeneID:499308,Genbank:XM_017589576.1,RGD:1565152	fibronectin leucine rich transmembrane protein 1	GO:0051965,GO:0005737,GO:1990138,GO:0005887,GO:0005911,GO:0005925,GO:0006469,GO:0008543,GO:0016358,GO:0019221,GO:0031410,GO:0032809,GO:0044306,GO:0004860,GO:0046426,GO:0005104,GO:0048471,GO:0005615	positive regulation of synapse assembly|cytoplasm|neuron projection extension|integral component of plasma membrane|cell-cell junction|focal adhesion|negative regulation of protein kinase activity|fibroblast growth factor receptor signaling pathway|dendrite development|cytokine-mediated signaling pathway|cytoplasmic vesicle|neuronal cell body membrane|neuron projection terminus|protein kinase inh…
Fndc1	236.1663687	318.7952109	153.5375265	0.481618046	-1.054038645	0.03130298	1	Down	1.39135	0.740376	0.750478	0.425578	0.490538	0.429447	GeneID:308099,Genbank:XM_006227871.3,RGD:1310640	fibronectin type III domain containing 1	GO:0005886,GO:0005911,GO:0010666,GO:0016607,GO:0031966,GO:0051223,GO:0071456,GO:0001934,GO:0005576,GO:0005737	plasma membrane|cell-cell junction|positive regulation of cardiac muscle cell apoptotic process|nuclear speck|mitochondrial membrane|regulation of protein transport|cellular response to hypoxia|positive regulation of protein phosphorylation|extracellular region|cytoplasm
Foxg1	2.795186345	5.590372691	0	0	#NAME?	0.024486834	1	Down	0.010675	0.0537031	0.0882182	0	0	0	GeneID:24370,Genbank:NM_012560.2,RGD:2619	forkhead box G1	GO:0045666,GO:0021852,GO:0003674,GO:0045787,GO:0021954,GO:0005575,GO:0045892,GO:0021987,GO:0005634,GO:0048664,GO:0006351,GO:0006357,GO:0007346,GO:0022008,GO:0007420,GO:0048667,GO:0030154,GO:0007568,GO:0051726,GO:0030900,GO:0009653,GO:2000177,GO:0042472,GO:0009953,GO:0000122,GO:0043565,GO:0010468,GO:0000981,GO:0045665,GO:0016199,GO:0002052	positive regulation of neuron differentiation|pyramidal neuron migration|molecular_function|positive regulation of cell cycle|central nervous system neuron development|cellular_component|negative regulation of transcription, DNA-templated|cerebral cortex development|nucleus|neuron fate determination|transcription, DNA-templated|regulation of transcription by RNA polymerase II|regulation of mitoti…	rno04068	FoxO signaling pathway
Gcgr	24.2320993	38.91812554	9.546073062	0.245286044	-2.027462942	0.011260612	1	Down	0.12645	0.163127	0.42777	0.0483959	0.0702129	0.0420053	GeneID:24953,Genbank:XM_006247876.3,RGD:2669	glucagon receptor	GO:0042593,GO:0007189,GO:0004967,GO:0042594,GO:0005768,GO:0009755,GO:0005886,GO:0070873,GO:0005887,GO:0006887,GO:0007166,GO:0007186,GO:0016021,GO:0071377,GO:0017046,GO:0007188	glucose homeostasis|adenylate cyclase-activating G-protein coupled receptor signaling pathway|glucagon receptor activity|response to starvation|endosome|hormone-mediated signaling pathway|plasma membrane|regulation of glycogen metabolic process|integral component of plasma membrane|exocytosis|cell surface receptor signaling pathway|G-protein coupled receptor signaling pathway|integral component o…	rno04080,rno04922	Neuroactive ligand-receptor interaction|Glucagon signaling pathway
Gpd1	3129.818855	4904.799997	1354.837712	0.276226903	-1.856074258	0.010400083	1	Down	15.4138	28.8295	49.5297	7.50667	6.86763	10.2697	GeneID:60666,Genbank:XM_006257376.2,RGD:621381	glycerol-3-phosphate dehydrogenase 1	GO:0046168,GO:0004368,GO:0046486,GO:0005829,GO:0051287,GO:0005975,GO:0006072,GO:0006094,GO:0006116,GO:0071320,GO:0071356,GO:0006127,GO:0006734,GO:0009331,GO:0004367,GO:0042803,GO:0045821	glycerol-3-phosphate catabolic process|glycerol-3-phosphate dehydrogenase activity|glycerolipid metabolic process|cytosol|NAD binding|carbohydrate metabolic process|glycerol-3-phosphate metabolic process|gluconeogenesis|NADH oxidation|cellular response to cAMP|cellular response to tumor necrosis factor|glycerophosphate shuttle|NADH metabolic process|glycerol-3-phosphate dehydrogenase complex|glyc…	rno00564	Glycerophospholipid metabolism
Grifin	31.67514043	52.89405334	10.45622753	0.197682478	-2.338743095	0.000678203	0.248903779	Down	0.679482	1.66237	1.64967	0.0453557	0.0466048	0.294839	GeneID:117130,Genbank:XM_008768938.1,RGD:71055	galectin-related inter-fiber protein	GO:0030246	carbohydrate binding
Grik2	13.93391492	22.90667917	4.961150663	0.216580964	-2.207021648	0.004689598	0.852823825	Down	0.165678	0.164359	0.110381	0.0541948	0.0164087	0.0252654	GeneID:54257,Genbank:NM_019309.2,RGD:2733	glutamate ionotropic receptor kainate type subunit 2	GO:0006874,GO:0006886,GO:0007268,GO:0008066,GO:0008328,GO:0032839,GO:0014069,GO:0032983,GO:0015277,GO:0034220,GO:0035235,GO:0035249,GO:0045202,GO:0042391,GO:0045211,GO:0042734,GO:0046328,GO:0048169,GO:0048172,GO:0001662,GO:0050804,GO:0004970,GO:0050806,GO:0005234,GO:0005515,GO:0005887,GO:0016020,GO:0016021,GO:0019228,GO:0030054,GO:0030165,GO:0030424,GO:0042802,GO:0030425,GO:0031624,GO:0042803,GO:…	cellular calcium ion homeostasis|intracellular protein transport|chemical synaptic transmission|glutamate receptor activity|ionotropic glutamate receptor complex|dendrite cytoplasm|postsynaptic density|kainate selective glutamate receptor complex|kainate selective glutamate receptor activity|ion transmembrane transport|ionotropic glutamate receptor signaling pathway|synaptic transmission, glutama…	rno04080,rno04724	Neuroactive ligand-receptor interaction|Glutamatergic synapse
Gys2	38.16990134	66.96427156	9.375531118	0.140007961	-2.836419233	0.001074468	0.335978512	Down	0.214379	0.469632	0.745392	0.00758423	0.0872216	0.0990868	GeneID:25623,Genbank:NM_013089.2,RGD:2773	glycogen synthase 2	GO:0030864,GO:0004373,GO:0043265,GO:0005536,GO:0005737,GO:0005829,GO:0005856,GO:0005938,GO:0005977,GO:0005978,GO:0009749	cortical actin cytoskeleton|glycogen (starch) synthase activity|ectoplasm|glucose binding|cytoplasm|cytosol|cytoskeleton|cell cortex|glycogen metabolic process|glycogen biosynthetic process|response to glucose	rno00500,rno04151,rno04152,rno04910,rno04922,rno04931	Starch and sucrose metabolism|PI3K-Akt signaling pathway|AMPK signaling pathway|Insulin signaling pathway|Glucagon signaling pathway|Insulin resistance
Hapln4	6.946814958	12.83875262	1.054877296	0.082163535	-3.605357942	0.022420763	1	Down	0.00758971	0.126735	0.160583	0	0.0145993	0.00768431	GeneID:361129,Genbank:NM_001108398.1,RGD:1308408	hyaluronan and proteoglycan link protein 4	GO:0005578,GO:0007155,GO:0007417,GO:0001501,GO:0005201,GO:0005540	proteinaceous extracellular matrix|cell adhesion|central nervous system development|skeletal system development|extracellular matrix structural constituent|hyaluronic acid binding
Hrh3	17.9113625	30.0320282	5.790696791	0.192817373	-2.374693048	0.001076222	0.335978512	Down	0.0636819	0.146362	0.20019	0.0266144	0.034258	0.0290269	GeneID:85268,Genbank:NM_001270568.1,RGD:620630	histamine receptor H3	GO:0050679,GO:0014063,GO:0005886,GO:0050890,GO:0007186,GO:0014070,GO:0007194,GO:0007204,GO:0007420,GO:0007612,GO:0007613,GO:0016021,GO:0008144,GO:0042755,GO:0014050,GO:0042756,GO:0043005,GO:0014053,GO:0001505,GO:0043209,GO:0014061,GO:0004969,GO:0045776	positive regulation of epithelial cell proliferation|negative regulation of serotonin secretion|plasma membrane|cognition|G-protein coupled receptor signaling pathway|response to organic cyclic compound|negative regulation of adenylate cyclase activity|positive regulation of cytosolic calcium ion concentration|brain development|learning|memory|integral component of membrane|drug binding|eating be…	rno04080	Neuroactive ligand-receptor interaction
Iqcf1	8.480166855	3.008709992	13.95162372	4.637078268	2.213216078	0.028563522	1	Up	0.0424326	0.0422021	0	0.0929378	0.196373	0.100892	GeneID:503227,Genbank:XM_006243838.3,RGD:1565640	IQ motif containing F1	GO:0005516,GO:0060474,GO:2000344,GO:0001669	calmodulin binding|positive regulation of flagellated sperm motility involved in capacitation|positive regulation of acrosome reaction|acrosomal vesicle
Kcna5	50.6328072	68.02494433	33.24067007	0.488654131	-1.033114406	0.008241776	1	Down	0.944529	0.836348	0.699363	0.255304	0.510722	0.395857	GeneID:25470,Genbank:NM_012972.1,RGD:2953	potassium voltage-gated channel subfamily A member 5	GO:0005783,GO:0005794,GO:0005886,GO:0005887,GO:0016020,GO:0006813,GO:0016021,GO:0019229,GO:0007219,GO:0019870,GO:0019901,GO:0030018,GO:0034705,GO:0051481,GO:0055075,GO:0055093,GO:0042391,GO:0060081,GO:0060372,GO:0071435,GO:0001666,GO:1900087,GO:0071805,GO:0005102,GO:2000288,GO:0005249,GO:0005251,GO:0005515,GO:0008076,GO:0009612,GO:0010033,GO:0014704,GO:0015271,GO:0042542,GO:0043266,GO:0043267,GO:…	endoplasmic reticulum|Golgi apparatus|plasma membrane|integral component of plasma membrane|membrane|potassium ion transport|integral component of membrane|regulation of vasoconstriction|Notch signaling pathway|potassium channel inhibitor activity|protein kinase binding|Z disc|potassium channel complex|negative regulation of cytosolic calcium ion concentration|potassium ion homeostasis|response t…
Kcnj16	8.446841308	13.95906638	2.934616237	0.210230123	-2.249958695	0.028571611	1	Down	0.0680038	0.088473	0.0338444	0.022065	0.00468833	0.0144784	GeneID:29719,Genbank:XM_006247568.2,RGD:61824	potassium voltage-gated channel subfamily J member 16	GO:0005886,GO:0005887,GO:0010107,GO:0016021,GO:0016323,GO:0034765,GO:0071804,GO:0071805,GO:0005242,GO:0005515	plasma membrane|integral component of plasma membrane|potassium ion import|integral component of membrane|basolateral plasma membrane|regulation of ion transmembrane transport|cellular potassium ion transport|potassium ion transmembrane transport|inward rectifier potassium channel activity|protein binding	rno04971	Gastric acid secretion
Klb	23.38789387	41.67455502	5.101232711	0.122406411	-3.030248974	1.48E-06	0.003115737	Down	0.177306	0.217566	0.275208	0.0153674	0.0163509	0.0501921	GeneID:289625,Genbank:XM_017599543.1,RGD:1308227	klotho beta	GO:0008284,GO:0008543,GO:0017042,GO:0017134,GO:0046477,GO:0090080,GO:0004565,GO:0005104,GO:0005829	positive regulation of cell proliferation|fibroblast growth factor receptor signaling pathway|glycosylceramidase activity|fibroblast growth factor binding|glycosylceramide catabolic process|positive regulation of MAPKKK cascade by fibroblast growth factor receptor signaling pathway|beta-galactosidase activity|fibroblast growth factor receptor binding|cytosol	rno04714	Thermogenesis
Krt13	9.448982331	15.2542395	3.643725164	0.238866393	-2.065724206	0.029416563	1	Down	0.160658	0.189061	0.0873837	0.0828118	0.0505138	0.0178787	GeneID:287699,Genbank:NM_001004021.1,RGD:1302937	keratin 13	GO:0007010,GO:0009314,GO:0043587,GO:0045095,GO:0045111,GO:0070062,GO:0071300,GO:0003674,GO:0005198,GO:0005575	cytoskeleton organization|response to radiation|tongue morphogenesis|keratin filament|intermediate filament cytoskeleton|extracellular exosome|cellular response to retinoic acid|molecular_function|structural molecule activity|cellular_component	rno04915	Estrogen signaling pathway
Krt14	101.1916039	142.7356761	59.64753172	0.417888038	-1.258811631	0.029066843	1	Down	1.85543	0.788445	1.33419	0.664644	0.367819	0.497107	GeneID:287701,Genbank:XM_017597135.1,RGD:1307463	keratin 14	GO:0045095,GO:0005634,GO:0045110,GO:0005737,GO:0005882,GO:0007568,GO:0045178,GO:0010043,GO:0071944,GO:0010212,GO:1990254,GO:0030855,GO:0003674,GO:0042633,GO:0005198,GO:0005622	keratin filament|nucleus|intermediate filament bundle assembly|cytoplasm|intermediate filament|aging|basal part of cell|response to zinc ion|cell periphery|response to ionizing radiation|keratin filament binding|epithelial cell differentiation|molecular_function|hair cycle|structural molecule activity|intracellular	rno04915	Estrogen signaling pathway
Krt5	47.10884773	68.45258986	25.76510561	0.376393438	-1.40968662	0.014355543	1	Down	0.902731	0.470324	1.20375	0.166076	0.477953	0.306842	GeneID:369017,Genbank:NM_183333.1,RGD:727894	keratin 5	GO:0005737,GO:0005882,GO:0008150,GO:0045095,GO:0097110,GO:0003674,GO:0005198	cytoplasm|intermediate filament|biological_process|keratin filament|scaffold protein binding|molecular_function|structural molecule activity
LOC100125362	24.89308705	34.57452592	15.21164817	0.439966934	-1.184532993	0.036050742	1	Down	0.219875	0.152584	0.110441	0.0866723	0.0464244	0.0708258	GeneID:100125362,Genbank:XM_017595396.1,RGD:1642426	hypothetical protein LOC100125362	GO:0016021	integral component of membrane
LOC100364500	177.4863336	93.81863151	261.1540357	2.783605255	1.476954636	0.007920737	1	Up	1.11164	0.808195	2.1599	2.63725	3.35257	5.18055	GeneID:100364500,Genbank:XM_006255892.3,RGD:2320860	RT1 class I, locus CE11-like	GO:0042612,GO:0002474,GO:0006955,GO:0016021	MHC class I protein complex|antigen processing and presentation of peptide antigen via MHC class I|immune response|integral component of membrane
LOC100365773	12.06937734	19.14917308	4.989581604	0.260563816	-1.940291343	0.018418481	1	Down	0.0497874	0.205148	0.18108	0.0275283	0.0290652	0.0497334	GeneID:100365773,Genbank:NM_001271493.1,RGD:2318412	pink-eyed dilution-like	GO:0005789,GO:0007286,GO:0008150,GO:0008283,GO:0010008,GO:0016021,GO:0030318,GO:0033162,GO:0042438,GO:0043473,GO:0048066,GO:0003674,GO:0055085,GO:0005575,GO:0005765	endoplasmic reticulum membrane|spermatid development|biological_process|cell proliferation|endosome membrane|integral component of membrane|melanocyte differentiation|melanosome membrane|melanin biosynthetic process|pigmentation|developmental pigmentation|molecular_function|transmembrane transport|cellular_component|lysosomal membrane
LOC100910418	44.25704227	29.07021018	59.44387435	2.044838135	1.031986647	0.01606041	1	Up	0.336369	0.641655	0.476135	1.28487	0.884059	1.11638	GeneID:100910418,Genbank:XM_003751623.4,RGD:6498623	tissue-type plasminogen activator-like	GO:0004252,GO:0005576,GO:0031639	serine-type endopeptidase activity|extracellular region|plasminogen activation
LOC100910575	103.6093052	198.3620014	8.856608982	0.044648718	-4.485237451	0.01706837	1	Down	6.08092	0.245763	3.06445	0.0767515	0.065448	0.167023	GeneID:100910575,Genbank:XM_003749864.4,RGD:6498120	serine-threonine kinase receptor-associated protein-like
LOC100910771	114.1410636	53.91240445	174.3697228	3.234315454	1.693460397	0.041913052	1	Up	0.454043	0.0603159	0.13194	0.523397	0.663982	1.67979	GeneID:100910771,Genbank:XM_003750753.4,RGD:6496502	mitogen-activated protein kinase kinase kinase 7-like	GO:0005886,GO:0006351,GO:0006355,GO:0007252,GO:0043507,GO:0000287,GO:0004709,GO:0005622	plasma membrane|transcription, DNA-templated|regulation of transcription, DNA-templated|I-kappaB phosphorylation|positive regulation of JUN kinase activity|magnesium ion binding|MAP kinase kinase kinase activity|intracellular
LOC100911034	51.97569206	85.73685991	18.21452421	0.212446831	-2.23482627	2.75E-05	0.024486832	Down	0.990444	0.602425	1.29391	0.163265	0.206464	0.164584	GeneID:100911034,Genbank:XM_003749609.2,RGD:6495283	cysteine desulfurase, mitochondrial-like
LOC100911825	25.30918516	14.25965436	36.35871595	2.549761378	1.350362237	0.013830255	1	Up	0.492438	0.625437	0.597277	0.76268	0.525461	0.815789	GeneID:100911825,Genbank:XM_008769777.2,RGD:6490558	low affinity immunoglobulin gamma Fc region receptor III-like	GO:0016021,GO:0038094	integral component of membrane|Fc-gamma receptor signaling pathway
LOC102549747	12.84910458	5.603946013	20.09426315	3.585734606	1.842268713	0.020160573	1	Up	0.0119061	0.0120568	0.0248547	0.022936	0.0359097	0	GeneID:102549747,Genbank:XM_006252084.3,RGD:7637649	MLV-related proviral Env polyprotein-like
LOC102551453	20.52216	29.47171252	11.57260749	0.392668308	-1.348616931	0.025154221	1	Down	0.646515	0.386682	0.692796	0.147669	0.247358	0.257007	GeneID:102551453,Genbank:XM_008765863.2,RGD:7499194	keratin, type II cytoskeletal 5-like	GO:0005886,GO:0045095	plasma membrane|keratin filament
LOC102553014	9.529158458	4.286516035	14.77180088	3.446108859	1.784968275	0.049909212	1	Up	0.12969	0.144888	0.157922	0.0818573	0.138168	0.104422	GeneID:102553014,Genbank:XM_017591244.1,RGD:7547553	uncharacterized LOC102553014
LOC102554479	6.164012504	10.61882801	1.709196998	0.1609591	-2.635233953	0.031427156	1	Down	0.0415693	0.0420543	0.0220367	0	0	0	GeneID:102554479,Genbank:XM_017592310.1,RGD:7587488	zinc finger protein 120-like
LOC102555474	16.06875126	30.40866067	1.728841845	0.0568536	-4.136604473	0.038631732	1	Down	0.0105235	0.15796	0.0632387	0	0	0.0139482	GeneID:102555474,Genbank:XM_008760021.2,RGD:7603068	uncharacterized LOC102555474
LOC103689934	7.139322065	13.66154146	0.617102667	0.045170793	-4.468465936	0.001867389	0.492648702	Down	0.570652	0.303594	0.139879	0.0265303	0	0	GeneID:103689934,Genbank:XM_003750994.4,RGD:9437153	leucine-rich repeat-containing protein 45-like
LOC103689945	98.35157633	132.9961593	63.70699337	0.479013783	-1.061860927	0.027935055	1	Down	0.760612	0.760725	0.681294	0.378041	0.30098	0.709	GeneID:103689945,Genbank:XM_008770640.2,RGD:9188719	zinc finger SWIM domain-containing protein 8-like	GO:0008270	zinc ion binding
LOC103689994	9.661324425	16.24123713	3.081411721	0.189727648	-2.397998164	0.026812067	1	Down	0.0597672	0.176869	0.0700568	0.0129731	0.0339944	0.021242	GeneID:103689994,Genbank:XM_003751965.4,RGD:9339057	radial spoke head protein 4 homolog A
LOC103689995	16.26719399	5.953206811	26.58118116	4.465018939	2.158666295	0.002776099	0.634135444	Up	0.0699464	0.0938297	0.0776038	0.17152	0.174493	0.181517	GeneID:103689995,Genbank:XM_008765895.1,RGD:9147056	cytoplasmic dynein 2 heavy chain 1-like
LOC103690014	6.033770773	0.327003938	11.74053761	35.90335233	5.166046651	0.013491936	1	Up	0	0	0.00891878	0.146558	0	0.142702	GeneID:103690014,Genbank:XM_017595312.1,RGD:9270228	rac GTPase-activating protein 1-like
LOC108348069	9.690033865	19.38006773	0	0	#NAME?	0.044225574	1	Down	0.0497676	0.0176213	0.210495	0.0165804	0.0598149	0.0288121	GeneID:108348069,Genbank:XM_008771752.1	HEAT repeat-containing protein 1	GO:0030515,GO:0030686,GO:0032040,GO:0034455,GO:0045943,GO:0000462,GO:0001650,GO:0005739	snoRNA binding|90S preribosome|small-subunit processome|t-UTP complex|positive regulation of transcription by RNA polymerase I|maturation of SSU-rRNA from tricistronic rRNA transcript (SSU-rRNA, 5.8S rRNA, LSU-rRNA)|fibrillar center|mitochondrion
LOC108348083	12.80467611	24.95503252	0.654319702	0.02621995	-5.253191261	0.008702051	1	Down	0.116755	0.22941	0.0130991	0	0	0.00659778	GeneID:108348083,Genbank:XM_003749108.3	delta-1-pyrroline-5-carboxylate synthase	GO:0016310,GO:0055114,GO:0055129,GO:0004350,GO:0005524,GO:0005739	phosphorylation|oxidation-reduction process|L-proline biosynthetic process|glutamate-5-semialdehyde dehydrogenase activity|ATP binding|mitochondrion
LOC108348102	14.77238578	7.618801555	21.92597001	2.877876507	1.525004686	0.037025758	1	Up	0.0628321	0.060351	0.0498583	0.113934	0.0842644	0.1019	GeneID:108348102,Genbank:XM_006228754.3	zinc finger protein 30 homolog
LOC108348114	17.757449	29.71334245	5.801555544	0.195250856	-2.356599223	0.000593372	0.231550963	Down	0.0810059	0.0920363	0.182884	0.0274192	0.0114284	0.0178373	GeneID:108348114,Genbank:XM_006238585.3	tetratricopeptide repeat protein 39A
LOC108348142	977.7533833	131.689565	1823.817202	13.84936765	3.7917482	0.004043934	0.814483073	Up	2.12378	3.32174	6.08319	105.138	37.4708	24.0211	GeneID:108348142,Genbank:XM_017595386.1	60S ribosomal protein L8	GO:0002181,GO:0003735	cytoplasmic translation|structural constituent of ribosome
LOC108352515	9.459812952	16.53853702	2.381088889	0.143972159	-2.796138236	0.004325483	0.822303763	Down	0.159691	0.0857507	0.266193	0.0201018	0.0323713	0.0108899	GeneID:108352515,Genbank:XM_017598959.1	endogenous retrovirus group K member 8 Pol protein-like
LOC690319	53.18677103	31.22793639	75.14560567	2.406358356	1.266851505	0.046046064	1	Up	0.168918	0.0564981	0.121555	0.275414	0.151718	0.406416	GeneID:690319,Genbank:XM_001074075.5,RGD:1597369	similar to Alpha-1-antitrypsin-related protein precursor
LOC690326	3.813761815	7.272969167	0.354554463	0.048749617	-4.358465297	0.02192382	1	Down	0.0789198	0.0518655	0.132626	0	0.0258	0	GeneID:690326,Genbank:XM_006237459.1,RGD:1597362	hypothetical protein LOC690326	GO:0004252	serine-type endopeptidase activity
LOC691485	117.2089704	185.5154994	48.90244141	0.263602996	-1.923561329	1.32E-08	4.94E-05	Down	0.905903	1.19189	1.49215	0.324178	0.194961	0.321443	GeneID:691485,Genbank:XM_006240652.3,RGD:1583888	hypothetical protein LOC691485	GO:0005886,GO:0016021	plasma membrane|integral component of membrane
LOC691813	16.65997897	29.53615072	3.783807212	0.128107662	-2.964571331	6.02E-05	0.03888928	Down	0.148018	0.222639	0.0829815	0.005806	0.00621513	0.050213	GeneID:691813,Genbank:XM_006228335.3,RGD:1594655	similar to phospholipase A2, group IVC (cytosolic, calcium-independent)
Larp6	21.345559	30.21511318	12.47600482	0.412906109	-1.276114331	0.037601719	1	Down	0.335266	0.322728	0.210473	0.168091	0.0480432	0.143116	GeneID:315731,Genbank:NM_001108154.1,RGD:1308414	La ribonucleoprotein domain family, member 6	GO:0017022,GO:0032967,GO:0035613,GO:0045727,GO:0048027,GO:1902416,GO:1990825,GO:0005634,GO:0005844,GO:0006396	myosin binding|positive regulation of collagen biosynthetic process|RNA stem-loop binding|positive regulation of translation|mRNA 5'-UTR binding|positive regulation of mRNA binding|sequence-specific mRNA binding|nucleus|polysome|RNA processing
Lep	58.14915045	85.80728393	30.49101697	0.355342992	-1.492715849	9.53E-05	0.054279985	Down	0.433579	0.405727	0.467709	0.176684	0.075878	0.18163	GeneID:25608,Genbank:NM_013076.3,RGD:3000	leptin	GO:0045639,GO:0045765,GO:0045906,GO:0046325,GO:0046427,GO:0050999,GO:0051428,GO:0051726,GO:0051897,GO:0098868,GO:0060587,GO:1900015,GO:0060612,GO:1900180,GO:1900745,GO:1904651,GO:1990051,GO:0002021,GO:0003300,GO:0005102,GO:0005125,GO:0005179,GO:0006909,GO:0005615,GO:0007259,GO:0007260,GO:0007565,GO:0007584,GO:0010888,GO:0007623,GO:0014068,GO:0008083,GO:0008203,GO:0014823,GO:0019222,GO:0019933,GO:…	positive regulation of myeloid cell differentiation|regulation of angiogenesis|negative regulation of vasoconstriction|negative regulation of glucose import|positive regulation of JAK-STAT cascade|regulation of nitric-oxide synthase activity|peptide hormone receptor binding|regulation of cell cycle|positive regulation of protein kinase B signaling|bone growth|regulation of lipoprotein lipid oxida…	rno04630,rno04152,rno04080,rno04060,rno04920,rno04932	Jak-STAT signaling pathway|AMPK signaling pathway|Neuroactive ligand-receptor interaction|Cytokine-cytokine receptor interaction|Adipocytokine signaling pathway|Non-alcoholic fatty liver disease (NAFLD)
Lgals5	578.6960247	383.7058155	773.686234	2.01635264	1.011747974	1.46E-05	0.0171368	Up	8.57315	9.78892	11.6019	19.1093	22.1698	15.1537	GeneID:25475,Genbank:NM_012976.2,RGD:3004	lectin, galactose binding, soluble 5	GO:0030246	carbohydrate binding
Lpar4	59.44170175	81.8492332	37.03417029	0.45246814	-1.144111885	0.002668764	0.617143532	Down	0.522744	0.574391	0.583943	0.354855	0.125765	0.241536	GeneID:302378,Genbank:NM_001106940.1,RGD:1563686	lysophosphatidic acid receptor 4	GO:0007186,GO:0016604,GO:0035025,GO:0035727,GO:0043231,GO:0051482,GO:0070915,GO:0004930,GO:0005886,GO:0005887	G-protein coupled receptor signaling pathway|nuclear body|positive regulation of Rho protein signal transduction|lysophosphatidic acid binding|intracellular membrane-bounded organelle|positive regulation of cytosolic calcium ion concentration involved in phospholipase C-activating G-protein coupled signaling pathway|lysophosphatidic acid receptor activity|G-protein coupled receptor activity|plasm…	rno04015,rno04072,rno04151,rno04080,rno05200	Rap1 signaling pathway|Phospholipase D signaling pathway|PI3K-Akt signaling pathway|Neuroactive ligand-receptor interaction|Pathways in cancer
MGC109340	13.70547094	24.13055727	3.280384606	0.135943177	-2.878924356	0.000468543	0.20409971	Down	0.40071	0.324818	0.694421	0.0891047	0.0191096	0.077201	GeneID:317409,Genbank:NM_001024267.2,RGD:1563536	similar to Microsomal signal peptidase 23 kDa subunit (SPase 22 kDa subunit) (SPC22/23)	GO:0016021,GO:0031090,GO:0045047,GO:0005787,GO:0006465,GO:0008233	integral component of membrane|organelle membrane|protein targeting to ER|signal peptidase complex|signal peptide processing|peptidase activity	rno03060	Protein export
Mcpt1l1	119.7118435	181.6722569	57.75143004	0.317887998	-1.653409547	2.24E-05	0.021058989	Down	4.88954	3.3935	3.0586	0.633254	1.26867	1.4885	GeneID:100360872,Genbank:NM_001277668.1,RGD:2321286	mast cell protease 1-like 1	GO:0030141,GO:0004252,GO:0005576,GO:0006508	secretory granule|serine-type endopeptidase activity|extracellular region|proteolysis	rno04614	Renin-angiotensin system
Mlc1	717.2882045	1011.851089	422.7253204	0.417774241	-1.259204554	0.014541096	1	Down	4.51106	10.3878	9.64637	1.66599	3.35711	4.68937	GeneID:315215,Genbank:NM_001108105.1,RGD:1308552	megalencephalic leukoencephalopathy with subcortical cysts 1	GO:0051259,GO:0032388,GO:0016021,GO:0005764,GO:0055037,GO:0034220,GO:0016192,GO:0005768,GO:0071397,GO:0044877,GO:0016323,GO:0072584,GO:0005769,GO:0005783,GO:0005886,GO:0045121,GO:0016324,GO:0005901,GO:0047484,GO:0030136,GO:0005911,GO:0048471,GO:0031410,GO:0008565,GO:0005216,GO:0015031,GO:0005737	protein complex oligomerization|positive regulation of intracellular transport|integral component of membrane|lysosome|recycling endosome|ion transmembrane transport|vesicle-mediated transport|endosome|cellular response to cholesterol|protein-containing complex binding|basolateral plasma membrane|caveolin-mediated endocytosis|early endosome|endoplasmic reticulum|plasma membrane|membrane raft|apic…
Mpo	24.25727273	41.48964333	7.024902124	0.169317004	-2.562201225	0.03908558	1	Down	0.134549	0.193132	0.645954	0.0667784	0.034504	0.0454006	GeneID:303413,Genbank:NM_001107036.1,RGD:1592081	myeloperoxidase	GO:0044130,GO:0020037,GO:0004601,GO:0050830,GO:0030141,GO:0050832,GO:0032094,GO:0055114,GO:0005615,GO:0005634,GO:0032496,GO:0005737,GO:1990268,GO:0034374,GO:0006979,GO:0042582,GO:0007568,GO:0042742,GO:0008201,GO:0001878,GO:0042744,GO:0009612,GO:0002149,GO:0043231,GO:0019430,GO:0002679	negative regulation of growth of symbiont in host|heme binding|peroxidase activity|defense response to Gram-positive bacterium|secretory granule|defense response to fungus|response to food|oxidation-reduction process|extracellular space|nucleus|response to lipopolysaccharide|cytoplasm|response to gold nanoparticle|low-density lipoprotein particle remodeling|response to oxidative stress|azurophil …	rno00983,rno04145,rno05202,rno05221	Drug metabolism - other enzymes|Phagosome|Transcriptional misregulation in cancers|Acute myeloid leukemia
Mpz	152.5133995	261.3671184	43.65968056	0.167043509	-2.581704172	0.003364124	0.716061435	Down	5.70855	1.84913	2.95006	0.435743	0.556967	0.623992	GeneID:24564,Genbank:NM_017027.2,RGD:3109	myelin protein zero	GO:0005886,GO:0005887,GO:0016323,GO:0042552,GO:0043066,GO:0043209,GO:0045217,GO:0098742,GO:0003674,GO:0098743,GO:0005764,GO:0005791	plasma membrane|integral component of plasma membrane|basolateral plasma membrane|myelination|negative regulation of apoptotic process|myelin sheath|cell-cell junction maintenance|cell-cell adhesion via plasma-membrane adhesion molecules|molecular_function|cell aggregation|lysosome|rough endoplasmic reticulum	rno04514	Cell adhesion molecules (CAMs)
Mreg	66.40217303	90.02287028	42.78147578	0.475228968	-1.073305314	0.00265848	0.617143532	Down	0.656637	0.643756	0.937118	0.411824	0.261534	0.315327	GeneID:501162,Genbank:XM_017596606.1,RGD:1562333	melanoregulin	GO:0042470,GO:0043473,GO:0048066,GO:0030318,GO:0032402,GO:0032991	melanosome|pigmentation|developmental pigmentation|melanocyte differentiation|melanosome transport|protein-containing complex
Ms4a18	46.46209057	30.50212784	62.42205331	2.046481926	1.033145925	0.043683525	1	Up	0.253721	0.228553	0.197457	0.406897	0.650403	0.347778	GeneID:100359485,Genbank:XM_017590480.1,RGD:2323808	membrane spanning 4-domains A18	GO:0016021	integral component of membrane
Muc16	1548.562436	2067.407359	1029.717512	0.498071901	-1.005574073	0.016468361	1	Down	1.661	0.955889	0.990966	0.575502	0.615327	0.526466	GeneID:315451,Genbank:XM_017596178.1,RGD:1308422	mucin 16, cell surface associated	GO:0009897,GO:0019898,GO:0045409,GO:0050680,GO:0061045,GO:0003674,GO:0005615,GO:0008150	external side of plasma membrane|extrinsic component of membrane|negative regulation of interleukin-6 biosynthetic process|negative regulation of epithelial cell proliferation|negative regulation of wound healing|molecular_function|extracellular space|biological_process
Myl3	10.85964529	17.80423111	3.915059461	0.219894891	-2.185114009	0.019585089	1	Down	0.108054	0.158905	0.598379	0.177848	0.0520062	0	GeneID:24585,Genbank:XM_006243917.3,RGD:3142	myosin light chain 3	GO:0005509,GO:0006936,GO:0006942,GO:0007519,GO:0016459,GO:0031672,GO:0031674,GO:0055010,GO:0060048,GO:0002026,GO:0003774,GO:0003785	calcium ion binding|muscle contraction|regulation of striated muscle contraction|skeletal muscle tissue development|myosin complex|A band|I band|ventricular cardiac muscle tissue morphogenesis|cardiac muscle contraction|regulation of the force of heart contraction|motor activity|actin monomer binding	rno04371,rno04260,rno04261,rno05410,rno05414	Apelin signaling pathway|Cardiac muscle contraction|Adrenergic signaling in cardiomyocytes|Hypertrophic cardiomyopathy (HCM)|Dilated cardiomyopathy (DCM)
Nkx2-8	25.76358187	41.44928084	10.0778829	0.243137702	-2.040154472	0.045759243	1	Down	0.702364	2.27534	0.750804	0.320567	0.360287	0.232258	GeneID:299061,Genbank:NM_001106732.1,RGD:1310629	NK2 homeobox 8	GO:0003700,GO:0005634,GO:0006351,GO:0006366,GO:0007409,GO:0008150,GO:0030323,GO:0030324,GO:0043565,GO:0045944,GO:0000978,GO:0050680,GO:0001077,GO:0003690	DNA binding transcription factor activity|nucleus|transcription, DNA-templated|transcription by RNA polymerase II|axonogenesis|biological_process|respiratory tube development|lung development|sequence-specific DNA binding|positive regulation of transcription by RNA polymerase II|RNA polymerase II proximal promoter sequence-specific DNA binding|negative regulation of epithelial cell proliferation|…
Nppa	449.0123579	839.3901162	58.63459965	0.069853812	-3.839517336	0.009347289	1	Down	2.86656	42.2392	54.7285	2.06378	1.63791	2.67612	GeneID:24602,Genbank:NM_012612.2,RGD:3193	natriuretic peptide A	GO:0005737,GO:0006182,GO:0006457,GO:0007168,GO:0032868,GO:0032991,GO:0007218,GO:0007507,GO:0042629,GO:0048471,GO:0050878,GO:0050880,GO:1903766,GO:0050891,GO:0051427,GO:1903815,GO:0051428,GO:0001666,GO:0003085,GO:0005102,GO:0005179,GO:0005184,GO:0005615,GO:0005634,GO:0007565,GO:0008217,GO:0010460,GO:0010469,GO:0060372,GO:0014898,GO:0060452,GO:0030308,GO:0061049,GO:0031012,GO:0071260,GO:0071855,GO:…	cytoplasm|cGMP biosynthetic process|protein folding|receptor guanylyl cyclase signaling pathway|response to insulin|protein-containing complex|neuropeptide signaling pathway|heart development|mast cell granule|perinuclear region of cytoplasm|regulation of body fluid levels|regulation of blood vessel size|positive regulation of potassium ion export across plasma membrane|multicellular organismal w…	rno04066,rno04270	HIF-1 signaling pathway|Vascular smooth muscle contraction
Otop1	18.22079648	32.00346605	4.438126915	0.138676445	-2.850205332	0.00094745	0.305977408	Down	0.221844	0.529039	0.797049	0.0314327	0.0324769	0.136719	GeneID:305427,Genbank:NM_181433.1,RGD:631389	otopetrin 1	GO:0016021,GO:0031214,GO:0042472,GO:0005615,GO:0009590,GO:0016020	integral component of membrane|biomineral tissue development|inner ear morphogenesis|extracellular space|detection of gravity|membrane
Pax7	9.212526009	3.981403612	14.44364841	3.627777993	1.859086171	0.04904728	1	Up	0.0174066	0.021624	0.0133243	0.0493285	0.0426417	0.067263	GeneID:500574,Genbank:XM_006239263.3,RGD:1564360	paired box 7	GO:0048706,GO:0006351,GO:0051216,GO:0007519,GO:0060415,GO:0010453,GO:0010468,GO:0014813,GO:0021527,GO:0021904,GO:2000288,GO:0031062,GO:0043393,GO:0043403,GO:0043565,GO:0000983,GO:0045944,GO:0005634,GO:0048663,GO:0006338	embryonic skeletal system development|transcription, DNA-templated|cartilage development|skeletal muscle tissue development|muscle tissue morphogenesis|regulation of cell fate commitment|regulation of gene expression|skeletal muscle satellite cell commitment|spinal cord association neuron differentiation|dorsal/ventral neural tube patterning|positive regulation of myoblast proliferation|positive …	rno05202	Transcriptional misregulation in cancers
Pax9	63.27471649	86.33400923	40.21542374	0.465812072	-1.102180065	0.00218728	0.553647795	Down	0.721591	0.489984	0.471884	0.231084	0.378332	0.180524	GeneID:362741,Genbank:NM_001039539.1,RGD:1560838	paired box 9	GO:0045892,GO:0001228,GO:0045944,GO:0003674,GO:0005575,GO:0005634,GO:0006366,GO:0007492,GO:0060325,GO:0008150,GO:0042476,GO:0071363,GO:0042481,GO:0000977	negative regulation of transcription, DNA-templated|transcriptional activator activity, RNA polymerase II transcription regulatory region sequence-specific DNA binding|positive regulation of transcription by RNA polymerase II|molecular_function|cellular_component|nucleus|transcription by RNA polymerase II|endoderm development|face morphogenesis|biological_process|odontogenesis|cellular response t…
Pck1	270.4966205	373.1883889	167.804852	0.449651857	-1.153119668	0.013527984	1	Down	2.09027	3.7663	3.35794	0.480782	1.30401	2.33746	GeneID:362282,Genbank:NM_198780.3,RGD:3267	phosphoenolpyruvate carboxykinase 1	GO:0005525,GO:0005737,GO:0005739,GO:0005829,GO:0006807,GO:0006006,GO:0007568,GO:0014823,GO:0006090,GO:0019003,GO:0019543,GO:0030145,GO:0046327,GO:0031406,GO:0051365,GO:0061402,GO:0070365,GO:0070741,GO:0071300,GO:0000287,GO:0071320,GO:0071332,GO:0004550,GO:0071333,GO:0004611,GO:0004613,GO:0006094,GO:0006107,GO:0006165,GO:0032496,GO:0006475,GO:0032868,GO:0006629,GO:0032869,GO:0033993,GO:0071347,GO:…	GTP binding|cytoplasm|mitochondrion|cytosol|nitrogen compound metabolic process|glucose metabolic process|aging|response to activity|pyruvate metabolic process|GDP binding|propionate catabolic process|manganese ion binding|glycerol biosynthetic process from pyruvate|carboxylic acid binding|cellular response to potassium ion starvation|positive regulation of transcription from RNA polymerase II pr…	rno00010,rno00020,rno00620,rno04068,rno04151,rno04152,rno04910,rno04922,rno04920,rno03320,rno04964,rno04931	Glycolysis / Gluconeogenesis|Citrate cycle (TCA cycle)|Pyruvate metabolism|FoxO signaling pathway|PI3K-Akt signaling pathway|AMPK signaling pathway|Insulin signaling pathway|Glucagon signaling pathway|Adipocytokine signaling pathway|PPAR signaling pathway|Proximal tubule bicarbonate reclamation|Insulin resistance
Pdcd5	25.74977677	6.637424397	44.86212914	6.7589665	2.756802664	0.048543065	1	Up	0.0245396	0.024316	0.0123664	0.974094	0.346922	0.0506817	GeneID:292814,Genbank:NM_001106247.1,RGD:1310561	programmed cell death 5	GO:0005829,GO:0008201,GO:0008285,GO:0010628,GO:0010698,GO:0012501,GO:0043065,GO:0043280,GO:0048487,GO:0071560,GO:0090200,GO:0003677,GO:1903638,GO:0005634,GO:1903645	cytosol|heparin binding|negative regulation of cell proliferation|positive regulation of gene expression|acetyltransferase activator activity|programmed cell death|positive regulation of apoptotic process|positive regulation of cysteine-type endopeptidase activity involved in apoptotic process|beta-tubulin binding|cellular response to transforming growth factor beta stimulus|positive regulation o…
Phgdh	112.7090527	156.5852293	68.83287605	0.439587286	-1.185778433	3.92E-05	0.028977047	Down	2.13731	1.81533	1.47564	0.943229	0.642119	0.748795	GeneID:58835,Genbank:XM_006233010.1,RGD:61987	phosphoglycerate dehydrogenase	GO:0031175,GO:0006541,GO:0043209,GO:0006544,GO:0051287,GO:0006563,GO:0006564,GO:0006566,GO:0009070,GO:0009448,GO:0055114,GO:0010468,GO:0070314,GO:0019530,GO:0021510,GO:0021782,GO:0004617,GO:0021915,GO:0022008,GO:0005575	neuron projection development|glutamine metabolic process|myelin sheath|glycine metabolic process|NAD binding|L-serine metabolic process|L-serine biosynthetic process|threonine metabolic process|serine family amino acid biosynthetic process|gamma-aminobutyric acid metabolic process|oxidation-reduction process|regulation of gene expression|G1 to G0 transition|taurine metabolic process|spinal cord …	rno00260	Glycine, serine and threonine metabolism
Plin1	333.483596	553.4212041	113.5459878	0.205171011	-2.285101192	8.65E-27	8.10E-23	Down	4.44066	5.04643	6.18339	0.819807	1.11199	1.18692	GeneID:25629,Genbank:XM_008759499.2,RGD:3351	perilipin 1	GO:0005811,GO:0005829,GO:0008150,GO:0016042,GO:0003674,GO:0005783	lipid droplet|cytosol|biological_process|lipid catabolic process|molecular_function|endoplasmic reticulum	rno04371,rno04923,rno03320,rno04714	Apelin signaling pathway|Regulation of lipolysis in adipocyte|PPAR signaling pathway|Thermogenesis
Pnpla3	157.616712	277.4326563	37.80076768	0.136252048	-2.875650177	0.000693367	0.248903779	Down	0.725448	1.84652	2.60017	0.183831	0.153008	0.323793	GeneID:362972,Genbank:XM_017594995.1,RGD:1595843	patatin-like phospholipase domain containing 3	GO:0034389,GO:0004623,GO:0035727,GO:0004806,GO:0036042,GO:0005737,GO:0005811,GO:0006650,GO:0036153,GO:0006654,GO:0042171,GO:0016020,GO:0051264,GO:0051265,GO:0019432,GO:0001676,GO:0055088,GO:0019433,GO:0002021,GO:0003824	lipid particle organization|phospholipase A2 activity|lysophosphatidic acid binding|triglyceride lipase activity|long-chain fatty acyl-CoA binding|cytoplasm|lipid droplet|glycerophospholipid metabolic process|triglyceride acyl-chain remodeling|phosphatidic acid biosynthetic process|lysophosphatidic acid acyltransferase activity|membrane|mono-olein transacylation activity|diolein transacylation ac…	rno00561	Glycerolipid metabolism
Prr32	8.473470601	14.87440365	2.072537556	0.139335842	-2.843361679	0.006128401	1	Down	0.186353	0.301607	0.370888	0.0179198	0.0565604	0.0195355	GeneID:683753,Genbank:XM_002728150.5,RGD:1583341	proline rich 32
RGD1565725	5.99042439	11.27173985	0.709108927	0.062910335	-3.990559153	0.004270919	0.822303763	Down	0.0998291	0.0502076	0.0863891	0	0.0168325	0	GeneID:289926,Genbank:NM_001308479.1,RGD:1565725	similar to hypothetical protein FLJ23834
RT1-CE10	924.8960216	524.4198797	1325.372163	2.527311063	1.337603243	0.003915278	0.805901959	Up	2.15799	1.73693	2.95581	3.60999	6.03752	7.32755	GeneID:414792,Genbank:XM_017601729.1,RGD:1359292	RT1 class I, locus CE10	GO:0006955,GO:0016021,GO:0042605,GO:0042612,GO:0002474,GO:0005102,GO:0005886	immune response|integral component of membrane|peptide antigen binding|MHC class I protein complex|antigen processing and presentation of peptide antigen via MHC class I|signaling receptor binding|plasma membrane	rno04514,rno04144,rno04145,rno04218,rno04650,rno04612,rno05203,rno05320,rno05330,rno05332,rno05416,rno04940,rno05166,rno05168,rno05167,rno05169,rno05165	Cell adhesion molecules (CAMs)|Endocytosis|Phagosome|Cellular senescence|Natural killer cell mediated cytotoxicity|Antigen processing and presentation|Viral carcinogenesis|Autoimmune thyroid disease|Allograft rejection|Graft-versus-host disease|Viral myocarditis|Type I diabetes mellitus|HTLV-I infection|Herpes simplex infection|Kaposi's sarcoma-associated herpesvirus infection|Epstein-Barr virus …
Rbp7	16.72326148	25.77608722	7.670435732	0.297579523	-1.748652841	0.011187894	1	Down	0.492249	0.911596	1.00469	0.253257	0.150805	0.273736	GeneID:362662,Genbank:NM_001108693.1,RGD:1562168	retinol binding protein 7	GO:0005501	retinoid binding
Retn	114.3560717	185.2452615	43.46688195	0.234645041	-2.091448125	3.32E-11	1.55E-07	Down	7.76991	8.57309	12.7776	1.98368	2.06713	2.09252	GeneID:246250,Genbank:NM_144741.1,RGD:628781	resistin	GO:2000872,GO:0005615,GO:0005634,GO:0007568,GO:0009612,GO:0010469,GO:0010714,GO:0014911,GO:0032868,GO:0045444,GO:0048661,GO:0005179,GO:0050806,GO:0005576,GO:2000252	positive regulation of progesterone secretion|extracellular space|nucleus|aging|response to mechanical stimulus|regulation of signaling receptor activity|positive regulation of collagen metabolic process|positive regulation of smooth muscle cell migration|response to insulin|fat cell differentiation|positive regulation of smooth muscle cell proliferation|hormone activity|positive regulation of sy…
Rpl39l	10.40128734	4.653874595	16.14870009	3.469947407	1.794913797	0.04198761	1	Up	0.115265	0.569645	0	0.606016	1.12993	0.40441	GeneID:497860,Genbank:NM_001195471.1,RGD:1561345	ribosomal protein L39-like	GO:0007283,GO:0022625,GO:0003723,GO:0003735,GO:0006412	spermatogenesis|cytosolic large ribosomal subunit|RNA binding|structural constituent of ribosome|translation	rno03010	Ribosome
Rprml	57.80661356	36.44555508	79.16767205	2.172217487	1.119168556	0.003036153	0.677025919	Up	1.36295	1.22403	1.39392	2.67901	3.23342	2.19283	GeneID:685826,Genbank:NM_001109481.1,RGD:1589060	reprimo-like	GO:0016021	integral component of membrane
Rtkn	37.76247601	60.02849899	15.49645304	0.2581516	-1.953709557	3.00E-05	0.025514379	Down	0.027503	0.202728	0.015619	0.0326495	0.0375737	0.0354668	GeneID:297383,Genbank:XM_008763054.2,RGD:727874	rhotekin	GO:0030865,GO:0005095,GO:0031106,GO:0032185,GO:0005525,GO:0005622,GO:0005826,GO:0006915,GO:0007165,GO:0034260,GO:0007266,GO:0042981,GO:0017048,GO:1904498,GO:0017049,GO:0000281,GO:0000915	cortical cytoskeleton organization|GTPase inhibitor activity|septin ring organization|septin cytoskeleton organization|GTP binding|intracellular|actomyosin contractile ring|apoptotic process|signal transduction|negative regulation of GTPase activity|Rho protein signal transduction|regulation of apoptotic process|Rho GTPase binding|protein localization to mitotic actomyosin contractile ring|GTP-Rh…
S100b	146.0450296	195.5311475	96.55891181	0.493828799	-1.01791712	7.85E-05	0.047446137	Down	2.39631	1.83409	2.6466	0.936091	1.17454	1.25548	GeneID:25742,Genbank:XM_017601568.1,RGD:3615	S100 calcium binding protein B	GO:0060291,GO:0048168,GO:0031643,GO:0005515,GO:0071456,GO:0048306,GO:0042802,GO:0005615,GO:2001015,GO:0048471,GO:0042803,GO:0005634,GO:0048708,GO:0005737,GO:0007611,GO:0050786,GO:0043025,GO:0007613,GO:0043065,GO:0008270,GO:0050806,GO:0043123,GO:0001726,GO:0051384,GO:0044548,GO:0008284,GO:0005102,GO:0051597,GO:0048156,GO:0008360,GO:0005509	long-term synaptic potentiation|regulation of neuronal synaptic plasticity|positive regulation of myelination|protein binding|cellular response to hypoxia|calcium-dependent protein binding|identical protein binding|extracellular space|negative regulation of skeletal muscle cell differentiation|perinuclear region of cytoplasm|protein homodimerization activity|nucleus|astrocyte differentiation|cyto…
Sbk3	27.20003845	38.12742087	16.27265603	0.426796664	-1.228379196	0.04972662	1	Down	0.524328	0.355857	0.484026	0.365053	0.0645081	0.0687	GeneID:691408,Genbank:XM_001078116.6,RGD:1583965	SH3 domain binding kinase family, member 3	GO:0004674,GO:0005524,GO:0006468	protein serine/threonine kinase activity|ATP binding|protein phosphorylation
Scd	12564.64936	17165.93697	7963.361755	0.46390487	-1.108099104	0.000821999	0.27494409	Down	61.1308	86.1587	117.062	43.0296	36.0214	36.8969	GeneID:246074,Genbank:XM_006231433.2,RGD:621176	stearoyl-CoA desaturase	GO:0005783,GO:0005789,GO:0006633,GO:0006636,GO:0034435,GO:0043231,GO:0044130,GO:0006641,GO:0046872,GO:0048733,GO:0050830,GO:0050872,GO:0050873,GO:0055114,GO:0070542,GO:0004768,GO:0005506,GO:0005730,GO:0008610,GO:0016021,GO:0016491,GO:0030176,GO:1903699,GO:0032896,GO:1903966,GO:0033561,GO:0034434	endoplasmic reticulum|endoplasmic reticulum membrane|fatty acid biosynthetic process|unsaturated fatty acid biosynthetic process|cholesterol esterification|intracellular membrane-bounded organelle|negative regulation of growth of symbiont in host|triglyceride metabolic process|metal ion binding|sebaceous gland development|defense response to Gram-positive bacterium|white fat cell differentiation|…	rno01040,rno04152,rno03320	Biosynthesis of unsaturated fatty acids|AMPK signaling pathway|PPAR signaling pathway
Serpina11	21.34655669	12.57107207	30.12204131	2.396139418	1.260711853	0.037687669	1	Up	0.0633281	0.0785737	0.0966512	0.10484	0.294317	0.278635	GeneID:362774,Genbank:XM_006240481.2,RGD:1359239	serpin family A member 11	GO:0010951,GO:0004867,GO:0005615	negative regulation of endopeptidase activity|serine-type endopeptidase inhibitor activity|extracellular space
Six2	15.68816014	25.23985512	6.13646516	0.243126006	-2.040223877	0.004346168	0.822303763	Down	0.799412	0.769563	0.453764	0.0761008	0.179304	0.194448	GeneID:366542,Genbank:NM_001191908.1,RGD:1310792	SIX homeobox 2	GO:0072028,GO:0042474,GO:0001822,GO:0072038,GO:0043565,GO:0002062,GO:0072137,GO:0044877,GO:0003337,GO:0072161,GO:0003700,GO:0005634,GO:0006606,GO:0007501,GO:0045596,GO:0008134,GO:0090189,GO:0045944,GO:0008283,GO:0097168,GO:0048557,GO:0009948,GO:1902732,GO:0048701,GO:0016477,GO:0000978,GO:0048704,GO:0030278,GO:0001077,GO:0072006,GO:0032330,GO:0001656	nephron morphogenesis|middle ear morphogenesis|kidney development|mesenchymal stem cell maintenance involved in nephron morphogenesis|sequence-specific DNA binding|chondrocyte differentiation|condensed mesenchymal cell proliferation|protein-containing complex binding|mesenchymal to epithelial transition involved in metanephros morphogenesis|mesenchymal cell differentiation involved in kidney deve…
Slc25a22	12.11767221	4.62220351	19.61314092	4.24324478	2.085167906	0.013700738	1	Up	0.0203303	0.0398129	0.0406933	0.151952	0.156511	0.246141	GeneID:309111,Genbank:NM_001014027.1,RGD:1307826	solute carrier family 25 member 22	GO:0005743,GO:0006839,GO:0015813,GO:0016021,GO:0005313,GO:0005314	mitochondrial inner membrane|mitochondrial transport|L-glutamate transmembrane transport|integral component of membrane|L-glutamate transmembrane transporter activity|high-affinity glutamate transmembrane transporter activity
Slc26a3	86.90675523	122.7497199	51.06379053	0.415999243	-1.265347193	0.000130706	0.068252719	Down	0.852879	0.792947	0.840201	0.480534	0.158805	0.351441	GeneID:114629,Genbank:NM_053755.2,RGD:620623	solute carrier family 26 member 3	GO:0060081,GO:0019532,GO:0015106,GO:0071320,GO:0031526,GO:0015108,GO:0015116,GO:0015301,GO:0042391,GO:0097225,GO:0048240,GO:0015701,GO:0016020,GO:1902358,GO:0051453,GO:0005254,GO:0051454,GO:0016324,GO:0005887,GO:1902476,GO:0019531,GO:0008271	membrane hyperpolarization|oxalate transport|bicarbonate transmembrane transporter activity|cellular response to cAMP|brush border membrane|chloride transmembrane transporter activity|sulfate transmembrane transporter activity|anion:anion antiporter activity|regulation of membrane potential|sperm midpiece|sperm capacitation|bicarbonate transport|membrane|sulfate transmembrane transport|regulation…	rno04972,rno04978	Pancreatic secretion|Mineral absorption
Slc2a4	330.2017732	463.5665692	196.8369772	0.424614263	-1.235775262	9.56E-05	0.054279985	Down	3.44375	3.83161	5.66962	1.56606	1.46933	2.08668	GeneID:25139,Genbank:XM_006246596.3,RGD:2711	solute carrier family 2 member 4	GO:0005886,GO:0005887,GO:0005905,GO:0009897,GO:0009986,GO:0010021,GO:0032869,GO:0012505,GO:0012506,GO:0042383,GO:0042593,GO:1904659,GO:0043231,GO:0044381,GO:0045121,GO:0005355,GO:0005515,GO:0005737,GO:0005768,GO:0005771,GO:0005829,GO:0016020,GO:0016021,GO:0030136,GO:0030140,GO:0030315,GO:0030659,GO:0045471,GO:0031982,GO:0046323,GO:0032593,GO:0048471,GO:0050873,GO:0055056,GO:0070062,GO:0071356,GO:…	plasma membrane|integral component of plasma membrane|clathrin-coated pit|external side of plasma membrane|cell surface|amylopectin biosynthetic process|cellular response to insulin stimulus|endomembrane system|vesicle membrane|sarcolemma|glucose homeostasis|glucose transmembrane transport|intracellular membrane-bounded organelle|glucose import in response to insulin stimulus|membrane raft|glucos…	rno04068,rno04152,rno04910,rno04920,rno04930,rno04931	FoxO signaling pathway|AMPK signaling pathway|Insulin signaling pathway|Adipocytokine signaling pathway|Type II diabetes mellitus|Insulin resistance
Slc36a2	51.7551666	83.5473223	19.9630109	0.238942558	-2.06526426	0.000384639	0.171539773	Down	0.444318	0.841311	1.18949	0.159191	0.200058	0.242342	GeneID:246235,Genbank:NM_139339.1,RGD:620492	solute carrier family 36 member 2	GO:0070881,GO:0015816,GO:0015187,GO:0005280,GO:1900925,GO:0005302,GO:1902600,GO:0015824,GO:0015193,GO:0005774,GO:0016021,GO:0005886,GO:0010155,GO:0015078,GO:0015171,GO:0032973,GO:0015180,GO:0035524,GO:0015808,GO:0003333	regulation of proline transport|glycine transport|glycine transmembrane transporter activity|amino acid:proton symporter activity|positive regulation of glycine import across plasma membrane|L-tyrosine transmembrane transporter activity|proton transmembrane transport|proline transport|L-proline transmembrane transporter activity|vacuolar membrane|integral component of membrane|plasma membrane|reg…
Stmn2	59.5029651	90.78327267	28.22265752	0.31087949	-1.685572655	6.61E-06	0.009517112	Down	1.02571	1.08592	1.00829	0.246821	0.425673	0.268691	GeneID:84510,Genbank:NM_053440.2,RGD:68947	stathmin 2	GO:0043025,GO:0030426,GO:0005737,GO:0031115,GO:0005768,GO:0048306,GO:0005794,GO:0048471,GO:0007019,GO:0007026,GO:0010976,GO:0031117,GO:0010977,GO:0051493,GO:0031175,GO:0015631,GO:1990090,GO:0031982,GO:0016020,GO:0043005,GO:0030027,GO:0005515	neuronal cell body|growth cone|cytoplasm|negative regulation of microtubule polymerization|endosome|calcium-dependent protein binding|Golgi apparatus|perinuclear region of cytoplasm|microtubule depolymerization|negative regulation of microtubule depolymerization|positive regulation of neuron projection development|positive regulation of microtubule depolymerization|negative regulation of neuron p…
Sv2c	232.6554397	383.6263531	81.68452626	0.212927307	-2.231567114	0.008270532	1	Down	0.422983	1.47735	0.922132	0.279178	0.130167	0.18036	GeneID:29643,Genbank:XM_017590796.1,RGD:619718	synaptic vesicle glycoprotein 2c	GO:0008021,GO:0016021,GO:0022857,GO:0030054,GO:0030672,GO:0043005,GO:0055085,GO:0005515,GO:0006836,GO:0007268	synaptic vesicle|integral component of membrane|transmembrane transporter activity|cell junction|synaptic vesicle membrane|neuron projection|transmembrane transport|protein binding|neurotransmitter transport|chemical synaptic transmission	rno04512	ECM-receptor interaction
Tbx18	121.7658612	170.4849723	73.04675012	0.428464451	-1.222752583	9.99E-06	0.012475027	Down	0.954283	0.983893	0.835493	0.314375	0.488979	0.302499	GeneID:315870,Genbank:NM_001108173.1,RGD:1309856	T-box18	GO:0060829,GO:0009948,GO:0001078,GO:0070722,GO:0016331,GO:0001085,GO:0072001,GO:0022409,GO:0001106,GO:0072189,GO:0001756,GO:0002053,GO:0003163,GO:0003674,GO:0030154,GO:0005575,GO:0090103,GO:0042803,GO:0005634,GO:2000729,GO:0046982,GO:0048646,GO:0006351,GO:0000122,GO:0050679,GO:0007605,GO:0000976,GO:0051145,GO:0008150,GO:0000978	negative regulation of canonical Wnt signaling pathway involved in neural plate anterior/posterior pattern formation|anterior/posterior axis specification|transcriptional repressor activity, RNA polymerase II proximal promoter sequence-specific DNA binding|Tle3-Aes complex|morphogenesis of embryonic epithelium|RNA polymerase II transcription factor binding|renal system development|positive regula…
Themis	82.751619	118.474405	47.02883303	0.396953528	-1.332957976	0.047073484	1	Down	0.428015	0.46004	1.09284	0.370474	0.156472	0.213205	GeneID:498985,Genbank:XM_017589835.1,RGD:1560849	thymocyte selection associated	GO:0008180,GO:0043368,GO:0043383,GO:0050852,GO:0005634,GO:0005737,GO:0005911	COP9 signalosome|positive T cell selection|negative T cell selection|T cell receptor signaling pathway|nucleus|cytoplasm|cell-cell junction
Thrsp	1439.207814	2553.20514	325.2104876	0.127373427	-2.972863769	0.000287275	0.141604017	Down	22.0835	48.1786	72.9485	3.63602	5.27184	8.69504	GeneID:25357,Genbank:NM_012703.2,RGD:3859	thyroid hormone responsive	GO:0046890,GO:0005829,GO:0006351,GO:0006355,GO:0006629,GO:0010866,GO:0042802,GO:0042803,GO:0005634,GO:0005654	regulation of lipid biosynthetic process|cytosol|transcription, DNA-templated|regulation of transcription, DNA-templated|lipid metabolic process|regulation of triglyceride biosynthetic process|identical protein binding|protein homodimerization activity|nucleus|nucleoplasm
Tmprss11a	74.49849721	121.9976835	26.99931094	0.22131003	-2.175859261	0.000871885	0.286513575	Down	1.39232	0.692294	0.786822	0.130542	0.280315	0.200401	GeneID:686581,Genbank:XM_008770103.1,RGD:1596322	transmembrane protease, serine 11A	GO:0004252,GO:0006508,GO:0016021	serine-type endopeptidase activity|proteolysis|integral component of membrane
Tp63	54.85073384	77.95137687	31.7500908	0.40730635	-1.295813788	0.00071757	0.248903779	Down	0.19	0.130356	0.172804	0.0485387	0.0634873	0.068987	GeneID:246334,Genbank:NM_001127339.1,RGD:620863	tumor protein p63	GO:1902808,GO:1904674,GO:1904888,GO:2000271,GO:2000381,GO:2000773,GO:2001235,GO:0001738,GO:0001942,GO:0002039,GO:0002053,GO:0002064,GO:0003677,GO:0005791,GO:0003682,GO:0005794,GO:0003684,GO:0005829,GO:0006338,GO:0006366,GO:0010165,GO:0006974,GO:0010259,GO:0006978,GO:0010332,GO:0007219,GO:0010481,GO:0010482,GO:0010838,GO:0000122,GO:0035115,GO:0019904,GO:0035116,GO:0030154,GO:0000785,GO:0036342,GO:…	positive regulation of cell cycle G1/S phase transition|positive regulation of somatic stem cell population maintenance|cranial skeletal system development|positive regulation of fibroblast apoptotic process|negative regulation of mesoderm development|negative regulation of cellular senescence|positive regulation of apoptotic signaling pathway|morphogenesis of a polarized epithelium|hair follicle…	rno05206	MicroRNAs in cancer
Trat1	31.19117473	43.03233962	19.35000984	0.449662045	-1.15308698	0.020762106	1	Down	0.369746	0.578555	0.504916	0.234231	0.13348	0.255657	GeneID:498075,Genbank:NM_001037981.1,RGD:1563011	T cell receptor associated transmembrane adaptor 1	GO:0042101,GO:0050850,GO:0050862,GO:0051051,GO:0001920,GO:0005886,GO:0016021	T cell receptor complex|positive regulation of calcium-mediated signaling|positive regulation of T cell receptor signaling pathway|negative regulation of transport|negative regulation of receptor recycling|plasma membrane|integral component of membrane
Trim29	15.88336018	25.19045161	6.576268742	0.261061963	-1.937535825	0.007296995	1	Down	0.203592	0.167999	0.195464	0.0535141	0.0470986	0.00832571	GeneID:300656,Genbank:NM_001106815.1,RGD:1307858	tripartite motif-containing 29	GO:0005913,GO:0008270,GO:0042802,GO:0098609,GO:0098641,GO:1900181,GO:0000122,GO:0002039,GO:0005737	cell-cell adherens junction|zinc ion binding|identical protein binding|cell-cell adhesion|cadherin binding involved in cell-cell adhesion|negative regulation of protein localization to nucleus|negative regulation of transcription by RNA polymerase II|p53 binding|cytoplasm
UST4r	4.807755412	0.654007876	8.961502948	13.70243887	3.776360794	0.015772919	1	Up	0	0	0.0135501	0.109475	0.0525063	0.118362	GeneID:171397,Genbank:NM_134379.1,RGD:620976	integral membrane transport protein UST4r	GO:0015347,GO:0015698,GO:0015747,GO:0016021,GO:0022857,GO:0043252,GO:0055085,GO:0005452,GO:0005887,GO:0015143	sodium-independent organic anion transmembrane transporter activity|inorganic anion transport|urate transport|integral component of membrane|transmembrane transporter activity|sodium-independent organic anion transport|transmembrane transport|inorganic anion exchanger activity|integral component of plasma membrane|urate transmembrane transporter activity
Unc80	6.686850913	11.28151942	2.092182403	0.185452183	-2.430880846	0.033314817	1	Down	0.0145944	0.0195112	0.0117304	0	0.00162049	0.00503978	GeneID:689991,Genbank:XM_008767349.2,RGD:1309976	unc-80 homolog, NALCN activator
Vat1l	6.473737516	11.63004953	1.317425499	0.11327772	-3.142063957	0.012439138	1	Down	0.085193	0.0728006	0.0439625	0.011457	0.00603067	0.00624062	GeneID:361414,Genbank:XM_003751883.4,RGD:1598315	vesicle amine transport 1-like	GO:0008270,GO:0016491,GO:0055114	zinc ion binding|oxidoreductase activity|oxidation-reduction process
Wdr54	22.03795521	8.303749829	35.77216059	4.307952591	2.107002373	0.000586895	0.231550963	Up	0.00757065	0.0112144	0.00384656	0.0744559	0.00368653	0.10036	GeneID:500226,Genbank:NM_001109245.1,RGD:1561494	WD repeat domain 54
Wnt2b	331.1566891	459.5733614	202.7400169	0.441148321	-1.1806643	0.009795732	1	Down	1.12042	0.992138	0.595983	0.497211	0.193649	0.487658	GeneID:116466,Genbank:XM_017590582.1,RGD:69346	wingless-type MMTV integration site family, member 2B	GO:0060070,GO:0005575,GO:0060492,GO:0005578,GO:0060638,GO:0005615,GO:0008150,GO:0008584,GO:0009267,GO:0016055,GO:0071425,GO:0090190,GO:0021871,GO:0090263,GO:0030182,GO:0043231,GO:0002062,GO:0003674,GO:0045165,GO:0005109	canonical Wnt signaling pathway|cellular_component|lung induction|proteinaceous extracellular matrix|mesenchymal-epithelial cell signaling|extracellular space|biological_process|male gonad development|cellular response to starvation|Wnt signaling pathway|hematopoietic stem cell proliferation|positive regulation of branching involved in ureteric bud morphogenesis|forebrain regionalization|positive…	rno04310,rno04390,rno04150,rno04550,rno04916,rno05200,rno05205,rno05225,rno05226,rno05217,rno05224,rno04934,rno05166,rno05165	Wnt signaling pathway|Hippo signaling pathway|mTOR signaling pathway|Signaling pathways regulating pluripotency of stem cells|Melanogenesis|Pathways in cancer|Proteoglycans in cancer|Hepatocellular carcinoma|Gastric cancer|Basal cell carcinoma|Breast cancer|Cushing's syndrome|HTLV-I infection|Human papillomavirus infection
