# Supplementary material for: Comprehensive Analysis of the Profiles of Differentially Expressed mRNAs, lncRNAs, and circRNAs in Phosgene-Induced Acute Lung Injury
Source: Biomed Res Int. 2021 Jan 9;2021:6278526. doi: 10.1155/2021/6278526 (PMC7811572; doi:10.1155/2021/6278526)
Supplement: Supplementary 8 — Table S8: differentially expressed lncRNAs between the A and C group. [file 6278526.f8.txt]

Table S8 Differentially expressed lncRNAs between A and C group
lncRNA_id	BaseMean	BaseMean_control_A	BaseMean_case_C	FoldChange	log2FoldChange	pValue	qValue	Regulation	Expression_A1	Expression_A2	Expression_A3	Expression_C1	Expression_C2	Expression_C3	Chrom	Start	End	Strand	lncRNA_symbol	partnerRNA_transcript	distance	direction	type	location	subtype	partnerRNA_gene	Dbxref	product	GO_id	GO_term	pathway	pathway_description
ENSRNOT00000071091	46.71016003	0.945476651	92.47484342	97.80764369	6.611875311	0.001482063	1	Up	0.06902152	0.2267701	2.61E-07	0.000417991	13.35358	11.92274	Chr7	116444687	116446993	+	Ly6l	XM_003750366.1	0	sense	genic	exonic	overlapping	Ly6l	GeneID:686432,Genbank:XM_003750366.1,RGD:1597652	lymphocyte antigen 6 complex, locus L
ENSRNOT00000076148	54.0642305	29.4271343	78.7013267	2.674447532	1.419240901	0.04292921	1	Up	5.900448	1.959237	1.646934	7.637347	5.251286	10.83223	Chr7	116373728	116379331	-	AABR07058441.1	XM_017595248.1	0	sense	genic	exonic	overlapping	LOC300024	GeneID:300024,Genbank:XM_017595248.1,RGD:1586182	similar to Ly6-B antigen gene, transcript variant X2
ENSRNOT00000077198	5.07980143	0.641609977	9.517992883	14.83454625	3.890888894	0.038738919	1	Up	9.19E-12	0.1624082	8.81E-24	4.34E-05	1.240059	1.189485	Chr20	4426982	4428527	-	AABR07044388.3	NM_001013197.2	0	sense	genic	intronic	nested	Stk19	GeneID:361800,Genbank:NM_001013197.2,RGD:1359601	serine/threonine kinase 19	GO:0016607	nuclear speck
ENSRNOT00000077804	4.13477769	0.352617693	7.916937687	22.45190142	4.488765725	0.020794386	1	Up	3.60E-25	1.22E-26	0.02859741	0.1568045	0.05836049	0.3452211	Chr1	278476630	278480271	-	AABR07007055.1	XM_006231658.3	0	sense	genic	exonic	overlapping	LOC100911751	GeneID:100911751,Genbank:XM_006231658.3,RGD:6490816	GDNF family receptor alpha-1-like, transcript variant X1
ENSRNOT00000078281	18.01637321	27.65103032	8.381716105	0.303124911	-1.722015676	0.046375145	1	Down	1.427843	1.205871	1.20592	0.1048208	0.1307889	0.9339	Chr7	415625	454111	+	AABR07055191.1	XM_017595375.1	0	sense	genic	intronic	overlapping	LOC102554748	GeneID:102554748,Genbank:XM_017595375.1,RGD:7604647	nidogen-2-like, transcript variant X1
ENSRNOT00000081704	42.04099216	23.08477451	60.99720981	2.642313434	1.401801611	0.044498153	1	Up	1.25443	0.7818612	1.573764	3.721881	2.965633	2.661812	Chr20	4872634	4873955	-	LOC102549726	NM_031971.2	3683	sense	intergenic	downstream	same_strand	Hspa1a	GeneID:24472,Genbank:NM_031971.2,RGD:2840	heat shock 70kD protein 1A	GO:0097201,GO:0097718,GO:1901029,GO:1901673,GO:0005524,GO:0005622,GO:1902236,GO:0005634,GO:1902380,GO:1903265,GO:1904722,GO:0006952,GO:0005737,GO:0006986,GO:0007339,GO:0008180,GO:0016887,GO:0019899,GO:0008285,GO:0030308,GO:0030512,GO:0031072,GO:0000151,GO:0034605,GO:0031249,GO:0001106,GO:0034620,GO:0031396,GO:0042026,GO:0031397,GO:0001664,GO:0001916,GO:0002020,GO:0042623,GO:0002199,GO:0005102,GO:…	negative regulation of transcription from RNA polymerase II promoter in response to stress|disordered domain specific binding|negative regulation of mitochondrial outer membrane permeabilization involved in apoptotic signaling pathway|regulation of mitotic spindle assembly|ATP binding|intracellular|negative regulation of endoplasmic reticulum stress-induced intrinsic apoptotic signaling pathway|n…	rno03040,rno04141,rno04010,rno04144,rno04612,rno04915,rno04213,rno05020,rno05134,rno05162,rno05164,rno05169,rno05145	Spliceosome|Protein processing in endoplasmic reticulum|MAPK signaling pathway|Endocytosis|Antigen processing and presentation|Estrogen signaling pathway|Longevity regulating pathway - multiple species|Prion diseases|Legionellosis|Measles|Influenza A|Epstein-Barr virus infection|Toxoplasmosis
ENSRNOT00000082897	18.04196893	28.48474456	7.599193298	0.266781164	-1.906271288	0.028351752	1	Down	2.767937	2.956985	1.167809	0.4726043	0.46344	0.7793119	Chr20	56198049	56199332	+	AABR07045680.1	NM_001100804.1	1088	antisense	intergenic	upstream	divergent	Cd99	GeneID:652929,Genbank:NM_001100804.1,RGD:1594332	CD99 molecule	GO:0034109,GO:0072683,GO:2000391,GO:0001773,GO:0009986,GO:0016021	homotypic cell-cell adhesion|T cell extravasation|positive regulation of neutrophil extravasation|myeloid dendritic cell activation|cell surface|integral component of membrane	rno04514,rno04670	Cell adhesion molecules (CAMs)|Leukocyte transendothelial migration
ENSRNOT00000084474	3.607354674	7.214709348	0	0	#NAME?	0.011163665	1	Down	0.04912635	0.3055855	0.121479	1.13E-15	4.78E-31	2.98E-10	Chr15	30218106	30219999	-	AABR07017701.1	XM_017599875.1	42578	sense	intergenic	upstream	same_strand	LOC688340	GeneID:688340,Genbank:XM_017599875.1	T-cell receptor alpha chain V region PHDS58-like, transcript variant X1
ENSRNOT00000085218	2.831768458	0	5.663536917	Inf	Inf	0.028482394	1	Up	0	0	0	0.3482504	0.3576644	1.53576	Chr3	58301130	58302010	-	AABR07052504.1
ENSRNOT00000085383	2.475833324	0	4.951666649	Inf	Inf	0.044237634	1	Up	9.61E-26	5.28E-11	1.59E-21	0.1282775	0.1199674	0.128952	Chr4	5721261	5773301	-	AABR07059159.1	XM_006235966.3	0	sense	genic	exonic	overlapping	LOC100910079	GeneID:100910079,Genbank:XM_006235966.3,RGD:6500542	actin-related protein 3B-like, transcript variant X1
ENSRNOT00000086366	32.57687224	9.009610519	56.14413395	6.231582801	2.639598649	0.000723235	0.870921945	Up	0.02158641	0.1679665	0.1461412	0.5903426	1.03321	0.4935599	Chr4	104454	109989	+	AABR07058985.2	XM_006235840.3	0	sense	genic	exonic	overlapping	Kmt2c	GeneID:502710,Genbank:XM_006235840.3,RGD:1587205	lysine methyltransferase 2C, transcript variant X1	GO:0007338,GO:0008150,GO:0010468,GO:0016571,GO:0035097,GO:0035264,GO:0042800,GO:0044666,GO:0048146,GO:0061029,GO:0003674,GO:0005575,GO:0005634	single fertilization|biological_process|regulation of gene expression|histone methylation|histone methyltransferase complex|multicellular organism growth|histone methyltransferase activity (H3-K4 specific)|MLL3/4 complex|positive regulation of fibroblast proliferation|eyelid development in camera-type eye|molecular_function|cellular_component|nucleus	rno00310	Lysine degradation
ENSRNOT00000087589	46.02453923	0.705235387	91.34384308	129.5224897	7.017058812	1.20E-08	3.58E-05	Up	3.83E-09	0.008529168	0.06030629	2.326222	1.420654	4.176731	Chr14	61650937	61668509	+	LOC100910750	XM_003751372.3	0	sense	genic	exonic	containing	LOC100910750	GeneID:100910750,Genbank:XM_003751372.3,RGD:6497185	putative pre-mRNA-splicing factor ATP-dependent RNA helicase DHX15-like
ENSRNOT00000088470	10.25667655	2.307196405	18.20615669	7.891030279	2.980213676	0.010448077	1	Up	0.2144449	0.2075253	0.2467816	2.40237	0.4093688	2.64065	Chr7	38667228	38679464	+	AABR07056730.1	NM_024129.1	62786	sense	intergenic	upstream	same_strand	Dcn	GeneID:29139,Genbank:NM_024129.1,RGD:61895	decorin	GO:0045944,GO:0014068,GO:0005518,GO:0046426,GO:0016239,GO:0005539,GO:0047485,GO:0016525,GO:0005576,GO:0050840,GO:0005578,GO:0005589,GO:0005615,GO:0005737,GO:0019221,GO:0006469,GO:0051901,GO:0019800,GO:0007519,GO:0090141,GO:0031012,GO:0007568,GO:1900747,GO:0009612,GO:0001822,GO:0032496,GO:0010508,GO:0001890,GO:0042060,GO:0010596,GO:0004860	positive regulation of transcription by RNA polymerase II|positive regulation of phosphatidylinositol 3-kinase signaling|collagen binding|negative regulation of JAK-STAT cascade|positive regulation of macroautophagy|glycosaminoglycan binding|protein N-terminus binding|negative regulation of angiogenesis|extracellular region|extracellular matrix binding|proteinaceous extracellular matrix|collagen …	rno04350,rno05205	TGF-beta signaling pathway|Proteoglycans in cancer
ENSRNOT00000089143	13.4619938	22.17440253	4.749585078	0.214192246	-2.223021842	0.020284485	1	Down	2.161759	2.644296	1.199407	2.04E-47	0.4867131	0.7229343	Chr15	30883449	30884109	+	AABR07017770.2
ENSRNOT00000089440	21.91496295	43.8299259	0	0	#NAME?	2.89E-06	0.006446353	Down	2.534721	1.222529	3.790991	1.06E-09	2.71E-13	9.68E-05	Chr2	156399129	156406032	-	AABR07010986.1	XM_008761069.1	0	sense	genic	exonic	nested	LOC103691573	GeneID:103691573,Genbank:XM_008761069.1,RGD:9321667	uncharacterized LOC103691573, transcript variant X1
ENSRNOT00000089581	2.661878023	5.323756046	0	0	#NAME?	0.036877913	1	Down	5.78E-13	0.4241126	0.2537554	5.60E-05	1.33E-05	5.48E-05	Chr18	31295425	31305937	-	AABR07031740.1	XM_017601102.1	24144	sense	intergenic	downstream	same_strand	Pcdh1	GeneID:307481,Genbank:XM_017601102.1,RGD:1308490	protocadherin 1, transcript variant X1	GO:0043231,GO:0005634,GO:0005730,GO:0030054	intracellular membrane-bounded organelle|nucleus|nucleolus|cell junction
ENSRNOT00000089810	17.75112841	27.54030885	7.961947965	0.289101622	-1.79035139	0.042344686	1	Down	1.55291	0.6483462	0.41739	0.1389699	0.06752584	0.5322412	Chr1	88264315	88267181	+	AABR07002882.1	XM_008759231.2	0	sense	genic	exonic	nested	LOC100359523	GeneID:100359523,Genbank:XM_008759231.2,RGD:2323671	zinc finger protein 570-like, transcript variant X1
ENSRNOT00000090134	2.363691628	4.727383256	0	0	#NAME?	0.049644261	1	Down	0.1908314	0.3679119	2.42E-25	8.84E-21	1.46E-22	2.29E-25	Chr7	22495523	22497727	-	AABR07056330.1
ENSRNOT00000092811	4.733899472	0	9.467798944	Inf	Inf	0.041965774	1	Up	6.46E-12	5.08E-18	2.12E-16	1.22E-17	0.3107398	1.014374	Chr7	102648881	102791155	+	AABR07058158.1	NM_012603.2	57641	sense	intergenic	downstream	same_strand	Myc	GeneID:24577,Genbank:NM_012603.2,RGD:3130	myelocytomatosis oncogene	GO:0043066,GO:0043085,GO:0043279,GO:0043280,GO:0000987,GO:0001077,GO:0043388,GO:0001541,GO:0043473,GO:0001658,GO:0045787,GO:0043565,GO:0045821,GO:0044195,GO:0001701,GO:0045893,GO:0044330,GO:0001783,GO:0005634,GO:0002053,GO:0045944,GO:0002082,GO:0050910,GO:0046325,GO:0005635,GO:0051276,GO:0046722,GO:0005654,GO:0046982,GO:0051782,GO:0006352,GO:0006355,GO:0005719,GO:0051973,GO:0005730,GO:0060070,GO:…	negative regulation of apoptotic process|positive regulation of catalytic activity|response to alkaloid|positive regulation of cysteine-type endopeptidase activity involved in apoptotic process|proximal promoter sequence-specific DNA binding|transcriptional activator activity, RNA polymerase II proximal promoter sequence-specific DNA binding|positive regulation of DNA binding|ovarian follicle dev…	rno04010,rno04012,rno04310,rno04350,rno04390,rno04630,rno04151,rno04110,rno04218,rno04550,rno04919,rno05200,rno05230,rno05202,rno05206,rno05205,rno05210,rno05225,rno05226,rno05216,rno05221,rno05220,rno05219,rno05213,rno05224,rno05222,rno05166,rno05161,rno05167,rno05169	MAPK signaling pathway|ErbB signaling pathway|Wnt signaling pathway|TGF-beta signaling pathway|Hippo signaling pathway|Jak-STAT signaling pathway|PI3K-Akt signaling pathway|Cell cycle|Cellular senescence|Signaling pathways regulating pluripotency of stem cells|Thyroid hormone signaling pathway|Pathways in cancer|Central carbon metabolism in cancer|Transcriptional misregulation in cancers|MicroRNA…
ENSRNOT00000092896	13.78058719	3.462551523	24.09862285	6.959787511	2.79904326	0.030826411	1	Up	0.003641167	0.08374454	0.2909237	0.5466154	1.582703	0.4594838	Chr7	102650147	102869518	+	AABR07058158.1	NM_012603.2	58907	sense	intergenic	downstream	same_strand	Myc	GeneID:24577,Genbank:NM_012603.2,RGD:3130	myelocytomatosis oncogene	GO:0043066,GO:0043085,GO:0043279,GO:0043280,GO:0000987,GO:0001077,GO:0043388,GO:0001541,GO:0043473,GO:0001658,GO:0045787,GO:0043565,GO:0045821,GO:0044195,GO:0001701,GO:0045893,GO:0044330,GO:0001783,GO:0005634,GO:0002053,GO:0045944,GO:0002082,GO:0050910,GO:0046325,GO:0005635,GO:0051276,GO:0046722,GO:0005654,GO:0046982,GO:0051782,GO:0006352,GO:0006355,GO:0005719,GO:0051973,GO:0005730,GO:0060070,GO:…	negative regulation of apoptotic process|positive regulation of catalytic activity|response to alkaloid|positive regulation of cysteine-type endopeptidase activity involved in apoptotic process|proximal promoter sequence-specific DNA binding|transcriptional activator activity, RNA polymerase II proximal promoter sequence-specific DNA binding|positive regulation of DNA binding|ovarian follicle dev…	rno04010,rno04012,rno04310,rno04350,rno04390,rno04630,rno04151,rno04110,rno04218,rno04550,rno04919,rno05200,rno05230,rno05202,rno05206,rno05205,rno05210,rno05225,rno05226,rno05216,rno05221,rno05220,rno05219,rno05213,rno05224,rno05222,rno05166,rno05161,rno05167,rno05169	MAPK signaling pathway|ErbB signaling pathway|Wnt signaling pathway|TGF-beta signaling pathway|Hippo signaling pathway|Jak-STAT signaling pathway|PI3K-Akt signaling pathway|Cell cycle|Cellular senescence|Signaling pathways regulating pluripotency of stem cells|Thyroid hormone signaling pathway|Pathways in cancer|Central carbon metabolism in cancer|Transcriptional misregulation in cancers|MicroRNA…
ENSRNOT00000093124	2.452724509	4.905449018	0	0	#NAME?	0.046824193	1	Down	0.1298091	0.441513	0.2117689	1.32E-26	6.94E-16	6.00E-25	Chr7	102650123	102744760	+	AABR07058158.1	NM_012603.2	58883	sense	intergenic	downstream	same_strand	Myc	GeneID:24577,Genbank:NM_012603.2,RGD:3130	myelocytomatosis oncogene	GO:0043066,GO:0043085,GO:0043279,GO:0043280,GO:0000987,GO:0001077,GO:0043388,GO:0001541,GO:0043473,GO:0001658,GO:0045787,GO:0043565,GO:0045821,GO:0044195,GO:0001701,GO:0045893,GO:0044330,GO:0001783,GO:0005634,GO:0002053,GO:0045944,GO:0002082,GO:0050910,GO:0046325,GO:0005635,GO:0051276,GO:0046722,GO:0005654,GO:0046982,GO:0051782,GO:0006352,GO:0006355,GO:0005719,GO:0051973,GO:0005730,GO:0060070,GO:…	negative regulation of apoptotic process|positive regulation of catalytic activity|response to alkaloid|positive regulation of cysteine-type endopeptidase activity involved in apoptotic process|proximal promoter sequence-specific DNA binding|transcriptional activator activity, RNA polymerase II proximal promoter sequence-specific DNA binding|positive regulation of DNA binding|ovarian follicle dev…	rno04010,rno04012,rno04310,rno04350,rno04390,rno04630,rno04151,rno04110,rno04218,rno04550,rno04919,rno05200,rno05230,rno05202,rno05206,rno05205,rno05210,rno05225,rno05226,rno05216,rno05221,rno05220,rno05219,rno05213,rno05224,rno05222,rno05166,rno05161,rno05167,rno05169	MAPK signaling pathway|ErbB signaling pathway|Wnt signaling pathway|TGF-beta signaling pathway|Hippo signaling pathway|Jak-STAT signaling pathway|PI3K-Akt signaling pathway|Cell cycle|Cellular senescence|Signaling pathways regulating pluripotency of stem cells|Thyroid hormone signaling pathway|Pathways in cancer|Central carbon metabolism in cancer|Transcriptional misregulation in cancers|MicroRNA…
NR_036653.1	22.4123518	37.26424634	7.560457262	0.202887701	-2.301246684	0.006747714	1	Down	9.830793	8.496433	10.10315	2.189977	1.922375	1.602633	Chr1	218075359	218075511	+	Bc1	NM_001107565.1	484	sense	intergenic	upstream	same_strand	Oraov1	GeneID:309136,Genbank:NM_001107565.1,RGD:1304637	oral cancer overexpressed 1	GO:0006289,GO:0008150,GO:0030896,GO:0031573,GO:0033314,GO:0035861,GO:0044778,GO:0000724,GO:0003674,GO:0005575	nucleotide-excision repair|biological_process|checkpoint clamp complex|intra-S DNA damage checkpoint|mitotic DNA replication checkpoint|site of double-strand break|meiotic DNA integrity checkpoint|double-strand break repair via homologous recombination|molecular_function|cellular_component
TCONS_00001104	26.87846327	45.65639996	8.100526589	0.177423682	-2.494729505	0.021560565	1	Down	0.1813325	0.9140548	0.617292	0.04435027	0.2434959	2.51E-05	Chr1	153530506	153598327	+	XLOC_000496	NM_022623.2	0	sense	genic	exonic	overlapping	Fzd4	GeneID:64558,Genbank:NM_022623.2,RGD:71017	frizzled class receptor 4	GO:0007223,GO:0007605,GO:0008150,GO:0009986,GO:0010812,GO:0016021,GO:0016055,GO:0035567,GO:0038023,GO:0017147,GO:0042701,GO:0042803,GO:0042813,GO:0043507,GO:0045893,GO:0046982,GO:0001540,GO:0001553,GO:0001568,GO:0001570,GO:0004930,GO:0005575,GO:0005886,GO:0005911,GO:0007186,GO:0019955,GO:0030165,GO:0030425,GO:0030947,GO:0031625,GO:0051091,GO:0031987,GO:0060070,GO:0034446,GO:0035426,GO:0061299,GO:…	Wnt signaling pathway, calcium modulating pathway|sensory perception of sound|biological_process|cell surface|negative regulation of cell-substrate adhesion|integral component of membrane|Wnt signaling pathway|non-canonical Wnt signaling pathway|signaling receptor activity|Wnt-protein binding|progesterone secretion|protein homodimerization activity|Wnt-activated receptor activity|positive regulat…	rno04310,rno04390,rno04150,rno04550,rno04916,rno05200,rno05205,rno05225,rno05226,rno05217,rno05224,rno04934,rno05166,rno05165	Wnt signaling pathway|Hippo signaling pathway|mTOR signaling pathway|Signaling pathways regulating pluripotency of stem cells|Melanogenesis|Pathways in cancer|Proteoglycans in cancer|Hepatocellular carcinoma|Gastric cancer|Basal cell carcinoma|Breast cancer|Cushing's syndrome|HTLV-I infection|Human papillomavirus infection
TCONS_00007830	273.1152003	481.4495949	64.78080563	0.134553661	-2.893746449	0.03573238	1	Down	4.746029	39.70174	54.35095	0.6541167	8.272999	4.491423	Chr10	105084267	105084827	-	XLOC_003370	NM_001108307.1	0	antisense	genic	intronic	nested	Ten1	GeneID:360664,Genbank:NM_001108307.1,RGD:1311078	TEN1 CST complex subunit	GO:0032211,GO:0042162,GO:1990879,GO:0000784,GO:0003697,GO:0005634	negative regulation of telomere maintenance via telomerase|telomeric DNA binding|CST complex|nuclear chromosome, telomeric region|single-stranded DNA binding|nucleus
TCONS_00010821	19.22626968	30.56718811	7.885351242	0.257967832	-1.95473692	0.034978986	1	Down	6.401215	7.264641	1.946826	0	3.608043	0	Chr13	70645614	70647552	+	XLOC_004593	NM_053966.2	9175	antisense	intergenic	downstream	convergent	Lamc1	GeneID:117036,Genbank:NM_053966.2,RGD:621052	laminin subunit gamma 1	GO:0043208,GO:0005604,GO:0043259,GO:0005605,GO:0065003,GO:0005606,GO:0005615,GO:0007155,GO:0016477,GO:0022617,GO:0031012,GO:0031175,GO:0005201,GO:0031581,GO:0005578,GO:0034446	glycosphingolipid binding|basement membrane|laminin-10 complex|basal lamina|protein-containing complex assembly|laminin-1 complex|extracellular space|cell adhesion|cell migration|extracellular matrix disassembly|extracellular matrix|neuron projection development|extracellular matrix structural constituent|hemidesmosome assembly|proteinaceous extracellular matrix|substrate adhesion-dependent cell …	rno04151,rno04512,rno04510,rno05200,rno05222,rno05020,rno05165,rno05146,rno05145	PI3K-Akt signaling pathway|ECM-receptor interaction|Focal adhesion|Pathways in cancer|Small cell lung cancer|Prion diseases|Human papillomavirus infection|Amoebiasis|Toxoplasmosis
TCONS_00010992	15.83469331	0	31.66938662	Inf	Inf	0.012815969	1	Up	2.04E-10	0.00075094	0.000447852	3.483062	9.21E-08	11.03239	Chr13	91333997	91334306	+	XLOC_004673	XM_017599048.1	0	sense	genic	exonic	overlapping	LOC108352650	GeneID:108352650,Genbank:XM_017599048.1	40S ribosomal protein S29	GO:0008270,GO:0042788,GO:0002181,GO:0003735,GO:0005791	zinc ion binding|polysomal ribosome|cytoplasmic translation|structural constituent of ribosome|rough endoplasmic reticulum
TCONS_00011813	89.41257787	0	178.8251557	Inf	Inf	0.034182189	1	Up	2.19E-06	2.67E-12	7.99E-18	5.86E-11	12.37446	0.5858513	Chr14	5872276	5947034	+	XLOC_005046	XM_006250609.3	0	sense	genic	exonic	overlapping	Mpa2l	GeneID:305139,Genbank:XM_006250609.3,RGD:1561523	macrophage activation 2 like, transcript variant X2	GO:0003924,GO:0005525	GTPase activity|GTP binding
TCONS_00012104	681.0143852	74.27395627	1287.754814	17.33790522	4.115857696	0.006816166	1	Up	7.109434	12.10276	3.04682	187.1522	7.235331	179.3579	Chr14	46526161	46527403	+	XLOC_005158	XM_017599469.1	37506	antisense	intergenic	downstream	convergent	LOC108352751	GeneID:108352751,Genbank:XM_017599469.1	S-antigen protein-like
TCONS_00012137	23098.50646	11491.12529	34705.88762	3.020234027	1.594660343	0.006512097	1	Up	676.7164	615.7737	344.1906	1793.749	1493.994	1406.822	Chr14	46646280	46687939	+	XLOC_005158	XM_017599544.1	0	antisense	genic	intronic	containing	LOC108352829	GeneID:108352829,Genbank:XM_017599544.1	serine/arginine repetitive matrix protein 1-like
TCONS_00015640	25.58131202	45.75245321	5.410170825	0.118248759	-3.080103049	0.040024727	1	Down	4.296559	3.133544	9.71E-10	6.96E-08	0.1972563	0.6127207	Chr16	69179019	69232572	-	XLOC_006629	XM_008771324.2	0	sense	genic	exonic	overlapping	Erlin2	GeneID:290823,Genbank:XM_008771324.2,RGD:1309010	ER lipid raft associated 2, transcript variant X2	GO:0045717,GO:0005829,GO:0005886,GO:0008203,GO:0015485,GO:0016021,GO:0030433,GO:0031625,GO:0032933,GO:0005783,GO:0045121,GO:0005789,GO:0045541	negative regulation of fatty acid biosynthetic process|cytosol|plasma membrane|cholesterol metabolic process|cholesterol binding|integral component of membrane|ubiquitin-dependent ERAD pathway|ubiquitin protein ligase binding|SREBP signaling pathway|endoplasmic reticulum|membrane raft|endoplasmic reticulum membrane|negative regulation of cholesterol biosynthetic process
TCONS_00016066	15.08996461	1.604024943	28.57590428	17.81512464	4.155030672	0.035069393	1	Up	0.000267375	0.04833333	0.000329473	0.2532894	0.01483725	0.5558392	Chr17	27509193	27519649	+	XLOC_006793	NM_001008891.2	0	sense	genic	intronic	overlapping	Ssr1	GeneID:361233,Genbank:NM_001008891.2,RGD:1310961	signal sequence receptor subunit 1	GO:0006613,GO:0016021,GO:0005783,GO:0005789	cotranslational protein targeting to membrane|integral component of membrane|endoplasmic reticulum|endoplasmic reticulum membrane	rno04141	Protein processing in endoplasmic reticulum
TCONS_00016132	180.2334472	0	360.4668943	Inf	Inf	3.11E-09	1.39E-05	Up	0	0	0	23.0607	10.276	6.632537	Chr17	37612912	37622671	+	XLOC_006821	NM_001271205.1	0	sense	genic	exonic	containing	Sox4	GeneID:364712,Genbank:NM_001271205.1,RGD:1309488	SRY box 4	GO:0003183,GO:0003211,GO:0003215,GO:0003289,GO:0003357,GO:0003700,GO:0005634,GO:0030217,GO:0005654,GO:0031018,GO:0005737,GO:0031397,GO:0005739,GO:0031647,GO:0032024,GO:0035019,GO:0035910,GO:0060412,GO:0042593,GO:0060548,GO:0042769,GO:0060563,GO:0043065,GO:0060993,GO:0071333,GO:0090263,GO:2000761,GO:0000976,GO:0000981,GO:0001046,GO:0001077,GO:0001105,GO:0001501,GO:0001666,GO:0001841,GO:0002328,GO:…	mitral valve morphogenesis|cardiac ventricle formation|cardiac right ventricle morphogenesis|atrial septum primum morphogenesis|noradrenergic neuron differentiation|DNA binding transcription factor activity|nucleus|T cell differentiation|nucleoplasm|endocrine pancreas development|cytoplasm|negative regulation of protein ubiquitination|mitochondrion|regulation of protein stability|positive regulat…
TCONS_00016745	12.68460816	0	25.36921633	Inf	Inf	0.001484419	1	Up	1.44E-13	2.57E-08	0.000139328	4.439597	3.813458	0.01803681	Chr17	34150714	34204851	-	XLOC_007091	XM_008771604.1	0	sense	genic	exonic	overlapping	Foxf2	GeneID:364707,Genbank:XM_008771604.1,RGD:1589717	forkhead box F2, transcript variant X1	GO:0048566,GO:0003677,GO:0048596,GO:0003700,GO:0048806,GO:0005575,GO:0005634,GO:0005667,GO:0008134,GO:0008150,GO:0060021,GO:0030198,GO:0042249,GO:0043565,GO:0045892,GO:0000977,GO:0045893,GO:0001228,GO:0045944,GO:0003674	embryonic digestive tract development|DNA binding|embryonic camera-type eye morphogenesis|DNA binding transcription factor activity|genitalia development|cellular_component|nucleus|transcription factor complex|transcription factor binding|biological_process|roof of mouth development|extracellular matrix organization|establishment of planar polarity of embryonic epithelium|sequence-specific DNA bi…
TCONS_00017308	22.57961002	45.15922005	0	0	#NAME?	0.005831954	1	Down	12.63024	5.18E-16	3.704774	4.37E-05	0.001003282	0	Chr18	29104318	29164112	+	XLOC_007315	XM_008772062.2	0	sense	genic	exonic	overlapping	LOC102557111	GeneID:102557111,Genbank:XM_008772062.2,RGD:7498283	WAS/WASL-interacting protein family member 3-like, transcript variant X1
TCONS_00020266	12.90924901	24.26387374	1.554624277	0.064071561	-3.96417204	0.000532549	0.870921945	Down	0.4212229	0.797291	0.5830352	0.1095106	0.006448707	0.001290278	Chr2	198707013	198751924	+	XLOC_008618	XM_006232978.3	0	sense	genic	exonic	overlapping	Lix1l	GeneID:499677,Genbank:XM_006232978.3,RGD:1593161	Lix1-like, transcript variant X1	GO:0006914,GO:0008150,GO:0097352,GO:0003674,GO:0005575,GO:0005737	autophagy|biological_process|autophagosome maturation|molecular_function|cellular_component|cytoplasm
TCONS_00022102	160.0785539	20.30347445	299.8536333	14.76858722	3.884459918	0.018876873	1	Up	1.05E-05	6.575481	1.734182	5.756091	73.11301	39.9097	Chr20	2593811	2637759	+	XLOC_009419	NM_031504.3	13840	antisense	intergenic	downstream	convergent	C4a	GeneID:24233,Genbank:NM_031504.3,RGD:620005	complement component 4A (Rodgers blood group)	GO:0005576,GO:0005615,GO:0006954,GO:0006956,GO:0006958,GO:0010951,GO:0030054,GO:0030424,GO:0030425,GO:0003674,GO:0045087,GO:0004866,GO:0045202	extracellular region|extracellular space|inflammatory response|complement activation|complement activation, classical pathway|negative regulation of endopeptidase activity|cell junction|axon|dendrite|molecular_function|innate immune response|endopeptidase inhibitor activity|synapse	rno04610,rno05322,rno05133,rno05150	Complement and coagulation cascades|Systemic lupus erythematosus|Pertussis|Staphylococcus aureus infection
TCONS_00022340	62.70717345	11.99394848	113.4203984	9.4564687	3.241301543	0.014687631	1	Up	0.8878522	0.4671487	0.1988302	1.066547	4.460009	8.111548	Chr20	5355055	5383188	+	XLOC_009475	XM_017601545.1	0	sense	genic	intronic	containing	RT1-A2	GeneID:24974,Genbank:XM_017601545.1,RGD:1595923	RT1 class Ia, locus A2, transcript variant X1	GO:0005102,GO:0005515,GO:0005886,GO:0006955,GO:0009897,GO:0010977,GO:0016021,GO:0042605,GO:0042612,GO:0045121,GO:0001916,GO:0002474,GO:0002485	signaling receptor binding|protein binding|plasma membrane|immune response|external side of plasma membrane|negative regulation of neuron projection development|integral component of membrane|peptide antigen binding|MHC class I protein complex|membrane raft|positive regulation of T cell mediated cytotoxicity|antigen processing and presentation of peptide antigen via MHC class I|antigen processing…	rno04514,rno04144,rno04145,rno04218,rno04650,rno04612,rno05203,rno05320,rno05330,rno05332,rno05416,rno04940,rno05166,rno05168,rno05167,rno05169,rno05165	Cell adhesion molecules (CAMs)|Endocytosis|Phagosome|Cellular senescence|Natural killer cell mediated cytotoxicity|Antigen processing and presentation|Viral carcinogenesis|Autoimmune thyroid disease|Allograft rejection|Graft-versus-host disease|Viral myocarditis|Type I diabetes mellitus|HTLV-I infection|Herpes simplex infection|Kaposi's sarcoma-associated herpesvirus infection|Epstein-Barr virus …
TCONS_00022717	26.13969408	40.98728735	11.29210082	0.275502517	-1.859862597	0.03465206	1	Down	1.317364	0.4092365	0.4405313	0.3028639	0.0697983	0.1919274	Chr20	29645486	29681693	+	XLOC_009599	XM_006256419.3	0	sense	genic	exonic	containing	Spock2	GeneID:361840,Genbank:XM_006256419.3,RGD:1308568	sparc/osteonectin, cwcv and kazal-like domains proteoglycan (testican) 2, transcript variant X1	GO:0007165,GO:0010811,GO:0019800,GO:0030198,GO:0050840,GO:1990830,GO:0005509,GO:0005539,GO:0005578	signal transduction|positive regulation of cell-substrate adhesion|peptide cross-linking via chondroitin 4-sulfate glycosaminoglycan|extracellular matrix organization|extracellular matrix binding|cellular response to leukemia inhibitory factor|calcium ion binding|glycosaminoglycan binding|proteinaceous extracellular matrix
TCONS_00023117	1201.045707	681.5346245	1720.55679	2.524533205	1.336016653	0.046162807	1	Up	26.43445	26.92893	22.55625	34.16611	93.73699	55.42695	Chr20	4788670	4940259	-	XLOC_009747	XM_017601730.1	0	sense	genic	exonic	overlapping	RT1-CE3	GeneID:414793,Genbank:XM_017601730.1,RGD:1598231	RT1 class I, locus CE3, transcript variant X1	GO:0005886,GO:0016021	plasma membrane|integral component of membrane	rno04514,rno04144,rno04145,rno04218,rno04650,rno04612,rno05203,rno05320,rno05330,rno05332,rno05416,rno04940,rno05166,rno05168,rno05167,rno05169,rno05165	Cell adhesion molecules (CAMs)|Endocytosis|Phagosome|Cellular senescence|Natural killer cell mediated cytotoxicity|Antigen processing and presentation|Viral carcinogenesis|Autoimmune thyroid disease|Allograft rejection|Graft-versus-host disease|Viral myocarditis|Type I diabetes mellitus|HTLV-I infection|Herpes simplex infection|Kaposi's sarcoma-associated herpesvirus infection|Epstein-Barr virus …
TCONS_00023122	1431.890749	830.2110688	2033.570429	2.449461957	1.292464885	0.025212017	1	Up	56.84127	51.83975	87.03376	98.9685	185.6627	189.8129	Chr20	4788982	4940259	-	XLOC_009747	XM_017601733.1	0	sense	genic	intronic	containing	RT1-CE3	GeneID:414793,Genbank:XM_017601733.1,RGD:1598231	RT1 class I, locus CE3, transcript variant X4	GO:0005886,GO:0016021	plasma membrane|integral component of membrane	rno04514,rno04144,rno04145,rno04218,rno04650,rno04612,rno05203,rno05320,rno05330,rno05332,rno05416,rno04940,rno05166,rno05168,rno05167,rno05169,rno05165	Cell adhesion molecules (CAMs)|Endocytosis|Phagosome|Cellular senescence|Natural killer cell mediated cytotoxicity|Antigen processing and presentation|Viral carcinogenesis|Autoimmune thyroid disease|Allograft rejection|Graft-versus-host disease|Viral myocarditis|Type I diabetes mellitus|HTLV-I infection|Herpes simplex infection|Kaposi's sarcoma-associated herpesvirus infection|Epstein-Barr virus …
TCONS_00023367	46.57372582	24.77947888	68.36797277	2.759056117	1.4641748	0.047384805	1	Up	1.054543	0.3966749	0.03642397	0.9271837	1.23689	1.47807	Chr20	27283185	27285342	-	XLOC_009855	NM_001100860.1	0	sense	genic	exonic	overlapping	Slc25a16	GeneID:361836,Genbank:NM_001100860.1,RGD:1311311	solute carrier family 25 member 16	GO:0043504,GO:0016890,GO:0005634,GO:0045740,GO:0017108,GO:0005739,GO:0055085,GO:0022857,GO:0005743,GO:0080122,GO:0005760,GO:0006264,GO:0006284,GO:0032508,GO:0006839,GO:0090305,GO:0035349,GO:0015217,GO:0042645,GO:0015228,GO:0043137,GO:0015866,GO:0000076,GO:0043139,GO:0016021,GO:0000729,GO:0043142,GO:0003677	mitochondrial DNA repair|site-specific endodeoxyribonuclease activity, specific for altered base|nucleus|positive regulation of DNA replication|5'-flap endonuclease activity|mitochondrion|transmembrane transport|transmembrane transporter activity|mitochondrial inner membrane|AMP transmembrane transporter activity|gamma DNA polymerase complex|mitochondrial DNA replication|base-excision repair|DNA …
TCONS_00023863	735.5208637	1039.788441	431.2532866	0.414750991	-1.269682666	0.044070634	1	Down	26.11817	67.84284	37.43778	19.78728	21.46428	11.80046	Chr3	27964548	27965613	+	XLOC_010090	XM_017592325.1	0	sense	genic	intronic	nested	LOC102551194	GeneID:102551194,Genbank:XM_017592325.1,RGD:7539922	uncharacterized LOC102551194
TCONS_00023869	6.385171802	0	12.7703436	Inf	Inf	0.011803084	1	Up	3.28E-24	3.43E-06	1.26E-21	2.670931	5.33E-23	1.449227	Chr3	30396336	30427971	+
TCONS_00024750	9.812170602	0.320804989	19.30353622	60.17218217	5.911024773	0.017912256	1	Up	1.20E-08	0.1318102	0.00418307	2.67E-11	1.715385	3.555546	Chr3	148276875	148284138	+	XLOC_010418	XM_006235265.3	0	antisense	genic	intronic	nested	Bcl2l1	GeneID:24888,Genbank:XM_006235265.3,RGD:2200	Bcl2-like 1, transcript variant X5	GO:0097371,GO:0098793,GO:0098794,GO:1900118,GO:1900244,GO:1900452,GO:1902042,GO:1902230,GO:1903077,GO:0005739,GO:0005740,GO:0005741,GO:0005743,GO:0007281,GO:0005759,GO:0007283,GO:0005783,GO:0007568,GO:0005813,GO:0008134,GO:0008283,GO:0008284,GO:0008584,GO:0021987,GO:0008630,GO:0030054,GO:0030276,GO:0009314,GO:0030672,GO:0031965,GO:0031966,GO:0001541,GO:0042981,GO:0032465,GO:0001666,GO:0043027,GO:…	MDM2/MDM4 family protein binding|presynapse|postsynapse|negative regulation of execution phase of apoptosis|positive regulation of synaptic vesicle endocytosis|regulation of long term synaptic depression|negative regulation of extrinsic apoptotic signaling pathway via death domain receptors|negative regulation of intrinsic apoptotic signaling pathway in response to DNA damage|negative regulation …	rno04014,rno04630,rno04064,rno04151,rno04140,rno04137,rno04210,rno04215,rno04621,rno05200,rno05202,rno05212,rno05225,rno05220,rno05222,rno05014,rno05166,rno05145,rno01521,rno01524	Ras signaling pathway|Jak-STAT signaling pathway|NF-kappa B signaling pathway|PI3K-Akt signaling pathway|Autophagy - animal|Mitophagy - animal|Apoptosis|Apoptosis - multiple species|NOD-like receptor signaling pathway|Pathways in cancer|Transcriptional misregulation in cancers|Pancreatic cancer|Hepatocellular carcinoma|Chronic myeloid leukemia|Small cell lung cancer|Amyotrophic lateral sclerosis …
TCONS_00026162	47.63486933	75.42646317	19.84327548	0.263081081	-1.92642059	0.015683873	1	Down	3.376321	4.271317	6.677013	0.1839378	0.6215294	3.045605	Chr3	142441537	142454311	-	XLOC_011003	XM_006235139.2	54044	antisense	intergenic	downstream	convergent	Foxa2	GeneID:25099,Genbank:XM_006235139.2,RGD:2808	forkhead box A2, transcript variant X1	GO:0001708,GO:0003677,GO:0003690,GO:0003700,GO:0006357,GO:0003705,GO:0006366,GO:0005515,GO:0007219,GO:0007389,GO:0008134,GO:0008344,GO:0023019,GO:0030054,GO:0009653,GO:0030154,GO:0030193,GO:0030324,GO:0031018,GO:0032525,GO:0000432,GO:0045893,GO:0032868,GO:0000978,GO:0045944,GO:0033132,GO:0040019,GO:0000981,GO:0001077,GO:0045945,GO:0001205,GO:0046332,GO:0001228,GO:0048468,GO:0001701,GO:2000971,GO:…	cell fate specification|DNA binding|double-stranded DNA binding|DNA binding transcription factor activity|regulation of transcription by RNA polymerase II|transcription factor activity, RNA polymerase II distal enhancer sequence-specific binding|transcription by RNA polymerase II|protein binding|Notch signaling pathway|pattern specification process|transcription factor binding|adult locomotory be…	rno04213,rno04950	Longevity regulating pathway - multiple species|Maturity onset diabetes of the young
TCONS_00028465	65.52746597	93.59958007	37.45535187	0.400165811	-1.321330182	0.048010163	1	Down	7.379081	5.349059	5.957222	2.523201	1.392642	3.419188	Chr4	120407806	120414020	-	XLOC_011977	XM_006236865.2	0	antisense	genic	intronic	overlapping	Ruvbl1	GeneID:65137,Genbank:XM_006236865.2,RGD:68373	RuvB-like AAA ATPase 1, transcript variant X1	GO:0005634,GO:0005654,GO:0005829,GO:0006281,GO:0006310,GO:0006338,GO:0035267,GO:0006351,GO:0040008,GO:0006357,GO:0043140,GO:0010756,GO:0043141,GO:0043531,GO:0043967,GO:2000269,GO:0043968,GO:0045296,GO:0000492,GO:0000812,GO:0001094,GO:0003678,GO:0003713,GO:0004003,GO:0005524,GO:0016363,GO:0016573,GO:0016887,GO:0017025,GO:0031011,GO:0032508,GO:0051117,GO:0032991,GO:0051301,GO:0071339,GO:0090263,GO:…	nucleus|nucleoplasm|cytosol|DNA repair|DNA recombination|chromatin remodeling|NuA4 histone acetyltransferase complex|transcription, DNA-templated|regulation of growth|regulation of transcription by RNA polymerase II|ATP-dependent 3'-5' DNA helicase activity|positive regulation of plasminogen activation|ATP-dependent 5'-3' DNA helicase activity|ADP binding|histone H4 acetylation|regulation of fibr…	rno04310	Wnt signaling pathway
TCONS_00028595	17.45158676	3.430738819	31.47243469	9.173660939	3.197497586	0.000647518	0.870921945	Up	2.05E-11	0.1017197	0.2793419	1.545416	1.301475	0.8772441	Chr4	133717024	133764191	-	XLOC_012023	NM_001271251.1	0	sense	genic	exonic	overlapping	Pdzrn3	GeneID:312607,Genbank:NM_001271251.1,RGD:1305250	PDZ domain containing RING finger 3	GO:0030054,GO:0005654,GO:0031594,GO:0005737,GO:0005829,GO:0007528,GO:0061630,GO:0008270,GO:0016567,GO:0004842,GO:0005634	cell junction|nucleoplasm|neuromuscular junction|cytoplasm|cytosol|neuromuscular junction development|ubiquitin protein ligase activity|zinc ion binding|protein ubiquitination|ubiquitin-protein transferase activity|nucleus
TCONS_00030253	76.86674565	148.6096937	5.123797648	0.03447822	-4.858170913	0.006037882	1	Down	0.04901189	7.159185	4.963139	0.000347631	0.3195056	0.0822885	Chr5	845564	847036	-	XLOC_012776	XM_006237717.3	0	sense	genic	exonic	nested	LOC679565	GeneID:679565,Genbank:XM_006237717.3,RGD:1587118	similar to acyl-Coenzyme A binding domain containing 5
TCONS_00030701	9.288269069	1.699463057	16.87707508	9.930827865	3.31191399	0.008973766	1	Up	1.53E-13	0.09450321	0.1663841	1.38267	0.9318317	0.203702	Chr5	91133093	91135857	-	XLOC_012964	XM_017593918.1	1669	sense	intergenic	upstream	same_strand	LOC108351097	GeneID:108351097,Genbank:XM_017593918.1	serine/arginine repetitive matrix protein 1-like
TCONS_00031835	9.877312324	19.75462465	0	0	#NAME?	0.002642178	1	Down	1.04E-13	1.098595	0.8296204	1.61E-06	4.76E-08	5.92E-09	Chr6	49973411	49974741	+	XLOC_013449	NM_001025051.1	0	sense	genic	exonic	overlapping	Fam110c	GeneID:500638,Genbank:NM_001025051.1,RGD:1564713	family with sequence similarity 110, member C	GO:0060491,GO:0005874,GO:0005938,GO:0030335,GO:0043014,GO:0051897,GO:0000922,GO:0005634,GO:0005815	regulation of cell projection assembly|microtubule|cell cortex|positive regulation of cell migration|alpha-tubulin binding|positive regulation of protein kinase B signaling|spindle pole|nucleus|microtubule organizing center
TCONS_00032854	58.25550282	87.47556061	29.03544502	0.331926367	-1.591064859	0.027097651	1	Down	25.21665	11.06526	7.354909	5.773974	2.642697	5.179958	Chr6	76652656	76663656	-	XLOC_013888	NM_020083.3	0	sense	genic	intronic	overlapping	Ralgapa1	GeneID:56785,Genbank:NM_020083.3,RGD:620642	Ral GTPase activating protein catalytic alpha subunit 1	GO:0090630,GO:0005634,GO:0005737,GO:0006355,GO:0043547,GO:0046982,GO:0005096,GO:0051056	activation of GTPase activity|nucleus|cytoplasm|regulation of transcription, DNA-templated|positive regulation of GTPase activity|protein heterodimerization activity|GTPase activator activity|regulation of small GTPase mediated signal transduction
TCONS_00035038	28.29510209	45.4289871	11.16121708	0.24568492	-2.025118784	0.010699385	1	Down	3.114754	1.892632	3.010965	0.5881123	0.001082978	1.388888	Chr7	76058617	76059510	-	XLOC_014850	XM_006241552.2	0	antisense	genic	exonic	overlapping	Grhl2	GeneID:299979,Genbank:XM_006241552.2,RGD:1561191	grainyhead-like transcription factor 2, transcript variant X1	GO:0003700,GO:0005575,GO:0005634,GO:0005654,GO:0005911,GO:0034329,GO:0006357,GO:0035264,GO:0006366,GO:0042733,GO:0007155,GO:0043010,GO:0043565,GO:0044030,GO:0045617,GO:0045893,GO:0045944,GO:0001161,GO:0001228,GO:0001701,GO:0001843,GO:0003208,GO:0003382,GO:0003674,GO:0003682,GO:0007420,GO:0008150,GO:0008283,GO:0008544,GO:0010468,GO:0021915,GO:0048568,GO:0048701,GO:0030323,GO:0051973,GO:0031490,GO:…	DNA binding transcription factor activity|cellular_component|nucleus|nucleoplasm|cell-cell junction|cell junction assembly|regulation of transcription by RNA polymerase II|multicellular organism growth|transcription by RNA polymerase II|embryonic digit morphogenesis|cell adhesion|camera-type eye development|sequence-specific DNA binding|regulation of DNA methylation|negative regulation of keratin…
TCONS_00035040	9.620462214	0.705235387	18.53568904	26.2829821	4.71605707	0.005266607	1	Up	0.000254806	0.01156708	0.1007004	1.300064	2.150449	0.2822557	Chr7	76058623	76059511	-	XLOC_014850	XM_006241552.2	0	antisense	genic	exonic	nested	Grhl2	GeneID:299979,Genbank:XM_006241552.2,RGD:1561191	grainyhead-like transcription factor 2, transcript variant X1	GO:0003700,GO:0005575,GO:0005634,GO:0005654,GO:0005911,GO:0034329,GO:0006357,GO:0035264,GO:0006366,GO:0042733,GO:0007155,GO:0043010,GO:0043565,GO:0044030,GO:0045617,GO:0045893,GO:0045944,GO:0001161,GO:0001228,GO:0001701,GO:0001843,GO:0003208,GO:0003382,GO:0003674,GO:0003682,GO:0007420,GO:0008150,GO:0008283,GO:0008544,GO:0010468,GO:0021915,GO:0048568,GO:0048701,GO:0030323,GO:0051973,GO:0031490,GO:…	DNA binding transcription factor activity|cellular_component|nucleus|nucleoplasm|cell-cell junction|cell junction assembly|regulation of transcription by RNA polymerase II|multicellular organism growth|transcription by RNA polymerase II|embryonic digit morphogenesis|cell adhesion|camera-type eye development|sequence-specific DNA binding|regulation of DNA methylation|negative regulation of keratin…
TCONS_00036871	2.613127003	5.226254007	0	0	#NAME?	0.038039304	1	Down	0.1356053	0.7898615	0.3556381	3.90E-08	1.43E-05	0.000590577	Chr8	181063	182328	-
TCONS_00038399	40.84774597	81.69549194	0	0	#NAME?	9.65E-13	8.60E-09	Down	4.162165	2.762896	3.517285	8.21E-16	2.00E-17	4.28E-14	Chr9	81020377	81022014	+
XR_001835535.1	3.648801642	0.320804989	6.976798296	21.74778618	4.442796644	0.034882288	1	Up	0.002532484	0.03522279	3.62E-10	0.1364263	0.2555695	0.1286841	Chr1	13395718	13408538	+	LOC102549233	NM_001170534.2	0	sense	genic	intronic	nested	Mcc	GeneID:307449,Genbank:NM_001170534.2,RGD:1561988	mutated in colorectal cancers	GO:0005737,GO:0005829,GO:0005886,GO:0010633,GO:0045184,GO:0050680,GO:0090090,GO:0005509,GO:0005634,GO:0005654	cytoplasm|cytosol|plasma membrane|negative regulation of epithelial cell migration|establishment of protein localization|negative regulation of epithelial cell proliferation|negative regulation of canonical Wnt signaling pathway|calcium ion binding|nucleus|nucleoplasm
XR_001836575.1	51.49810767	76.90634327	26.08987206	0.339242135	-1.559612728	0.024661767	1	Down	0.4555033	0.1638003	0.1835255	0.08946754	0.1233093	0.0380324	Chr2	39286557	39314568	-	LOC102549347	NM_001277210.1	146	antisense	intergenic	upstream	divergent	Smim15	GeneID:100359861,Genbank:NM_001277210.1,RGD:2324600	small integral membrane protein 15, transcript variant 2	GO:0016021	integral component of membrane
XR_001836680.1	6.044299026	11.7776732	0.310924855	0.026399515	-5.243344786	0.006587599	1	Down	0.07310148	0.06983727	0.1941275	0.01085091	1.02E-17	0	Chr2	123227621	123235170	-	LOC108349997	XM_008760913.2	29509	antisense	intergenic	upstream	divergent	Exosc9	GeneID:294975,Genbank:XM_008760913.2,RGD:1307888	exosome component 9, transcript variant X1	GO:0071035,GO:0034473,GO:0005730,GO:0000178,GO:0071038,GO:0034475,GO:0071042,GO:0034476,GO:0005737,GO:0043928,GO:0000228,GO:0000467,GO:0000956,GO:0006396,GO:0001102,GO:0016075,GO:0004532,GO:0045944,GO:0017091,GO:0005634,GO:0071028,GO:0005654,GO:0000176,GO:0030307,GO:0034427,GO:0000177	nuclear polyadenylation-dependent rRNA catabolic process|U1 snRNA 3'-end processing|nucleolus|exosome (RNase complex)|nuclear polyadenylation-dependent tRNA catabolic process|U4 snRNA 3'-end processing|nuclear polyadenylation-dependent mRNA catabolic process|U5 snRNA 3'-end processing|cytoplasm|exonucleolytic nuclear-transcribed mRNA catabolic process involved in deadenylation-dependent decay|nuc…	rno03018	RNA degradation
XR_001836837.1	7.099032546	14.19806509	0	0	#NAME?	0.017017507	1	Down	0.3311272	0.1278808	9.44E-16	4.04E-06	5.56E-05	0	Chr2	204032153	204048727	+	LOC103691652	NM_012504.1	130	antisense	intergenic	upstream	divergent	Atp1a1	GeneID:24211,Genbank:NM_012504.1,RGD:2167	ATPase Na+/K+ transporting subunit alpha 1	GO:0005783,GO:0005794,GO:0005886,GO:0005890,GO:0005901,GO:0016020,GO:0006813,GO:0006814,GO:0016021,GO:0006883,GO:0016311,GO:0016323,GO:0016324,GO:0016791,GO:0036376,GO:0019901,GO:0042383,GO:0019904,GO:0030007,GO:0042493,GO:0043209,GO:0043531,GO:0043548,GO:0002026,GO:0090662,GO:0045121,GO:0002028,GO:1903416,GO:0045822,GO:0005391,GO:0045823,GO:1990239,GO:1990573,GO:0005515,GO:0005524,GO:0005768,GO:…	endoplasmic reticulum|Golgi apparatus|plasma membrane|sodium:potassium-exchanging ATPase complex|caveola|membrane|potassium ion transport|sodium ion transport|integral component of membrane|cellular sodium ion homeostasis|dephosphorylation|basolateral plasma membrane|apical plasma membrane|phosphatase activity|sodium ion export across plasma membrane|protein kinase binding|sarcolemma|protein doma…	rno04024,rno04022,rno04911,rno04918,rno04919,rno04925,rno04260,rno04261,rno04970,rno04971,rno04972,rno04976,rno04973,rno04974,rno04978,rno04960,rno04961,rno04964	cAMP signaling pathway|cGMP - PKG signaling pathway|Insulin secretion|Thyroid hormone synthesis|Thyroid hormone signaling pathway|Aldosterone synthesis and secretion|Cardiac muscle contraction|Adrenergic signaling in cardiomyocytes|Salivary secretion|Gastric acid secretion|Pancreatic secretion|Bile secretion|Carbohydrate digestion and absorption|Protein digestion and absorption|Mineral absorption…
XR_001837133.1	5.854542024	11.70908405	0	0	#NAME?	0.00078206	0.870921945	Down	0.5088155	0.4508071	0.1026634	1.71E-15	4.39E-05	0.001370081	Chr3	58073719	58084552	-	LOC102549016	NM_001107812.2	6	antisense	intergenic	upstream	divergent	Metap1d	GeneID:311748,Genbank:NM_001107812.2,RGD:1307413	methionyl aminopeptidase type 1D (mitochondrial)	GO:0046872,GO:0070006,GO:0070084,GO:0005739,GO:0006508,GO:0043231	metal ion binding|metalloaminopeptidase activity|protein initiator methionine removal|mitochondrion|proteolysis|intracellular membrane-bounded organelle
XR_001837541.1	2.946017504	5.892035008	0	0	#NAME?	0.023715293	1	Down	0.1850348	0.09749503	0.000668945	2.30E-06	0.002871251	1.27E-26	Chr4	44638421	44668178	-	LOC103692063	XM_006236130.3	8215	antisense	intergenic	downstream	convergent	Cav1	GeneID:25404,Genbank:XM_006236130.3,RGD:2280	caveolin 1, transcript variant X1	GO:0045907,GO:0046426,GO:0046785,GO:0046982,GO:0048365,GO:0051117,GO:0048471,GO:0051259,GO:0051260,GO:0051384,GO:0051480,GO:0061099,GO:0051592,GO:0070320,GO:0051899,GO:0070373,GO:0070382,GO:0070836,GO:0086091,GO:0086098,GO:0071260,GO:0016504,GO:0090090,GO:0019065,GO:0019217,GO:0001525,GO:0090263,GO:1901844,GO:0019899,GO:0001570,GO:0090398,GO:0019900,GO:1903361,GO:0097190,GO:0030674,GO:0019901,GO:…	positive regulation of vasoconstriction|negative regulation of JAK-STAT cascade|microtubule polymerization|protein heterodimerization activity|Rac GTPase binding|ATPase binding|perinuclear region of cytoplasm|protein complex oligomerization|protein homooligomerization|response to glucocorticoid|regulation of cytosolic calcium ion concentration|negative regulation of protein tyrosine kinase activi…	rno04144,rno04510,rno05205,rno05418,rno05416,rno05100	Endocytosis|Focal adhesion|Proteoglycans in cancer|Fluid shear stress and atherosclerosis|Viral myocarditis|Bacterial invasion of epithelial cells
XR_001837608.1	12.9776053	5.228317932	20.72689268	3.964352005	1.987085069	0.041452656	1	Up	2.32E-16	0.3902879	0.09520566	0.6693144	0.5464357	0.7034103	Chr4	97784263	97833267	+	LOC100912188	NM_024127.2	0	antisense	genic	exonic	overlapping	Gadd45a	GeneID:25112,Genbank:NM_024127.2,RGD:2654	growth arrest and DNA-damage-inducible, alpha	GO:0005737,GO:0006469,GO:0006974,GO:0007098,GO:0046982,GO:0016607,GO:0047485,GO:0019900,GO:0051726,GO:0071260,GO:0071479,GO:0071850,GO:0000086,GO:0000185,GO:0000979,GO:0005634,GO:0042770,GO:0042803,GO:0043065,GO:0046330,GO:1900745,GO:2000379	cytoplasm|negative regulation of protein kinase activity|cellular response to DNA damage stimulus|centrosome cycle|protein heterodimerization activity|nuclear speck|protein N-terminus binding|kinase binding|regulation of cell cycle|cellular response to mechanical stimulus|cellular response to ionizing radiation|mitotic cell cycle arrest|G2/M transition of mitotic cell cycle|activation of MAPKKK a…	rno04010,rno04068,rno04110,rno04210,rno04115,rno04218,rno05200,rno05202,rno05210,rno05212,rno05225,rno05226,rno05214,rno05216,rno05220,rno05217,rno05218,rno05213,rno05224,rno05222,rno05223	MAPK signaling pathway|FoxO signaling pathway|Cell cycle|Apoptosis|p53 signaling pathway|Cellular senescence|Pathways in cancer|Transcriptional misregulation in cancers|Colorectal cancer|Pancreatic cancer|Hepatocellular carcinoma|Gastric cancer|Glioma|Thyroid cancer|Chronic myeloid leukemia|Basal cell carcinoma|Melanoma|Endometrial cancer|Breast cancer|Small cell lung cancer|Non-small cell lung c…
XR_001837634.1	73.93709524	112.8107108	35.06347968	0.310816938	-1.68586297	0.013663673	1	Down	1.191763	1.27251	1.15232	0.8200436	0.2755774	1.35E-06	Chr4	120944213	120958941	-	LOC102555035	XM_017593019.1	81869	antisense	intergenic	upstream	divergent	Prr20e	GeneID:685621,Genbank:XM_017593019.1,RGD:1591392	proline rich 20E
XR_001837812.1	5.776096415	10.61941826	0.932774566	0.087836692	-3.509032475	0.043138687	1	Down	1.044936	0.9528556	1.02E-25	0.1349735	3.26E-07	3.47E-05	Chr4	180820015	180830184	-	LOC102553163	NM_031046.3	19927	sense	intergenic	upstream	same_strand	Itpr2	GeneID:81678,Genbank:NM_031046.3,RGD:69649	inositol 1,4,5-trisphosphate receptor, type 2	GO:0005634,GO:0005737,GO:0005783,GO:0005789,GO:0030659,GO:0030667,GO:0033017,GO:0005886,GO:0035091,GO:0043209,GO:0043235,GO:0048016,GO:0051209,GO:0001666,GO:0005220,GO:0005509,GO:0005515,GO:0005938,GO:0006816,GO:0015278,GO:0016020,GO:0016021,GO:0016529,GO:0070588,GO:0070679,GO:0030424,GO:0071320,GO:0071361,GO:0071456,GO:0097110	nucleus|cytoplasm|endoplasmic reticulum|endoplasmic reticulum membrane|cytoplasmic vesicle membrane|secretory granule membrane|sarcoplasmic reticulum membrane|plasma membrane|phosphatidylinositol binding|myelin sheath|receptor complex|inositol phosphate-mediated signaling|release of sequestered calcium ion into cytosol|response to hypoxia|inositol 1,4,5-trisphosphate-sensitive calcium-release cha…	rno04371,rno04020,rno04070,rno04022,rno04114,rno04210,rno04218,rno04540,rno04611,rno04621,rno04625,rno04922,rno04912,rno04915,rno04921,rno04918,rno04924,rno04925,rno04927,rno04270,rno04970,rno04971,rno04972,rno04724,rno04725,rno04728,rno04726,rno04720,rno04730,rno04723,rno04750,rno05205,rno05010,rno04934,rno05167	Apelin signaling pathway|Calcium signaling pathway|Phosphatidylinositol signaling system|cGMP - PKG signaling pathway|Oocyte meiosis|Apoptosis|Cellular senescence|Gap junction|Platelet activation|NOD-like receptor signaling pathway|C-type lectin receptor signaling pathway|Glucagon signaling pathway|GnRH signaling pathway|Estrogen signaling pathway|Oxytocin signaling pathway|Thyroid hormone synthe…
XR_001838235.1	10.82025553	18.73334409	2.907166984	0.155186761	-2.687922612	0.01311515	1	Down	0.126702	0.04753835	0.04153646	0.01566523	0.002735472	0.01083619	Chr6	6257393	6276006	-	LOC102553857	XM_017594401.1	570	sense	intergenic	upstream	same_strand	LOC102554045	GeneID:102554045,Genbank:XM_017594401.1,RGD:7752374	uncharacterized LOC102554045, transcript variant X1
XR_001840134.1	7.617977238	13.87086328	1.365091191	0.098414292	-3.344988345	0.010668894	1	Down	0.11023	0.03509376	0.1337197	0.002805029	0.01868315	0.007298959	Chr10	19718067	19749790	-	LOC108352070	XM_006246104.1	65153	sense	intergenic	upstream	same_strand	Spdl1	GeneID:303037,Genbank:XM_006246104.1,RGD:1306908	spindle apparatus coiled-coil protein 1, transcript variant X1	GO:0019899,GO:0000922,GO:0034501,GO:0000940,GO:0005634,GO:0043515,GO:0005737,GO:0005815,GO:0007080,GO:0000132,GO:0051301	enzyme binding|spindle pole|protein localization to kinetochore|condensed chromosome outer kinetochore|nucleus|kinetochore binding|cytoplasm|microtubule organizing center|mitotic metaphase plate congression|establishment of mitotic spindle orientation|cell division
XR_001840680.1	7.000362949	12.75702648	1.243699422	0.097491326	-3.358582331	0.01728006	1	Down	0.1294864	0.2276628	0.4300097	0.0802845	5.81E-05	4.21E-05	Chr12	40970847	40980813	+	LOC108352450	NM_013088.2	14848	sense	intergenic	downstream	same_strand	Ptpn11	GeneID:25622,Genbank:NM_013088.2,RGD:3447	protein tyrosine phosphatase, non-receptor type 11, transcript variant 2	GO:0005158,GO:0005515,GO:0005634,GO:0005737,GO:0005739,GO:0005829,GO:0030220,GO:0030971,GO:0006470,GO:0006629,GO:0031748,GO:0032528,GO:0032991,GO:0042445,GO:0042593,GO:0033277,GO:0043254,GO:0033628,GO:0043274,GO:0043560,GO:0045931,GO:0046676,GO:0000077,GO:0051428,GO:0046825,GO:0000187,GO:0051463,GO:0046887,GO:0004721,GO:0060020,GO:0046888,GO:0004725,GO:0060125,GO:0060325,GO:0004726,GO:0061582,GO:…	insulin receptor binding|protein binding|nucleus|cytoplasm|mitochondrion|cytosol|platelet formation|receptor tyrosine kinase binding|protein dephosphorylation|lipid metabolic process|D1 dopamine receptor binding|microvillus organization|protein-containing complex|hormone metabolic process|glucose homeostasis|abortive mitotic cell cycle|regulation of protein complex assembly|regulation of cell adh…	rno04014,rno04630,rno04072,rno04625,rno04650,rno04670,rno04920,rno04722,rno04360,rno05205,rno05220,rno05211,rno04931,rno05168	Ras signaling pathway|Jak-STAT signaling pathway|Phospholipase D signaling pathway|C-type lectin receptor signaling pathway|Natural killer cell mediated cytotoxicity|Leukocyte transendothelial migration|Adipocytokine signaling pathway|Neurotrophin signaling pathway|Axon guidance|Proteoglycans in cancer|Chronic myeloid leukemia|Renal cell carcinoma|Insulin resistance|Herpes simplex infection
XR_001841030.1	28.77775256	14.46907813	43.08642699	2.97782807	1.57426046	0.046552915	1	Up	0.1380497	0.2229034	0.000748042	0.3372384	0.212285	0.4586291	Chr14	2382141	2391137	-	LOC102556249	XM_017599143.1	10228	sense	intergenic	upstream	same_strand	Pde6b	GeneID:289878,Genbank:XM_017599143.1,RGD:1311039	phosphodiesterase 6B, transcript variant X1	GO:0007165,GO:0008150,GO:0009583,GO:0046037,GO:0046872,GO:0047555,GO:0051480,GO:0060041,GO:0001750,GO:0003674,GO:0005575	signal transduction|biological_process|detection of light stimulus|GMP metabolic process|metal ion binding|3',5'-cyclic-GMP phosphodiesterase activity|regulation of cytosolic calcium ion concentration|retina development in camera-type eye|photoreceptor outer segment|molecular_function|cellular_component	rno00230,rno04744	Purine metabolism|Phototransduction
XR_001841037.1	2.875250481	0	5.750500961	Inf	Inf	0.030398291	1	Up	1.31E-05	9.12E-05	1.99E-05	0.08335026	0.000913488	0.05000032	Chr14	2382141	2391141	-	LOC102556249	XM_017599143.1	10228	sense	intergenic	upstream	same_strand	Pde6b	GeneID:289878,Genbank:XM_017599143.1,RGD:1311039	phosphodiesterase 6B, transcript variant X1	GO:0007165,GO:0008150,GO:0009583,GO:0046037,GO:0046872,GO:0047555,GO:0051480,GO:0060041,GO:0001750,GO:0003674,GO:0005575	signal transduction|biological_process|detection of light stimulus|GMP metabolic process|metal ion binding|3',5'-cyclic-GMP phosphodiesterase activity|regulation of cytosolic calcium ion concentration|retina development in camera-type eye|photoreceptor outer segment|molecular_function|cellular_component	rno00230,rno04744	Purine metabolism|Phototransduction
XR_001841117.1	20.30978016	6.87490212	33.74465819	4.9083838	2.295248062	0.007571652	1	Up	0.9962328	1.670247	1.130217	7.580796	6.4306	3.844952	Chr14	33942844	33943180	+	LOC103693742	XM_017599449.1	15315	antisense	intergenic	downstream	convergent	LOC108348180	GeneID:108348180,Genbank:XM_017599449.1	signal recognition particle subunit SRP72-like	GO:0006614,GO:0008312,GO:0048500	SRP-dependent cotranslational protein targeting to membrane|7S RNA binding|signal recognition particle
XR_001841127.1	6.170993544	11.0088124	1.333174688	0.121100682	-3.045721107	0.032330434	1	Down	0.09851418	0.1163689	0.2030054	0.01387907	0.02914111	0.0154047	Chr14	43998383	44005019	+	LOC108352747	XM_017599462.1	0	antisense	genic	intronic	nested	N4bp2	GeneID:305342,Genbank:XM_017599462.1,RGD:1565738	NEDD4 binding protein 2, transcript variant X5	GO:0016310,GO:0046404,GO:0090305,GO:0004519,GO:0005524,GO:0005829	phosphorylation|ATP-dependent polydeoxyribonucleotide 5'-hydroxyl-kinase activity|nucleic acid phosphodiester bond hydrolysis|endonuclease activity|ATP binding|cytosol
XR_001841277.1	13.89092668	6.103363382	21.67848997	3.551892393	1.828587875	0.047015643	1	Up	0.1909478	0.000133558	0.4254338	0.8683258	0.727179	0.7082354	Chr15	5396606	5402233	-	LOC108352880	XM_017599829.1	10	sense	intergenic	upstream	same_strand	LOC102546376	GeneID:102546376,Genbank:XM_017599829.1,RGD:7671977	disks large homolog 5-like, transcript variant X2
XR_001841324.1	6.589312732	13.17862546	0	0	#NAME?	0.02332211	1	Down	0.1346359	0.6471886	0.08304215	4.45E-11	1.39E-06	1.37E-08	Chr15	30884114	30886030	+	LOC108352917
XR_001841360.1	10.70489666	19.72695774	1.68283558	0.085306391	-3.551202352	0.002111762	1	Down	0.3047004	0.06483996	0.1916953	0.000562295	1.29E-07	0.04667202	Chr15	46823641	46830840	+	LOC108348251	NM_001012042.1	0	sense	genic	intronic	nested	Xkr6	GeneID:305960,Genbank:NM_001012042.1,RGD:1310719	XK related 6	GO:0016020,GO:0016021	membrane|integral component of membrane
XR_001841605.1	35.7717139	19.02668609	52.5167417	2.760162303	1.464753103	0.038859668	1	Up	0.2475652	2.83E-14	0.3660548	0.7414989	0.303452	0.6925481	Chr16	18989102	18996761	+	LOC108348384	NM_001107300.2	4300	sense	intergenic	upstream	same_strand	Med26	GeneID:306328,Genbank:NM_001107300.2,RGD:1309524	mediator complex subunit 26	GO:0005575,GO:0006357,GO:0008150,GO:0016592,GO:0001104,GO:0003674	cellular_component|regulation of transcription by RNA polymerase II|biological_process|mediator complex|RNA polymerase II transcription cofactor activity|molecular_function
XR_001841671.1	7.376387481	1.616835408	13.13593955	8.124475432	3.022274666	0.021387624	1	Up	0.1635565	0.01667863	0.08271109	0.2750652	1.154702	0.6669408	Chr16	74181050	74182023	+	LOC108348421	NM_053355.2	0	sense	genic	intronic	nested	Ikbkb	GeneID:84351,Genbank:NM_053355.2,RGD:621375	inhibitor of kappa light polypeptide gene enhancer in B-cells, kinase beta	GO:0005634,GO:0005737,GO:0005829,GO:0006468,GO:0006954,GO:0010976,GO:0007249,GO:0018105,GO:0007252,GO:0008284,GO:0019901,GO:0030866,GO:0042803,GO:0031175,GO:0032496,GO:0043231,GO:0045087,GO:0045121,GO:0045944,GO:0001782,GO:0071356,GO:0003009,GO:0004672,GO:0072659,GO:0004674,GO:0097110,GO:0005515,GO:1901216,GO:0005524,GO:1903140,GO:1903347,GO:0008384,GO:0008385,GO:0009636,GO:0033209,GO:0009653,GO:…	nucleus|cytoplasm|cytosol|protein phosphorylation|inflammatory response|positive regulation of neuron projection development|I-kappaB kinase/NF-kappaB signaling|peptidyl-serine phosphorylation|I-kappaB phosphorylation|positive regulation of cell proliferation|protein kinase binding|cortical actin cytoskeleton organization|protein homodimerization activity|neuron projection development|response to…	rno04014,rno04010,rno04064,rno04668,rno04068,rno04151,rno04150,rno04210,rno04620,rno04621,rno04622,rno04623,rno04625,rno04660,rno04658,rno04659,rno04657,rno04662,rno04062,rno04910,rno04920,rno04722,rno04380,rno05200,rno05206,rno05212,rno05221,rno05220,rno05215,rno05222,rno05418,rno04930,rno04932,rno04931,rno05166,rno05164,rno05161,rno05160,rno05168,rno05167,rno05169,rno05165,rno05145,rno05142,rno…	Ras signaling pathway|MAPK signaling pathway|NF-kappa B signaling pathway|TNF signaling pathway|FoxO signaling pathway|PI3K-Akt signaling pathway|mTOR signaling pathway|Apoptosis|Toll-like receptor signaling pathway|NOD-like receptor signaling pathway|RIG-I-like receptor signaling pathway|Cytosolic DNA-sensing pathway|C-type lectin receptor signaling pathway|T cell receptor signaling pathway|Th1 …
XR_001841798.1	46.22539328	70.28220597	22.16858059	0.315422379	-1.664643074	0.019748763	1	Down	1.67442	1.479603	1.455174	0.5647488	4.49E-07	0.8839538	Chr17	12694239	12697724	-	LOC108348513	NM_012758.1	24671	sense	intergenic	upstream	same_strand	Syk	GeneID:25155,Genbank:NM_012758.1,RGD:3796	spleen associated tyrosine kinase	GO:0042101,GO:0042127,GO:0042169,GO:0002092,GO:0002250,GO:0042742,GO:0002281,GO:0045087,GO:0045401,GO:0043306,GO:0045425,GO:0004713,GO:0002283,GO:0045579,GO:0004715,GO:0046777,GO:0048514,GO:0045588,GO:0004716,GO:0006468,GO:0050715,GO:0006954,GO:0005102,GO:0007159,GO:0005178,GO:0050731,GO:0070372,GO:0050764,GO:0007166,GO:0071226,GO:0007167,GO:0000187,GO:0018108,GO:0007169,GO:0001525,GO:0007229,GO:…	T cell receptor complex|regulation of cell proliferation|SH2 domain binding|positive regulation of receptor internalization|adaptive immune response|defense response to bacterium|macrophage activation involved in immune response|innate immune response|positive regulation of interleukin-3 biosynthetic process|positive regulation of mast cell degranulation|positive regulation of granulocyte macroph…	rno04064,rno04072,rno04151,rno04611,rno04625,rno04650,rno04662,rno04664,rno04666,rno04380,rno05203,rno05152,rno05167,rno05169	NF-kappa B signaling pathway|Phospholipase D signaling pathway|PI3K-Akt signaling pathway|Platelet activation|C-type lectin receptor signaling pathway|Natural killer cell mediated cytotoxicity|B cell receptor signaling pathway|Fc epsilon RI signaling pathway|Fc gamma R-mediated phagocytosis|Osteoclast differentiation|Viral carcinogenesis|Tuberculosis|Kaposi's sarcoma-associated herpesvirus infect…
XR_001841828.1	47.63451225	19.92092088	75.34810362	3.782360468	1.919286862	0.036261271	1	Up	0.06860545	0.1323355	0.1511556	0.3300834	0.7335258	0.247172	Chr17	16747885	16790014	+	LOC102554492	NM_175582.1	52759	antisense	intergenic	upstream	divergent	Id4	GeneID:291023,Genbank:NM_175582.1,RGD:631428	inhibitor of DNA binding 4, HLH protein	GO:0005737,GO:0007405,GO:0007420,GO:0007623,GO:0008134,GO:0008283,GO:0045892,GO:0008284,GO:0045944,GO:0010628,GO:0046983,GO:0021766,GO:0048712,GO:0048715,GO:0051726,GO:0060512,GO:0060740,GO:0060741,GO:0061682,GO:0000082,GO:0000122,GO:0001085,GO:0001191,GO:0003700,GO:0005634,GO:0021895,GO:0022010,GO:0030182,GO:0034613,GO:0043392,GO:0045444,GO:0045599,GO:0045665,GO:0045669	cytoplasm|neuroblast proliferation|brain development|circadian rhythm|transcription factor binding|cell proliferation|negative regulation of transcription, DNA-templated|positive regulation of cell proliferation|positive regulation of transcription by RNA polymerase II|positive regulation of gene expression|protein dimerization activity|hippocampus development|negative regulation of astrocyte dif…	rno04350,rno04550	TGF-beta signaling pathway|Signaling pathways regulating pluripotency of stem cells
XR_001841876.1	3.27529165	6.550583299	0	0	#NAME?	0.015115046	1	Down	0.7067511	0.6430829	2.22E-05	0.000314215	4.86E-07	3.66E-08	Chr17	22982825	22984982	-	LOC103694059	XM_006253786.3	0	antisense	genic	exonic	overlapping	Nedd9	GeneID:291044,Genbank:XM_006253786.3,RGD:1306276	neural precursor cell expressed, developmentally down-regulated 9, transcript variant X1	GO:0005654,GO:0005737,GO:0005829,GO:0005886,GO:0007169,GO:0016477,GO:0090527,GO:0000922,GO:0005634	nucleoplasm|cytoplasm|cytosol|plasma membrane|transmembrane receptor protein tyrosine kinase signaling pathway|cell migration|actin filament reorganization|spindle pole|nucleus
XR_001842145.1	24.29470449	39.86021316	8.729195833	0.218995212	-2.191028767	0.006505479	1	Down	0.8937021	1.04296	0.306924	0.08208335	0.2966675	0.07739415	Chr18	75471947	75479307	+	LOC102553626	XM_008772236.2	39501	antisense	intergenic	upstream	divergent	Setbp1	GeneID:291423,Genbank:XM_008772236.2,RGD:1306229	SET binding protein 1	GO:0005829,GO:0008150,GO:0016604,GO:0003674,GO:0005575,GO:0005634	cytosol|biological_process|nuclear body|molecular_function|cellular_component|nucleus
XR_001842737.1	8.522756373	14.77956349	2.265949255	0.153316386	-2.705416203	0.022213943	1	Down	0.1076489	0.05859752	0.01721735	0.01257674	0.00623655	0.003390987	ChrX	80441025	80467510	+	LOC102554698	NM_001109439.1	77857	sense	intergenic	downstream	same_strand	LOC681325	GeneID:681325,Genbank:NM_001109439.1,RGD:1596765	hypothetical protein LOC681325
XR_001842809.1	17.6000997	28.75577554	6.444423852	0.224108852	-2.157728459	0.022913702	1	Down	0.4306423	0.1663978	0.1070011	0.006545583	0.08628255	0.04574804	ChrX	137700764	137749030	-	LOC103690083	XM_008773581.2	89911	antisense	intergenic	upstream	divergent	LOC103690902	GeneID:103690902,Genbank:XM_008773581.2,RGD:9324676	high mobility group protein B4-like
XR_353646.3	13.75826988	21.96184612	5.554693633	0.252924713	-1.983220085	0.039437099	1	Down	0.3787845	0.2960102	0.2402655	0.09227496	0.03244868	0.1176109	Chr4	162388917	162394856	-	LOC102549299	XM_006237453.3	0	antisense	genic	exonic	overlapping	Clec2dl1	GeneID:689790,Genbank:XM_006237453.3,RGD:1588698	C-type lectin domain family 2 member D-like 1, transcript variant X1	GO:0005886,GO:0016021,GO:0030246	plasma membrane|integral component of membrane|carbohydrate binding
XR_353861.3	2.615064855	0	5.230129711	Inf	Inf	0.036336743	1	Up	2.74E-05	8.40E-05	0.004667927	0.06882643	0.07488457	7.63E-07	Chr5	21705806	21716612	+	LOC102551372	XM_017593615.1	9085	sense	intergenic	downstream	same_strand	Rab2a	GeneID:65158,Genbank:XM_017593615.1,RGD:68323	RAB2A, member RAS oncogene family, transcript variant X1	GO:0032482,GO:0007030,GO:0003924,GO:0033116,GO:0042470,GO:0012505,GO:0043025,GO:0005525,GO:0015031,GO:0005789,GO:0048471,GO:0016020,GO:0005794,GO:0019003,GO:0000139,GO:0006886,GO:0006888	Rab protein signal transduction|Golgi organization|GTPase activity|endoplasmic reticulum-Golgi intermediate compartment membrane|melanosome|endomembrane system|neuronal cell body|GTP binding|protein transport|endoplasmic reticulum membrane|perinuclear region of cytoplasm|membrane|Golgi apparatus|GDP binding|Golgi membrane|intracellular protein transport|ER to Golgi vesicle-mediated transport	rno04152	AMPK signaling pathway
XR_354700.2	5.234898554	0.656484367	9.813312741	14.94828092	3.901907676	0.016661922	1	Up	0.1473602	0	0.1355129	1.343721	1.233845	0.4378682	Chr6	42867577	42872756	-	LOC102551312	XM_017594030.1	8435	antisense	intergenic	downstream	convergent	Odc1	GeneID:24609,Genbank:XM_017594030.1,RGD:3227	ornithine decarboxylase 1, transcript variant X1	GO:0033387,GO:0004586,GO:0005737,GO:0005829,GO:0006595,GO:0042176,GO:0006596,GO:0042803,GO:0008284,GO:0001822,GO:0009446,GO:0003824,GO:0048471,GO:0009615	putrescine biosynthetic process from ornithine|ornithine decarboxylase activity|cytoplasm|cytosol|polyamine metabolic process|regulation of protein catabolic process|polyamine biosynthetic process|protein homodimerization activity|positive regulation of cell proliferation|kidney development|putrescine biosynthetic process|catalytic activity|perinuclear region of cytoplasm|response to virus	rno00330,rno00480	Arginine and proline metabolism|Glutathione metabolism
XR_355877.3	2.96131598	0	5.922631961	Inf	Inf	0.02362473	1	Up	0	4.15E-25	0	0.2070109	0.2152102	0.1203562	Chr7	125796141	125798930	+	LOC102550959	XM_017594772.1	0	antisense	genic	exonic	overlapping	Arhgap8	GeneID:300115,Genbank:XM_017594772.1,RGD:1303143	Rho GTPase activating protein 8, transcript variant X1	GO:0043087,GO:0043547,GO:0070374,GO:0005096,GO:0005737,GO:0007165	regulation of GTPase activity|positive regulation of GTPase activity|positive regulation of ERK1 and ERK2 cascade|GTPase activator activity|cytoplasm|signal transduction
XR_358814.3	6.118021542	10.94105914	1.294983943	0.118360017	-3.07874629	0.032782154	1	Down	0.0618132	0.02643208	0.08801046	0.01238235	5.34E-36	0.01367847	Chr13	13311809	13331500	-	LOC100911239
XR_361960.2	2.885905926	5.771811853	0	0	#NAME?	0.028863839	1	Down	1.73E-07	0.1771118	0.2404155	7.93E-23	3.69E-19	0.000280408	Chr19	59664944	59666742	-	LOC102547637	NM_001014271.1	0	sense	genic	intronic	nested	LOC367515	GeneID:367515,Genbank:NM_001014271.1,RGD:1359286	similar to RIKEN cDNA 1700081O22
XR_590884.2	8.333612417	16.66722483	0	0	#NAME?	0.003153815	1	Down	0.1657085	1.36E-14	0.1368659	2.91E-11	6.54E-14	6.89E-13	Chr2	39298145	39314653	-	LOC102549347	NM_001277210.1	61	antisense	intergenic	upstream	divergent	Smim15	GeneID:100359861,Genbank:NM_001277210.1,RGD:2324600	small integral membrane protein 15, transcript variant 2	GO:0016021	integral component of membrane
XR_591165.2	7.484014178	13.60293716	1.365091191	0.100352679	-3.316848959	0.011962753	1	Down	0.2159807	0.1748022	0.3489287	1.49E-14	0.05285753	0.02525949	Chr2	183811542	183860497	+	LOC102551266	XM_006232553.3	164	antisense	intergenic	upstream	divergent	LOC102551095	GeneID:102551095,Genbank:XM_006232553.3,RGD:7611669	uncharacterized LOC102551095
XR_591268.2	3.366388456	6.732776911	0	0	#NAME?	0.029819102	1	Down	0.06048451	0.2177442	0.02829377	1.45E-21	1.13E-36	1.24E-27	Chr2	208282762	208288376	+	LOC102548822	XM_006233067.3	48533	sense	intergenic	upstream	same_strand	Adora3	GeneID:25370,Genbank:XM_006233067.3,RGD:2051	adenosine A3 receptor, transcript variant X2	GO:0032088,GO:0001973,GO:0042629,GO:0042734,GO:0002553,GO:0002687,GO:0005886,GO:0005887,GO:0043306,GO:0007186,GO:0050729,GO:0008285,GO:0050850,GO:0014061,GO:0070257,GO:0014068,GO:0001609,GO:0016021,GO:0030336	negative regulation of NF-kappaB transcription factor activity|adenosine receptor signaling pathway|mast cell granule|presynaptic membrane|histamine secretion by mast cell|positive regulation of leukocyte migration|plasma membrane|integral component of plasma membrane|positive regulation of mast cell degranulation|G-protein coupled receptor signaling pathway|positive regulation of inflammatory re…	rno04071,rno04022,rno04080	Sphingolipid signaling pathway|cGMP - PKG signaling pathway|Neuroactive ligand-receptor interaction
XR_591531.2	7.063866384	1.410470773	12.71726199	9.016324363	3.172539418	0.015609906	1	Up	2.02E-19	0.000943237	0.1171228	0.1815933	0.3755286	0.5881107	Chr3	58073719	58084550	-	LOC102549016	NM_001107812.2	8	antisense	intergenic	upstream	divergent	Metap1d	GeneID:311748,Genbank:NM_001107812.2,RGD:1307413	methionyl aminopeptidase type 1D (mitochondrial)	GO:0046872,GO:0070006,GO:0070084,GO:0005739,GO:0006508,GO:0043231	metal ion binding|metalloaminopeptidase activity|protein initiator methionine removal|mitochondrion|proteolysis|intracellular membrane-bounded organelle
XR_591643.2	27.53878053	11.99746231	43.08009874	3.590767581	1.844292275	0.018207306	1	Up	0.1894533	0.1119601	0.140426	0.715551	0.5853194	0.199164	Chr3	114310468	114354370	+	LOC102557338	NM_031664.1	633	sense	intergenic	upstream	same_strand	Slc28a2	GeneID:60423,Genbank:NM_031664.1,RGD:61840	solute carrier family 28 member 2	GO:0005415,GO:0005887,GO:0015211,GO:0015860,GO:0034394,GO:1901642,GO:0001895,GO:0005337	nucleoside:sodium symporter activity|integral component of plasma membrane|purine nucleoside transmembrane transporter activity|purine nucleoside transmembrane transport|protein localization to cell surface|nucleoside transmembrane transport|retina homeostasis|nucleoside transmembrane transporter activity
XR_592671.1	2.517381881	5.034763762	0	0	#NAME?	0.04492847	1	Down	0	1.615582	1.429612	0	0	0	Chr5	125369293	125373517	+	LOC103692432
XR_592901.2	53.23436731	23.73956916	82.72916547	3.484863812	1.801102277	0.013221728	1	Up	0.00142158	2.048769	2.69E-05	2.568633	1.746213	2.655845	Chr6	24064737	24069291	+	LOC102553396	NM_001035221.1	60	sense	intergenic	upstream	same_strand	Ypel5	GeneID:298792,Genbank:NM_001035221.1,RGD:1309657	yippee-like 5	GO:0046872	metal ion binding
XR_593492.2	9.077255523	16.47222076	1.682290289	0.102128931	-3.291536492	0.046928868	1	Down	1.928527	3.87E-14	1.119494	0.08308429	0.2483191	1.26E-07	Chr7	75744800	75745685	+	LOC100910524	NM_001126087.1	57625	antisense	intergenic	downstream	convergent	Zfp706	GeneID:500855,Genbank:NM_001126087.1,RGD:1563959	zinc finger protein 706	GO:0005737,GO:0008150,GO:0045892,GO:1902455,GO:0003674,GO:0005575,GO:0005634	cytoplasm|biological_process|negative regulation of transcription, DNA-templated|negative regulation of stem cell population maintenance|molecular_function|cellular_component|nucleus
XR_593567.2	19.67265227	6.612144784	32.73315975	4.950460225	2.307562653	0.010104622	1	Up	0.08687303	0.03010128	0.01837015	0.1298054	0.3098671	0.1720668	Chr7	102701174	102871316	+	Pvt1
XR_593572.2	3.959680617	7.608436379	0.310924855	0.040865802	-4.612962138	0.024004381	1	Down	0.09267237	0.08454809	0.02464018	0.005204797	6.83E-07	2.26E-05	Chr7	102648442	102871316	+	Pvt1	NM_012603.2	57202	sense	intergenic	downstream	same_strand	Myc	GeneID:24577,Genbank:NM_012603.2,RGD:3130	myelocytomatosis oncogene	GO:0043066,GO:0043085,GO:0043279,GO:0043280,GO:0000987,GO:0001077,GO:0043388,GO:0001541,GO:0043473,GO:0001658,GO:0045787,GO:0043565,GO:0045821,GO:0044195,GO:0001701,GO:0045893,GO:0044330,GO:0001783,GO:0005634,GO:0002053,GO:0045944,GO:0002082,GO:0050910,GO:0046325,GO:0005635,GO:0051276,GO:0046722,GO:0005654,GO:0046982,GO:0051782,GO:0006352,GO:0006355,GO:0005719,GO:0051973,GO:0005730,GO:0060070,GO:…	negative regulation of apoptotic process|positive regulation of catalytic activity|response to alkaloid|positive regulation of cysteine-type endopeptidase activity involved in apoptotic process|proximal promoter sequence-specific DNA binding|transcriptional activator activity, RNA polymerase II proximal promoter sequence-specific DNA binding|positive regulation of DNA binding|ovarian follicle dev…	rno04010,rno04012,rno04310,rno04350,rno04390,rno04630,rno04151,rno04110,rno04218,rno04550,rno04919,rno05200,rno05230,rno05202,rno05206,rno05205,rno05210,rno05225,rno05226,rno05216,rno05221,rno05220,rno05219,rno05213,rno05224,rno05222,rno05166,rno05161,rno05167,rno05169	MAPK signaling pathway|ErbB signaling pathway|Wnt signaling pathway|TGF-beta signaling pathway|Hippo signaling pathway|Jak-STAT signaling pathway|PI3K-Akt signaling pathway|Cell cycle|Cellular senescence|Signaling pathways regulating pluripotency of stem cells|Thyroid hormone signaling pathway|Pathways in cancer|Central carbon metabolism in cancer|Transcriptional misregulation in cancers|MicroRNA…
XR_593712.2	31.23166451	46.45355963	16.00976939	0.344640314	-1.536836624	0.046907815	1	Down	0.3505975	1.200324	0.7850061	0.3218136	0.1452582	0.3212453	Chr7	139253870	139259130	+	LOC102548155	XM_008765778.2	0	antisense	genic	exonic	overlapping	Rapgef3	GeneID:59326,Genbank:XM_008765778.2,RGD:621869	Rap guanine nucleotide exchange factor 3, transcript variant X1	GO:0005902,GO:0007264,GO:0007420,GO:0009925,GO:0010667,GO:0014911,GO:0017034,GO:0032486,GO:0019904,GO:0032966,GO:0021510,GO:0033138,GO:0034242,GO:0035094,GO:0035690,GO:0051496,GO:0043025,GO:0060143,GO:0043547,GO:0060840,GO:0061028,GO:0071320,GO:0001525,GO:1990796,GO:0071407,GO:0001934,GO:2000249,GO:0071560,GO:0005085,GO:0071944,GO:2000251,GO:0005515,GO:2000615,GO:0005622,GO:0005886,GO:0030027,GO:…	microvillus|small GTPase mediated signal transduction|brain development|basal plasma membrane|negative regulation of cardiac muscle cell apoptotic process|positive regulation of smooth muscle cell migration|Rap guanyl-nucleotide exchange factor activity|Rap protein signal transduction|protein domain specific binding|negative regulation of collagen biosynthetic process|spinal cord development|posi…	rno04015,rno04072,rno04024,rno04670,rno04261,rno04726,rno04720	Rap1 signaling pathway|Phospholipase D signaling pathway|cAMP signaling pathway|Leukocyte transendothelial migration|Adrenergic signaling in cardiomyocytes|Serotonergic synapse|Long-term potentiation
XR_595008.2	10.75804521	17.45218806	4.063902361	0.232859189	-2.102470279	0.039508518	1	Down	0.2909574	0.1045261	0.08802789	1.22E-20	0.03787523	0.0703904	Chr11	32373687	32379615	-	LOC102548079	XM_017598216.1	48927	sense	intergenic	upstream	same_strand	LOC103693540	GeneID:103693540,Genbank:XM_017598216.1,RGD:9394128	uncharacterized LOC103693540
XR_595769.2	20.30978016	6.87490212	33.74465819	4.9083838	2.295248062	0.007571652	1	Up	0.9962328	1.670247	1.130217	7.580796	6.4306	3.844952	Chr14	33949017	33949353	+	LOC103693743	XM_017599449.1	9142	antisense	intergenic	downstream	convergent	LOC108348180	GeneID:108348180,Genbank:XM_017599449.1	signal recognition particle subunit SRP72-like	GO:0006614,GO:0008312,GO:0048500	SRP-dependent cotranslational protein targeting to membrane|7S RNA binding|signal recognition particle
XR_596257.2	50.71582614	23.92077455	77.51087773	3.240316386	1.696134685	0.012608532	1	Up	0.09297877	0.0468086	0.2329071	0.323887	0.3316804	0.595172	Chr15	87065820	87090951	-	LOC102556284
XR_596261.2	65.37396803	37.22003214	93.52790392	2.512837806	1.329317554	0.039888542	1	Up	0.07742716	0.265957	0.2494595	0.6116957	0.5935659	0.2849624	Chr15	87065820	87090952	-	LOC102556284
XR_596424.2	14.81347195	23.6011976	6.025746293	0.255315277	-1.969648232	0.035127893	1	Down	0.3448403	0.377112	0.4190482	0.03663995	0.04323477	0.2194454	Chr16	23208996	23217770	-	LOC102551750	XM_006253039.3	0	antisense	genic	intronic	overlapping	Psd3	GeneID:306380,Genbank:XM_006253039.3,RGD:1559968	pleckstrin and Sec7 domain containing 3, transcript variant X1	GO:0032012,GO:0032154,GO:0032587,GO:0005086,GO:0005543,GO:0016020	regulation of ARF protein signal transduction|cleavage furrow|ruffle membrane|ARF guanyl-nucleotide exchange factor activity|phospholipid binding|membrane	rno04144	Endocytosis
XR_596662.1	9.177819301	16.10223783	2.25340077	0.139943329	-2.837085377	0.01585289	1	Down	0.3725204	0.4510325	0.2136546	0.07931663	0.003677382	0.06522492	Chr17	19719204	19827560	-	LOC102549787	NM_001107344.2	15523	sense	intergenic	upstream	same_strand	Mylip	GeneID:306825,Genbank:NM_001107344.2,RGD:1305761	myosin regulatory light chain interacting protein	GO:0016567,GO:0005622,GO:0031032,GO:0005737,GO:0005856,GO:0005886,GO:0006511,GO:0031648,GO:0007399,GO:0032803,GO:0008092,GO:0042632,GO:0010977,GO:0045732,GO:0004842,GO:0046872,GO:0010989,GO:0061630,GO:0005200	protein ubiquitination|intracellular|actomyosin structure organization|cytoplasm|cytoskeleton|plasma membrane|ubiquitin-dependent protein catabolic process|protein destabilization|nervous system development|regulation of low-density lipoprotein particle receptor catabolic process|cytoskeletal protein binding|cholesterol homeostasis|negative regulation of neuron projection development|positive reg…	rno04979	Cholesterol metabolism
XR_596712.1	32.66531896	48.78079921	16.54983872	0.339269528	-1.559496237	0.038439564	1	Down	0.444678	0.7453947	0.5664265	0.1809818	0.2426787	0.1652823	Chr17	27732538	27738820	+	LOC102546544	XM_006253814.3	13660	antisense	intergenic	upstream	divergent	Rreb1	GeneID:306873,Genbank:XM_006253814.3,RGD:1310904	ras responsive element binding protein 1, transcript variant X3	GO:0016607,GO:0001228,GO:0033601,GO:0001650,GO:0043565,GO:0003700,GO:0005634,GO:0006355,GO:0044212,GO:0006366,GO:0045892,GO:0045944,GO:0007165,GO:1900026,GO:0007275,GO:0000122,GO:1903691,GO:0010634,GO:0000977,GO:2000394,GO:0000979	nuclear speck|transcriptional activator activity, RNA polymerase II transcription regulatory region sequence-specific DNA binding|positive regulation of mammary gland epithelial cell proliferation|fibrillar center|sequence-specific DNA binding|DNA binding transcription factor activity|nucleus|regulation of transcription, DNA-templated|transcription regulatory region DNA binding|transcription by R…
XR_597436.2	8.240787138	0.656484367	15.82508991	24.10581379	4.591309229	0.014654302	1	Up	0.01340274	2.88E-21	0.008639828	0.2669757	2.85E-05	0.2620645	Chr20	42750541	42759448	-	LOC102555751
