# Supplementary material for: Comprehensive Analysis of the Profiles of Differentially Expressed mRNAs, lncRNAs, and circRNAs in Phosgene-Induced Acute Lung Injury
Source: Biomed Res Int. 2021 Jan 9;2021:6278526. doi: 10.1155/2021/6278526 (PMC7811572; doi:10.1155/2021/6278526)
Supplement: Supplementary 9 — Table S9: differentially expressed circRNAs between the A and C group. [file 6278526.f9.txt]

Table S9 Differentially expressed circRNAs between A and C group
circRNA_id	BaseMean	BaseMean_control_A	BaseMean_case_C	FoldChange	log2FoldChange	pValue	qValue	Regulation	Expression_A1	Expression_A2	Expression_A3	Expression_C1	Expression_C2	Expression_C3	circRNA_Chr	circRNA_Strand	circRNA_Start	circRNA_End	genomic_length	circRNA_length	Type	best.transcript	transcript_position	gene	Dbxref	product	GO_id	GO_term	pathway	pathway_description
circRNA_0484|Chr1:200648164_200671090_-	1.676982752	0	3.353965505	Inf	Inf	0.047234037	0.977101241	Up	0	0	0	0.040671737	0.021205773	0.044128432	Chr1	-	200648164	200671090	22927	372	sense-overlapping	XM_008759861.2	Chr1:200590951_200677146_-	Fgfr2	GeneID:25022,Genbank:XM_008759861.2,RGD:2611	fibroblast growth factor receptor 2, transcript variant X4	GO:0048701,GO:0048730,GO:0048755,GO:0048762,GO:0050673,GO:0050678,GO:0050679,GO:0060449,GO:0050680,GO:0060463,GO:0051150,GO:0060484,GO:0051781,GO:0060501,GO:0060512,GO:0060523,GO:0060527,GO:0070372,GO:0060529,GO:0070374,GO:0060595,GO:0060601,GO:0071300,GO:0071560,GO:0090263,GO:0003416,GO:0004709,GO:0004713,GO:0004714,GO:0004871,GO:0004888,GO:0005007,GO:0005938,GO:0007267,GO:0007275,GO:0007409,GO:…	embryonic cranial skeleton morphogenesis|epidermis morphogenesis|branching morphogenesis of a nerve|mesenchymal cell differentiation|epithelial cell proliferation|regulation of epithelial cell proliferation|positive regulation of epithelial cell proliferation|bud elongation involved in lung branching|negative regulation of epithelial cell proliferation|lung lobe morphogenesis|regulation of smooth…	rno04014,rno04015,rno04010,rno04151,rno04144,rno04550,rno04810,rno05200,rno05230,rno05226,rno05215,rno01521	Ras signaling pathway|Rap1 signaling pathway|MAPK signaling pathway|PI3K-Akt signaling pathway|Endocytosis|Signaling pathways regulating pluripotency of stem cells|Regulation of actin cytoskeleton|Pathways in cancer|Central carbon metabolism in cancer|Gastric cancer|Prostate cancer|EGFR tyrosine kinase inhibitor resistance
circRNA_0501|Chr1:203343400_203385990_+	5.690548899	10.00946949	1.371628306	0.137033067	-2.867404025	0.002550166	0.977101241	Down	0.16159538	0.085846755	0.087909317	0	0	0.044128432	Chr1	+	203343400	203385990	42591	7178	sense-overlapping	XM_017590238.1	Chr1:203260622_203381994_+	LOC100911413	GeneID:100911413,Genbank:XM_017590238.1,RGD:6493252	deleted in malignant brain tumors 1 protein-like, transcript variant X1
circRNA_0780|Chr1:278698312_278731755_+	6.178272775	10.0162645	2.340281048	0.233648088	-2.097590864	0.015950074	0.977101241	Down	0.086184203	0.07511591	0.175818635	0.030503803	0.021205773	0.022064216	Chr1	+	278698312	278731755	33444	394	sense-overlapping	XM_008760587.2	Chr1:278546113_279098977_+	Atrnl1	GeneID:307992,Genbank:XM_008760587.2,RGD:1563485	attractin like 1, transcript variant X1	GO:0008150,GO:0003674,GO:0005575,GO:0007186	biological_process|molecular_function|cellular_component|G-protein coupled receptor signaling pathway
circRNA_0846|Chr10:15577563_15589574_-	64.19578292	0	128.3915658	Inf	Inf	0.002432128	0.977101241	Up	0	0	0	1.006625487	3.032425471	0	Chr10	-	15577563	15589574	12012	11897	sense-overlapping	NM_001013853.1	Chr10:15577249_15577977_-	Hba-a1	GeneID:287167,Genbank:NM_001013853.1,RGD:1359209	hemoglobin alpha, adult chain 1	GO:0015671,GO:0019825,GO:0020037,GO:0043177,GO:0051291,GO:0005344,GO:0005506,GO:0005833	oxygen transport|oxygen binding|heme binding|organic acid binding|protein heterooligomerization|oxygen carrier activity|iron ion binding|hemoglobin complex	rno05144,rno05143	Malaria|African trypanosomiasis
circRNA_2371|Chr15:85962566_85975367_-	1.67694345	0	3.353886901	Inf	Inf	0.047236475	0.977101241	Up	0	0	0	0.050839671	0	0.05516054	Chr15	-	85962566	85975367	12802	625	sense-overlapping	XM_017599918.1	Chr15:85927978_86105829_-	Tbc1d4	GeneID:306117,Genbank:XM_017599918.1,RGD:1561609	TBC1 domain family, member 4, transcript variant X1	GO:0005622,GO:0005829,GO:0006886,GO:0012505,GO:0016192,GO:0017137,GO:0031339,GO:0031982,GO:0032869,GO:0005096,GO:0043547,GO:0090630,GO:0005515	intracellular|cytosol|intracellular protein transport|endomembrane system|vesicle-mediated transport|Rab GTPase binding|negative regulation of vesicle fusion|vesicle|cellular response to insulin stimulus|GTPase activator activity|positive regulation of GTPase activity|activation of GTPase activity|protein binding	rno04919,rno04931	Thyroid hormone signaling pathway|Insulin resistance
circRNA_2416|Chr16:3068022_3072642_+	1.940209947	3.880419894	0	0	#NAME?	0.025293571	0.977101241	Down	0.032319076	0.032192533	0.065931988	0	0	0	Chr16	+	3068022	3072642	4621	468	sense-overlapping	XM_017600275.1	Chr16:3050506_3105575_+	Fam208a	GeneID:680155,Genbank:XM_017600275.1,RGD:1595469	family with sequence similarity 208, member A, transcript variant X5	GO:0005654	nucleoplasm
circRNA_2472|Chr16:23555919_23573530_+	1.774449006	3.548898012	0	0	#NAME?	0.03849509	0.977101241	Down	0.032319076	0.021461689	0.065931988	0	0	0	Chr16	+	23555919	23573530	17612	460	sense-overlapping	XM_006253039.3	Chr16:23212165_23789414_+	Psd3	GeneID:306380,Genbank:XM_006253039.3,RGD:1559968	pleckstrin and Sec7 domain containing 3, transcript variant X1	GO:0032012,GO:0032154,GO:0032587,GO:0005086,GO:0005543,GO:0016020	regulation of ARF protein signal transduction|cleavage furrow|ruffle membrane|ARF guanyl-nucleotide exchange factor activity|phospholipid binding|membrane	rno04144	Endocytosis
circRNA_2663|Chr17:24052253_24058139_-	2.737821031	5.475642063	0	0	#NAME?	0.003255432	0.977101241	Down	0.086184203	0.032192533	0.065931988	0	0	0	Chr17	-	24052253	24058139	5887	244	sense-overlapping	XM_008771586.1	Chr17:24020874_24103771_-	Ranbp9	GeneID:364686,Genbank:XM_008771586.1,RGD:1561940	RAN binding protein 9, transcript variant X1	GO:0019899,GO:0070373,GO:0005515,GO:0005634,GO:0005737	enzyme binding|negative regulation of ERK1 and ERK2 cascade|protein binding|nucleus|cytoplasm
circRNA_2916|Chr18:24662368_24665851_+	2.180164043	0	4.360328086	Inf	Inf	0.01285676	0.977101241	Up	0	0	0	0.030503803	0.074220204	0.033096324	Chr18	+	24662368	24665851	3484	472	sense-overlapping	XM_006254589.3	Chr18:24584832_24689681_+	Wdr33	GeneID:307524,Genbank:XM_006254589.3,RGD:1309230	WD repeat domain 33, transcript variant X1	GO:0005575,GO:0005634,GO:0005654,GO:0005847,GO:0006378,GO:0006379,GO:0008150,GO:0001650,GO:0003674	cellular_component|nucleus|nucleoplasm|mRNA cleavage and polyadenylation specificity factor complex|mRNA polyadenylation|mRNA cleavage|biological_process|fibrillar center|molecular_function	rno03015	mRNA surveillance pathway
circRNA_3161|Chr19:31878182_31886209_+	1.848436291	0	3.696872581	Inf	Inf	0.030394462	0.977101241	Up	0	0	0	0.040671737	0.021205773	0.05516054	Chr19	+	31878182	31886209	8028	857	sense-overlapping	XM_006255407.3	Chr19:31867960_31892860_+	Abce1	GeneID:361390,Genbank:XM_006255407.3,RGD:1305301	ATP binding cassette subfamily E member 1, transcript variant X1	GO:0060698,GO:0005524,GO:0060702,GO:0005575,GO:0005737,GO:0005739,GO:0005829,GO:0005852,GO:0006413,GO:0006415,GO:0008150,GO:0000054,GO:0016887,GO:0003674,GO:0043024,GO:0005506	endoribonuclease inhibitor activity|ATP binding|negative regulation of endoribonuclease activity|cellular_component|cytoplasm|mitochondrion|cytosol|eukaryotic translation initiation factor 3 complex|translational initiation|translational termination|biological_process|ribosomal subunit export from nucleus|ATPase activity|molecular_function|ribosomal small subunit binding|iron ion binding
circRNA_3337|Chr2:24067948_24083767_+	4.675339144	1.964176396	7.386501891	3.760610251	1.910966794	0.04884196	0.977101241	Up	0.021546051	0.042923377	0	0.050839671	0.116631749	0.066192648	Chr2	+	24067948	24083767	15820	507	sense-overlapping	XM_006231814.3	Chr2:24022815_24227521_+	Ap3b1	GeneID:309969,Genbank:XM_006231814.3,RGD:1310256	adaptor-related protein complex 3, beta 1 subunit, transcript variant X1	GO:0007596,GO:0008089,GO:0008150,GO:0019882,GO:0019903,GO:0030123,GO:0030131,GO:0030742,GO:0032438,GO:0048007,GO:0048490,GO:0003674,GO:0051138,GO:0005575,GO:1904115,GO:0006622	blood coagulation|anterograde axonal transport|biological_process|antigen processing and presentation|protein phosphatase binding|AP-3 adaptor complex|clathrin adaptor complex|GTP-dependent protein binding|melanosome organization|antigen processing and presentation, exogenous lipid antigen via MHC class Ib|anterograde synaptic vesicle transport|molecular_function|positive regulation of NK T cell …	rno04142	Lysosome
circRNA_3425|Chr2:52310449_52313280_+	1.942835085	3.885670171	0	0	#NAME?	0.025206864	0.977101241	Down	0.053865127	0.042923377	0.032965994	0	0	0	Chr2	+	52310449	52313280	2832	299	sense-overlapping	XM_008760780.1	Chr2:52300921_52328212_+	Paip1	GeneID:365684,Genbank:XM_008760780.1,RGD:1305668	poly(A) binding protein interacting protein 1, transcript variant X3	GO:0003723,GO:0008494,GO:0045727	RNA binding|translation activator activity|positive regulation of translation	rno03013	RNA transport
circRNA_3753|Chr2:218919131_218929338_-	1.784517397	3.569034794	0	0	#NAME?	0.037967778	0.977101241	Down	0.032319076	0.042923377	0.043954659	0	0	0	Chr2	-	218919131	218929338	10208	337	sense-overlapping	NM_001191715.1	Chr2:218888431_218951030_-	Slc30a7	GeneID:310801,Genbank:NM_001191715.1,RGD:1307873	solute carrier family 30 member 7	GO:0071577,GO:0005794,GO:0006829,GO:0010043,GO:0016020,GO:0016021,GO:0031410,GO:0031982,GO:0032119,GO:0048471,GO:0005385,GO:0061088,GO:0005737	zinc ion transmembrane transport|Golgi apparatus|zinc ion transport|response to zinc ion|membrane|integral component of membrane|cytoplasmic vesicle|vesicle|sequestering of zinc ion|perinuclear region of cytoplasm|zinc ion transmembrane transporter activity|regulation of sequestering of zinc ion|cytoplasm
circRNA_4126|Chr3:21721366_21736929_+	1.783312868	3.566625737	0	0	#NAME?	0.03803028	0.977101241	Down	0.043092101	0.042923377	0.032965994	0	0	0	Chr3	+	21721366	21736929	15564	1411	sense-overlapping	XM_017591852.1	Chr3:21698037_21815333_+	Rabgap1	GeneID:311911,Genbank:XM_017591852.1,RGD:1304691	RAB GTPase activating protein 1, transcript variant X1	GO:0005829,GO:0006886,GO:0012505,GO:0017137,GO:0031338,GO:0043087,GO:0090630,GO:1902017,GO:0005096,GO:0005622	cytosol|intracellular protein transport|endomembrane system|Rab GTPase binding|regulation of vesicle fusion|regulation of GTPase activity|activation of GTPase activity|regulation of cilium assembly|GTPase activator activity|intracellular
circRNA_4136|Chr3:21859562_21904269_-	2.808223861	0.638088868	4.978358854	7.801983558	2.963840958	0.04192205	0.977101241	Up	0.021546051	0	0	0.091511408	0.042411545	0.022064216	Chr3	-	21859562	21904269	44708	1505	sense-overlapping	XM_008761778.2	Chr3:21827233_21956988_-	Strbp	GeneID:84476,Genbank:XM_008761778.2,RGD:620673	spermatid perinuclear RNA binding protein, transcript variant X3	GO:0015630,GO:0003725,GO:0003727,GO:0005634,GO:0005737,GO:0007275,GO:0007283,GO:0007286,GO:0007638,GO:0003677,GO:0003723	microtubule cytoskeleton|double-stranded RNA binding|single-stranded RNA binding|nucleus|cytoplasm|multicellular organism development|spermatogenesis|spermatid development|mechanosensory behavior|DNA binding|RNA binding
circRNA_4168|Chr3:37758808_37762316_-	2.359057363	0	4.718114727	Inf	Inf	0.008209051	0.977101241	Up	0	0	0	0.040671737	0.031808659	0.077224756	Chr3	-	37758808	37762316	3509	729	sense-overlapping	XM_006234174.3	Chr3:37658081_37855843_-	Neb	GeneID:311029,Genbank:XM_006234174.3,RGD:1311134	nebulin, transcript variant X1	GO:0043292,GO:0003779,GO:0030016,GO:0030018	contractile fiber|actin binding|myofibril|Z disc
circRNA_4225|Chr3:60610877_60624155_-	2.269322772	4.538645544	0	0	#NAME?	0.011061921	0.977101241	Down	0.053865127	0.053654222	0.043954659	0	0	0	Chr3	-	60610877	60624155	13279	241	sense-overlapping	XM_006234389.3	Chr3:60512360_60624671_-	Chn1	GeneID:84030,Genbank:XM_006234389.3,RGD:620139	chimerin 1, transcript variant X4	GO:0048013,GO:0005622,GO:0005737,GO:0050770,GO:0007165,GO:0008045,GO:0035556,GO:0043087,GO:0051056,GO:0043547,GO:0046872,GO:0001565,GO:0046875,GO:0005096	ephrin receptor signaling pathway|intracellular|cytoplasm|regulation of axonogenesis|signal transduction|motor neuron axon guidance|intracellular signal transduction|regulation of GTPase activity|regulation of small GTPase mediated signal transduction|positive regulation of GTPase activity|metal ion binding|phorbol ester receptor activity|ephrin receptor binding|GTPase activator activity
circRNA_4253|Chr3:67723614_67757148_-	108.3818183	0	216.7636366	Inf	Inf	7.02E-10	4.09E-06	Up	0	0	0	2.450472145	2.088768594	2.305710568	Chr3	-	67723614	67757148	33535	4379	sense-overlapping	NM_031618.1	Chr3:67725180_67804680_-	Nckap1	GeneID:58823,Genbank:NM_031618.1,RGD:61939	NCK-associated protein 1	GO:0010172,GO:0010592,GO:0016021,GO:0016477,GO:0016601,GO:0035050,GO:0030027,GO:0042074,GO:0030031,GO:0044877,GO:0030032,GO:0045175,GO:0045176,GO:0048339,GO:0048340,GO:0048365,GO:0000902,GO:0001701,GO:0001726,GO:0001756,GO:0001843,GO:0005515,GO:0007354,GO:0007492,GO:0008078,GO:0030838,GO:0030866,GO:0030903,GO:0030950,GO:0031209,GO:0048570,GO:0031258,GO:0048617,GO:0031941,GO:0048812,GO:0032880,GO:…	embryonic body morphogenesis|positive regulation of lamellipodium assembly|integral component of membrane|cell migration|Rac protein signal transduction|embryonic heart tube development|lamellipodium|cell migration involved in gastrulation|cell projection assembly|protein-containing complex binding|lamellipodium assembly|basal protein localization|apical protein localization|paraxial mesoderm dev…	rno04810	Regulation of actin cytoskeleton
circRNA_4375|Chr3:119383719_119384609_-	1.961551258	3.923102516	0	0	#NAME?	0.024602626	0.977101241	Down	0.021546051	0.07511591	0.032965994	0	0	0	Chr3	-	119383719	119384609	891	214	sense-overlapping	XM_006234920.3	Chr3:119361651_119405324_-	Sppl2a	GeneID:311401,Genbank:XM_006234920.3,RGD:1563001	signal peptide peptidase-like 2A, transcript variant X1	GO:0042803,GO:0005886,GO:0043231,GO:0050776,GO:0006465,GO:0006509,GO:0016020,GO:0030660,GO:0071458,GO:0031293,GO:0031902,GO:0071556,GO:0033619,GO:0005765,GO:0042500,GO:0005770	protein homodimerization activity|plasma membrane|intracellular membrane-bounded organelle|regulation of immune response|signal peptide processing|membrane protein ectodomain proteolysis|membrane|Golgi-associated vesicle membrane|integral component of cytoplasmic side of endoplasmic reticulum membrane|membrane protein intracellular domain proteolysis|late endosome membrane|integral component of l…
circRNA_4527|Chr4:2546232_2564215_+	2.016189589	0	4.032379178	Inf	Inf	0.019685066	0.977101241	Up	0	0	0	0.030503803	0.053014431	0.044128432	Chr4	+	2546232	2564215	17984	902	sense-overlapping	XM_008762667.2	Chr4:2505912_2606710_+	Ube3c	GeneID:362294,Genbank:XM_008762667.2,RGD:1559986	ubiquitin protein ligase E3C, transcript variant X1	GO:0005737,GO:0016567,GO:0061630,GO:0000209,GO:0004842	cytoplasm|protein ubiquitination|ubiquitin protein ligase activity|protein polyubiquitination|ubiquitin-protein transferase activity	rno04120	Ubiquitin mediated proteolysis
circRNA_4609|Chr4:31220330_31283358_+	2.888533355	0	5.77706671	Inf	Inf	0.022523968	0.977101241	Up	0	0	0	0	0.074220204	0.11032108	Chr4	+	31220330	31283358	63029	63029	antisense	XM_008762739.1	Chr4:31134165_31757006_-	Slc25a13	GeneID:362322,Genbank:XM_008762739.1,RGD:1565889	solute carrier family 25 member 13, transcript variant X1	GO:0022857,GO:0005509,GO:0043490,GO:0005575,GO:0005739,GO:0005743,GO:0006754,GO:0006839,GO:0008150,GO:0045333,GO:0015183,GO:0051592,GO:0015810,GO:0003674,GO:0015813,GO:0005313,GO:0016021	transmembrane transporter activity|calcium ion binding|malate-aspartate shuttle|cellular_component|mitochondrion|mitochondrial inner membrane|ATP biosynthetic process|mitochondrial transport|biological_process|cellular respiration|L-aspartate transmembrane transporter activity|response to calcium ion|aspartate transmembrane transport|molecular_function|L-glutamate transmembrane transport|L-glutam…
circRNA_4729|Chr4:70820222_70825218_+	1.953891924	3.907783847	0	0	#NAME?	0.036680221	0.977101241	Down	0	0.053654222	0.076920653	0	0	0	Chr4	+	70820222	70825218	4997	4997	intergenic
circRNA_4860|Chr4:140176029_140185951_-	2.576878205	5.153756409	0	0	#NAME?	0.010516604	0.977101241	Down	0.043092101	0.021461689	0.109886647	0	0	0	Chr4	-	140176029	140185951	9923	435	sense-overlapping	NM_001108639.1	Chr4:140139017_140220482_-	Sumf1	GeneID:362409,Genbank:NM_001108639.1,RGD:1309939	sulfatase modifying factor 1	GO:0005783,GO:0008150,GO:0042803,GO:0003674,GO:0005575	endoplasmic reticulum|biological_process|protein homodimerization activity|molecular_function|cellular_component	rno04142	Lysosome
circRNA_4916|Chr4:157436084_157436365_-	8.930775417	4.14757764	13.71397319	3.306501863	1.725305715	0.03366574	0.977101241	Up	0.140049329	0	0	0.152519013	0.16964618	0.11032108	Chr4	-	157436084	157436365	282	132	sense-overlapping	NM_031975.2	Chr4:157435371_157439507_-	Ptms	GeneID:83801,Genbank:NM_031975.2,RGD:621529	parathymosin	GO:0008270,GO:0043086,GO:0002376,GO:0004857,GO:0005829	zinc ion binding|negative regulation of catalytic activity|immune system process|enzyme inhibitor activity|cytosol
circRNA_4919|Chr4:157436084_157436610_-	2.241742737	4.483485474	0	0	#NAME?	0.024754927	0.977101241	Down	0.075411177	0	0.076920653	0	0	0	Chr4	-	157436084	157436610	527	183	sense-overlapping	NM_031975.2	Chr4:157435371_157439507_-	Ptms	GeneID:83801,Genbank:NM_031975.2,RGD:621529	parathymosin	GO:0008270,GO:0043086,GO:0002376,GO:0004857,GO:0005829	zinc ion binding|negative regulation of catalytic activity|immune system process|enzyme inhibitor activity|cytosol
circRNA_5301|Chr5:128130304_128136348_+	2.019929131	0	4.039858262	Inf	Inf	0.019593417	0.977101241	Up	0	0	0	0.030503803	0.042411545	0.05516054	Chr5	+	128130304	128136348	6045	276	sense-overlapping	NM_001107953.1	Chr5:128063880_128168726_+	Zcchc11	GeneID:313481,Genbank:NM_001107953.1,RGD:1310138	zinc finger CCHC-type containing 11	GO:0031664,GO:0005634,GO:0032088,GO:0005730,GO:0032755,GO:0005737,GO:0005829,GO:0008150,GO:0050265,GO:0008270,GO:0070102,GO:0010586,GO:0071044,GO:0010587,GO:0019827,GO:0001816,GO:0031054,GO:0003674,GO:0031123,GO:0005575	regulation of lipopolysaccharide-mediated signaling pathway|nucleus|negative regulation of NF-kappaB transcription factor activity|nucleolus|positive regulation of interleukin-6 production|cytoplasm|cytosol|biological_process|RNA uridylyltransferase activity|zinc ion binding|interleukin-6-mediated signaling pathway|miRNA metabolic process|histone mRNA catabolic process|miRNA catabolic process|ste…
circRNA_5739|Chr6:72548978_72550668_-	5.220742304	8.38404215	2.057442459	0.245399823	-2.026793887	0.027194847	0.977101241	Down	0.107730253	0.053654222	0.120875311	0	0	0.066192648	Chr6	-	72548978	72550668	1691	242	sense-overlapping	XM_006240086.2	Chr6:72509658_72596285_-	Hectd1	GeneID:362736,Genbank:XM_006240086.2,RGD:1561653	HECT domain E3 ubiquitin protein ligase 1, transcript variant X1	GO:0070534,GO:0003170,GO:0003281,GO:1903077,GO:0005737,GO:0016567,GO:0030154,GO:0035904,GO:0046872,GO:0048856,GO:0051865,GO:0060707,GO:0060708,GO:0001779,GO:0061630,GO:0001843,GO:0001892	protein K63-linked ubiquitination|heart valve development|ventricular septum development|negative regulation of protein localization to plasma membrane|cytoplasm|protein ubiquitination|cell differentiation|aorta development|metal ion binding|anatomical structure development|protein autoubiquitination|trophoblast giant cell differentiation|spongiotrophoblast differentiation|natural killer cell dif…
circRNA_5944|Chr6:133777712_133795645_+	5.704006327	11.40801265	0	0	#NAME?	1.88E-05	0.05475544	Down	0.107730253	0.193155198	0.076920653	0	0	0	Chr6	+	133777712	133795645	17934	17934	intergenic
circRNA_6036|Chr7:18533478_18535599_-	5.558502911	9.059563362	2.057442459	0.227101724	-2.138589436	0.017685381	0.977101241	Down	0.096957228	0.085846755	0.120875311	0	0	0.066192648	Chr7	-	18533478	18535599	2122	265	sense-overlapping	XM_008765198.2	Chr7:18516253_18547572_-	Hnrnpm	GeneID:116655,Genbank:XM_008765198.2,RGD:620369	heterogeneous nuclear ribonucleoprotein M, transcript variant X2	GO:1990405,GO:0019904,GO:0000398,GO:1990831,GO:0042382,GO:0003723,GO:0003729,GO:0005515,GO:0005634,GO:0005654,GO:0048306,GO:0005681,GO:0071013,GO:0005737,GO:0009986,GO:0071222,GO:0016363,GO:0000380,GO:1900182,GO:1904591	protein antigen binding|protein domain specific binding|mRNA splicing, via spliceosome|cellular response to carcinoembryonic antigen|paraspeckles|RNA binding|mRNA binding|protein binding|nucleus|nucleoplasm|calcium-dependent protein binding|spliceosomal complex|catalytic step 2 spliceosome|cytoplasm|cell surface|cellular response to lipopolysaccharide|nuclear matrix|alternative mRNA splicing, via…	rno03040	Spliceosome
circRNA_6119|Chr7:60397574_60408823_-	6.303734958	2.933354983	9.674114932	3.297969386	1.721578007	0.03915387	0.977101241	Up	0	0.042923377	0.054943323	0.122015211	0.127234635	0.05516054	Chr7	-	60397574	60408823	11250	1713	sense-overlapping	XM_006241372.2	Chr7:60386308_60416957_-	Cpsf6	GeneID:299811,Genbank:XM_006241372.2,RGD:1304640	cleavage and polyadenylation specific factor 6, transcript variant X2	GO:0051262,GO:0016607,GO:0005575,GO:0051290,GO:0005634,GO:0035061,GO:0005654,GO:0098789,GO:0005726,GO:0005737,GO:0005847,GO:0042382,GO:1990448,GO:0043023,GO:0005849,GO:0006378,GO:0003674,GO:0046833,GO:0006397,GO:0003723,GO:0008150,GO:0003729	protein tetramerization|nuclear speck|cellular_component|protein heterotetramerization|nucleus|interchromatin granule|nucleoplasm|pre-mRNA cleavage required for polyadenylation|perichromatin fibrils|cytoplasm|mRNA cleavage and polyadenylation specificity factor complex|paraspeckles|exon-exon junction complex binding|ribosomal large subunit binding|mRNA cleavage factor complex|mRNA polyadenylation…	rno03015	mRNA surveillance pathway
circRNA_6296|Chr7:130113212_130116591_-	3.089263615	6.178527229	0	0	#NAME?	0.0013721	0.977101241	Down	0.043092101	0.085846755	0.076920653	0	0	0	Chr7	-	130113212	130116591	3380	364	sense-overlapping	XM_017595075.1	Chr7:130109214_130120918_-	Mapk12	GeneID:60352,Genbank:XM_017595075.1,RGD:70975	mitogen-activated protein kinase 12, transcript variant X1	GO:0018105,GO:0004674,GO:0035556,GO:0004707,GO:0045445,GO:0005515,GO:0005524,GO:0005634,GO:0005737,GO:0045786,GO:0071310,GO:0005739,GO:0006351,GO:0006355,GO:0000165,GO:0006468,GO:0000287,GO:0010468	peptidyl-serine phosphorylation|protein serine/threonine kinase activity|intracellular signal transduction|MAP kinase activity|myoblast differentiation|protein binding|ATP binding|nucleus|cytoplasm|negative regulation of cell cycle|cellular response to organic substance|mitochondrion|transcription, DNA-templated|regulation of transcription, DNA-templated|MAPK cascade|protein phosphorylation|magne…	rno04015,rno04010,rno04370,rno04668,rno04068,rno04071,rno04114,rno04218,rno04550,rno04611,rno04620,rno04621,rno04622,rno04625,rno04660,rno04658,rno04659,rno04657,rno04664,rno04670,rno04912,rno04914,rno04917,rno04926,rno04261,rno04728,rno04723,rno04722,rno04750,rno04380,rno04714,rno05205,rno05014,rno05418,rno04933,rno05132,rno05133,rno05152,rno05164,rno05160,rno05167,rno05169,rno05145,rno05140,rno…	Rap1 signaling pathway|MAPK signaling pathway|VEGF signaling pathway|TNF signaling pathway|FoxO signaling pathway|Sphingolipid signaling pathway|Oocyte meiosis|Cellular senescence|Signaling pathways regulating pluripotency of stem cells|Platelet activation|Toll-like receptor signaling pathway|NOD-like receptor signaling pathway|RIG-I-like receptor signaling pathway|C-type lectin receptor signalin…
circRNA_6370|Chr8:19886208_19890764_+	10.28438914	4.850030644	15.71874765	3.240958419	1.696420511	0.018640724	0.977101241	Up	0.053865127	0.042923377	0.065931988	0.19319075	0.159043294	0.143417404	Chr8	+	19886208	19890764	4557	651	sense-overlapping	XM_006242578.2	Chr8:19867535_19905160_+	Zfp317	GeneID:500950,Genbank:XM_006242578.2,RGD:1565419	zinc finger protein 317, transcript variant X8	GO:0006355,GO:0046872,GO:0003676,GO:0003700,GO:0005634	regulation of transcription, DNA-templated|metal ion binding|nucleic acid binding|DNA binding transcription factor activity|nucleus
circRNA_6993|Chr9:69854064_69860576_-	2.122278003	4.244556006	0	0	#NAME?	0.016369364	0.977101241	Down	0.021546051	0.07511591	0.043954659	0	0	0	Chr9	-	69854064	69860576	6513	840	sense-overlapping	XM_006245029.2	Chr9:69820520_69886930_-	Ino80d	GeneID:316440,Genbank:XM_006245029.2,RGD:1304808	INO80 complex subunit D, transcript variant X3	GO:0008150,GO:0003674,GO:0005575,GO:0005634	biological_process|molecular_function|cellular_component|nucleus
circRNA_7153|ChrX:24915725_24919260_+	1.837217664	0	3.674435329	Inf	Inf	0.030850227	0.977101241	Up	0	0	0	0.040671737	0.053014431	0.022064216	ChrX	+	24915725	24919260	3536	314	sense-overlapping	XM_228858.8	ChrX:24872496_24988671_+	Wwc3	GeneID:317439,Genbank:XM_228858.8,RGD:1560666	WWC family member 3	GO:0032947,GO:0035331,GO:0046621,GO:0000122,GO:0005829,GO:0019900	protein-containing complex scaffold activity|negative regulation of hippo signaling|negative regulation of organ growth|negative regulation of transcription by RNA polymerase II|cytosol|kinase binding
circRNA_7258|ChrX:137709443_137733342_-	1.795790317	3.591580633	0	0	#NAME?	0.037390538	0.977101241	Down	0.021546051	0.064385066	0.032965994	0	0	0	ChrX	-	137709443	137733342	23900	23900	intergenic
