# Supplementary material for: Comprehensive Analysis of the Profiles of Differentially Expressed mRNAs, lncRNAs, and circRNAs in Phosgene-Induced Acute Lung Injury
Source: Biomed Res Int. 2021 Jan 9;2021:6278526. doi: 10.1155/2021/6278526 (PMC7811572; doi:10.1155/2021/6278526)
Supplement: Supplementary 10 — Table S10: GO with differentially expressed mRNAs between the A and B group. [file 6278526.f10.txt]

Table S10 GO with differentially expressed mRNAs between A and B group
id	Term	Category	ListHits	ListTotal	PopHits	PopTotal	pValue	qValue	Enrichment_score	Gene
GO:0002657	positive regulation of tolerance induction to nonself antigen	biological_process	1	341	1	19037	0	0	55.82697947	RT1-A1
GO:0019785	ISG15-specific protease activity	molecular_function	1	341	1	19037	0	0	55.82697947	Usp18
GO:0050543	icosatetraenoic acid binding	molecular_function	1	341	1	19037	0	0	55.82697947	Fabp3
GO:2001245	regulation of phosphatidylcholine biosynthetic process	biological_process	1	341	1	19037	0	0	55.82697947	Fabp3
GO:0016889	endodeoxyribonuclease activity, producing 3'-phosphomonoesters	molecular_function	1	341	1	19037	0	0	55.82697947	Spo11
GO:0061339	establishment or maintenance of monopolar cell polarity	biological_process	1	341	1	19037	0	0	55.82697947	Carmil2
GO:0003934	GTP cyclohydrolase I activity	molecular_function	1	341	1	19037	0	0	55.82697947	Gch1
GO:0035998	7,8-dihydroneopterin 3'-triphosphate biosynthetic process	biological_process	1	341	1	19037	0	0	55.82697947	Gch1
GO:0042559	pteridine-containing compound biosynthetic process	biological_process	1	341	1	19037	0	0	55.82697947	Gch1
GO:0051066	dihydrobiopterin metabolic process	biological_process	1	341	1	19037	0	0	55.82697947	Gch1
GO:0000957	mitochondrial RNA catabolic process	biological_process	1	341	1	19037	0	0	55.82697947	Pnpt1
GO:0004654	polyribonucleotide nucleotidyltransferase activity	molecular_function	1	341	1	19037	0	0	55.82697947	Pnpt1
GO:0035927	RNA import into mitochondrion	biological_process	1	341	1	19037	0	0	55.82697947	Pnpt1
GO:0097222	mitochondrial mRNA polyadenylation	biological_process	1	341	1	19037	0	0	55.82697947	Pnpt1
GO:0002737	negative regulation of plasmacytoid dendritic cell cytokine production	biological_process	1	341	1	19037	0	0	55.82697947	Bst2
GO:1903901	negative regulation of viral life cycle	biological_process	1	341	1	19037	0	0	55.82697947	Bst2
GO:0086103	G-protein coupled receptor signaling pathway involved in heart process	biological_process	1	341	1	19037	0	0	55.82697947	Ramp3
GO:0060611	mammary gland fat development	biological_process	1	341	1	19037	0	0	55.82697947	Csf1
GO:1902228	positive regulation of macrophage colony-stimulating factor signaling pathway	biological_process	1	341	1	19037	0	0	55.82697947	Csf1
GO:1904141	positive regulation of microglial cell migration	biological_process	1	341	1	19037	0	0	55.82697947	Csf1
GO:1901846	positive regulation of cell communication by electrical coupling involved in cardiac conduction	biological_process	1	341	1	19037	0	0	55.82697947	Trdn
GO:0030887	positive regulation of myeloid dendritic cell activation	biological_process	1	341	1	19037	0	0	55.82697947	Klrk1
GO:0032394	MHC class Ib receptor activity	molecular_function	1	341	1	19037	0	0	55.82697947	Klrk1
GO:0003884	D-amino-acid oxidase activity	molecular_function	1	341	1	19037	0	0	55.82697947	Dao
GO:0036088	D-serine catabolic process	biological_process	1	341	1	19037	0	0	55.82697947	Dao
GO:0055130	D-alanine catabolic process	biological_process	1	341	1	19037	0	0	55.82697947	Dao
GO:0010533	regulation of activation of Janus kinase activity	biological_process	1	341	1	19037	0	0	55.82697947	Socs1
GO:0002715	regulation of natural killer cell mediated immunity	biological_process	1	341	1	19037	0	0	55.82697947	RT1-S3
GO:0002717	positive regulation of natural killer cell mediated immunity	biological_process	1	341	1	19037	0	0	55.82697947	RT1-S3
GO:0032759	positive regulation of TRAIL production	biological_process	1	341	1	19037	0	0	55.82697947	RT1-S3
GO:0036037	CD8-positive, alpha-beta T cell activation	biological_process	1	341	1	19037	0	0	55.82697947	RT1-S3
GO:1903487	regulation of lactation	biological_process	1	341	1	19037	0	0	55.82697947	Oas2
GO:0006218	uridine catabolic process	biological_process	1	341	1	19037	0	0	55.82697947	Upp1
GO:0046108	uridine metabolic process	biological_process	1	341	1	19037	0	0	55.82697947	Upp1
GO:0060330	regulation of response to interferon-gamma	biological_process	1	341	1	19037	0	0	55.82697947	Parp9
GO:0072570	ADP-D-ribose binding	molecular_function	1	341	1	19037	0	0	55.82697947	Parp9
GO:0034342	response to type III interferon	biological_process	1	341	1	19037	0	0	55.82697947	LOC500956
GO:1900225	regulation of NLRP3 inflammasome complex assembly	biological_process	1	341	1	19037	0	0	55.82697947	Eif2ak2
GO:0061501	cyclic-GMP-AMP synthase activity	molecular_function	1	341	1	19037	0	0	55.82697947	Mb21d1
GO:0018120	peptidyl-arginine ADP-ribosylation	biological_process	1	341	1	19037	0	0	55.82697947	Art2b
GO:0061810	NAD glycohydrolase activity	molecular_function	1	341	1	19037	0	0	55.82697947	Art2b
GO:0047280	nicotinamide phosphoribosyltransferase activity	molecular_function	1	341	1	19037	0	0	55.82697947	Nampt
GO:0051381	histamine binding	molecular_function	1	341	1	19037	0	0	55.82697947	Hrh1
GO:1900039	positive regulation of cellular response to hypoxia	biological_process	1	341	1	19037	0	0	55.82697947	Kcnk2
GO:0007522	visceral muscle development	biological_process	1	341	1	19037	0	0	55.82697947	Myh6
GO:0007039	protein catabolic process in the vacuole	biological_process	1	341	1	19037	0	0	55.82697947	Tcirg1
GO:0010819	regulation of T cell chemotaxis	biological_process	2	341	2	19037	0	0	55.82697947	Cxcl10; Lgals9
GO:1902044	regulation of Fas signaling pathway	biological_process	1	341	1	19037	0	0	55.82697947	Sp100
GO:0002577	regulation of antigen processing and presentation	biological_process	1	341	1	19037	0	0	55.82697947	Ptpn22
GO:0035644	phosphoanandamide dephosphorylation	biological_process	1	341	1	19037	0	0	55.82697947	Ptpn22
GO:0005585	collagen type II trimer	cellular_component	1	341	1	19037	0	0	55.82697947	Col2a1
GO:0071678	olfactory bulb axon guidance	biological_process	1	341	1	19037	0	0	55.82697947	Bcl11b
GO:0008832	dGTPase activity	molecular_function	1	341	1	19037	0	0	55.82697947	Samhd1
GO:0016793	triphosphoric monoester hydrolase activity	molecular_function	1	341	1	19037	0	0	55.82697947	Samhd1
GO:0032567	dGTP binding	molecular_function	1	341	1	19037	0	0	55.82697947	Samhd1
GO:0060427	lung connective tissue development	biological_process	1	341	1	19037	0	0	55.82697947	Rxfp1
GO:0060658	nipple morphogenesis	biological_process	1	341	1	19037	0	0	55.82697947	Rxfp1
GO:0060262	negative regulation of N-terminal protein palmitoylation	biological_process	1	341	1	19037	0	0	55.82697947	Hhatl
GO:0030338	CMP-N-acetylneuraminate monooxygenase activity	molecular_function	1	341	1	19037	0	0	55.82697947	Cmah
GO:0046381	CMP-N-acetylneuraminate metabolic process	biological_process	1	341	1	19037	0	0	55.82697947	Cmah
GO:0003867	4-aminobutyrate transaminase activity	molecular_function	1	341	1	19037	0	0	55.82697947	Abat
GO:0032144	4-aminobutyrate transaminase complex	cellular_component	1	341	1	19037	0	0	55.82697947	Abat
GO:0032145	succinate-semialdehyde dehydrogenase binding	molecular_function	1	341	1	19037	0	0	55.82697947	Abat
GO:0034386	4-aminobutyrate:2-oxoglutarate transaminase activity	molecular_function	1	341	1	19037	0	0	55.82697947	Abat
GO:0047298	(S)-3-amino-2-methylpropionate transaminase activity	molecular_function	1	341	1	19037	0	0	55.82697947	Abat
GO:1904450	positive regulation of aspartate secretion	biological_process	1	341	1	19037	0	0	55.82697947	Abat
GO:0003692	left-handed Z-DNA binding	molecular_function	1	341	1	19037	0	0	55.82697947	Zbp1
GO:0034124	regulation of MyD88-dependent toll-like receptor signaling pathway	biological_process	2	341	2	19037	0	0	55.82697947	Irf1; Irf7
GO:2000564	regulation of CD8-positive, alpha-beta T cell proliferation	biological_process	1	341	1	19037	0	0	55.82697947	Irf1
GO:0034127	regulation of MyD88-independent toll-like receptor signaling pathway	biological_process	1	341	1	19037	0	0	55.82697947	Irf7
GO:0043383	negative T cell selection	biological_process	1	341	1	19037	0	0	55.82697947	Themis
GO:0031073	cholesterol 26-hydroxylase activity	molecular_function	1	341	1	19037	0	0	55.82697947	Cyp27a1
GO:0051695	actin filament uncapping	biological_process	1	341	1	19037	0	0	55.82697947	Actn2
GO:0072616	interleukin-18 secretion	biological_process	1	341	1	19037	0	0	55.82697947	Gbp5
GO:0032972	regulation of muscle filament sliding speed	biological_process	2	341	2	19037	0	0	55.82697947	Tnnc1; Tnnt2
GO:1990584	cardiac Troponin complex	cellular_component	3	341	3	19037	0	0	55.82697947	Tnnc1; Tnni3; Tnnt2
GO:0048290	isotype switching to IgA isotypes	biological_process	1	341	1	19037	0	0	55.82697947	Ccr6
GO:1904155	DN2 thymocyte differentiation	biological_process	1	341	1	19037	0	0	55.82697947	Ccr6
GO:1904156	DN3 thymocyte differentiation	biological_process	1	341	1	19037	0	0	55.82697947	Ccr6
GO:0002885	positive regulation of hypersensitivity	biological_process	1	341	1	19037	0	0	55.82697947	Ccr7
GO:0035757	chemokine (C-C motif) ligand 19 binding	molecular_function	1	341	1	19037	0	0	55.82697947	Ccr7
GO:0035758	chemokine (C-C motif) ligand 21 binding	molecular_function	1	341	1	19037	0	0	55.82697947	Ccr7
GO:0038115	chemokine (C-C motif) ligand 19 signaling pathway	biological_process	1	341	1	19037	0	0	55.82697947	Ccr7
GO:0038116	chemokine (C-C motif) ligand 21 signaling pathway	biological_process	1	341	1	19037	0	0	55.82697947	Ccr7
GO:0038117	C-C motif chemokine 19 receptor activity	molecular_function	1	341	1	19037	0	0	55.82697947	Ccr7
GO:0038121	C-C motif chemokine 21 receptor activity	molecular_function	1	341	1	19037	0	0	55.82697947	Ccr7
GO:2000522	positive regulation of immunological synapse formation	biological_process	1	341	1	19037	0	0	55.82697947	Ccr7
GO:2000526	positive regulation of glycoprotein biosynthetic process involved in immunological synapse formation	biological_process	1	341	1	19037	0	0	55.82697947	Ccr7
GO:0010522	regulation of calcium ion transport into cytosol	biological_process	1	341	1	19037	0	0	55.82697947	Pml
GO:0032938	negative regulation of translation in response to oxidative stress	biological_process	1	341	1	19037	0	0	55.82697947	Pml
GO:0045343	regulation of MHC class I biosynthetic process	biological_process	1	341	1	19037	0	0	55.82697947	Pml
GO:0019782	ISG15 activating enzyme activity	molecular_function	1	341	1	19037	0	0	55.82697947	Uba7
GO:0005035	death receptor activity	molecular_function	1	341	1	19037	0	0	55.82697947	Ngfr
GO:0004122	cystathionine beta-synthase activity	molecular_function	1	341	1	19037	0	0	55.82697947	Cbs
GO:0006535	cysteine biosynthetic process from serine	biological_process	1	341	1	19037	0	0	55.82697947	Cbs
GO:0070025	carbon monoxide binding	molecular_function	1	341	1	19037	0	0	55.82697947	Cbs
GO:0070026	nitric oxide binding	molecular_function	1	341	1	19037	0	0	55.82697947	Cbs
GO:0098605	selenocystathionine beta-synthase activity	molecular_function	1	341	1	19037	0	0	55.82697947	Cbs
GO:0001980	regulation of systemic arterial blood pressure by ischemic conditions	biological_process	1	341	1	19037	0	0	55.82697947	Tnni3
GO:0005674	transcription factor TFIIF complex	cellular_component	1	341	1	19037	0	0	55.82697947	Gtf2f2
GO:0070228	regulation of lymphocyte apoptotic process	biological_process	1	341	1	19037	0	0	55.82697947	Cd3g
GO:0046130	purine ribonucleoside catabolic process	biological_process	1	341	1	19037	0	0	55.82697947	Enpp4
GO:0045299	otolith mineralization	biological_process	1	341	1	19037	0	0	55.82697947	Atp2b2
GO:0034346	positive regulation of type III interferon production	biological_process	1	341	1	19037	0	0	55.82697947	Tlr3
GO:0045065	cytotoxic T cell differentiation	biological_process	1	341	1	19037	0	0	55.82697947	Cd8a
GO:0046314	phosphocreatine biosynthetic process	biological_process	1	341	1	19037	0	0	55.82697947	Ckm
GO:0042597	periplasmic space	cellular_component	1	341	1	19037	0	0	55.82697947	Zp2
GO:0004113	2',3'-cyclic-nucleotide 3'-phosphodiesterase activity	molecular_function	1	341	1	19037	0	0	55.82697947	Cnp
GO:0009214	cyclic nucleotide catabolic process	biological_process	1	341	1	19037	0	0	55.82697947	Cnp
GO:1990092	calcium-dependent self proteolysis	biological_process	1	341	1	19037	0	0	55.82697947	Capn8
GO:0086069	bundle of His cell to Purkinje myocyte communication	biological_process	1	341	1	19037	0	0	55.82697947	Tnni3k
GO:0002566	somatic diversification of immune receptors via somatic mutation	biological_process	1	341	1	19037	0	0	55.82697947	Adar
GO:1900369	negative regulation of RNA interference	biological_process	1	341	1	19037	0	0	55.82697947	Adar
GO:1903920	positive regulation of actin filament severing	biological_process	1	341	1	19037	0	0	55.82697947	Csrp3
GO:0072028	nephron morphogenesis	biological_process	1	341	1	19037	0	0	55.82697947	Six2
GO:0090189	regulation of branching involved in ureteric bud morphogenesis	biological_process	1	341	1	19037	0	0	55.82697947	Six2
GO:0002397	MHC class I protein complex assembly	biological_process	1	341	1	19037	0	0	55.82697947	Tapbp
GO:0002479	antigen processing and presentation of exogenous peptide antigen via MHC class I, TAP-dependent	biological_process	1	341	1	19037	0	0	55.82697947	Tapbp
GO:0050823	peptide antigen stabilization	biological_process	1	341	1	19037	0	0	55.82697947	Tapbp
GO:0043322	negative regulation of natural killer cell degranulation	biological_process	1	341	1	19037	0	0	55.82697947	Lgals9
GO:0070241	positive regulation of activated T cell autonomous cell death	biological_process	1	341	1	19037	0	0	55.82697947	Lgals9
GO:0048264	determination of ventral identity	biological_process	1	341	1	19037	0	0	55.82697947	Aida
GO:0034240	negative regulation of macrophage fusion	biological_process	1	341	1	19037	0	0	55.82697947	Stat1
GO:0048242	epinephrine secretion	biological_process	1	341	1	19037	0	0	55.82697947	Ly6e
GO:0002372	myeloid dendritic cell cytokine production	biological_process	1	341	1	19037	0	0	55.82697947	Camk4
GO:0039530	MDA-5 signaling pathway	biological_process	1	341	1	19037	0	0	55.82697947	Ifih1
GO:0032558	adenyl deoxyribonucleotide binding	molecular_function	1	341	1	19037	0	0	55.82697947	Trex1
GO:1901586	negative regulation of acid-sensing ion channel activity	biological_process	1	341	1	19037	0	0	55.82697947	Stoml1
GO:0036153	triglyceride acyl-chain remodeling	biological_process	1	341	1	19037	0	0	55.82697947	Pnpla3
GO:0051264	mono-olein transacylation activity	molecular_function	1	341	1	19037	0	0	55.82697947	Pnpla3
GO:0051265	diolein transacylation activity	molecular_function	1	341	1	19037	0	0	55.82697947	Pnpla3
GO:2000116	regulation of cysteine-type endopeptidase activity	biological_process	1	341	1	19037	0	0	55.82697947	Psmb9
GO:0002414	immunoglobulin transcytosis in epithelial cells	biological_process	1	341	1	19037	0	0	55.82697947	Cd300lg
GO:0032980	keratinocyte activation	biological_process	1	341	1	19037	0	0	55.82697947	Krt2
GO:0002590	negative regulation of antigen processing and presentation of peptide antigen via MHC class I	biological_process	1	341	1	19037	0	0	55.82697947	Tapbpl
GO:0033668	negative regulation by symbiont of host apoptotic process	biological_process	1	341	1	19037	0	0	55.82697947	Serpinb9
GO:0035491	positive regulation of leukotriene production involved in inflammatory response	biological_process	1	341	1	19037	0	0	55.82697947	Serpine1
GO:0061044	negative regulation of vascular wound healing	biological_process	1	341	1	19037	0	0	55.82697947	Serpine1
GO:1901331	positive regulation of odontoblast differentiation	biological_process	1	341	1	19037	0	0	55.82697947	Serpine1
GO:0051607	defense response to virus	biological_process	41	341	145	19037	3.77E-39	6.21E-38	15.78555971	Rnase2; Trim30c; Ifitm3; Bst2; Rtp4; Isg15; Isg20; Oas2; Oas3; Trim5; Oasl; LOC500956; Eif2ak2; Mb21d1; Oas1a; Oas1b; Oas1g; Oas1i; Cxcl10; Ifit1bl; Nt5c3a; Samhd1; Ddx58; Irf1; Irf7; Rsad2; Tlr3; Cd8a; Adar; Ifi44l; Zc3hav1; Stat1; Stat2; Mx1; Mx2; Ifih1; Oasl2; Ifit1; Ifit2; Ifit3; Nlrc5
GO:0035458	cellular response to interferon-beta	biological_process	19	341	34	19037	7.34E-27	1.20E-25	31.19742971	RGD1309362; Pnpt1; RGD1305184; Ifi47; MGC105567; Irf1; Irgm; Gbp1; Gbp2; Gbp4; Tlr3; Mnda; MGC108823; Stat1; LOC100910979; Trex1; Igtp; Ifit1; Ifit3
GO:0009615	response to virus	biological_process	24	341	80	19037	1.32E-24	2.14E-23	16.74809384	Dhx58; Ifitm3; Bst2; Isg20; Oas2; Oas3; Oasl; Ifi27l2b; Eif2ak2; Oas1a; Oas1b; Cxcl10; Ddx58; Rsad2; Tlr3; Adar; Zc3hav1; Mx1; Mx2; Ifih1; Oasl2; Ifit1; Ifit2; Ifit3
GO:0045071	negative regulation of viral genome replication	biological_process	18	341	40	19037	3.65E-23	5.89E-22	25.12214076	Ifitm3; Bst2; Isg15; Isg20; Oas2; Oas3; Oasl; LOC500956; Eif2ak2; Oas1a; Oas1b; Oas1i; Rsad2; Adar; Zc3hav1; Mx2; Parp10; Oasl2
GO:0002474	antigen processing and presentation of peptide antigen via MHC class I	biological_process	10	341	19	19037	3.45E-15	5.53E-14	29.38262077	RT1-A1; RT1-A2; LOC100364500; RT1-N3; RT1-S3; RT1-CE4; RT1-T24-1; RT1-T24-3; RT1-T24-4; RT1-CE10
GO:0001730	2'-5'-oligoadenylate synthetase activity	molecular_function	7	341	10	19037	4.26E-13	6.74E-12	39.07888563	Oas2; Oas3; Oasl; Oas1a; Oas1b; Oas1i; Oasl2
GO:0060700	regulation of ribonuclease activity	biological_process	7	341	10	19037	4.26E-13	6.74E-12	39.07888563	Oas2; Oas3; Oasl; Oas1a; Oas1b; Oas1i; Oasl2
GO:0006955	immune response	biological_process	24	341	228	19037	4.84E-13	7.60E-12	5.876524155	RT1-A1; RT1-A2; Zap70; Sectm1b; LOC100364500; Oas2; Oas3; RT1-CE4; Oas1a; Oas1b; Oas1g; Oas1i; Cxcl10; Tnfrsf14; Ccr4; Ccr7; Ngfr; Cd27; Ifi44l; Tnfsf10; Oasl2; Serpinb9; RT1-T24-4; RT1-CE10
GO:0042612	MHC class I protein complex	cellular_component	7	341	11	19037	1.54E-12	2.40E-11	35.52625966	RT1-A1; RT1-A2; LOC100364500; RT1-S3; RT1-CE4; RT1-T24-4; RT1-CE10
GO:0045087	innate immune response	biological_process	25	341	265	19037	2.18E-12	3.38E-11	5.266696177	Trim30c; Zap70; Srms; Bst2; Trim21; Trim25; Csf1; Oas3; Trim5; Oasl; Eif2ak2; Oas1a; Oas1b; Sp110; Ddx58; Irgm; Rsad2; Pml; Adar; Zc3hav1; Mx1; Mx2; Ifih1; Oasl2; Nlrc5
GO:0006952	defense response	biological_process	12	341	50	19037	3.04E-12	4.68E-11	13.39847507	RGD1309362; RGD1305184; Ifi47; MGC105567; Irgm; Cd6; Tlr3; MGC108823; Tapbp; LOC100910979; Igtp; Tap1
GO:0003725	double-stranded RNA binding	molecular_function	13	341	71	19037	2.57E-11	3.93E-10	10.22184131	Dhx58; Oas2; Oas3; Oasl; Eif2ak2; Oas1a; Oas1b; Oas1g; Oas1i; Ddx58; Tlr3; Ifih1; Oasl2
GO:0042605	peptide antigen binding	molecular_function	9	341	29	19037	4.42E-11	6.70E-10	17.32561432	RT1-A1; RT1-A2; RT1-N3; RT1-S3; Tap1; RT1-T24-1; RT1-T24-3; RT1-T24-4; RT1-CE10
GO:0032481	positive regulation of type I interferon production	biological_process	7	341	18	19037	3.66E-10	5.51E-09	21.71049202	Dhx58; Mb21d1; Ptpn22; Irf1; Irf7; Tlr3; Zc3hav1
GO:0034340	response to type I interferon	biological_process	5	341	8	19037	8.59E-10	1.29E-08	34.89186217	Isg15; LOC500956; Sp100; Stat1; Mx2
GO:0042101	T cell receptor complex	cellular_component	6	341	14	19037	1.71E-09	2.55E-08	23.92584835	Zap70; Skap1; Trat1; Cd6; Cd3d; Cd3e
GO:0006941	striated muscle contraction	biological_process	7	341	22	19037	2.51E-09	3.71E-08	17.76312983	Smpx; Myom2; Myh6; Tnni3; Pgam2; Mybpc1; Mybpc3
GO:0070212	protein poly-ADP-ribosylation	biological_process	4	341	6	19037	1.06E-08	1.56E-07	37.21798631	Parp9; Zc3hav1; Parp10; Parp14
GO:0055010	ventricular cardiac muscle tissue morphogenesis	biological_process	7	341	26	19037	1.15E-08	1.68E-07	15.03034063	Myh6; Myl3; Tnnc1; Tnni3; Tnnt2; Ly6e; Mybpc3
GO:0002230	positive regulation of defense response to virus by host	biological_process	7	341	27	19037	1.61E-08	2.34E-07	14.47366134	Parp9; Mb21d1; Ptpn22; Ddx58; Pml; Stat1; Dtx3l
GO:0006936	muscle contraction	biological_process	9	341	54	19037	3.55E-08	5.11E-07	9.304496579	Trdn; Myom2; Myh6; Myl3; Actn2; Tnni3; Tnnt2; Mybpc1; Mybpc3
GO:0032727	positive regulation of interferon-alpha production	biological_process	5	341	13	19037	4.88E-08	7.00E-07	21.47191518	Ddx58; Irf7; Zc3hav1; Stat1; Ifih1
GO:0009897	external side of plasma membrane	cellular_component	20	341	288	19037	6.05E-08	8.62E-07	3.876873574	RT1-A2; Cd79b; Osmr; Cd40lg; Klrk1; Fcer2; Kcnj3; Cxcl10; Tnfrsf14; Tnfrsf13b; Tnfrsf13c; Ccr4; Ccr6; Ccr7; Ngfr; Cd5; Cd27; Cd3e; Cd8a; Cd8b
GO:0016779	nucleotidyltransferase activity	molecular_function	6	341	22	19037	7.53E-08	1.07E-06	15.22553986	Oas2; Oas1a; Oas1b; Oas1g; Oas1i; Papd7
GO:0071360	cellular response to exogenous dsRNA	biological_process	5	341	15	19037	1.38E-07	1.94E-06	18.60899316	Mb21d1; Ddx58; Tlr3; Zc3hav1; Ifih1
GO:0003924	GTPase activity	molecular_function	19	341	278	19037	1.56E-07	2.19E-06	3.815512986	RGD1309362; Gch1; RGD1305184; Ifi47; MGC105567; Irgm; Gbp1; Gbp2; Gbp3; Gbp4; Gbp5; Eef1a2; MGC108823; LOC100910979; Mx1; Mx2; Gna14; Mpa2l; Igtp
GO:0035457	cellular response to interferon-alpha	biological_process	5	341	16	19037	2.18E-07	3.03E-06	17.44593109	Oas1a; Mnda; Ifit1; Ifit2; Ifit3
GO:0060048	cardiac muscle contraction	biological_process	8	341	51	19037	2.68E-07	3.70E-06	8.757173251	Myh6; Myl3; Myl4; Tnnc1; Tnni3; Tnnt2; Csrp3; Mybpc3
GO:0032728	positive regulation of interferon-beta production	biological_process	6	341	26	19037	2.73E-07	3.75E-06	12.88314911	Ddx58; Irf1; Irf7; Tlr3; Zc3hav1; Ifih1
GO:0032020	ISG15-protein conjugation	biological_process	3	341	5	19037	4.99E-07	6.62E-06	33.49618768	Isg15; Ube2l6; Uba7
GO:0030899	calcium-dependent ATPase activity	molecular_function	3	341	5	19037	4.99E-07	6.62E-06	33.49618768	Myh6; Atp2b2; Tnnt2
GO:0035549	positive regulation of interferon-beta secretion	biological_process	3	341	5	19037	4.99E-07	6.62E-06	33.49618768	Ptpn22; Ddx58; Ifih1
GO:0020005	symbiont-containing vacuole membrane	cellular_component	3	341	5	19037	4.99E-07	6.62E-06	33.49618768	Gbp1; Gbp2; Gbp4
GO:0031013	troponin I binding	molecular_function	3	341	5	19037	4.99E-07	6.62E-06	33.49618768	Tnnc1; Tnnt2; Tnni3k
GO:0042105	alpha-beta T cell receptor complex	cellular_component	3	341	5	19037	4.99E-07	6.62E-06	33.49618768	Cd3d; Cd3e; Cd3g
GO:0005525	GTP binding	molecular_function	21	341	360	19037	6.27E-07	8.27E-06	3.256573803	RGD1309362; Gch1; Rtkn; RGD1305184; Ifi47; MGC105567; Irgm; Gbp1; Gbp2; Gbp3; Gbp4; Gbp5; Eef1a2; MGC108823; Ifi44l; LOC100910979; Mx1; Mx2; Gna14; Mpa2l; Igtp
GO:0003950	NAD+ ADP-ribosyltransferase activity	molecular_function	5	341	19	19037	7.04E-07	9.24E-06	14.69131039	Parp9; Zc3hav1; Parp10; Parp12; Parp14
GO:0035455	response to interferon-alpha	biological_process	4	341	11	19037	7.57E-07	9.82E-06	20.30071981	Ifitm3; Bst2; Eif2ak2; Adar
GO:0035456	response to interferon-beta	biological_process	4	341	11	19037	7.57E-07	9.82E-06	20.30071981	Ifitm3; Bst2; XAF1; Stat1
GO:0097190	apoptotic signaling pathway	biological_process	8	341	59	19037	9.76E-07	1.26E-05	7.569759928	Ifi27l2b; Ifi27; Tnfrsf14; Daxx; Ngfr; Cd5; Cd27; Cd3e
GO:0034341	response to interferon-gamma	biological_process	6	341	31	19037	1.01E-06	1.30E-05	10.80522183	Gch1; Ifitm3; Bst2; Trim21; LOC500956; Sp100
GO:0060337	type I interferon signaling pathway	biological_process	4	341	12	19037	1.28E-06	1.62E-05	18.60899316	Ifitm3; Oas2; Stat1; Stat2
GO:0005859	muscle myosin complex	cellular_component	4	341	12	19037	1.28E-06	1.62E-05	18.60899316	Myom2; Myh6; Mybpc1; Mybpc3
GO:0002250	adaptive immune response	biological_process	9	341	79	19037	1.44E-06	1.81E-05	6.360035636	Klrk1; RT1-S3; Skap1; Cd3d; Cd3g; Cd8b; Sit1; Camk4; Tap1
GO:0034097	response to cytokine	biological_process	10	341	98	19037	1.45E-06	1.82E-05	5.696630558	Itih4; Trafd1; Osmr; Socs1; Ifi27; Sp100; Pml; XAF1; Stat1; Serpine1
GO:0042270	protection from natural killer cell mediated cytotoxicity	biological_process	3	341	6	19037	1.48E-06	1.83E-05	27.91348974	RT1-S3; Tap1; Serpinb9
GO:0060335	positive regulation of interferon-gamma-mediated signaling pathway	biological_process	3	341	6	19037	1.48E-06	1.83E-05	27.91348974	Parp9; Irgm; Nlrc5
GO:0050896	response to stimulus	biological_process	3	341	7	19037	3.39E-06	4.17E-05	23.92584835	RGD1309808; Apol11a; Apol9a
GO:0044406	adhesion of symbiont to host	biological_process	3	341	7	19037	3.39E-06	4.17E-05	23.92584835	Gbp1; Gbp2; Gbp4
GO:1902187	negative regulation of viral release from host cell	biological_process	4	341	15	19037	4.64E-06	5.67E-05	14.88719453	Trim21; Trim25; Trim5; Pml
GO:0042488	positive regulation of odontogenesis of dentin-containing tooth	biological_process	2	341	3	19037	5.70E-06	6.71E-05	37.21798631	Csf1; Ngfr
GO:0034157	positive regulation of toll-like receptor 7 signaling pathway	biological_process	2	341	3	19037	5.70E-06	6.71E-05	37.21798631	Ptpn22; Rsad2
GO:0043368	positive T cell selection	biological_process	2	341	3	19037	5.70E-06	6.71E-05	37.21798631	Bcl11b; Themis
GO:0003726	double-stranded RNA adenosine deaminase activity	molecular_function	2	341	3	19037	5.70E-06	6.71E-05	37.21798631	Zbp1; Adar
GO:0030172	troponin C binding	molecular_function	2	341	3	19037	5.70E-06	6.71E-05	37.21798631	Tnni3; Tnnt2
GO:0008537	proteasome activator complex	cellular_component	2	341	3	19037	5.70E-06	6.71E-05	37.21798631	Psme1; Psme2
GO:0019884	antigen processing and presentation of exogenous antigen	biological_process	2	341	3	19037	5.70E-06	6.71E-05	37.21798631	Psme1; Psme2
GO:0045214	sarcomere organization	biological_process	6	341	40	19037	6.24E-06	7.31E-05	8.374046921	Myom2; Myh6; Actn2; Tnnt2; Mybpc1; Mybpc3
GO:0071688	striated muscle myosin thick filament assembly	biological_process	3	341	8	19037	6.69E-06	7.68E-05	20.9351173	Myom2; Mybpc1; Mybpc3
GO:0097493	structural molecule activity conferring elasticity	molecular_function	3	341	8	19037	6.69E-06	7.68E-05	20.9351173	Myom2; Mybpc1; Mybpc3
GO:0005861	troponin complex	cellular_component	3	341	8	19037	6.69E-06	7.68E-05	20.9351173	Tnnc1; Tnni3; Tnnt2
GO:2000510	positive regulation of dendritic cell chemotaxis	biological_process	3	341	8	19037	6.69E-06	7.68E-05	20.9351173	Ccr6; Ccr7; Lgals9
GO:0071346	cellular response to interferon-gamma	biological_process	9	341	97	19037	9.43E-06	0.000107735	5.179822838	Ccl12; Irgm; Gbp1; Gbp2; Gbp4; Gbp5; Tlr3; Lgals9; Stat1
GO:1902741	positive regulation of interferon-alpha secretion	biological_process	3	341	9	19037	1.19E-05	0.000134315	18.60899316	Ptpn22; Ddx58; Ifih1
GO:0097512	cardiac myofibril	cellular_component	3	341	9	19037	1.19E-05	0.000134315	18.60899316	Tnni3; Tnnt2; Mybpc3
GO:0044389	ubiquitin-like protein ligase binding	molecular_function	4	341	18	19037	1.27E-05	0.000141899	12.40599544	Parp9; Stat1; Stat2; Dtx3l
GO:0005865	striated muscle thin filament	cellular_component	4	341	18	19037	1.27E-05	0.000141899	12.40599544	Myom2; Tnnt2; Mybpc1; Mybpc3
GO:0090503	RNA phosphodiester bond hydrolysis, exonucleolytic	biological_process	5	341	30	19037	1.31E-05	0.000145549	9.304496579	Pnpt1; LOC103690064; Isg20; LOC100909830; Dcp2
GO:0050830	defense response to Gram-positive bacterium	biological_process	9	341	102	19037	1.48E-05	0.000163751	4.925909953	Rnase2; Defb4; Defb5; Klrk1; RT1-S3; Tnfrsf14; Gbp1; Gbp2; Gbp4
GO:0032753	positive regulation of interleukin-4 production	biological_process	4	341	20	19037	2.23E-05	0.00024253	11.16539589	Cd40lg; RT1-S3; Cd3e; Lgals9
GO:0006471	protein ADP-ribosylation	biological_process	4	341	20	19037	2.23E-05	0.00024253	11.16539589	Parp9; Art2b; Parp10; Parp14
GO:2000566	positive regulation of CD8-positive, alpha-beta T cell proliferation	biological_process	2	341	4	19037	2.25E-05	0.00024253	27.91348974	RT1-S3; Ptpn22
GO:0030578	PML body organization	biological_process	2	341	4	19037	2.25E-05	0.00024253	27.91348974	Daxx; Pml
GO:0046978	TAP1 binding	molecular_function	2	341	4	19037	2.25E-05	0.00024253	27.91348974	Tapbp; Tap1
GO:0046979	TAP2 binding	molecular_function	2	341	4	19037	2.25E-05	0.00024253	27.91348974	Tapbp; Tap1
GO:0006935	chemotaxis	biological_process	7	341	68	19037	2.83E-05	0.000304061	5.746894946	Rnase2; Defb4; Defb5; Cxcl10; Ccr4; Ccr6; Ccr7
GO:0015026	coreceptor activity	molecular_function	4	341	21	19037	2.88E-05	0.000307506	10.63371038	Hfe2; Igsf1; Ramp3; Ngfr
GO:1902715	positive regulation of interferon-gamma secretion	biological_process	3	341	11	19037	3.02E-05	0.000318494	15.22553986	Carmil2; Ptpn22; Lgals9
GO:0019941	modification-dependent protein catabolic process	biological_process	3	341	11	19037	3.02E-05	0.000318494	15.22553986	Isg15; Ube2l6; Uba7
GO:0060340	positive regulation of type I interferon-mediated signaling pathway	biological_process	3	341	11	19037	3.02E-05	0.000318494	15.22553986	Zbp1; Irf7; Nlrc5
GO:0046597	negative regulation of viral entry into host cell	biological_process	4	341	22	19037	3.67E-05	0.000385001	10.1503599	Ifitm3; Trim25; Trim5; Fcnb
GO:0005737	cytoplasm	cellular_component	117	341	4763	19037	4.24E-05	0.000443074	1.371353474	Cmtr1; Itih4; Fabp3; Zap70; Cd79b; Carmil2; Gch1; Dhx58; Smpx; Csdc2; Ifitm3; Pnpt1; Srms; Bst2; Rbfox1; Trim21; Plscr2; Trim25; Trim29; Trim55; Rtn4r; Trim69; Herc6; Rtp4; Isg15; Isg20; RGD1563091; Socs1; Oas2; Oas3; Trim5; Oasl; Upp1; Spats2l; Ubash3a; Parp9; Abtb2; LOC500956; Podnl1; Eif2ak2; Skap1; Nampt; Sbk2; Cldn19; Myh6; Oas1a; Sp100; Ptpn22; Col2a1; Nt5c3a; Jakmip1; Tdrd7; Mlc1; Casp12; …
GO:0045591	positive regulation of regulatory T cell differentiation	biological_process	3	341	12	19037	4.47E-05	0.000460487	13.95674487	Carmil2; Socs1; Lgals9
GO:0042532	negative regulation of tyrosine phosphorylation of STAT protein	biological_process	3	341	12	19037	4.47E-05	0.000460487	13.95674487	Socs1; Irf1; Parp14
GO:0071316	cellular response to nicotine	biological_process	3	341	12	19037	4.47E-05	0.000460487	13.95674487	Col2a1; Kcnj11; Serpine1
GO:0031295	T cell costimulation	biological_process	4	341	23	19037	4.62E-05	0.000467747	9.709039908	Efnb3; Tnfrsf13c; Cd5; Cd3e
GO:0050850	positive regulation of calcium-mediated signaling	biological_process	4	341	23	19037	4.62E-05	0.000467747	9.709039908	Zap70; Trat1; Cd3e; Cd8a
GO:0002026	regulation of the force of heart contraction	biological_process	4	341	23	19037	4.62E-05	0.000467747	9.709039908	Myh6; Myl3; Myl4; Csrp3
GO:0031672	A band	cellular_component	4	341	23	19037	4.62E-05	0.000467747	9.709039908	Myl3; Myl4; Myl7; Mybpc3
GO:0030881	beta-2-microglobulin binding	molecular_function	2	341	5	19037	5.55E-05	0.000526859	22.33079179	RT1-A1; RT1-S3
GO:0033153	T cell receptor V(D)J recombination	biological_process	2	341	5	19037	5.55E-05	0.000526859	22.33079179	Tcf7; Bcl11b
GO:0032649	regulation of interferon-gamma production	biological_process	2	341	5	19037	5.55E-05	0.000526859	22.33079179	Isg15; Ccr7
GO:0030049	muscle filament sliding	biological_process	2	341	5	19037	5.55E-05	0.000526859	22.33079179	Myh6; Tnnt2
GO:0045185	maintenance of protein location	biological_process	2	341	5	19037	5.55E-05	0.000526859	22.33079179	Sp100; Lgals9
GO:0034165	positive regulation of toll-like receptor 9 signaling pathway	biological_process	2	341	5	19037	5.55E-05	0.000526859	22.33079179	Ptpn22; Rsad2
GO:0006942	regulation of striated muscle contraction	biological_process	2	341	5	19037	5.55E-05	0.000526859	22.33079179	Myl3; Mybpc3
GO:0035727	lysophosphatidic acid binding	molecular_function	2	341	5	19037	5.55E-05	0.000526859	22.33079179	Lpar4; Pnpla3
GO:0045351	type I interferon biosynthetic process	biological_process	2	341	5	19037	5.55E-05	0.000526859	22.33079179	Irf7; Irf9
GO:0031014	troponin T binding	molecular_function	2	341	5	19037	5.55E-05	0.000526859	22.33079179	Tnnc1; Tnni3
GO:0097029	mature conventional dendritic cell differentiation	biological_process	2	341	5	19037	5.55E-05	0.000526859	22.33079179	Ccr7; Lgals9
GO:0045345	positive regulation of MHC class I biosynthetic process	biological_process	2	341	5	19037	5.55E-05	0.000526859	22.33079179	Pml; Nlrc5
GO:0051902	negative regulation of mitochondrial depolarization	biological_process	2	341	5	19037	5.55E-05	0.000526859	22.33079179	Ngfr; Hsh2d
GO:1990111	spermatoproteasome complex	cellular_component	2	341	5	19037	5.55E-05	0.000526859	22.33079179	Psmb10; Psmb9
GO:0042825	TAP complex	cellular_component	2	341	5	19037	5.55E-05	0.000526859	22.33079179	Tapbp; Tap1
GO:0042288	MHC class I protein binding	molecular_function	4	341	24	19037	5.75E-05	0.00054403	9.304496579	Klrk1; RT1-S3; RGD1561143; Tap1
GO:0032897	negative regulation of viral transcription	biological_process	3	341	13	19037	6.36E-05	0.000597123	12.88314911	Ifitm3; Trim21; Sp100
GO:0016493	C-C chemokine receptor activity	molecular_function	3	341	13	19037	6.36E-05	0.000597123	12.88314911	Ccr4; Ccr6; Ccr7
GO:0042832	defense response to protozoan	biological_process	4	341	25	19037	7.08E-05	0.000661969	8.932316716	Batf2; Gbp1; Gbp2; Gbp4
GO:0008016	regulation of heart contraction	biological_process	4	341	26	19037	8.64E-05	0.000801131	8.588766073	Myh6; Tnnt2; Hrc; Mybpc3
GO:0098586	cellular response to virus	biological_process	4	341	26	19037	8.64E-05	0.000801131	8.588766073	Irgm; Adar; Lgals9; Psmb9
GO:0045060	negative thymic T cell selection	biological_process	3	341	14	19037	8.78E-05	0.000807772	11.96292417	Zap70; Ccr7; Cd3e
GO:0043508	negative regulation of JUN kinase activity	biological_process	3	341	14	19037	8.78E-05	0.000807772	11.96292417	Dnaja1; Ptpn22; Aida
GO:0008307	structural constituent of muscle	molecular_function	4	341	27	19037	0.000104526	0.000957328	8.270663626	Myom2; Csrp3; Mybpc1; Mybpc3
GO:0008329	signaling pattern recognition receptor activity	molecular_function	2	341	6	19037	0.000109467	0.000983071	18.60899316	Trim5; Fcnb
GO:2001034	positive regulation of double-strand break repair via nonhomologous end joining	biological_process	2	341	6	19037	0.000109467	0.000983071	18.60899316	Parp9; Dtx3l
GO:0060760	positive regulation of response to cytokine stimulus	biological_process	2	341	6	19037	0.000109467	0.000983071	18.60899316	Ddx58; Ifih1
GO:0060333	interferon-gamma-mediated signaling pathway	biological_process	2	341	6	19037	0.000109467	0.000983071	18.60899316	Irf1; Stat1
GO:0019885	antigen processing and presentation of endogenous peptide antigen via MHC class I	biological_process	2	341	6	19037	0.000109467	0.000983071	18.60899316	Tapbp; Tap1
GO:0035563	positive regulation of chromatin binding	biological_process	3	341	15	19037	0.000118104	0.001056528	11.16539589	Ebf2; Parp9; Dtx3l
GO:0031430	M band	cellular_component	4	341	28	19037	0.000125394	0.001117407	7.975282782	Smpx; Myom2; Mybpc1; Mybpc3
GO:0035634	response to stilbenoid	biological_process	3	341	16	19037	0.000155255	0.00136767	10.46755865	Usp18; Fgl1; Ifit3
GO:0070403	NAD+ binding	molecular_function	3	341	16	19037	0.000155255	0.00136767	10.46755865	Parp9; Zc3hav1; Parp14
GO:0051371	muscle alpha-actinin binding	molecular_function	3	341	16	19037	0.000155255	0.00136767	10.46755865	Myom2; Mybpc1; Mybpc3
GO:0072540	T-helper 17 cell lineage commitment	biological_process	2	341	7	19037	0.000189022	0.001615789	15.95056556	Slamf6; Ly9
GO:1900246	positive regulation of RIG-I signaling pathway	biological_process	2	341	7	19037	0.000189022	0.001615789	15.95056556	Dhx58; Zc3hav1
GO:2001200	positive regulation of dendritic cell differentiation	biological_process	2	341	7	19037	0.000189022	0.001615789	15.95056556	Cd40lg; Lgals9
GO:0097677	STAT family protein binding	molecular_function	2	341	7	19037	0.000189022	0.001615789	15.95056556	Parp9; Dtx3l
GO:0045084	positive regulation of interleukin-12 biosynthetic process	biological_process	2	341	7	19037	0.000189022	0.001615789	15.95056556	Irf1; LOC103694381
GO:0003374	dynamin family protein polymerization involved in mitochondrial fission	biological_process	2	341	7	19037	0.000189022	0.001615789	15.95056556	Mx1; Mx2
GO:0048285	organelle fission	biological_process	2	341	7	19037	0.000189022	0.001615789	15.95056556	Mx1; Mx2
GO:0061133	endopeptidase activator activity	molecular_function	2	341	7	19037	0.000189022	0.001615789	15.95056556	Psme1; Psme2
GO:0032496	response to lipopolysaccharide	biological_process	14	341	283	19037	0.000191488	0.001630825	2.761758702	Gch1; Socs1; Eif2ak2; Cxcl10; Ptpn22; Tnfrsf14; Ccr7; Ngfr; Cd6; Cd27; Cnp; Lgals9; Stat1; Serpine1
GO:1904469	positive regulation of tumor necrosis factor secretion	biological_process	3	341	17	19037	0.00020017	0.001698501	9.851819907	Ddx58; Lgals9; Ifih1
GO:0043330	response to exogenous dsRNA	biological_process	4	341	31	19037	0.000207447	0.0017538	7.203481222	Eif2ak2; Ddx58; Tlr3; Stat1
GO:0001916	positive regulation of T cell mediated cytotoxicity	biological_process	3	341	18	19037	0.000253743	0.001878894	9.304496579	RT1-A1; RT1-A2; RT1-S3
GO:0006401	RNA catabolic process	biological_process	3	341	18	19037	0.000253743	0.001878894	9.304496579	Pnpt1; Isg20; Oas2
GO:2000406	positive regulation of T cell migration	biological_process	3	341	18	19037	0.000253743	0.001878894	9.304496579	Cxcl10; Tnfrsf14; Lgals9
GO:0006937	regulation of muscle contraction	biological_process	3	341	18	19037	0.000253743	0.001878894	9.304496579	Tnnc1; Tnni3; Tnnt2
GO:0005164	tumor necrosis factor receptor binding	molecular_function	4	341	33	19037	0.000281393	0.001878894	6.766906603	Cd40lg; LOC103694381; Tnfsf10; Stat1
GO:0051260	protein homooligomerization	biological_process	12	341	231	19037	0.000285575	0.001878894	2.90010283	Cd79b; Gch1; Pnpt1; Kcna2; Kcng2; Kcng4; Gbp1; Cd3d; Cd3e; Cd3g; Capn8; Rnf213
GO:0032729	positive regulation of interferon-gamma production	biological_process	5	341	51	19037	0.000288634	0.001878894	5.473233282	Slamf6; Carmil2; Cd40lg; Klrk1; Cd3e
GO:0042802	identical protein binding	molecular_function	37	341	1172	19037	0.000294496	0.001878894	1.762455837	Cd79b; Bst2; Trim21; Trim29; Trim55; Csf1; Trim5; Eif2ak2; Nampt; Myh6; Sp100; Col2a1; Samhd1; Ddx58; Col23a1; Zbp1; Mlkl; Actn2; Gbp1; Gbp5; Ngfr; Cbs; Cd6; Tlr3; Zp2; Csrp3; Zc3hav1; Apobec2; Tnfsf10; Stat1; Stat2; Col1a2; Mx2; Ifih1; Mybpc3; Psme2; Ifit3
GO:0045953	negative regulation of natural killer cell mediated cytotoxicity	biological_process	2	341	8	19037	0.000298421	0.001878894	13.95674487	RT1-A1; Lgals9
GO:0031731	CCR6 chemokine receptor binding	molecular_function	2	341	8	19037	0.000298421	0.001878894	13.95674487	Defb4; Defb5
GO:0045088	regulation of innate immune response	biological_process	2	341	8	19037	0.000298421	0.001878894	13.95674487	Dhx58; Samhd1
GO:0043462	regulation of ATPase activity	biological_process	2	341	8	19037	0.000298421	0.001878894	13.95674487	Myh6; Tnnc1
GO:0055009	atrial cardiac muscle tissue morphogenesis	biological_process	2	341	8	19037	0.000298421	0.001878894	13.95674487	Myh6; Tnnt2
GO:1903169	regulation of calcium ion transmembrane transport	biological_process	2	341	8	19037	0.000298421	0.001878894	13.95674487	Ptpn22; Hrc
GO:0044214	spanning component of plasma membrane	cellular_component	2	341	8	19037	0.000298421	0.001878894	13.95674487	Cd5; Cd6
GO:0060339	negative regulation of type I interferon-mediated signaling pathway	biological_process	2	341	8	19037	0.000298421	0.001878894	13.95674487	Adar; Nlrc5
GO:0043292	contractile fiber	cellular_component	3	341	19	19037	0.000316891	0.001878894	8.814786232	Smpx; Tnnc1; Tnni3
GO:0004483	mRNA (nucleoside-2'-O-)-methyltransferase activity	molecular_function	1	341	2	19037	0.000319933	0.001878894	27.91348974	Cmtr1
GO:0097309	cap1 mRNA methylation	biological_process	1	341	2	19037	0.000319933	0.001878894	27.91348974	Cmtr1
GO:0070724	BMP receptor complex	cellular_component	1	341	2	19037	0.000319933	0.001878894	27.91348974	Hfe2
GO:0016198	axon choice point recognition	biological_process	1	341	2	19037	0.000319933	0.001878894	27.91348974	Efnb3
GO:0002517	T cell tolerance induction	biological_process	1	341	2	19037	0.000319933	0.001878894	27.91348974	RT1-A1
GO:0002485	antigen processing and presentation of endogenous peptide antigen via MHC class I via ER pathway, TAP-dependent	biological_process	1	341	2	19037	0.000319933	0.001878894	27.91348974	RT1-A2
GO:0070664	negative regulation of leukocyte proliferation	biological_process	1	341	2	19037	0.000319933	0.001878894	27.91348974	Ccl12
GO:1904293	negative regulation of ERAD pathway	biological_process	1	341	2	19037	0.000319933	0.001878894	27.91348974	Usp25
GO:0000706	meiotic DNA double-strand break processing	biological_process	1	341	2	19037	0.000319933	0.001878894	27.91348974	Spo11
GO:1902745	positive regulation of lamellipodium organization	biological_process	1	341	2	19037	0.000319933	0.001878894	27.91348974	Carmil2
GO:0014916	regulation of lung blood pressure	biological_process	1	341	2	19037	0.000319933	0.001878894	27.91348974	Gch1
GO:0005900	oncostatin-M receptor complex	cellular_component	1	341	2	19037	0.000319933	0.001878894	27.91348974	Osmr
GO:0000962	positive regulation of mitochondrial RNA catabolic process	biological_process	1	341	2	19037	0.000319933	0.001878894	27.91348974	Pnpt1
GO:0000963	mitochondrial RNA processing	biological_process	1	341	2	19037	0.000319933	0.001878894	27.91348974	Pnpt1
GO:0000964	mitochondrial RNA 5'-end processing	biological_process	1	341	2	19037	0.000319933	0.001878894	27.91348974	Pnpt1
GO:0000965	mitochondrial RNA 3'-end processing	biological_process	1	341	2	19037	0.000319933	0.001878894	27.91348974	Pnpt1
GO:0045025	mitochondrial degradosome	cellular_component	1	341	2	19037	0.000319933	0.001878894	27.91348974	Pnpt1
GO:2000627	positive regulation of miRNA catabolic process	biological_process	1	341	2	19037	0.000319933	0.001878894	27.91348974	Pnpt1
GO:1901253	negative regulation of intracellular transport of viral material	biological_process	1	341	2	19037	0.000319933	0.001878894	27.91348974	Bst2
GO:1905665	positive regulation of calcium ion import across plasma membrane	biological_process	1	341	2	19037	0.000319933	0.001878894	27.91348974	Ramp3
GO:0090086	negative regulation of protein deubiquitination	biological_process	1	341	2	19037	0.000319933	0.001878894	27.91348974	Trim21
GO:0038145	macrophage colony-stimulating factor signaling pathway	biological_process	1	341	2	19037	0.000319933	0.001878894	27.91348974	Csf1
GO:1990682	CSF1-CSF1R complex	cellular_component	1	341	2	19037	0.000319933	0.001878894	27.91348974	Csf1
GO:0038131	neuregulin receptor activity	molecular_function	1	341	2	19037	0.000319933	0.001878894	27.91348974	Rtn4r
GO:1905573	ganglioside GM1 binding	molecular_function	1	341	2	19037	0.000319933	0.001878894	27.91348974	Rtn4r
GO:0005174	CD40 receptor binding	molecular_function	1	341	2	19037	0.000319933	0.001878894	27.91348974	Cd40lg
GO:0090158	endoplasmic reticulum membrane organization	biological_process	1	341	2	19037	0.000319933	0.001878894	27.91348974	Trdn
GO:0002223	stimulatory C-type lectin receptor signaling pathway	biological_process	1	341	2	19037	0.000319933	0.001878894	27.91348974	Klrk1
GO:2000502	negative regulation of natural killer cell chemotaxis	biological_process	1	341	2	19037	0.000319933	0.001878894	27.91348974	Klrk1
GO:0046416	D-amino acid metabolic process	biological_process	1	341	2	19037	0.000319933	0.001878894	27.91348974	Dao
GO:0070178	D-serine metabolic process	biological_process	1	341	2	19037	0.000319933	0.001878894	27.91348974	Dao
GO:0002476	antigen processing and presentation of endogenous peptide antigen via MHC class Ib	biological_process	1	341	2	19037	0.000319933	0.001878894	27.91348974	RT1-S3
GO:0002489	antigen processing and presentation of endogenous peptide antigen via MHC class Ib via ER pathway, TAP-dependent	biological_process	1	341	2	19037	0.000319933	0.001878894	27.91348974	RT1-S3
GO:0032398	MHC class Ib protein complex	cellular_component	1	341	2	19037	0.000319933	0.001878894	27.91348974	RT1-S3
GO:1990462	omegasome	cellular_component	1	341	2	19037	0.000319933	0.001878894	27.91348974	Trim5
GO:0004850	uridine phosphorylase activity	molecular_function	1	341	2	19037	0.000319933	0.001878894	27.91348974	Upp1
GO:0009166	nucleotide catabolic process	biological_process	1	341	2	19037	0.000319933	0.001878894	27.91348974	Upp1
GO:0021633	optic nerve structural organization	biological_process	1	341	2	19037	0.000319933	0.001878894	27.91348974	Kcna2
GO:1902036	regulation of hematopoietic stem cell differentiation	biological_process	1	341	2	19037	0.000319933	0.001878894	27.91348974	Eif2ak2
GO:1905259	negative regulation of nitrosative stress-induced intrinsic apoptotic signaling pathway	biological_process	1	341	2	19037	0.000319933	0.001878894	27.91348974	Dnaja1
GO:0060420	regulation of heart growth	biological_process	1	341	2	19037	0.000319933	0.001878894	27.91348974	Myh6
GO:1901894	regulation of calcium-transporting ATPase activity	biological_process	1	341	2	19037	0.000319933	0.001878894	27.91348974	Sln
GO:0032817	regulation of natural killer cell proliferation	biological_process	1	341	2	19037	0.000319933	0.001878894	27.91348974	Ptpn22
GO:0097535	lymphoid lineage cell migration into thymus	biological_process	1	341	2	19037	0.000319933	0.001878894	27.91348974	Bcl11b
GO:0065007	biological regulation	biological_process	1	341	2	19037	0.000319933	0.001878894	27.91348974	Jakmip1
GO:0009590	detection of gravity	biological_process	1	341	2	19037	0.000319933	0.001878894	27.91348974	Otop1
GO:0007620	copulation	biological_process	1	341	2	19037	0.000319933	0.001878894	27.91348974	Abat
GO:0009450	gamma-aminobutyric acid catabolic process	biological_process	1	341	2	19037	0.000319933	0.001878894	27.91348974	Abat
GO:0032607	interferon-alpha production	biological_process	1	341	2	19037	0.000319933	0.001878894	27.91348974	Irf7
GO:0032608	interferon-beta production	biological_process	1	341	2	19037	0.000319933	0.001878894	27.91348974	Irf7
GO:0060537	muscle tissue development	biological_process	1	341	2	19037	0.000319933	0.001878894	27.91348974	Srpk3
GO:0004798	thymidylate kinase activity	molecular_function	1	341	2	19037	0.000319933	0.001878894	27.91348974	Cmpk2
GO:0006233	dTDP biosynthetic process	biological_process	1	341	2	19037	0.000319933	0.001878894	27.91348974	Cmpk2
GO:0033862	UMP kinase activity	molecular_function	1	341	2	19037	0.000319933	0.001878894	27.91348974	Cmpk2
GO:0035710	CD4-positive, alpha-beta T cell activation	biological_process	1	341	2	19037	0.000319933	0.001878894	27.91348974	Rsad2
GO:0030343	vitamin D3 25-hydroxylase activity	molecular_function	1	341	2	19037	0.000319933	0.001878894	27.91348974	Cyp27a1
GO:0070080	titin Z domain binding	molecular_function	1	341	2	19037	0.000319933	0.001878894	27.91348974	Actn2
GO:0090218	positive regulation of lipid kinase activity	biological_process	1	341	2	19037	0.000319933	0.001878894	27.91348974	Eef1a2
GO:0072679	thymocyte migration	biological_process	1	341	2	19037	0.000319933	0.001878894	27.91348974	Ccr6
GO:2000319	regulation of T-helper 17 cell differentiation	biological_process	1	341	2	19037	0.000319933	0.001878894	27.91348974	Ccr6
GO:0072610	interleukin-12 secretion	biological_process	1	341	2	19037	0.000319933	0.001878894	27.91348974	Ccr7
GO:0072738	cellular response to diamide	biological_process	1	341	2	19037	0.000319933	0.001878894	27.91348974	Daxx
GO:0002358	B cell homeostatic proliferation	biological_process	1	341	2	19037	0.000319933	0.001878894	27.91348974	Rag2
GO:0035907	dorsal aorta development	biological_process	1	341	2	19037	0.000319933	0.001878894	27.91348974	Ngfr
GO:2001273	regulation of glucose import in response to insulin stimulus	biological_process	1	341	2	19037	0.000319933	0.001878894	27.91348974	Ngfr
GO:0043506	regulation of JUN kinase activity	biological_process	1	341	2	19037	0.000319933	0.001878894	27.91348974	Cbs
GO:0050421	nitrite reductase (NO-forming) activity	molecular_function	1	341	2	19037	0.000319933	0.001878894	27.91348974	Cbs
GO:0000991	transcription factor activity, core RNA polymerase II binding	molecular_function	1	341	2	19037	0.000319933	0.001878894	27.91348974	Gtf2f2
GO:0060638	mesenchymal-epithelial cell signaling	biological_process	1	341	2	19037	0.000319933	0.001878894	27.91348974	Wnt2b
GO:0047710	bis(5'-adenosyl)-triphosphatase activity	molecular_function	1	341	2	19037	0.000319933	0.001878894	27.91348974	Enpp4
GO:0045125	bioactive lipid receptor activity	molecular_function	1	341	2	19037	0.000319933	0.001878894	27.91348974	Gpr174
GO:0031444	slow-twitch skeletal muscle fiber contraction	biological_process	1	341	2	19037	0.000319933	0.001878894	27.91348974	Mb
GO:0016553	base conversion or substitution editing	biological_process	1	341	2	19037	0.000319933	0.001878894	27.91348974	Adar
GO:1903919	negative regulation of actin filament severing	biological_process	1	341	2	19037	0.000319933	0.001878894	27.91348974	Csrp3
GO:0072038	mesenchymal stem cell maintenance involved in nephron morphogenesis	biological_process	1	341	2	19037	0.000319933	0.001878894	27.91348974	Six2
GO:0097168	mesenchymal stem cell proliferation	biological_process	1	341	2	19037	0.000319933	0.001878894	27.91348974	Six2
GO:0002519	natural killer cell tolerance induction	biological_process	1	341	2	19037	0.000319933	0.001878894	27.91348974	Lgals9
GO:0032673	regulation of interleukin-4 production	biological_process	1	341	2	19037	0.000319933	0.001878894	27.91348974	Lgals9
GO:0032674	regulation of interleukin-5 production	biological_process	1	341	2	19037	0.000319933	0.001878894	27.91348974	Lgals9
GO:0032834	positive regulation of CD4-positive, CD25-positive, alpha-beta regulatory T cell differentiation involved in immune response	biological_process	1	341	2	19037	0.000319933	0.001878894	27.91348974	Lgals9
GO:0048030	disaccharide binding	molecular_function	1	341	2	19037	0.000319933	0.001878894	27.91348974	Lgals9
GO:2000316	regulation of T-helper 17 type immune response	biological_process	1	341	2	19037	0.000319933	0.001878894	27.91348974	Lgals9
GO:2001190	positive regulation of T cell activation via T cell receptor contact with antigen bound to MHC molecule on antigen presenting cell	biological_process	1	341	2	19037	0.000319933	0.001878894	27.91348974	Lgals9
GO:1901899	positive regulation of relaxation of cardiac muscle	biological_process	1	341	2	19037	0.000319933	0.001878894	27.91348974	Hrc
GO:0046725	negative regulation by virus of viral protein levels in host cell	biological_process	1	341	2	19037	0.000319933	0.001878894	27.91348974	Stat1
GO:0061326	renal tubule development	biological_process	1	341	2	19037	0.000319933	0.001878894	27.91348974	Stat1
GO:0005584	collagen type I trimer	cellular_component	1	341	2	19037	0.000319933	0.001878894	27.91348974	Col1a2
GO:0010847	regulation of chromatin assembly	biological_process	1	341	2	19037	0.000319933	0.001878894	27.91348974	Parp10
GO:1900045	negative regulation of protein K63-linked ubiquitination	biological_process	1	341	2	19037	0.000319933	0.001878894	27.91348974	Parp10
GO:1902216	positive regulation of interleukin-4-mediated signaling pathway	biological_process	1	341	2	19037	0.000319933	0.001878894	27.91348974	Parp14
GO:0005863	striated muscle myosin thick filament	cellular_component	1	341	2	19037	0.000319933	0.001878894	27.91348974	Mybpc3
GO:0001791	IgM binding	molecular_function	1	341	2	19037	0.000319933	0.001878894	27.91348974	Cd300lg
GO:0015433	peptide antigen-transporting ATPase activity	molecular_function	1	341	2	19037	0.000319933	0.001878894	27.91348974	Tap1
GO:0046967	cytosol to ER transport	biological_process	1	341	2	19037	0.000319933	0.001878894	27.91348974	Tap1
GO:0046968	peptide antigen transport	biological_process	1	341	2	19037	0.000319933	0.001878894	27.91348974	Tap1
GO:0046980	tapasin binding	molecular_function	1	341	2	19037	0.000319933	0.001878894	27.91348974	Tap1
GO:0002448	mast cell mediated immunity	biological_process	1	341	2	19037	0.000319933	0.001878894	27.91348974	Serpinb9
GO:0006480	N-terminal protein amino acid methylation	biological_process	1	341	2	19037	0.000319933	0.001878894	27.91348974	Mettl11b
GO:0071885	N-terminal protein N-methyltransferase activity	molecular_function	1	341	2	19037	0.000319933	0.001878894	27.91348974	Mettl11b
GO:0001300	chronological cell aging	biological_process	1	341	2	19037	0.000319933	0.001878894	27.91348974	Serpine1
GO:0071258	cellular response to gravity	biological_process	1	341	2	19037	0.000319933	0.001878894	27.91348974	Serpine1
GO:1904639	cellular response to resveratrol	biological_process	1	341	2	19037	0.000319933	0.001878894	27.91348974	Serpine1
GO:2000098	negative regulation of smooth muscle cell-matrix adhesion	biological_process	1	341	2	19037	0.000319933	0.001878894	27.91348974	Serpine1
GO:0001772	immunological synapse	cellular_component	4	341	34	19037	0.000325109	0.001904447	6.567879938	Zap70; Carmil2; Cd6; Cd3e
GO:0004860	protein kinase inhibitor activity	molecular_function	5	341	53	19037	0.000357062	0.002080623	5.266696177	Rtn4r; Socs1; Podnl1; LOC100912218; Lrrc4
GO:0006954	inflammatory response	biological_process	14	341	300	19037	0.000357453	0.002080623	2.605259042	Ccl12; Csf1; Cd40lg; Hrh1; Cxcl10; Tnfrsf14; Ccr4; Ccr7; Ngfr; Cd6; Cd27; Cd8a; Lgals9; Camk4
GO:0050852	T cell receptor signaling pathway	biological_process	6	341	74	19037	0.000357889	0.002080623	4.526511849	Zap70; Carmil2; Skap1; Ptpn22; Themis; Cd3e
GO:0051770	positive regulation of nitric-oxide synthase biosynthetic process	biological_process	3	341	20	19037	0.000390551	0.002259126	8.374046921	Fcer2; Nampt; Stat1
GO:0005031	tumor necrosis factor-activated receptor activity	molecular_function	3	341	20	19037	0.000390551	0.002259126	8.374046921	Tnfrsf14; Ngfr; Cd27
GO:0002027	regulation of heart rate	biological_process	4	341	36	19037	0.000427757	0.002468157	6.202997719	Myh6; Tnni3k; Hrc; Mybpc3
GO:0070206	protein trimerization	biological_process	2	341	9	19037	0.000441696	0.002529614	12.40599544	Trim21; Trim5
GO:0032982	myosin filament	cellular_component	2	341	9	19037	0.000441696	0.002529614	12.40599544	Myh6; Mybpc1
GO:0070233	negative regulation of T cell apoptotic process	biological_process	2	341	9	19037	0.000441696	0.002529614	12.40599544	Cd27; Serpinb9
GO:0006919	activation of cysteine-type endopeptidase activity involved in apoptotic process	biological_process	6	341	77	19037	0.000456885	0.002610125	4.350154245	Ifi27l2b; Ifi27; Casp12; Pml; Ngfr; Stat1
GO:0009986	cell surface	cellular_component	23	341	632	19037	0.00047239	0.002692038	2.03167805	Hfe2; Ifitm3; Bst2; Ramp3; Rtn4r; Cd40lg; Rtp4; Klrk1; RT1-S3; Ly9; Kcnj3; Kcnk2; Vcan; Col23a1; Havcr1; Ccr6; Ccr7; Ngfr; Cd27; Tlr3; Cd8a; Cd8b; Clstn3
GO:0050860	negative regulation of T cell receptor signaling pathway	biological_process	3	341	21	19037	0.000475674	0.002704076	7.975282782	Ubash3a; Ptpn22; Gbp1
GO:0030017	sarcomere	cellular_component	4	341	38	19037	0.000553107	0.00313654	5.876524155	Actn2; Tnni3; Tnnt2; Mybpc3
GO:0030278	regulation of ossification	biological_process	3	341	22	19037	0.000573224	0.003242647	7.612769928	Csf1; Rsad2; Six2
GO:0050829	defense response to Gram-negative bacterium	biological_process	6	341	80	19037	0.000576593	0.003253734	4.18702346	Rnase2; Defb4; Defb5; Tnfrsf14; Irgm; Serpine1
GO:0019829	cation-transporting ATPase activity	molecular_function	2	341	10	19037	0.000622634	0.003446138	11.16539589	Atp13a5; Atp2b2
GO:0046641	positive regulation of alpha-beta T cell proliferation	biological_process	2	341	10	19037	0.000622634	0.003446138	11.16539589	Zap70; Cd3e
GO:0045141	meiotic telomere clustering	biological_process	2	341	10	19037	0.000622634	0.003446138	11.16539589	Spo11; Majin
GO:0046598	positive regulation of viral entry into host cell	biological_process	2	341	10	19037	0.000622634	0.003446138	11.16539589	Trim21; Lgals9
GO:0060351	cartilage development involved in endochondral bone morphogenesis	biological_process	2	341	10	19037	0.000622634	0.003446138	11.16539589	Col2a1; Cbs
GO:0061635	regulation of protein complex stability	biological_process	2	341	10	19037	0.000622634	0.003446138	11.16539589	Irgm; Tapbp
GO:0032183	SUMO binding	molecular_function	2	341	10	19037	0.000622634	0.003446138	11.16539589	Daxx; Pml
GO:0010950	positive regulation of endopeptidase activity	biological_process	2	341	10	19037	0.000622634	0.003446138	11.16539589	Psme1; Psme2
GO:0032722	positive regulation of chemokine production	biological_process	3	341	23	19037	0.000684174	0.00377769	7.281779931	Eif2ak2; Tlr3; Lgals9
GO:0005524	ATP binding	molecular_function	40	341	1365	19037	0.000792155	0.004201286	1.635955442	Atp13a5; Zap70; Spo11; Dhx58; Srms; Oas2; Oas3; Oasl; Eif2ak2; Sbk2; Sbk3; Dnaja1; Myh6; Oas1a; Oas1b; Oas1g; Oas1i; Ddx3y; Ddx58; Clcn4; Srpk3; Mlkl; Slfn2; Slfn4; Slfn5; Atad1; Ube2l6; Uba7; Ascc3; Kcnj11; Gtf2f2; Atp2b2; Ckm; Tnni3k; Tor3a; Camk4; Ifih1; Oasl2; Tap1; Nlrc5
GO:0005540	hyaluronic acid binding	molecular_function	3	341	24	19037	0.000809506	0.004201286	6.978372434	Itih4; Acan; Vcan
GO:0031640	killing of cells of other organism	biological_process	3	341	24	19037	0.000809506	0.004201286	6.978372434	Ccl12; Defb4; Defb5
GO:0045059	positive thymic T cell selection	biological_process	2	341	11	19037	0.000844789	0.004201286	10.1503599	Zap70; Cd3d
GO:0046632	alpha-beta T cell differentiation	biological_process	2	341	11	19037	0.000844789	0.004201286	10.1503599	Tcf7; Bcl11b
GO:0048739	cardiac muscle fiber development	biological_process	2	341	11	19037	0.000844789	0.004201286	10.1503599	Myom2; Myh6
GO:0050862	positive regulation of T cell receptor signaling pathway	biological_process	2	341	11	19037	0.000844789	0.004201286	10.1503599	Trat1; Ccr7
GO:0048407	platelet-derived growth factor binding	molecular_function	2	341	11	19037	0.000844789	0.004201286	10.1503599	Col2a1; Col1a2
GO:0045078	positive regulation of interferon-gamma biosynthetic process	biological_process	2	341	11	19037	0.000844789	0.004201286	10.1503599	Tnfrsf13c; Tlr3
GO:0071359	cellular response to dsRNA	biological_process	2	341	11	19037	0.000844789	0.004201286	10.1503599	Irf1; Tlr3
GO:0032780	negative regulation of ATPase activity	biological_process	2	341	11	19037	0.000844789	0.004201286	10.1503599	Tnni3; Tnnt2
GO:0034138	toll-like receptor 3 signaling pathway	biological_process	2	341	11	19037	0.000844789	0.004201286	10.1503599	Tlr3; Lgals9
GO:0070538	oleic acid binding	molecular_function	1	341	3	19037	0.000948404	0.004201286	18.60899316	Fabp3
GO:0043366	beta selection	biological_process	1	341	3	19037	0.000948404	0.004201286	18.60899316	Zap70
GO:0001787	natural killer cell proliferation	biological_process	1	341	3	19037	0.000948404	0.004201286	18.60899316	Slamf6
GO:0003918	DNA topoisomerase type II (ATP-hydrolyzing) activity	molecular_function	1	341	3	19037	0.000948404	0.004201286	18.60899316	Spo11
GO:1990918	double-strand break repair involved in meiotic recombination	biological_process	1	341	3	19037	0.000948404	0.004201286	18.60899316	Spo11
GO:2000813	negative regulation of barbed-end actin filament capping	biological_process	1	341	3	19037	0.000948404	0.004201286	18.60899316	Carmil2
GO:1900245	positive regulation of MDA-5 signaling pathway	biological_process	1	341	3	19037	0.000948404	0.004201286	18.60899316	Dhx58
GO:0072534	perineuronal net	cellular_component	1	341	3	19037	0.000948404	0.004201286	18.60899316	Acan
GO:0004924	oncostatin-M receptor activity	molecular_function	1	341	3	19037	0.000948404	0.004201286	18.60899316	Osmr
GO:0000958	mitochondrial mRNA catabolic process	biological_process	1	341	3	19037	0.000948404	0.004201286	18.60899316	Pnpt1
GO:0035928	rRNA import into mitochondrion	biological_process	1	341	3	19037	0.000948404	0.004201286	18.60899316	Pnpt1
GO:0000254	C-4 methylsterol oxidase activity	molecular_function	1	341	3	19037	0.000948404	0.004201286	18.60899316	Faxdc2
GO:1903143	adrenomedullin receptor complex	cellular_component	1	341	3	19037	0.000948404	0.004201286	18.60899316	Ramp3
GO:0032185	septin cytoskeleton organization	biological_process	1	341	3	19037	0.000948404	0.004201286	18.60899316	Rtkn
GO:0002158	osteoclast proliferation	biological_process	1	341	3	19037	0.000948404	0.004201286	18.60899316	Csf1
GO:0005157	macrophage colony-stimulating factor receptor binding	molecular_function	1	341	3	19037	0.000948404	0.004201286	18.60899316	Csf1
GO:1905576	ganglioside GT1b binding	molecular_function	1	341	3	19037	0.000948404	0.004201286	18.60899316	Rtn4r
GO:0002839	positive regulation of immune response to tumor cell	biological_process	1	341	3	19037	0.000948404	0.004201286	18.60899316	Cd40lg
GO:0010649	regulation of cell communication by electrical coupling	biological_process	1	341	3	19037	0.000948404	0.004201286	18.60899316	Trdn
GO:0014701	junctional sarcoplasmic reticulum membrane	cellular_component	1	341	3	19037	0.000948404	0.004201286	18.60899316	Trdn
GO:0006551	leucine metabolic process	biological_process	1	341	3	19037	0.000948404	0.004201286	18.60899316	Dao
GO:0006562	proline catabolic process	biological_process	1	341	3	19037	0.000948404	0.004201286	18.60899316	Dao
GO:0060334	regulation of interferon-gamma-mediated signaling pathway	biological_process	1	341	3	19037	0.000948404	0.004201286	18.60899316	Socs1
GO:0006220	pyrimidine nucleotide metabolic process	biological_process	1	341	3	19037	0.000948404	0.004201286	18.60899316	Upp1
GO:0045586	regulation of gamma-delta T cell differentiation	biological_process	1	341	3	19037	0.000948404	0.004201286	18.60899316	Egr3
GO:1902033	regulation of hematopoietic stem cell proliferation	biological_process	1	341	3	19037	0.000948404	0.004201286	18.60899316	Eif2ak2
GO:0019677	NAD catabolic process	biological_process	1	341	3	19037	0.000948404	0.004201286	18.60899316	Art2b
GO:0002757	immune response-activating signal transduction	biological_process	1	341	3	19037	0.000948404	0.004201286	18.60899316	Skap1
GO:0004514	nicotinate-nucleotide diphosphorylase (carboxylating) activity	molecular_function	1	341	3	19037	0.000948404	0.004201286	18.60899316	Nampt
GO:0043114	regulation of vascular permeability	biological_process	1	341	3	19037	0.000948404	0.004201286	18.60899316	Hrh1
GO:1903748	negative regulation of establishment of protein localization to mitochondrion	biological_process	1	341	3	19037	0.000948404	0.004201286	18.60899316	Dnaja1
GO:1901740	negative regulation of myoblast fusion	biological_process	1	341	3	19037	0.000948404	0.004201286	18.60899316	Cxcl10
GO:1901077	regulation of relaxation of muscle	biological_process	1	341	3	19037	0.000948404	0.004201286	18.60899316	Sln
GO:0002685	regulation of leukocyte migration	biological_process	1	341	3	19037	0.000948404	0.004201286	18.60899316	Ptpn22
GO:0070433	negative regulation of nucleotide-binding oligomerization domain containing 2 signaling pathway	biological_process	1	341	3	19037	0.000948404	0.004201286	18.60899316	Ptpn22
GO:0071663	positive regulation of granzyme B production	biological_process	1	341	3	19037	0.000948404	0.004201286	18.60899316	Ptpn22
GO:1902523	positive regulation of protein K63-linked ubiquitination	biological_process	1	341	3	19037	0.000948404	0.004201286	18.60899316	Ptpn22
GO:0051051	negative regulation of transport	biological_process	1	341	3	19037	0.000948404	0.004201286	18.60899316	Trat1
GO:0021773	striatal medium spiny neuron differentiation	biological_process	1	341	3	19037	0.000948404	0.004201286	18.60899316	Bcl11b
GO:0006203	dGTP catabolic process	biological_process	1	341	3	19037	0.000948404	0.004201286	18.60899316	Samhd1
GO:0046061	dATP catabolic process	biological_process	1	341	3	19037	0.000948404	0.004201286	18.60899316	Samhd1
GO:0034059	response to anoxia	biological_process	1	341	3	19037	0.000948404	0.004201286	18.60899316	Casp12
GO:0039529	RIG-I signaling pathway	biological_process	1	341	3	19037	0.000948404	0.004201286	18.60899316	Ddx58
GO:0070292	N-acylphosphatidylethanolamine metabolic process	biological_process	1	341	3	19037	0.000948404	0.004201286	18.60899316	Cmah
GO:0009449	gamma-aminobutyric acid biosynthetic process	biological_process	1	341	3	19037	0.000948404	0.004201286	18.60899316	Abat
GO:1902722	positive regulation of prolactin secretion	biological_process	1	341	3	19037	0.000948404	0.004201286	18.60899316	Abat
GO:0061762	CAMKK-AMPK signaling cascade	biological_process	1	341	3	19037	0.000948404	0.004201286	18.60899316	Irgm
GO:0006227	dUDP biosynthetic process	biological_process	1	341	3	19037	0.000948404	0.004201286	18.60899316	Cmpk2
GO:0009041	uridylate kinase activity	molecular_function	1	341	3	19037	0.000948404	0.004201286	18.60899316	Cmpk2
GO:0086097	phospholipase C-activating angiotensin-activated signaling pathway	biological_process	1	341	3	19037	0.000948404	0.004201286	18.60899316	Actn2
GO:0019002	GMP binding	molecular_function	1	341	3	19037	0.000948404	0.004201286	18.60899316	Gbp1
GO:0002086	diaphragm contraction	biological_process	1	341	3	19037	0.000948404	0.004201286	18.60899316	Tnnc1
GO:0005853	eukaryotic translation elongation factor 1 complex	cellular_component	1	341	3	19037	0.000948404	0.004201286	18.60899316	Eef1a2
GO:0002507	tolerance induction	biological_process	1	341	3	19037	0.000948404	0.004201286	18.60899316	Ccr4
GO:0002408	myeloid dendritic cell chemotaxis	biological_process	1	341	3	19037	0.000948404	0.004201286	18.60899316	Ccr7
GO:0050706	regulation of interleukin-1 beta secretion	biological_process	1	341	3	19037	0.000948404	0.004201286	18.60899316	Ccr7
GO:0071454	cellular response to anoxia	biological_process	1	341	3	19037	0.000948404	0.004201286	18.60899316	Daxx
GO:0002331	pre-B cell allelic exclusion	biological_process	1	341	3	19037	0.000948404	0.004201286	18.60899316	Rag2
GO:0042296	ISG15 transferase activity	molecular_function	1	341	3	19037	0.000948404	0.004201286	18.60899316	Ube2l6
GO:0050711	negative regulation of interleukin-1 secretion	biological_process	1	341	3	19037	0.000948404	0.004201286	18.60899316	Pml
GO:1904816	positive regulation of protein localization to chromosome, telomeric region	biological_process	1	341	3	19037	0.000948404	0.004201286	18.60899316	Pml
GO:0051799	negative regulation of hair follicle development	biological_process	1	341	3	19037	0.000948404	0.004201286	18.60899316	Ngfr
GO:0070678	preprotein binding	molecular_function	1	341	3	19037	0.000948404	0.004201286	18.60899316	Ngfr
GO:0099053	activating signal cointegrator 1 complex	cellular_component	1	341	3	19037	0.000948404	0.004201286	18.60899316	Ascc3
GO:0019343	cysteine biosynthetic process via cystathionine	biological_process	1	341	3	19037	0.000948404	0.004201286	18.60899316	Cbs
GO:0019344	cysteine biosynthetic process	biological_process	1	341	3	19037	0.000948404	0.004201286	18.60899316	Cbs
GO:0019448	L-cysteine catabolic process	biological_process	1	341	3	19037	0.000948404	0.004201286	18.60899316	Cbs
GO:0043418	homocysteine catabolic process	biological_process	1	341	3	19037	0.000948404	0.004201286	18.60899316	Cbs
GO:0070814	hydrogen sulfide biosynthetic process	biological_process	1	341	3	19037	0.000948404	0.004201286	18.60899316	Cbs
GO:0046649	lymphocyte activation	biological_process	1	341	3	19037	0.000948404	0.004201286	18.60899316	Cd3e
GO:0060492	lung induction	biological_process	1	341	3	19037	0.000948404	0.004201286	18.60899316	Wnt2b
GO:0021692	cerebellar Purkinje cell layer morphogenesis	biological_process	1	341	3	19037	0.000948404	0.004201286	18.60899316	Atp2b2
GO:0043331	response to dsRNA	biological_process	1	341	3	19037	0.000948404	0.004201286	18.60899316	Tlr3
GO:0004534	5'-3' exoribonuclease activity	molecular_function	1	341	3	19037	0.000948404	0.004201286	18.60899316	Dcp2
GO:0030551	cyclic nucleotide binding	molecular_function	1	341	3	19037	0.000948404	0.004201286	18.60899316	Cnp
GO:0072161	mesenchymal cell differentiation involved in kidney development	biological_process	1	341	3	19037	0.000948404	0.004201286	18.60899316	Six2
GO:0042824	MHC class I peptide loading complex	cellular_component	1	341	3	19037	0.000948404	0.004201286	18.60899316	Tapbp
GO:0021914	negative regulation of smoothened signaling pathway involved in ventral spinal cord patterning	biological_process	1	341	3	19037	0.000948404	0.004201286	18.60899316	Rfx4
GO:0032823	regulation of natural killer cell differentiation	biological_process	1	341	3	19037	0.000948404	0.004201286	18.60899316	Lgals9
GO:1902081	negative regulation of calcium ion import into sarcoplasmic reticulum	biological_process	1	341	3	19037	0.000948404	0.004201286	18.60899316	Hrc
GO:0004082	bisphosphoglycerate mutase activity	molecular_function	1	341	3	19037	0.000948404	0.004201286	18.60899316	Pgam2
GO:0004619	phosphoglycerate mutase activity	molecular_function	1	341	3	19037	0.000948404	0.004201286	18.60899316	Pgam2
GO:0046538	2,3-bisphosphoglycerate-dependent phosphoglycerate mutase activity	molecular_function	1	341	3	19037	0.000948404	0.004201286	18.60899316	Pgam2
GO:0008296	3'-5'-exodeoxyribonuclease activity	molecular_function	1	341	3	19037	0.000948404	0.004201286	18.60899316	Trex1
GO:0031034	myosin filament assembly	biological_process	1	341	3	19037	0.000948404	0.004201286	18.60899316	Mybpc3
GO:0008200	ion channel inhibitor activity	molecular_function	1	341	3	19037	0.000948404	0.004201286	18.60899316	Stoml1
GO:0010909	positive regulation of heparan sulfate proteoglycan biosynthetic process	biological_process	1	341	3	19037	0.000948404	0.004201286	18.60899316	Pxylp1
GO:1901666	positive regulation of NAD+ ADP-ribosyltransferase activity	biological_process	1	341	3	19037	0.000948404	0.004201286	18.60899316	Dtx3l
GO:0023029	MHC class Ib protein binding	molecular_function	1	341	3	19037	0.000948404	0.004201286	18.60899316	Tap1
GO:1904680	peptide transmembrane transporter activity	molecular_function	1	341	3	19037	0.000948404	0.004201286	18.60899316	Tap1
GO:0042583	chromaffin granule	cellular_component	1	341	3	19037	0.000948404	0.004201286	18.60899316	Serpine1
GO:0032735	positive regulation of interleukin-12 production	biological_process	3	341	25	19037	0.000950204	0.004201286	6.699237537	Cd40lg; Ccr7; Tlr3
GO:0003723	RNA binding	molecular_function	18	341	477	19037	0.00104367	0.004605716	2.106678471	Csdc2; LOC103690064; Rbfox1; LOC500956; Marf1; Ifit1bl; Samhd1; Jakmip1; Zbp1; LOC100909830; Dcp2; Cnp; Adar; Apobec2; Rbm43; Ifit1; Ifit2; Ifit3
GO:0042803	protein homodimerization activity	molecular_function	29	341	914	19037	0.001069547	0.004710908	1.771315541	Cd79b; Gch1; Bst2; Csf1; Klrk1; Trim5; Nrn1; Nampt; Myh6; Sp100; Col23a1; Abat; Actn2; Gbp1; Tnnc1; Daxx; Aox2; Pml; Ngfr; Cbs; Cd3d; Cd3e; Cd3g; Cd8a; Stat1; Mitd1; Trex1; Ano2; Tap1
GO:0009617	response to bacterium	biological_process	4	341	44	19037	0.001096298	0.004819536	5.075179952	Sp110; Ccr4; Stat1; Serpinb9
GO:0032740	positive regulation of interleukin-17 production	biological_process	2	341	12	19037	0.001111488	0.004849366	9.304496579	Slamf6; Ly9
GO:0097153	cysteine-type endopeptidase activity involved in apoptotic process	molecular_function	2	341	12	19037	0.001111488	0.004849366	9.304496579	Casp12; Casp7
GO:0097200	cysteine-type endopeptidase activity involved in execution phase of apoptosis	molecular_function	2	341	12	19037	0.001111488	0.004849366	9.304496579	Casp12; Casp7
GO:0002438	acute inflammatory response to antigenic stimulus	biological_process	2	341	12	19037	0.001111488	0.004849366	9.304496579	Cd6; Serpinb9
GO:0046426	negative regulation of JAK-STAT cascade	biological_process	4	341	45	19037	0.00121548	0.00529307	4.962398175	Rtn4r; Socs1; Podnl1; Lrrc4
GO:0035025	positive regulation of Rho protein signal transduction	biological_process	3	341	27	19037	0.001281641	0.005549771	6.202997719	Rtn4r; Lpar4; Ngfr
GO:1900182	positive regulation of protein localization to nucleus	biological_process	3	341	27	19037	0.001281641	0.005549771	6.202997719	Parp9; Ngfr; Dtx3l
GO:2000778	positive regulation of interleukin-6 secretion	biological_process	3	341	27	19037	0.001281641	0.005549771	6.202997719	Ddx58; Lgals9; Ifih1
GO:0005201	extracellular matrix structural constituent	molecular_function	4	341	46	19037	0.001343974	0.005808788	4.854519954	Acan; Vcan; Col2a1; Col1a2
GO:0042102	positive regulation of T cell proliferation	biological_process	5	341	68	19037	0.001360285	0.005868293	4.104924961	Carmil2; Cd40lg; Tnfrsf13c; Cd6; Cd3e
GO:0045824	negative regulation of innate immune response	biological_process	2	341	13	19037	0.001425841	0.006082886	8.588766073	Trafd1; Dhx58
GO:0042416	dopamine biosynthetic process	biological_process	2	341	13	19037	0.001425841	0.006082886	8.588766073	Gch1; Dao
GO:0061014	positive regulation of mRNA catabolic process	biological_process	2	341	13	19037	0.001425841	0.006082886	8.588766073	Pnpt1; Zc3hav1
GO:0015271	outward rectifier potassium channel activity	molecular_function	2	341	13	19037	0.001425841	0.006082886	8.588766073	Kcna2; Kcnk2
GO:0003334	keratinocyte development	biological_process	2	341	13	19037	0.001425841	0.006082886	8.588766073	Bcl11b; Krt2
GO:2001259	positive regulation of cation channel activity	biological_process	2	341	13	19037	0.001425841	0.006082886	8.588766073	Actn2; Kcnj11
GO:0016529	sarcoplasmic reticulum	cellular_component	4	341	47	19037	0.001482217	0.006288522	4.751232296	Fabp3; Trdn; Sln; Hrc
GO:0030016	myofibril	cellular_component	4	341	47	19037	0.001482217	0.006288522	4.751232296	Myh6; Tnni3; Tnnt2; Mybpc3
GO:0033209	tumor necrosis factor-mediated signaling pathway	biological_process	4	341	47	19037	0.001482217	0.006288522	4.751232296	Tnfrsf14; Ngfr; Cd27; Stat1
GO:0032757	positive regulation of interleukin-8 production	biological_process	3	341	29	19037	0.001686356	0.006655276	5.775204773	Ddx58; Tlr3; Serpine1
GO:0006874	cellular calcium ion homeostasis	biological_process	6	341	96	19037	0.001696759	0.006655276	3.489186217	Atp13a5; Ccl12; Trdn; Tnni3; Atp2b2; Csrp3
GO:0005388	calcium-transporting ATPase activity	molecular_function	2	341	14	19037	0.001790749	0.006655276	7.975282782	Atp13a5; Atp2b2
GO:0060444	branching involved in mammary gland duct morphogenesis	biological_process	2	341	14	19037	0.001790749	0.006655276	7.975282782	Csf1; Pml
GO:0055003	cardiac myofibril assembly	biological_process	2	341	14	19037	0.001790749	0.006655276	7.975282782	Myom2; Csrp3
GO:0043186	P granule	cellular_component	2	341	14	19037	0.001790749	0.006655276	7.975282782	Tdrd7; Piwil4
GO:0030194	positive regulation of blood coagulation	biological_process	2	341	14	19037	0.001790749	0.006655276	7.975282782	Enpp4; Serpine1
GO:0033130	acetylcholine receptor binding	molecular_function	2	341	14	19037	0.001790749	0.006655276	7.975282782	Atp2b2; Ly6e
GO:0031727	CCR2 chemokine receptor binding	molecular_function	1	341	4	19037	0.00187432	0.006655276	13.95674487	Ccl12
GO:0036041	long-chain fatty acid binding	molecular_function	1	341	4	19037	0.00187432	0.006655276	13.95674487	Fabp3
GO:0046320	regulation of fatty acid oxidation	biological_process	1	341	4	19037	0.00187432	0.006655276	13.95674487	Fabp3
GO:0042138	meiotic DNA double-strand break formation	biological_process	1	341	4	19037	0.00187432	0.006655276	13.95674487	Spo11
GO:0030538	embryonic genitalia morphogenesis	biological_process	1	341	4	19037	0.00187432	0.006655276	13.95674487	Tcf7
GO:0048619	embryonic hindgut morphogenesis	biological_process	1	341	4	19037	0.00187432	0.006655276	13.95674487	Tcf7
GO:0039534	negative regulation of MDA-5 signaling pathway	biological_process	1	341	4	19037	0.00187432	0.006655276	13.95674487	Dhx58
GO:0038165	oncostatin-M-mediated signaling pathway	biological_process	1	341	4	19037	0.00187432	0.006655276	13.95674487	Osmr
GO:0043631	RNA polyadenylation	biological_process	1	341	4	19037	0.00187432	0.006655276	13.95674487	Pnpt1
GO:0071042	nuclear polyadenylation-dependent mRNA catabolic process	biological_process	1	341	4	19037	0.00187432	0.006655276	13.95674487	Pnpt1
GO:0001605	adrenomedullin receptor activity	molecular_function	1	341	4	19037	0.00187432	0.006655276	13.95674487	Ramp3
GO:0097643	amylin receptor activity	molecular_function	1	341	4	19037	0.00187432	0.006655276	13.95674487	Ramp3
GO:1903440	amylin receptor complex	cellular_component	1	341	4	19037	0.00187432	0.006655276	13.95674487	Ramp3
GO:1990410	adrenomedullin receptor signaling pathway	biological_process	1	341	4	19037	0.00187432	0.006655276	13.95674487	Ramp3
GO:0046596	regulation of viral entry into host cell	biological_process	1	341	4	19037	0.00187432	0.006655276	13.95674487	Trim25
GO:1902186	regulation of viral release from host cell	biological_process	1	341	4	19037	0.00187432	0.006655276	13.95674487	Trim25
GO:0031106	septin ring organization	biological_process	1	341	4	19037	0.00187432	0.006655276	13.95674487	Rtkn
GO:1904498	protein localization to mitotic actomyosin contractile ring	biological_process	1	341	4	19037	0.00187432	0.006655276	13.95674487	Rtkn
GO:0032946	positive regulation of mononuclear cell proliferation	biological_process	1	341	4	19037	0.00187432	0.006655276	13.95674487	Csf1
GO:0000738	DNA catabolic process, exonucleolytic	biological_process	1	341	4	19037	0.00187432	0.006655276	13.95674487	Isg20
GO:0008310	single-stranded DNA 3'-5' exodeoxyribonuclease activity	molecular_function	1	341	4	19037	0.00187432	0.006655276	13.95674487	Isg20
GO:0051712	positive regulation of killing of cells of other organism	biological_process	1	341	4	19037	0.00187432	0.006655276	13.95674487	Fcer2
GO:0031664	regulation of lipopolysaccharide-mediated signaling pathway	biological_process	1	341	4	19037	0.00187432	0.006655276	13.95674487	Trim5
GO:0090734	site of DNA damage	cellular_component	1	341	4	19037	0.00187432	0.006655276	13.95674487	Parp9
GO:0045188	regulation of circadian sleep/wake cycle, non-REM sleep	biological_process	1	341	4	19037	0.00187432	0.006655276	13.95674487	Kcna2
GO:0004694	eukaryotic translation initiation factor 2alpha kinase activity	molecular_function	1	341	4	19037	0.00187432	0.006655276	13.95674487	Eif2ak2
GO:0010998	regulation of translational initiation by eIF2 alpha phosphorylation	biological_process	1	341	4	19037	0.00187432	0.006655276	13.95674487	Eif2ak2
GO:1901532	regulation of hematopoietic progenitor cell differentiation	biological_process	1	341	4	19037	0.00187432	0.006655276	13.95674487	Eif2ak2
GO:0015467	G-protein activated inward rectifier potassium channel activity	molecular_function	1	341	4	19037	0.00187432	0.006655276	13.95674487	Kcnj3
GO:0004969	histamine receptor activity	molecular_function	1	341	4	19037	0.00187432	0.006655276	13.95674487	Hrh1
GO:0007199	G-protein coupled receptor signaling pathway coupled to cGMP nucleotide second messenger	biological_process	1	341	4	19037	0.00187432	0.006655276	13.95674487	Hrh1
GO:0044305	calyx of Held	cellular_component	1	341	4	19037	0.00187432	0.006655276	13.95674487	Kcnk2
GO:1905243	cellular response to 3,3',5-triiodo-L-thyronine	biological_process	1	341	4	19037	0.00187432	0.006655276	13.95674487	Myh6
GO:1901509	regulation of endothelial tube morphogenesis	biological_process	1	341	4	19037	0.00187432	0.006655276	13.95674487	Cxcl10
GO:0001920	negative regulation of receptor recycling	biological_process	1	341	4	19037	0.00187432	0.006655276	13.95674487	Trat1
GO:0046642	negative regulation of alpha-beta T cell proliferation	biological_process	1	341	4	19037	0.00187432	0.006655276	13.95674487	Tnfrsf14
GO:0071306	cellular response to vitamin E	biological_process	1	341	4	19037	0.00187432	0.006655276	13.95674487	Col2a1
GO:0035701	hematopoietic stem cell migration	biological_process	1	341	4	19037	0.00187432	0.006655276	13.95674487	Bcl11b
GO:0031296	B cell costimulation	biological_process	1	341	4	19037	0.00187432	0.006655276	13.95674487	Tnfrsf13c
GO:0047484	regulation of response to osmotic stress	biological_process	1	341	4	19037	0.00187432	0.006655276	13.95674487	Mlc1
GO:0009597	detection of virus	biological_process	1	341	4	19037	0.00187432	0.006655276	13.95674487	Ddx58
GO:0070915	lysophosphatidic acid receptor activity	molecular_function	1	341	4	19037	0.00187432	0.006655276	13.95674487	Lpar4
GO:0014053	negative regulation of gamma-aminobutyric acid secretion	biological_process	1	341	4	19037	0.00187432	0.006655276	13.95674487	Abat
GO:0031652	positive regulation of heat generation	biological_process	1	341	4	19037	0.00187432	0.006655276	13.95674487	Abat
GO:0045590	negative regulation of regulatory T cell differentiation	biological_process	1	341	4	19037	0.00187432	0.006655276	13.95674487	Irf1
GO:0061739	protein lipidation involved in autophagosome assembly	biological_process	1	341	4	19037	0.00187432	0.006655276	13.95674487	Irgm
GO:0004127	cytidylate kinase activity	molecular_function	1	341	4	19037	0.00187432	0.006655276	13.95674487	Cmpk2
GO:0006235	dTTP biosynthetic process	biological_process	1	341	4	19037	0.00187432	0.006655276	13.95674487	Cmpk2
GO:0036378	calcitriol biosynthetic process from calciol	biological_process	1	341	4	19037	0.00187432	0.006655276	13.95674487	Cyp27a1
GO:0030035	microspike assembly	biological_process	1	341	4	19037	0.00187432	0.006655276	13.95674487	Actn2
GO:2001137	positive regulation of endocytic recycling	biological_process	1	341	4	19037	0.00187432	0.006655276	13.95674487	Actn2
GO:1900041	negative regulation of interleukin-2 secretion	biological_process	1	341	4	19037	0.00187432	0.006655276	13.95674487	Gbp1
GO:0060474	positive regulation of flagellated sperm motility involved in capacitation	biological_process	1	341	4	19037	0.00187432	0.006655276	13.95674487	Ccr6
GO:0072676	lymphocyte migration	biological_process	1	341	4	19037	0.00187432	0.006655276	13.95674487	Ccr6
GO:2000404	regulation of T cell migration	biological_process	1	341	4	19037	0.00187432	0.006655276	13.95674487	Ccr6
GO:0002922	positive regulation of humoral immune response	biological_process	1	341	4	19037	0.00187432	0.006655276	13.95674487	Ccr7
GO:2000525	positive regulation of T cell costimulation	biological_process	1	341	4	19037	0.00187432	0.006655276	13.95674487	Ccr7
GO:0050250	retinal oxidase activity	molecular_function	1	341	4	19037	0.00187432	0.006655276	13.95674487	Aox2
GO:0102797	geranial:oxygen oxidoreductase activity	molecular_function	1	341	4	19037	0.00187432	0.006655276	13.95674487	Aox2
GO:0102798	heptaldehyde:oxygen oxidoreductase activity	molecular_function	1	341	4	19037	0.00187432	0.006655276	13.95674487	Aox2
GO:2000779	regulation of double-strand break repair	biological_process	1	341	4	19037	0.00187432	0.006655276	13.95674487	Pml
GO:0004839	ubiquitin activating enzyme activity	molecular_function	1	341	4	19037	0.00187432	0.006655276	13.95674487	Uba7
GO:0030135	coated vesicle	cellular_component	1	341	4	19037	0.00187432	0.006655276	13.95674487	Ngfr
GO:0043121	neurotrophin binding	molecular_function	1	341	4	19037	0.00187432	0.006655276	13.95674487	Ngfr
GO:1903588	negative regulation of blood vessel endothelial cell proliferation involved in sprouting angiogenesis	biological_process	1	341	4	19037	0.00187432	0.006655276	13.95674487	Ngfr
GO:0006565	L-serine catabolic process	biological_process	1	341	4	19037	0.00187432	0.006655276	13.95674487	Cbs
GO:0042262	DNA protection	biological_process	1	341	4	19037	0.00187432	0.006655276	13.95674487	Cbs
GO:0008282	inward rectifying potassium channel	cellular_component	1	341	4	19037	0.00187432	0.006655276	13.95674487	Kcnj11
GO:0015272	ATP-activated inward rectifier potassium channel activity	molecular_function	1	341	4	19037	0.00187432	0.006655276	13.95674487	Kcnj11
GO:0002669	positive regulation of T cell anergy	biological_process	1	341	4	19037	0.00187432	0.006655276	13.95674487	Cd3e
GO:0046068	cGMP metabolic process	biological_process	1	341	4	19037	0.00187432	0.006655276	13.95674487	Atp2b2
GO:1901660	calcium ion export	biological_process	1	341	4	19037	0.00187432	0.006655276	13.95674487	Atp2b2
GO:0002730	regulation of dendritic cell cytokine production	biological_process	1	341	4	19037	0.00187432	0.006655276	13.95674487	Tlr3
GO:0002756	MyD88-independent toll-like receptor signaling pathway	biological_process	1	341	4	19037	0.00187432	0.006655276	13.95674487	Tlr3
GO:0045356	positive regulation of interferon-alpha biosynthetic process	biological_process	1	341	4	19037	0.00187432	0.006655276	13.95674487	Tlr3
GO:0032190	acrosin binding	molecular_function	1	341	4	19037	0.00187432	0.006655276	13.95674487	Zp2
GO:0060468	prevention of polyspermy	biological_process	1	341	4	19037	0.00187432	0.006655276	13.95674487	Zp2
GO:1904872	regulation of telomerase RNA localization to Cajal body	biological_process	1	341	4	19037	0.00187432	0.006655276	13.95674487	Dcp2
GO:0006382	adenosine to inosine editing	biological_process	1	341	4	19037	0.00187432	0.006655276	13.95674487	Adar
GO:0044530	supraspliceosomal complex	cellular_component	1	341	4	19037	0.00187432	0.006655276	13.95674487	Adar
GO:0035995	detection of muscle stretch	biological_process	1	341	4	19037	0.00187432	0.006655276	13.95674487	Csrp3
GO:0007501	mesodermal cell fate specification	biological_process	1	341	4	19037	0.00187432	0.006655276	13.95674487	Six2
GO:0072137	condensed mesenchymal cell proliferation	biological_process	1	341	4	19037	0.00187432	0.006655276	13.95674487	Six2
GO:0032682	negative regulation of chemokine production	biological_process	1	341	4	19037	0.00187432	0.006655276	13.95674487	Lgals9
GO:0032815	negative regulation of natural killer cell activation	biological_process	1	341	4	19037	0.00187432	0.006655276	13.95674487	Lgals9
GO:2000670	positive regulation of dendritic cell apoptotic process	biological_process	1	341	4	19037	0.00187432	0.006655276	13.95674487	Lgals9
GO:1901844	regulation of cell communication by electrical coupling involved in cardiac conduction	biological_process	1	341	4	19037	0.00187432	0.006655276	13.95674487	Hrc
GO:0071873	response to norepinephrine	biological_process	1	341	4	19037	0.00187432	0.006655276	13.95674487	Col1a2
GO:1904401	cellular response to Thyroid stimulating hormone	biological_process	1	341	4	19037	0.00187432	0.006655276	13.95674487	Rplp2
GO:0033159	negative regulation of protein import into nucleus, translocation	biological_process	1	341	4	19037	0.00187432	0.006655276	13.95674487	Parp10
GO:0070213	protein auto-ADP-ribosylation	biological_process	1	341	4	19037	0.00187432	0.006655276	13.95674487	Parp10
GO:1901423	response to benzene	biological_process	1	341	4	19037	0.00187432	0.006655276	13.95674487	Psmb9
GO:0051454	intracellular pH elevation	biological_process	1	341	4	19037	0.00187432	0.006655276	13.95674487	Slc26a3
GO:0000103	sulfate assimilation	biological_process	1	341	4	19037	0.00187432	0.006655276	13.95674487	Sult1d1
GO:2000646	positive regulation of receptor catabolic process	biological_process	1	341	4	19037	0.00187432	0.006655276	13.95674487	Dtx3l
GO:0015440	peptide-transporting ATPase activity	molecular_function	1	341	4	19037	0.00187432	0.006655276	13.95674487	Tap1
GO:0050820	positive regulation of coagulation	biological_process	1	341	4	19037	0.00187432	0.006655276	13.95674487	Serpine1
GO:0002752	cell surface pattern recognition receptor signaling pathway	biological_process	1	341	4	19037	0.00187432	0.006655276	13.95674487	Fcnb
GO:0003009	skeletal muscle contraction	biological_process	3	341	30	19037	0.001918632	0.006802155	5.582697947	Tnnc1; Tnni3; Tnnt2
GO:0048872	homeostasis of number of cells	biological_process	3	341	31	19037	0.002172141	0.007677338	5.402610917	Carmil2; Ccr4; Ccr7
GO:0031663	lipopolysaccharide-mediated signaling pathway	biological_process	3	341	31	19037	0.002172141	0.007677338	5.402610917	Ptpn22; Cd6; Stat1
GO:0090501	RNA phosphodiester bond hydrolysis	biological_process	2	341	15	19037	0.00220891	0.007771591	7.443597263	Rnase2; Samhd1
GO:0016540	protein autoprocessing	biological_process	2	341	15	19037	0.00220891	0.007771591	7.443597263	Hfe2; Casp12
GO:2000484	positive regulation of interleukin-8 secretion	biological_process	2	341	15	19037	0.00220891	0.007771591	7.443597263	Lgals9; Fcnb
GO:0005249	voltage-gated potassium channel activity	molecular_function	5	341	75	19037	0.002254667	0.007920503	3.721798631	Kcna2; Kcng2; Kcng4; Kcnk2; Kcnj11
GO:0005102	signaling receptor binding	molecular_function	15	341	397	19037	0.002263169	0.00793829	2.109331718	Hfe2; RT1-A1; RT1-A2; Zap70; Srms; RT1-N3; Trdn; Dao; RT1-S3; Lgals9; Serpine1; RT1-T24-1; RT1-T24-3; RT1-T24-4; RT1-CE10
GO:0030018	Z disc	cellular_component	7	341	129	19037	0.00227943	0.007983192	3.029370979	Myom2; Myh6; Actn2; Csrp3; Hrc; Mybpc1; Mybpc3
GO:0032809	neuronal cell body membrane	cellular_component	3	341	32	19037	0.002447835	0.008560005	5.233779326	Kcna2; Ngfr; Atp2b2
GO:0005581	collagen trimer	cellular_component	4	341	53	19037	0.002541155	0.008872898	4.213356941	Col2a1; Col23a1; Col1a2; Fcnb
GO:0004842	ubiquitin-protein transferase activity	molecular_function	13	341	329	19037	0.002567586	0.008951643	2.20592928	Trim30c; Trim21; Trim25; Trim69; Herc6; Trim5; Rnf114; Rnf152; Klhl30; Klhl33; Uba7; Rnf213; Dtx3l
GO:0050771	negative regulation of axonogenesis	biological_process	2	341	16	19037	0.00268283	0.009283316	6.978372434	Efnb3; Rtn4r
GO:0009629	response to gravity	biological_process	2	341	16	19037	0.00268283	0.009283316	6.978372434	Acan; Hrh1
GO:0030816	positive regulation of cAMP metabolic process	biological_process	2	341	16	19037	0.00268283	0.009283316	6.978372434	Ramp3; Cxcl10
GO:0060047	heart contraction	biological_process	2	341	16	19037	0.00268283	0.009283316	6.978372434	Trdn; Tnni3
GO:0061136	regulation of proteasomal protein catabolic process	biological_process	2	341	16	19037	0.00268283	0.009283316	6.978372434	Psme1; Psme2
GO:0030145	manganese ion binding	molecular_function	4	341	55	19037	0.002992328	0.009575983	4.060143962	LOC103690064; LOC100909830; Dcp2; Lap3
GO:0010035	response to inorganic substance	biological_process	3	341	34	19037	0.003069527	0.009575983	4.925909953	Casp12; Eef1a2; Pgam2
GO:0045061	thymic T cell selection	biological_process	1	341	5	19037	0.003086885	0.009575983	11.16539589	Zap70
GO:0019815	B cell receptor complex	cellular_component	1	341	5	19037	0.003086885	0.009575983	11.16539589	Cd79b
GO:0046654	tetrahydrofolate biosynthetic process	biological_process	1	341	5	19037	0.003086885	0.009575983	11.16539589	Gch1
GO:2000121	regulation of removal of superoxide radicals	biological_process	1	341	5	19037	0.003086885	0.009575983	11.16539589	Gch1
GO:0005927	muscle tendon junction	cellular_component	1	341	5	19037	0.003086885	0.009575983	11.16539589	Smpx
GO:0005095	GTPase inhibitor activity	molecular_function	1	341	5	19037	0.003086885	0.009575983	11.16539589	Rtkn
GO:0023041	neuronal signal transduction	biological_process	1	341	5	19037	0.003086885	0.009575983	11.16539589	Rtn4r
GO:0048305	immunoglobulin secretion	biological_process	1	341	5	19037	0.003086885	0.009575983	11.16539589	Cd40lg
GO:0051023	regulation of immunoglobulin secretion	biological_process	1	341	5	19037	0.003086885	0.009575983	11.16539589	Cd40lg
GO:0031849	olfactory receptor binding	molecular_function	1	341	5	19037	0.003086885	0.009575983	11.16539589	Rtp4
GO:0050707	regulation of cytokine secretion	biological_process	1	341	5	19037	0.003086885	0.009575983	11.16539589	Socs1
GO:0044206	UMP salvage	biological_process	1	341	5	19037	0.003086885	0.009575983	11.16539589	Upp1
GO:0038065	collagen-activated signaling pathway	biological_process	1	341	5	19037	0.003086885	0.009575983	11.16539589	Ubash3a
GO:0030241	skeletal muscle myosin thick filament assembly	biological_process	1	341	5	19037	0.003086885	0.009575983	11.16539589	Myom2
GO:0055131	C3HC4-type RING finger domain binding	molecular_function	1	341	5	19037	0.003086885	0.009575983	11.16539589	Dnaja1
GO:0000220	vacuolar proton-transporting V-type ATPase, V0 domain	cellular_component	1	341	5	19037	0.003086885	0.009575983	11.16539589	Tcirg1
GO:0048248	CXCR3 chemokine receptor binding	molecular_function	1	341	5	19037	0.003086885	0.009575983	11.16539589	Cxcl10
GO:0071225	cellular response to muramyl dipeptide	biological_process	1	341	5	19037	0.003086885	0.009575983	11.16539589	Ptpn22
GO:1903753	negative regulation of p38MAPK cascade	biological_process	1	341	5	19037	0.003086885	0.009575983	11.16539589	Ptpn22
GO:0031077	post-embryonic camera-type eye development	biological_process	1	341	5	19037	0.003086885	0.009575983	11.16539589	Bcl11b
GO:0002636	positive regulation of germinal center formation	biological_process	1	341	5	19037	0.003086885	0.009575983	11.16539589	Tnfrsf13c
GO:0072584	caveolin-mediated endocytosis	biological_process	1	341	5	19037	0.003086885	0.009575983	11.16539589	Mlc1
GO:0072557	IPAF inflammasome complex	cellular_component	1	341	5	19037	0.003086885	0.009575983	11.16539589	Casp12
GO:0097169	AIM2 inflammasome complex	cellular_component	1	341	5	19037	0.003086885	0.009575983	11.16539589	Casp12
GO:0097199	cysteine-type endopeptidase activity involved in apoptotic signaling pathway	molecular_function	1	341	5	19037	0.003086885	0.009575983	11.16539589	Casp12
GO:0035279	mRNA cleavage involved in gene silencing by miRNA	biological_process	1	341	5	19037	0.003086885	0.009575983	11.16539589	Mov10
GO:0070290	N-acylphosphatidylethanolamine-specific phospholipase D activity	molecular_function	1	341	5	19037	0.003086885	0.009575983	11.16539589	Cmah
GO:0070291	N-acylethanolamine metabolic process	biological_process	1	341	5	19037	0.003086885	0.009575983	11.16539589	Cmah
GO:0045964	positive regulation of dopamine metabolic process	biological_process	1	341	5	19037	0.003086885	0.009575983	11.16539589	Abat
GO:0002819	regulation of adaptive immune response	biological_process	1	341	5	19037	0.003086885	0.009575983	11.16539589	Irf7
GO:0071547	piP-body	cellular_component	1	341	5	19037	0.003086885	0.009575983	11.16539589	Piwil4
GO:0051434	BH3 domain binding	molecular_function	1	341	5	19037	0.003086885	0.009575983	11.16539589	Irgm
GO:0075044	autophagy of host cells involved in interaction with symbiont	biological_process	1	341	5	19037	0.003086885	0.009575983	11.16539589	Irgm
GO:0043367	CD4-positive, alpha-beta T cell differentiation	biological_process	1	341	5	19037	0.003086885	0.009575983	11.16539589	Rsad2
GO:0051373	FATZ binding	molecular_function	1	341	5	19037	0.003086885	0.009575983	11.16539589	Actn2
GO:0072734	cellular response to staurosporine	biological_process	1	341	5	19037	0.003086885	0.009575983	11.16539589	Casp7
GO:0097524	sperm plasma membrane	cellular_component	1	341	5	19037	0.003086885	0.009575983	11.16539589	Ccr6
GO:1903936	cellular response to sodium arsenite	biological_process	1	341	5	19037	0.003086885	0.009575983	11.16539589	Daxx
GO:0002326	B cell lineage commitment	biological_process	1	341	5	19037	0.003086885	0.009575983	11.16539589	Rag2
GO:0016098	monoterpenoid metabolic process	biological_process	1	341	5	19037	0.003086885	0.009575983	11.16539589	Cyp2e1
GO:0046483	heterocycle metabolic process	biological_process	1	341	5	19037	0.003086885	0.009575983	11.16539589	Cyp2e1
GO:0004031	aldehyde oxidase activity	molecular_function	1	341	5	19037	0.003086885	0.009575983	11.16539589	Aox2
GO:0004854	xanthine dehydrogenase activity	molecular_function	1	341	5	19037	0.003086885	0.009575983	11.16539589	Aox2
GO:0009115	xanthine catabolic process	biological_process	1	341	5	19037	0.003086885	0.009575983	11.16539589	Aox2
GO:0016903	oxidoreductase activity, acting on the aldehyde or oxo group of donors	molecular_function	1	341	5	19037	0.003086885	0.009575983	11.16539589	Aox2
GO:0060058	positive regulation of apoptotic process involved in mammary gland involution	biological_process	1	341	5	19037	0.003086885	0.009575983	11.16539589	Pml
GO:0016048	detection of temperature stimulus	biological_process	1	341	5	19037	0.003086885	0.009575983	11.16539589	Ngfr
GO:0019346	transsulfuration	biological_process	1	341	5	19037	0.003086885	0.009575983	11.16539589	Cbs
GO:0070891	lipoteichoic acid binding	molecular_function	1	341	5	19037	0.003086885	0.009575983	11.16539589	Cd6
GO:0021871	forebrain regionalization	biological_process	1	341	5	19037	0.003086885	0.009575983	11.16539589	Wnt2b
GO:0034123	positive regulation of toll-like receptor signaling pathway	biological_process	1	341	5	19037	0.003086885	0.009575983	11.16539589	Tlr3
GO:0004111	creatine kinase activity	molecular_function	1	341	5	19037	0.003086885	0.009575983	11.16539589	Ckm
GO:1902732	positive regulation of chondrocyte proliferation	biological_process	1	341	5	19037	0.003086885	0.009575983	11.16539589	Six2
GO:1902714	negative regulation of interferon-gamma secretion	biological_process	1	341	5	19037	0.003086885	0.009575983	11.16539589	Lgals9
GO:2000563	positive regulation of CD4-positive, alpha-beta T cell proliferation	biological_process	1	341	5	19037	0.003086885	0.009575983	11.16539589	Lgals9
GO:2000667	positive regulation of interleukin-13 secretion	biological_process	1	341	5	19037	0.003086885	0.009575983	11.16539589	Lgals9
GO:2001181	positive regulation of interleukin-10 secretion	biological_process	1	341	5	19037	0.003086885	0.009575983	11.16539589	Lgals9
GO:2001184	positive regulation of interleukin-12 secretion	biological_process	1	341	5	19037	0.003086885	0.009575983	11.16539589	Lgals9
GO:0016556	mRNA modification	biological_process	1	341	5	19037	0.003086885	0.009575983	11.16539589	Apobec2
GO:0010742	macrophage derived foam cell differentiation	biological_process	1	341	5	19037	0.003086885	0.009575983	11.16539589	Stat1
GO:0043456	regulation of pentose-phosphate shunt	biological_process	1	341	5	19037	0.003086885	0.009575983	11.16539589	Pgam2
GO:2000051	negative regulation of non-canonical Wnt signaling pathway	biological_process	1	341	5	19037	0.003086885	0.009575983	11.16539589	Rnf213
GO:1902474	positive regulation of protein localization to synapse	biological_process	1	341	5	19037	0.003086885	0.009575983	11.16539589	Clstn3
GO:0032407	MutSalpha complex binding	molecular_function	1	341	5	19037	0.003086885	0.009575983	11.16539589	Trex1
GO:0060336	negative regulation of interferon-gamma-mediated signaling pathway	biological_process	1	341	5	19037	0.003086885	0.009575983	11.16539589	Parp14
GO:0036042	long-chain fatty acyl-CoA binding	molecular_function	1	341	5	19037	0.003086885	0.009575983	11.16539589	Pnpla3
GO:0042171	lysophosphatidic acid acyltransferase activity	molecular_function	1	341	5	19037	0.003086885	0.009575983	11.16539589	Pnpla3
GO:0014889	muscle atrophy	biological_process	1	341	5	19037	0.003086885	0.009575983	11.16539589	Psmb9
GO:0051546	keratinocyte migration	biological_process	1	341	5	19037	0.003086885	0.009575983	11.16539589	Krt2
GO:0004062	aryl sulfotransferase activity	molecular_function	1	341	5	19037	0.003086885	0.009575983	11.16539589	Sult1d1
GO:0006584	catecholamine metabolic process	biological_process	1	341	5	19037	0.003086885	0.009575983	11.16539589	Sult1d1
GO:0033522	histone H2A ubiquitination	biological_process	1	341	5	19037	0.003086885	0.009575983	11.16539589	Dtx3l
GO:0097187	dentinogenesis	biological_process	1	341	5	19037	0.003086885	0.009575983	11.16539589	Serpine1
GO:0097367	carbohydrate derivative binding	molecular_function	1	341	5	19037	0.003086885	0.009575983	11.16539589	Fcnb
GO:0031117	positive regulation of microtubule depolymerization	biological_process	1	341	5	19037	0.003086885	0.009575983	11.16539589	Stmn2
GO:0008076	voltage-gated potassium channel complex	cellular_component	5	341	80	19037	0.003123729	0.009677272	3.489186217	Kcna2; Kcng2; Kcng4; Kcnj3; Kcnk2
GO:0000175	3'-5'-exoribonuclease activity	molecular_function	2	341	17	19037	0.003214829	0.009893099	6.567879938	Pnpt1; Isg20
GO:0031362	anchored component of external side of plasma membrane	cellular_component	2	341	17	19037	0.003214829	0.009893099	6.567879938	Rtn4r; Art2b
GO:0042267	natural killer cell mediated cytotoxicity	biological_process	2	341	17	19037	0.003214829	0.009893099	6.567879938	Klrk1; Gzmbl3
GO:0090026	positive regulation of monocyte chemotaxis	biological_process	2	341	17	19037	0.003214829	0.009893099	6.567879938	Cxcl10; Serpine1
GO:2000045	regulation of G1/S transition of mitotic cell cycle	biological_process	2	341	17	19037	0.003214829	0.009893099	6.567879938	Psme1; Psme2
GO:0019900	kinase binding	molecular_function	6	341	108	19037	0.00331045	0.010173794	3.10149886	Klrk1; Myom2; Sp100; Ptpn22; Jakmip1; Sit1
GO:0070098	chemokine-mediated signaling pathway	biological_process	4	341	57	19037	0.00349863	0.010737815	3.91768277	Ccl12; Cxcl10; Ccr4; Ccr6
GO:0060612	adipose tissue development	biological_process	3	341	36	19037	0.003791067	0.011604487	4.652248289	Ebf2; Nampt; Fgl1
GO:0032781	positive regulation of ATPase activity	biological_process	3	341	36	19037	0.003791067	0.011604487	4.652248289	Dnaja1; Myl4; Tnnt2
GO:0048245	eosinophil chemotaxis	biological_process	2	341	18	19037	0.003807046	0.011607215	6.202997719	Ccl12; Hrh1
GO:0048037	cofactor binding	molecular_function	2	341	18	19037	0.003807046	0.011607215	6.202997719	Dao; Pgam2
GO:1900017	positive regulation of cytokine production involved in inflammatory response	biological_process	2	341	18	19037	0.003807046	0.011607215	6.202997719	Gbp5; Cd6
GO:0043065	positive regulation of apoptotic process	biological_process	13	341	345	19037	0.003922771	0.011944267	2.103625313	Klrk1; Eif2ak2; Dnaja1; Sp110; Casp12; Eef1a2; Daxx; Ngfr; Tlr3; Mnda; Csrnp3; Tnfsf10; Ifit2
GO:0016791	phosphatase activity	molecular_function	4	341	59	19037	0.004063681	0.01235146	3.784879964	Ubash3a; Ptpn22; Nt5c3a; Pxylp1
GO:0007166	cell surface receptor signaling pathway	biological_process	8	341	173	19037	0.004067205	0.01235146	2.581594426	Rtn4r; Tspan4; Tnfrsf13b; Mlkl; Cd3d; Cd3e; Cd3g; Cd8a
GO:0000979	RNA polymerase II core promoter sequence-specific DNA binding	molecular_function	3	341	37	19037	0.004191511	0.012571991	4.526511849	Irf7; Stat1; Nlrc5
GO:0030889	negative regulation of B cell proliferation	biological_process	2	341	19	19037	0.00446145	0.012571991	5.876524155	Tnfrsf13b; Mnda
GO:0043152	induction of bacterial agglutination	biological_process	1	341	6	19037	0.004575594	0.012571991	9.304496579	Rnase2
GO:0006370	7-methylguanosine mRNA capping	biological_process	1	341	6	19037	0.004575594	0.012571991	9.304496579	Cmtr1
GO:0098821	BMP receptor activity	molecular_function	1	341	6	19037	0.004575594	0.012571991	9.304496579	Hfe2
GO:1990712	HFE-transferrin receptor complex	cellular_component	1	341	6	19037	0.004575594	0.012571991	9.304496579	Hfe2
GO:0005324	long-chain fatty acid transporter activity	molecular_function	1	341	6	19037	0.004575594	0.012571991	9.304496579	Fabp3
GO:0044539	long-chain fatty acid import	biological_process	1	341	6	19037	0.004575594	0.012571991	9.304496579	Fabp3
GO:0034502	protein localization to chromosome	biological_process	1	341	6	19037	0.004575594	0.012571991	9.304496579	Spo11
GO:0030011	maintenance of cell polarity	biological_process	1	341	6	19037	0.004575594	0.012571991	9.304496579	Carmil2
GO:0044354	macropinosome	cellular_component	1	341	6	19037	0.004575594	0.012571991	9.304496579	Carmil2
GO:0044336	canonical Wnt signaling pathway involved in negative regulation of apoptotic process	biological_process	1	341	6	19037	0.004575594	0.012571991	9.304496579	Tcf7
GO:0060591	chondroblast differentiation	biological_process	1	341	6	19037	0.004575594	0.012571991	9.304496579	Acan
GO:0003006	developmental process involved in reproduction	biological_process	1	341	6	19037	0.004575594	0.012571991	9.304496579	Csf1
GO:0035374	chondroitin sulfate binding	molecular_function	1	341	6	19037	0.004575594	0.012571991	9.304496579	Rtn4r
GO:0033590	response to cobalamin	biological_process	1	341	6	19037	0.004575594	0.012571991	9.304496579	Cd40lg
GO:0030620	U2 snRNA binding	molecular_function	1	341	6	19037	0.004575594	0.012571991	9.304496579	Isg20
GO:0019210	kinase inhibitor activity	molecular_function	1	341	6	19037	0.004575594	0.012571991	9.304496579	Socs1
GO:0042509	regulation of tyrosine phosphorylation of STAT protein	biological_process	1	341	6	19037	0.004575594	0.012571991	9.304496579	Socs1
GO:0002074	extraocular skeletal muscle development	biological_process	1	341	6	19037	0.004575594	0.012571991	9.304496579	Myom2
GO:0038001	paracrine signaling	biological_process	1	341	6	19037	0.004575594	0.012571991	9.304496579	Mb21d1
GO:0003956	NAD(P)+-protein-arginine ADP-ribosyltransferase activity	molecular_function	1	341	6	19037	0.004575594	0.012571991	9.304496579	Art2b
GO:0007197	adenylate cyclase-inhibiting G-protein coupled acetylcholine receptor signaling pathway	biological_process	1	341	6	19037	0.004575594	0.012571991	9.304496579	Hrh1
GO:0010894	negative regulation of steroid biosynthetic process	biological_process	1	341	6	19037	0.004575594	0.012571991	9.304496579	Hrh1
GO:0016907	G-protein coupled acetylcholine receptor activity	molecular_function	1	341	6	19037	0.004575594	0.012571991	9.304496579	Hrh1
GO:0070585	protein localization to mitochondrion	biological_process	1	341	6	19037	0.004575594	0.012571991	9.304496579	Dnaja1
GO:0051271	negative regulation of cellular component movement	biological_process	1	341	6	19037	0.004575594	0.012571991	9.304496579	Sp100
GO:0070087	chromo shadow domain binding	molecular_function	1	341	6	19037	0.004575594	0.012571991	9.304496579	Sp100
GO:1902041	regulation of extrinsic apoptotic signaling pathway via death domain receptors	biological_process	1	341	6	19037	0.004575594	0.012571991	9.304496579	Sp100
GO:0070296	sarcoplasmic reticulum calcium ion transport	biological_process	1	341	6	19037	0.004575594	0.012571991	9.304496579	Sln
GO:0051573	negative regulation of histone H3-K9 methylation	biological_process	1	341	6	19037	0.004575594	0.012571991	9.304496579	Pax5
GO:0006029	proteoglycan metabolic process	biological_process	1	341	6	19037	0.004575594	0.012571991	9.304496579	Col2a1
GO:0097065	anterior head development	biological_process	1	341	6	19037	0.004575594	0.012571991	9.304496579	Col2a1
GO:0032388	positive regulation of intracellular transport	biological_process	1	341	6	19037	0.004575594	0.012571991	9.304496579	Mlc1
GO:0010041	response to iron(III) ion	biological_process	1	341	6	19037	0.004575594	0.012571991	9.304496579	Casp12
GO:0043227	membrane-bounded organelle	cellular_component	1	341	6	19037	0.004575594	0.012571991	9.304496579	Cmah
GO:0033602	negative regulation of dopamine secretion	biological_process	1	341	6	19037	0.004575594	0.012571991	9.304496579	Abat
GO:0043374	CD8-positive, alpha-beta T cell differentiation	biological_process	1	341	6	19037	0.004575594	0.012571991	9.304496579	Irf1
GO:0034584	piRNA binding	molecular_function	1	341	6	19037	0.004575594	0.012571991	9.304496579	Piwil4
GO:1901098	positive regulation of autophagosome maturation	biological_process	1	341	6	19037	0.004575594	0.012571991	9.304496579	Irgm
GO:2000553	positive regulation of T-helper 2 cell cytokine production	biological_process	1	341	6	19037	0.004575594	0.012571991	9.304496579	Rsad2
GO:0006706	steroid catabolic process	biological_process	1	341	6	19037	0.004575594	0.012571991	9.304496579	Cyp27a1
GO:0030375	thyroid hormone receptor coactivator activity	molecular_function	1	341	6	19037	0.004575594	0.012571991	9.304496579	Actn2
GO:1900227	positive regulation of NLRP3 inflammasome complex assembly	biological_process	1	341	6	19037	0.004575594	0.012571991	9.304496579	Gbp5
GO:0002606	positive regulation of dendritic cell antigen processing and presentation	biological_process	1	341	6	19037	0.004575594	0.012571991	9.304496579	Ccr7
GO:0007182	common-partner SMAD protein phosphorylation	biological_process	1	341	6	19037	0.004575594	0.012571991	9.304496579	Pml
GO:0042406	extrinsic component of endoplasmic reticulum membrane	cellular_component	1	341	6	19037	0.004575594	0.012571991	9.304496579	Pml
GO:0050713	negative regulation of interleukin-1 beta secretion	biological_process	1	341	6	19037	0.004575594	0.012571991	9.304496579	Pml
GO:0005168	neurotrophin TRKA receptor binding	molecular_function	1	341	6	19037	0.004575594	0.012571991	9.304496579	Ngfr
GO:0006307	DNA dealkylation involved in DNA repair	biological_process	1	341	6	19037	0.004575594	0.012571991	9.304496579	Ascc3
GO:0006563	L-serine metabolic process	biological_process	1	341	6	19037	0.004575594	0.012571991	9.304496579	Cbs
GO:1904047	S-adenosyl-L-methionine binding	molecular_function	1	341	6	19037	0.004575594	0.012571991	9.304496579	Cbs
GO:0097550	transcriptional preinitiation complex	cellular_component	1	341	6	19037	0.004575594	0.012571991	9.304496579	Gtf2f2
GO:0002455	humoral immune response mediated by circulating immunoglobulin	biological_process	1	341	6	19037	0.004575594	0.012571991	9.304496579	Zp2
GO:0035749	myelin sheath adaxonal region	cellular_component	1	341	6	19037	0.004575594	0.012571991	9.304496579	Cnp
GO:0043353	enucleate erythrocyte differentiation	biological_process	1	341	6	19037	0.004575594	0.012571991	9.304496579	Mb
GO:1903779	regulation of cardiac conduction	biological_process	1	341	6	19037	0.004575594	0.012571991	9.304496579	Tnni3k
GO:0061484	hematopoietic stem cell homeostasis	biological_process	1	341	6	19037	0.004575594	0.012571991	9.304496579	Adar
GO:0043426	MRF binding	molecular_function	1	341	6	19037	0.004575594	0.012571991	9.304496579	Csrp3
GO:0061629	RNA polymerase II sequence-specific DNA binding transcription factor binding	molecular_function	1	341	6	19037	0.004575594	0.012571991	9.304496579	Csrp3
GO:0021696	cerebellar cortex morphogenesis	biological_process	1	341	6	19037	0.004575594	0.012571991	9.304496579	Rfx4
GO:0016936	galactoside binding	molecular_function	1	341	6	19037	0.004575594	0.012571991	9.304496579	Lgals9
GO:0032732	positive regulation of interleukin-1 production	biological_process	1	341	6	19037	0.004575594	0.012571991	9.304496579	Lgals9
GO:0034134	toll-like receptor 2 signaling pathway	biological_process	1	341	6	19037	0.004575594	0.012571991	9.304496579	Lgals9
GO:1900426	positive regulation of defense response to bacterium	biological_process	1	341	6	19037	0.004575594	0.012571991	9.304496579	Lgals9
GO:2001269	positive regulation of cysteine-type endopeptidase activity involved in apoptotic signaling pathway	biological_process	1	341	6	19037	0.004575594	0.012571991	9.304496579	Lgals9
GO:0016554	cytidine to uridine editing	biological_process	1	341	6	19037	0.004575594	0.012571991	9.304496579	Apobec2
GO:0032813	tumor necrosis factor receptor superfamily binding	molecular_function	1	341	6	19037	0.004575594	0.012571991	9.304496579	Tnfsf10
GO:0090140	regulation of mitochondrial fission	biological_process	1	341	6	19037	0.004575594	0.012571991	9.304496579	Stat2
GO:0043587	tongue morphogenesis	biological_process	1	341	6	19037	0.004575594	0.012571991	9.304496579	Krt13
GO:0015277	kainate selective glutamate receptor activity	molecular_function	1	341	6	19037	0.004575594	0.012571991	9.304496579	Grik4
GO:0032983	kainate selective glutamate receptor complex	cellular_component	1	341	6	19037	0.004575594	0.012571991	9.304496579	Grik4
GO:0032405	MutLalpha complex binding	molecular_function	1	341	6	19037	0.004575594	0.012571991	9.304496579	Trex1
GO:0015833	peptide transport	biological_process	1	341	6	19037	0.004575594	0.012571991	9.304496579	Tap1
GO:0043549	regulation of kinase activity	biological_process	1	341	6	19037	0.004575594	0.012571991	9.304496579	Nlrc5
GO:0010757	negative regulation of plasminogen activation	biological_process	1	341	6	19037	0.004575594	0.012571991	9.304496579	Serpine1
GO:0071409	cellular response to cycloheximide	biological_process	1	341	6	19037	0.004575594	0.012571991	9.304496579	Serpine1
GO:1904045	cellular response to aldosterone	biological_process	1	341	6	19037	0.004575594	0.012571991	9.304496579	Serpine1
GO:0043654	recognition of apoptotic cell	biological_process	1	341	6	19037	0.004575594	0.012571991	9.304496579	Fcnb
GO:0097119	postsynaptic density protein 95 clustering	biological_process	1	341	6	19037	0.004575594	0.012571991	9.304496579	Lrrc4
GO:0060135	maternal process involved in female pregnancy	biological_process	3	341	38	19037	0.004619558	0.012662637	4.407393116	Ifi27; Cbs; Lgals9
GO:0033077	T cell differentiation in thymus	biological_process	3	341	38	19037	0.004619558	0.012662637	4.407393116	Bcl11b; Rag2; Cd3e
GO:0030246	carbohydrate binding	molecular_function	8	341	177	19037	0.00472022	0.012923211	2.523253309	Acan; Klrk1; Fcer2; Clec2dl1; Vcan; Lgals9; Grifin; Fcnb
GO:0005125	cytokine activity	molecular_function	7	341	146	19037	0.004857749	0.013283987	2.676636002	Sectm1b; Csf1; Cd40lg; Nampt; Cxcl10; LOC103694381; Tnfsf10
GO:0051000	positive regulation of nitric-oxide synthase activity	biological_process	2	341	20	19037	0.005179844	0.014081366	5.582697947	Gch1; Fcer2
GO:0048557	embryonic digestive tract morphogenesis	biological_process	2	341	20	19037	0.005179844	0.014081366	5.582697947	Tcf7; Six2
GO:0010880	regulation of release of sequestered calcium ion into cytosol by sarcoplasmic reticulum	biological_process	2	341	20	19037	0.005179844	0.014081366	5.582697947	Trdn; Hrc
GO:0005242	inward rectifier potassium channel activity	molecular_function	2	341	20	19037	0.005179844	0.014081366	5.582697947	Kcnj3; Kcnj11
GO:0032211	negative regulation of telomere maintenance via telomerase	biological_process	2	341	20	19037	0.005179844	0.014081366	5.582697947	Pml; Dcp2
GO:2001235	positive regulation of apoptotic signaling pathway	biological_process	3	341	40	19037	0.005561814	0.015097052	4.18702346	Daxx; Pml; Ngfr
GO:0005789	endoplasmic reticulum membrane	cellular_component	18	341	555	19037	0.005566548	0.015097052	1.81060474	RGD1309362; Pnpt1; Faxdc2; RGD1305184; Kcna2; Kcnk2; Oas1b; Ifi47; MGC105567; Clcn4; Irgm; Rsad2; MGC108823; Tapbp; LOC100910979; Mx1; Clstn3; Igtp
GO:0001502	cartilage condensation	biological_process	2	341	21	19037	0.005963872	0.015897884	5.316855188	Acan; Col2a1
GO:0019955	cytokine binding	molecular_function	2	341	21	19037	0.005963872	0.015897884	5.316855188	Osmr; Gbp1
GO:0006402	mRNA catabolic process	biological_process	2	341	21	19037	0.005963872	0.015897884	5.316855188	Pnpt1; Dcp2
GO:0070628	proteasome binding	molecular_function	2	341	21	19037	0.005963872	0.015897884	5.316855188	Isg15; Psmb9
GO:0045089	positive regulation of innate immune response	biological_process	2	341	21	19037	0.005963872	0.015897884	5.316855188	Gbp5; Lgals9
GO:0070207	protein homotrimerization	biological_process	3	341	41	19037	0.006077647	0.015897884	4.084900937	Pnpt1; Col23a1; Mlkl
GO:0051015	actin filament binding	molecular_function	8	341	185	19037	0.006268754	0.015897884	2.414139653	Myom2; Myh6; Myl4; Actn2; Tnnc1; Tnni3; Mybpc1; Mybpc3
GO:0016004	phospholipase activator activity	molecular_function	1	341	7	19037	0.006330223	0.015897884	7.975282782	Ccl12
GO:0034711	inhibin binding	molecular_function	1	341	7	19037	0.006330223	0.015897884	7.975282782	Igsf1
GO:1900042	positive regulation of interleukin-2 secretion	biological_process	1	341	7	19037	0.006330223	0.015897884	7.975282782	Carmil2
GO:0043457	regulation of cellular respiration	biological_process	1	341	7	19037	0.006330223	0.015897884	7.975282782	Pnpt1
GO:0097647	amylin receptor signaling pathway	biological_process	1	341	7	19037	0.006330223	0.015897884	7.975282782	Ramp3
GO:2001014	regulation of skeletal muscle cell differentiation	biological_process	1	341	7	19037	0.006330223	0.015897884	7.975282782	Rbfox1
GO:0015037	peptide disulfide oxidoreductase activity	molecular_function	1	341	7	19037	0.006330223	0.015897884	7.975282782	Pdia5
GO:0000915	actomyosin contractile ring assembly	biological_process	1	341	7	19037	0.006330223	0.015897884	7.975282782	Rtkn
GO:0060763	mammary duct terminal end bud growth	biological_process	1	341	7	19037	0.006330223	0.015897884	7.975282782	Csf1
GO:0090336	positive regulation of brown fat cell differentiation	biological_process	1	341	7	19037	0.006330223	0.015897884	7.975282782	Fndc5
GO:0051205	protein insertion into membrane	biological_process	1	341	7	19037	0.006330223	0.015897884	7.975282782	Rtp4
GO:0014808	release of sequestered calcium ion into cytosol by sarcoplasmic reticulum	biological_process	1	341	7	19037	0.006330223	0.015897884	7.975282782	Trdn
GO:0034511	U3 snoRNA binding	molecular_function	1	341	7	19037	0.006330223	0.015897884	7.975282782	Isg20
GO:0042608	T cell receptor binding	molecular_function	1	341	7	19037	0.006330223	0.015897884	7.975282782	RT1-S3
GO:0002925	positive regulation of humoral immune response mediated by circulating immunoglobulin	biological_process	1	341	7	19037	0.006330223	0.015897884	7.975282782	Fcer2
GO:0033010	paranodal junction	cellular_component	1	341	7	19037	0.006330223	0.015897884	7.975282782	Kcna2
GO:1990573	potassium ion import across plasma membrane	biological_process	1	341	7	19037	0.006330223	0.015897884	7.975282782	Kcnj3
GO:0019870	potassium channel inhibitor activity	molecular_function	1	341	7	19037	0.006330223	0.015897884	7.975282782	Kcnk2
GO:0033179	proton-transporting V-type ATPase, V0 domain	cellular_component	1	341	7	19037	0.006330223	0.015897884	7.975282782	Tcirg1
GO:0030870	Mre11 complex	cellular_component	1	341	7	19037	0.006330223	0.015897884	7.975282782	Sp100
GO:0034141	positive regulation of toll-like receptor 3 signaling pathway	biological_process	1	341	7	19037	0.006330223	0.015897884	7.975282782	Ptpn22
GO:2000483	negative regulation of interleukin-8 secretion	biological_process	1	341	7	19037	0.006330223	0.015897884	7.975282782	Ptpn22
GO:0042289	MHC class II protein binding	molecular_function	1	341	7	19037	0.006330223	0.015897884	7.975282782	Col2a1
GO:0071599	otic vesicle development	biological_process	1	341	7	19037	0.006330223	0.015897884	7.975282782	Col2a1
GO:0021902	commitment of neuronal cell to specific neuron type in forebrain	biological_process	1	341	7	19037	0.006330223	0.015897884	7.975282782	Bcl11b
GO:0010046	response to mycotoxin	biological_process	1	341	7	19037	0.006330223	0.015897884	7.975282782	Havcr1
GO:0033005	positive regulation of mast cell activation	biological_process	1	341	7	19037	0.006330223	0.015897884	7.975282782	Havcr1
GO:0070431	nucleotide-binding oligomerization domain containing 2 signaling pathway	biological_process	1	341	7	19037	0.006330223	0.015897884	7.975282782	Irgm
GO:0030274	LIM domain binding	molecular_function	1	341	7	19037	0.006330223	0.015897884	7.975282782	Actn2
GO:1901017	negative regulation of potassium ion transmembrane transporter activity	biological_process	1	341	7	19037	0.006330223	0.015897884	7.975282782	Actn2
GO:1901018	positive regulation of potassium ion transmembrane transporter activity	biological_process	1	341	7	19037	0.006330223	0.015897884	7.975282782	Actn2
GO:0072678	T cell migration	biological_process	1	341	7	19037	0.006330223	0.015897884	7.975282782	Ccr6
GO:0002360	T cell lineage commitment	biological_process	1	341	7	19037	0.006330223	0.015897884	7.975282782	Rag2
GO:0019787	ubiquitin-like protein transferase activity	molecular_function	1	341	7	19037	0.006330223	0.015897884	7.975282782	Ube2l6
GO:0031227	intrinsic component of endoplasmic reticulum membrane	cellular_component	1	341	7	19037	0.006330223	0.015897884	7.975282782	Cyp2e1
GO:0032224	positive regulation of synaptic transmission, cholinergic	biological_process	1	341	7	19037	0.006330223	0.015897884	7.975282782	Ngfr
GO:0061000	negative regulation of dendritic spine development	biological_process	1	341	7	19037	0.006330223	0.015897884	7.975282782	Ngfr
GO:0072341	modified amino acid binding	molecular_function	1	341	7	19037	0.006330223	0.015897884	7.975282782	Cbs
GO:0045359	positive regulation of interferon-beta biosynthetic process	biological_process	1	341	7	19037	0.006330223	0.015897884	7.975282782	Tlr3
GO:0097527	necroptotic signaling pathway	biological_process	1	341	7	19037	0.006330223	0.015897884	7.975282782	Tlr3
GO:0035280	miRNA loading onto RISC involved in gene silencing by miRNA	biological_process	1	341	7	19037	0.006330223	0.015897884	7.975282782	Adar
GO:0008235	metalloexopeptidase activity	molecular_function	1	341	7	19037	0.006330223	0.015897884	7.975282782	Lap3
GO:0031433	telethonin binding	molecular_function	1	341	7	19037	0.006330223	0.015897884	7.975282782	Csrp3
GO:0003337	mesenchymal to epithelial transition involved in metanephros morphogenesis	biological_process	1	341	7	19037	0.006330223	0.015897884	7.975282782	Six2
GO:0021516	dorsal spinal cord development	biological_process	1	341	7	19037	0.006330223	0.015897884	7.975282782	Rfx4
GO:0043305	negative regulation of mast cell degranulation	biological_process	1	341	7	19037	0.006330223	0.015897884	7.975282782	Lgals9
GO:2000562	negative regulation of CD4-positive, alpha-beta T cell proliferation	biological_process	1	341	7	19037	0.006330223	0.015897884	7.975282782	Lgals9
GO:0004126	cytidine deaminase activity	molecular_function	1	341	7	19037	0.006330223	0.015897884	7.975282782	Apobec2
GO:0009972	cytidine deamination	biological_process	1	341	7	19037	0.006330223	0.015897884	7.975282782	Apobec2
GO:0033135	regulation of peptidyl-serine phosphorylation	biological_process	1	341	7	19037	0.006330223	0.015897884	7.975282782	Hrc
GO:0043496	regulation of protein homodimerization activity	biological_process	1	341	7	19037	0.006330223	0.015897884	7.975282782	Aida
GO:0071985	multivesicular body sorting pathway	biological_process	1	341	7	19037	0.006330223	0.015897884	7.975282782	Mitd1
GO:0030550	acetylcholine receptor inhibitor activity	molecular_function	1	341	7	19037	0.006330223	0.015897884	7.975282782	Ly6e
GO:0009931	calcium-dependent protein serine/threonine kinase activity	molecular_function	1	341	7	19037	0.006330223	0.015897884	7.975282782	Camk4
GO:0002903	negative regulation of B cell apoptotic process	biological_process	1	341	7	19037	0.006330223	0.015897884	7.975282782	Hsh2d
GO:0006650	glycerophospholipid metabolic process	biological_process	1	341	7	19037	0.006330223	0.015897884	7.975282782	Pnpla3
GO:1902966	positive regulation of protein localization to early endosome	biological_process	1	341	7	19037	0.006330223	0.015897884	7.975282782	Dtx3l
GO:0033629	negative regulation of cell adhesion mediated by integrin	biological_process	1	341	7	19037	0.006330223	0.015897884	7.975282782	Serpine1
GO:0051918	negative regulation of fibrinolysis	biological_process	1	341	7	19037	0.006330223	0.015897884	7.975282782	Serpine1
GO:0071321	cellular response to cGMP	biological_process	1	341	7	19037	0.006330223	0.015897884	7.975282782	Serpine1
GO:0033691	sialic acid binding	molecular_function	1	341	7	19037	0.006330223	0.015897884	7.975282782	Fcnb
GO:0007259	JAK-STAT cascade	biological_process	2	341	22	19037	0.006815027	0.017004414	5.075179952	Socs1; Stat1
GO:0002218	activation of innate immune response	biological_process	2	341	22	19037	0.006815027	0.017004414	5.075179952	Trim5; Mb21d1
GO:0097194	execution phase of apoptosis	biological_process	2	341	22	19037	0.006815027	0.017004414	5.075179952	Casp12; Casp7
GO:0004298	threonine-type endopeptidase activity	molecular_function	2	341	22	19037	0.006815027	0.017004414	5.075179952	Psmb10; Psmb9
GO:0005839	proteasome core complex	cellular_component	2	341	22	19037	0.006815027	0.017004414	5.075179952	Psmb10; Psmb9
GO:0000266	mitochondrial fission	biological_process	2	341	22	19037	0.006815027	0.017004414	5.075179952	Mx1; Mx2
GO:0030199	collagen fibril organization	biological_process	3	341	43	19037	0.00720262	0.017913413	3.894905545	Acan; Col2a1; Col1a2
GO:0016459	myosin complex	cellular_component	3	341	43	19037	0.00720262	0.017913413	3.894905545	Myh6; Myl3; Myl4
GO:0097191	extrinsic apoptotic signaling pathway	biological_process	3	341	43	19037	0.00720262	0.017913413	3.894905545	Pml; Cd27; Tlr3
GO:0071222	cellular response to lipopolysaccharide	biological_process	8	341	190	19037	0.007418467	0.018430378	2.350609662	Plscr2; Klrk1; Cxcl10; Irgm; Cmpk2; Gbp2; Stat1; Serpine1
GO:0042742	defense response to bacterium	biological_process	6	341	126	19037	0.00764411	0.018970543	2.658427594	Defb4; Defb5; Isg15; Irgm; Rag2; Serpinb9
GO:0045582	positive regulation of T cell differentiation	biological_process	2	341	23	19037	0.007734655	0.019113045	4.854519954	Zap70; Cd27
GO:0010460	positive regulation of heart rate	biological_process	2	341	23	19037	0.007734655	0.019113045	4.854519954	Gch1; Hrc
GO:0043011	myeloid dendritic cell differentiation	biological_process	2	341	23	19037	0.007734655	0.019113045	4.854519954	Batf2; Camk4
GO:0006414	translational elongation	biological_process	2	341	23	19037	0.007734655	0.019113045	4.854519954	Eef1a2; Rplp2
GO:0030217	T cell differentiation	biological_process	3	341	44	19037	0.007813252	0.019286617	3.806384964	Ptpn22; Rag2; Cd3d
GO:0048146	positive regulation of fibroblast proliferation	biological_process	4	341	69	19037	0.007894788	0.019467062	3.236346636	Btc; Pml; Ngfr; Serpine1
GO:0051092	positive regulation of NF-kappaB transcription factor activity	biological_process	6	341	128	19037	0.008304894	0.019603485	2.616889663	Trim25; Cd40lg; Trim5; Eif2ak2; Tlr3; Lgals9
GO:0098797	plasma membrane protein complex	cellular_component	1	341	8	19037	0.008340824	0.019603485	6.978372434	Hfe2
GO:1990459	transferrin receptor binding	molecular_function	1	341	8	19037	0.008340824	0.019603485	6.978372434	Hfe2
GO:0008290	F-actin capping protein complex	cellular_component	1	341	8	19037	0.008340824	0.019603485	6.978372434	Carmil2
GO:0090091	positive regulation of extracellular matrix disassembly	biological_process	1	341	8	19037	0.008340824	0.019603485	6.978372434	Carmil2
GO:0006729	tetrahydrobiopterin biosynthetic process	biological_process	1	341	8	19037	0.008340824	0.019603485	6.978372434	Gch1
GO:0039536	negative regulation of RIG-I signaling pathway	biological_process	1	341	8	19037	0.008340824	0.019603485	6.978372434	Dhx58
GO:0034046	poly(G) binding	molecular_function	1	341	8	19037	0.008340824	0.019603485	6.978372434	Pnpt1
GO:0045348	positive regulation of MHC class II biosynthetic process	biological_process	1	341	8	19037	0.008340824	0.019603485	6.978372434	Cd40lg
GO:0030314	junctional membrane complex	cellular_component	1	341	8	19037	0.008340824	0.019603485	6.978372434	Trdn
GO:0051280	negative regulation of release of sequestered calcium ion into cytosol	biological_process	1	341	8	19037	0.008340824	0.019603485	6.978372434	Trdn
GO:0060316	positive regulation of ryanodine-sensitive calcium-release channel activity	biological_process	1	341	8	19037	0.008340824	0.019603485	6.978372434	Trdn
GO:0086036	regulation of cardiac muscle cell membrane potential	biological_process	1	341	8	19037	0.008340824	0.019603485	6.978372434	Trdn
GO:0030619	U1 snRNA binding	molecular_function	1	341	8	19037	0.008340824	0.019603485	6.978372434	Isg20
GO:0035726	common myeloid progenitor cell proliferation	biological_process	1	341	8	19037	0.008340824	0.019603485	6.978372434	RGD1563091
GO:0033089	positive regulation of T cell differentiation in thymus	biological_process	1	341	8	19037	0.008340824	0.019603485	6.978372434	Egr3
GO:0030240	skeletal muscle thin filament assembly	biological_process	1	341	8	19037	0.008340824	0.019603485	6.978372434	Myom2
GO:0016798	hydrolase activity, acting on glycosyl bonds	molecular_function	1	341	8	19037	0.008340824	0.019603485	6.978372434	Art2b
GO:0003231	cardiac ventricle development	biological_process	1	341	8	19037	0.008340824	0.019603485	6.978372434	Kcnk2
GO:0019227	neuronal action potential propagation	biological_process	1	341	8	19037	0.008340824	0.019603485	6.978372434	Cldn19
GO:0043297	apical junction assembly	biological_process	1	341	8	19037	0.008340824	0.019603485	6.978372434	Cldn19
GO:0042769	DNA damage response, detection of DNA damage	biological_process	1	341	8	19037	0.008340824	0.019603485	6.978372434	Dnaja1
GO:0010818	T cell chemotaxis	biological_process	1	341	8	19037	0.008340824	0.019603485	6.978372434	Cxcl10
GO:0046826	negative regulation of protein export from nucleus	biological_process	1	341	8	19037	0.008340824	0.019603485	6.978372434	Sp100
GO:0010837	regulation of keratinocyte proliferation	biological_process	1	341	8	19037	0.008340824	0.019603485	6.978372434	Bcl11b
GO:0072559	NLRP3 inflammasome complex	cellular_component	1	341	8	19037	0.008340824	0.019603485	6.978372434	Casp12
GO:0035195	gene silencing by miRNA	biological_process	1	341	8	19037	0.008340824	0.019603485	6.978372434	Mov10
GO:0097151	positive regulation of inhibitory postsynaptic potential	biological_process	1	341	8	19037	0.008340824	0.019603485	6.978372434	Abat
GO:0050702	interleukin-1 beta secretion	biological_process	1	341	8	19037	0.008340824	0.019603485	6.978372434	Gbp5
GO:0019957	C-C chemokine binding	molecular_function	1	341	8	19037	0.008340824	0.019603485	6.978372434	Ccr6
GO:0050897	cobalt ion binding	molecular_function	1	341	8	19037	0.008340824	0.019603485	6.978372434	Pml
GO:0043140	ATP-dependent 3'-5' DNA helicase activity	molecular_function	1	341	8	19037	0.008340824	0.019603485	6.978372434	Ascc3
GO:0030823	regulation of cGMP metabolic process	biological_process	1	341	8	19037	0.008340824	0.019603485	6.978372434	Cbs
GO:0010882	regulation of cardiac muscle contraction by calcium ion signaling	biological_process	1	341	8	19037	0.008340824	0.019603485	6.978372434	Tnni3
GO:0002456	T cell mediated immunity	biological_process	1	341	8	19037	0.008340824	0.019603485	6.978372434	Cd8a
GO:0044387	negative regulation of protein kinase activity by regulation of protein phosphorylation	biological_process	1	341	8	19037	0.008340824	0.019603485	6.978372434	Adar
GO:0072006	nephron development	biological_process	1	341	8	19037	0.008340824	0.019603485	6.978372434	Six2
GO:0033081	regulation of T cell differentiation in thymus	biological_process	1	341	8	19037	0.008340824	0.019603485	6.978372434	Lgals9
GO:0051353	positive regulation of oxidoreductase activity	biological_process	1	341	8	19037	0.008340824	0.019603485	6.978372434	Lgals9
GO:0071636	positive regulation of transforming growth factor beta production	biological_process	1	341	8	19037	0.008340824	0.019603485	6.978372434	Lgals9
GO:0045823	positive regulation of heart contraction	biological_process	1	341	8	19037	0.008340824	0.019603485	6.978372434	Hrc
GO:0031730	CCR5 chemokine receptor binding	molecular_function	1	341	8	19037	0.008340824	0.019603485	6.978372434	Stat1
GO:0032036	myosin heavy chain binding	molecular_function	1	341	8	19037	0.008340824	0.019603485	6.978372434	Mybpc3
GO:0050650	chondroitin sulfate proteoglycan biosynthetic process	biological_process	1	341	8	19037	0.008340824	0.019603485	6.978372434	Pxylp1
GO:0031232	extrinsic component of external side of plasma membrane	cellular_component	1	341	8	19037	0.008340824	0.019603485	6.978372434	Fcnb
GO:0050807	regulation of synapse organization	biological_process	1	341	8	19037	0.008340824	0.019603485	6.978372434	Lrrc4
GO:0010508	positive regulation of autophagy	biological_process	3	341	45	19037	0.008456938	0.019856167	3.721798631	Trim21; Rnf152; Irgm
GO:0010608	posttranscriptional regulation of gene expression	biological_process	2	341	24	19037	0.008723962	0.020379458	4.652248289	Parp9; Tdrd7
GO:0051537	2 iron, 2 sulfur cluster binding	molecular_function	2	341	24	19037	0.008723962	0.020379458	4.652248289	Cmah; Aox2
GO:0043539	protein serine/threonine kinase activator activity	molecular_function	2	341	24	19037	0.008723962	0.020379458	4.652248289	Irgm; Lgals9
GO:0019825	oxygen binding	molecular_function	2	341	24	19037	0.008723962	0.020379458	4.652248289	Cbs; Mb
GO:0010499	proteasomal ubiquitin-independent protein catabolic process	biological_process	2	341	24	19037	0.008723962	0.020379458	4.652248289	Psmb10; Psmb9
GO:0048839	inner ear development	biological_process	4	341	71	19037	0.008886351	0.020737813	3.145181942	RT1-S3; Col2a1; Atp2b2; Mnda
GO:0003727	single-stranded RNA binding	molecular_function	3	341	46	19037	0.009134363	0.021252126	3.640889966	Dhx58; Ddx58; Ifih1
GO:0071345	cellular response to cytokine stimulus	biological_process	3	341	46	19037	0.009134363	0.021252126	3.640889966	Socs1; Ccr7; Stat1
GO:0002062	chondrocyte differentiation	biological_process	3	341	46	19037	0.009134363	0.021252126	3.640889966	Col2a1; Wnt2b; Six2
GO:0042157	lipoprotein metabolic process	biological_process	2	341	25	19037	0.00978402	0.022672207	4.466158358	RGD1309808; Apol9a
GO:0060416	response to growth hormone	biological_process	2	341	25	19037	0.00978402	0.022672207	4.466158358	Pnpt1; Irf1
GO:0030521	androgen receptor signaling pathway	biological_process	2	341	25	19037	0.00978402	0.022672207	4.466158358	Dnaja1; Daxx
GO:0003785	actin monomer binding	molecular_function	2	341	25	19037	0.00978402	0.022672207	4.466158358	Myl3; Myl4
GO:0061844	antimicrobial humoral immune response mediated by antimicrobial peptide	biological_process	3	341	47	19037	0.00984619	0.022793387	3.563424222	Ccl12; Defb4; Defb5
GO:0001664	G-protein coupled receptor binding	molecular_function	4	341	73	19037	0.009960735	0.023035446	3.059012574	Ramp3; Dnaja1; Gna14; Fcnb
GO:0007266	Rho protein signal transduction	biological_process	4	341	74	19037	0.010529962	0.023541418	3.017674566	Rtkn; Sbk2; Ngfr; Col1a2
GO:0034765	regulation of ion transmembrane transport	biological_process	5	341	103	19037	0.010577705	0.023541418	2.710047547	Kcna2; Kcng2; Kcng4; Kcnj3; Kcnj11
GO:1901224	positive regulation of NIK/NF-kappaB signaling	biological_process	3	341	48	19037	0.010593058	0.023541418	3.489186217	Eif2ak2; Tlr3; Lgals9
GO:0055091	phospholipid homeostasis	biological_process	1	341	9	19037	0.010597718	0.023541418	6.202997719	Fabp3
GO:0010739	positive regulation of protein kinase A signaling	biological_process	1	341	9	19037	0.010597718	0.023541418	6.202997719	Ramp3
GO:0005826	actomyosin contractile ring	cellular_component	1	341	9	19037	0.010597718	0.023541418	6.202997719	Rtkn
GO:0034058	endosomal vesicle fusion	biological_process	1	341	9	19037	0.010597718	0.023541418	6.202997719	RGD1563091
GO:0032736	positive regulation of interleukin-13 production	biological_process	1	341	9	19037	0.010597718	0.023541418	6.202997719	RT1-S3
GO:0046703	natural killer cell lectin-like receptor binding	molecular_function	1	341	9	19037	0.010597718	0.023541418	6.202997719	RT1-S3
GO:0002221	pattern recognition receptor signaling pathway	biological_process	1	341	9	19037	0.010597718	0.023541418	6.202997719	Trim5
GO:0035767	endothelial cell chemotaxis	biological_process	1	341	9	19037	0.010597718	0.023541418	6.202997719	Egr3
GO:0030957	Tat protein binding	molecular_function	1	341	9	19037	0.010597718	0.023541418	6.202997719	Dnaja1
GO:0046825	regulation of protein export from nucleus	biological_process	1	341	9	19037	0.010597718	0.023541418	6.202997719	Ifi27
GO:0006164	purine nucleotide biosynthetic process	biological_process	1	341	9	19037	0.010597718	0.023541418	6.202997719	Oas1a
GO:0042118	endothelial cell activation	biological_process	1	341	9	19037	0.010597718	0.023541418	6.202997719	Cxcl10
GO:1900165	negative regulation of interleukin-6 secretion	biological_process	1	341	9	19037	0.010597718	0.023541418	6.202997719	Ptpn22
GO:0002741	positive regulation of cytokine secretion involved in immune response	biological_process	1	341	9	19037	0.010597718	0.023541418	6.202997719	Tnfrsf14
GO:0071774	response to fibroblast growth factor	biological_process	1	341	9	19037	0.010597718	0.023541418	6.202997719	Col2a1
GO:0009117	nucleotide metabolic process	biological_process	1	341	9	19037	0.010597718	0.023541418	6.202997719	Nt5c3a
GO:0046085	adenosine metabolic process	biological_process	1	341	9	19037	0.010597718	0.023541418	6.202997719	Nt5c3a
GO:0097264	self proteolysis	biological_process	1	341	9	19037	0.010597718	0.023541418	6.202997719	Casp12
GO:0032725	positive regulation of granulocyte macrophage colony-stimulating factor production	biological_process	1	341	9	19037	0.010597718	0.023541418	6.202997719	Ddx58
GO:0042135	neurotransmitter catabolic process	biological_process	1	341	9	19037	0.010597718	0.023541418	6.202997719	Abat
GO:0070474	positive regulation of uterine smooth muscle contraction	biological_process	1	341	9	19037	0.010597718	0.023541418	6.202997719	Abat
GO:0070197	meiotic attachment of telomere to nuclear envelope	biological_process	1	341	9	19037	0.010597718	0.023541418	6.202997719	Majin
GO:0009142	nucleoside triphosphate biosynthetic process	biological_process	1	341	9	19037	0.010597718	0.023541418	6.202997719	Cmpk2
GO:0033129	positive regulation of histone phosphorylation	biological_process	1	341	9	19037	0.010597718	0.023541418	6.202997719	Daxx
GO:0043546	molybdopterin cofactor binding	molecular_function	1	341	9	19037	0.010597718	0.023541418	6.202997719	Aox2
GO:0021587	cerebellum morphogenesis	biological_process	1	341	9	19037	0.010597718	0.023541418	6.202997719	Cbs
GO:0050667	homocysteine metabolic process	biological_process	1	341	9	19037	0.010597718	0.023541418	6.202997719	Cbs
GO:0060113	inner ear receptor cell differentiation	biological_process	1	341	9	19037	0.010597718	0.023541418	6.202997719	Atp2b2
GO:0045080	positive regulation of chemokine biosynthetic process	biological_process	1	341	9	19037	0.010597718	0.023541418	6.202997719	Tlr3
GO:0035748	myelin sheath abaxonal region	cellular_component	1	341	9	19037	0.010597718	0.023541418	6.202997719	Cnp
GO:0050691	regulation of defense response to virus by host	biological_process	1	341	9	19037	0.010597718	0.023541418	6.202997719	Zc3hav1
GO:0038066	p38MAPK cascade	biological_process	1	341	9	19037	0.010597718	0.023541418	6.202997719	Lgals9
GO:0010881	regulation of cardiac muscle contraction by regulation of the release of sequestered calcium ion	biological_process	1	341	9	19037	0.010597718	0.023541418	6.202997719	Hrc
GO:0015108	chloride transmembrane transporter activity	molecular_function	1	341	9	19037	0.010597718	0.023541418	6.202997719	Slc26a3
GO:0051923	sulfation	biological_process	1	341	9	19037	0.010597718	0.023541418	6.202997719	Sult1d1
GO:0033523	histone H2B ubiquitination	biological_process	1	341	9	19037	0.010597718	0.023541418	6.202997719	Dtx3l
GO:0051549	positive regulation of keratinocyte migration	biological_process	1	341	9	19037	0.010597718	0.023541418	6.202997719	Serpine1
GO:0071248	cellular response to metal ion	biological_process	1	341	9	19037	0.010597718	0.023541418	6.202997719	Serpine1
GO:0004540	ribonuclease activity	molecular_function	2	341	26	19037	0.010915772	0.024085662	4.294383036	Rnase2; Samhd1
GO:0045954	positive regulation of natural killer cell mediated cytotoxicity	biological_process	2	341	26	19037	0.010915772	0.024085662	4.294383036	Slamf6; Klrk1
GO:0048477	oogenesis	biological_process	2	341	26	19037	0.010915772	0.024085662	4.294383036	Spo11; Marf1
GO:0005771	multivesicular body	cellular_component	2	341	26	19037	0.010915772	0.024085662	4.294383036	Bst2; Zp2
GO:0005251	delayed rectifier potassium channel activity	molecular_function	2	341	26	19037	0.010915772	0.024085662	4.294383036	Kcna2; Kcng4
GO:0045662	negative regulation of myoblast differentiation	biological_process	2	341	26	19037	0.010915772	0.024085662	4.294383036	Cxcl10; Csrp3
GO:1902042	negative regulation of extrinsic apoptotic signaling pathway via death domain receptors	biological_process	2	341	26	19037	0.010915772	0.024085662	4.294383036	LOC100912218; Serpine1
GO:0030674	protein binding, bridging	molecular_function	4	341	75	19037	0.011121055	0.024515181	2.977438905	Trdn; Trim5; Tnnt2; Col1a2
GO:0008270	zinc ion binding	molecular_function	20	341	682	19037	0.011607559	0.025563212	1.637154823	LOC103689945; Trim30c; Trafd1; Gch1; Dhx58; Trim21; Trim25; Trim29; Trim55; Trim5; Samhd1; Ddx58; Znfx1; Rag2; Pml; Vat1l; Apobec2; Tnfsf10; Ifih1; Cpxm1
GO:0009408	response to heat	biological_process	4	341	76	19037	0.011734384	0.025793294	2.938262077	Dnaja1; Myh6; Irf1; Ckm
GO:0071300	cellular response to retinoic acid	biological_process	4	341	76	19037	0.011734384	0.025793294	2.938262077	Col2a1; Irf1; Col1a2; Krt13
GO:0009612	response to mechanical stimulus	biological_process	5	341	106	19037	0.01207499	0.026439554	2.633348088	Acan; Eif2ak2; Kcnk2; Col2a1; Stat1
GO:0071353	cellular response to interleukin-4	biological_process	2	341	27	19037	0.012120038	0.026439554	4.135331813	Tcf7; Pml
GO:0045648	positive regulation of erythrocyte differentiation	biological_process	2	341	27	19037	0.012120038	0.026439554	4.135331813	Isg15; Stat1
GO:0033017	sarcoplasmic reticulum membrane	cellular_component	2	341	27	19037	0.012120038	0.026439554	4.135331813	Sln; Hrc
GO:0001782	B cell homeostasis	biological_process	2	341	27	19037	0.012120038	0.026439554	4.135331813	Tnfrsf13b; Tnfrsf13c
GO:0097225	sperm midpiece	cellular_component	2	341	27	19037	0.012120038	0.026439554	4.135331813	Ccr6; Slc26a3
GO:0017144	drug metabolic process	biological_process	2	341	27	19037	0.012120038	0.026439554	4.135331813	Cyp2e1; Aox2
GO:0043027	cysteine-type endopeptidase inhibitor activity involved in apoptotic process	molecular_function	2	341	27	19037	0.012120038	0.026439554	4.135331813	Cd27; Serpinb9
GO:0019894	kinesin binding	molecular_function	3	341	50	19037	0.012194339	0.026551447	3.349618768	Kcna2; Jakmip1; Daxx
GO:0005044	scavenger receptor activity	molecular_function	3	341	50	19037	0.012194339	0.026551447	3.349618768	Cd5; Cd6; Lgals3bp
GO:0016020	membrane	cellular_component	33	341	1268	19037	0.012249715	0.026646883	1.452910349	RGD1309808; Zap70; Igsf1; Tmem106a; Faxdc2; Oas2; Oas3; Oasl; RGD1305184; Apol11a; Dnaja1; Oas1a; Oas1b; Oas1i; Ifi47; Otop1; Cmah; Apol9a; Cd27; Cnp; Lgals3bp; Ogfr; Aida; LOC100910979; Ly6e; Mx1; Mx2; Grik4; Rnf213; Pnpla3; Oasl2; Slc26a3; Stmn2
GO:0005829	cytosol	cellular_component	72	341	3175	19037	0.012800117	0.027443375	1.265997645	Cmtr1; Usp18; Fabp3; Usp25; Zap70; Cd79b; Gch1; Pnpt1; Bst2; Trim25; Herc6; Trdn; Dao; RGD1563091; Oas2; Oas3; Oasl; Rnf114; Spats2l; Parp9; Abtb2; LOC500956; Eif2ak2; Mb21d1; Skap1; Hrh1; Dnaja1; Oas1a; Oas1b; Oas1i; Ifit1bl; Pax5; Casp12; Ddx3y; Ddx58; Mov10; Zbp1; Irf7; Irf9; Irgm; Casp7; Gbp1; Gbp2; Gbp4; Daxx; Aox2; Pml; Ascc3; Cbs; Kcnj11; Cnp; Lap3; Zc3hav1; Lgals9; Stat1; Stat2; Pgam2; Ca…
GO:0009314	response to radiation	biological_process	3	341	51	19037	0.013049901	0.027443375	3.283939969	Acan; Ccr4; Krt13
GO:0080009	mRNA methylation	biological_process	1	341	10	19037	0.013091489	0.027443375	5.582697947	Cmtr1
GO:0046638	positive regulation of alpha-beta T cell differentiation	biological_process	1	341	10	19037	0.013091489	0.027443375	5.582697947	Zap70
GO:0000737	DNA catabolic process, endonucleolytic	biological_process	1	341	10	19037	0.013091489	0.027443375	5.582697947	Spo11
GO:0051639	actin filament network formation	biological_process	1	341	10	19037	0.013091489	0.027443375	5.582697947	Carmil2
GO:0050662	coenzyme binding	molecular_function	1	341	10	19037	0.013091489	0.027443375	5.582697947	Gch1
GO:0032480	negative regulation of type I interferon production	biological_process	1	341	10	19037	0.013091489	0.027443375	5.582697947	Dhx58
GO:0030166	proteoglycan biosynthetic process	biological_process	1	341	10	19037	0.013091489	0.027443375	5.582697947	Acan
GO:0045657	positive regulation of monocyte differentiation	biological_process	1	341	10	19037	0.013091489	0.027443375	5.582697947	Csf1
GO:0002860	positive regulation of natural killer cell mediated cytotoxicity directed against tumor cell target	biological_process	1	341	10	19037	0.013091489	0.027443375	5.582697947	Klrk1
GO:0046425	regulation of JAK-STAT cascade	biological_process	1	341	10	19037	0.013091489	0.027443375	5.582697947	Socs1
GO:0044224	juxtaparanode region of axon	cellular_component	1	341	10	19037	0.013091489	0.027443375	5.582697947	Kcna2
GO:0097237	cellular response to toxic substance	biological_process	1	341	10	19037	0.013091489	0.027443375	5.582697947	Abtb2
GO:0031301	integral component of organelle membrane	cellular_component	1	341	10	19037	0.013091489	0.027443375	5.582697947	Rnf152
GO:0033689	negative regulation of osteoblast proliferation	biological_process	1	341	10	19037	0.013091489	0.027443375	5.582697947	Eif2ak2
GO:2000774	positive regulation of cellular senescence	biological_process	1	341	10	19037	0.013091489	0.027443375	5.582697947	Mb21d1
GO:0071420	cellular response to histamine	biological_process	1	341	10	19037	0.013091489	0.027443375	5.582697947	Hrh1
GO:0034145	positive regulation of toll-like receptor 4 signaling pathway	biological_process	1	341	10	19037	0.013091489	0.027443375	5.582697947	Ptpn22
GO:0003417	growth plate cartilage development	biological_process	1	341	10	19037	0.013091489	0.027443375	5.582697947	Col2a1
GO:0014883	transition between fast and slow fiber	biological_process	1	341	10	19037	0.013091489	0.027443375	5.582697947	Tnnc1
GO:0016614	oxidoreductase activity, acting on CH-OH group of donors	molecular_function	1	341	10	19037	0.013091489	0.027443375	5.582697947	Aox2
GO:0048406	nerve growth factor binding	molecular_function	1	341	10	19037	0.013091489	0.027443375	5.582697947	Ngfr
GO:0006940	regulation of smooth muscle contraction	biological_process	1	341	10	19037	0.013091489	0.027443375	5.582697947	Tnni3
GO:0042428	serotonin metabolic process	biological_process	1	341	10	19037	0.013091489	0.027443375	5.582697947	Atp2b2
GO:0000290	deadenylation-dependent decapping of nuclear-transcribed mRNA	biological_process	1	341	10	19037	0.013091489	0.027443375	5.582697947	Dcp2
GO:0050863	regulation of T cell activation	biological_process	1	341	10	19037	0.013091489	0.027443375	5.582697947	Sit1
GO:0032330	regulation of chondrocyte differentiation	biological_process	1	341	10	19037	0.013091489	0.027443375	5.582697947	Six2
GO:0071203	WASH complex	cellular_component	1	341	10	19037	0.013091489	0.027443375	5.582697947	RGD1309995
GO:0039702	viral budding via host ESCRT complex	biological_process	1	341	10	19037	0.013091489	0.027443375	5.582697947	Mitd1
GO:0042415	norepinephrine metabolic process	biological_process	1	341	10	19037	0.013091489	0.027443375	5.582697947	Ly6e
GO:0095500	acetylcholine receptor signaling pathway	biological_process	1	341	10	19037	0.013091489	0.027443375	5.582697947	Ly6e
GO:0007270	neuron-neuron synaptic transmission	biological_process	1	341	10	19037	0.013091489	0.027443375	5.582697947	Camk4
GO:0004185	serine-type carboxypeptidase activity	molecular_function	1	341	10	19037	0.013091489	0.027443375	5.582697947	Cpxm1
GO:0006654	phosphatidic acid biosynthetic process	biological_process	1	341	10	19037	0.013091489	0.027443375	5.582697947	Pnpla3
GO:0019774	proteasome core complex, beta-subunit complex	cellular_component	1	341	10	19037	0.013091489	0.027443375	5.582697947	Psmb9
GO:0030280	structural constituent of epidermis	molecular_function	1	341	10	19037	0.013091489	0.027443375	5.582697947	Krt2
GO:0051444	negative regulation of ubiquitin-protein transferase activity	biological_process	1	341	10	19037	0.013091489	0.027443375	5.582697947	Dtx3l
GO:0070849	response to epidermal growth factor	biological_process	1	341	10	19037	0.013091489	0.027443375	5.582697947	Serpine1
GO:0044309	neuron spine	cellular_component	1	341	10	19037	0.013091489	0.027443375	5.582697947	Lrrc4
GO:0006338	chromatin remodeling	biological_process	5	341	108	19037	0.013152378	0.027545996	2.584582383	Sp100; Sp110; Sp140; Tox2; Daxx
GO:0001530	lipopolysaccharide binding	molecular_function	2	341	28	19037	0.013397521	0.028008586	3.987641391	Rnase2; Cd6
GO:0005070	SH3/SH2 adaptor activity	molecular_function	2	341	28	19037	0.013397521	0.028008586	3.987641391	Skap1; Hsh2d
GO:0031625	ubiquitin protein ligase binding	molecular_function	11	341	322	19037	0.013712359	0.028640837	1.907132839	Usp25; Isg15; Abtb2; Dnaja1; Ptpn22; Tnfrsf14; Ddx58; Daxx; Pml; Ngfr; Cbs
GO:0042127	regulation of cell proliferation	biological_process	9	341	247	19037	0.013922664	0.029053805	2.034181438	Zap70; Tcf7; Srms; Cxcl10; Tnfrsf14; Irf1; Ngfr; Cd27; Serpine1
GO:0031225	anchored component of membrane	cellular_component	3	341	52	19037	0.0139428	0.029069542	3.220787277	Hfe2; Bst2; Ly6e
GO:0019221	cytokine-mediated signaling pathway	biological_process	6	341	142	19037	0.014161072	0.029497973	2.358886457	Osmr; Rtn4r; Socs1; Podnl1; Stat1; Lrrc4
GO:0016787	hydrolase activity	molecular_function	5	341	110	19037	0.014295346	0.029724017	2.537589976	Dhx58; Ddx58; Cmah; Pgam2; Ifih1
GO:0006469	negative regulation of protein kinase activity	biological_process	5	341	110	19037	0.014295346	0.029724017	2.537589976	Rtn4r; Socs1; Podnl1; LOC100912218; Lrrc4
GO:0016525	negative regulation of angiogenesis	biological_process	4	341	80	19037	0.014417246	0.029950498	2.791348974	Cxcl10; Pml; Ngfr; Stat1
GO:0099132	ATP hydrolysis coupled cation transmembrane transport	biological_process	2	341	29	19037	0.014748809	0.030502018	3.850136515	Atp13a5; Atp2b2
GO:0042056	chemoattractant activity	molecular_function	2	341	29	19037	0.014748809	0.030502018	3.850136515	Defb4; Defb5
GO:0045765	regulation of angiogenesis	biological_process	2	341	29	19037	0.014748809	0.030502018	3.850136515	Sp100; Serpine1
GO:0008234	cysteine-type peptidase activity	molecular_function	2	341	29	19037	0.014748809	0.030502018	3.850136515	Casp12; Casp7
GO:0010038	response to metal ion	biological_process	2	341	29	19037	0.014748809	0.030502018	3.850136515	Tnnc1; Daxx
GO:0051091	positive regulation of DNA binding transcription factor activity	biological_process	5	341	112	19037	0.015505746	0.031543952	2.492275869	Trim21; Trim25; Trim5; Sp100; Csrp3
GO:0036122	BMP binding	molecular_function	1	341	11	19037	0.015812978	0.031543952	5.075179952	Hfe2
GO:0016528	sarcoplasm	cellular_component	1	341	11	19037	0.015812978	0.031543952	5.075179952	Fabp3
GO:2000772	regulation of cellular senescence	biological_process	1	341	11	19037	0.015812978	0.031543952	5.075179952	Pnpt1
GO:0008191	metalloendopeptidase inhibitor activity	molecular_function	1	341	11	19037	0.015812978	0.031543952	5.075179952	Bst2
GO:0010744	positive regulation of macrophage derived foam cell differentiation	biological_process	1	341	11	19037	0.015812978	0.031543952	5.075179952	Csf1
GO:0022038	corpus callosum development	biological_process	1	341	11	19037	0.015812978	0.031543952	5.075179952	Rtn4r
GO:0017145	stem cell division	biological_process	1	341	11	19037	0.015812978	0.031543952	5.075179952	RGD1563091
GO:0007143	female meiotic nuclear division	biological_process	1	341	11	19037	0.015812978	0.031543952	5.075179952	Marf1
GO:0009435	NAD biosynthetic process	biological_process	1	341	11	19037	0.015812978	0.031543952	5.075179952	Nampt
GO:0051223	regulation of protein transport	biological_process	1	341	11	19037	0.015812978	0.031543952	5.075179952	Dnaja1
GO:0007035	vacuolar acidification	biological_process	1	341	11	19037	0.015812978	0.031543952	5.075179952	Tcirg1
GO:0060174	limb bud formation	biological_process	1	341	11	19037	0.015812978	0.031543952	5.075179952	Col2a1
GO:0060272	embryonic skeletal joint morphogenesis	biological_process	1	341	11	19037	0.015812978	0.031543952	5.075179952	Col2a1
GO:0007567	parturition	biological_process	1	341	11	19037	0.015812978	0.031543952	5.075179952	Rxfp1
GO:0044754	autolysosome	cellular_component	1	341	11	19037	0.015812978	0.031543952	5.075179952	Irgm
GO:0050700	CARD domain binding	molecular_function	1	341	11	19037	0.015812978	0.031543952	5.075179952	Irgm
GO:0031432	titin binding	molecular_function	1	341	11	19037	0.015812978	0.031543952	5.075179952	Actn2
GO:0071168	protein localization to chromatin	biological_process	1	341	11	19037	0.015812978	0.031543952	5.075179952	Daxx
GO:0010193	response to ozone	biological_process	1	341	11	19037	0.015812978	0.031543952	5.075179952	Cyp2e1
GO:0010761	fibroblast migration	biological_process	1	341	11	19037	0.015812978	0.031543952	5.075179952	Pml
GO:0032206	positive regulation of telomere maintenance	biological_process	1	341	11	19037	0.015812978	0.031543952	5.075179952	Pml
GO:0070852	cell body fiber	cellular_component	1	341	11	19037	0.015812978	0.031543952	5.075179952	Kcnj11
GO:0001771	immunological synapse formation	biological_process	1	341	11	19037	0.015812978	0.031543952	5.075179952	Cd6
GO:0005675	holo TFIIH complex	cellular_component	1	341	11	19037	0.015812978	0.031543952	5.075179952	Gtf2f2
GO:0045086	positive regulation of interleukin-2 biosynthetic process	biological_process	1	341	11	19037	0.015812978	0.031543952	5.075179952	Cd3e
GO:0016442	RISC complex	cellular_component	1	341	11	19037	0.015812978	0.031543952	5.075179952	Dcp2
GO:0003300	cardiac muscle hypertrophy	biological_process	1	341	11	19037	0.015812978	0.031543952	5.075179952	Csrp3
GO:0010831	positive regulation of myotube differentiation	biological_process	1	341	11	19037	0.015812978	0.031543952	5.075179952	Csrp3
GO:0070613	regulation of protein processing	biological_process	1	341	11	19037	0.015812978	0.031543952	5.075179952	Rfx4
GO:0034142	toll-like receptor 4 signaling pathway	biological_process	1	341	11	19037	0.015812978	0.031543952	5.075179952	Lgals9
GO:1900744	regulation of p38MAPK cascade	biological_process	1	341	11	19037	0.015812978	0.031543952	5.075179952	Lgals9
GO:0080111	DNA demethylation	biological_process	1	341	11	19037	0.015812978	0.031543952	5.075179952	Apobec2
GO:0043589	skin morphogenesis	biological_process	1	341	11	19037	0.015812978	0.031543952	5.075179952	Col1a2
GO:0031960	response to corticosteroid	biological_process	1	341	11	19037	0.015812978	0.031543952	5.075179952	Grik4
GO:0006024	glycosaminoglycan biosynthetic process	biological_process	1	341	11	19037	0.015812978	0.031543952	5.075179952	Pxylp1
GO:0019531	oxalate transmembrane transporter activity	molecular_function	1	341	11	19037	0.015812978	0.031543952	5.075179952	Slc26a3
GO:0019532	oxalate transport	biological_process	1	341	11	19037	0.015812978	0.031543952	5.075179952	Slc26a3
GO:0071377	cellular response to glucagon stimulus	biological_process	1	341	11	19037	0.015812978	0.031543952	5.075179952	Serpine1
GO:0090399	replicative senescence	biological_process	1	341	11	19037	0.015812978	0.031543952	5.075179952	Serpine1
GO:0001867	complement activation, lectin pathway	biological_process	1	341	11	19037	0.015812978	0.031543952	5.075179952	Fcnb
GO:0004715	non-membrane spanning protein tyrosine kinase activity	molecular_function	3	341	54	19037	0.015842624	0.031548556	3.10149886	Zap70; Srms; Eif2ak2
GO:0035914	skeletal muscle cell differentiation	biological_process	3	341	54	19037	0.015842624	0.031548556	3.10149886	Sap30; Pax5; Ngfr
GO:0010977	negative regulation of neuron projection development	biological_process	4	341	82	19037	0.015901201	0.031637908	2.723267291	RT1-A2; Rtn4r; Ngfr; Stmn2
GO:0007129	synapsis	biological_process	2	341	30	19037	0.016174385	0.032070859	3.721798631	Spo11; Majin
GO:0033280	response to vitamin D	biological_process	2	341	30	19037	0.016174385	0.032070859	3.721798631	Trim25; Cxcl10
GO:0001958	endochondral ossification	biological_process	2	341	30	19037	0.016174385	0.032070859	3.721798631	Col2a1; Cbs
GO:0017022	myosin binding	molecular_function	2	341	30	19037	0.016174385	0.032070859	3.721798631	Mybpc1; Mybpc3
GO:0005911	cell-cell junction	cellular_component	7	341	181	19037	0.016549297	0.032786075	2.159054455	Zap70; Carmil2; Skap1; Mlc1; Themis; Ngfr; Cd3e
GO:0043588	skin development	biological_process	3	341	55	19037	0.016850491	0.033354145	3.045107971	Bcl11b; Ngfr; LOC103694381
GO:0098839	postsynaptic density membrane	cellular_component	2	341	31	19037	0.017674625	0.034955471	3.601740611	Atp2b2; Grik4
GO:0030212	hyaluronan metabolic process	biological_process	1	341	12	19037	0.018753276	0.035623506	4.652248289	Itih4
GO:0015909	long-chain fatty acid transport	biological_process	1	341	12	19037	0.018753276	0.035623506	4.652248289	Fabp3
GO:0045926	negative regulation of growth	biological_process	1	341	12	19037	0.018753276	0.035623506	4.652248289	Pnpt1
GO:0036503	ERAD pathway	biological_process	1	341	12	19037	0.018753276	0.035623506	4.652248289	Trim25
GO:0030865	cortical cytoskeleton organization	biological_process	1	341	12	19037	0.018753276	0.035623506	4.652248289	Rtkn
GO:0048681	negative regulation of axon regeneration	biological_process	1	341	12	19037	0.018753276	0.035623506	4.652248289	Rtn4r
GO:0097028	dendritic cell differentiation	biological_process	1	341	12	19037	0.018753276	0.035623506	4.652248289	Cd40lg
GO:0030101	natural killer cell activation	biological_process	1	341	12	19037	0.018753276	0.035623506	4.652248289	Klrk1
GO:0004527	exonuclease activity	molecular_function	1	341	12	19037	0.018753276	0.035623506	4.652248289	Isg20
GO:0034705	potassium channel complex	cellular_component	1	341	12	19037	0.018753276	0.035623506	4.652248289	Kcna2
GO:0006950	response to stress	biological_process	1	341	12	19037	0.018753276	0.035623506	4.652248289	Abtb2
GO:0097449	astrocyte projection	cellular_component	1	341	12	19037	0.018753276	0.035623506	4.652248289	Kcnk2
GO:0008347	glial cell migration	biological_process	1	341	12	19037	0.018753276	0.035623506	4.652248289	Vcan
GO:0030898	actin-dependent ATPase activity	molecular_function	1	341	12	19037	0.018753276	0.035623506	4.652248289	Myh6
GO:0016471	vacuolar proton-transporting V-type ATPase complex	cellular_component	1	341	12	19037	0.018753276	0.035623506	4.652248289	Tcirg1
GO:0070072	vacuolar proton-transporting V-type ATPase complex assembly	biological_process	1	341	12	19037	0.018753276	0.035623506	4.652248289	Tcirg1
GO:0045236	CXCR chemokine receptor binding	molecular_function	1	341	12	19037	0.018753276	0.035623506	4.652248289	Cxcl10
GO:0021670	lateral ventricle development	biological_process	1	341	12	19037	0.018753276	0.035623506	4.652248289	Pax5
GO:0030903	notochord development	biological_process	1	341	12	19037	0.018753276	0.035623506	4.652248289	Col2a1
GO:0051536	iron-sulfur cluster binding	molecular_function	1	341	12	19037	0.018753276	0.035623506	4.652248289	Abat
GO:0005247	voltage-gated chloride channel activity	molecular_function	1	341	12	19037	0.018753276	0.035623506	4.652248289	Clcn4
GO:0050684	regulation of mRNA processing	biological_process	1	341	12	19037	0.018753276	0.035623506	4.652248289	Srpk3
GO:0043254	regulation of protein complex assembly	biological_process	1	341	12	19037	0.018753276	0.035623506	4.652248289	Irgm
GO:0005740	mitochondrial envelope	cellular_component	1	341	12	19037	0.018753276	0.035623506	4.652248289	Cyp27a1
GO:2000009	negative regulation of protein localization to cell surface	biological_process	1	341	12	19037	0.018753276	0.035623506	4.652248289	Actn2
GO:0008568	microtubule-severing ATPase activity	molecular_function	1	341	12	19037	0.018753276	0.035623506	4.652248289	Atad1
GO:0050848	regulation of calcium-mediated signaling	biological_process	1	341	12	19037	0.018753276	0.035623506	4.652248289	Gbp1
GO:0050927	positive regulation of positive chemotaxis	biological_process	1	341	12	19037	0.018753276	0.035623506	4.652248289	Ccr4
GO:0008432	JUN kinase binding	molecular_function	1	341	12	19037	0.018753276	0.035623506	4.652248289	Daxx
GO:0033151	V(D)J recombination	biological_process	1	341	12	19037	0.018753276	0.035623506	4.652248289	Rag2
GO:0006977	DNA damage response, signal transduction by p53 class mediator resulting in cell cycle arrest	biological_process	1	341	12	19037	0.018753276	0.035623506	4.652248289	Pml
GO:0045334	clathrin-coated endocytic vesicle	cellular_component	1	341	12	19037	0.018753276	0.035623506	4.652248289	Ngfr
GO:0010467	gene expression	biological_process	1	341	12	19037	0.018753276	0.035623506	4.652248289	LOC103694381
GO:0019855	calcium channel inhibitor activity	molecular_function	1	341	12	19037	0.018753276	0.035623506	4.652248289	Tnni3
GO:0021707	cerebellar granule cell differentiation	biological_process	1	341	12	19037	0.018753276	0.035623506	4.652248289	Atp2b2
GO:0050072	m7G(5')pppN diphosphatase activity	molecular_function	1	341	12	19037	0.018753276	0.035623506	4.652248289	Dcp2
GO:0051764	actin crosslink formation	biological_process	1	341	12	19037	0.018753276	0.035623506	4.652248289	Tnnt2
GO:0031143	pseudopodium	cellular_component	1	341	12	19037	0.018753276	0.035623506	4.652248289	Cnp
GO:0046007	negative regulation of activated T cell proliferation	biological_process	1	341	12	19037	0.018753276	0.035623506	4.652248289	Lgals9
GO:0071639	positive regulation of monocyte chemotactic protein-1 production	biological_process	1	341	12	19037	0.018753276	0.035623506	4.652248289	Lgals9
GO:0060314	regulation of ryanodine-sensitive calcium-release channel activity	biological_process	1	341	12	19037	0.018753276	0.035623506	4.652248289	Hrc
GO:0035591	signaling adaptor activity	molecular_function	1	341	12	19037	0.018753276	0.035623506	4.652248289	Hsh2d
GO:0008271	secondary active sulfate transmembrane transporter activity	molecular_function	1	341	12	19037	0.018753276	0.035623506	4.652248289	Slc26a3
GO:0015116	sulfate transmembrane transporter activity	molecular_function	1	341	12	19037	0.018753276	0.035623506	4.652248289	Slc26a3
GO:0010390	histone monoubiquitination	biological_process	1	341	12	19037	0.018753276	0.035623506	4.652248289	Dtx3l
GO:0001913	T cell mediated cytotoxicity	biological_process	1	341	12	19037	0.018753276	0.035623506	4.652248289	Serpinb9
GO:0034616	response to laminar fluid shear stress	biological_process	1	341	12	19037	0.018753276	0.035623506	4.652248289	Serpine1
GO:0045576	mast cell activation	biological_process	1	341	12	19037	0.018753276	0.035623506	4.652248289	Serpine1
GO:0030183	B cell differentiation	biological_process	3	341	57	19037	0.018984291	0.035914543	2.938262077	Cd79b; Cd40lg; Rag2
GO:0048538	thymus development	biological_process	3	341	57	19037	0.018984291	0.035914543	2.938262077	Carmil2; Bcl11b; Psmb9
GO:0051865	protein autoubiquitination	biological_process	3	341	57	19037	0.018984291	0.035914543	2.938262077	Trim21; Rnf213; Dtx3l
GO:0051603	proteolysis involved in cellular protein catabolic process	biological_process	3	341	57	19037	0.018984291	0.035914543	2.938262077	Psmb10; Ctsw; Psmb9
GO:0000502	proteasome complex	cellular_component	3	341	57	19037	0.018984291	0.035914543	2.938262077	Psmb9; Psme1; Psme2
GO:0016605	PML body	cellular_component	4	341	86	19037	0.01916694	0.036230384	2.596603696	Isg20; Sp100; Daxx; Pml
GO:0071356	cellular response to tumor necrosis factor	biological_process	6	341	151	19037	0.019211169	0.036268214	2.218290575	Ccl12; Cd40lg; Col2a1; Irf1; Daxx; Kcnj11
GO:0004857	enzyme inhibitor activity	molecular_function	2	341	32	19037	0.01924981	0.036268214	3.489186217	Parp9; Dtx3l
GO:2001238	positive regulation of extrinsic apoptotic signaling pathway	biological_process	2	341	32	19037	0.01924981	0.036268214	3.489186217	Pml; Tnfsf10
GO:0043029	T cell homeostasis	biological_process	2	341	32	19037	0.01924981	0.036268214	3.489186217	Gpr174; Sit1
GO:0043123	positive regulation of I-kappaB kinase/NF-kappaB signaling	biological_process	5	341	118	19037	0.019559204	0.03682108	2.365549978	Trim25; Trim5; Tlr3; Zc3hav1; Tnfsf10
GO:0031012	extracellular matrix	cellular_component	8	341	224	19037	0.019976075	0.037575208	1.993820695	Acan; Podnl1; Vcan; Col2a1; Zp2; Lgals3bp; Col1a2; Serpine1
GO:0002244	hematopoietic progenitor cell differentiation	biological_process	4	341	87	19037	0.020047144	0.037678182	2.566757677	Herc6; RGD1563091; Tnfrsf13b; Adar
GO:0032760	positive regulation of tumor necrosis factor production	biological_process	3	341	58	19037	0.02011101	0.037736756	2.887602386	RT1-S3; Tlr3; Lgals9
GO:0004197	cysteine-type endopeptidase activity	molecular_function	3	341	58	19037	0.02011101	0.037736756	2.887602386	Casp12; Casp7; Ctsw
GO:0000982	transcription factor activity, RNA polymerase II proximal promoter sequence-specific DNA binding	molecular_function	2	341	33	19037	0.020900126	0.038995546	3.383453301	Batf2; Irf7
GO:0006513	protein monoubiquitination	biological_process	2	341	33	19037	0.020900126	0.038995546	3.383453301	Trim21; Trim25
GO:0040008	regulation of growth	biological_process	2	341	33	19037	0.020900126	0.038995546	3.383453301	Socs1; Ogfr
GO:0001819	positive regulation of cytokine production	biological_process	2	341	33	19037	0.020900126	0.038995546	3.383453301	Eif2ak2; Lgals9
GO:0008585	female gonad development	biological_process	2	341	33	19037	0.020900126	0.038995546	3.383453301	Tox2; Serpine1
GO:0042110	T cell activation	biological_process	2	341	33	19037	0.020900126	0.038995546	3.383453301	Cd8a; Hsh2d
GO:0010498	proteasomal protein catabolic process	biological_process	2	341	33	19037	0.020900126	0.038995546	3.383453301	Psmb10; Psmb9
GO:1900029	positive regulation of ruffle assembly	biological_process	1	341	13	19037	0.021903718	0.03999508	4.294383036	Carmil2
GO:0030225	macrophage differentiation	biological_process	1	341	13	19037	0.021903718	0.03999508	4.294383036	Csf1
GO:0031386	protein tag	molecular_function	1	341	13	19037	0.021903718	0.03999508	4.294383036	Isg15
GO:0051024	positive regulation of immunoglobulin secretion	biological_process	1	341	13	19037	0.021903718	0.03999508	4.294383036	RT1-S3
GO:0004089	carbonate dehydratase activity	molecular_function	1	341	13	19037	0.021903718	0.03999508	4.294383036	Car14
GO:0021953	central nervous system neuron differentiation	biological_process	1	341	13	19037	0.021903718	0.03999508	4.294383036	Bcl11b
GO:0008253	5'-nucleotidase activity	molecular_function	1	341	13	19037	0.021903718	0.03999508	4.294383036	Nt5c3a
GO:0035770	ribonucleoprotein granule	cellular_component	1	341	13	19037	0.021903718	0.03999508	4.294383036	Tdrd7
GO:0070306	lens fiber cell differentiation	biological_process	1	341	13	19037	0.021903718	0.03999508	4.294383036	Tdrd7
GO:0090331	negative regulation of platelet aggregation	biological_process	1	341	13	19037	0.021903718	0.03999508	4.294383036	Abat
GO:0070266	necroptotic process	biological_process	1	341	13	19037	0.021903718	0.03999508	4.294383036	Mlkl
GO:0043268	positive regulation of potassium ion transport	biological_process	1	341	13	19037	0.021903718	0.03999508	4.294383036	Actn2
GO:0046622	positive regulation of organ growth	biological_process	1	341	13	19037	0.021903718	0.03999508	4.294383036	Rag2
GO:0051457	maintenance of protein location in nucleus	biological_process	1	341	13	19037	0.021903718	0.03999508	4.294383036	Pml
GO:0051974	negative regulation of telomerase activity	biological_process	1	341	13	19037	0.021903718	0.03999508	4.294383036	Pml
GO:0050880	regulation of blood vessel size	biological_process	1	341	13	19037	0.021903718	0.03999508	4.294383036	Cbs
GO:0006996	organelle organization	biological_process	1	341	13	19037	0.021903718	0.03999508	4.294383036	Atp2b2
GO:0007252	I-kappaB phosphorylation	biological_process	1	341	13	19037	0.021903718	0.03999508	4.294383036	Tlr3
GO:0042405	nuclear inclusion body	cellular_component	1	341	13	19037	0.021903718	0.03999508	4.294383036	Mnda
GO:0046902	regulation of mitochondrial membrane permeability	biological_process	1	341	13	19037	0.021903718	0.03999508	4.294383036	Cnp
GO:0031054	pre-miRNA processing	biological_process	1	341	13	19037	0.021903718	0.03999508	4.294383036	Adar
GO:0008015	blood circulation	biological_process	1	341	13	19037	0.021903718	0.03999508	4.294383036	Stat1
GO:2000272	negative regulation of signaling receptor activity	biological_process	1	341	13	19037	0.021903718	0.03999508	4.294383036	Ly6e
GO:0046689	response to mercury ion	biological_process	1	341	13	19037	0.021903718	0.03999508	4.294383036	Pgam2
GO:0019432	triglyceride biosynthetic process	biological_process	1	341	13	19037	0.021903718	0.03999508	4.294383036	Pnpla3
GO:0043279	response to alkaloid	biological_process	1	341	13	19037	0.021903718	0.03999508	4.294383036	Psmb9
GO:1902358	sulfate transmembrane transport	biological_process	1	341	13	19037	0.021903718	0.03999508	4.294383036	Slc26a3
GO:0050853	B cell receptor signaling pathway	biological_process	2	341	34	19037	0.022625668	0.041215502	3.283939969	Cd79b; Mnda
GO:0090102	cochlea development	biological_process	2	341	34	19037	0.022625668	0.041215502	3.283939969	Kcnk2; Atp2b2
GO:0070059	intrinsic apoptotic signaling pathway in response to endoplasmic reticulum stress	biological_process	2	341	34	19037	0.022625668	0.041215502	3.283939969	Casp12; Pml
GO:0006915	apoptotic process	biological_process	11	341	346	19037	0.022671575	0.041266558	1.774846168	Rtkn; Trim69; Rnf152; Sp110; Casp12; Irf1; Casp7; Pml; XAF1; LOC690000; Serpinb9
GO:0019005	SCF ubiquitin ligase complex	cellular_component	3	341	61	19037	0.02373461	0.043099512	2.745589154	Trim21; Abtb2; Fbxo39
GO:0000281	mitotic cytokinesis	biological_process	3	341	61	19037	0.02373461	0.043099512	2.745589154	Rtkn; Daxx; Mitd1
GO:0032922	circadian regulation of gene expression	biological_process	3	341	61	19037	0.02373461	0.043099512	2.745589154	Nampt; Pml; Ngfr
GO:0038023	signaling receptor activity	molecular_function	5	341	124	19037	0.024280594	0.044056299	2.251087882	Igsf1; Rtn4r; Klrk1; Tnfrsf13b; Ogfr
GO:0050873	brown fat cell differentiation	biological_process	2	341	35	19037	0.024426446	0.044216656	3.190113113	Ebf2; Mb
GO:0051281	positive regulation of release of sequestered calcium ion into cytosol	biological_process	2	341	35	19037	0.024426446	0.044216656	3.190113113	Trdn; Cxcl10
GO:0071375	cellular response to peptide hormone stimulus	biological_process	2	341	35	19037	0.024426446	0.044216656	3.190113113	Col2a1; Irf1
GO:0008217	regulation of blood pressure	biological_process	3	341	62	19037	0.025024633	0.044564656	2.701305458	Gch1; Myh6; Col1a2
GO:0005634	nucleus	cellular_component	100	341	4735	19037	0.0252495	0.044564656	1.179028078	Cmtr1; Usp18; Fam64a; Gch1; Tcf7; Smpx; Csdc2; Ifitm3; Batf2; Pnpt1; Rbfox1; Trim21; Plscr2; Ebf2; Trim55; Trim69; Herc6; Isg15; Isg20; Socs1; Oas2; Oas3; Oasl; Upp1; Rnf114; Spats2l; Parp9; Abtb2; LOC500956; Egr3; Eif2ak2; Skap1; Nampt; Kcnk2; Cldn19; Dnaja1; Sap30; Oas1a; Oas1b; Oas1i; Sp100; Ptpn22; Ifi35; Pax5; Sp110; Bcl11b; Samhd1; Sp140; Casp12; Ddx3y; Cmah; Zbp1; Irf1; Irf7; Irf9; Srpk3; …
GO:0050884	neuromuscular process controlling posture	biological_process	1	341	14	19037	0.02525588	0.044564656	3.987641391	Gch1
GO:1900181	negative regulation of protein localization to nucleus	biological_process	1	341	14	19037	0.02525588	0.044564656	3.987641391	Trim29
GO:0055008	cardiac muscle tissue morphogenesis	biological_process	1	341	14	19037	0.02525588	0.044564656	3.987641391	Myom2
GO:2000279	negative regulation of DNA biosynthetic process	biological_process	1	341	14	19037	0.02525588	0.044564656	3.987641391	Kcnk2
GO:0030239	myofibril assembly	biological_process	1	341	14	19037	0.02525588	0.044564656	3.987641391	Myh6
GO:0050811	GABA receptor binding	molecular_function	1	341	14	19037	0.02525588	0.044564656	3.987641391	Jakmip1
GO:0002089	lens morphogenesis in camera-type eye	biological_process	1	341	14	19037	0.02525588	0.044564656	3.987641391	Tdrd7
GO:0016064	immunoglobulin mediated immune response	biological_process	1	341	14	19037	0.02525588	0.044564656	3.987641391	Irf7
GO:0010529	negative regulation of transposition	biological_process	1	341	14	19037	0.02525588	0.044564656	3.987641391	Piwil4
GO:0050709	negative regulation of protein secretion	biological_process	1	341	14	19037	0.02525588	0.044564656	3.987641391	Rsad2
GO:0043267	negative regulation of potassium ion transport	biological_process	1	341	14	19037	0.02525588	0.044564656	3.987641391	Actn2
GO:0055013	cardiac muscle cell development	biological_process	1	341	14	19037	0.02525588	0.044564656	3.987641391	Actn2
GO:1900025	negative regulation of substrate adhesion-dependent cell spreading	biological_process	1	341	14	19037	0.02525588	0.044564656	3.987641391	Gbp1
GO:0002523	leukocyte migration involved in inflammatory response	biological_process	1	341	14	19037	0.02525588	0.044564656	3.987641391	Ccr6
GO:0032469	endoplasmic reticulum calcium ion homeostasis	biological_process	1	341	14	19037	0.02525588	0.044564656	3.987641391	Pml
GO:0045899	positive regulation of RNA polymerase II transcriptional preinitiation complex assembly	biological_process	1	341	14	19037	0.02525588	0.044564656	3.987641391	Gtf2f2
GO:0021702	cerebellar Purkinje cell differentiation	biological_process	1	341	14	19037	0.02525588	0.044564656	3.987641391	Atp2b2
GO:0035254	glutamate receptor binding	molecular_function	1	341	14	19037	0.02525588	0.044564656	3.987641391	Atp2b2
GO:0071044	histone mRNA catabolic process	biological_process	1	341	14	19037	0.02525588	0.044564656	3.987641391	Dcp2
GO:0005344	oxygen carrier activity	molecular_function	1	341	14	19037	0.02525588	0.044564656	3.987641391	Mb
GO:0015671	oxygen transport	biological_process	1	341	14	19037	0.02525588	0.044564656	3.987641391	Mb
GO:0042805	actinin binding	molecular_function	1	341	14	19037	0.02525588	0.044564656	3.987641391	Csrp3
GO:0000983	transcription factor activity, RNA polymerase II core promoter sequence-specific DNA binding	molecular_function	1	341	14	19037	0.02525588	0.044564656	3.987641391	Stat1
GO:0002021	response to dietary excess	biological_process	1	341	14	19037	0.02525588	0.044564656	3.987641391	Pnpla3
GO:0043616	keratinocyte proliferation	biological_process	1	341	14	19037	0.02525588	0.044564656	3.987641391	Krt2
GO:0015106	bicarbonate transmembrane transporter activity	molecular_function	1	341	14	19037	0.02525588	0.044564656	3.987641391	Slc26a3
GO:0060081	membrane hyperpolarization	biological_process	1	341	14	19037	0.02525588	0.044564656	3.987641391	Slc26a3
GO:0035865	cellular response to potassium ion	biological_process	1	341	14	19037	0.02525588	0.044564656	3.987641391	Serpine1
GO:0071559	response to transforming growth factor beta	biological_process	1	341	14	19037	0.02525588	0.044564656	3.987641391	Serpine1
GO:0007019	microtubule depolymerization	biological_process	1	341	14	19037	0.02525588	0.044564656	3.987641391	Stmn2
GO:0031115	negative regulation of microtubule polymerization	biological_process	1	341	14	19037	0.02525588	0.044564656	3.987641391	Stmn2
GO:0001503	ossification	biological_process	4	341	93	19037	0.025884394	0.045638794	2.401160407	Acan; Csf1; Col2a1; Rsad2
GO:0042169	SH2 domain binding	molecular_function	2	341	36	19037	0.026302389	0.046234512	3.10149886	Skap1; Sit1
GO:0048701	embryonic cranial skeleton morphogenesis	biological_process	2	341	36	19037	0.026302389	0.046234512	3.10149886	Pax5; Six2
GO:0000792	heterochromatin	cellular_component	2	341	36	19037	0.026302389	0.046234512	3.10149886	Daxx; Pml
GO:0061025	membrane fusion	biological_process	2	341	36	19037	0.026302389	0.046234512	3.10149886	Mx1; Mx2
GO:0010942	positive regulation of cell death	biological_process	3	341	63	19037	0.026356174	0.046258592	2.658427594	Ramp3; Kcnk2; Irf1
GO:0001932	regulation of protein phosphorylation	biological_process	3	341	63	19037	0.026356174	0.046258592	2.658427594	Socs1; Pml; Stat2
GO:0008009	chemokine activity	molecular_function	2	341	37	19037	0.028253349	0.049438006	3.017674566	Ccl12; Cxcl10
GO:0034260	negative regulation of GTPase activity	biological_process	2	341	37	19037	0.028253349	0.049438006	3.017674566	Rtkn; Klrk1
GO:0070534	protein K63-linked ubiquitination	biological_process	2	341	37	19037	0.028253349	0.049438006	3.017674566	Trim5; Rnf152
GO:0010107	potassium ion import	biological_process	2	341	37	19037	0.028253349	0.049438006	3.017674566	Kcnj3; Kcnj11
GO:0045651	positive regulation of macrophage differentiation	biological_process	1	341	15	19037	0.028801568	0.049681628	3.721798631	Csf1
GO:0005159	insulin-like growth factor receptor binding	molecular_function	1	341	15	19037	0.028801568	0.049681628	3.721798631	Socs1
GO:1904262	negative regulation of TORC1 signaling	biological_process	1	341	15	19037	0.028801568	0.049681628	3.721798631	Rnf152
GO:0003823	antigen binding	molecular_function	1	341	15	19037	0.028801568	0.049681628	3.721798631	Tspan4
GO:0033391	chromatoid body	cellular_component	1	341	15	19037	0.028801568	0.049681628	3.721798631	Tdrd7
GO:0034587	piRNA metabolic process	biological_process	1	341	15	19037	0.028801568	0.049681628	3.721798631	Piwil4
GO:0010181	FMN binding	molecular_function	1	341	15	19037	0.028801568	0.049681628	3.721798631	Cyp2e1
GO:0031065	positive regulation of histone deacetylation	biological_process	1	341	15	19037	0.028801568	0.049681628	3.721798631	Pml
GO:0010941	regulation of cell death	biological_process	1	341	15	19037	0.028801568	0.049681628	3.721798631	Ngfr
GO:0031643	positive regulation of myelination	biological_process	1	341	15	19037	0.028801568	0.049681628	3.721798631	Ngfr
GO:0040037	negative regulation of fibroblast growth factor receptor signaling pathway	biological_process	1	341	15	19037	0.028801568	0.049681628	3.721798631	Ngfr
GO:0045579	positive regulation of B cell differentiation	biological_process	1	341	15	19037	0.028801568	0.049681628	3.721798631	Cd27
GO:0005523	tropomyosin binding	molecular_function	1	341	15	19037	0.028801568	0.049681628	3.721798631	Tnnt2
GO:0031083	BLOC-1 complex	cellular_component	1	341	15	19037	0.028801568	0.049681628	3.721798631	RGD1309995
GO:0035265	organ growth	biological_process	1	341	15	19037	0.028801568	0.049681628	3.721798631	Ly6e
GO:0017128	phospholipid scramblase activity	molecular_function	1	341	15	19037	0.028801568	0.049681628	3.721798631	Ano2
GO:0034389	lipid particle organization	biological_process	1	341	15	19037	0.028801568	0.049681628	3.721798631	Pnpla3
GO:0031424	keratinization	biological_process	1	341	15	19037	0.028801568	0.049681628	3.721798631	Krt2
GO:0014912	negative regulation of smooth muscle cell migration	biological_process	1	341	15	19037	0.028801568	0.049681628	3.721798631	Serpine1
GO:0031902	late endosome membrane	cellular_component	3	341	65	19037	0.029144692	0.050235959	2.576629822	Ifitm3; Clcn4; Mitd1
GO:0071773	cellular response to BMP stimulus	biological_process	2	341	38	19037	0.030279103	0.052074642	2.938262077	Hfe2; Col2a1
GO:0045776	negative regulation of blood pressure	biological_process	2	341	38	19037	0.030279103	0.052074642	2.938262077	Gch1; Abat
GO:0035249	synaptic transmission, glutamatergic	biological_process	2	341	38	19037	0.030279103	0.052074642	2.938262077	Grik4; Clstn3
GO:0060326	cell chemotaxis	biological_process	3	341	66	19037	0.030602048	0.052590861	2.537589976	Defb4; Defb5; Ccr6
GO:0065003	protein-containing complex assembly	biological_process	3	341	67	19037	0.032101681	0.054767133	2.499715499	Gch1; Tspan4; Pml
GO:0032924	activin receptor signaling pathway	biological_process	1	341	16	19037	0.032532816	0.054767133	3.489186217	Hfe2
GO:0044319	wound healing, spreading of cells	biological_process	1	341	16	19037	0.032532816	0.054767133	3.489186217	Carmil2
GO:0010447	response to acidic pH	biological_process	1	341	16	19037	0.032532816	0.054767133	3.489186217	Acan
GO:0071850	mitotic cell cycle arrest	biological_process	1	341	16	19037	0.032532816	0.054767133	3.489186217	Pnpt1
GO:0035810	positive regulation of urine volume	biological_process	1	341	16	19037	0.032532816	0.054767133	3.489186217	Btc
GO:0045190	isotype switching	biological_process	1	341	16	19037	0.032532816	0.054767133	3.489186217	Cd40lg
GO:0031258	lamellipodium membrane	cellular_component	1	341	16	19037	0.032532816	0.054767133	3.489186217	Kcna2
GO:0022841	potassium ion leak channel activity	molecular_function	1	341	16	19037	0.032532816	0.054767133	3.489186217	Kcnk2
GO:0030322	stabilization of membrane potential	biological_process	1	341	16	19037	0.032532816	0.054767133	3.489186217	Kcnk2
GO:0060044	negative regulation of cardiac muscle cell proliferation	biological_process	1	341	16	19037	0.032532816	0.054767133	3.489186217	Kcnk2
GO:0030048	actin filament-based movement	biological_process	1	341	16	19037	0.032532816	0.054767133	3.489186217	Myh6
GO:0071374	cellular response to parathyroid hormone stimulus	biological_process	1	341	16	19037	0.032532816	0.054767133	3.489186217	Col2a1
GO:1990314	cellular response to insulin-like growth factor stimulus	biological_process	1	341	16	19037	0.032532816	0.054767133	3.489186217	Col2a1
GO:0071397	cellular response to cholesterol	biological_process	1	341	16	19037	0.032532816	0.054767133	3.489186217	Mlc1
GO:0071287	cellular response to manganese ion	biological_process	1	341	16	19037	0.032532816	0.054767133	3.489186217	Casp12
GO:0010832	negative regulation of myotube differentiation	biological_process	1	341	16	19037	0.032532816	0.054767133	3.489186217	Daxx
GO:0006801	superoxide metabolic process	biological_process	1	341	16	19037	0.032532816	0.054767133	3.489186217	Cbs
GO:0071425	hematopoietic stem cell proliferation	biological_process	1	341	16	19037	0.032532816	0.054767133	3.489186217	Wnt2b
GO:0060046	regulation of acrosome reaction	biological_process	1	341	16	19037	0.032532816	0.054767133	3.489186217	Zp2
GO:0035196	production of miRNAs involved in gene silencing by miRNA	biological_process	1	341	16	19037	0.032532816	0.054767133	3.489186217	Adar
GO:0000920	cell separation after cytokinesis	biological_process	1	341	16	19037	0.032532816	0.054767133	3.489186217	Mitd1
GO:0060158	phospholipase C-activating dopamine receptor signaling pathway	biological_process	1	341	16	19037	0.032532816	0.054767133	3.489186217	Gna14
GO:0006518	peptide metabolic process	biological_process	1	341	16	19037	0.032532816	0.054767133	3.489186217	Cpxm1
GO:0006259	DNA metabolic process	biological_process	1	341	16	19037	0.032532816	0.054767133	3.489186217	Trex1
GO:0051560	mitochondrial calcium ion homeostasis	biological_process	1	341	16	19037	0.032532816	0.054767133	3.489186217	LOC690000
GO:0071391	cellular response to estrogen stimulus	biological_process	1	341	16	19037	0.032532816	0.054767133	3.489186217	Serpinb9
GO:0071318	cellular response to ATP	biological_process	1	341	16	19037	0.032532816	0.054767133	3.489186217	Serpine1
GO:0001047	core promoter binding	molecular_function	3	341	68	19037	0.03364372	0.056513613	2.462954977	Tcf7; Irf9; Stat1
GO:0036464	cytoplasmic ribonucleoprotein granule	cellular_component	3	341	68	19037	0.03364372	0.056513613	2.462954977	Socs1; Ddx3y; Dcp2
GO:0007519	skeletal muscle tissue development	biological_process	3	341	68	19037	0.03364372	0.056513613	2.462954977	Myl3; Srpk3; Col19a1
GO:0009967	positive regulation of signal transduction	biological_process	2	341	40	19037	0.034553752	0.057915803	2.791348974	Skap1; Hsh2d
GO:0006811	ion transport	biological_process	2	341	40	19037	0.034553752	0.057915803	2.791348974	Lgals9; Grik4
GO:0043021	ribonucleoprotein complex binding	molecular_function	2	341	40	19037	0.034553752	0.057915803	2.791348974	Rplp2; Ifih1
GO:0007169	transmembrane receptor protein tyrosine kinase signaling pathway	biological_process	4	341	101	19037	0.035211213	0.058932183	2.210969484	Zap70; Srms; Csf1; RGD1561143
GO:0001501	skeletal system development	biological_process	4	341	101	19037	0.035211213	0.058932183	2.210969484	Acan; Vcan; Col2a1; Col1a2
GO:0005783	endoplasmic reticulum	cellular_component	24	341	949	19037	0.035310233	0.059055086	1.411851957	Usp25; Ifitm3; Pdia5; Rtn4r; Fndc5; Trdn; Oas2; Kcnk2; Dnaja1; Oas1a; Nt5c3a; Mlc1; Casp12; Hhatl; Rsad2; Cyp2e1; Kcnj11; Atp2b2; Zp2; Tor3a; Col1a2; LOC690000; Tap1; Ifit2
GO:0016567	protein ubiquitination	biological_process	12	341	412	19037	0.035351722	0.059081661	1.626028528	Trim30c; Trim21; Trim69; Herc6; Isg15; Socs1; Klhl30; Klhl33; Rag2; Ube2l6; Uba7; Rnf213
GO:0001779	natural killer cell differentiation	biological_process	1	341	17	19037	0.036441881	0.059608689	3.283939969	Slamf6
GO:0002063	chondrocyte development	biological_process	1	341	17	19037	0.036441881	0.059608689	3.283939969	Acan
GO:0030247	polysaccharide binding	molecular_function	1	341	17	19037	0.036441881	0.059608689	3.283939969	Clec18a
GO:0016126	sterol biosynthetic process	biological_process	1	341	17	19037	0.036441881	0.059608689	3.283939969	Faxdc2
GO:0001921	positive regulation of receptor recycling	biological_process	1	341	17	19037	0.036441881	0.059608689	3.283939969	Ramp3
GO:0030819	positive regulation of cAMP biosynthetic process	biological_process	1	341	17	19037	0.036441881	0.059608689	3.283939969	Ramp3
GO:0010759	positive regulation of macrophage chemotaxis	biological_process	1	341	17	19037	0.036441881	0.059608689	3.283939969	Csf1
GO:0032270	positive regulation of cellular protein metabolic process	biological_process	1	341	17	19037	0.036441881	0.059608689	3.283939969	Csf1
GO:2000353	positive regulation of endothelial cell apoptotic process	biological_process	1	341	17	19037	0.036441881	0.059608689	3.283939969	Cd40lg
GO:0002042	cell migration involved in sprouting angiogenesis	biological_process	1	341	17	19037	0.036441881	0.059608689	3.283939969	Egr3
GO:0000146	microfilament motor activity	molecular_function	1	341	17	19037	0.036441881	0.059608689	3.283939969	Myh6
GO:0007512	adult heart development	biological_process	1	341	17	19037	0.036441881	0.059608689	3.283939969	Myh6
GO:0014898	cardiac muscle hypertrophy in response to stress	biological_process	1	341	17	19037	0.036441881	0.059608689	3.283939969	Myh6
GO:0006978	DNA damage response, signal transduction by p53 class mediator resulting in transcription of p21 class mediator	biological_process	1	341	17	19037	0.036441881	0.059608689	3.283939969	Sp100
GO:1901222	regulation of NIK/NF-kappaB signaling	biological_process	1	341	17	19037	0.036441881	0.059608689	3.283939969	Ptpn22
GO:1990782	protein tyrosine kinase binding	molecular_function	1	341	17	19037	0.036441881	0.059608689	3.283939969	Ptpn22
GO:0031214	biomineral tissue development	biological_process	1	341	17	19037	0.036441881	0.059608689	3.283939969	Otop1
GO:0005639	integral component of nuclear inner membrane	cellular_component	1	341	17	19037	0.036441881	0.059608689	3.283939969	Majin
GO:0004550	nucleoside diphosphate kinase activity	molecular_function	1	341	17	19037	0.036441881	0.059608689	3.283939969	Cmpk2
GO:0006165	nucleoside diphosphate phosphorylation	biological_process	1	341	17	19037	0.036441881	0.059608689	3.283939969	Cmpk2
GO:0034620	cellular response to unfolded protein	biological_process	1	341	17	19037	0.036441881	0.059608689	3.283939969	Daxx
GO:0008631	intrinsic apoptotic signaling pathway in response to oxidative stress	biological_process	1	341	17	19037	0.036441881	0.059608689	3.283939969	Pml
GO:2000059	negative regulation of ubiquitin-dependent protein catabolic process	biological_process	1	341	17	19037	0.036441881	0.059608689	3.283939969	Pml
GO:0008626	granzyme-mediated apoptotic signaling pathway	biological_process	1	341	17	19037	0.036441881	0.059608689	3.283939969	Gzmbl3
GO:0040011	locomotion	biological_process	1	341	17	19037	0.036441881	0.059608689	3.283939969	Atp2b2
GO:0055117	regulation of cardiac muscle contraction	biological_process	1	341	17	19037	0.036441881	0.059608689	3.283939969	Tnni3k
GO:0060216	definitive hemopoiesis	biological_process	1	341	17	19037	0.036441881	0.059608689	3.283939969	Adar
GO:2000679	positive regulation of transcription regulatory region DNA binding	biological_process	1	341	17	19037	0.036441881	0.059608689	3.283939969	Lgals9
GO:0004970	ionotropic glutamate receptor activity	molecular_function	1	341	17	19037	0.036441881	0.059608689	3.283939969	Grik4
GO:0008408	3'-5' exonuclease activity	molecular_function	1	341	17	19037	0.036441881	0.059608689	3.283939969	Trex1
GO:0048306	calcium-dependent protein binding	molecular_function	3	341	70	19037	0.036855412	0.060199781	2.392584835	Tnnc1; Tnni3; Stmn2
GO:0006606	protein import into nucleus	biological_process	3	341	70	19037	0.036855412	0.060199781	2.392584835	Pml; Adar; Six2
GO:0044325	ion channel binding	molecular_function	5	341	137	19037	0.036983006	0.060365472	2.037481003	Trdn; Kcng4; Actn2; Kcnj11; Hrc
GO:0007417	central nervous system development	biological_process	4	341	103	19037	0.037827953	0.061701001	2.168038038	Acan; Vcan; Col2a1; Ngfr
GO:0044344	cellular response to fibroblast growth factor stimulus	biological_process	2	341	42	19037	0.039123215	0.063633812	2.658427594	Egr3; Serpine1
GO:0046658	anchored component of plasma membrane	cellular_component	2	341	42	19037	0.039123215	0.063633812	2.658427594	Nrn1; Art2b
GO:0009966	regulation of signal transduction	biological_process	2	341	42	19037	0.039123215	0.063633812	2.658427594	RGD1559731; Cd5
GO:1901216	positive regulation of neuron death	biological_process	2	341	42	19037	0.039123215	0.063633812	2.658427594	Daxx; Ngfr
GO:0071805	potassium ion transmembrane transport	biological_process	5	341	139	19037	0.039252673	0.063799416	2.008164729	Kcna2; Kcng2; Kcng4; Kcnk2; Kcnj11
GO:0003824	catalytic activity	molecular_function	3	341	72	19037	0.04023769	0.064811511	2.326124145	Spo11; Rsad2; Pnpla3
GO:0021549	cerebellum development	biological_process	3	341	72	19037	0.04023769	0.064811511	2.326124145	Abat; Cd3e; Atp2b2
GO:0042176	regulation of protein catabolic process	biological_process	1	341	18	19037	0.040521235	0.064811511	3.10149886	RGD1563091
GO:0019229	regulation of vasoconstriction	biological_process	1	341	18	19037	0.040521235	0.064811511	3.10149886	Hrh1
GO:0030169	low-density lipoprotein particle binding	molecular_function	1	341	18	19037	0.040521235	0.064811511	3.10149886	Vcan
GO:0005521	lamin binding	molecular_function	1	341	18	19037	0.040521235	0.064811511	3.10149886	Ifi27
GO:0002690	positive regulation of leukocyte chemotaxis	biological_process	1	341	18	19037	0.040521235	0.064811511	3.10149886	Cxcl10
GO:0050868	negative regulation of T cell activation	biological_process	1	341	18	19037	0.040521235	0.064811511	3.10149886	Ptpn22
GO:0035640	exploration behavior	biological_process	1	341	18	19037	0.040521235	0.064811511	3.10149886	Abat
GO:0015297	antiporter activity	molecular_function	1	341	18	19037	0.040521235	0.064811511	3.10149886	Clcn4
GO:0004190	aspartic-type endopeptidase activity	molecular_function	1	341	18	19037	0.040521235	0.064811511	3.10149886	Casp7
GO:0031396	regulation of protein ubiquitination	biological_process	1	341	18	19037	0.040521235	0.064811511	3.10149886	Daxx
GO:0048384	retinoic acid receptor signaling pathway	biological_process	1	341	18	19037	0.040521235	0.064811511	3.10149886	Pml
GO:0050910	detection of mechanical stimulus involved in sensory perception of sound	biological_process	1	341	18	19037	0.040521235	0.064811511	3.10149886	Atp2b2
GO:0060088	auditory receptor cell stereocilium organization	biological_process	1	341	18	19037	0.040521235	0.064811511	3.10149886	Atp2b2
GO:0043032	positive regulation of macrophage activation	biological_process	1	341	18	19037	0.040521235	0.064811511	3.10149886	Lgals9
GO:0070208	protein heterotrimerization	biological_process	1	341	18	19037	0.040521235	0.064811511	3.10149886	Col1a2
GO:0005234	extracellularly glutamate-gated ion channel activity	molecular_function	1	341	18	19037	0.040521235	0.064811511	3.10149886	Grik4
GO:0004180	carboxypeptidase activity	molecular_function	1	341	18	19037	0.040521235	0.064811511	3.10149886	Cpxm1
GO:0019433	triglyceride catabolic process	biological_process	1	341	18	19037	0.040521235	0.064811511	3.10149886	Pnpla3
GO:0071257	cellular response to electrical stimulus	biological_process	1	341	18	19037	0.040521235	0.064811511	3.10149886	Psmb9
GO:0090280	positive regulation of calcium ion import	biological_process	1	341	18	19037	0.040521235	0.064811511	3.10149886	Serpine1
GO:1904385	cellular response to angiotensin	biological_process	1	341	18	19037	0.040521235	0.064811511	3.10149886	Serpine1
GO:0050804	modulation of chemical synaptic transmission	biological_process	2	341	43	19037	0.041517259	0.066312688	2.596603696	Hrh1; Grik4
GO:0001974	blood vessel remodeling	biological_process	2	341	43	19037	0.041517259	0.066312688	2.596603696	Cbs; Csrp3
GO:0006898	receptor-mediated endocytosis	biological_process	4	341	106	19037	0.041970968	0.066979652	2.106678471	Ifitm3; Cd5; Cd6; Lgals3bp
GO:0045095	keratin filament	cellular_component	3	341	73	19037	0.041992876	0.066979652	2.29425943	Krt13; Krt2; Krt5
GO:0004871	signal transducer activity	molecular_function	7	341	218	19037	0.043162395	0.06879752	1.792609433	Sectm1b; Mlkl; Cd3e; Tnni3k; Stat1; Stat2; Gna14
GO:0000932	P-body	cellular_component	3	341	74	19037	0.043790756	0.069702804	2.263255925	Trim5; Mov10; Dcp2
GO:0042472	inner ear morphogenesis	biological_process	3	341	74	19037	0.043790756	0.069702804	2.263255925	Col2a1; Otop1; Atp2b2
GO:0071902	positive regulation of protein serine/threonine kinase activity	biological_process	2	341	44	19037	0.043983406	0.069913018	2.537589976	Irgm; Lgals9
GO:0050808	synapse organization	biological_process	2	341	44	19037	0.043983406	0.069913018	2.537589976	Atp2b2; Lrrc4
GO:0008266	poly(U) RNA binding	molecular_function	1	341	19	19037	0.044763563	0.070138698	2.938262077	Pnpt1
GO:0003756	protein disulfide isomerase activity	molecular_function	1	341	19	19037	0.044763563	0.070138698	2.938262077	Pdia5
GO:0014902	myotube differentiation	biological_process	1	341	19	19037	0.044763563	0.070138698	2.938262077	Trdn
GO:0031103	axon regeneration	biological_process	1	341	19	19037	0.044763563	0.070138698	2.938262077	Vcan
GO:0015078	proton transmembrane transporter activity	molecular_function	1	341	19	19037	0.044763563	0.070138698	2.938262077	Tcirg1
GO:0015986	ATP synthesis coupled proton transport	biological_process	1	341	19	19037	0.044763563	0.070138698	2.938262077	Tcirg1
GO:0046961	proton-transporting ATPase activity, rotational mechanism	molecular_function	1	341	19	19037	0.044763563	0.070138698	2.938262077	Tcirg1
GO:0030111	regulation of Wnt signaling pathway	biological_process	1	341	19	19037	0.044763563	0.070138698	2.938262077	Cmah
GO:0043046	DNA methylation involved in gamete generation	biological_process	1	341	19	19037	0.044763563	0.070138698	2.938262077	Piwil4
GO:0034698	response to gonadotropin	biological_process	1	341	19	19037	0.044763563	0.070138698	2.938262077	Tox2
GO:0051967	negative regulation of synaptic transmission, glutamatergic	biological_process	1	341	19	19037	0.044763563	0.070138698	2.938262077	Atad1
GO:0071280	cellular response to copper ion	biological_process	1	341	19	19037	0.044763563	0.070138698	2.938262077	Daxx
GO:0051593	response to folic acid	biological_process	1	341	19	19037	0.044763563	0.070138698	2.938262077	Cbs
GO:0003407	neural retina development	biological_process	1	341	19	19037	0.044763563	0.070138698	2.938262077	Atp2b2
GO:0001774	microglial cell activation	biological_process	1	341	19	19037	0.044763563	0.070138698	2.938262077	Tlr3
GO:0033365	protein localization to organelle	biological_process	1	341	19	19037	0.044763563	0.070138698	2.938262077	Csrp3
GO:0097067	cellular response to thyroid hormone stimulus	biological_process	1	341	19	19037	0.044763563	0.070138698	2.938262077	Col1a2
GO:0008066	glutamate receptor activity	molecular_function	1	341	19	19037	0.044763563	0.070138698	2.938262077	Grik4
GO:0008328	ionotropic glutamate receptor complex	cellular_component	1	341	19	19037	0.044763563	0.070138698	2.938262077	Grik4
GO:0002376	immune system process	biological_process	1	341	19	19037	0.044763563	0.070138698	2.938262077	Psmb9
GO:0051493	regulation of cytoskeleton organization	biological_process	1	341	19	19037	0.044763563	0.070138698	2.938262077	Stmn2
GO:0071347	cellular response to interleukin-1	biological_process	4	341	108	19037	0.044879285	0.070272313	2.067665906	Ccl12; Irf1; Psmb9; Serpine1
GO:0007163	establishment or maintenance of cell polarity	biological_process	2	341	45	19037	0.046521011	0.072596683	2.481199088	Carmil2; Cd3g
GO:0030890	positive regulation of B cell proliferation	biological_process	2	341	45	19037	0.046521011	0.072596683	2.481199088	Cd40lg; Tnfrsf13c
GO:0045429	positive regulation of nitric oxide biosynthetic process	biological_process	2	341	45	19037	0.046521011	0.072596683	2.481199088	Klrk1; Hrh1
GO:0051402	neuron apoptotic process	biological_process	2	341	45	19037	0.046521011	0.072596683	2.481199088	Casp7; Ngfr
GO:0051480	regulation of cytosolic calcium ion concentration	biological_process	2	341	45	19037	0.046521011	0.072596683	2.481199088	Atp2b2; Hrc
GO:0003690	double-stranded DNA binding	molecular_function	5	341	145	19037	0.046584774	0.072647066	1.925068258	Mb21d1; Ddx58; Mnda; Stat1; Trex1
GO:0071320	cellular response to cAMP	biological_process	3	341	76	19037	0.047514465	0.07404685	2.203696558	Rplp2; Slc26a3; Serpine1
GO:0010469	regulation of signaling receptor activity	biological_process	11	341	389	19037	0.048493637	0.075521804	1.578654947	Ccl12; Sectm1b; Btc; Csf1; Fndc5; Cd40lg; Nampt; Cxcl10; LOC103694381; Tnfsf10; Serpine1
GO:0031648	protein destabilization	biological_process	2	341	46	19037	0.049129382	0.075542828	2.427259977	Trim21; Irgm
GO:0005778	peroxisomal membrane	cellular_component	2	341	46	19037	0.049129382	0.075542828	2.427259977	Fndc5; Dao
GO:0031397	negative regulation of protein ubiquitination	biological_process	2	341	46	19037	0.049129382	0.075542828	2.427259977	Isg15; Dnaja1
GO:0048536	spleen development	biological_process	2	341	46	19037	0.049129382	0.075542828	2.427259977	RGD1563091; Psmb9
GO:0010332	response to gamma radiation	biological_process	2	341	46	19037	0.049129382	0.075542828	2.427259977	Cxcl10; Pml
GO:0043034	costamere	cellular_component	1	341	20	19037	0.049161754	0.075542828	2.791348974	Smpx
GO:0098641	cadherin binding involved in cell-cell adhesion	molecular_function	1	341	20	19037	0.049161754	0.075542828	2.791348974	Trim29
GO:0001709	cell fate determination	biological_process	1	341	20	19037	0.049161754	0.075542828	2.791348974	Ebf2
GO:1901652	response to peptide	biological_process	1	341	20	19037	0.049161754	0.075542828	2.791348974	Cd40lg
GO:0001894	tissue homeostasis	biological_process	1	341	20	19037	0.049161754	0.075542828	2.791348974	Col2a1
GO:1903077	negative regulation of protein localization to plasma membrane	biological_process	1	341	20	19037	0.049161754	0.075542828	2.791348974	Gbp1
GO:0001741	XY body	cellular_component	1	341	20	19037	0.049161754	0.075542828	2.791348974	Daxx
GO:0032968	positive regulation of transcription elongation from RNA polymerase II promoter	biological_process	1	341	20	19037	0.049161754	0.075542828	2.791348974	Gtf2f2
GO:0002224	toll-like receptor signaling pathway	biological_process	1	341	20	19037	0.049161754	0.075542828	2.791348974	Tlr3
GO:0004198	calcium-dependent cysteine-type endopeptidase activity	molecular_function	1	341	20	19037	0.049161754	0.075542828	2.791348974	Capn8
GO:0004177	aminopeptidase activity	molecular_function	1	341	20	19037	0.049161754	0.075542828	2.791348974	Lap3
GO:0046827	positive regulation of protein export from nucleus	biological_process	1	341	20	19037	0.049161754	0.075542828	2.791348974	Camk4
GO:0005229	intracellular calcium activated chloride channel activity	molecular_function	1	341	20	19037	0.049161754	0.075542828	2.791348974	Ano2
GO:0015301	anion:anion antiporter activity	molecular_function	1	341	20	19037	0.049161754	0.075542828	2.791348974	Slc26a3
GO:0000302	response to reactive oxygen species	biological_process	1	341	20	19037	0.049161754	0.075542828	2.791348974	Serpine1
GO:0051259	protein complex oligomerization	biological_process	3	341	77	19037	0.049440172	0.075920104	2.175077122	Kcna2; Oas1a; Mlc1
GO:0031410	cytoplasmic vesicle	cellular_component	9	341	306	19037	0.049747039	0.076340536	1.641969984	Gch1; Ifitm3; Socs1; Mlc1; Gbp1; Gbp2; Gbp4; Gbp5; Stoml1
GO:0071260	cellular response to mechanical stimulus	biological_process	4	341	112	19037	0.051049258	0.078286836	1.993820695	Col2a1; Irf1; Tlr3; Serpine1
GO:0031122	cytoplasmic microtubule organization	biological_process	2	341	47	19037	0.051807781	0.079186993	2.375616148	Trdn; Atad1
GO:0034198	cellular response to amino acid starvation	biological_process	2	341	47	19037	0.051807781	0.079186993	2.375616148	Rnf152; Eif2ak2
GO:0030968	endoplasmic reticulum unfolded protein response	biological_process	2	341	47	19037	0.051807781	0.079186993	2.375616148	Eif2ak2; Casp12
GO:0032720	negative regulation of tumor necrosis factor production	biological_process	2	341	47	19037	0.051807781	0.079186993	2.375616148	Ptpn22; Lgals9
GO:0046677	response to antibiotic	biological_process	2	341	47	19037	0.051807781	0.079186993	2.375616148	Havcr1; Ccr4
GO:0048020	CCR chemokine receptor binding	molecular_function	1	341	21	19037	0.053708899	0.080966779	2.658427594	Ccl12
GO:0010259	multicellular organism aging	biological_process	1	341	21	19037	0.053708899	0.080966779	2.658427594	Acan
GO:0017049	GTP-Rho binding	molecular_function	1	341	21	19037	0.053708899	0.080966779	2.658427594	Rtkn
GO:0034704	calcium channel complex	cellular_component	1	341	21	19037	0.053708899	0.080966779	2.658427594	Trdn
GO:0009190	cyclic nucleotide biosynthetic process	biological_process	1	341	21	19037	0.053708899	0.080966779	2.658427594	Mb21d1
GO:0003774	motor activity	molecular_function	1	341	21	19037	0.053708899	0.080966779	2.658427594	Myl3
GO:0097193	intrinsic apoptotic signaling pathway	biological_process	1	341	21	19037	0.053708899	0.080966779	2.658427594	Casp12
GO:0001618	virus receptor activity	molecular_function	1	341	21	19037	0.053708899	0.080966779	2.658427594	Havcr1
GO:0000421	autophagosome membrane	cellular_component	1	341	21	19037	0.053708899	0.080966779	2.658427594	Irgm
GO:1903076	regulation of protein localization to plasma membrane	biological_process	1	341	21	19037	0.053708899	0.080966779	2.658427594	Gbp1
GO:0003746	translation elongation factor activity	molecular_function	1	341	21	19037	0.053708899	0.080966779	2.658427594	Eef1a2
GO:0021675	nerve development	biological_process	1	341	21	19037	0.053708899	0.080966779	2.658427594	Ngfr
GO:0048535	lymph node development	biological_process	1	341	21	19037	0.053708899	0.080966779	2.658427594	LOC103694381
GO:0030506	ankyrin binding	molecular_function	1	341	21	19037	0.053708899	0.080966779	2.658427594	Kcnj11
GO:0050870	positive regulation of T cell activation	biological_process	1	341	21	19037	0.053708899	0.080966779	2.658427594	Cd3e
GO:0031333	negative regulation of protein complex assembly	biological_process	1	341	21	19037	0.053708899	0.080966779	2.658427594	XAF1
GO:0004683	calmodulin-dependent protein kinase activity	molecular_function	1	341	21	19037	0.053708899	0.080966779	2.658427594	Camk4
GO:0051932	synaptic transmission, GABAergic	biological_process	1	341	21	19037	0.053708899	0.080966779	2.658427594	Clstn3
GO:0001676	long-chain fatty acid metabolic process	biological_process	1	341	21	19037	0.053708899	0.080966779	2.658427594	Pnpla3
GO:0045109	intermediate filament organization	biological_process	1	341	21	19037	0.053708899	0.080966779	2.658427594	Krt2
GO:0071404	cellular response to low-density lipoprotein particle stimulus	biological_process	1	341	21	19037	0.053708899	0.080966779	2.658427594	Serpine1
GO:0016887	ATPase activity	molecular_function	6	341	190	19037	0.055487149	0.083592911	1.762957246	Myh6; Atad1; Tnnt2; Tor3a; Rnf213; Tap1
GO:0038083	peptidyl-tyrosine autophosphorylation	biological_process	2	341	49	19037	0.057371507	0.086206665	2.278652223	Zap70; Srms
GO:0070936	protein K48-linked ubiquitination	biological_process	2	341	49	19037	0.057371507	0.086206665	2.278652223	Rnf152; Dtx3l
GO:0000166	nucleotide binding	molecular_function	2	341	49	19037	0.057371507	0.086206665	2.278652223	Nt5c3a; Tap1
GO:0009411	response to UV	biological_process	2	341	49	19037	0.057371507	0.086206665	2.278652223	Casp7; Pml
GO:0002687	positive regulation of leukocyte migration	biological_process	1	341	22	19037	0.058398286	0.086565989	2.537589976	Ccl12
GO:0007130	synaptonemal complex assembly	biological_process	1	341	22	19037	0.058398286	0.086565989	2.537589976	Spo11
GO:0010592	positive regulation of lamellipodium assembly	biological_process	1	341	22	19037	0.058398286	0.086565989	2.537589976	Carmil2
GO:0048265	response to pain	biological_process	1	341	22	19037	0.058398286	0.086565989	2.537589976	Gch1
GO:0046579	positive regulation of Ras protein signal transduction	biological_process	1	341	22	19037	0.058398286	0.086565989	2.537589976	Csf1
GO:0032874	positive regulation of stress-activated MAPK cascade	biological_process	1	341	22	19037	0.058398286	0.086565989	2.537589976	Eif2ak2
GO:0033197	response to vitamin E	biological_process	1	341	22	19037	0.058398286	0.086565989	2.537589976	Eif2ak2
GO:0043296	apical junction complex	cellular_component	1	341	22	19037	0.058398286	0.086565989	2.537589976	Cldn19
GO:0050750	low-density lipoprotein particle receptor binding	molecular_function	1	341	22	19037	0.058398286	0.086565989	2.537589976	Dnaja1
GO:0010596	negative regulation of endothelial cell migration	biological_process	1	341	22	19037	0.058398286	0.086565989	2.537589976	Sp100
GO:0050730	regulation of peptidyl-tyrosine phosphorylation	biological_process	1	341	22	19037	0.058398286	0.086565989	2.537589976	Ptpn22
GO:0005537	mannose binding	molecular_function	1	341	22	19037	0.058398286	0.086565989	2.537589976	Cd209e
GO:0048041	focal adhesion assembly	biological_process	1	341	22	19037	0.058398286	0.086565989	2.537589976	Actn2
GO:0043153	entrainment of circadian clock by photoperiod	biological_process	1	341	22	19037	0.058398286	0.086565989	2.537589976	Pml
GO:0090398	cellular senescence	biological_process	1	341	22	19037	0.058398286	0.086565989	2.537589976	Pml
GO:0006464	cellular protein modification process	biological_process	1	341	22	19037	0.058398286	0.086565989	2.537589976	Uba7
GO:0030673	axolemma	cellular_component	1	341	22	19037	0.058398286	0.086565989	2.537589976	Kcnj11
GO:0009948	anterior/posterior axis specification	biological_process	1	341	22	19037	0.058398286	0.086565989	2.537589976	Six2
GO:1904315	transmitter-gated ion channel activity involved in regulation of postsynaptic membrane potential	molecular_function	1	341	22	19037	0.058398286	0.086565989	2.537589976	Grik4
GO:0048240	sperm capacitation	biological_process	1	341	22	19037	0.058398286	0.086565989	2.537589976	Slc26a3
GO:0048260	positive regulation of receptor-mediated endocytosis	biological_process	1	341	22	19037	0.058398286	0.086565989	2.537589976	Serpine1
GO:0008092	cytoskeletal protein binding	molecular_function	3	341	82	19037	0.059703002	0.088443215	2.042450468	Fabp3; Actn2; Krt2
GO:0042981	regulation of apoptotic process	biological_process	7	341	235	19037	0.061667673	0.091236532	1.662931303	Rtkn; Eif2ak2; Sbk2; Tnfrsf14; Casp12; Ngfr; Cd27
GO:0010629	negative regulation of gene expression	biological_process	7	341	235	19037	0.061667673	0.091236532	1.662931303	Parp9; Ptpn22; Cd3e; Lgals9; Parp10; Parp14; Serpine1
GO:0042393	histone binding	molecular_function	4	341	119	19037	0.06298397	0.092412662	1.876537125	Parp9; Daxx; Stat1; Dtx3l
GO:0045111	intermediate filament cytoskeleton	cellular_component	2	341	51	19037	0.063205484	0.092412662	2.189293313	Carmil2; Krt13
GO:0048247	lymphocyte chemotaxis	biological_process	1	341	23	19037	0.063223394	0.092412662	2.427259977	Ccl12
GO:0007141	male meiosis I	biological_process	1	341	23	19037	0.063223394	0.092412662	2.427259977	Spo11
GO:0014059	regulation of dopamine secretion	biological_process	1	341	23	19037	0.063223394	0.092412662	2.427259977	Kcna2
GO:0034399	nuclear periphery	cellular_component	1	341	23	19037	0.063223394	0.092412662	2.427259977	Sp100
GO:0030234	enzyme regulator activity	molecular_function	1	341	23	19037	0.063223394	0.092412662	2.427259977	Sln
GO:0031674	I band	cellular_component	1	341	23	19037	0.063223394	0.092412662	2.427259977	Myl3
GO:0003382	epithelial cell morphogenesis	biological_process	1	341	23	19037	0.063223394	0.092412662	2.427259977	Bcl11b
GO:0000245	spliceosomal complex assembly	biological_process	1	341	23	19037	0.063223394	0.092412662	2.427259977	Srpk3
GO:0030670	phagocytic vesicle membrane	cellular_component	1	341	23	19037	0.063223394	0.092412662	2.427259977	Irgm
GO:0019373	epoxygenase P450 pathway	biological_process	1	341	23	19037	0.063223394	0.092412662	2.427259977	Cyp2e1
GO:0033198	response to ATP	biological_process	1	341	23	19037	0.063223394	0.092412662	2.427259977	Kcnj11
GO:0090190	positive regulation of branching involved in ureteric bud morphogenesis	biological_process	1	341	23	19037	0.063223394	0.092412662	2.427259977	Wnt2b
GO:0044853	plasma membrane raft	cellular_component	1	341	23	19037	0.063223394	0.092412662	2.427259977	Cd8a
GO:0016234	inclusion body	cellular_component	1	341	23	19037	0.063223394	0.092412662	2.427259977	Zp2
GO:0046329	negative regulation of JNK cascade	biological_process	1	341	23	19037	0.063223394	0.092412662	2.427259977	Aida
GO:0031683	G-protein beta/gamma-subunit complex binding	molecular_function	1	341	23	19037	0.063223394	0.092412662	2.427259977	Gna14
GO:0070530	K63-linked polyubiquitin modification-dependent protein binding	molecular_function	1	341	23	19037	0.063223394	0.092412662	2.427259977	Parp10
GO:1903078	positive regulation of protein localization to plasma membrane	biological_process	2	341	52	19037	0.066221567	0.096672598	2.147191518	Ramp3; Kcnj11
GO:0030170	pyridoxal phosphate binding	molecular_function	2	341	52	19037	0.066221567	0.096672598	2.147191518	Abat; Cbs
GO:0032088	negative regulation of NF-kappaB transcription factor activity	biological_process	3	341	85	19037	0.066362445	0.096817018	1.970363981	Trim21; Parp10; Nlrc5
GO:0031369	translation initiation factor binding	molecular_function	1	341	24	19037	0.068177888	0.098593086	2.326124145	Gch1
GO:0070584	mitochondrion morphogenesis	biological_process	1	341	24	19037	0.068177888	0.098593086	2.326124145	Pnpt1
GO:0030517	negative regulation of axon extension	biological_process	1	341	24	19037	0.068177888	0.098593086	2.326124145	Rtn4r
GO:0031146	SCF-dependent proteasomal ubiquitin-dependent protein catabolic process	biological_process	1	341	24	19037	0.068177888	0.098593086	2.326124145	Fbxo39
GO:0001671	ATPase activator activity	molecular_function	1	341	24	19037	0.068177888	0.098593086	2.326124145	Dnaja1
GO:0010906	regulation of glucose metabolic process	biological_process	1	341	24	19037	0.068177888	0.098593086	2.326124145	Fgl1
GO:0004521	endoribonuclease activity	molecular_function	1	341	24	19037	0.068177888	0.098593086	2.326124145	Piwil4
GO:0031047	gene silencing by RNA	biological_process	1	341	24	19037	0.068177888	0.098593086	2.326124145	Piwil4
GO:0001891	phagocytic cup	cellular_component	1	341	24	19037	0.068177888	0.098593086	2.326124145	Irgm
GO:0043325	phosphatidylinositol-3,4-bisphosphate binding	molecular_function	1	341	24	19037	0.068177888	0.098593086	2.326124145	Rag2
GO:2000179	positive regulation of neural precursor cell proliferation	biological_process	1	341	24	19037	0.068177888	0.098593086	2.326124145	Ngfr
GO:0042474	middle ear morphogenesis	biological_process	1	341	24	19037	0.068177888	0.098593086	2.326124145	Six2
GO:0004623	phospholipase A2 activity	molecular_function	1	341	24	19037	0.068177888	0.098593086	2.326124145	Pnpla3
GO:0015701	bicarbonate transport	biological_process	1	341	24	19037	0.068177888	0.098593086	2.326124145	Slc26a3
GO:0006821	chloride transport	biological_process	2	341	53	19037	0.069302448	0.100156575	2.106678471	Clcn4; Ano2
GO:0016485	protein processing	biological_process	3	341	87	19037	0.071007677	0.102556771	1.925068258	Casp7; Gzmbl3; Cpxm1
GO:0048167	regulation of synaptic plasticity	biological_process	2	341	54	19037	0.072447144	0.10443973	2.067665906	Hrh1; Atp2b2
GO:0032755	positive regulation of interleukin-6 production	biological_process	2	341	54	19037	0.072447144	0.10443973	2.067665906	Ddx58; Tlr3
GO:0046332	SMAD binding	molecular_function	2	341	54	19037	0.072447144	0.10443973	2.067665906	Pml; Col1a2
GO:0070536	protein K63-linked deubiquitination	biological_process	1	341	25	19037	0.073255615	0.104949696	2.233079179	Usp25
GO:0045672	positive regulation of osteoclast differentiation	biological_process	1	341	25	19037	0.073255615	0.104949696	2.233079179	Csf1
GO:0001191	transcriptional repressor activity, RNA polymerase II transcription factor binding	molecular_function	1	341	25	19037	0.073255615	0.104949696	2.233079179	Parp9
GO:0030162	regulation of proteolysis	biological_process	1	341	25	19037	0.073255615	0.104949696	2.233079179	Abtb2
GO:0007422	peripheral nervous system development	biological_process	1	341	25	19037	0.073255615	0.104949696	2.233079179	Egr3
GO:0008392	arachidonic acid epoxygenase activity	molecular_function	1	341	25	19037	0.073255615	0.104949696	2.233079179	Cyp2e1
GO:0042098	T cell proliferation	biological_process	1	341	25	19037	0.073255615	0.104949696	2.233079179	Psmb10
GO:0045070	positive regulation of viral genome replication	biological_process	1	341	25	19037	0.073255615	0.104949696	2.233079179	Adar
GO:0004181	metallocarboxypeptidase activity	molecular_function	1	341	25	19037	0.073255615	0.104949696	2.233079179	Cpxm1
GO:0034394	protein localization to cell surface	biological_process	1	341	25	19037	0.073255615	0.104949696	2.233079179	Fcnb
GO:0016324	apical plasma membrane	cellular_component	9	341	330	19037	0.074339687	0.106436723	1.522553986	Osmr; Bst2; Kcnk2; Tcirg1; Mlc1; Havcr1; Atp2b2; Cd300lg; Slc26a3
GO:0006511	ubiquitin-dependent protein catabolic process	biological_process	6	341	204	19037	0.074932766	0.107219358	1.641969984	Usp18; Usp25; Trim25; Uba7; Rnf213; Dtx3l
GO:0010923	negative regulation of phosphatase activity	biological_process	2	341	55	19037	0.075654643	0.10805131	2.030071981	Marf1; Csrnp3
GO:0051602	response to electrical stimulus	biological_process	2	341	55	19037	0.075654643	0.10805131	2.030071981	Kcnj3; Eef1a2
GO:0009409	response to cold	biological_process	2	341	55	19037	0.075654643	0.10805131	2.030071981	Cxcl10; Casp12
GO:0006914	autophagy	biological_process	3	341	89	19037	0.075814989	0.108213355	1.881808297	Trim30c; Trim5; LOC690000
GO:0051117	ATPase binding	molecular_function	3	341	90	19037	0.078278703	0.110404872	1.860899316	Usp25; Tcirg1; Hrc
GO:0007131	reciprocal meiotic recombination	biological_process	1	341	26	19037	0.078450602	0.110404872	2.147191518	Spo11
GO:0030742	GTP-dependent protein binding	molecular_function	1	341	26	19037	0.078450602	0.110404872	2.147191518	Gch1
GO:0035198	miRNA binding	molecular_function	1	341	26	19037	0.078450602	0.110404872	2.147191518	Pnpt1
GO:0032733	positive regulation of interleukin-10 production	biological_process	1	341	26	19037	0.078450602	0.110404872	2.147191518	Cd40lg
GO:0042100	B cell proliferation	biological_process	1	341	26	19037	0.078450602	0.110404872	2.147191518	Cd40lg
GO:0019731	antibacterial humoral response	biological_process	1	341	26	19037	0.078450602	0.110404872	2.147191518	RT1-S3
GO:0035924	cellular response to vascular endothelial growth factor stimulus	biological_process	1	341	26	19037	0.078450602	0.110404872	2.147191518	Egr3
GO:1990138	neuron projection extension	biological_process	1	341	26	19037	0.078450602	0.110404872	2.147191518	Nrn1
GO:0010996	response to auditory stimulus	biological_process	1	341	26	19037	0.078450602	0.110404872	2.147191518	Cxcl10
GO:0042562	hormone binding	molecular_function	1	341	26	19037	0.078450602	0.110404872	2.147191518	Rxfp1
GO:1903506	regulation of nucleic acid-templated transcription	biological_process	1	341	26	19037	0.078450602	0.110404872	2.147191518	Actn2
GO:0080025	phosphatidylinositol-3,5-bisphosphate binding	molecular_function	1	341	26	19037	0.078450602	0.110404872	2.147191518	Rag2
GO:0030099	myeloid cell differentiation	biological_process	1	341	26	19037	0.078450602	0.110404872	2.147191518	Pml
GO:2000377	regulation of reactive oxygen species metabolic process	biological_process	1	341	26	19037	0.078450602	0.110404872	2.147191518	Ngfr
GO:0004386	helicase activity	molecular_function	1	341	26	19037	0.078450602	0.110404872	2.147191518	Gtf2f2
GO:0045879	negative regulation of smoothened signaling pathway	biological_process	1	341	26	19037	0.078450602	0.110404872	2.147191518	Cd3e
GO:0008361	regulation of cell size	biological_process	1	341	26	19037	0.078450602	0.110404872	2.147191518	Atp2b2
GO:0045663	positive regulation of myoblast differentiation	biological_process	1	341	26	19037	0.078450602	0.110404872	2.147191518	Csrp3
GO:0048738	cardiac muscle tissue development	biological_process	1	341	26	19037	0.078450602	0.110404872	2.147191518	Csrp3
GO:0051481	negative regulation of cytosolic calcium ion concentration	biological_process	1	341	26	19037	0.078450602	0.110404872	2.147191518	Hrc
GO:0035235	ionotropic glutamate receptor signaling pathway	biological_process	1	341	26	19037	0.078450602	0.110404872	2.147191518	Grik4
GO:0071372	cellular response to follicle-stimulating hormone stimulus	biological_process	1	341	26	19037	0.078450602	0.110404872	2.147191518	Serpine1
GO:0005516	calmodulin binding	molecular_function	5	341	166	19037	0.078571789	0.110508038	1.681535526	Myh6; Ngfr; Atp2b2; Camk4; Iqcf3
GO:0003007	heart morphogenesis	biological_process	2	341	56	19037	0.078923911	0.110800722	1.993820695	Col2a1; Mybpc3
GO:0043280	positive regulation of cysteine-type endopeptidase activity involved in apoptotic process	biological_process	2	341	56	19037	0.078923911	0.110800722	1.993820695	Casp12; Tnfsf10
GO:0005254	chloride channel activity	molecular_function	2	341	56	19037	0.078923911	0.110800722	1.993820695	Clcn4; Slc26a3
GO:0002020	protease binding	molecular_function	4	341	128	19037	0.080440857	0.112861701	1.744593109	Casp12; Col1a2; Serpinb9; Serpine1
GO:0051289	protein homotetramerization	biological_process	3	341	91	19037	0.08078204	0.113271536	1.840449873	Samhd1; Actn2; Gbp5
GO:0042531	positive regulation of tyrosine phosphorylation of STAT protein	biological_process	2	341	57	19037	0.08225389	0.115265317	1.958841385	Parp9; Parp14
GO:1990830	cellular response to leukemia inhibitory factor	biological_process	4	341	129	19037	0.082524996	0.115575055	1.731069131	Trim25; Pml; Stoml1; Serpine1
GO:0005504	fatty acid binding	molecular_function	1	341	27	19037	0.083757048	0.116593043	2.067665906	Fabp3
GO:0042311	vasodilation	biological_process	1	341	27	19037	0.083757048	0.116593043	2.067665906	Gch1
GO:0001954	positive regulation of cell-matrix adhesion	biological_process	1	341	27	19037	0.083757048	0.116593043	2.067665906	Csf1
GO:0005891	voltage-gated calcium channel complex	cellular_component	1	341	27	19037	0.083757048	0.116593043	2.067665906	Trdn
GO:0004407	histone deacetylase activity	molecular_function	1	341	27	19037	0.083757048	0.116593043	2.067665906	Sap30
GO:0010039	response to iron ion	biological_process	1	341	27	19037	0.083757048	0.116593043	2.067665906	Abat
GO:1902895	positive regulation of pri-miRNA transcription by RNA polymerase II	biological_process	1	341	27	19037	0.083757048	0.116593043	2.067665906	Ngfr
GO:0007586	digestion	biological_process	1	341	27	19037	0.083757048	0.116593043	2.067665906	Capn8
GO:0035257	nuclear hormone receptor binding	molecular_function	1	341	27	19037	0.083757048	0.116593043	2.067665906	Stat1
GO:0016925	protein sumoylation	biological_process	1	341	27	19037	0.083757048	0.116593043	2.067665906	Ifih1
GO:0042391	regulation of membrane potential	biological_process	4	341	130	19037	0.084637606	0.117747797	1.717753215	Kcnk2; Actn2; Kcnj11; Slc26a3
GO:0004175	endopeptidase activity	molecular_function	3	341	93	19037	0.085906258	0.11944075	1.800870306	Casp12; Psmb10; Psmb9
GO:0060070	canonical Wnt signaling pathway	biological_process	3	341	94	19037	0.088526441	0.122794026	1.781712111	Tcf7; Myh6; Wnt2b
GO:0006302	double-strand break repair	biological_process	2	341	59	19037	0.089091649	0.122794026	1.892439982	Parp9; Dtx3l
GO:0071108	protein K48-linked deubiquitination	biological_process	1	341	28	19037	0.089169319	0.122794026	1.993820695	Usp25
GO:0051019	mitogen-activated protein kinase binding	molecular_function	1	341	28	19037	0.089169319	0.122794026	1.993820695	Gch1
GO:0043488	regulation of mRNA stability	biological_process	1	341	28	19037	0.089169319	0.122794026	1.993820695	Csdc2
GO:0014850	response to muscle activity	biological_process	1	341	28	19037	0.089169319	0.122794026	1.993820695	Fndc5
GO:0071949	FAD binding	molecular_function	1	341	28	19037	0.089169319	0.122794026	1.993820695	Dao
GO:0070527	platelet aggregation	biological_process	1	341	28	19037	0.089169319	0.122794026	1.993820695	Ubash3a
GO:0035108	limb morphogenesis	biological_process	1	341	28	19037	0.089169319	0.122794026	1.993820695	Col2a1
GO:0048148	behavioral response to cocaine	biological_process	1	341	28	19037	0.089169319	0.122794026	1.993820695	Abat
GO:0010800	positive regulation of peptidyl-threonine phosphorylation	biological_process	1	341	28	19037	0.089169319	0.122794026	1.993820695	Irgm
GO:0097228	sperm principal piece	cellular_component	1	341	28	19037	0.089169319	0.122794026	1.993820695	Ccr6
GO:0030295	protein kinase activator activity	molecular_function	1	341	28	19037	0.089169319	0.122794026	1.993820695	Daxx
GO:0050718	positive regulation of interleukin-1 beta secretion	biological_process	1	341	28	19037	0.089169319	0.122794026	1.993820695	Lgals9
GO:0043542	endothelial cell migration	biological_process	1	341	28	19037	0.089169319	0.122794026	1.993820695	Stat1
GO:0006094	gluconeogenesis	biological_process	1	341	28	19037	0.089169319	0.122794026	1.993820695	Pgam2
GO:0001650	fibrillar center	cellular_component	4	341	133	19037	0.091144827	0.12543963	1.679006901	Pax5; Sp140; Rsad2; Camk4
GO:0050885	neuromuscular process controlling balance	biological_process	2	341	60	19037	0.092597217	0.127286704	1.860899316	Rbfox1; Atp2b2
GO:0008203	cholesterol metabolic process	biological_process	2	341	60	19037	0.092597217	0.127286704	1.860899316	Fgl1; Cyp27a1
GO:0002548	monocyte chemotaxis	biological_process	1	341	29	19037	0.094681949	0.129458494	1.925068258	Ccl12
GO:0043950	positive regulation of cAMP-mediated signaling	biological_process	1	341	29	19037	0.094681949	0.129458494	1.925068258	Cxcl10
GO:0006911	phagocytosis, engulfment	biological_process	1	341	29	19037	0.094681949	0.129458494	1.925068258	Havcr1
GO:0002092	positive regulation of receptor internalization	biological_process	1	341	29	19037	0.094681949	0.129458494	1.925068258	Atad1
GO:0055074	calcium ion homeostasis	biological_process	1	341	29	19037	0.094681949	0.129458494	1.925068258	Hrc
GO:0090200	positive regulation of release of cytochrome c from mitochondria	biological_process	1	341	29	19037	0.094681949	0.129458494	1.925068258	Tnfsf10
GO:0002040	sprouting angiogenesis	biological_process	1	341	29	19037	0.094681949	0.129458494	1.925068258	Rnf213
GO:0008047	enzyme activator activity	molecular_function	1	341	29	19037	0.094681949	0.129458494	1.925068258	Dtx3l
GO:0045861	negative regulation of proteolysis	biological_process	1	341	29	19037	0.094681949	0.129458494	1.925068258	Serpine1
GO:0005764	lysosome	cellular_component	7	341	259	19037	0.09517217	0.130051728	1.508837283	Ramp3; Rnf152; Mlc1; Irgm; Zc3hav1; Ctsw; Dtx3l
GO:0030315	T-tubule	cellular_component	2	341	61	19037	0.096159076	0.131167345	1.83039277	Kcnj3; Kcnj11
GO:0003712	transcription cofactor activity	molecular_function	2	341	61	19037	0.096159076	0.131167345	1.83039277	Sap30; Mnda
GO:0050729	positive regulation of inflammatory response	biological_process	2	341	61	19037	0.096159076	0.131167345	1.83039277	Tlr3; Serpine1
GO:0034605	cellular response to heat	biological_process	2	341	62	19037	0.099776081	0.135679057	1.800870306	Cxcl10; Daxx
GO:0004497	monooxygenase activity	molecular_function	2	341	62	19037	0.099776081	0.135679057	1.800870306	Cyp27a1; Cyp2e1
GO:0030374	ligand-dependent nuclear receptor transcription coactivator activity	molecular_function	2	341	62	19037	0.099776081	0.135679057	1.800870306	Actn2; Helz2
GO:1990090	cellular response to nerve growth factor stimulus	biological_process	2	341	62	19037	0.099776081	0.135679057	1.800870306	Serpine1; Stmn2
GO:0006836	neurotransmitter transport	biological_process	1	341	30	19037	0.100289632	0.135679057	1.860899316	Sv2c
GO:0005719	nuclear euchromatin	cellular_component	1	341	30	19037	0.100289632	0.135679057	1.860899316	Tcf7
GO:0032281	AMPA glutamate receptor complex	cellular_component	1	341	30	19037	0.100289632	0.135679057	1.860899316	Nrn1
GO:0015991	ATP hydrolysis coupled proton transport	biological_process	1	341	30	19037	0.100289632	0.135679057	1.860899316	Tcirg1
GO:0090023	positive regulation of neutrophil chemotaxis	biological_process	1	341	30	19037	0.100289632	0.135679057	1.860899316	Ccr7
GO:0031069	hair follicle morphogenesis	biological_process	1	341	30	19037	0.100289632	0.135679057	1.860899316	Ngfr
GO:0006611	protein export from nucleus	biological_process	1	341	30	19037	0.100289632	0.135679057	1.860899316	Adar
GO:0032689	negative regulation of interferon-gamma production	biological_process	1	341	30	19037	0.100289632	0.135679057	1.860899316	Lgals9
GO:0019882	antigen processing and presentation	biological_process	1	341	30	19037	0.100289632	0.135679057	1.860899316	Psmb9
GO:0046697	decidualization	biological_process	1	341	30	19037	0.100289632	0.135679057	1.860899316	Serpine1
GO:0007613	memory	biological_process	3	341	99	19037	0.102193012	0.138173095	1.691726651	Hrh1; Kcnk2; Atad1
GO:0005788	endoplasmic reticulum lumen	cellular_component	2	341	63	19037	0.103447077	0.139705005	1.772285063	Pdia5; Tor3a
GO:0045860	positive regulation of protein kinase activity	biological_process	2	341	63	19037	0.103447077	0.139705005	1.772285063	Csf1; Daxx
GO:0010951	negative regulation of endopeptidase activity	biological_process	4	341	139	19037	0.10490673	0.141593411	1.606531783	Itih4; Bst2; Serpinb9; Serpine1
GO:0004867	serine-type endopeptidase inhibitor activity	molecular_function	3	341	100	19037	0.105036634	0.141603126	1.674809384	Itih4; Serpinb9; Serpine1
GO:0035091	phosphatidylinositol binding	molecular_function	3	341	100	19037	0.105036634	0.141603126	1.674809384	Rag2; Aida; Mitd1
GO:0055072	iron ion homeostasis	biological_process	1	341	31	19037	0.105987219	0.141972433	1.800870306	Hfe2
GO:0004896	cytokine receptor activity	molecular_function	1	341	31	19037	0.105987219	0.141972433	1.800870306	Osmr
GO:0045840	positive regulation of mitotic nuclear division	biological_process	1	341	31	19037	0.105987219	0.141972433	1.800870306	Btc
GO:0010165	response to X-ray	biological_process	1	341	31	19037	0.105987219	0.141972433	1.800870306	Col2a1
GO:0050681	androgen receptor binding	molecular_function	1	341	31	19037	0.105987219	0.141972433	1.800870306	Daxx
GO:0006367	transcription initiation from RNA polymerase II promoter	biological_process	1	341	31	19037	0.105987219	0.141972433	1.800870306	Gtf2f2
GO:0051928	positive regulation of calcium ion transport	biological_process	1	341	31	19037	0.105987219	0.141972433	1.800870306	Atp2b2
GO:0035035	histone acetyltransferase binding	molecular_function	1	341	31	19037	0.105987219	0.141972433	1.800870306	Stat1
GO:0050806	positive regulation of synaptic transmission	biological_process	1	341	31	19037	0.105987219	0.141972433	1.800870306	Clstn3
GO:0004806	triglyceride lipase activity	molecular_function	1	341	31	19037	0.105987219	0.141972433	1.800870306	Pnpla3
GO:0007026	negative regulation of microtubule depolymerization	biological_process	1	341	31	19037	0.105987219	0.141972433	1.800870306	Stmn2
GO:0006816	calcium ion transport	biological_process	3	341	101	19037	0.107916033	0.144472276	1.658227113	Ccl12; Ramp3; Atp2b2
GO:0008565	protein transporter activity	molecular_function	2	341	65	19037	0.110946355	0.148271099	1.717753215	Ramp3; Mlc1
GO:0071230	cellular response to amino acid stimulus	biological_process	2	341	65	19037	0.110946355	0.148271099	1.717753215	Socs1; Col1a2
GO:0035094	response to nicotine	biological_process	2	341	65	19037	0.110946355	0.148271099	1.717753215	Casp12; Abat
GO:0046875	ephrin receptor binding	molecular_function	1	341	32	19037	0.111769713	0.148340712	1.744593109	Efnb3
GO:0000228	nuclear chromosome	cellular_component	1	341	32	19037	0.111769713	0.148340712	1.744593109	Spo11
GO:0016236	macroautophagy	biological_process	1	341	32	19037	0.111769713	0.148340712	1.744593109	Tcirg1
GO:0051539	4 iron, 4 sulfur cluster binding	molecular_function	1	341	32	19037	0.111769713	0.148340712	1.744593109	Rsad2
GO:0030507	spectrin binding	molecular_function	1	341	32	19037	0.111769713	0.148340712	1.744593109	Gbp1
GO:0071276	cellular response to cadmium ion	biological_process	1	341	32	19037	0.111769713	0.148340712	1.744593109	Daxx
GO:0042771	intrinsic apoptotic signaling pathway in response to DNA damage by p53 class mediator	biological_process	1	341	32	19037	0.111769713	0.148340712	1.744593109	Pml
GO:2000463	positive regulation of excitatory postsynaptic potential	biological_process	1	341	32	19037	0.111769713	0.148340712	1.744593109	Ngfr
GO:0097730	non-motile cilium	cellular_component	1	341	32	19037	0.111769713	0.148340712	1.744593109	Ano2
GO:0032967	positive regulation of collagen biosynthetic process	biological_process	1	341	32	19037	0.111769713	0.148340712	1.744593109	Serpine1
GO:0036120	cellular response to platelet-derived growth factor stimulus	biological_process	1	341	32	19037	0.111769713	0.148340712	1.744593109	Serpine1
GO:2000352	negative regulation of endothelial cell apoptotic process	biological_process	1	341	32	19037	0.111769713	0.148340712	1.744593109	Serpine1
GO:0006869	lipid transport	biological_process	2	341	66	19037	0.114772275	0.152063381	1.691726651	RGD1309808; Apol9a
GO:0006006	glucose metabolic process	biological_process	2	341	66	19037	0.114772275	0.152063381	1.691726651	Oas1a; Kcnj11
GO:0007188	adenylate cyclase-modulating G-protein coupled receptor signaling pathway	biological_process	2	341	66	19037	0.114772275	0.152063381	1.691726651	Rxfp1; Gna14
GO:0044297	cell body	cellular_component	3	341	104	19037	0.116764395	0.154614012	1.610393639	Cd40lg; Daxx; Cd3e
GO:0000118	histone deacetylase complex	cellular_component	1	341	33	19037	0.117632267	0.154698161	1.691726651	Sap30
GO:0046718	viral entry into host cell	biological_process	1	341	33	19037	0.117632267	0.154698161	1.691726651	Havcr1
GO:0008180	COP9 signalosome	cellular_component	1	341	33	19037	0.117632267	0.154698161	1.691726651	Themis
GO:0040014	regulation of multicellular organism growth	biological_process	1	341	33	19037	0.117632267	0.154698161	1.691726651	Daxx
GO:0072332	intrinsic apoptotic signaling pathway by p53 class mediator	biological_process	1	341	33	19037	0.117632267	0.154698161	1.691726651	Pml
GO:0051968	positive regulation of synaptic transmission, glutamatergic	biological_process	1	341	33	19037	0.117632267	0.154698161	1.691726651	Ngfr
GO:1904646	cellular response to amyloid-beta	biological_process	1	341	33	19037	0.117632267	0.154698161	1.691726651	Ngfr
GO:0031226	intrinsic component of plasma membrane	cellular_component	1	341	33	19037	0.117632267	0.154698161	1.691726651	Cd6
GO:0070371	ERK1 and ERK2 cascade	biological_process	1	341	33	19037	0.117632267	0.154698161	1.691726651	Lgals9
GO:0001937	negative regulation of endothelial cell proliferation	biological_process	1	341	33	19037	0.117632267	0.154698161	1.691726651	Stat1
GO:0030325	adrenal gland development	biological_process	1	341	33	19037	0.117632267	0.154698161	1.691726651	Ly6e
GO:0001533	cornified envelope	cellular_component	1	341	33	19037	0.117632267	0.154698161	1.691726651	Krt2
GO:0006813	potassium ion transport	biological_process	2	341	67	19037	0.118647459	0.155847377	1.666476999	Kcnk2; Kcnj11
GO:0010243	response to organonitrogen compound	biological_process	2	341	67	19037	0.118647459	0.155847377	1.666476999	Casp12; Cyp2e1
GO:0010468	regulation of gene expression	biological_process	7	341	273	19037	0.118708704	0.155847377	1.431461012	Marf1; Col2a1; Bcl11b; Ddx3y; Irf1; Ngfr; Tapbp
GO:0006355	regulation of transcription, DNA-templated	biological_process	20	341	890	19037	0.121219901	0.159053741	1.254538865	Igsf1; Tcf7; Csdc2; Sap30; Sp100; Pax5; Sp110; Bcl11b; Sp140; Irf1; Irf9; Phf11; Tox2; Daxx; Znfx1; Pml; Ascc3; Gtf2f2; Adar; Stat2
GO:0032091	negative regulation of protein binding	biological_process	2	341	68	19037	0.122570708	0.16073477	1.641969984	Mitd1; Ifit2
GO:0046872	metal ion binding	molecular_function	28	341	1291	19037	0.123095882	0.161038946	1.210809779	Atp13a5; Trim21; Ebf2; Trim69; Oas3; Ypel1; Rnf114; Rnf152; Egr3; Dnaja1; Col2a1; Sp140; Rxfp1; Abat; Phf11; Rsad2; Cbs; Tnni3; Mb; Tnni3k; Adar; Csrp3; Zc3hav1; Col1a2; Parp12; Mybpc3; Oasl2; Fcnb
GO:0008277	regulation of G-protein coupled receptor protein signaling pathway	biological_process	1	341	34	19037	0.123570179	0.161038946	1.641969984	Ramp3
GO:0030316	osteoclast differentiation	biological_process	1	341	34	19037	0.123570179	0.161038946	1.641969984	Csf1
GO:0007257	activation of JUN kinase activity	biological_process	1	341	34	19037	0.123570179	0.161038946	1.641969984	Cd40lg
GO:0007274	neuromuscular synaptic transmission	biological_process	1	341	34	19037	0.123570179	0.161038946	1.641969984	Egr3
GO:0043392	negative regulation of DNA binding	biological_process	1	341	34	19037	0.123570179	0.161038946	1.641969984	Sp100
GO:0007569	cell aging	biological_process	1	341	34	19037	0.123570179	0.161038946	1.641969984	Pml
GO:0045930	negative regulation of mitotic cell cycle	biological_process	1	341	34	19037	0.123570179	0.161038946	1.641969984	Pml
GO:0021537	telencephalon development	biological_process	1	341	34	19037	0.123570179	0.161038946	1.641969984	Rfx4
GO:0006096	glycolytic process	biological_process	1	341	34	19037	0.123570179	0.161038946	1.641969984	Pgam2
GO:0042246	tissue regeneration	biological_process	1	341	34	19037	0.123570179	0.161038946	1.641969984	Serpine1
GO:0042995	cell projection	cellular_component	3	341	107	19037	0.125918188	0.164006308	1.565242415	Cd40lg; Irgm; Cnp
GO:0031463	Cul3-RING ubiquitin ligase complex	cellular_component	2	341	69	19037	0.126540819	0.16453871	1.618173318	Klhl30; Klhl33
GO:0033574	response to testosterone	biological_process	2	341	69	19037	0.126540819	0.16453871	1.618173318	Havcr1; Kcnj11
GO:0007179	transforming growth factor beta receptor signaling pathway	biological_process	2	341	69	19037	0.126540819	0.16453871	1.618173318	Pml; Col1a2
GO:0055007	cardiac muscle cell differentiation	biological_process	1	341	35	19037	0.129578891	0.167357627	1.595056556	Ifitm3
GO:0005154	epidermal growth factor receptor binding	molecular_function	1	341	35	19037	0.129578891	0.167357627	1.595056556	Btc
GO:0000723	telomere maintenance	biological_process	1	341	35	19037	0.129578891	0.167357627	1.595056556	Sp100
GO:0030534	adult behavior	biological_process	1	341	35	19037	0.129578891	0.167357627	1.595056556	Pax5
GO:2001240	negative regulation of extrinsic apoptotic signaling pathway in absence of ligand	biological_process	1	341	35	19037	0.129578891	0.167357627	1.595056556	Col2a1
GO:0005216	ion channel activity	molecular_function	1	341	35	19037	0.129578891	0.167357627	1.595056556	Mlc1
GO:0016705	oxidoreductase activity, acting on paired donors, with incorporation or reduction of molecular oxygen	molecular_function	1	341	35	19037	0.129578891	0.167357627	1.595056556	Cyp27a1
GO:0008202	steroid metabolic process	biological_process	1	341	35	19037	0.129578891	0.167357627	1.595056556	Cyp2e1
GO:0050796	regulation of insulin secretion	biological_process	1	341	35	19037	0.129578891	0.167357627	1.595056556	Kcnj11
GO:0070491	repressing transcription factor binding	molecular_function	1	341	35	19037	0.129578891	0.167357627	1.595056556	Stat1
GO:0048147	negative regulation of fibroblast proliferation	biological_process	1	341	35	19037	0.129578891	0.167357627	1.595056556	Parp10
GO:0008146	sulfotransferase activity	molecular_function	1	341	35	19037	0.129578891	0.167357627	1.595056556	Sult1d1
GO:0016579	protein deubiquitination	biological_process	2	341	70	19037	0.130556584	0.168431859	1.595056556	Usp18; Usp25
GO:0022008	neurogenesis	biological_process	2	341	70	19037	0.130556584	0.168431859	1.595056556	Abtb2; Bcl11b
GO:0005615	extracellular space	cellular_component	28	341	1300	19037	0.130639492	0.168444664	1.20242725	Hfe2; Ccl12; Fabp3; Defb4; Defb5; Acan; Clec18a; Btc; Csf1; Cd40lg; Nrn1; Vcan; Cxcl10; Col2a1; Otop1; Col23a1; Havcr1; LOC103694381; Wnt2b; Ckm; Cnp; Lgals3bp; Lgals9; Col1a2; Cpxm1; Ctsw; Serpinb9; Serpine1
GO:0019898	extrinsic component of membrane	cellular_component	2	341	71	19037	0.134616792	0.173379216	1.572590971	Jakmip1; Mitd1
GO:0045335	phagocytic vesicle	cellular_component	2	341	71	19037	0.134616792	0.173379216	1.572590971	Havcr1; Irgm
GO:0031966	mitochondrial membrane	cellular_component	3	341	110	19037	0.135364254	0.173841967	1.522553986	Mx1; Mx2; LOC690000
GO:0006953	acute-phase response	biological_process	1	341	36	19037	0.135653979	0.173841967	1.55074943	Itih4
GO:0034612	response to tumor necrosis factor	biological_process	1	341	36	19037	0.135653979	0.173841967	1.55074943	Gch1
GO:0048873	homeostasis of number of cells within a tissue	biological_process	1	341	36	19037	0.135653979	0.173841967	1.55074943	Csf1
GO:0044295	axonal growth cone	cellular_component	1	341	36	19037	0.135653979	0.173841967	1.55074943	Rtn4r
GO:0007249	I-kappaB kinase/NF-kappaB signaling	biological_process	1	341	36	19037	0.135653979	0.173841967	1.55074943	Irf1
GO:0009055	electron transfer activity	molecular_function	1	341	36	19037	0.135653979	0.173841967	1.55074943	Aox2
GO:0005834	heterotrimeric G-protein complex	cellular_component	1	341	36	19037	0.135653979	0.173841967	1.55074943	Gna14
GO:0018149	peptide cross-linking	biological_process	1	341	36	19037	0.135653979	0.173841967	1.55074943	Krt2
GO:0048013	ephrin receptor signaling pathway	biological_process	1	341	37	19037	0.141791158	0.180139907	1.508837283	Efnb3
GO:0001784	phosphotyrosine residue binding	molecular_function	1	341	37	19037	0.141791158	0.180139907	1.508837283	Zap70
GO:0019838	growth factor binding	molecular_function	1	341	37	19037	0.141791158	0.180139907	1.508837283	Osmr
GO:0042788	polysomal ribosome	cellular_component	1	341	37	19037	0.141791158	0.180139907	1.508837283	Pnpt1
GO:0042476	odontogenesis	biological_process	1	341	37	19037	0.141791158	0.180139907	1.508837283	Csf1
GO:0030168	platelet activation	biological_process	1	341	37	19037	0.141791158	0.180139907	1.508837283	Cd40lg
GO:0046627	negative regulation of insulin receptor signaling pathway	biological_process	1	341	37	19037	0.141791158	0.180139907	1.508837283	Socs1
GO:0031624	ubiquitin conjugating enzyme binding	molecular_function	1	341	37	19037	0.141791158	0.180139907	1.508837283	Rnf114
GO:0019228	neuronal action potential	biological_process	1	341	37	19037	0.141791158	0.180139907	1.508837283	Kcna2
GO:0051924	regulation of calcium ion transport	biological_process	1	341	37	19037	0.141791158	0.180139907	1.508837283	Sln
GO:0010507	negative regulation of autophagy	biological_process	1	341	37	19037	0.141791158	0.180139907	1.508837283	Ptpn22
GO:0010634	positive regulation of epithelial cell migration	biological_process	1	341	37	19037	0.141791158	0.180139907	1.508837283	Ccr6
GO:0007339	binding of sperm to zona pellucida	biological_process	1	341	37	19037	0.141791158	0.180139907	1.508837283	Zp2
GO:0043531	ADP binding	molecular_function	1	341	37	19037	0.141791158	0.180139907	1.508837283	Tap1
GO:0060076	excitatory synapse	cellular_component	1	341	37	19037	0.141791158	0.180139907	1.508837283	Lrrc4
GO:0007015	actin filament organization	biological_process	3	341	112	19037	0.141817249	0.180139907	1.495365522	Myom2; Mybpc1; Mybpc3
GO:0007189	adenylate cyclase-activating G-protein coupled receptor signaling pathway	biological_process	2	341	73	19037	0.142865689	0.181172533	1.529506287	Ramp3; Rxfp1
GO:0000784	nuclear chromosome, telomeric region	cellular_component	2	341	73	19037	0.142865689	0.181172533	1.529506287	Majin; Pml
GO:0046330	positive regulation of JNK cascade	biological_process	2	341	73	19037	0.142865689	0.181172533	1.529506287	Cd27; Tlr3
GO:0030336	negative regulation of cell migration	biological_process	3	341	113	19037	0.14508887	0.183890781	1.482132198	Acan; Bst2; Serpine1
GO:0020037	heme binding	molecular_function	4	341	155	19037	0.146172922	0.185163065	1.440696244	Cyp27a1; Cyp2e1; Cbs; Mb
GO:0005546	phosphatidylinositol-4,5-bisphosphate binding	molecular_function	2	341	74	19037	0.147051954	0.185828246	1.508837283	Actn2; Rag2
GO:0005515	protein binding	molecular_function	35	341	1678	19037	0.147386557	0.185828246	1.16444832	Sv2c; RT1-A1; RT1-A2; Gch1; Csdc2; Bst2; Rtn4r; Trdn; Klrk1; Kcna2; Eif2ak2; Kcnj3; Kcnk2; Dnaja1; Myh6; Casp12; Irf1; Actn2; Atad1; Eef1a2; Daxx; Pml; Ngfr; Tnni3; Kcnj11; Cd5; Cd6; Tnnt2; Mb; Csrp3; Tapbp; Zc3hav1; XAF1; Tap1; Stmn2
GO:0005578	proteinaceous extracellular matrix	cellular_component	6	341	243	19037	0.147433975	0.185828246	1.378443938	Acan; Vcan; Col2a1; Wnt2b; Zp2; Lgals3bp
GO:0004519	endonuclease activity	molecular_function	1	341	38	19037	0.147986272	0.185828246	1.469131039	Rnase2
GO:0030501	positive regulation of bone mineralization	biological_process	1	341	38	19037	0.147986272	0.185828246	1.469131039	Isg15
GO:0019216	regulation of lipid metabolic process	biological_process	1	341	38	19037	0.147986272	0.185828246	1.469131039	Bcl11b
GO:0045664	regulation of neuron differentiation	biological_process	1	341	38	19037	0.147986272	0.185828246	1.469131039	Bcl11b
GO:0006641	triglyceride metabolic process	biological_process	1	341	38	19037	0.147986272	0.185828246	1.469131039	Cyp2e1
GO:0006605	protein targeting	biological_process	1	341	38	19037	0.147986272	0.185828246	1.469131039	Pml
GO:0032590	dendrite membrane	cellular_component	1	341	38	19037	0.147986272	0.185828246	1.469131039	Ngfr
GO:0032508	DNA duplex unwinding	biological_process	1	341	38	19037	0.147986272	0.185828246	1.469131039	Ascc3
GO:0005109	frizzled binding	molecular_function	1	341	38	19037	0.147986272	0.185828246	1.469131039	Wnt2b
GO:0051721	protein phosphatase 2A binding	molecular_function	1	341	38	19037	0.147986272	0.185828246	1.469131039	Stat1
GO:0006913	nucleocytoplasmic transport	biological_process	1	341	38	19037	0.147986272	0.185828246	1.469131039	Camk4
GO:0055088	lipid homeostasis	biological_process	1	341	38	19037	0.147986272	0.185828246	1.469131039	Pnpla3
GO:0051453	regulation of intracellular pH	biological_process	1	341	38	19037	0.147986272	0.185828246	1.469131039	Slc26a3
GO:0043066	negative regulation of apoptotic process	biological_process	13	341	573	19037	0.150253959	0.188573212	1.266580686	Btc; Cd40lg; Egr3; Eif2ak2; Dnaja1; Bcl11b; Daxx; Ngfr; Cbs; Cd27; Adar; Serpinb9; Ifit3
GO:0003677	DNA binding	molecular_function	21	341	968	19037	0.150445139	0.188710533	1.211122489	Spo11; Tcf7; Dhx58; Csdc2; Batf2; Ebf2; Oasl; Mb21d1; Pax5; Sp110; Sp140; Zbp1; Irf1; Irf7; Majin; Rag2; Gtf2f2; Adar; Stat1; Stat2; Ifih1
GO:0050727	regulation of inflammatory response	biological_process	2	341	75	19037	0.151277814	0.189548966	1.488719453	Usp18; Casp12
GO:0043154	negative regulation of cysteine-type endopeptidase activity involved in apoptotic process	biological_process	2	341	75	19037	0.151277814	0.189548966	1.488719453	Cd27; Serpinb9
GO:0070542	response to fatty acid	biological_process	1	341	39	19037	0.154235294	0.192627197	1.431461012	Fabp3
GO:0017048	Rho GTPase binding	molecular_function	1	341	39	19037	0.154235294	0.192627197	1.431461012	Rtkn
GO:0005637	nuclear inner membrane	cellular_component	1	341	39	19037	0.154235294	0.192627197	1.431461012	Ifi27
GO:0007281	germ cell development	biological_process	1	341	39	19037	0.154235294	0.192627197	1.431461012	Tdrd7
GO:0051879	Hsp90 protein binding	molecular_function	1	341	39	19037	0.154235294	0.192627197	1.431461012	Gbp1
GO:0055093	response to hyperoxia	biological_process	1	341	39	19037	0.154235294	0.192627197	1.431461012	Serpine1
GO:0001077	transcriptional activator activity, RNA polymerase II proximal promoter sequence-specific DNA binding	molecular_function	7	341	292	19037	0.155118243	0.193625151	1.338318001	Ebf2; Pax5; Bcl11b; Irf1; Tox2; Six2; Rfx4
GO:0007050	cell cycle arrest	biological_process	2	341	76	19037	0.155542061	0.194049231	1.469131039	Irf1; Pml
GO:0010628	positive regulation of gene expression	biological_process	10	341	433	19037	0.156342198	0.194942082	1.289306685	Ramp3; Csf1; Cd40lg; Ptpn22; Ddx58; Cd3e; Tlr3; Lgals9; Serpinb9; Serpine1
GO:0045121	membrane raft	cellular_component	7	341	293	19037	0.157169183	0.195867427	1.333750363	RT1-A2; Zap70; Bst2; Rtn4r; Mlc1; Ngfr; Atp2b2
GO:0071407	cellular response to organic cyclic compound	biological_process	3	341	117	19037	0.15846373	0.197374144	1.431461012	Socs1; Stat1; Serpine1
GO:1903955	positive regulation of protein targeting to mitochondrion	biological_process	2	341	77	19037	0.159843489	0.19845012	1.450051415	Rnase2; Mybpc1
GO:0051591	response to cAMP	biological_process	2	341	77	19037	0.159843489	0.19845012	1.450051415	Pnpt1; Stat1
GO:0002039	p53 binding	molecular_function	2	341	77	19037	0.159843489	0.19845012	1.450051415	Trim29; Daxx
GO:0005811	lipid droplet	cellular_component	2	341	77	19037	0.159843489	0.19845012	1.450051415	Rsad2; Pnpla3
GO:0045165	cell fate commitment	biological_process	2	341	77	19037	0.159843489	0.19845012	1.450051415	Pml; Wnt2b
GO:0042542	response to hydrogen peroxide	biological_process	2	341	77	19037	0.159843489	0.19845012	1.450051415	Mb; Stat1
GO:0040018	positive regulation of multicellular organism growth	biological_process	1	341	40	19037	0.160534323	0.198560138	1.395674487	Csf1
GO:0006612	protein targeting to membrane	biological_process	1	341	40	19037	0.160534323	0.198560138	1.395674487	Rtp4
GO:0051482	positive regulation of cytosolic calcium ion concentration involved in phospholipase C-activating G-protein coupled signaling pathway	biological_process	1	341	40	19037	0.160534323	0.198560138	1.395674487	Lpar4
GO:0005547	phosphatidylinositol-3,4,5-trisphosphate binding	molecular_function	1	341	40	19037	0.160534323	0.198560138	1.395674487	Rag2
GO:0030155	regulation of cell adhesion	biological_process	1	341	40	19037	0.160534323	0.198560138	1.395674487	Pml
GO:0046676	negative regulation of insulin secretion	biological_process	1	341	40	19037	0.160534323	0.198560138	1.395674487	Kcnj11
GO:0007616	long-term memory	biological_process	1	341	40	19037	0.160534323	0.198560138	1.395674487	Camk4
GO:0006397	mRNA processing	biological_process	3	341	118	19037	0.161876827	0.200113399	1.419329987	Csdc2; Rbfox1; Adar
GO:0031234	extrinsic component of cytoplasmic side of plasma membrane	cellular_component	2	341	78	19037	0.164180896	0.202853055	1.431461012	Zap70; Srms
GO:0005622	intracellular	cellular_component	19	341	880	19037	0.164419094	0.203038667	1.205355239	Trim30c; Defb4; Defb5; Bst2; Ramp3; Rtkn; Cd40lg; Rnf114; Bcl11b; Rxfp1; Eef1a2; Ccr6; Ccr7; Ngfr; Ascc3; Tlr3; Lgals9; Col1a2; Serpinb9
GO:0008289	lipid binding	molecular_function	3	341	119	19037	0.165316579	0.204037788	1.407402844	RGD1309808; Apol11a; Apol9a
GO:0007507	heart development	biological_process	7	341	297	19037	0.165500691	0.20415585	1.315787395	Acan; Ifitm3; Vcan; Casp7; Tnni3; Tnnt2; Mb
GO:0007628	adult walking behavior	biological_process	1	341	41	19037	0.166879577	0.205089491	1.361633646	Efnb3
GO:0036459	thiol-dependent ubiquitinyl hydrolase activity	molecular_function	1	341	41	19037	0.166879577	0.205089491	1.361633646	Usp18
GO:0045787	positive regulation of cell cycle	biological_process	1	341	41	19037	0.166879577	0.205089491	1.361633646	Trim21
GO:1901998	toxin transport	biological_process	1	341	41	19037	0.166879577	0.205089491	1.361633646	Dnaja1
GO:0016358	dendrite development	biological_process	1	341	41	19037	0.166879577	0.205089491	1.361633646	Cd3e
GO:0001656	metanephros development	biological_process	1	341	41	19037	0.166879577	0.205089491	1.361633646	Six2
GO:0007032	endosome organization	biological_process	1	341	41	19037	0.166879577	0.205089491	1.361633646	RGD1309995
GO:0034220	ion transmembrane transport	biological_process	3	341	120	19037	0.16878243	0.207317641	1.395674487	Mlc1; Grik4; Ano2
GO:0005509	calcium ion binding	molecular_function	14	341	635	19037	0.169042737	0.207526935	1.230831043	Itih4; Gch1; Acan; Vcan; Myl3; Myl4; Myl7; Actn2; Tnnc1; Atp2b2; Tnnt2; Capn8; Hrc; Clstn3
GO:0043204	perikaryon	cellular_component	4	341	164	19037	0.172008054	0.211055071	1.361633646	Rtn4r; Kcna2; Ngfr; Grik4
GO:0007409	axonogenesis	biological_process	3	341	121	19037	0.172273823	0.211268854	1.384139987	Rtn4r; Bcl11b; Cnp
GO:0005654	nucleoplasm	cellular_component	41	341	2021	19037	0.172802222	0.211699919	1.132561187	Cmtr1; Cd79b; Gch1; Tcf7; Trim21; Trim25; Socs1; Oas2; Oas3; Oasl; Upp1; Ubash3a; Parp9; Abtb2; LOC500956; Sap30; Oas1a; Oas1b; Oas1i; Pax5; Samhd1; Irf7; Phf11; Tox2; Gbp2; Pml; Mnda; Dcp2; Cnp; Adar; Lap3; RGD1309995; Stat1; Camk4; Ano2; Oasl2; Psme1; Psme2; Dtx3l; Papd7; Serpinb9
GO:0019233	sensory perception of pain	biological_process	2	341	80	19037	0.172958856	0.211699919	1.395674487	Kcna2; Ngfr
GO:0031623	receptor internalization	biological_process	1	341	42	19037	0.173267395	0.211699919	1.329213797	Ramp3
GO:0000775	chromosome, centromeric region	cellular_component	1	341	42	19037	0.173267395	0.211699919	1.329213797	Daxx
GO:0042738	exogenous drug catabolic process	biological_process	1	341	42	19037	0.173267395	0.211699919	1.329213797	Cyp2e1
GO:0030901	midbrain development	biological_process	1	341	42	19037	0.173267395	0.211699919	1.329213797	Rfx4
GO:0016740	transferase activity	molecular_function	1	341	42	19037	0.173267395	0.211699919	1.329213797	Oasl2
GO:0034599	cellular response to oxidative stress	biological_process	2	341	81	19037	0.17739703	0.216630871	1.378443938	Pnpt1; Ngfr
GO:0000781	chromosome, telomeric region	cellular_component	1	341	43	19037	0.179694231	0.218857143	1.298301848	Spo11
GO:0031267	small GTPase binding	molecular_function	1	341	43	19037	0.179694231	0.218857143	1.298301848	Rnf152
GO:0050776	regulation of immune response	biological_process	1	341	43	19037	0.179694231	0.218857143	1.298301848	Tnfrsf13c
GO:0048709	oligodendrocyte differentiation	biological_process	1	341	43	19037	0.179694231	0.218857143	1.298301848	Cnp
GO:0070555	response to interleukin-1	biological_process	1	341	43	19037	0.179694231	0.218857143	1.298301848	Lgals9
GO:0071363	cellular response to growth factor stimulus	biological_process	2	341	82	19037	0.181866424	0.221385921	1.361633646	Acan; Serpine1
GO:0006879	cellular iron ion homeostasis	biological_process	1	341	44	19037	0.186156651	0.225537822	1.268794988	Hfe2
GO:0000186	activation of MAPKK activity	biological_process	1	341	44	19037	0.186156651	0.225537822	1.268794988	Eif2ak2
GO:0050890	cognition	biological_process	1	341	44	19037	0.186156651	0.225537822	1.268794988	Jakmip1
GO:0006082	organic acid metabolic process	biological_process	1	341	44	19037	0.186156651	0.225537822	1.268794988	Cyp2e1
GO:0008395	steroid hydroxylase activity	molecular_function	1	341	44	19037	0.186156651	0.225537822	1.268794988	Cyp2e1
GO:0016197	endosomal transport	biological_process	1	341	44	19037	0.186156651	0.225537822	1.268794988	RGD1309995
GO:0043124	negative regulation of I-kappaB kinase/NF-kappaB signaling	biological_process	1	341	44	19037	0.186156651	0.225537822	1.268794988	Stat1
GO:0008544	epidermis development	biological_process	1	341	44	19037	0.186156651	0.225537822	1.268794988	Krt2
GO:0008333	endosome to lysosome transport	biological_process	1	341	44	19037	0.186156651	0.225537822	1.268794988	Dtx3l
GO:0042734	presynaptic membrane	cellular_component	2	341	83	19037	0.186365863	0.225554489	1.345228421	Kcna2; Grik4
GO:0048661	positive regulation of smooth muscle cell proliferation	biological_process	2	341	83	19037	0.186365863	0.225554489	1.345228421	Nampt; Stat1
GO:0019901	protein kinase binding	molecular_function	11	341	501	19037	0.19006383	0.229909497	1.225742064	Socs1; Trim5; Skap1; Myh6; Irgm; Mlkl; Eef1a2; Daxx; Tnni3; Cd6; Cd8a
GO:0030509	BMP signaling pathway	biological_process	2	341	84	19037	0.190894181	0.230430842	1.329213797	Hfe2; Myh6
GO:0034976	response to endoplasmic reticulum stress	biological_process	2	341	84	19037	0.190894181	0.230430842	1.329213797	Pdia5; Casp12
GO:1902476	chloride transmembrane transport	biological_process	2	341	84	19037	0.190894181	0.230430842	1.329213797	Clcn4; Slc26a3
GO:0070062	extracellular exosome	cellular_component	2	341	84	19037	0.190894181	0.230430842	1.329213797	Krt13; Serpine1
GO:0030544	Hsp70 protein binding	molecular_function	1	341	45	19037	0.192651332	0.232187611	1.240599544	Dnaja1
GO:0007517	muscle organ development	biological_process	1	341	45	19037	0.192651332	0.232187611	1.240599544	Csrp3
GO:0043473	pigmentation	biological_process	1	341	45	19037	0.192651332	0.232187611	1.240599544	Mfsd12
GO:0051082	unfolded protein binding	molecular_function	2	341	85	19037	0.19545022	0.235437948	1.313575988	Dnaja1; Tapbp
GO:0045184	establishment of protein localization	biological_process	1	341	46	19037	0.199175057	0.238927252	1.213629989	Carmil2
GO:0007173	epidermal growth factor receptor signaling pathway	biological_process	1	341	46	19037	0.199175057	0.238927252	1.213629989	Btc
GO:0015030	Cajal body	cellular_component	1	341	46	19037	0.199175057	0.238927252	1.213629989	Isg20
GO:0045907	positive regulation of vasoconstriction	biological_process	1	341	46	19037	0.199175057	0.238927252	1.213629989	Hrh1
GO:0010501	RNA secondary structure unwinding	biological_process	1	341	46	19037	0.199175057	0.238927252	1.213629989	Ddx3y
GO:0030218	erythrocyte differentiation	biological_process	1	341	46	19037	0.199175057	0.238927252	1.213629989	Adar
GO:1990841	promoter-specific chromatin binding	molecular_function	1	341	46	19037	0.199175057	0.238927252	1.213629989	Stat1
GO:0008168	methyltransferase activity	molecular_function	1	341	46	19037	0.199175057	0.238927252	1.213629989	Mettl11b
GO:0009611	response to wounding	biological_process	2	341	86	19037	0.20003283	0.23983157	1.298301848	Vcan; Ngfr
GO:0005741	mitochondrial outer membrane	cellular_component	3	341	129	19037	0.201056843	0.24080913	1.298301848	Dao; Rsad2; Cnp
GO:0042593	glucose homeostasis	biological_process	3	341	129	19037	0.201056843	0.24080913	1.298301848	Oas1a; Ngfr; Serpine1
GO:0019899	enzyme binding	molecular_function	9	341	411	19037	0.2043438	0.244619031	1.222488602	Parp9; Gbp1; Daxx; Cyp2e1; Cbs; Lgals9; Stat1; Parp14; Dtx3l
GO:0006635	fatty acid beta-oxidation	biological_process	1	341	47	19037	0.205724714	0.245381209	1.187808074	Fabp3
GO:0000381	regulation of alternative mRNA splicing, via spliceosome	biological_process	1	341	47	19037	0.205724714	0.245381209	1.187808074	Rbfox1
GO:0001817	regulation of cytokine production	biological_process	1	341	47	19037	0.205724714	0.245381209	1.187808074	Ubash3a
GO:0046034	ATP metabolic process	biological_process	1	341	47	19037	0.205724714	0.245381209	1.187808074	Myh6
GO:0001786	phosphatidylserine binding	molecular_function	1	341	47	19037	0.205724714	0.245381209	1.187808074	Havcr1
GO:0022900	electron transport chain	biological_process	1	341	47	19037	0.205724714	0.245381209	1.187808074	Aox2
GO:0070382	exocytic vesicle	cellular_component	1	341	47	19037	0.205724714	0.245381209	1.187808074	Mx2
GO:0031965	nuclear membrane	cellular_component	5	341	222	19037	0.208813711	0.248937007	1.257364403	Gch1; Phf11; Pml; Mx2; Papd7
GO:0007584	response to nutrient	biological_process	3	341	132	19037	0.212203436	0.25204843	1.268794988	Havcr1; Cd3e; Stat1
GO:0001580	detection of chemical stimulus involved in sensory perception of bitter taste	biological_process	1	341	48	19037	0.212297291	0.25204843	1.163062072	Rtp4
GO:0001657	ureteric bud development	biological_process	1	341	48	19037	0.212297291	0.25204843	1.163062072	Vcan
GO:0001102	RNA polymerase II activating transcription factor binding	molecular_function	1	341	48	19037	0.212297291	0.25204843	1.163062072	Ifi27
GO:0051321	meiotic cell cycle	biological_process	1	341	48	19037	0.212297291	0.25204843	1.163062072	Piwil4
GO:0016712	oxidoreductase activity, acting on paired donors, with incorporation or reduction of molecular oxygen, reduced flavin or flavoprotein as one donor, and incorporation of one atom of oxygen	molecular_function	1	341	48	19037	0.212297291	0.25204843	1.163062072	Cyp2e1
GO:0042752	regulation of circadian rhythm	biological_process	1	341	48	19037	0.212297291	0.25204843	1.163062072	Pml
GO:0001942	hair follicle development	biological_process	1	341	48	19037	0.212297291	0.25204843	1.163062072	Mfsd12
GO:0033138	positive regulation of peptidyl-serine phosphorylation	biological_process	2	341	89	19037	0.213928732	0.253724313	1.254538865	Ramp3; Irgm
GO:0016311	dephosphorylation	biological_process	2	341	89	19037	0.213928732	0.253724313	1.254538865	Nt5c3a; Pxylp1
GO:0045944	positive regulation of transcription by RNA polymerase II	biological_process	23	341	1125	19037	0.214915519	0.254763748	1.14135158	Hfe2; Ebf2; Egr3; Skap1; Nampt; Pax5; Bcl11b; Ddx58; Irf1; Irf7; Tox2; Daxx; Pml; Gtf2f2; Cd3d; Tlr3; Csrp3; Six2; Csrnp3; Helz2; Rfx4; Stat1; Nlrc5
GO:0021915	neural tube development	biological_process	1	341	49	19037	0.218889878	0.259075815	1.139326112	Tcf7
GO:0030864	cortical actin cytoskeleton	cellular_component	1	341	49	19037	0.218889878	0.259075815	1.139326112	Actn2
GO:0010862	positive regulation of pathway-restricted SMAD protein phosphorylation	biological_process	1	341	49	19037	0.218889878	0.259075815	1.139326112	Lgals9
GO:0051897	positive regulation of protein kinase B signaling	biological_process	2	341	91	19037	0.223304874	0.264165889	1.226966582	Ramp3; Ngfr
GO:0007568	aging	biological_process	7	341	323	19037	0.224214226	0.265105756	1.20987262	Ifi27l2b; Myh6; Pax5; Casp12; Abat; Casp7; Cnp
GO:0042493	response to drug	biological_process	11	341	520	19037	0.224471955	0.265274589	1.180955335	Fabp3; Acan; Socs1; Casp12; Abat; Havcr1; Cyp2e1; Kcnj11; Stat1; Psmb9; Papd7
GO:0043161	proteasome-mediated ubiquitin-dependent protein catabolic process	biological_process	4	341	181	19037	0.225018145	0.265537352	1.233745403	Abtb2; Pml; Psmb10; Psmb9
GO:0005198	structural molecule activity	molecular_function	4	341	181	19037	0.225018145	0.265537352	1.233745403	Cldn19; Krt13; Krt2; Krt5
GO:0030514	negative regulation of BMP signaling pathway	biological_process	1	341	50	19037	0.225499658	0.265537352	1.116539589	Hfe2
GO:0042149	cellular response to glucose starvation	biological_process	1	341	50	19037	0.225499658	0.265537352	1.116539589	Upp1
GO:0048678	response to axon injury	biological_process	1	341	50	19037	0.225499658	0.265537352	1.116539589	Kcnk2
GO:0048286	lung alveolus development	biological_process	1	341	50	19037	0.225499658	0.265537352	1.116539589	Slfn4
GO:0002931	response to ischemia	biological_process	1	341	50	19037	0.225499658	0.265537352	1.116539589	Kcnj11
GO:0072659	protein localization to plasma membrane	biological_process	3	341	136	19037	0.227325163	0.267550472	1.231477488	Ramp3; Skap1; Actn2
GO:0048471	perinuclear region of cytoplasm	cellular_component	14	341	673	19037	0.228098468	0.268323784	1.161333897	Csf1; Oas2; Eif2ak2; Dnaja1; Ptpn22; Mlc1; Hhatl; Gbp2; Cnp; Ogfr; Stat1; Mx1; Mx2; Stmn2
GO:0000978	RNA polymerase II proximal promoter sequence-specific DNA binding	molecular_function	9	341	423	19037	0.229062305	0.269320326	1.187808074	Batf2; Ebf2; Pax5; Bcl11b; Irf1; Tox2; Six2; Rfx4; Stat1
GO:0016491	oxidoreductase activity	molecular_function	3	341	137	19037	0.231148164	0.271496164	1.222488602	Faxdc2; Cyp2e1; Vat1l
GO:0007565	female pregnancy	biological_process	3	341	137	19037	0.231148164	0.271496164	1.222488602	Nampt; Irf1; Lgals9
GO:0043086	negative regulation of catalytic activity	biological_process	1	341	51	19037	0.23212391	0.271950246	1.094646656	Parp9
GO:0048705	skeletal system morphogenesis	biological_process	1	341	51	19037	0.23212391	0.271950246	1.094646656	Col2a1
GO:0030136	clathrin-coated vesicle	cellular_component	1	341	51	19037	0.23212391	0.271950246	1.094646656	Mlc1
GO:0051287	NAD binding	molecular_function	1	341	51	19037	0.23212391	0.271950246	1.094646656	Aox2
GO:0042626	ATPase activity, coupled to transmembrane movement of substances	molecular_function	1	341	51	19037	0.23212391	0.271950246	1.094646656	Tap1
GO:0005506	iron ion binding	molecular_function	4	341	184	19037	0.234847484	0.275001518	1.213629989	Cyp27a1; Cyp2e1; Aox2; Rplp2
GO:0005604	basement membrane	cellular_component	2	341	94	19037	0.237515513	0.277562433	1.187808074	Acan; Col2a1
GO:0043679	axon terminus	cellular_component	2	341	94	19037	0.237515513	0.277562433	1.187808074	Kcna2; Kcnk2
GO:0019903	protein phosphatase binding	molecular_function	2	341	94	19037	0.237515513	0.277562433	1.187808074	Skap1; Vcan
GO:0030900	forebrain development	biological_process	2	341	94	19037	0.237515513	0.277562433	1.187808074	Cnp; Rfx4
GO:0045597	positive regulation of cell differentiation	biological_process	1	341	52	19037	0.238760004	0.278171675	1.073595759	Btc
GO:0048365	Rac GTPase binding	molecular_function	1	341	52	19037	0.238760004	0.278171675	1.073595759	Sbk2
GO:0032024	positive regulation of insulin secretion	biological_process	1	341	52	19037	0.238760004	0.278171675	1.073595759	Abat
GO:0036126	sperm flagellum	cellular_component	1	341	52	19037	0.238760004	0.278171675	1.073595759	Ccr6
GO:0008630	intrinsic apoptotic signaling pathway in response to DNA damage	biological_process	1	341	52	19037	0.238760004	0.278171675	1.073595759	Pml
GO:0071310	cellular response to organic substance	biological_process	1	341	52	19037	0.238760004	0.278171675	1.073595759	Col1a2
GO:0003713	transcription coactivator activity	molecular_function	4	341	186	19037	0.241466826	0.281183367	1.200580204	Sp100; Daxx; Pml; Cd3d
GO:0030198	extracellular matrix organization	biological_process	2	341	95	19037	0.242287165	0.281854222	1.175304831	Rxfp1; Col19a1
GO:0071333	cellular response to glucose stimulus	biological_process	2	341	95	19037	0.242287165	0.281854222	1.175304831	Kcnj11; Serpine1
GO:0071392	cellular response to estradiol stimulus	biological_process	1	341	53	19037	0.245405398	0.284764032	1.053339235	Ramp3
GO:0031098	stress-activated protein kinase signaling cascade	biological_process	1	341	53	19037	0.245405398	0.284764032	1.053339235	Sbk2
GO:0007157	heterophilic cell-cell adhesion via plasma membrane cell adhesion molecules	biological_process	1	341	53	19037	0.245405398	0.284764032	1.053339235	Cd6
GO:0030178	negative regulation of Wnt signaling pathway	biological_process	1	341	53	19037	0.245405398	0.284764032	1.053339235	Aida
GO:0015631	tubulin binding	molecular_function	1	341	53	19037	0.245405398	0.284764032	1.053339235	Stmn2
GO:0035690	cellular response to drug	biological_process	2	341	96	19037	0.247074457	0.286556707	1.163062072	Tlr3; Serpine1
GO:0006629	lipid metabolic process	biological_process	2	341	97	19037	0.25187636	0.291749764	1.151071742	Faxdc2; Sult1d1
GO:0032147	activation of protein kinase activity	biological_process	2	341	97	19037	0.25187636	0.291749764	1.151071742	Sbk2; Daxx
GO:0001540	amyloid-beta binding	molecular_function	1	341	54	19037	0.252057639	0.291749764	1.033832953	Ngfr
GO:0050877	nervous system process	biological_process	1	341	54	19037	0.252057639	0.291749764	1.033832953	Kcnj11
GO:0021510	spinal cord development	biological_process	1	341	55	19037	0.258714355	0.299004874	1.01503599	Acan
GO:0000045	autophagosome assembly	biological_process	1	341	55	19037	0.258714355	0.299004874	1.01503599	Irgm
GO:0001890	placenta development	biological_process	1	341	55	19037	0.258714355	0.299004874	1.01503599	Serpine1
GO:0071456	cellular response to hypoxia	biological_process	3	341	145	19037	0.262257434	0.302948027	1.155040955	Kcnk2; Cbs; Serpine1
[truncated: 310 more rows]
