# Supplementary material for: Comprehensive Analysis of the Profiles of Differentially Expressed mRNAs, lncRNAs, and circRNAs in Phosgene-Induced Acute Lung Injury
Source: Biomed Res Int. 2021 Jan 9;2021:6278526. doi: 10.1155/2021/6278526 (PMC7811572; doi:10.1155/2021/6278526)
Supplement: Supplementary 11 — Table S11: GO with differentially expressed lncRNAs between the A and B group. [file 6278526.f11.txt]

Table S11 GO with differentially expressed lncRNAs between A and B group
id	Term	Category	ListHits	ListTotal	PopHits	PopTotal	pValue	qValue	Enrichment_score	Gene
GO:0010164	response to cesium ion	biological_process	1	139	1	10019	0	0	72.07913669	XR_593920.2
GO:0030186	melatonin metabolic process	biological_process	1	139	1	10019	0	0	72.07913669	XR_593920.2
GO:2000866	positive regulation of estradiol secretion	biological_process	1	139	1	10019	0	0	72.07913669	XR_593920.2
GO:0003096	renal sodium ion transport	biological_process	1	139	1	10019	0	0	72.07913669	XR_594934.1
GO:0034635	glutathione transport	biological_process	1	139	1	10019	0	0	72.07913669	XR_594934.1
GO:0044062	regulation of excretion	biological_process	1	139	1	10019	0	0	72.07913669	XR_594934.1
GO:0070293	renal absorption	biological_process	1	139	1	10019	0	0	72.07913669	XR_594934.1
GO:0097291	renal phosphate ion absorption	biological_process	1	139	1	10019	0	0	72.07913669	XR_594934.1
GO:0008176	tRNA (guanine-N7-)-methyltransferase activity	molecular_function	1	139	1	10019	0	0	72.07913669	XR_597351.2
GO:0043527	tRNA methyltransferase complex	cellular_component	1	139	1	10019	0	0	72.07913669	XR_597351.2
GO:0106004	tRNA (guanine-N7)-methylation	biological_process	1	139	1	10019	0	0	72.07913669	XR_597351.2
GO:1990923	PET complex	cellular_component	1	139	1	10019	0	0	72.07913669	TCONS_00000804
GO:0061301	cerebellum vasculature morphogenesis	biological_process	1	139	1	10019	0	0	72.07913669	TCONS_00001104
GO:0000322	storage vacuole	cellular_component	1	139	1	10019	0	0	72.07913669	TCONS_00005424
GO:0070254	mucus secretion	biological_process	1	139	1	10019	0	0	72.07913669	TCONS_00005424
GO:0070212	protein poly-ADP-ribosylation	biological_process	3	139	3	10019	0	0	72.07913669	TCONS_00008354; TCONS_00008355; TCONS_00008356
GO:1902216	positive regulation of interleukin-4-mediated signaling pathway	biological_process	3	139	3	10019	0	0	72.07913669	TCONS_00008354; TCONS_00008355; TCONS_00008356
GO:0043259	laminin-10 complex	cellular_component	1	139	1	10019	0	0	72.07913669	TCONS_00010821
GO:0045541	negative regulation of cholesterol biosynthetic process	biological_process	2	139	2	10019	0	0	72.07913669	TCONS_00015640; TCONS_00015641
GO:0045345	positive regulation of MHC class I biosynthetic process	biological_process	1	139	1	10019	0	0	72.07913669	TCONS_00018760
GO:0060335	positive regulation of interferon-gamma-mediated signaling pathway	biological_process	1	139	1	10019	0	0	72.07913669	TCONS_00018760
GO:0060339	negative regulation of type I interferon-mediated signaling pathway	biological_process	1	139	1	10019	0	0	72.07913669	TCONS_00018760
GO:0003071	renal system process involved in regulation of systemic arterial blood pressure	biological_process	1	139	1	10019	0	0	72.07913669	TCONS_00020289
GO:0003174	mitral valve development	biological_process	1	139	1	10019	0	0	72.07913669	TCONS_00020289
GO:0003193	pulmonary valve formation	biological_process	1	139	1	10019	0	0	72.07913669	TCONS_00020289
GO:0003284	septum primum development	biological_process	1	139	1	10019	0	0	72.07913669	TCONS_00020289
GO:0003294	atrial ventricular junction remodeling	biological_process	1	139	1	10019	0	0	72.07913669	TCONS_00020289
GO:0010643	cell communication by chemical coupling	biological_process	1	139	1	10019	0	0	72.07913669	TCONS_00020289
GO:0010644	cell communication by electrical coupling	biological_process	1	139	1	10019	0	0	72.07913669	TCONS_00020289
GO:0010652	positive regulation of cell communication by chemical coupling	biological_process	1	139	1	10019	0	0	72.07913669	TCONS_00020289
GO:0035922	foramen ovale closure	biological_process	1	139	1	10019	0	0	72.07913669	TCONS_00020289
GO:0060373	regulation of ventricular cardiac muscle cell membrane depolarization	biological_process	1	139	1	10019	0	0	72.07913669	TCONS_00020289
GO:0086044	atrial cardiac muscle cell to AV node cell communication by electrical coupling	biological_process	1	139	1	10019	0	0	72.07913669	TCONS_00020289
GO:0086054	bundle of His cell to Purkinje myocyte communication by electrical coupling	biological_process	1	139	1	10019	0	0	72.07913669	TCONS_00020289
GO:0086065	cell communication involved in cardiac conduction	biological_process	1	139	1	10019	0	0	72.07913669	TCONS_00020289
GO:0086067	AV node cell to bundle of His cell communication	biological_process	1	139	1	10019	0	0	72.07913669	TCONS_00020289
GO:0086075	gap junction channel activity involved in cardiac conduction electrical coupling	molecular_function	1	139	1	10019	0	0	72.07913669	TCONS_00020289
GO:0086076	gap junction channel activity involved in atrial cardiac muscle cell-AV node cell electrical coupling	molecular_function	1	139	1	10019	0	0	72.07913669	TCONS_00020289
GO:0086078	gap junction channel activity involved in bundle of His cell-Purkinje myocyte electrical coupling	molecular_function	1	139	1	10019	0	0	72.07913669	TCONS_00020289
GO:0098905	regulation of bundle of His cell action potential	biological_process	1	139	1	10019	0	0	72.07913669	TCONS_00020289
GO:0098906	regulation of Purkinje myocyte action potential	biological_process	1	139	1	10019	0	0	72.07913669	TCONS_00020289
GO:1900133	regulation of renin secretion into blood stream	biological_process	1	139	1	10019	0	0	72.07913669	TCONS_00020289
GO:1990029	vasomotion	biological_process	1	139	1	10019	0	0	72.07913669	TCONS_00020289
GO:0010710	regulation of collagen catabolic process	biological_process	2	139	2	10019	0	0	72.07913669	TCONS_00025508; TCONS_00025509
GO:0010716	negative regulation of extracellular matrix disassembly	biological_process	2	139	2	10019	0	0	72.07913669	TCONS_00025508; TCONS_00025509
GO:1902362	melanocyte apoptotic process	biological_process	2	139	2	10019	0	0	72.07913669	TCONS_00025508; TCONS_00025509
GO:1903054	negative regulation of extracellular matrix organization	biological_process	2	139	2	10019	0	0	72.07913669	TCONS_00025508; TCONS_00025509
GO:0009597	detection of virus	biological_process	1	139	1	10019	0	0	72.07913669	TCONS_00030445
GO:0035549	positive regulation of interferon-beta secretion	biological_process	1	139	1	10019	0	0	72.07913669	TCONS_00030445
GO:1902741	positive regulation of interferon-alpha secretion	biological_process	1	139	1	10019	0	0	72.07913669	TCONS_00030445
GO:0020005	symbiont-containing vacuole membrane	cellular_component	3	139	4	10019	3.55E-08	9.18E-07	54.05935252	XR_359427.1; TCONS_00020546; TCONS_00020554
GO:0060336	negative regulation of interferon-gamma-mediated signaling pathway	biological_process	3	139	4	10019	3.55E-08	9.18E-07	54.05935252	TCONS_00008354; TCONS_00008355; TCONS_00008356
GO:0016779	nucleotidyltransferase activity	molecular_function	4	139	12	10019	3.50E-07	8.89E-06	24.0263789	TCONS_00009633; TCONS_00009645; TCONS_00009679; TCONS_00010402
GO:0035458	cellular response to interferon-beta	biological_process	5	139	22	10019	3.98E-07	9.91E-06	16.38162198	TCONS_00017460; TCONS_00017461; TCONS_00017475; TCONS_00020546; TCONS_00020554
GO:0033522	histone H2A ubiquitination	biological_process	3	139	6	10019	5.21E-07	1.19E-05	36.03956835	TCONS_00008340; TCONS_00008343; TCONS_00008344
GO:0097677	STAT family protein binding	molecular_function	3	139	6	10019	5.21E-07	1.19E-05	36.03956835	TCONS_00008340; TCONS_00008343; TCONS_00008344
GO:1901666	positive regulation of NAD+ ADP-ribosyltransferase activity	biological_process	3	139	6	10019	5.21E-07	1.19E-05	36.03956835	TCONS_00008340; TCONS_00008343; TCONS_00008344
GO:2001034	positive regulation of double-strand break repair via nonhomologous end joining	biological_process	3	139	6	10019	5.21E-07	1.19E-05	36.03956835	TCONS_00008340; TCONS_00008343; TCONS_00008344
GO:0006754	ATP biosynthetic process	biological_process	3	139	6	10019	5.21E-07	1.19E-05	36.03956835	TCONS_00026745; TCONS_00026759; TCONS_00026760
GO:0051607	defense response to virus	biological_process	8	139	72	10019	5.96E-07	1.34E-05	8.008792966	XR_361445.3; TCONS_00003494; TCONS_00009633; TCONS_00009645; TCONS_00009679; TCONS_00010402; TCONS_00018760; TCONS_00030445
GO:0042832	defense response to protozoan	biological_process	3	139	7	10019	1.20E-06	2.61E-05	30.89105858	XR_359427.1; TCONS_00020546; TCONS_00020554
GO:0070403	NAD+ binding	molecular_function	3	139	7	10019	1.20E-06	2.61E-05	30.89105858	TCONS_00008354; TCONS_00008355; TCONS_00008356
GO:0042532	negative regulation of tyrosine phosphorylation of STAT protein	biological_process	4	139	15	10019	1.28E-06	2.74E-05	19.22110312	XR_001837541.1; TCONS_00008354; TCONS_00008355; TCONS_00008356
GO:1902966	positive regulation of protein localization to early endosome	biological_process	3	139	8	10019	2.38E-06	4.92E-05	27.02967626	TCONS_00008340; TCONS_00008343; TCONS_00008344
GO:0015810	aspartate transmembrane transport	biological_process	3	139	8	10019	2.38E-06	4.92E-05	27.02967626	TCONS_00026745; TCONS_00026759; TCONS_00026760
GO:0060158	phospholipase C-activating dopamine receptor signaling pathway	biological_process	2	139	3	10019	2.61E-06	5.02E-05	48.05275779	XR_594934.1; TCONS_00002048
GO:0001730	2'-5'-oligoadenylate synthetase activity	molecular_function	2	139	3	10019	2.61E-06	5.02E-05	48.05275779	TCONS_00009633; TCONS_00010402
GO:0060700	regulation of ribonuclease activity	biological_process	2	139	3	10019	2.61E-06	5.02E-05	48.05275779	TCONS_00009633; TCONS_00010402
GO:0019002	GMP binding	molecular_function	2	139	3	10019	2.61E-06	5.02E-05	48.05275779	TCONS_00020546; TCONS_00020554
GO:0071438	invadopodium membrane	cellular_component	2	139	3	10019	2.61E-06	5.02E-05	48.05275779	TCONS_00025508; TCONS_00025509
GO:0010390	histone monoubiquitination	biological_process	4	139	18	10019	3.54E-06	6.71E-05	16.01758593	TCONS_00008340; TCONS_00008343; TCONS_00008344; TCONS_00016901
GO:0015183	L-aspartate transmembrane transporter activity	molecular_function	3	139	9	10019	4.24E-06	7.91E-05	24.0263789	TCONS_00026745; TCONS_00026759; TCONS_00026760
GO:0002230	positive regulation of defense response to virus by host	biological_process	4	139	19	10019	4.76E-06	8.76E-05	15.17455509	TCONS_00008340; TCONS_00008343; TCONS_00008344; TCONS_00030445
GO:0003725	double-stranded RNA binding	molecular_function	5	139	33	10019	5.21E-06	9.47E-05	10.92108132	TCONS_00009633; TCONS_00009645; TCONS_00009679; TCONS_00010402; TCONS_00030445
GO:0003924	GTPase activity	molecular_function	11	139	177	10019	6.04E-06	0.000108387	4.479494371	XR_001836935.1; XR_353862.3; XR_353861.3; TCONS_00002048; TCONS_00011813; TCONS_00011814; TCONS_00017460; TCONS_00017461; TCONS_00017475; TCONS_00020546; TCONS_00020554
GO:2000646	positive regulation of receptor catabolic process	biological_process	3	139	10	10019	6.98E-06	0.0001236	21.62374101	TCONS_00008340; TCONS_00008343; TCONS_00008344
GO:0003950	NAD+ ADP-ribosyltransferase activity	molecular_function	4	139	21	10019	8.14E-06	0.000142165	13.72935937	TCONS_00008354; TCONS_00008355; TCONS_00008356; TCONS_00026909
GO:0061682	seminal vesicle morphogenesis	biological_process	2	139	4	10019	1.03E-05	0.000173988	36.03956835	XR_001841828.1; XR_596655.2
GO:0044406	adhesion of symbiont to host	biological_process	2	139	4	10019	1.03E-05	0.000173988	36.03956835	TCONS_00020546; TCONS_00020554
GO:0060244	negative regulation of cell proliferation involved in contact inhibition	biological_process	2	139	4	10019	1.03E-05	0.000173988	36.03956835	TCONS_00025508; TCONS_00025509
GO:0035563	positive regulation of chromatin binding	biological_process	3	139	11	10019	1.09E-05	0.000178079	19.65794637	TCONS_00008340; TCONS_00008343; TCONS_00008344
GO:0051444	negative regulation of ubiquitin-protein transferase activity	biological_process	3	139	11	10019	1.09E-05	0.000178079	19.65794637	TCONS_00008340; TCONS_00008343; TCONS_00008344
GO:0010038	response to metal ion	biological_process	3	139	12	10019	1.61E-05	0.000261063	18.01978417	XR_593920.2; XR_001842563.1; ENSRNOT00000092503
GO:0070373	negative regulation of ERK1 and ERK2 cascade	biological_process	6	139	62	10019	2.21E-05	0.000354359	6.975400325	XR_001837541.1; XR_001840129.1; XR_594631.2; XR_594934.1; TCONS_00020546; TCONS_00020554
GO:0033523	histone H2B ubiquitination	biological_process	3	139	13	10019	2.30E-05	0.000360023	16.63364693	TCONS_00008340; TCONS_00008343; TCONS_00008344
GO:0006471	protein ADP-ribosylation	biological_process	3	139	13	10019	2.30E-05	0.000360023	16.63364693	TCONS_00008354; TCONS_00008355; TCONS_00008356
GO:0072738	cellular response to diamide	biological_process	2	139	5	10019	2.56E-05	0.000382704	28.83165468	XR_001842563.1; ENSRNOT00000092503
GO:0015910	peroxisomal long-chain fatty acid import	biological_process	2	139	5	10019	2.56E-05	0.000382704	28.83165468	TCONS_00021862; TCONS_00021863
GO:0008239	dipeptidyl-peptidase activity	molecular_function	2	139	5	10019	2.56E-05	0.000382704	28.83165468	TCONS_00025508; TCONS_00025509
GO:0097325	melanocyte proliferation	biological_process	2	139	5	10019	2.56E-05	0.000382704	28.83165468	TCONS_00025508; TCONS_00025509
GO:0019955	cytokine binding	molecular_function	3	139	14	10019	3.19E-05	0.000461085	15.44552929	TCONS_00001104; TCONS_00020546; TCONS_00020554
GO:0043490	malate-aspartate shuttle	biological_process	3	139	14	10019	3.19E-05	0.000461085	15.44552929	TCONS_00026745; TCONS_00026759; TCONS_00026760
GO:0045333	cellular respiration	biological_process	3	139	14	10019	3.19E-05	0.000461085	15.44552929	TCONS_00026745; TCONS_00026759; TCONS_00026760
GO:0005525	GTP binding	molecular_function	11	139	215	10019	4.26E-05	0.000608903	3.687769784	XR_001836935.1; XR_353862.3; XR_353861.3; TCONS_00002048; TCONS_00011813; TCONS_00011814; TCONS_00017460; TCONS_00017461; TCONS_00017475; TCONS_00020546; TCONS_00020554
GO:0044389	ubiquitin-like protein ligase binding	molecular_function	3	139	15	10019	4.30E-05	0.000608903	14.41582734	TCONS_00008340; TCONS_00008343; TCONS_00008344
GO:0071454	cellular response to anoxia	biological_process	2	139	6	10019	5.07E-05	0.000688748	24.0263789	XR_001842563.1; ENSRNOT00000092503
GO:1900041	negative regulation of interleukin-2 secretion	biological_process	2	139	6	10019	5.07E-05	0.000688748	24.0263789	TCONS_00020546; TCONS_00020554
GO:0005324	long-chain fatty acid transporter activity	molecular_function	2	139	6	10019	5.07E-05	0.000688748	24.0263789	TCONS_00021862; TCONS_00021863
GO:0042760	very long-chain fatty acid catabolic process	biological_process	2	139	6	10019	5.07E-05	0.000688748	24.0263789	TCONS_00021862; TCONS_00021863
GO:0004857	enzyme inhibitor activity	molecular_function	3	139	16	10019	5.67E-05	0.00075544	13.51483813	TCONS_00008340; TCONS_00008343; TCONS_00008344
GO:1903077	negative regulation of protein localization to plasma membrane	biological_process	3	139	16	10019	5.67E-05	0.00075544	13.51483813	TCONS_00020546; TCONS_00020554; TCONS_00024750
GO:0071850	mitotic cell cycle arrest	biological_process	4	139	31	10019	6.08E-05	0.00080151	9.300533767	XR_001840129.1; XR_594631.2; TCONS_00025508; TCONS_00025509
GO:0051603	proteolysis involved in cellular protein catabolic process	biological_process	3	139	17	10019	7.34E-05	0.000958302	12.71984765	XR_001839825.1; TCONS_00025508; TCONS_00025509
GO:0001553	luteinization	biological_process	2	139	7	10019	8.78E-05	0.001064078	20.59403905	XR_593920.2; TCONS_00001104
GO:0008330	protein tyrosine/threonine phosphatase activity	molecular_function	2	139	7	10019	8.78E-05	0.001064078	20.59403905	XR_001840129.1; XR_594631.2
GO:0090266	regulation of mitotic cell cycle spindle assembly checkpoint	biological_process	2	139	7	10019	8.78E-05	0.001064078	20.59403905	XR_001840129.1; XR_594631.2
GO:0022010	central nervous system myelination	biological_process	2	139	7	10019	8.78E-05	0.001064078	20.59403905	XR_001841828.1; XR_596655.2
GO:0001741	XY body	cellular_component	2	139	7	10019	8.78E-05	0.001064078	20.59403905	XR_001842563.1; ENSRNOT00000092503
GO:0030578	PML body organization	biological_process	2	139	7	10019	8.78E-05	0.001064078	20.59403905	XR_001842563.1; ENSRNOT00000092503
GO:0033129	positive regulation of histone phosphorylation	biological_process	2	139	7	10019	8.78E-05	0.001064078	20.59403905	XR_001842563.1; ENSRNOT00000092503
GO:1903936	cellular response to sodium arsenite	biological_process	2	139	7	10019	8.78E-05	0.001064078	20.59403905	XR_001842563.1; ENSRNOT00000092503
GO:0045071	negative regulation of viral genome replication	biological_process	3	139	18	10019	9.33E-05	0.001111016	12.01318945	TCONS_00003494; TCONS_00009633; TCONS_00010402
GO:0007031	peroxisome organization	biological_process	3	139	18	10019	9.33E-05	0.001111016	12.01318945	TCONS_00019669; TCONS_00021862; TCONS_00021863
GO:0005778	peroxisomal membrane	cellular_component	4	139	34	10019	9.63E-05	0.001135836	8.479898434	XR_001837541.1; TCONS_00019669; TCONS_00021862; TCONS_00021863
GO:0019899	enzyme binding	molecular_function	13	139	313	10019	0.000109493	0.001280592	2.993702163	XR_001836930.1; XR_001837541.1; XR_001842563.1; ENSRNOT00000092503; TCONS_00008340; TCONS_00008343; TCONS_00008344; TCONS_00008354; TCONS_00008355; TCONS_00008356; TCONS_00020546; TCONS_00020554; TCONS_00028060
GO:1903593	regulation of histamine secretion by mast cell	biological_process	2	139	8	10019	0.000139078	0.001585258	18.01978417	XR_001838416.1; TCONS_00005424
GO:0051447	negative regulation of meiotic cell cycle	biological_process	2	139	8	10019	0.000139078	0.001585258	18.01978417	XR_001840129.1; XR_594631.2
GO:0050848	regulation of calcium-mediated signaling	biological_process	2	139	8	10019	0.000139078	0.001585258	18.01978417	TCONS_00020546; TCONS_00020554
GO:0005313	L-glutamate transmembrane transporter activity	molecular_function	3	139	20	10019	0.000144638	0.001606537	10.8118705	TCONS_00026745; TCONS_00026759; TCONS_00026760
GO:1900182	positive regulation of protein localization to nucleus	biological_process	4	139	37	10019	0.00014586	0.001606537	7.792339102	XR_592045.2; TCONS_00008340; TCONS_00008343; TCONS_00008344
GO:0042393	histone binding	molecular_function	5	139	60	10019	0.000173163	0.001606537	6.006594724	XR_001842563.1; ENSRNOT00000092503; TCONS_00008340; TCONS_00008343; TCONS_00008344
GO:0000188	inactivation of MAPK activity	biological_process	3	139	21	10019	0.000176756	0.001606537	10.29701953	XR_001837541.1; XR_001840129.1; XR_594631.2
GO:0008622	epsilon DNA polymerase complex	cellular_component	1	139	2	10019	0.000191112	0.001606537	36.03956835	XR_001837617.1
GO:0002677	negative regulation of chronic inflammatory response	biological_process	1	139	2	10019	0.000191112	0.001606537	36.03956835	XR_593920.2
GO:0006710	androgen catabolic process	biological_process	1	139	2	10019	0.000191112	0.001606537	36.03956835	XR_593920.2
GO:0018879	biphenyl metabolic process	biological_process	1	139	2	10019	0.000191112	0.001606537	36.03956835	XR_593920.2
GO:0018894	dibenzo-p-dioxin metabolic process	biological_process	1	139	2	10019	0.000191112	0.001606537	36.03956835	XR_593920.2
GO:0030690	Noc1p-Noc2p complex	cellular_component	1	139	2	10019	0.000191112	0.001606537	36.03956835	XR_001839825.1
GO:0035877	death effector domain binding	molecular_function	1	139	2	10019	0.000191112	0.001606537	36.03956835	XR_001839825.1
GO:0036462	TRAIL-activated apoptotic signaling pathway	biological_process	1	139	2	10019	0.000191112	0.001606537	36.03956835	XR_001839825.1
GO:0097202	activation of cysteine-type endopeptidase activity	biological_process	1	139	2	10019	0.000191112	0.001606537	36.03956835	XR_001839825.1
GO:2001233	regulation of apoptotic signaling pathway	biological_process	1	139	2	10019	0.000191112	0.001606537	36.03956835	XR_001839825.1
GO:0015491	cation:cation antiporter activity	molecular_function	1	139	2	10019	0.000191112	0.001606537	36.03956835	XR_594688.1
GO:0042891	antibiotic transport	biological_process	1	139	2	10019	0.000191112	0.001606537	36.03956835	XR_594688.1
GO:0042895	antibiotic transmembrane transporter activity	molecular_function	1	139	2	10019	0.000191112	0.001606537	36.03956835	XR_594688.1
GO:0052106	quorum sensing involved in interaction with host	biological_process	1	139	2	10019	0.000191112	0.001606537	36.03956835	XR_594688.1
GO:0060731	positive regulation of intestinal epithelial structure maintenance	biological_process	1	139	2	10019	0.000191112	0.001606537	36.03956835	XR_594688.1
GO:0070715	sodium-dependent organic cation transport	biological_process	1	139	2	10019	0.000191112	0.001606537	36.03956835	XR_594688.1
GO:1902603	carnitine transmembrane transport	biological_process	1	139	2	10019	0.000191112	0.001606537	36.03956835	XR_594688.1
GO:0032416	negative regulation of sodium:proton antiporter activity	biological_process	1	139	2	10019	0.000191112	0.001606537	36.03956835	XR_594934.1
GO:0032782	bile acid secretion	biological_process	1	139	2	10019	0.000191112	0.001606537	36.03956835	XR_594934.1
GO:0050780	dopamine receptor binding	molecular_function	1	139	2	10019	0.000191112	0.001606537	36.03956835	XR_594934.1
GO:0045653	negative regulation of megakaryocyte differentiation	biological_process	1	139	2	10019	0.000191112	0.001606537	36.03956835	XR_359427.1
GO:0048248	CXCR3 chemokine receptor binding	molecular_function	1	139	2	10019	0.000191112	0.001606537	36.03956835	XR_359427.1
GO:0097679	other organism cytoplasm	cellular_component	1	139	2	10019	0.000191112	0.001606537	36.03956835	XR_359427.1
GO:0035426	extracellular matrix-cell signaling	biological_process	1	139	2	10019	0.000191112	0.001606537	36.03956835	TCONS_00001104
GO:0106003	amyloid-beta complex	cellular_component	1	139	2	10019	0.000191112	0.001606537	36.03956835	TCONS_00001104
GO:0043308	eosinophil degranulation	biological_process	1	139	2	10019	0.000191112	0.001606537	36.03956835	TCONS_00005424
GO:0060627	regulation of vesicle-mediated transport	biological_process	1	139	2	10019	0.000191112	0.001606537	36.03956835	TCONS_00005424
GO:1903421	regulation of synaptic vesicle recycling	biological_process	1	139	2	10019	0.000191112	0.001606537	36.03956835	TCONS_00005424
GO:0005606	laminin-1 complex	cellular_component	1	139	2	10019	0.000191112	0.001606537	36.03956835	TCONS_00010821
GO:0050992	dimethylallyl diphosphate biosynthetic process	biological_process	1	139	2	10019	0.000191112	0.001606537	36.03956835	TCONS_00016893
GO:0003105	negative regulation of glomerular filtration	biological_process	1	139	2	10019	0.000191112	0.001606537	36.03956835	TCONS_00020289
GO:0055077	gap junction hemi-channel activity	molecular_function	1	139	2	10019	0.000191112	0.001606537	36.03956835	TCONS_00020289
GO:0086015	SA node cell action potential	biological_process	1	139	2	10019	0.000191112	0.001606537	36.03956835	TCONS_00020289
GO:0098904	regulation of AV node cell action potential	biological_process	1	139	2	10019	0.000191112	0.001606537	36.03956835	TCONS_00020289
GO:0098910	regulation of atrial cardiac muscle cell action potential	biological_process	1	139	2	10019	0.000191112	0.001606537	36.03956835	TCONS_00020289
GO:1900825	regulation of membrane depolarization during cardiac muscle cell action potential	biological_process	1	139	2	10019	0.000191112	0.001606537	36.03956835	TCONS_00020289
GO:0032485	regulation of Ral protein signal transduction	biological_process	1	139	2	10019	0.000191112	0.001606537	36.03956835	TCONS_00025305
GO:0039529	RIG-I signaling pathway	biological_process	1	139	2	10019	0.000191112	0.001606537	36.03956835	TCONS_00030445
GO:0071360	cellular response to exogenous dsRNA	biological_process	2	139	9	10019	0.0002065	0.001693548	16.01758593	XR_001837541.1; TCONS_00030445
GO:0017017	MAP kinase tyrosine/serine/threonine phosphatase activity	molecular_function	2	139	9	10019	0.0002065	0.001693548	16.01758593	XR_001840129.1; XR_594631.2
GO:0002485	antigen processing and presentation of endogenous peptide antigen via MHC class I via ER pathway, TAP-dependent	biological_process	2	139	9	10019	0.0002065	0.001693548	16.01758593	TCONS_00022311; TCONS_00022340
GO:0045178	basal part of cell	cellular_component	2	139	9	10019	0.0002065	0.001693548	16.01758593	TCONS_00025508; TCONS_00025509
GO:2001244	positive regulation of intrinsic apoptotic signaling pathway	biological_process	3	139	22	10019	0.00021372	0.001731649	9.828973185	XR_001837541.1; XR_594934.1; XR_361445.3
GO:0008047	enzyme activator activity	molecular_function	3	139	22	10019	0.00021372	0.001731649	9.828973185	TCONS_00008340; TCONS_00008343; TCONS_00008344
GO:0006302	double-strand break repair	biological_process	3	139	23	10019	0.000255943	0.00204907	9.401626525	TCONS_00008340; TCONS_00008343; TCONS_00008344
GO:0015813	L-glutamate transmembrane transport	biological_process	3	139	23	10019	0.000255943	0.00204907	9.401626525	TCONS_00026745; TCONS_00026759; TCONS_00026760
GO:0002474	antigen processing and presentation of peptide antigen via MHC class I	biological_process	4	139	42	10019	0.000269261	0.002142931	6.864679685	TCONS_00022094; TCONS_00022311; TCONS_00022340; TCONS_00023121
GO:0006955	immune response	biological_process	8	139	154	10019	0.000283648	0.002244153	3.744370737	XR_359427.1; TCONS_00009633; TCONS_00009645; TCONS_00009679; TCONS_00010402; TCONS_00022311; TCONS_00022340; TCONS_00023121
GO:2000279	negative regulation of DNA biosynthetic process	biological_process	2	139	10	10019	0.000292006	0.002244276	14.41582734	XR_001840129.1; XR_594631.2
GO:0046974	histone methyltransferase activity (H3-K9 specific)	molecular_function	2	139	10	10019	0.000292006	0.002244276	14.41582734	XR_359962.3; TCONS_00014246
GO:0051567	histone H3-K9 methylation	biological_process	2	139	10	10019	0.000292006	0.002244276	14.41582734	XR_359962.3; TCONS_00014246
GO:0060741	prostate gland stromal morphogenesis	biological_process	2	139	10	10019	0.000292006	0.002244276	14.41582734	XR_001841828.1; XR_596655.2
GO:0045717	negative regulation of fatty acid biosynthetic process	biological_process	2	139	10	10019	0.000292006	0.002244276	14.41582734	TCONS_00015640; TCONS_00015641
GO:0016605	PML body	cellular_component	4	139	43	10019	0.000301324	0.002302729	6.705035971	XR_001838477.1; XR_001842563.1; ENSRNOT00000092503; TCONS_00003494
GO:0042605	peptide antigen binding	molecular_function	4	139	44	10019	0.000336201	0.002554744	6.55264879	TCONS_00022094; TCONS_00022311; TCONS_00022340; TCONS_00023121
GO:0051592	response to calcium ion	biological_process	6	139	95	10019	0.000340121	0.002570014	4.552366528	XR_001837541.1; XR_001840129.1; XR_594631.2; TCONS_00026745; TCONS_00026759; TCONS_00026760
GO:0032933	SREBP signaling pathway	biological_process	2	139	11	10019	0.000397437	0.002969738	13.10529758	TCONS_00015640; TCONS_00015641
GO:0005782	peroxisomal matrix	cellular_component	2	139	11	10019	0.000397437	0.002969738	13.10529758	TCONS_00021862; TCONS_00021863
GO:0001706	endoderm formation	biological_process	3	139	27	10019	0.000485899	0.003366109	8.008792966	XR_001840129.1; XR_594631.2; TCONS_00013688
GO:0051865	protein autoubiquitination	biological_process	3	139	27	10019	0.000485899	0.003366109	8.008792966	TCONS_00008340; TCONS_00008343; TCONS_00008344
GO:0032183	SUMO binding	molecular_function	2	139	12	10019	0.000524546	0.003366109	12.01318945	XR_001842563.1; ENSRNOT00000092503
GO:0071280	cellular response to copper ion	biological_process	2	139	12	10019	0.000524546	0.003366109	12.01318945	XR_001842563.1; ENSRNOT00000092503
GO:0006635	fatty acid beta-oxidation	biological_process	3	139	28	10019	0.000560823	0.003366109	7.722764645	TCONS_00019669; TCONS_00021862; TCONS_00021863
GO:0005272	sodium channel activity	molecular_function	1	139	3	10019	0.000568109	0.003366109	24.0263789	XR_590452.1
GO:0034706	sodium channel complex	cellular_component	1	139	3	10019	0.000568109	0.003366109	24.0263789	XR_590452.1
GO:0021503	neural fold bending	biological_process	1	139	3	10019	0.000568109	0.003366109	24.0263789	XR_592751.2
GO:0004506	squalene monooxygenase activity	molecular_function	1	139	3	10019	0.000568109	0.003366109	24.0263789	XR_001839103.1
GO:0006725	cellular aromatic compound metabolic process	biological_process	1	139	3	10019	0.000568109	0.003366109	24.0263789	XR_001839103.1
GO:0006703	estrogen biosynthetic process	biological_process	1	139	3	10019	0.000568109	0.003366109	24.0263789	XR_593920.2
GO:0008207	C21-steroid hormone metabolic process	biological_process	1	139	3	10019	0.000568109	0.003366109	24.0263789	XR_593920.2
GO:0061370	testosterone biosynthetic process	biological_process	1	139	3	10019	0.000568109	0.003366109	24.0263789	XR_593920.2
GO:0004908	interleukin-1 receptor activity	molecular_function	1	139	3	10019	0.000568109	0.003366109	24.0263789	XR_594354.2
GO:0004910	interleukin-1, Type II, blocking receptor activity	molecular_function	1	139	3	10019	0.000568109	0.003366109	24.0263789	XR_594354.2
GO:0019966	interleukin-1 binding	molecular_function	1	139	3	10019	0.000568109	0.003366109	24.0263789	XR_594354.2
GO:0031264	death-inducing signaling complex	cellular_component	1	139	3	10019	0.000568109	0.003366109	24.0263789	XR_001839825.1
GO:0031265	CD95 death-inducing signaling complex	cellular_component	1	139	3	10019	0.000568109	0.003366109	24.0263789	XR_001839825.1
GO:0070243	regulation of thymocyte apoptotic process	biological_process	1	139	3	10019	0.000568109	0.003366109	24.0263789	XR_001839825.1
GO:0015651	quaternary ammonium group transmembrane transporter activity	molecular_function	1	139	3	10019	0.000568109	0.003366109	24.0263789	XR_594688.1
GO:0015697	quaternary ammonium group transport	biological_process	1	139	3	10019	0.000568109	0.003366109	24.0263789	XR_594688.1
GO:0010642	negative regulation of platelet-derived growth factor receptor signaling pathway	biological_process	1	139	3	10019	0.000568109	0.003366109	24.0263789	XR_594934.1
GO:0010766	negative regulation of sodium ion transport	biological_process	1	139	3	10019	0.000568109	0.003366109	24.0263789	XR_594934.1
GO:0032426	stereocilium tip	cellular_component	1	139	3	10019	0.000568109	0.003366109	24.0263789	XR_594934.1
GO:0045159	myosin II binding	molecular_function	1	139	3	10019	0.000568109	0.003366109	24.0263789	XR_594934.1
GO:0043331	response to dsRNA	biological_process	1	139	3	10019	0.000568109	0.003366109	24.0263789	XR_361445.3
GO:1900740	positive regulation of protein insertion into mitochondrial membrane involved in apoptotic signaling pathway	biological_process	1	139	3	10019	0.000568109	0.003366109	24.0263789	XR_361445.3
GO:0036128	CatSper complex	cellular_component	1	139	3	10019	0.000568109	0.003366109	24.0263789	ENSRNOT00000083554
GO:0005589	collagen type VI trimer	cellular_component	1	139	3	10019	0.000568109	0.003366109	24.0263789	ENSRNOT00000088470
GO:0007140	male meiotic nuclear division	biological_process	1	139	3	10019	0.000568109	0.003366109	24.0263789	TCONS_00000804
GO:0061304	retinal blood vessel morphogenesis	biological_process	1	139	3	10019	0.000568109	0.003366109	24.0263789	TCONS_00001104
GO:0008310	single-stranded DNA 3'-5' exodeoxyribonuclease activity	molecular_function	1	139	3	10019	0.000568109	0.003366109	24.0263789	TCONS_00003494
GO:0030620	U2 snRNA binding	molecular_function	1	139	3	10019	0.000568109	0.003366109	24.0263789	TCONS_00003494
GO:0034511	U3 snoRNA binding	molecular_function	1	139	3	10019	0.000568109	0.003366109	24.0263789	TCONS_00003494
GO:0043312	neutrophil degranulation	biological_process	1	139	3	10019	0.000568109	0.003366109	24.0263789	TCONS_00005424
GO:0043320	natural killer cell degranulation	biological_process	1	139	3	10019	0.000568109	0.003366109	24.0263789	TCONS_00005424
GO:0030277	maintenance of gastrointestinal epithelium	biological_process	1	139	3	10019	0.000568109	0.003366109	24.0263789	TCONS_00008895
GO:0004452	isopentenyl-diphosphate delta-isomerase activity	molecular_function	1	139	3	10019	0.000568109	0.003366109	24.0263789	TCONS_00016893
GO:0009240	isopentenyl diphosphate biosynthetic process	biological_process	1	139	3	10019	0.000568109	0.003366109	24.0263789	TCONS_00016893
GO:0043549	regulation of kinase activity	biological_process	1	139	3	10019	0.000568109	0.003366109	24.0263789	TCONS_00018760
GO:0003158	endothelium development	biological_process	1	139	3	10019	0.000568109	0.003366109	24.0263789	TCONS_00020289
GO:0086053	AV node cell to bundle of His cell communication by electrical coupling	biological_process	1	139	3	10019	0.000568109	0.003366109	24.0263789	TCONS_00020289
GO:0086064	cell communication by electrical coupling involved in cardiac conduction	biological_process	1	139	3	10019	0.000568109	0.003366109	24.0263789	TCONS_00020289
GO:0086077	gap junction channel activity involved in AV node cell-bundle of His cell electrical coupling	molecular_function	1	139	3	10019	0.000568109	0.003366109	24.0263789	TCONS_00020289
GO:0016471	vacuolar proton-transporting V-type ATPase complex	cellular_component	1	139	3	10019	0.000568109	0.003366109	24.0263789	TCONS_00023113
GO:0032725	positive regulation of granulocyte macrophage colony-stimulating factor production	biological_process	1	139	3	10019	0.000568109	0.003366109	24.0263789	TCONS_00030445
GO:0032727	positive regulation of interferon-alpha production	biological_process	1	139	3	10019	0.000568109	0.003366109	24.0263789	TCONS_00030445
GO:0065003	protein-containing complex assembly	biological_process	4	139	50	10019	0.000613674	0.003620135	5.766330935	XR_001838477.1; XR_359427.1; TCONS_00005424; TCONS_00010821
GO:0042612	MHC class I protein complex	cellular_component	3	139	29	10019	0.000643604	0.003780122	7.456462416	TCONS_00022311; TCONS_00022340; TCONS_00023121
GO:0000792	heterochromatin	cellular_component	2	139	13	10019	0.000675004	0.003896482	11.08909795	XR_001842563.1; ENSRNOT00000092503
GO:0030521	androgen receptor signaling pathway	biological_process	2	139	13	10019	0.000675004	0.003896482	11.08909795	XR_001842563.1; ENSRNOT00000092503
GO:0030285	integral component of synaptic vesicle membrane	cellular_component	2	139	13	10019	0.000675004	0.003896482	11.08909795	TCONS_00005424; TCONS_00023113
GO:0008236	serine-type peptidase activity	molecular_function	2	139	13	10019	0.000675004	0.003896482	11.08909795	TCONS_00025508; TCONS_00025509
GO:0042626	ATPase activity, coupled to transmembrane movement of substances	molecular_function	3	139	31	10019	0.000834527	0.004726401	6.975400325	XR_595708.2; TCONS_00021862; TCONS_00021863
GO:0019065	receptor-mediated endocytosis of virus by host cell	biological_process	2	139	14	10019	0.000850401	0.004726401	10.29701953	XR_592045.2; XR_001837541.1
GO:0060546	negative regulation of necroptotic process	biological_process	2	139	14	10019	0.000850401	0.004726401	10.29701953	XR_001837541.1; XR_001839825.1
GO:0045651	positive regulation of macrophage differentiation	biological_process	2	139	14	10019	0.000850401	0.004726401	10.29701953	XR_001839825.1; XR_359427.1
GO:0035970	peptidyl-threonine dephosphorylation	biological_process	2	139	14	10019	0.000850401	0.004726401	10.29701953	XR_001840129.1; XR_594631.2
GO:0060512	prostate gland morphogenesis	biological_process	2	139	14	10019	0.000850401	0.004726401	10.29701953	XR_001841828.1; XR_596655.2
GO:0046902	regulation of mitochondrial membrane permeability	biological_process	2	139	14	10019	0.000850401	0.004726401	10.29701953	XR_361445.3; TCONS_00024750
GO:0071168	protein localization to chromatin	biological_process	2	139	14	10019	0.000850401	0.004726401	10.29701953	XR_001842563.1; ENSRNOT00000092503
GO:1900025	negative regulation of substrate adhesion-dependent cell spreading	biological_process	2	139	14	10019	0.000850401	0.004726401	10.29701953	TCONS_00020546; TCONS_00020554
GO:0008333	endosome to lysosome transport	biological_process	3	139	32	10019	0.000943568	0.005179997	6.757419065	TCONS_00008340; TCONS_00008343; TCONS_00008344
GO:0006952	defense response	biological_process	3	139	32	10019	0.000943568	0.005179997	6.757419065	TCONS_00017460; TCONS_00017461; TCONS_00017475
GO:0006839	mitochondrial transport	biological_process	3	139	32	10019	0.000943568	0.005179997	6.757419065	TCONS_00026745; TCONS_00026759; TCONS_00026760
GO:0005777	peroxisome	cellular_component	4	139	56	10019	0.00103523	0.005660101	5.148509764	TCONS_00016893; TCONS_00019669; TCONS_00021862; TCONS_00021863
GO:0097284	hepatocyte apoptotic process	biological_process	2	139	15	10019	0.001052249	0.005714319	9.610551559	XR_001839825.1; TCONS_00024750
GO:1901216	positive regulation of neuron death	biological_process	3	139	33	10019	0.001062263	0.005714319	6.55264879	XR_001839825.1; XR_001842563.1; ENSRNOT00000092503
GO:0018963	phthalate metabolic process	biological_process	1	139	4	10019	0.00112587	0.005714319	18.01978417	XR_593920.2
GO:0002357	defense response to tumor cell	biological_process	1	139	4	10019	0.00112587	0.005714319	18.01978417	XR_001839610.1
GO:2000660	negative regulation of interleukin-1-mediated signaling pathway	biological_process	1	139	4	10019	0.00112587	0.005714319	18.01978417	XR_594354.2
GO:0009437	carnitine metabolic process	biological_process	1	139	4	10019	0.00112587	0.005714319	18.01978417	XR_594688.1
GO:0017081	chloride channel regulator activity	molecular_function	1	139	4	10019	0.00112587	0.005714319	18.01978417	XR_594934.1
GO:0051683	establishment of Golgi localization	biological_process	1	139	4	10019	0.00112587	0.005714319	18.01978417	XR_594934.1
GO:0050819	negative regulation of coagulation	biological_process	1	139	4	10019	0.00112587	0.005714319	18.01978417	XR_597429.2
GO:0030619	U1 snRNA binding	molecular_function	1	139	4	10019	0.00112587	0.005714319	18.01978417	TCONS_00003494
GO:0070032	synaptobrevin 2-SNAP-25-syntaxin-1a-complexin I complex	cellular_component	1	139	4	10019	0.00112587	0.005714319	18.01978417	TCONS_00005424
GO:0070044	synaptobrevin 2-SNAP-25-syntaxin-1a complex	cellular_component	1	139	4	10019	0.00112587	0.005714319	18.01978417	TCONS_00005424
GO:0038031	non-canonical Wnt signaling pathway via JNK cascade	biological_process	1	139	4	10019	0.00112587	0.005714319	18.01978417	TCONS_00010245
GO:0022617	extracellular matrix disassembly	biological_process	1	139	4	10019	0.00112587	0.005714319	18.01978417	TCONS_00010821
GO:0043208	glycosphingolipid binding	molecular_function	1	139	4	10019	0.00112587	0.005714319	18.01978417	TCONS_00010821
GO:0045540	regulation of cholesterol biosynthetic process	biological_process	1	139	4	10019	0.00112587	0.005714319	18.01978417	TCONS_00019669
GO:0005243	gap junction channel activity	molecular_function	1	139	4	10019	0.00112587	0.005714319	18.01978417	TCONS_00020289
GO:0060760	positive regulation of response to cytokine stimulus	biological_process	1	139	4	10019	0.00112587	0.005714319	18.01978417	TCONS_00030445
GO:0060491	regulation of cell projection assembly	biological_process	1	139	4	10019	0.00112587	0.005714319	18.01978417	TCONS_00031835
GO:0019003	GDP binding	molecular_function	4	139	58	10019	0.00121465	0.006118745	4.970974944	XR_353862.3; XR_353861.3; TCONS_00020546; TCONS_00020554
GO:0022857	transmembrane transporter activity	molecular_function	4	139	58	10019	0.00121465	0.006118745	4.970974944	XR_594688.1; TCONS_00026745; TCONS_00026759; TCONS_00026760
GO:0007191	adenylate cyclase-activating dopamine receptor signaling pathway	biological_process	2	139	16	10019	0.001281985	0.006362617	9.009892086	XR_594934.1; XR_001840518.1
GO:0010832	negative regulation of myotube differentiation	biological_process	2	139	16	10019	0.001281985	0.006362617	9.009892086	XR_001842563.1; ENSRNOT00000092503
GO:0034620	cellular response to unfolded protein	biological_process	2	139	16	10019	0.001281985	0.006362617	9.009892086	XR_001842563.1; ENSRNOT00000092503
GO:1900119	positive regulation of execution phase of apoptosis	biological_process	2	139	16	10019	0.001281985	0.006362617	9.009892086	TCONS_00025508; TCONS_00025509
GO:0032092	positive regulation of protein binding	biological_process	4	139	60	10019	0.001416101	0.007002413	4.805275779	XR_001837541.1; TCONS_00008340; TCONS_00008343; TCONS_00008344
GO:0006869	lipid transport	biological_process	3	139	36	10019	0.001480771	0.00726875	6.006594724	XR_592045.2; XR_001837541.1; TCONS_00034086
GO:0070936	protein K48-linked ubiquitination	biological_process	3	139	36	10019	0.001480771	0.00726875	6.006594724	TCONS_00008340; TCONS_00008343; TCONS_00008344
GO:0070836	caveola assembly	biological_process	2	139	17	10019	0.00154097	0.007536744	8.479898434	XR_592045.2; XR_001837541.1
GO:0043409	negative regulation of MAPK cascade	biological_process	3	139	37	10019	0.001642579	0.007975698	5.844254326	XR_001837541.1; XR_001840129.1; XR_594631.2
GO:0042531	positive regulation of tyrosine phosphorylation of STAT protein	biological_process	3	139	37	10019	0.001642579	0.007975698	5.844254326	TCONS_00008354; TCONS_00008355; TCONS_00008356
GO:0042813	Wnt-activated receptor activity	molecular_function	2	139	18	10019	0.001830496	0.008281	8.008792966	TCONS_00001104; TCONS_00010245
GO:0015485	cholesterol binding	molecular_function	2	139	18	10019	0.001830496	0.008281	8.008792966	TCONS_00015640; TCONS_00015641
GO:0043542	endothelial cell migration	biological_process	2	139	18	10019	0.001830496	0.008281	8.008792966	TCONS_00025508; TCONS_00025509
GO:1902455	negative regulation of stem cell population maintenance	biological_process	1	139	5	10019	0.001859377	0.008281	14.41582734	XR_593492.2
GO:0009635	response to herbicide	biological_process	1	139	5	10019	0.001859377	0.008281	14.41582734	XR_593920.2
GO:0010760	negative regulation of macrophage chemotaxis	biological_process	1	139	5	10019	0.001859377	0.008281	14.41582734	XR_593920.2
GO:0097720	calcineurin-mediated signaling	biological_process	1	139	5	10019	0.001859377	0.008281	14.41582734	XR_593920.2
GO:0050712	negative regulation of interleukin-1 alpha secretion	biological_process	1	139	5	10019	0.001859377	0.008281	14.41582734	XR_594354.2
GO:0097153	cysteine-type endopeptidase activity involved in apoptotic process	molecular_function	1	139	5	10019	0.001859377	0.008281	14.41582734	XR_001839825.1
GO:0097199	cysteine-type endopeptidase activity involved in apoptotic signaling pathway	molecular_function	1	139	5	10019	0.001859377	0.008281	14.41582734	XR_001839825.1
GO:0097200	cysteine-type endopeptidase activity involved in execution phase of apoptosis	molecular_function	1	139	5	10019	0.001859377	0.008281	14.41582734	XR_001839825.1
GO:0097342	ripoptosome	cellular_component	1	139	5	10019	0.001859377	0.008281	14.41582734	XR_001839825.1
GO:0015226	carnitine transmembrane transporter activity	molecular_function	1	139	5	10019	0.001859377	0.008281	14.41582734	XR_594688.1
GO:0015879	carnitine transport	biological_process	1	139	5	10019	0.001859377	0.008281	14.41582734	XR_594688.1
GO:2000146	negative regulation of cell motility	biological_process	1	139	5	10019	0.001859377	0.008281	14.41582734	XR_594934.1
GO:0008467	[heparan sulfate]-glucosamine 3-sulfotransferase 1 activity	molecular_function	1	139	5	10019	0.001859377	0.008281	14.41582734	XR_597429.2
GO:0046596	regulation of viral entry into host cell	biological_process	1	139	5	10019	0.001859377	0.008281	14.41582734	XR_597429.2
GO:0042288	MHC class I protein binding	molecular_function	1	139	5	10019	0.001859377	0.008281	14.41582734	ENSRNOT00000077381
GO:0061299	retina vasculature morphogenesis in camera-type eye	biological_process	1	139	5	10019	0.001859377	0.008281	14.41582734	TCONS_00001104
GO:0035634	response to stilbenoid	biological_process	1	139	5	10019	0.001859377	0.008281	14.41582734	TCONS_00016893
GO:0044783	G1 DNA damage checkpoint	biological_process	1	139	5	10019	0.001859377	0.008281	14.41582734	TCONS_00016901
GO:0071894	histone H2B conserved C-terminal lysine ubiquitination	biological_process	1	139	5	10019	0.001859377	0.008281	14.41582734	TCONS_00016901
GO:0060340	positive regulation of type I interferon-mediated signaling pathway	biological_process	1	139	5	10019	0.001859377	0.008281	14.41582734	TCONS_00018760
GO:0006699	bile acid biosynthetic process	biological_process	1	139	5	10019	0.001859377	0.008281	14.41582734	TCONS_00019669
GO:0003161	cardiac conduction system development	biological_process	1	139	5	10019	0.001859377	0.008281	14.41582734	TCONS_00020289
GO:0097190	apoptotic signaling pathway	biological_process	4	139	65	10019	0.002026613	0.00899602	4.435639181	XR_001837541.1; XR_001839825.1; XR_001842563.1; ENSRNOT00000092503
GO:0033116	endoplasmic reticulum-Golgi intermediate compartment membrane	cellular_component	2	139	19	10019	0.002151783	0.009489008	7.587277546	XR_353862.3; XR_353861.3
GO:0007405	neuroblast proliferation	biological_process	2	139	19	10019	0.002151783	0.009489008	7.587277546	XR_001841828.1; XR_596655.2
GO:0009615	response to virus	biological_process	4	139	66	10019	0.002168663	0.009532196	4.368432527	TCONS_00003494; TCONS_00010402; TCONS_00024750; TCONS_00030445
GO:0008203	cholesterol metabolic process	biological_process	3	139	40	10019	0.002201141	0.009643436	5.405935252	XR_001839103.1; TCONS_00015640; TCONS_00015641
GO:0043280	positive regulation of cysteine-type endopeptidase activity involved in apoptotic process	biological_process	4	139	67	10019	0.002317843	0.010121748	4.303232041	XR_001838945.1; XR_361445.3; TCONS_00013688; TCONS_00022010
GO:2001238	positive regulation of extrinsic apoptotic signaling pathway	biological_process	2	139	20	10019	0.002505984	0.010837778	7.207913669	XR_001837541.1; XR_001839825.1
GO:0060740	prostate gland epithelium morphogenesis	biological_process	2	139	20	10019	0.002505984	0.010837778	7.207913669	XR_001841828.1; XR_596655.2
GO:0016239	positive regulation of macroautophagy	biological_process	2	139	20	10019	0.002505984	0.010837778	7.207913669	ENSRNOT00000088470; TCONS_00016901
GO:0050891	multicellular organismal water homeostasis	biological_process	1	139	6	10019	0.002763717	0.011162762	12.01318945	XR_590452.1
GO:0044791	positive regulation by host of viral release from host cell	biological_process	1	139	6	10019	0.002763717	0.011162762	12.01318945	XR_592045.2
GO:0032025	response to cobalt ion	biological_process	1	139	6	10019	0.002763717	0.011162762	12.01318945	XR_001839825.1
GO:0045347	negative regulation of MHC class II biosynthetic process	biological_process	1	139	6	10019	0.002763717	0.011162762	12.01318945	XR_359427.1
GO:0051873	killing by host of symbiont cells	biological_process	1	139	6	10019	0.002763717	0.011162762	12.01318945	XR_359427.1
GO:0008532	N-acetyllactosaminide beta-1,3-N-acetylglucosaminyltransferase activity	molecular_function	1	139	6	10019	0.002763717	0.011162762	12.01318945	XR_001841218.1
GO:0030311	poly-N-acetyllactosamine biosynthetic process	biological_process	1	139	6	10019	0.002763717	0.011162762	12.01318945	XR_001841218.1
GO:0055120	striated muscle dense body	cellular_component	1	139	6	10019	0.002763717	0.011162762	12.01318945	XR_596479.2
GO:0016807	cysteine-type carboxypeptidase activity	molecular_function	1	139	6	10019	0.002763717	0.011162762	12.01318945	XR_596864.2
GO:0006477	protein sulfation	biological_process	1	139	6	10019	0.002763717	0.011162762	12.01318945	XR_597429.2
GO:0051901	positive regulation of mitochondrial depolarization	biological_process	1	139	6	10019	0.002763717	0.011162762	12.01318945	ENSRNOT00000088470
GO:0034587	piRNA metabolic process	biological_process	1	139	6	10019	0.002763717	0.011162762	12.01318945	TCONS_00000804
GO:0030947	regulation of vascular endothelial growth factor receptor signaling pathway	biological_process	1	139	6	10019	0.002763717	0.011162762	12.01318945	TCONS_00001104
GO:0150012	positive regulation of neuron projection arborization	biological_process	1	139	6	10019	0.002763717	0.011162762	12.01318945	TCONS_00001104
GO:0035493	SNARE complex assembly	biological_process	1	139	6	10019	0.002763717	0.011162762	12.01318945	TCONS_00005424
GO:0070033	synaptobrevin 2-SNAP-25-syntaxin-1a-complexin II complex	cellular_component	1	139	6	10019	0.002763717	0.011162762	12.01318945	TCONS_00005424
GO:0098967	exocytic insertion of neurotransmitter receptor to postsynaptic membrane	biological_process	1	139	6	10019	0.002763717	0.011162762	12.01318945	TCONS_00005424
GO:0005677	chromatin silencing complex	cellular_component	1	139	6	10019	0.002763717	0.011162762	12.01318945	TCONS_00007918
GO:0031581	hemidesmosome assembly	biological_process	1	139	6	10019	0.002763717	0.011162762	12.01318945	TCONS_00010821
GO:2000761	positive regulation of N-terminal peptidyl-lysine acetylation	biological_process	1	139	6	10019	0.002763717	0.011162762	12.01318945	TCONS_00016132
GO:0060371	regulation of atrial cardiac muscle cell membrane depolarization	biological_process	1	139	6	10019	0.002763717	0.011162762	12.01318945	TCONS_00020289
GO:0019752	carboxylic acid metabolic process	biological_process	1	139	6	10019	0.002763717	0.011162762	12.01318945	TCONS_00032521
GO:0016050	vesicle organization	biological_process	3	139	43	10019	0.002878593	0.011449072	5.028776978	XR_592045.2; XR_001837541.1; XR_001838416.1
GO:0002080	acrosomal membrane	cellular_component	2	139	21	10019	0.002894189	0.011449072	6.864679685	XR_592045.2; XR_001837541.1
GO:0033344	cholesterol efflux	biological_process	2	139	21	10019	0.002894189	0.011449072	6.864679685	XR_001837541.1; XR_595708.2
GO:0008138	protein tyrosine/serine/threonine phosphatase activity	molecular_function	2	139	21	10019	0.002894189	0.011449072	6.864679685	XR_001840129.1; XR_594631.2
GO:0031396	regulation of protein ubiquitination	biological_process	2	139	21	10019	0.002894189	0.011449072	6.864679685	XR_001842563.1; ENSRNOT00000092503
GO:0017147	Wnt-protein binding	molecular_function	2	139	21	10019	0.002894189	0.011449072	6.864679685	TCONS_00001104; TCONS_00010245
GO:0050860	negative regulation of T cell receptor signaling pathway	biological_process	2	139	21	10019	0.002894189	0.011449072	6.864679685	TCONS_00020546; TCONS_00020554
GO:0031625	ubiquitin protein ligase binding	molecular_function	8	139	216	10019	0.003102788	0.012238271	2.669597655	XR_001838945.1; XR_001839825.1; XR_001842563.1; ENSRNOT00000092503; TCONS_00001104; TCONS_00015640; TCONS_00015641; TCONS_00030445
GO:0030193	regulation of blood coagulation	biological_process	2	139	22	10019	0.003317421	0.013008546	6.55264879	XR_001837541.1; TCONS_00026162
GO:0008432	JUN kinase binding	molecular_function	2	139	22	10019	0.003317421	0.013008546	6.55264879	XR_001842563.1; ENSRNOT00000092503
GO:0045121	membrane raft	cellular_component	9	139	262	10019	0.00348431	0.013623248	2.476000879	XR_592045.2; XR_001837541.1; XR_001839825.1; XR_594934.1; XR_001840518.1; TCONS_00015640; TCONS_00015641; TCONS_00022311; TCONS_00022340
GO:0043407	negative regulation of MAP kinase activity	biological_process	3	139	46	10019	0.003686453	0.013788328	4.700813262	XR_001837541.1; XR_001840129.1; XR_594631.2
GO:0030507	spectrin binding	molecular_function	2	139	23	10019	0.003776643	0.013788328	6.267751017	TCONS_00020546; TCONS_00020554
GO:0055078	sodium ion homeostasis	biological_process	1	139	7	10019	0.003834078	0.013788328	10.29701953	XR_590452.1
GO:1902667	regulation of axon guidance	biological_process	1	139	7	10019	0.003834078	0.013788328	10.29701953	XR_001836574.1
GO:0005220	inositol 1,4,5-trisphosphate-sensitive calcium-release channel activity	molecular_function	1	139	7	10019	0.003834078	0.013788328	10.29701953	XR_001837812.1
GO:0030851	granulocyte differentiation	biological_process	1	139	7	10019	0.003834078	0.013788328	10.29701953	XR_593920.2
GO:0014067	negative regulation of phosphatidylinositol 3-kinase signaling	biological_process	1	139	7	10019	0.003834078	0.013788328	10.29701953	XR_594934.1
GO:0030595	leukocyte chemotaxis	biological_process	1	139	7	10019	0.003834078	0.013788328	10.29701953	XR_359427.1
GO:0045918	negative regulation of cytolysis	biological_process	1	139	7	10019	0.003834078	0.013788328	10.29701953	XR_359427.1
GO:0008378	galactosyltransferase activity	molecular_function	1	139	7	10019	0.003834078	0.013788328	10.29701953	XR_001841218.1
GO:1900747	negative regulation of vascular endothelial growth factor signaling pathway	biological_process	1	139	7	10019	0.003834078	0.013788328	10.29701953	ENSRNOT00000088470
GO:0043046	DNA methylation involved in gamete generation	biological_process	1	139	7	10019	0.003834078	0.013788328	10.29701953	TCONS_00000804
GO:0007223	Wnt signaling pathway, calcium modulating pathway	biological_process	1	139	7	10019	0.003834078	0.013788328	10.29701953	TCONS_00001104
GO:0000738	DNA catabolic process, exonucleolytic	biological_process	1	139	7	10019	0.003834078	0.013788328	10.29701953	TCONS_00003494
GO:0046826	negative regulation of protein export from nucleus	biological_process	1	139	7	10019	0.003834078	0.013788328	10.29701953	TCONS_00016132
GO:0008299	isoprenoid biosynthetic process	biological_process	1	139	7	10019	0.003834078	0.013788328	10.29701953	TCONS_00016893
GO:0000038	very long-chain fatty acid metabolic process	biological_process	1	139	7	10019	0.003834078	0.013788328	10.29701953	TCONS_00019669
GO:0016264	gap junction assembly	biological_process	1	139	7	10019	0.003834078	0.013788328	10.29701953	TCONS_00020289
GO:0061337	cardiac conduction	biological_process	1	139	7	10019	0.003834078	0.013788328	10.29701953	TCONS_00020289
GO:0050907	detection of chemical stimulus involved in sensory perception	biological_process	1	139	7	10019	0.003834078	0.013788328	10.29701953	TCONS_00022909
GO:0008553	proton-exporting ATPase activity, phosphorylative mechanism	molecular_function	1	139	7	10019	0.003834078	0.013788328	10.29701953	TCONS_00023113
GO:0019050	suppression by virus of host apoptotic process	biological_process	1	139	7	10019	0.003834078	0.013788328	10.29701953	TCONS_00024750
GO:0036018	cellular response to erythropoietin	biological_process	1	139	7	10019	0.003834078	0.013788328	10.29701953	TCONS_00024750
GO:0036466	synaptic vesicle recycling via endosome	biological_process	1	139	7	10019	0.003834078	0.013788328	10.29701953	TCONS_00024750
GO:0071839	apoptotic process in bone marrow	biological_process	1	139	7	10019	0.003834078	0.013788328	10.29701953	TCONS_00024750
GO:1904579	cellular response to thapsigargin	biological_process	1	139	7	10019	0.003834078	0.013788328	10.29701953	TCONS_00024750
GO:1905218	cellular response to astaxanthin	biological_process	1	139	7	10019	0.003834078	0.013788328	10.29701953	TCONS_00024750
GO:0000432	positive regulation of transcription from RNA polymerase II promoter by glucose	biological_process	1	139	7	10019	0.003834078	0.013788328	10.29701953	TCONS_00026162
GO:0061987	negative regulation of transcription from RNA polymerase II promoter by glucose	biological_process	1	139	7	10019	0.003834078	0.013788328	10.29701953	TCONS_00026162
GO:2000971	negative regulation of detection of glucose	biological_process	1	139	7	10019	0.003834078	0.013788328	10.29701953	TCONS_00026162
GO:0045907	positive regulation of vasoconstriction	biological_process	2	139	24	10019	0.004272757	0.015203328	6.006594724	XR_001837541.1; TCONS_00020289
GO:0021895	cerebral cortex neuron differentiation	biological_process	2	139	24	10019	0.004272757	0.015203328	6.006594724	XR_001841828.1; XR_596655.2
GO:0048712	negative regulation of astrocyte differentiation	biological_process	2	139	24	10019	0.004272757	0.015203328	6.006594724	XR_001841828.1; XR_596655.2
GO:0030295	protein kinase activator activity	molecular_function	2	139	24	10019	0.004272757	0.015203328	6.006594724	XR_001842563.1; ENSRNOT00000092503
GO:2001235	positive regulation of apoptotic signaling pathway	biological_process	3	139	48	10019	0.004302977	0.015270459	4.504946043	XR_001838945.1; XR_001842563.1; ENSRNOT00000092503
GO:0004175	endopeptidase activity	molecular_function	3	139	49	10019	0.004635823	0.016408372	4.413008369	XR_001839825.1; TCONS_00025508; TCONS_00025509
GO:0005938	cell cortex	cellular_component	5	139	113	10019	0.00480508	0.016417894	3.189342331	XR_001837541.1; XR_001837812.1; XR_001842563.1; ENSRNOT00000092503; TCONS_00031835
GO:0032420	stereocilium	cellular_component	2	139	25	10019	0.004806608	0.016417894	5.766330935	XR_001836574.1; XR_594934.1
GO:0001841	neural tube formation	biological_process	2	139	25	10019	0.004806608	0.016417894	5.766330935	XR_001839825.1; TCONS_00016132
GO:0001191	transcriptional repressor activity, RNA polymerase II transcription factor binding	molecular_function	2	139	25	10019	0.004806608	0.016417894	5.766330935	XR_001841828.1; XR_596655.2
GO:1903076	regulation of protein localization to plasma membrane	biological_process	2	139	25	10019	0.004806608	0.016417894	5.766330935	TCONS_00020546; TCONS_00020554
GO:0006633	fatty acid biosynthetic process	biological_process	2	139	25	10019	0.004806608	0.016417894	5.766330935	TCONS_00021862; TCONS_00021863
GO:0043621	protein self-association	molecular_function	3	139	50	10019	0.004985575	0.016417894	4.324748201	XR_594934.1; TCONS_00021862; TCONS_00021863
GO:0016021	integral component of membrane	cellular_component	43	139	2203	10019	0.005024039	0.016417894	1.406900989	XR_590452.1; XR_145794.4; NR_102352.1; XR_001836356.1; XR_001836574.1; XR_001836930.1; XR_001837541.1; XR_001837726.1; XR_001837812.1; XR_001839103.1; XR_594354.2; XR_594688.1; XR_001840518.1; XR_595100.2; XR_595536.2; XR_595708.2; XR_001841218.1; NR_002155.1; ENSRNOT00000077381; TCONS_00001104; TCONS_00002037; TCONS_00008895; TCONS_00009633; TCONS_00009645; TCONS_00009679; TCONS_00010402; TCONS_…
GO:0050909	sensory perception of taste	biological_process	1	139	8	10019	0.005065744	0.016417894	9.009892086	XR_590452.1
GO:0044794	positive regulation by host of viral process	biological_process	1	139	8	10019	0.005065744	0.016417894	9.009892086	XR_592045.2
GO:0003057	regulation of the force of heart contraction by chemical signal	biological_process	1	139	8	10019	0.005065744	0.016417894	9.009892086	XR_001837541.1
GO:0032507	maintenance of protein location in cell	biological_process	1	139	8	10019	0.005065744	0.016417894	9.009892086	XR_001837541.1
GO:0034098	VCP-NPL4-UFD1 AAA ATPase complex	cellular_component	1	139	8	10019	0.005065744	0.016417894	9.009892086	XR_001837541.1
GO:0044860	protein localization to plasma membrane raft	biological_process	1	139	8	10019	0.005065744	0.016417894	9.009892086	XR_001837541.1
GO:0052547	regulation of peptidase activity	biological_process	1	139	8	10019	0.005065744	0.016417894	9.009892086	XR_001837541.1
GO:0070320	inward rectifier potassium channel inhibitor activity	molecular_function	1	139	8	10019	0.005065744	0.016417894	9.009892086	XR_001837541.1
GO:1900085	negative regulation of peptidyl-tyrosine autophosphorylation	biological_process	1	139	8	10019	0.005065744	0.016417894	9.009892086	XR_001837541.1
GO:1903598	positive regulation of gap junction assembly	biological_process	1	139	8	10019	0.005065744	0.016417894	9.009892086	XR_001837541.1
GO:1903609	negative regulation of inward rectifier potassium channel activity	biological_process	1	139	8	10019	0.005065744	0.016417894	9.009892086	XR_001837541.1
GO:2001258	negative regulation of cation channel activity	biological_process	1	139	8	10019	0.005065744	0.016417894	9.009892086	XR_001837541.1
GO:0060736	prostate gland growth	biological_process	1	139	8	10019	0.005065744	0.016417894	9.009892086	XR_593920.2
GO:0097194	execution phase of apoptosis	biological_process	1	139	8	10019	0.005065744	0.016417894	9.009892086	XR_001839825.1
GO:0030033	microvillus assembly	biological_process	1	139	8	10019	0.005065744	0.016417894	9.009892086	XR_594934.1
GO:0008294	calcium- and calmodulin-responsive adenylate cyclase activity	molecular_function	1	139	8	10019	0.005065744	0.016417894	9.009892086	XR_001840518.1
GO:0030816	positive regulation of cAMP metabolic process	biological_process	1	139	8	10019	0.005065744	0.016417894	9.009892086	XR_359427.1
GO:0043517	positive regulation of DNA damage response, signal transduction by p53 class mediator	biological_process	1	139	8	10019	0.005065744	0.016417894	9.009892086	XR_361445.3
GO:0006400	tRNA modification	biological_process	1	139	8	10019	0.005065744	0.016417894	9.009892086	XR_597351.2
GO:1902259	regulation of delayed rectifier potassium channel activity	biological_process	1	139	8	10019	0.005065744	0.016417894	9.009892086	TCONS_00005424
GO:0002328	pro-B cell differentiation	biological_process	1	139	8	10019	0.005065744	0.016417894	9.009892086	TCONS_00016132
GO:0016558	protein import into peroxisome matrix	biological_process	1	139	8	10019	0.005065744	0.016417894	9.009892086	TCONS_00019669
GO:0055117	regulation of cardiac muscle contraction	biological_process	1	139	8	10019	0.005065744	0.016417894	9.009892086	TCONS_00020289
GO:0097746	regulation of blood vessel diameter	biological_process	1	139	8	10019	0.005065744	0.016417894	9.009892086	TCONS_00020289
GO:0002041	intussusceptive angiogenesis	biological_process	1	139	8	10019	0.005065744	0.016417894	9.009892086	TCONS_00022010
GO:1900452	regulation of long term synaptic depression	biological_process	1	139	8	10019	0.005065744	0.016417894	9.009892086	TCONS_00024750
GO:2000302	positive regulation of synaptic vesicle exocytosis	biological_process	1	139	8	10019	0.005065744	0.016417894	9.009892086	TCONS_00024750
GO:0005789	endoplasmic reticulum membrane	cellular_component	10	139	322	10019	0.005129319	0.016583977	2.238482506	XR_001837812.1; XR_353862.3; XR_353861.3; XR_001839103.1; TCONS_00010402; TCONS_00015640; TCONS_00015641; TCONS_00017460; TCONS_00017461; TCONS_00017475
GO:0048715	negative regulation of oligodendrocyte differentiation	biological_process	2	139	26	10019	0.005378985	0.017266669	5.544548976	XR_001841828.1; XR_596655.2
GO:0050681	androgen receptor binding	molecular_function	2	139	26	10019	0.005378985	0.017266669	5.544548976	XR_001842563.1; ENSRNOT00000092503
GO:0001890	placenta development	biological_process	2	139	26	10019	0.005378985	0.017266669	5.544548976	ENSRNOT00000088470; ENSRNOT00000085679
GO:0097110	scaffold protein binding	molecular_function	4	139	82	10019	0.005551969	0.017779519	3.516055448	XR_592045.2; XR_001837812.1; XR_001839825.1; XR_001840518.1
GO:0030659	cytoplasmic vesicle membrane	cellular_component	3	139	52	10019	0.005737309	0.018285974	4.158411732	XR_590452.1; XR_001837812.1; TCONS_00005424
GO:0030672	synaptic vesicle membrane	cellular_component	3	139	52	10019	0.005737309	0.018285974	4.158411732	XR_593347.2; TCONS_00005424; TCONS_00024750
GO:0071464	cellular response to hydrostatic pressure	biological_process	2	139	27	10019	0.00599062	0.018995108	5.33919531	XR_001838945.1; XR_593920.2
GO:0060413	atrial septum morphogenesis	biological_process	2	139	27	10019	0.00599062	0.018995108	5.33919531	TCONS_00020289; TCONS_00022010
GO:0050951	sensory perception of temperature stimulus	biological_process	1	139	9	10019	0.0064541	0.018995108	8.008792966	XR_001836356.1
GO:0007088	regulation of mitotic nuclear division	biological_process	1	139	9	10019	0.0064541	0.018995108	8.008792966	XR_592045.2
GO:0060161	positive regulation of dopamine receptor signaling pathway	biological_process	1	139	9	10019	0.0064541	0.018995108	8.008792966	XR_592045.2
GO:0051001	negative regulation of nitric-oxide synthase activity	biological_process	1	139	9	10019	0.0064541	0.018995108	8.008792966	XR_001837541.1
GO:0060355	positive regulation of cell adhesion molecule production	biological_process	1	139	9	10019	0.0064541	0.018995108	8.008792966	XR_001837541.1
GO:0098903	regulation of membrane repolarization during action potential	biological_process	1	139	9	10019	0.0064541	0.018995108	8.008792966	XR_001837541.1
GO:1903361	protein localization to basolateral plasma membrane	biological_process	1	139	9	10019	0.0064541	0.018995108	8.008792966	XR_001837541.1
GO:2000286	receptor internalization involved in canonical Wnt signaling pathway	biological_process	1	139	9	10019	0.0064541	0.018995108	8.008792966	XR_001837541.1
GO:2000535	regulation of entry of bacterium into host cell	biological_process	1	139	9	10019	0.0064541	0.018995108	8.008792966	XR_001837541.1
GO:0005671	Ada2/Gcn5/Ada3 transcription activator complex	cellular_component	1	139	9	10019	0.0064541	0.018995108	8.008792966	XR_001837617.1
GO:0008206	bile acid metabolic process	biological_process	1	139	9	10019	0.0064541	0.018995108	8.008792966	XR_593920.2
GO:1900016	negative regulation of cytokine production involved in inflammatory response	biological_process	1	139	9	10019	0.0064541	0.018995108	8.008792966	XR_594354.2
GO:0045862	positive regulation of proteolysis	biological_process	1	139	9	10019	0.0064541	0.018995108	8.008792966	XR_001839825.1
GO:0022612	gland morphogenesis	biological_process	1	139	9	10019	0.0064541	0.018995108	8.008792966	XR_594934.1
GO:0030643	cellular phosphate ion homeostasis	biological_process	1	139	9	10019	0.0064541	0.018995108	8.008792966	XR_594934.1
GO:0007195	adenylate cyclase-inhibiting dopamine receptor signaling pathway	biological_process	1	139	9	10019	0.0064541	0.018995108	8.008792966	XR_001840518.1
GO:0017127	cholesterol transporter activity	molecular_function	1	139	9	10019	0.0064541	0.018995108	8.008792966	XR_595708.2
GO:0042701	progesterone secretion	biological_process	1	139	9	10019	0.0064541	0.018995108	8.008792966	TCONS_00001104
GO:0021782	glial cell development	biological_process	1	139	9	10019	0.0064541	0.018995108	8.008792966	TCONS_00016132
GO:0016593	Cdc73/Paf1 complex	cellular_component	1	139	9	10019	0.0064541	0.018995108	8.008792966	TCONS_00019669
GO:0005922	connexin complex	cellular_component	1	139	9	10019	0.0064541	0.018995108	8.008792966	TCONS_00020289
GO:0060591	chondroblast differentiation	biological_process	1	139	9	10019	0.0064541	0.018995108	8.008792966	TCONS_00022010
GO:0046978	TAP1 binding	molecular_function	1	139	9	10019	0.0064541	0.018995108	8.008792966	TCONS_00023121
GO:0046979	TAP2 binding	molecular_function	1	139	9	10019	0.0064541	0.018995108	8.008792966	TCONS_00023121
GO:0005740	mitochondrial envelope	cellular_component	1	139	9	10019	0.0064541	0.018995108	8.008792966	TCONS_00024750
GO:0036017	response to erythropoietin	biological_process	1	139	9	10019	0.0064541	0.018995108	8.008792966	TCONS_00024750
GO:0046898	response to cycloheximide	biological_process	1	139	9	10019	0.0064541	0.018995108	8.008792966	TCONS_00024750
GO:0051434	BH3 domain binding	molecular_function	1	139	9	10019	0.0064541	0.018995108	8.008792966	TCONS_00024750
GO:0001705	ectoderm formation	biological_process	1	139	9	10019	0.0064541	0.018995108	8.008792966	TCONS_00026162
GO:0019218	regulation of steroid metabolic process	biological_process	1	139	9	10019	0.0064541	0.018995108	8.008792966	TCONS_00026162
GO:0021533	cell differentiation in hindbrain	biological_process	1	139	9	10019	0.0064541	0.018995108	8.008792966	TCONS_00026162
GO:0061448	connective tissue development	biological_process	1	139	9	10019	0.0064541	0.018995108	8.008792966	TCONS_00026162
GO:0042157	lipoprotein metabolic process	biological_process	1	139	9	10019	0.0064541	0.018995108	8.008792966	TCONS_00034086
GO:0003281	ventricular septum development	biological_process	3	139	54	10019	0.006561129	0.019225966	4.004396483	XR_592751.2; TCONS_00020289; TCONS_00022010
GO:0045177	apical part of cell	cellular_component	3	139	54	10019	0.006561129	0.019225966	4.004396483	XR_594934.1; TCONS_00025508; TCONS_00025509
GO:2000811	negative regulation of anoikis	biological_process	2	139	28	10019	0.006642196	0.019295364	5.148509764	XR_001837541.1; TCONS_00024750
GO:0001836	release of cytochrome c from mitochondria	biological_process	2	139	28	10019	0.006642196	0.019295364	5.148509764	XR_361445.3; TCONS_00024750
GO:0030433	ubiquitin-dependent ERAD pathway	biological_process	2	139	28	10019	0.006642196	0.019295364	5.148509764	TCONS_00015640; TCONS_00015641
GO:0001916	positive regulation of T cell mediated cytotoxicity	biological_process	2	139	28	10019	0.006642196	0.019295364	5.148509764	TCONS_00022311; TCONS_00022340
GO:0016048	detection of temperature stimulus	biological_process	1	139	10	10019	0.007994623	0.022079607	7.207913669	XR_001836356.1
GO:0033484	nitric oxide homeostasis	biological_process	1	139	10	10019	0.007994623	0.022079607	7.207913669	XR_001837541.1
GO:0060056	mammary gland involution	biological_process	1	139	10	10019	0.007994623	0.022079607	7.207913669	XR_001837541.1
GO:0086098	angiotensin-activated signaling pathway involved in heart process	biological_process	1	139	10	10019	0.007994623	0.022079607	7.207913669	XR_001837541.1
GO:0097422	tubular endosome	cellular_component	1	139	10	10019	0.007994623	0.022079607	7.207913669	XR_001838416.1
GO:0000983	transcription factor activity, RNA polymerase II core promoter sequence-specific DNA binding	molecular_function	1	139	10	10019	0.007994623	0.022079607	7.207913669	XR_001838477.1
GO:0007097	nuclear migration	biological_process	1	139	10	10019	0.007994623	0.022079607	7.207913669	XR_594934.1
GO:0005086	ARF guanyl-nucleotide exchange factor activity	molecular_function	1	139	10	10019	0.007994623	0.022079607	7.207913669	XR_001841711.1
GO:0010917	negative regulation of mitochondrial membrane potential	biological_process	1	139	10	10019	0.007994623	0.022079607	7.207913669	XR_361445.3
GO:0043229	intracellular organelle	cellular_component	1	139	10	10019	0.007994623	0.022079607	7.207913669	TCONS_00005424
GO:0016740	transferase activity	molecular_function	1	139	10	10019	0.007994623	0.022079607	7.207913669	TCONS_00009645
GO:0005605	basal lamina	cellular_component	1	139	10	10019	0.007994623	0.022079607	7.207913669	TCONS_00010821
GO:0003183	mitral valve morphogenesis	biological_process	1	139	10	10019	0.007994623	0.022079607	7.207913669	TCONS_00016132
GO:0003357	noradrenergic neuron differentiation	biological_process	1	139	10	10019	0.007994623	0.022079607	7.207913669	TCONS_00016132
GO:0035910	ascending aorta morphogenesis	biological_process	1	139	10	10019	0.007994623	0.022079607	7.207913669	TCONS_00016132
GO:0051400	BH domain binding	molecular_function	1	139	10	10019	0.007994623	0.022079607	7.207913669	TCONS_00024750
GO:0060154	cellular process regulating host cell cycle in response to virus	biological_process	1	139	10	10019	0.007994623	0.022079607	7.207913669	TCONS_00024750
GO:0071312	cellular response to alkaloid	biological_process	1	139	10	10019	0.007994623	0.022079607	7.207913669	TCONS_00024750
GO:0097136	Bcl-2 family protein complex	cellular_component	1	139	10	10019	0.007994623	0.022079607	7.207913669	TCONS_00024750
GO:1900118	negative regulation of execution phase of apoptosis	biological_process	1	139	10	10019	0.007994623	0.022079607	7.207913669	TCONS_00024750
GO:0033132	negative regulation of glucokinase activity	biological_process	1	139	10	10019	0.007994623	0.022079607	7.207913669	TCONS_00026162
GO:0045945	positive regulation of transcription by RNA polymerase III	biological_process	1	139	10	10019	0.007994623	0.022079607	7.207913669	TCONS_00026162
GO:0043330	response to exogenous dsRNA	biological_process	1	139	10	10019	0.007994623	0.022079607	7.207913669	TCONS_00030445
GO:1904469	positive regulation of tumor necrosis factor secretion	biological_process	1	139	10	10019	0.007994623	0.022079607	7.207913669	TCONS_00030445
GO:0051879	Hsp90 protein binding	molecular_function	2	139	30	10019	0.008067636	0.022235595	4.805275779	TCONS_00020546; TCONS_00020554
GO:0033574	response to testosterone	biological_process	3	139	58	10019	0.008436207	0.023156529	3.728231208	XR_593920.2; XR_001840129.1; XR_594631.2
GO:0045669	positive regulation of osteoblast differentiation	biological_process	3	139	58	10019	0.008436207	0.023156529	3.728231208	XR_001841828.1; XR_596655.2; TCONS_00022010
GO:0000775	chromosome, centromeric region	cellular_component	2	139	31	10019	0.008842612	0.024222633	4.650266883	XR_001842563.1; ENSRNOT00000092503
GO:0045860	positive regulation of protein kinase activity	biological_process	3	139	59	10019	0.008954294	0.024478709	3.665040849	XR_001842563.1; ENSRNOT00000092503; TCONS_00022010
GO:0045665	negative regulation of neuron differentiation	biological_process	4	139	93	10019	0.009373878	0.02543649	3.100177922	XR_001837541.1; XR_001841828.1; XR_596655.2; TCONS_00026162
GO:0048147	negative regulation of fibroblast proliferation	biological_process	3	139	60	10019	0.009492736	0.02543649	3.603956835	XR_001838945.1; XR_361445.3; TCONS_00019669
GO:0072593	reactive oxygen species metabolic process	biological_process	2	139	32	10019	0.009659754	0.02543649	4.504946043	XR_361445.3; TCONS_00022010
GO:0071276	cellular response to cadmium ion	biological_process	2	139	32	10019	0.009659754	0.02543649	4.504946043	XR_001842563.1; ENSRNOT00000092503
GO:0034446	substrate adhesion-dependent cell spreading	biological_process	2	139	32	10019	0.009659754	0.02543649	4.504946043	TCONS_00001104; TCONS_00010821
GO:0006940	regulation of smooth muscle contraction	biological_process	1	139	11	10019	0.009682887	0.02543649	6.55264879	XR_001837541.1
GO:1900027	regulation of ruffle assembly	biological_process	1	139	11	10019	0.009682887	0.02543649	6.55264879	XR_001837541.1
GO:0030540	female genitalia development	biological_process	1	139	11	10019	0.009682887	0.02543649	6.55264879	XR_593920.2
GO:0030225	macrophage differentiation	biological_process	1	139	11	10019	0.009682887	0.02543649	6.55264879	XR_001839825.1
GO:0006171	cAMP biosynthetic process	biological_process	1	139	11	10019	0.009682887	0.02543649	6.55264879	XR_001840518.1
GO:0010744	positive regulation of macrophage derived foam cell differentiation	biological_process	1	139	11	10019	0.009682887	0.02543649	6.55264879	XR_359427.1
GO:0090200	positive regulation of release of cytochrome c from mitochondria	biological_process	1	139	11	10019	0.009682887	0.02543649	6.55264879	XR_361445.3
GO:0090141	positive regulation of mitochondrial fission	biological_process	1	139	11	10019	0.009682887	0.02543649	6.55264879	ENSRNOT00000088470
GO:0090316	positive regulation of intracellular protein transport	biological_process	1	139	11	10019	0.009682887	0.02543649	6.55264879	TCONS_00005424
GO:0003211	cardiac ventricle formation	biological_process	1	139	11	10019	0.009682887	0.02543649	6.55264879	TCONS_00016132
GO:0003289	atrial septum primum morphogenesis	biological_process	1	139	11	10019	0.009682887	0.02543649	6.55264879	TCONS_00016132
GO:0071253	connexin binding	molecular_function	1	139	11	10019	0.009682887	0.02543649	6.55264879	TCONS_00020289
GO:2000304	positive regulation of ceramide biosynthetic process	biological_process	1	139	11	10019	0.009682887	0.02543649	6.55264879	TCONS_00022010
GO:0097371	MDM2/MDM4 family protein binding	molecular_function	1	139	11	10019	0.009682887	0.02543649	6.55264879	TCONS_00024750
GO:0005685	U1 snRNP	cellular_component	1	139	11	10019	0.009682887	0.02543649	6.55264879	TCONS_00028060
GO:0043065	positive regulation of apoptotic process	biological_process	9	139	307	10019	0.010326651	0.027074749	2.113069154	XR_001839825.1; XR_001840129.1; XR_594631.2; XR_361445.3; XR_001842563.1; ENSRNOT00000092503; TCONS_00016132; TCONS_00022010; TCONS_00024750
GO:0051402	neuron apoptotic process	biological_process	2	139	33	10019	0.010519503	0.027366987	4.368432527	XR_001838477.1; TCONS_00024750
GO:0021854	hypothalamus development	biological_process	2	139	33	10019	0.010519503	0.027366987	4.368432527	XR_001838945.1; XR_593920.2
GO:0019838	growth factor binding	molecular_function	2	139	33	10019	0.010519503	0.027366987	4.368432527	XR_001840129.1; XR_594631.2
GO:0009566	fertilization	biological_process	2	139	33	10019	0.010519503	0.027366987	4.368432527	TCONS_00000804; TCONS_00024750
GO:0045727	positive regulation of translation	biological_process	3	139	62	10019	0.01063188	0.027605942	3.487700162	XR_001839610.1; TCONS_00010803; TCONS_00016132
GO:0006974	cellular response to DNA damage stimulus	biological_process	6	139	175	10019	0.010911083	0.028276313	2.471284687	XR_001838945.1; XR_361445.3; TCONS_00008340; TCONS_00008343; TCONS_00008344; TCONS_00016901
GO:0045087	innate immune response	biological_process	4	139	97	10019	0.011126478	0.028573943	2.972335534	TCONS_00010402; TCONS_00018760; TCONS_00022102; TCONS_00030445
GO:0044297	cell body	cellular_component	3	139	63	10019	0.011233155	0.028573943	3.432339842	XR_001839825.1; XR_001842563.1; ENSRNOT00000092503
GO:0010977	negative regulation of neuron projection development	biological_process	3	139	63	10019	0.011233155	0.028573943	3.432339842	XR_001840518.1; TCONS_00022311; TCONS_00022340
GO:0043278	response to morphine	biological_process	2	139	34	10019	0.011422256	0.028573943	4.239949217	XR_593920.2; XR_001840518.1
GO:0031462	Cul2-RING ubiquitin ligase complex	cellular_component	1	139	12	10019	0.011514555	0.028573943	6.006594724	XR_001836574.1
GO:0001960	negative regulation of cytokine-mediated signaling pathway	biological_process	1	139	12	10019	0.011514555	0.028573943	6.006594724	XR_001837541.1
GO:0072584	caveolin-mediated endocytosis	biological_process	1	139	12	10019	0.011514555	0.028573943	6.006594724	XR_001837541.1
GO:0015278	calcium-release channel activity	molecular_function	1	139	12	10019	0.011514555	0.028573943	6.006594724	XR_001837812.1
GO:0060840	artery development	biological_process	1	139	12	10019	0.011514555	0.028573943	6.006594724	XR_592751.2
GO:0071339	MLL1 complex	cellular_component	1	139	12	10019	0.011514555	0.028573943	6.006594724	XR_001838477.1
GO:0005123	death receptor binding	molecular_function	1	139	12	10019	0.011514555	0.028573943	6.006594724	XR_001839825.1
GO:0045198	establishment of epithelial cell apical/basal polarity	biological_process	1	139	12	10019	0.011514555	0.028573943	6.006594724	XR_594934.1
GO:0070851	growth factor receptor binding	molecular_function	1	139	12	10019	0.011514555	0.028573943	6.006594724	XR_594934.1
GO:0018230	peptidyl-L-cysteine S-palmitoylation	biological_process	1	139	12	10019	0.011514555	0.028573943	6.006594724	XR_595100.2
GO:0061844	antimicrobial humoral immune response mediated by antimicrobial peptide	biological_process	1	139	12	10019	0.011514555	0.028573943	6.006594724	XR_359427.1
GO:0008376	acetylgalactosaminyltransferase activity	molecular_function	1	139	12	10019	0.011514555	0.028573943	6.006594724	XR_001841218.1
GO:1990380	Lys48-specific deubiquitinase activity	molecular_function	1	139	12	10019	0.011514555	0.028573943	6.006594724	XR_596864.2
GO:0032461	positive regulation of protein oligomerization	biological_process	1	139	12	10019	0.011514555	0.028573943	6.006594724	XR_361445.3
GO:0017156	calcium ion regulated exocytosis	biological_process	1	139	12	10019	0.011514555	0.028573943	6.006594724	TCONS_00005424
GO:0006695	cholesterol biosynthetic process	biological_process	1	139	12	10019	0.011514555	0.028573943	6.006594724	TCONS_00016893
GO:0070266	necroptotic process	biological_process	1	139	12	10019	0.011514555	0.028573943	6.006594724	TCONS_00019110
GO:0005921	gap junction	cellular_component	1	139	12	10019	0.011514555	0.028573943	6.006594724	TCONS_00020289
GO:0008321	Ral guanyl-nucleotide exchange factor activity	molecular_function	1	139	12	10019	0.011514555	0.028573943	6.006594724	TCONS_00025305
GO:0060070	canonical Wnt signaling pathway	biological_process	4	139	98	10019	0.011597282	0.028726234	2.942005579	XR_001838945.1; TCONS_00001104; TCONS_00010245; TCONS_00016132
GO:0051259	protein complex oligomerization	biological_process	3	139	64	10019	0.011855933	0.029259137	3.378709532	XR_592045.2; XR_001837541.1; TCONS_00020289
GO:0042542	response to hydrogen peroxide	biological_process	3	139	64	10019	0.011855933	0.029259137	3.378709532	XR_001840129.1; XR_594631.2; TCONS_00024750
GO:1990646	cellular response to prolactin	biological_process	2	139	35	10019	0.012368366	0.030191384	4.118807811	XR_001838945.1; TCONS_00024750
GO:0045599	negative regulation of fat cell differentiation	biological_process	2	139	35	10019	0.012368366	0.030191384	4.118807811	XR_001841828.1; XR_596655.2
GO:0019894	kinesin binding	molecular_function	2	139	35	10019	0.012368366	0.030191384	4.118807811	XR_001842563.1; ENSRNOT00000092503
GO:0040014	regulation of multicellular organism growth	biological_process	2	139	35	10019	0.012368366	0.030191384	4.118807811	XR_001842563.1; ENSRNOT00000092503
GO:0031018	endocrine pancreas development	biological_process	2	139	35	10019	0.012368366	0.030191384	4.118807811	TCONS_00016132; TCONS_00026162
GO:0071158	positive regulation of cell cycle arrest	biological_process	2	139	35	10019	0.012368366	0.030191384	4.118807811	TCONS_00025508; TCONS_00025509
GO:0034613	cellular protein localization	biological_process	3	139	65	10019	0.012500478	0.030458593	3.326729386	XR_594934.1; XR_001841828.1; XR_596655.2
GO:0060548	negative regulation of cell death	biological_process	4	139	100	10019	0.012579271	0.030595154	2.883165468	XR_001838945.1; TCONS_00016132; TCONS_00022010; TCONS_00032521
GO:0055085	transmembrane transport	biological_process	5	139	140	10019	0.013191924	0.031326148	2.574254882	XR_594688.1; XR_595708.2; TCONS_00020289; TCONS_00021862; TCONS_00021863
GO:0031526	brush border membrane	cellular_component	2	139	36	10019	0.013358147	0.031326148	4.004396483	XR_594688.1; XR_594934.1
GO:0061178	regulation of insulin secretion involved in cellular response to glucose stimulus	biological_process	2	139	36	10019	0.013358147	0.031326148	4.004396483	XR_001840518.1; TCONS_00026162
GO:0007059	chromosome segregation	biological_process	2	139	36	10019	0.013358147	0.031326148	4.004396483	XR_359962.3; TCONS_00014246
GO:0015280	ligand-gated sodium channel activity	molecular_function	1	139	13	10019	0.013485383	0.031326148	5.544548976	XR_590452.1
GO:0035313	wound healing, spreading of epidermal cells	biological_process	1	139	13	10019	0.013485383	0.031326148	5.544548976	XR_590452.1
GO:0050699	WW domain binding	molecular_function	1	139	13	10019	0.013485383	0.031326148	5.544548976	XR_590452.1
GO:0010952	positive regulation of peptidase activity	biological_process	1	139	13	10019	0.013485383	0.031326148	5.544548976	XR_001837541.1
GO:0016504	peptidase activator activity	molecular_function	1	139	13	10019	0.013485383	0.031326148	5.544548976	XR_001837541.1
GO:0048550	negative regulation of pinocytosis	biological_process	1	139	13	10019	0.013485383	0.031326148	5.544548976	XR_001837541.1
GO:1901844	regulation of cell communication by electrical coupling involved in cardiac conduction	biological_process	1	139	13	10019	0.013485383	0.031326148	5.544548976	XR_001837541.1
GO:0048016	inositol phosphate-mediated signaling	biological_process	1	139	13	10019	0.013485383	0.031326148	5.544548976	XR_001837812.1
GO:0034452	dynactin binding	molecular_function	1	139	13	10019	0.013485383	0.031326148	5.544548976	XR_001838416.1
GO:0050803	regulation of synapse structure or activity	biological_process	1	139	13	10019	0.013485383	0.031326148	5.544548976	XR_593920.2
GO:0010955	negative regulation of protein processing	biological_process	1	139	13	10019	0.013485383	0.031326148	5.544548976	XR_594354.2
GO:0015711	organic anion transport	biological_process	1	139	13	10019	0.013485383	0.031326148	5.544548976	XR_594688.1
GO:0008361	regulation of cell size	biological_process	1	139	13	10019	0.013485383	0.031326148	5.544548976	XR_594934.1
GO:0031698	beta-2 adrenergic receptor binding	molecular_function	1	139	13	10019	0.013485383	0.031326148	5.544548976	XR_594934.1
GO:0060088	auditory receptor cell stereocilium organization	biological_process	1	139	13	10019	0.013485383	0.031326148	5.544548976	XR_594934.1
GO:0001973	adenosine receptor signaling pathway	biological_process	1	139	13	10019	0.013485383	0.031326148	5.544548976	XR_001840518.1
GO:0010812	negative regulation of cell-substrate adhesion	biological_process	1	139	13	10019	0.013485383	0.031326148	5.544548976	TCONS_00001104
GO:0031987	locomotion involved in locomotory behavior	biological_process	1	139	13	10019	0.013485383	0.031326148	5.544548976	TCONS_00001104
GO:0006401	RNA catabolic process	biological_process	1	139	13	10019	0.013485383	0.031326148	5.544548976	TCONS_00003494
GO:0014009	glial cell proliferation	biological_process	1	139	13	10019	0.013485383	0.031326148	5.544548976	TCONS_00016132
GO:0086005	ventricular cardiac muscle cell action potential	biological_process	1	139	13	10019	0.013485383	0.031326148	5.544548976	TCONS_00020289
GO:0071004	U2-type prespliceosome	cellular_component	1	139	13	10019	0.013485383	0.031326148	5.544548976	TCONS_00028060
GO:0008233	peptidase activity	molecular_function	3	139	67	10019	0.013855885	0.03213132	3.227424031	XR_001839825.1; TCONS_00025508; TCONS_00025509
GO:0019933	cAMP-mediated signaling	biological_process	2	139	37	10019	0.014391874	0.033316817	3.896169551	XR_594934.1; XR_001840518.1
GO:0000149	SNARE binding	molecular_function	3	139	68	10019	0.014567231	0.03366482	3.179961913	XR_592045.2; XR_001837541.1; TCONS_00005424
GO:0019221	cytokine-mediated signaling pathway	biological_process	3	139	69	10019	0.015301312	0.034892149	3.133875508	XR_594354.2; XR_359427.1; ENSRNOT00000088470
GO:0030667	secretory granule membrane	cellular_component	2	139	38	10019	0.015469782	0.034892149	3.793638773	XR_001837812.1; TCONS_00005424
GO:0033017	sarcoplasmic reticulum membrane	cellular_component	1	139	14	10019	0.015591213	0.034892149	5.148509764	XR_001837812.1
GO:0071361	cellular response to ethanol	biological_process	1	139	14	10019	0.015591213	0.034892149	5.148509764	XR_001837812.1
GO:0016126	sterol biosynthetic process	biological_process	1	139	14	10019	0.015591213	0.034892149	5.148509764	XR_001839103.1
GO:0005164	tumor necrosis factor receptor binding	molecular_function	1	139	14	10019	0.015591213	0.034892149	5.148509764	XR_001839825.1
GO:0015695	organic cation transport	biological_process	1	139	14	10019	0.015591213	0.034892149	5.148509764	XR_594688.1
GO:0006855	drug transmembrane transport	biological_process	1	139	14	10019	0.015591213	0.034892149	5.148509764	XR_595708.2
GO:0045236	CXCR chemokine receptor binding	molecular_function	1	139	14	10019	0.015591213	0.034892149	5.148509764	XR_359427.1
GO:0015015	heparan sulfate proteoglycan biosynthetic process, enzymatic modification	biological_process	1	139	14	10019	0.015591213	0.034892149	5.148509764	XR_597429.2
GO:0035567	non-canonical Wnt signaling pathway	biological_process	1	139	14	10019	0.015591213	0.034892149	5.148509764	TCONS_00001104
GO:0003283	atrial septum development	biological_process	1	139	14	10019	0.015591213	0.034892149	5.148509764	TCONS_00020289
GO:0060307	regulation of ventricular cardiac muscle cell membrane repolarization	biological_process	1	139	14	10019	0.015591213	0.034892149	5.148509764	TCONS_00020289
GO:0003278	apoptotic process involved in heart morphogenesis	biological_process	1	139	14	10019	0.015591213	0.034892149	5.148509764	TCONS_00022010
GO:0010518	positive regulation of phospholipase activity	biological_process	1	139	14	10019	0.015591213	0.034892149	5.148509764	TCONS_00022010
GO:0032525	somite rostral/caudal axis specification	biological_process	1	139	14	10019	0.015591213	0.034892149	5.148509764	TCONS_00026162
GO:2000543	positive regulation of gastrulation	biological_process	1	139	14	10019	0.015591213	0.034892149	5.148509764	TCONS_00026162
GO:0032728	positive regulation of interferon-beta production	biological_process	1	139	14	10019	0.015591213	0.034892149	5.148509764	TCONS_00030445
GO:0032757	positive regulation of interleukin-8 production	biological_process	1	139	14	10019	0.015591213	0.034892149	5.148509764	TCONS_00030445
GO:0030512	negative regulation of transforming growth factor beta receptor signaling pathway	biological_process	3	139	70	10019	0.016058348	0.03581837	3.089105858	XR_592045.2; XR_001837541.1; XR_001838416.1
GO:0008630	intrinsic apoptotic signaling pathway in response to DNA damage	biological_process	3	139	70	10019	0.016058348	0.03581837	3.089105858	XR_001838945.1; XR_361445.3; TCONS_00024750
GO:0016787	hydrolase activity	molecular_function	2	139	39	10019	0.01659207	0.036947574	3.696365984	TCONS_00016893; TCONS_00030445
GO:0019905	syntaxin binding	molecular_function	3	139	72	10019	0.017642114	0.03855085	3.003297362	XR_592045.2; XR_001837541.1; TCONS_00005424
GO:0005764	lysosome	cellular_component	4	139	109	10019	0.017696192	0.03855085	2.645105934	XR_001838416.1; TCONS_00008340; TCONS_00008343; TCONS_00008344
GO:0016324	apical plasma membrane	cellular_component	7	139	238	10019	0.017704062	0.03855085	2.119974609	XR_590452.1; XR_001837541.1; XR_594688.1; XR_594934.1; XR_595708.2; ENSRNOT00000090331; TCONS_00008895
GO:0050840	extracellular matrix binding	molecular_function	2	139	40	10019	0.017758902	0.03855085	3.603956835	ENSRNOT00000088470; TCONS_00022010
GO:2001222	regulation of neuron migration	biological_process	1	139	15	10019	0.017827977	0.03855085	4.805275779	XR_001836574.1
GO:0010524	positive regulation of calcium ion transport into cytosol	biological_process	1	139	15	10019	0.017827977	0.03855085	4.805275779	XR_001837541.1
GO:0046785	microtubule polymerization	biological_process	1	139	15	10019	0.017827977	0.03855085	4.805275779	XR_001837541.1
GO:0071455	cellular response to hyperoxia	biological_process	1	139	15	10019	0.017827977	0.03855085	4.805275779	XR_001837541.1
GO:0070330	aromatase activity	molecular_function	1	139	15	10019	0.017827977	0.03855085	4.805275779	XR_593920.2
GO:0071371	cellular response to gonadotropin stimulus	biological_process	1	139	15	10019	0.017827977	0.03855085	4.805275779	XR_593920.2
GO:0035925	mRNA 3'-UTR AU-rich region binding	molecular_function	1	139	15	10019	0.017827977	0.03855085	4.805275779	XR_001839610.1
GO:0030168	platelet activation	biological_process	1	139	15	10019	0.017827977	0.03855085	4.805275779	XR_359427.1
GO:1902043	positive regulation of extrinsic apoptotic signaling pathway via death domain receptors	biological_process	1	139	15	10019	0.017827977	0.03855085	4.805275779	XR_361445.3
GO:0004527	exonuclease activity	molecular_function	1	139	15	10019	0.017827977	0.03855085	4.805275779	TCONS_00003494
GO:0003215	cardiac right ventricle morphogenesis	biological_process	1	139	15	10019	0.017827977	0.03855085	4.805275779	TCONS_00016132
GO:0060563	neuroepithelial cell differentiation	biological_process	1	139	15	10019	0.017827977	0.03855085	4.805275779	TCONS_00016132
GO:0006956	complement activation	biological_process	1	139	15	10019	0.017827977	0.03855085	4.805275779	TCONS_00022102
GO:0071480	cellular response to gamma radiation	biological_process	1	139	15	10019	0.017827977	0.03855085	4.805275779	TCONS_00024750
GO:0005811	lipid droplet	cellular_component	2	139	41	10019	0.018970407	0.040759102	3.516055448	XR_592045.2; XR_001837541.1
GO:0032482	Rab protein signal transduction	biological_process	2	139	41	10019	0.018970407	0.040759102	3.516055448	XR_353862.3; XR_353861.3
GO:0006334	nucleosome assembly	biological_process	2	139	41	10019	0.018970407	0.040759102	3.516055448	XR_001842563.1; ENSRNOT00000092503
GO:0034605	cellular response to heat	biological_process	2	139	41	10019	0.018970407	0.040759102	3.516055448	XR_001842563.1; ENSRNOT00000092503
GO:0042803	protein homodimerization activity	molecular_function	15	139	657	10019	0.019587382	0.041717086	1.64564239	XR_592045.2; XR_001838416.1; XR_001838477.1; XR_001842563.1; ENSRNOT00000092503; TCONS_00001104; TCONS_00008895; TCONS_00020546; TCONS_00020554; TCONS_00021862; TCONS_00021863; TCONS_00024750; TCONS_00025508; TCONS_00025509; TCONS_00038591
GO:0005743	mitochondrial inner membrane	cellular_component	4	139	112	10019	0.019668159	0.041717086	2.574254882	TCONS_00024750; TCONS_00026745; TCONS_00026759; TCONS_00026760
GO:0051604	protein maturation	biological_process	1	139	16	10019	0.02019169	0.041717086	4.504946043	XR_001836930.1
GO:0019217	regulation of fatty acid metabolic process	biological_process	1	139	16	10019	0.02019169	0.041717086	4.504946043	XR_001837541.1
GO:0034141	positive regulation of toll-like receptor 3 signaling pathway	biological_process	1	139	16	10019	0.02019169	0.041717086	4.504946043	XR_001837541.1
GO:1901380	negative regulation of potassium ion transmembrane transport	biological_process	1	139	16	10019	0.02019169	0.041717086	4.504946043	XR_001837541.1
GO:0045779	negative regulation of bone resorption	biological_process	1	139	16	10019	0.02019169	0.041717086	4.504946043	XR_593920.2
GO:0010996	response to auditory stimulus	biological_process	1	139	16	10019	0.02019169	0.041717086	4.504946043	XR_001839825.1
GO:0008514	organic anion transmembrane transporter activity	molecular_function	1	139	16	10019	0.02019169	0.041717086	4.504946043	XR_594688.1
GO:0045859	regulation of protein kinase activity	biological_process	1	139	16	10019	0.02019169	0.041717086	4.504946043	XR_594934.1
GO:0004016	adenylate cyclase activity	molecular_function	1	139	16	10019	0.02019169	0.041717086	4.504946043	XR_001840518.1
GO:0004383	guanylate cyclase activity	molecular_function	1	139	16	10019	0.02019169	0.041717086	4.504946043	XR_001840518.1
GO:0006182	cGMP biosynthetic process	biological_process	1	139	16	10019	0.02019169	0.041717086	4.504946043	XR_001840518.1
GO:0008074	guanylate cyclase complex, soluble	cellular_component	1	139	16	10019	0.02019169	0.041717086	4.504946043	XR_001840518.1
GO:0009190	cyclic nucleotide biosynthetic process	biological_process	1	139	16	10019	0.02019169	0.041717086	4.504946043	XR_001840518.1
GO:0019706	protein-cysteine S-palmitoyltransferase activity	molecular_function	1	139	16	10019	0.02019169	0.041717086	4.504946043	XR_595100.2
GO:0002690	positive regulation of leukocyte chemotaxis	biological_process	1	139	16	10019	0.02019169	0.041717086	4.504946043	XR_359427.1
GO:0031091	platelet alpha granule	cellular_component	1	139	16	10019	0.02019169	0.041717086	4.504946043	XR_359427.1
GO:0016758	transferase activity, transferring hexosyl groups	molecular_function	1	139	16	10019	0.02019169	0.041717086	4.504946043	XR_001841218.1
GO:0097193	intrinsic apoptotic signaling pathway	biological_process	1	139	16	10019	0.02019169	0.041717086	4.504946043	XR_361445.3
GO:0019800	peptide cross-linking via chondroitin 4-sulfate glycosaminoglycan	biological_process	1	139	16	10019	0.02019169	0.041717086	4.504946043	ENSRNOT00000088470
GO:0000175	3'-5'-exoribonuclease activity	molecular_function	1	139	16	10019	0.02019169	0.041717086	4.504946043	TCONS_00003494
GO:0006342	chromatin silencing	biological_process	1	139	16	10019	0.02019169	0.041717086	4.504946043	TCONS_00007918
GO:0005779	integral component of peroxisomal membrane	cellular_component	1	139	16	10019	0.02019169	0.041717086	4.504946043	TCONS_00019669
GO:0030837	negative regulation of actin filament polymerization	biological_process	1	139	16	10019	0.02019169	0.041717086	4.504946043	TCONS_00030805
GO:0002039	p53 binding	molecular_function	2	139	42	10019	0.020226681	0.041725286	3.432339842	XR_001842563.1; ENSRNOT00000092503
GO:0016055	Wnt signaling pathway	biological_process	4	139	113	10019	0.020356264	0.041928293	2.551473865	XR_001838945.1; XR_594934.1; TCONS_00001104; TCONS_00010245
GO:0006919	activation of cysteine-type endopeptidase activity involved in apoptotic process	biological_process	3	139	76	10019	0.021093736	0.043380848	2.84522908	XR_001838945.1; XR_001839825.1; XR_361445.3
GO:0032947	protein-containing complex scaffold activity	molecular_function	3	139	77	10019	0.022016825	0.045210122	2.808278053	XR_592045.2; XR_001837541.1; XR_594934.1
GO:0031748	D1 dopamine receptor binding	molecular_function	1	139	17	10019	0.022678453	0.045526148	4.239949217	XR_592045.2
GO:0045019	negative regulation of nitric oxide biosynthetic process	biological_process	1	139	17	10019	0.022678453	0.045526148	4.239949217	XR_001837541.1
GO:0004197	cysteine-type endopeptidase activity	molecular_function	1	139	17	10019	0.022678453	0.045526148	4.239949217	XR_001839825.1
GO:0005452	inorganic anion exchanger activity	molecular_function	1	139	17	10019	0.022678453	0.045526148	4.239949217	XR_594688.1
GO:0097225	sperm midpiece	cellular_component	1	139	17	10019	0.022678453	0.045526148	4.239949217	XR_594934.1
GO:0032012	regulation of ARF protein signal transduction	biological_process	1	139	17	10019	0.022678453	0.045526148	4.239949217	XR_001841711.1
GO:0009411	response to UV	biological_process	1	139	17	10019	0.022678453	0.045526148	4.239949217	XR_361445.3
GO:0031683	G-protein beta/gamma-subunit complex binding	molecular_function	1	139	17	10019	0.022678453	0.045526148	4.239949217	TCONS_00002048
GO:0005484	SNAP receptor activity	molecular_function	1	139	17	10019	0.022678453	0.045526148	4.239949217	TCONS_00005424
GO:0042589	zymogen granule membrane	cellular_component	1	139	17	10019	0.022678453	0.045526148	4.239949217	TCONS_00005424
GO:0006977	DNA damage response, signal transduction by p53 class mediator resulting in cell cycle arrest	biological_process	1	139	17	10019	0.022678453	0.045526148	4.239949217	TCONS_00016132
GO:0044319	wound healing, spreading of cells	biological_process	1	139	17	10019	0.022678453	0.045526148	4.239949217	TCONS_00022010
GO:0060710	chorio-allantoic fusion	biological_process	1	139	17	10019	0.022678453	0.045526148	4.239949217	TCONS_00022010
GO:0040007	growth	biological_process	1	139	17	10019	0.022678453	0.045526148	4.239949217	TCONS_00024750
GO:1902042	negative regulation of extrinsic apoptotic signaling pathway via death domain receptors	biological_process	1	139	17	10019	0.022678453	0.045526148	4.239949217	TCONS_00024750
GO:0005694	chromosome	cellular_component	2	139	44	10019	0.02287376	0.045781559	3.276324395	XR_359962.3; TCONS_00014246
GO:0032587	ruffle membrane	cellular_component	2	139	44	10019	0.02287376	0.045781559	3.276324395	XR_001841711.1; TCONS_00030445
GO:0000082	G1/S transition of mitotic cell cycle	biological_process	2	139	45	10019	0.024264602	0.048493149	3.203517186	XR_001841828.1; XR_596655.2
GO:0048278	vesicle docking	biological_process	1	139	18	10019	0.025284447	0.05001115	4.004396483	XR_592045.2
GO:0098911	regulation of ventricular cardiac muscle cell action potential	biological_process	1	139	18	10019	0.025284447	0.05001115	4.004396483	XR_001837541.1
GO:0043950	positive regulation of cAMP-mediated signaling	biological_process	1	139	18	10019	0.025284447	0.05001115	4.004396483	XR_359427.1
GO:0031047	gene silencing by RNA	biological_process	1	139	18	10019	0.025284447	0.05001115	4.004396483	TCONS_00000804
GO:0017022	myosin binding	molecular_function	1	139	18	10019	0.025284447	0.05001115	4.004396483	TCONS_00005424
GO:0004866	endopeptidase inhibitor activity	molecular_function	1	139	18	10019	0.025284447	0.05001115	4.004396483	TCONS_00022102
GO:2000778	positive regulation of interleukin-6 secretion	biological_process	1	139	18	10019	0.025284447	0.05001115	4.004396483	TCONS_00030445
GO:0006906	vesicle fusion	biological_process	2	139	46	10019	0.025700286	0.050684582	3.133875508	XR_592045.2; TCONS_00005424
GO:0086091	regulation of heart rate by cardiac conduction	biological_process	2	139	46	10019	0.025700286	0.050684582	3.133875508	XR_001837541.1; TCONS_00020289
GO:0071346	cellular response to interferon-gamma	biological_process	3	139	82	10019	0.027000587	0.053170994	2.637041586	XR_001838945.1; TCONS_00020546; TCONS_00020554
GO:0007005	mitochondrion organization	biological_process	2	139	47	10019	0.027180761	0.053369524	3.067197306	XR_592045.2; XR_594688.1
GO:0050830	defense response to Gram-positive bacterium	biological_process	2	139	47	10019	0.027180761	0.053369524	3.067197306	TCONS_00020546; TCONS_00020554
GO:0005637	nuclear inner membrane	cellular_component	1	139	19	10019	0.028005937	0.053581772	3.793638773	XR_592045.2
GO:0048741	skeletal muscle fiber development	biological_process	1	139	19	10019	0.028005937	0.053581772	3.793638773	XR_592045.2
GO:0060065	uterus development	biological_process	1	139	19	10019	0.028005937	0.053581772	3.793638773	XR_593920.2
GO:0006612	protein targeting to membrane	biological_process	1	139	19	10019	0.028005937	0.053581772	3.793638773	XR_595100.2
GO:0008375	acetylglucosaminyltransferase activity	molecular_function	1	139	19	10019	0.028005937	0.053581772	3.793638773	XR_001841218.1
GO:0010907	positive regulation of glucose metabolic process	biological_process	1	139	19	10019	0.028005937	0.053581772	3.793638773	XR_361445.3
GO:0017157	regulation of exocytosis	biological_process	1	139	19	10019	0.028005937	0.053581772	3.793638773	TCONS_00005424
GO:0031507	heterochromatin assembly	biological_process	1	139	19	10019	0.028005937	0.053581772	3.793638773	TCONS_00007918
GO:0003073	regulation of systemic arterial blood pressure	biological_process	1	139	19	10019	0.028005937	0.053581772	3.793638773	TCONS_00020289
GO:0005520	insulin-like growth factor binding	molecular_function	1	139	19	10019	0.028005937	0.053581772	3.793638773	TCONS_00022010
GO:0033690	positive regulation of osteoblast proliferation	biological_process	1	139	19	10019	0.028005937	0.053581772	3.793638773	TCONS_00022010
GO:0060716	labyrinthine layer blood vessel development	biological_process	1	139	19	10019	0.028005937	0.053581772	3.793638773	TCONS_00022010
GO:0007093	mitotic cell cycle checkpoint	biological_process	1	139	19	10019	0.028005937	0.053581772	3.793638773	TCONS_00024750
GO:0051881	regulation of mitochondrial membrane potential	biological_process	1	139	19	10019	0.028005937	0.053581772	3.793638773	TCONS_00024750
GO:0090201	negative regulation of release of cytochrome c from mitochondria	biological_process	1	139	19	10019	0.028005937	0.053581772	3.793638773	TCONS_00024750
GO:1900244	positive regulation of synaptic vesicle endocytosis	biological_process	1	139	19	10019	0.028005937	0.053581772	3.793638773	TCONS_00024750
GO:0040019	positive regulation of embryonic development	biological_process	1	139	19	10019	0.028005937	0.053581772	3.793638773	TCONS_00026162
GO:0060487	lung epithelial cell differentiation	biological_process	1	139	19	10019	0.028005937	0.053581772	3.793638773	TCONS_00026162
GO:0005902	microvillus	cellular_component	2	139	48	10019	0.028705947	0.054843038	3.003297362	XR_594934.1; ENSRNOT00000090331
GO:0010629	negative regulation of gene expression	biological_process	6	139	214	10019	0.029379878	0.056050973	2.020910375	XR_001838477.1; XR_001838945.1; XR_001839610.1; TCONS_00008354; TCONS_00008355; TCONS_00008356
GO:0071375	cellular response to peptide hormone stimulus	biological_process	2	139	49	10019	0.030275738	0.057596701	2.942005579	XR_001837541.1; XR_001838477.1
GO:0000281	mitotic cytokinesis	biological_process	2	139	49	10019	0.030275738	0.057596701	2.942005579	XR_001842563.1; ENSRNOT00000092503
GO:0030857	negative regulation of epithelial cell differentiation	biological_process	1	139	20	10019	0.030839265	0.058012324	3.603956835	XR_001837541.1
GO:0033137	negative regulation of peptidyl-serine phosphorylation	biological_process	1	139	20	10019	0.030839265	0.058012324	3.603956835	XR_001837541.1
GO:0034713	type I transforming growth factor beta receptor binding	molecular_function	1	139	20	10019	0.030839265	0.058012324	3.603956835	XR_001838416.1
GO:0008179	adenylate cyclase binding	molecular_function	1	139	20	10019	0.030839265	0.058012324	3.603956835	XR_001840518.1
GO:0010498	proteasomal protein catabolic process	biological_process	1	139	20	10019	0.030839265	0.058012324	3.603956835	XR_361445.3
GO:0090503	RNA phosphodiester bond hydrolysis, exonucleolytic	biological_process	1	139	20	10019	0.030839265	0.058012324	3.603956835	TCONS_00003494
GO:0042769	DNA damage response, detection of DNA damage	biological_process	1	139	20	10019	0.030839265	0.058012324	3.603956835	TCONS_00016132
GO:0006958	complement activation, classical pathway	biological_process	1	139	20	10019	0.030839265	0.058012324	3.603956835	TCONS_00022102
GO:0047485	protein N-terminus binding	molecular_function	3	139	86	10019	0.03143635	0.059052921	2.514388489	XR_001842563.1; ENSRNOT00000088470; ENSRNOT00000092503
GO:0042632	cholesterol homeostasis	biological_process	2	139	50	10019	0.031890004	0.059738238	2.883165468	XR_001837541.1; TCONS_00019669
GO:0000278	mitotic cell cycle	biological_process	2	139	50	10019	0.031890004	0.059738238	2.883165468	XR_359962.3; TCONS_00014246
GO:0016020	membrane	cellular_component	17	139	816	10019	0.032940893	0.061621003	1.501648681	XR_590452.1; XR_592045.2; XR_001837541.1; XR_001837812.1; XR_353862.3; XR_353861.3; XR_593920.2; XR_594934.1; XR_001840518.1; XR_001841218.1; XR_001841711.1; TCONS_00005424; TCONS_00009633; TCONS_00010402; TCONS_00017461; TCONS_00019669; TCONS_00024750
GO:0043392	negative regulation of DNA binding	biological_process	2	139	51	10019	0.03354859	0.061900881	2.826632811	XR_001841828.1; XR_596655.2
GO:0044877	protein-containing complex binding	molecular_function	7	139	269	10019	0.033584122	0.061900881	1.875665267	XR_001838477.1; XR_001838945.1; XR_001839825.1; XR_594934.1; TCONS_00005424; TCONS_00019110; TCONS_00024750
GO:0046982	protein heterodimerization activity	molecular_function	12	139	533	10019	0.033671512	0.061900881	1.622794822	XR_592045.2; XR_001837541.1; XR_001837617.1; XR_001838477.1; XR_001838945.1; XR_001839825.1; XR_001840518.1; XR_001842563.1; ENSRNOT00000092503; TCONS_00001104; TCONS_00016132; TCONS_00024750
GO:0061099	negative regulation of protein tyrosine kinase activity	biological_process	1	139	21	10019	0.033780852	0.061900881	3.432339842	XR_001837541.1
GO:0007512	adult heart development	biological_process	1	139	21	10019	0.033780852	0.061900881	3.432339842	XR_594688.1
GO:0048608	reproductive structure development	biological_process	1	139	21	10019	0.033780852	0.061900881	3.432339842	XR_594688.1
GO:0031528	microvillus membrane	cellular_component	1	139	21	10019	0.033780852	0.061900881	3.432339842	XR_594934.1
GO:0071108	protein K48-linked deubiquitination	biological_process	1	139	21	10019	0.033780852	0.061900881	3.432339842	XR_596864.2
GO:0015030	Cajal body	cellular_component	1	139	21	10019	0.033780852	0.061900881	3.432339842	TCONS_00003494
GO:0017075	syntaxin-1 binding	molecular_function	1	139	21	10019	0.033780852	0.061900881	3.432339842	TCONS_00005424
GO:0043001	Golgi to plasma membrane protein transport	biological_process	1	139	21	10019	0.033780852	0.061900881	3.432339842	TCONS_00005424
GO:0060993	kidney morphogenesis	biological_process	1	139	21	10019	0.033780852	0.061900881	3.432339842	TCONS_00016132
GO:0043027	cysteine-type endopeptidase inhibitor activity involved in apoptotic process	molecular_function	1	139	21	10019	0.033780852	0.061900881	3.432339842	TCONS_00024750
GO:0090009	primitive streak formation	biological_process	1	139	21	10019	0.033780852	0.061900881	3.432339842	TCONS_00026162
GO:0032755	positive regulation of interleukin-6 production	biological_process	1	139	21	10019	0.033780852	0.061900881	3.432339842	TCONS_00030445
GO:0005227	calcium activated cation channel activity	molecular_function	1	139	22	10019	0.036827196	0.06643833	3.276324395	XR_001836356.1
GO:0098655	cation transmembrane transport	biological_process	1	139	22	10019	0.036827196	0.06643833	3.276324395	XR_001836356.1
GO:0042310	vasoconstriction	biological_process	1	139	22	10019	0.036827196	0.06643833	3.276324395	XR_001837541.1
GO:0051209	release of sequestered calcium ion into cytosol	biological_process	1	139	22	10019	0.036827196	0.06643833	3.276324395	XR_001837812.1
GO:0046677	response to antibiotic	biological_process	1	139	22	10019	0.036827196	0.06643833	3.276324395	XR_001839825.1
GO:0051898	negative regulation of protein kinase B signaling	biological_process	1	139	22	10019	0.036827196	0.06643833	3.276324395	XR_594934.1
GO:0048873	homeostasis of number of cells within a tissue	biological_process	1	139	22	10019	0.036827196	0.06643833	3.276324395	XR_595536.2
GO:0043029	T cell homeostasis	biological_process	1	139	22	10019	0.036827196	0.06643833	3.276324395	XR_361445.3
GO:0061025	membrane fusion	biological_process	1	139	22	10019	0.036827196	0.06643833	3.276324395	TCONS_00005424
GO:2000809	positive regulation of synaptic vesicle clustering	biological_process	1	139	22	10019	0.036827196	0.06643833	3.276324395	TCONS_00024750
GO:0002931	response to ischemia	biological_process	2	139	53	10019	0.036998	0.06643833	2.719967422	XR_001837541.1; TCONS_00024750
GO:0030879	mammary gland development	biological_process	2	139	53	10019	0.036998	0.06643833	2.719967422	XR_001837541.1; XR_593920.2
GO:0046426	negative regulation of JAK-STAT cascade	biological_process	2	139	53	10019	0.036998	0.06643833	2.719967422	XR_001837541.1; ENSRNOT00000088470
GO:2001171	positive regulation of ATP biosynthetic process	biological_process	2	139	53	10019	0.036998	0.06643833	2.719967422	XR_001838945.1; TCONS_00024750
GO:0060412	ventricular septum morphogenesis	biological_process	2	139	53	10019	0.036998	0.06643833	2.719967422	TCONS_00016132; TCONS_00020289
GO:0009617	response to bacterium	biological_process	1	139	23	10019	0.039974867	0.070931657	3.133875508	XR_001837541.1
GO:0031295	T cell costimulation	biological_process	1	139	23	10019	0.039974867	0.070931657	3.133875508	XR_001837541.1
GO:0008209	androgen metabolic process	biological_process	1	139	23	10019	0.039974867	0.070931657	3.133875508	XR_593920.2
GO:0016712	oxidoreductase activity, acting on paired donors, with incorporation or reduction of molecular oxygen, reduced flavin or flavoprotein as one donor, and incorporation of one atom of oxygen	molecular_function	1	139	23	10019	0.039974867	0.070931657	3.133875508	XR_593920.2
GO:0008143	poly(A) binding	molecular_function	1	139	23	10019	0.039974867	0.070931657	3.133875508	XR_001839610.1
GO:0010165	response to X-ray	biological_process	1	139	23	10019	0.039974867	0.070931657	3.133875508	XR_361445.3
GO:0034260	negative regulation of GTPase activity	biological_process	1	139	23	10019	0.039974867	0.070931657	3.133875508	TCONS_00010245
GO:0070584	mitochondrion morphogenesis	biological_process	1	139	23	10019	0.039974867	0.070931657	3.133875508	TCONS_00024750
GO:1902230	negative regulation of intrinsic apoptotic signaling pathway in response to DNA damage	biological_process	1	139	23	10019	0.039974867	0.070931657	3.133875508	TCONS_00024750
GO:0051384	response to glucocorticoid	biological_process	3	139	94	10019	0.041524717	0.073584644	2.300397979	XR_001837541.1; XR_001840129.1; XR_594631.2
GO:0030674	protein binding, bridging	molecular_function	2	139	56	10019	0.042499414	0.074917053	2.574254882	XR_592045.2; XR_001837541.1
GO:0010332	response to gamma radiation	biological_process	2	139	56	10019	0.042499414	0.074917053	2.574254882	XR_001837541.1; XR_001838945.1
GO:0010243	response to organonitrogen compound	biological_process	2	139	56	10019	0.042499414	0.074917053	2.574254882	XR_001838477.1; TCONS_00024750
GO:0043507	positive regulation of JUN kinase activity	biological_process	2	139	56	10019	0.042499414	0.074917053	2.574254882	TCONS_00001104; TCONS_00010245
GO:0030165	PDZ domain binding	molecular_function	3	139	95	10019	0.042900555	0.075525192	2.276183264	XR_594688.1; XR_594934.1; TCONS_00001104
GO:0010608	posttranscriptional regulation of gene expression	biological_process	1	139	24	10019	0.043220514	0.075593746	3.003297362	XR_001837541.1
GO:0030904	retromer complex	cellular_component	1	139	24	10019	0.043220514	0.075593746	3.003297362	XR_001838416.1
GO:0008585	female gonad development	biological_process	1	139	24	10019	0.043220514	0.075593746	3.003297362	XR_593920.2
GO:0035050	embryonic heart tube development	biological_process	1	139	24	10019	0.043220514	0.075593746	3.003297362	TCONS_00020289
GO:2001243	negative regulation of intrinsic apoptotic signaling pathway	biological_process	1	139	24	10019	0.043220514	0.075593746	3.003297362	TCONS_00024750
GO:0021766	hippocampus development	biological_process	3	139	96	10019	0.044301931	0.077384542	2.252473022	XR_593920.2; XR_001841828.1; XR_596655.2
GO:0001937	negative regulation of endothelial cell proliferation	biological_process	2	139	57	10019	0.044419483	0.07748924	2.529092515	XR_592045.2; XR_001837541.1
GO:0031435	mitogen-activated protein kinase kinase kinase binding	molecular_function	1	139	25	10019	0.046560853	0.080597616	2.883165468	XR_592045.2
GO:0019915	lipid storage	biological_process	1	139	25	10019	0.046560853	0.080597616	2.883165468	XR_001837541.1
GO:0010212	response to ionizing radiation	biological_process	1	139	25	10019	0.046560853	0.080597616	2.883165468	XR_593920.2
GO:0044798	nuclear transcription factor complex	cellular_component	1	139	25	10019	0.046560853	0.080597616	2.883165468	TCONS_00016132
GO:0048844	artery morphogenesis	biological_process	1	139	25	10019	0.046560853	0.080597616	2.883165468	TCONS_00020289
GO:0032465	regulation of cytokinesis	biological_process	1	139	25	10019	0.046560853	0.080597616	2.883165468	TCONS_00024750
GO:0005178	integrin binding	molecular_function	3	139	98	10019	0.047181239	0.081566537	2.206504184	TCONS_00022010; TCONS_00025508; TCONS_00025509
GO:0031397	negative regulation of protein ubiquitination	biological_process	2	139	59	10019	0.048387274	0.083218006	2.443360566	XR_001837541.1; TCONS_00016132
GO:0005783	endoplasmic reticulum	cellular_component	12	139	565	10019	0.04982554	0.083218006	1.530884319	XR_592045.2; XR_001837541.1; XR_001837812.1; XR_001839103.1; XR_593920.2; XR_595100.2; XR_001841218.1; TCONS_00015640; TCONS_00015641; TCONS_00023121; TCONS_00024750; TCONS_00032521
GO:0002028	regulation of sodium ion transport	biological_process	1	139	26	10019	0.049992676	0.083218006	2.772274488	XR_590452.1
GO:0010656	negative regulation of muscle cell apoptotic process	biological_process	1	139	26	10019	0.049992676	0.083218006	2.772274488	XR_001837541.1
GO:0000320	re-entry into mitotic cell cycle	biological_process	1	139	26	10019	0.049992676	0.083218006	2.772274488	XR_001838945.1
GO:0002904	positive regulation of B cell apoptotic process	biological_process	1	139	26	10019	0.049992676	0.083218006	2.772274488	XR_001838945.1
GO:0006848	pyruvate transport	biological_process	1	139	26	10019	0.049992676	0.083218006	2.772274488	XR_001838945.1
GO:0009812	flavonoid metabolic process	biological_process	1	139	26	10019	0.049992676	0.083218006	2.772274488	XR_001838945.1
GO:0019087	transformation of host cell by virus	biological_process	1	139	26	10019	0.049992676	0.083218006	2.772274488	XR_001838945.1
GO:0032986	protein-DNA complex disassembly	biological_process	1	139	26	10019	0.049992676	0.083218006	2.772274488	XR_001838945.1
GO:0044195	nucleoplasmic reticulum	cellular_component	1	139	26	10019	0.049992676	0.083218006	2.772274488	XR_001838945.1
GO:0045023	G0 to G1 transition	biological_process	1	139	26	10019	0.049992676	0.083218006	2.772274488	XR_001838945.1
GO:0046722	lactic acid secretion	biological_process	1	139	26	10019	0.049992676	0.083218006	2.772274488	XR_001838945.1
GO:0071378	cellular response to growth hormone stimulus	biological_process	1	139	26	10019	0.049992676	0.083218006	2.772274488	XR_001838945.1
GO:0071966	fungal-type cell wall polysaccharide metabolic process	biological_process	1	139	26	10019	0.049992676	0.083218006	2.772274488	XR_001838945.1
GO:0090096	positive regulation of metanephric cap mesenchymal cell proliferation	biological_process	1	139	26	10019	0.049992676	0.083218006	2.772274488	XR_001838945.1
GO:1903841	cellular response to arsenite(3-)	biological_process	1	139	26	10019	0.049992676	0.083218006	2.772274488	XR_001838945.1
GO:1904586	cellular response to putrescine	biological_process	1	139	26	10019	0.049992676	0.083218006	2.772274488	XR_001838945.1
GO:1904620	cellular response to dimethyl sulfoxide	biological_process	1	139	26	10019	0.049992676	0.083218006	2.772274488	XR_001838945.1
GO:1904628	cellular response to phorbol 13-acetate 12-myristate	biological_process	1	139	26	10019	0.049992676	0.083218006	2.772274488	XR_001838945.1
GO:1990858	cellular response to lectin	biological_process	1	139	26	10019	0.049992676	0.083218006	2.772274488	XR_001838945.1
GO:1990859	cellular response to endothelin	biological_process	1	139	26	10019	0.049992676	0.083218006	2.772274488	XR_001838945.1
GO:0008266	poly(U) RNA binding	molecular_function	1	139	26	10019	0.049992676	0.083218006	2.772274488	XR_001839610.1
GO:0034612	response to tumor necrosis factor	biological_process	1	139	26	10019	0.049992676	0.083218006	2.772274488	XR_001839825.1
GO:0090023	positive regulation of neutrophil chemotaxis	biological_process	1	139	26	10019	0.049992676	0.083218006	2.772274488	XR_359427.1
GO:0060828	regulation of canonical Wnt signaling pathway	biological_process	1	139	26	10019	0.049992676	0.083218006	2.772274488	TCONS_00013688
GO:0048485	sympathetic nervous system development	biological_process	1	139	26	10019	0.049992676	0.083218006	2.772274488	TCONS_00016132
GO:0005681	spliceosomal complex	cellular_component	1	139	26	10019	0.049992676	0.083218006	2.772274488	TCONS_00016901
GO:0061036	positive regulation of cartilage development	biological_process	1	139	26	10019	0.049992676	0.083218006	2.772274488	TCONS_00022010
GO:0043014	alpha-tubulin binding	molecular_function	1	139	26	10019	0.049992676	0.083218006	2.772274488	TCONS_00031835
GO:0006888	ER to Golgi vesicle-mediated transport	biological_process	2	139	60	10019	0.050434355	0.083849452	2.40263789	XR_353862.3; XR_353861.3
GO:0001666	response to hypoxia	biological_process	5	139	192	10019	0.050848794	0.084434109	1.877060851	XR_590452.1; XR_001837541.1; XR_001837812.1; TCONS_00016132; TCONS_00024750
GO:0032870	cellular response to hormone stimulus	biological_process	2	139	61	10019	0.052523106	0.086999479	2.363250383	XR_001840129.1; XR_594631.2
GO:0016192	vesicle-mediated transport	biological_process	2	139	61	10019	0.052523106	0.086999479	2.363250383	TCONS_00005424; TCONS_00032521
GO:0032355	response to estradiol	biological_process	5	139	194	10019	0.052978694	0.087646179	1.857709709	XR_001838945.1; XR_593920.2; XR_001839825.1; XR_001840129.1; XR_594631.2
GO:0002026	regulation of the force of heart contraction	biological_process	1	139	27	10019	0.05351284	0.087667198	2.669597655	XR_001837541.1
GO:0050998	nitric-oxide synthase binding	molecular_function	1	139	27	10019	0.05351284	0.087667198	2.669597655	XR_001837541.1
GO:0070382	exocytic vesicle	cellular_component	1	139	27	10019	0.05351284	0.087667198	2.669597655	XR_001837541.1
GO:0050660	flavin adenine dinucleotide binding	molecular_function	1	139	27	10019	0.05351284	0.087667198	2.669597655	XR_001839103.1
GO:0071074	eukaryotic initiation factor eIF2 binding	molecular_function	1	139	27	10019	0.05351284	0.087667198	2.669597655	XR_001838945.1
GO:0071409	cellular response to cycloheximide	biological_process	1	139	27	10019	0.05351284	0.087667198	2.669597655	XR_001838945.1
GO:1903862	positive regulation of oxidative phosphorylation	biological_process	1	139	27	10019	0.05351284	0.087667198	2.669597655	XR_001838945.1
GO:0005201	extracellular matrix structural constituent	molecular_function	1	139	27	10019	0.05351284	0.087667198	2.669597655	TCONS_00010821
GO:0071320	cellular response to cAMP	biological_process	2	139	62	10019	0.054653168	0.089209358	2.325133442	XR_001837812.1; TCONS_00024750
GO:0044344	cellular response to fibroblast growth factor stimulus	biological_process	2	139	62	10019	0.054653168	0.089209358	2.325133442	XR_001838945.1; XR_593920.2
GO:0032526	response to retinoic acid	biological_process	2	139	62	10019	0.054653168	0.089209358	2.325133442	XR_001840129.1; XR_594631.2
GO:0045444	fat cell differentiation	biological_process	2	139	63	10019	0.056824169	0.092004885	2.288226562	XR_001841828.1; XR_596655.2
GO:0055074	calcium ion homeostasis	biological_process	1	139	28	10019	0.057118274	0.092004885	2.574254882	XR_001837541.1
GO:0016529	sarcoplasmic reticulum	cellular_component	1	139	28	10019	0.057118274	0.092004885	2.574254882	XR_001837812.1
GO:0070679	inositol 1,4,5 trisphosphate binding	molecular_function	1	139	28	10019	0.057118274	0.092004885	2.574254882	XR_001837812.1
GO:0071322	cellular response to carbohydrate stimulus	biological_process	1	139	28	10019	0.057118274	0.092004885	2.574254882	XR_001838945.1
GO:0005539	glycosaminoglycan binding	molecular_function	1	139	28	10019	0.057118274	0.092004885	2.574254882	ENSRNOT00000088470
GO:0031201	SNARE complex	cellular_component	1	139	28	10019	0.057118274	0.092004885	2.574254882	TCONS_00005424
GO:0021522	spinal cord motor neuron differentiation	biological_process	1	139	28	10019	0.057118274	0.092004885	2.574254882	TCONS_00016132
GO:0060174	limb bud formation	biological_process	1	139	28	10019	0.057118274	0.092004885	2.574254882	TCONS_00016132
GO:0006376	mRNA splice site selection	biological_process	1	139	28	10019	0.057118274	0.092004885	2.574254882	TCONS_00028060
GO:0003727	single-stranded RNA binding	molecular_function	1	139	28	10019	0.057118274	0.092004885	2.574254882	TCONS_00030445
GO:0006814	sodium ion transport	biological_process	2	139	64	10019	0.059035721	0.094640101	2.252473022	XR_590452.1; XR_594688.1
GO:0009267	cellular response to starvation	biological_process	2	139	64	10019	0.059035721	0.094640101	2.252473022	XR_001837541.1; XR_001838477.1
GO:0043085	positive regulation of catalytic activity	biological_process	2	139	64	10019	0.059035721	0.094640101	2.252473022	XR_001837541.1; XR_001838945.1
GO:0009416	response to light stimulus	biological_process	2	139	64	10019	0.059035721	0.094640101	2.252473022	XR_001840129.1; XR_594631.2
GO:0005929	cilium	cellular_component	3	139	106	10019	0.059713889	0.09561331	2.039975567	XR_001837541.1; XR_001840518.1; ENSRNOT00000083554
GO:0009405	pathogenesis	biological_process	1	139	29	10019	0.060805973	0.096671434	2.485487472	XR_001838945.1
GO:0044330	canonical Wnt signaling pathway involved in positive regulation of wound healing	biological_process	1	139	29	10019	0.060805973	0.096671434	2.485487472	XR_001838945.1
GO:1904322	cellular response to forskolin	biological_process	1	139	29	10019	0.060805973	0.096671434	2.485487472	XR_001840518.1
GO:0032154	cleavage furrow	cellular_component	1	139	29	10019	0.060805973	0.096671434	2.485487472	XR_001841711.1
GO:0033189	response to vitamin A	biological_process	1	139	29	10019	0.060805973	0.096671434	2.485487472	ENSRNOT00000090331
GO:0021904	dorsal/ventral neural tube patterning	biological_process	1	139	29	10019	0.060805973	0.096671434	2.485487472	TCONS_00026162
GO:0031410	cytoplasmic vesicle	cellular_component	5	139	202	10019	0.062037927	0.098513592	1.784137047	XR_592045.2; XR_001837541.1; TCONS_00005424; TCONS_00020546; TCONS_00020554
GO:0006338	chromatin remodeling	biological_process	3	139	108	10019	0.063098551	0.10007966	2.002198241	XR_001838945.1; XR_001842563.1; ENSRNOT00000092503
GO:0071456	cellular response to hypoxia	biological_process	4	139	155	10019	0.064407445	0.100871871	1.860106753	XR_001837812.1; XR_001838945.1; XR_361445.3; TCONS_00024750
GO:0007029	endoplasmic reticulum organization	biological_process	1	139	30	10019	0.064572997	0.100871871	2.40263789	XR_592045.2
GO:0048365	Rac GTPase binding	molecular_function	1	139	30	10019	0.064572997	0.100871871	2.40263789	XR_001837541.1
GO:0006352	DNA-templated transcription, initiation	biological_process	1	139	30	10019	0.064572997	0.100871871	2.40263789	XR_001838945.1
GO:0032873	negative regulation of stress-activated MAPK cascade	biological_process	1	139	30	10019	0.064572997	0.100871871	2.40263789	XR_001838945.1
GO:0044337	canonical Wnt signaling pathway involved in positive regulation of apoptotic process	biological_process	1	139	30	10019	0.064572997	0.100871871	2.40263789	XR_001838945.1
GO:0045656	negative regulation of monocyte differentiation	biological_process	1	139	30	10019	0.064572997	0.100871871	2.40263789	XR_001838945.1
GO:0071394	cellular response to testosterone stimulus	biological_process	1	139	30	10019	0.064572997	0.100871871	2.40263789	XR_001838945.1
GO:0030073	insulin secretion	biological_process	1	139	30	10019	0.064572997	0.100871871	2.40263789	XR_595536.2
GO:0070098	chemokine-mediated signaling pathway	biological_process	1	139	30	10019	0.064572997	0.100871871	2.40263789	XR_359427.1
GO:0051020	GTPase binding	molecular_function	1	139	30	10019	0.064572997	0.100871871	2.40263789	TCONS_00024750
GO:0097192	extrinsic apoptotic signaling pathway in absence of ligand	biological_process	1	139	30	10019	0.064572997	0.100871871	2.40263789	TCONS_00024750
GO:0071542	dopaminergic neuron differentiation	biological_process	1	139	30	10019	0.064572997	0.100871871	2.40263789	TCONS_00026162
GO:0012505	endomembrane system	cellular_component	3	139	110	10019	0.066582501	0.10389033	1.965794637	XR_353862.3; XR_353861.3; XR_594934.1
GO:0007169	transmembrane receptor protein tyrosine kinase signaling pathway	biological_process	2	139	68	10019	0.068279288	0.1055277	2.119974609	XR_001837230.1; ENSRNOT00000077381
GO:0045807	positive regulation of endocytosis	biological_process	1	139	31	10019	0.068416472	0.1055277	2.325133442	XR_001837541.1
GO:0010918	positive regulation of mitochondrial membrane potential	biological_process	1	139	31	10019	0.068416472	0.1055277	2.325133442	XR_001838945.1
GO:0035457	cellular response to interferon-alpha	biological_process	1	139	31	10019	0.068416472	0.1055277	2.325133442	XR_001838945.1
GO:0003730	mRNA 3'-UTR binding	molecular_function	1	139	31	10019	0.068416472	0.1055277	2.325133442	XR_001839610.1
GO:0015347	sodium-independent organic anion transmembrane transporter activity	molecular_function	1	139	31	10019	0.068416472	0.1055277	2.325133442	XR_594688.1
GO:0043252	sodium-independent organic anion transport	biological_process	1	139	31	10019	0.068416472	0.1055277	2.325133442	XR_594688.1
GO:0042771	intrinsic apoptotic signaling pathway in response to DNA damage by p53 class mediator	biological_process	1	139	31	10019	0.068416472	0.1055277	2.325133442	XR_361445.3
GO:0000993	RNA polymerase II core binding	molecular_function	1	139	31	10019	0.068416472	0.1055277	2.325133442	TCONS_00016901
GO:0010288	response to lead ion	biological_process	1	139	31	10019	0.068416472	0.1055277	2.325133442	TCONS_00024750
GO:0005578	proteinaceous extracellular matrix	cellular_component	4	139	158	10019	0.068735145	0.10589779	1.824788271	ENSRNOT00000088470; TCONS_00001344; TCONS_00010821; TCONS_00022010
GO:0010033	response to organic substance	biological_process	3	139	113	10019	0.071992749	0.109682834	1.913605399	XR_001839103.1; XR_001840129.1; XR_594631.2
GO:0007007	inner mitochondrial membrane organization	biological_process	1	139	32	10019	0.072333586	0.109682834	2.252473022	XR_001838945.1
GO:0032204	regulation of telomere maintenance	biological_process	1	139	32	10019	0.072333586	0.109682834	2.252473022	XR_001838945.1
GO:0044336	canonical Wnt signaling pathway involved in negative regulation of apoptotic process	biological_process	1	139	32	10019	0.072333586	0.109682834	2.252473022	XR_001838945.1
GO:0071391	cellular response to estrogen stimulus	biological_process	1	139	32	10019	0.072333586	0.109682834	2.252473022	XR_001838945.1
GO:1901857	positive regulation of cellular respiration	biological_process	1	139	32	10019	0.072333586	0.109682834	2.252473022	XR_001838945.1
GO:0045930	negative regulation of mitotic cell cycle	biological_process	1	139	32	10019	0.072333586	0.109682834	2.252473022	XR_594934.1
GO:0004860	protein kinase inhibitor activity	molecular_function	1	139	32	10019	0.072333586	0.109682834	2.252473022	ENSRNOT00000088470
GO:0001540	amyloid-beta binding	molecular_function	1	139	32	10019	0.072333586	0.109682834	2.252473022	TCONS_00001104
GO:0005834	heterotrimeric G-protein complex	cellular_component	1	139	32	10019	0.072333586	0.109682834	2.252473022	TCONS_00002048
GO:0030217	T cell differentiation	biological_process	1	139	32	10019	0.072333586	0.109682834	2.252473022	TCONS_00016132
GO:0000979	RNA polymerase II core promoter sequence-specific DNA binding	molecular_function	1	139	32	10019	0.072333586	0.109682834	2.252473022	TCONS_00018760
GO:0070207	protein homotrimerization	biological_process	1	139	32	10019	0.072333586	0.109682834	2.252473022	TCONS_00019110
GO:0001708	cell fate specification	biological_process	1	139	32	10019	0.072333586	0.109682834	2.252473022	TCONS_00026162
GO:0001938	positive regulation of endothelial cell proliferation	biological_process	2	139	70	10019	0.073133453	0.110521904	2.059403905	XR_592045.2; XR_001837541.1
GO:0007030	Golgi organization	biological_process	2	139	70	10019	0.073133453	0.110521904	2.059403905	XR_353862.3; XR_353861.3
GO:0070888	E-box binding	molecular_function	2	139	70	10019	0.073133453	0.110521904	2.059403905	XR_001838477.1; XR_001838945.1
GO:0016604	nuclear body	cellular_component	4	139	162	10019	0.074751181	0.112839886	1.77973177	XR_001838945.1; XR_001841174.1; XR_001842563.1; ENSRNOT00000092503
GO:0032091	negative regulation of protein binding	biological_process	2	139	71	10019	0.075617052	0.113891305	2.030398217	XR_001837541.1; XR_001838945.1
GO:0035091	phosphatidylinositol binding	molecular_function	2	139	71	10019	0.075617052	0.113891305	2.030398217	XR_001837812.1; XR_001838416.1
GO:0031624	ubiquitin conjugating enzyme binding	molecular_function	1	139	33	10019	0.076321592	0.113931788	2.184216263	XR_001837523.1
GO:0090398	cellular senescence	biological_process	1	139	33	10019	0.076321592	0.113931788	2.184216263	XR_001837541.1
GO:0043966	histone H3 acetylation	biological_process	1	139	33	10019	0.076321592	0.113931788	2.184216263	XR_001837617.1
GO:0044752	response to human chorionic gonadotropin	biological_process	1	139	33	10019	0.076321592	0.113931788	2.184216263	XR_001838945.1
GO:0008009	chemokine activity	molecular_function	1	139	33	10019	0.076321592	0.113931788	2.184216263	XR_359427.1
GO:0072332	intrinsic apoptotic signaling pathway by p53 class mediator	biological_process	1	139	33	10019	0.076321592	0.113931788	2.184216263	XR_361445.3
GO:0016079	synaptic vesicle exocytosis	biological_process	1	139	33	10019	0.076321592	0.113931788	2.184216263	TCONS_00005424
GO:0005793	endoplasmic reticulum-Golgi intermediate compartment	cellular_component	1	139	33	10019	0.076321592	0.113931788	2.184216263	TCONS_00032521
GO:0001934	positive regulation of protein phosphorylation	biological_process	4	139	164	10019	0.07786383	0.116105156	1.758027724	XR_001842563.1; ENSRNOT00000092503; TCONS_00010803; TCONS_00022010
GO:0071356	cellular response to tumor necrosis factor	biological_process	3	139	117	10019	0.079545397	0.118409793	1.848182992	XR_001842563.1; ENSRNOT00000092503; TCONS_00024750
GO:0004842	ubiquitin-protein transferase activity	molecular_function	5	139	216	10019	0.079976628	0.118409793	1.668498535	XR_001837523.1; TCONS_00008340; TCONS_00008343; TCONS_00008344; TCONS_00028272
GO:0051899	membrane depolarization	biological_process	1	139	34	10019	0.0803778	0.118409793	2.119974609	XR_001837541.1
GO:0007269	neurotransmitter secretion	biological_process	1	139	34	10019	0.0803778	0.118409793	2.119974609	XR_593347.2
GO:0006865	amino acid transport	biological_process	1	139	34	10019	0.0803778	0.118409793	2.119974609	XR_001838945.1
GO:0051782	negative regulation of cell division	biological_process	1	139	34	10019	0.0803778	0.118409793	2.119974609	XR_001838945.1
GO:0032435	negative regulation of proteasomal ubiquitin-dependent protein catabolic process	biological_process	1	139	34	10019	0.0803778	0.118409793	2.119974609	TCONS_00016901
GO:0003181	atrioventricular valve morphogenesis	biological_process	1	139	34	10019	0.0803778	0.118409793	2.119974609	TCONS_00022010
GO:0007281	germ cell development	biological_process	1	139	34	10019	0.0803778	0.118409793	2.119974609	TCONS_00024750
GO:0006325	chromatin organization	biological_process	1	139	34	10019	0.0803778	0.118409793	2.119974609	TCONS_00026162
GO:0045880	positive regulation of smoothened signaling pathway	biological_process	1	139	34	10019	0.0803778	0.118409793	2.119974609	TCONS_00026162
GO:0071364	cellular response to epidermal growth factor stimulus	biological_process	2	139	73	10019	0.080694922	0.118617125	1.974770868	XR_001838416.1; XR_001838945.1
GO:0000976	transcription regulatory region sequence-specific DNA binding	molecular_function	2	139	73	10019	0.080694922	0.118617125	1.974770868	TCONS_00007918; TCONS_00016132
GO:0008021	synaptic vesicle	cellular_component	3	139	119	10019	0.083464551	0.12255439	1.817121093	XR_593347.2; XR_593920.2; TCONS_00005424
GO:0006641	triglyceride metabolic process	biological_process	1	139	35	10019	0.084499584	0.122734277	2.059403905	XR_001837541.1
GO:0001783	B cell apoptotic process	biological_process	1	139	35	10019	0.084499584	0.122734277	2.059403905	XR_001838945.1
GO:0050910	detection of mechanical stimulus involved in sensory perception of sound	biological_process	1	139	35	10019	0.084499584	0.122734277	2.059403905	XR_001838945.1
GO:0008625	extrinsic apoptotic signaling pathway via death domain receptors	biological_process	1	139	35	10019	0.084499584	0.122734277	2.059403905	XR_001839825.1
GO:0015293	symporter activity	molecular_function	1	139	35	10019	0.084499584	0.122734277	2.059403905	XR_594688.1
GO:0007193	adenylate cyclase-inhibiting G-protein coupled receptor signaling pathway	biological_process	1	139	35	10019	0.084499584	0.122734277	2.059403905	XR_001840518.1
GO:0071013	catalytic step 2 spliceosome	cellular_component	1	139	35	10019	0.084499584	0.122734277	2.059403905	XR_596479.2
GO:0010508	positive regulation of autophagy	biological_process	1	139	35	10019	0.084499584	0.122734277	2.059403905	ENSRNOT00000088470
GO:0022625	cytosolic large ribosomal subunit	cellular_component	1	139	35	10019	0.084499584	0.122734277	2.059403905	ENSRNOT00000084015
GO:0010035	response to inorganic substance	biological_process	1	139	35	10019	0.084499584	0.122734277	2.059403905	TCONS_00024750
GO:0005576	extracellular region	cellular_component	6	139	273	10019	0.085446036	0.1239751	1.58415685	XR_594354.2; ENSRNOT00000088470; ENSRNOT00000085679; TCONS_00022102; TCONS_00032521; TCONS_00034086
GO:1990830	cellular response to leukemia inhibitory factor	biological_process	2	139	75	10019	0.085917113	0.12425647	1.922110312	XR_001841218.1; TCONS_00001104
GO:0001085	RNA polymerase II transcription factor binding	molecular_function	2	139	75	10019	0.085917113	0.12425647	1.922110312	XR_001841828.1; XR_596655.2
GO:0032147	activation of protein kinase activity	biological_process	2	139	75	10019	0.085917113	0.12425647	1.922110312	XR_001842563.1; ENSRNOT00000092503
GO:0051591	response to cAMP	biological_process	2	139	76	10019	0.088581088	0.127029269	1.896819387	XR_001840129.1; XR_594631.2
GO:0009925	basal plasma membrane	cellular_component	1	139	36	10019	0.088684374	0.127029269	2.002198241	XR_001837541.1
GO:0048662	negative regulation of smooth muscle cell proliferation	biological_process	1	139	36	10019	0.088684374	0.127029269	2.002198241	XR_001837541.1
GO:0048678	response to axon injury	biological_process	1	139	36	10019	0.088684374	0.127029269	2.002198241	XR_001838477.1
GO:0043279	response to alkaloid	biological_process	1	139	36	10019	0.088684374	0.127029269	2.002198241	XR_001838945.1
GO:0070059	intrinsic apoptotic signaling pathway in response to endoplasmic reticulum stress	biological_process	1	139	36	10019	0.088684374	0.127029269	2.002198241	XR_361445.3
GO:0030136	clathrin-coated vesicle	cellular_component	1	139	36	10019	0.088684374	0.127029269	2.002198241	TCONS_00005424
GO:0032024	positive regulation of insulin secretion	biological_process	1	139	36	10019	0.088684374	0.127029269	2.002198241	TCONS_00016132
GO:0010719	negative regulation of epithelial to mesenchymal transition	biological_process	1	139	36	10019	0.088684374	0.127029269	2.002198241	TCONS_00026162
GO:0007519	skeletal muscle tissue development	biological_process	2	139	77	10019	0.091279639	0.130607568	1.872185369	XR_001837541.1; ENSRNOT00000088470
GO:0002082	regulation of oxidative phosphorylation	biological_process	1	139	37	10019	0.09292966	0.131985631	1.948084775	XR_001838945.1
GO:0030325	adrenal gland development	biological_process	1	139	37	10019	0.09292966	0.131985631	1.948084775	XR_593920.2
GO:0032760	positive regulation of tumor necrosis factor production	biological_process	1	139	37	10019	0.09292966	0.131985631	1.948084775	XR_359427.1
GO:2001240	negative regulation of extrinsic apoptotic signaling pathway in absence of ligand	biological_process	1	139	37	10019	0.09292966	0.131985631	1.948084775	XR_359427.1
GO:0006493	protein O-linked glycosylation	biological_process	1	139	37	10019	0.09292966	0.131985631	1.948084775	XR_001841218.1
GO:0005518	collagen binding	molecular_function	1	139	37	10019	0.09292966	0.131985631	1.948084775	ENSRNOT00000088470
GO:0005905	clathrin-coated pit	cellular_component	1	139	37	10019	0.09292966	0.131985631	1.948084775	TCONS_00024750
GO:0004252	serine-type endopeptidase activity	molecular_function	2	139	79	10019	0.096778409	0.137228087	1.824788271	TCONS_00025508; TCONS_00025509
GO:0007595	lactation	biological_process	1	139	38	10019	0.097232987	0.137228087	1.896819387	XR_001837541.1
GO:0031090	organelle membrane	cellular_component	1	139	38	10019	0.097232987	0.137228087	1.896819387	XR_001839103.1
GO:0002181	cytoplasmic translation	biological_process	1	139	38	10019	0.097232987	0.137228087	1.896819387	ENSRNOT00000084015
GO:0001664	G-protein coupled receptor binding	molecular_function	1	139	38	10019	0.097232987	0.137228087	1.896819387	TCONS_00002048
GO:0023019	signal transduction involved in regulation of gene expression	biological_process	1	139	38	10019	0.097232987	0.137228087	1.896819387	TCONS_00026162
GO:0015031	protein transport	biological_process	4	139	177	10019	0.099762297	0.140650199	1.628907044	XR_353862.3; XR_353861.3; TCONS_00005424; TCONS_00032521
GO:0006812	cation transport	biological_process	1	139	39	10019	0.101591955	0.141891152	1.848182992	XR_001836356.1
GO:0031116	positive regulation of microtubule polymerization	biological_process	1	139	39	10019	0.101591955	0.141891152	1.848182992	XR_001837541.1
GO:2000573	positive regulation of DNA biosynthetic process	biological_process	1	139	39	10019	0.101591955	0.141891152	1.848182992	XR_001838945.1
GO:0071372	cellular response to follicle-stimulating hormone stimulus	biological_process	1	139	39	10019	0.101591955	0.141891152	1.848182992	XR_593920.2
GO:0097191	extrinsic apoptotic signaling pathway	biological_process	1	139	39	10019	0.101591955	0.141891152	1.848182992	XR_001839825.1
GO:0045776	negative regulation of blood pressure	biological_process	1	139	39	10019	0.101591955	0.141891152	1.848182992	TCONS_00020289
GO:0001558	regulation of cell growth	biological_process	1	139	39	10019	0.101591955	0.141891152	1.848182992	TCONS_00022010
GO:0050911	detection of chemical stimulus involved in sensory perception of smell	biological_process	1	139	39	10019	0.101591955	0.141891152	1.848182992	TCONS_00022909
GO:0048665	neuron fate specification	biological_process	1	139	39	10019	0.101591955	0.141891152	1.848182992	TCONS_00026162
GO:0016525	negative regulation of angiogenesis	biological_process	2	139	81	10019	0.102409249	0.142736207	1.77973177	XR_359427.1; ENSRNOT00000088470
GO:0005543	phospholipid binding	molecular_function	2	139	81	10019	0.102409249	0.142736207	1.77973177	XR_001841711.1; TCONS_00005424
GO:0005198	structural molecule activity	molecular_function	2	139	82	10019	0.105272869	0.146285955	1.758027724	XR_592045.2; XR_001837541.1
GO:0003735	structural constituent of ribosome	molecular_function	2	139	82	10019	0.105272869	0.146285955	1.758027724	XR_001842044.1; ENSRNOT00000084015
GO:0008283	cell proliferation	biological_process	5	139	233	10019	0.105282382	0.146285955	1.54676259	XR_001836930.1; XR_001838945.1; XR_001841828.1; XR_596655.2; TCONS_00024750
GO:0006935	chemotaxis	biological_process	1	139	40	10019	0.106004221	0.146682796	1.801978417	TCONS_00022010
GO:0070372	regulation of ERK1 and ERK2 cascade	biological_process	1	139	40	10019	0.106004221	0.146682796	1.801978417	TCONS_00022010
GO:0004984	olfactory receptor activity	molecular_function	1	139	40	10019	0.106004221	0.146682796	1.801978417	TCONS_00022909
GO:0098794	postsynapse	cellular_component	1	139	40	10019	0.106004221	0.146682796	1.801978417	TCONS_00024750
GO:0042470	melanosome	cellular_component	2	139	83	10019	0.108167907	0.149369441	1.736846667	XR_353862.3; XR_353861.3
GO:0001568	blood vessel development	biological_process	2	139	83	10019	0.108167907	0.149369441	1.736846667	TCONS_00001104; TCONS_00020289
GO:0031012	extracellular matrix	cellular_component	3	139	131	10019	0.108897633	0.150222888	1.650667252	ENSRNOT00000088470; TCONS_00001344; TCONS_00010821
GO:0045747	positive regulation of Notch signaling pathway	biological_process	1	139	41	10019	0.110467494	0.150688417	1.758027724	XR_001836930.1
GO:0006879	cellular iron ion homeostasis	biological_process	1	139	41	10019	0.110467494	0.150688417	1.758027724	XR_001838945.1
GO:0046325	negative regulation of glucose import	biological_process	1	139	41	10019	0.110467494	0.150688417	1.758027724	XR_001838945.1
GO:0043124	negative regulation of I-kappaB kinase/NF-kappaB signaling	biological_process	1	139	41	10019	0.110467494	0.150688417	1.758027724	XR_001839825.1
GO:0030175	filopodium	cellular_component	1	139	41	10019	0.110467494	0.150688417	1.758027724	XR_594934.1
GO:0007608	sensory perception of smell	biological_process	1	139	41	10019	0.110467494	0.150688417	1.758027724	XR_001841218.1
GO:0060291	long-term synaptic potentiation	biological_process	1	139	41	10019	0.110467494	0.150688417	1.758027724	TCONS_00005424
GO:0097718	disordered domain specific binding	molecular_function	1	139	41	10019	0.110467494	0.150688417	1.758027724	TCONS_00020289
GO:0010811	positive regulation of cell-substrate adhesion	biological_process	1	139	41	10019	0.110467494	0.150688417	1.758027724	TCONS_00022010
GO:1902600	proton transmembrane transport	biological_process	1	139	41	10019	0.110467494	0.150688417	1.758027724	TCONS_00023113
GO:0019216	regulation of lipid metabolic process	biological_process	1	139	41	10019	0.110467494	0.150688417	1.758027724	TCONS_00026162
GO:0009314	response to radiation	biological_process	2	139	84	10019	0.111093824	0.151389254	1.716169921	XR_001838945.1; TCONS_00024750
GO:0006511	ubiquitin-dependent protein catabolic process	biological_process	3	139	133	10019	0.113442483	0.15443334	1.625845189	TCONS_00008340; TCONS_00008343; TCONS_00008344
GO:0006897	endocytosis	biological_process	2	139	85	10019	0.114050075	0.155103489	1.695979687	XR_001838416.1; TCONS_00024750
GO:0051973	positive regulation of telomerase activity	biological_process	1	139	42	10019	0.114979534	0.156051941	1.716169921	XR_001838945.1
GO:0060252	positive regulation of glial cell proliferation	biological_process	1	139	42	10019	0.114979534	0.156051941	1.716169921	XR_001838945.1
GO:0009749	response to glucose	biological_process	2	139	86	10019	0.117036113	0.158683036	1.676258993	XR_595536.2; TCONS_00005424
GO:0042147	retrograde transport, endosome to Golgi	biological_process	1	139	43	10019	0.119538156	0.161586753	1.676258993	XR_001838416.1
GO:0009409	response to cold	biological_process	1	139	43	10019	0.119538156	0.161586753	1.676258993	XR_001839825.1
GO:0045111	intermediate filament cytoskeleton	cellular_component	1	139	43	10019	0.119538156	0.161586753	1.676258993	XR_001840518.1
GO:0019900	kinase binding	molecular_function	2	139	87	10019	0.12005139	0.16211759	1.656991648	XR_001837541.1; TCONS_00026162
GO:0016887	ATPase activity	molecular_function	3	139	136	10019	0.12041513	0.162445687	1.589980956	TCONS_00021862; TCONS_00021863; TCONS_00023113
GO:0042383	sarcolemma	cellular_component	3	139	137	10019	0.122779912	0.165469922	1.578375256	XR_592045.2; XR_001837541.1; XR_001840518.1
GO:0097755	positive regulation of blood vessel diameter	biological_process	1	139	44	10019	0.124141222	0.167137081	1.638162198	TCONS_00020289
GO:0042981	regulation of apoptotic process	biological_process	4	139	190	10019	0.124427937	0.167355575	1.517455509	XR_001838945.1; XR_001840129.1; XR_594631.2; TCONS_00024750
GO:0046983	protein dimerization activity	molecular_function	3	139	138	10019	0.125164608	0.168178219	1.566937754	XR_001838945.1; XR_001841828.1; XR_596655.2
GO:0005524	ATP binding	molecular_function	15	139	846	10019	0.125814347	0.168850971	1.277998877	XR_593347.2; XR_594688.1; XR_001840518.1; XR_595708.2; ENSRNOT00000088094; TCONS_00000804; TCONS_00009633; TCONS_00009645; TCONS_00009679; TCONS_00010402; TCONS_00018760; TCONS_00019110; TCONS_00021862; TCONS_00021863; TCONS_00030445
GO:0072659	protein localization to plasma membrane	biological_process	2	139	89	10019	0.126167454	0.168850971	1.619755881	XR_001836930.1; XR_594934.1
GO:0001570	vasculogenesis	biological_process	2	139	89	10019	0.126167454	0.168850971	1.619755881	XR_001837541.1; TCONS_00001104
GO:0001541	ovarian follicle development	biological_process	2	139	89	10019	0.126167454	0.168850971	1.619755881	XR_001838945.1; TCONS_00024750
GO:0006915	apoptotic process	biological_process	4	139	192	10019	0.128454951	0.170826469	1.501648681	XR_001837230.1; XR_001839825.1; XR_361445.3; TCONS_00024750
GO:0031623	receptor internalization	biological_process	1	139	45	10019	0.128786647	0.170826469	1.601758593	XR_001837541.1
GO:0030728	ovulation	biological_process	1	139	45	10019	0.128786647	0.170826469	1.601758593	XR_001838945.1
GO:0045821	positive regulation of glycolytic process	biological_process	1	139	45	10019	0.128786647	0.170826469	1.601758593	XR_001838945.1
GO:0051276	chromosome organization	biological_process	1	139	45	10019	0.128786647	0.170826469	1.601758593	XR_001838945.1
GO:2001022	positive regulation of response to DNA damage stimulus	biological_process	1	139	45	10019	0.128786647	0.170826469	1.601758593	XR_001838945.1
GO:0044306	neuron projection terminus	cellular_component	1	139	45	10019	0.128786647	0.170826469	1.601758593	TCONS_00005424
GO:0030145	manganese ion binding	molecular_function	1	139	45	10019	0.128786647	0.170826469	1.601758593	TCONS_00016893
GO:0031648	protein destabilization	biological_process	1	139	45	10019	0.128786647	0.170826469	1.601758593	TCONS_00019669
GO:0007626	locomotory behavior	biological_process	2	139	90	10019	0.129267134	0.171126275	1.601758593	XR_594688.1; XR_001840518.1
GO:0001501	skeletal system development	biological_process	2	139	90	10019	0.129267134	0.171126275	1.601758593	TCONS_00016132; TCONS_00020289
GO:0031901	early endosome membrane	cellular_component	1	139	46	10019	0.13347239	0.176346134	1.566937754	XR_001838416.1
GO:0019902	phosphatase binding	molecular_function	1	139	46	10019	0.13347239	0.176346134	1.566937754	XR_594934.1
GO:0031965	nuclear membrane	cellular_component	3	139	143	10019	0.137378805	0.181329237	1.512149721	XR_596864.2; TCONS_00014245; TCONS_00024750
GO:0030514	negative regulation of BMP signaling pathway	biological_process	1	139	47	10019	0.138196463	0.181873035	1.533598653	XR_001837541.1
GO:0031398	positive regulation of protein ubiquitination	biological_process	1	139	47	10019	0.138196463	0.181873035	1.533598653	XR_001837541.1
GO:0008344	adult locomotory behavior	biological_process	1	139	47	10019	0.138196463	0.181873035	1.533598653	TCONS_00026162
GO:0071407	cellular response to organic cyclic compound	biological_process	2	139	93	10019	0.1387261	0.182391598	1.550088961	XR_001838945.1; XR_001839825.1
GO:0061630	ubiquitin protein ligase activity	molecular_function	3	139	144	10019	0.139878155	0.183726678	1.501648681	XR_001837523.1; TCONS_00019669; TCONS_00028272
GO:0009967	positive regulation of signal transduction	biological_process	1	139	48	10019	0.14295692	0.186676755	1.501648681	XR_001837541.1
GO:0019898	extrinsic component of membrane	cellular_component	1	139	48	10019	0.14295692	0.186676755	1.501648681	XR_001838416.1
GO:0000987	proximal promoter sequence-specific DNA binding	molecular_function	1	139	48	10019	0.14295692	0.186676755	1.501648681	XR_001838945.1
GO:1904385	cellular response to angiotensin	biological_process	1	139	48	10019	0.14295692	0.186676755	1.501648681	XR_001838945.1
GO:1903955	positive regulation of protein targeting to mitochondrion	biological_process	1	139	48	10019	0.14295692	0.186676755	1.501648681	TCONS_00000804
GO:0030513	positive regulation of BMP signaling pathway	biological_process	1	139	48	10019	0.14295692	0.186676755	1.501648681	TCONS_00022010
GO:0051262	protein tetramerization	biological_process	1	139	49	10019	0.147751864	0.192006045	1.47100279	XR_001836356.1
GO:0008104	protein localization	biological_process	1	139	49	10019	0.147751864	0.192006045	1.47100279	XR_001837541.1
GO:0009953	dorsal/ventral pattern formation	biological_process	1	139	49	10019	0.147751864	0.192006045	1.47100279	TCONS_00026162
GO:0048646	anatomical structure formation involved in morphogenesis	biological_process	1	139	49	10019	0.147751864	0.192006045	1.47100279	TCONS_00026162
GO:0008289	lipid binding	molecular_function	1	139	49	10019	0.147751864	0.192006045	1.47100279	TCONS_00034086
GO:0090263	positive regulation of canonical Wnt signaling pathway	biological_process	2	139	96	10019	0.148413259	0.192123035	1.501648681	XR_001837541.1; TCONS_00016132
GO:0035690	cellular response to drug	biological_process	2	139	96	10019	0.148413259	0.192123035	1.501648681	XR_001838945.1; TCONS_00024750
GO:0031982	vesicle	cellular_component	2	139	96	10019	0.148413259	0.192123035	1.501648681	XR_359427.1; TCONS_00005424
GO:0051726	regulation of cell cycle	biological_process	2	139	96	10019	0.148413259	0.192123035	1.501648681	XR_001841828.1; XR_596655.2
GO:0032436	positive regulation of proteasomal ubiquitin-dependent protein catabolic process	biological_process	1	139	50	10019	0.152579441	0.196758723	1.441582734	XR_001837523.1
GO:0005719	nuclear euchromatin	cellular_component	1	139	50	10019	0.152579441	0.196758723	1.441582734	XR_001838945.1
GO:0060348	bone development	biological_process	1	139	50	10019	0.152579441	0.196758723	1.441582734	XR_593920.2
GO:0010596	negative regulation of endothelial cell migration	biological_process	1	139	50	10019	0.152579441	0.196758723	1.441582734	ENSRNOT00000088470
GO:0000139	Golgi membrane	cellular_component	5	139	261	10019	0.154870865	0.199485652	1.380826373	XR_592045.2; XR_001837541.1; XR_353862.3; XR_353861.3; XR_001841218.1
GO:0005635	nuclear envelope	cellular_component	2	139	98	10019	0.154990711	0.199485652	1.47100279	XR_592045.2; XR_001838945.1
GO:0048863	stem cell differentiation	biological_process	1	139	51	10019	0.157437843	0.20186263	1.413316406	XR_001837230.1
GO:0036120	cellular response to platelet-derived growth factor stimulus	biological_process	1	139	51	10019	0.157437843	0.20186263	1.413316406	XR_001838945.1
GO:0031016	pancreas development	biological_process	1	139	51	10019	0.157437843	0.20186263	1.413316406	XR_595536.2
GO:0001046	core promoter sequence-specific DNA binding	molecular_function	1	139	51	10019	0.157437843	0.20186263	1.413316406	TCONS_00016132
GO:0006816	calcium ion transport	biological_process	2	139	99	10019	0.158313573	0.202792149	1.456144176	XR_001837541.1; XR_001837812.1
GO:0035335	peptidyl-tyrosine dephosphorylation	biological_process	2	139	100	10019	0.161658454	0.206553958	1.441582734	XR_001840129.1; XR_594631.2
GO:0005102	signaling receptor binding	molecular_function	6	139	323	10019	0.161960103	0.206553958	1.338931332	XR_001837541.1; XR_594934.1; TCONS_00022094; TCONS_00022311; TCONS_00022340; TCONS_00023121
GO:0005739	mitochondrion	cellular_component	10	139	566	10019	0.162226972	0.206553958	1.27348298	XR_001837541.1; XR_001838945.1; XR_361445.3; TCONS_00016132; TCONS_00021862; TCONS_00021863; TCONS_00024750; TCONS_00026745; TCONS_00026759; TCONS_00026760
GO:0003697	single-stranded DNA binding	molecular_function	1	139	52	10019	0.162325304	0.206553958	1.386137244	XR_590817.2
GO:0051219	phosphoprotein binding	molecular_function	1	139	52	10019	0.162325304	0.206553958	1.386137244	XR_592045.2
GO:0051480	regulation of cytosolic calcium ion concentration	biological_process	1	139	52	10019	0.162325304	0.206553958	1.386137244	XR_001837541.1
GO:0021510	spinal cord development	biological_process	1	139	52	10019	0.162325304	0.206553958	1.386137244	TCONS_00016132
GO:0010628	positive regulation of gene expression	biological_process	7	139	384	10019	0.16444619	0.208918396	1.313942596	XR_001837541.1; XR_001838945.1; XR_001839610.1; XR_359427.1; XR_001841828.1; XR_596655.2; TCONS_00030445
GO:0005829	cytosol	cellular_component	33	139	2081	10019	0.164494112	0.208918396	1.143013701	XR_349835.3; XR_592045.2; XR_001837541.1; XR_001838416.1; XR_593920.2; XR_001839825.1; XR_359722.3; XR_359962.3; XR_361445.3; XR_001842563.1; XR_597351.2; ENSRNOT00000092503; TCONS_00008340; TCONS_00008343; TCONS_00008344; TCONS_00008354; TCONS_00008355; TCONS_00008356; TCONS_00008895; TCONS_00009633; TCONS_00010402; TCONS_00010803; TCONS_00014246; TCONS_00015640; TCONS_00015641; TCONS_00018760; …
GO:0014070	response to organic cyclic compound	biological_process	4	139	209	10019	0.164981863	0.209340194	1.379505008	XR_593920.2; TCONS_00021862; TCONS_00021863; TCONS_00024750
GO:0006886	intracellular protein transport	biological_process	3	139	154	10019	0.165836688	0.210028574	1.404139026	XR_353862.3; XR_353861.3; XR_001838416.1
GO:0003690	double-stranded DNA binding	molecular_function	3	139	154	10019	0.165836688	0.210028574	1.404139026	XR_001838945.1; TCONS_00026162; TCONS_00030445
GO:0014704	intercalated disc	cellular_component	1	139	53	10019	0.1672401	0.211606712	1.359983711	TCONS_00020289
GO:0043627	response to estrogen	biological_process	2	139	102	10019	0.168412058	0.212689406	1.413316406	XR_001837541.1; XR_593920.2
GO:0004725	protein tyrosine phosphatase activity	molecular_function	2	139	102	10019	0.168412058	0.212689406	1.413316406	XR_001840129.1; XR_594631.2
GO:0006486	protein glycosylation	biological_process	1	139	54	10019	0.17218055	0.216635024	1.334798828	XR_001841218.1
GO:0007188	adenylate cyclase-modulating G-protein coupled receptor signaling pathway	biological_process	1	139	54	10019	0.17218055	0.216635024	1.334798828	TCONS_00002048
GO:0032956	regulation of actin cytoskeleton organization	biological_process	1	139	54	10019	0.17218055	0.216635024	1.334798828	TCONS_00010245
GO:0031647	regulation of protein stability	biological_process	1	139	54	10019	0.17218055	0.216635024	1.334798828	TCONS_00016132
GO:0003713	transcription coactivator activity	molecular_function	3	139	158	10019	0.176676315	0.221020447	1.368591203	XR_359722.3; XR_001842563.1; ENSRNOT00000092503
GO:0035725	sodium ion transmembrane transport	biological_process	1	139	55	10019	0.177145013	0.221020447	1.310529758	XR_590452.1
GO:0031100	animal organ regeneration	biological_process	1	139	55	10019	0.177145013	0.221020447	1.310529758	XR_001837541.1
GO:0032570	response to progesterone	biological_process	1	139	55	10019	0.177145013	0.221020447	1.310529758	XR_001837541.1
GO:0042149	cellular response to glucose starvation	biological_process	1	139	55	10019	0.177145013	0.221020447	1.310529758	XR_361445.3
GO:0043525	positive regulation of neuron apoptotic process	biological_process	1	139	55	10019	0.177145013	0.221020447	1.310529758	XR_361445.3
GO:0032088	negative regulation of NF-kappaB transcription factor activity	biological_process	1	139	55	10019	0.177145013	0.221020447	1.310529758	TCONS_00018760
GO:0009653	anatomical structure morphogenesis	biological_process	1	139	55	10019	0.177145013	0.221020447	1.310529758	TCONS_00026162
GO:0002244	hematopoietic progenitor cell differentiation	biological_process	1	139	55	10019	0.177145013	0.221020447	1.310529758	TCONS_00028272
GO:0032496	response to lipopolysaccharide	biological_process	4	139	216	10019	0.181119443	0.225658583	1.334798828	XR_001839825.1; XR_359427.1; ENSRNOT00000088470; TCONS_00024750
GO:0008134	transcription factor binding	molecular_function	7	139	394	10019	0.18119797	0.225658583	1.280593799	XR_001838945.1; XR_001841828.1; XR_596655.2; XR_001842563.1; ENSRNOT00000092503; TCONS_00024750; TCONS_00026162
GO:0043388	positive regulation of DNA binding	biological_process	1	139	56	10019	0.182131887	0.226018642	1.287127441	XR_001838945.1
GO:0070491	repressing transcription factor binding	molecular_function	1	139	56	10019	0.182131887	0.226018642	1.287127441	XR_001838945.1
GO:0005759	mitochondrial matrix	cellular_component	1	139	56	10019	0.182131887	0.226018642	1.287127441	TCONS_00024750
GO:0071260	cellular response to mechanical stimulus	biological_process	2	139	106	10019	0.182159263	0.226018642	1.359983711	XR_001837541.1; XR_001839825.1
GO:0090090	negative regulation of canonical Wnt signaling pathway	biological_process	4	139	217	10019	0.18347228	0.227437987	1.328647681	XR_349835.3; XR_001837541.1; XR_001839610.1; XR_594934.1
GO:0008201	heparin binding	molecular_function	2	139	107	10019	0.185642883	0.22991683	1.347273583	XR_359427.1; TCONS_00022010
GO:0006887	exocytosis	biological_process	1	139	57	10019	0.187139611	0.231344463	1.264546258	TCONS_00005424
GO:0030177	positive regulation of Wnt signaling pathway	biological_process	1	139	57	10019	0.187139611	0.231344463	1.264546258	TCONS_00016132
GO:0032868	response to insulin	biological_process	2	139	108	10019	0.189144149	0.233179543	1.334798828	XR_001838477.1; TCONS_00026162
GO:0003729	mRNA binding	molecular_function	2	139	108	10019	0.189144149	0.233179543	1.334798828	XR_001838945.1; TCONS_00028060
GO:0000287	magnesium ion binding	molecular_function	2	139	108	10019	0.189144149	0.233179543	1.334798828	ENSRNOT00000088094; TCONS_00016893
GO:0030971	receptor tyrosine kinase binding	molecular_function	1	139	58	10019	0.192166661	0.23560999	1.242743736	XR_001837230.1
GO:0030133	transport vesicle	cellular_component	1	139	58	10019	0.192166661	0.23560999	1.242743736	XR_592045.2
GO:0048306	calcium-dependent protein binding	molecular_function	1	139	58	10019	0.192166661	0.23560999	1.242743736	TCONS_00005424
GO:0010951	negative regulation of endopeptidase activity	biological_process	1	139	58	10019	0.192166661	0.23560999	1.242743736	TCONS_00022102
GO:0005741	mitochondrial outer membrane	cellular_component	1	139	58	10019	0.192166661	0.23560999	1.242743736	TCONS_00024750
GO:0001205	transcriptional activator activity, RNA polymerase II distal enhancer sequence-specific DNA binding	molecular_function	1	139	58	10019	0.192166661	0.23560999	1.242743736	TCONS_00026162
GO:0051260	protein homooligomerization	biological_process	3	139	164	10019	0.193373167	0.236873324	1.318520793	XR_001837541.1; TCONS_00020546; TCONS_00020554
GO:0005901	caveola	cellular_component	2	139	110	10019	0.19619748	0.239611144	1.310529758	XR_592045.2; XR_001837541.1
GO:0002020	protease binding	molecular_function	2	139	110	10019	0.19619748	0.239611144	1.310529758	TCONS_00025508; TCONS_00025509
GO:0005769	early endosome	cellular_component	3	139	165	10019	0.196203652	0.239611144	1.310529758	TCONS_00008340; TCONS_00008343; TCONS_00008344
GO:0032993	protein-DNA complex	cellular_component	1	139	59	10019	0.197211552	0.239611144	1.221680283	XR_001838477.1
GO:0001105	RNA polymerase II transcription coactivator activity	molecular_function	1	139	59	10019	0.197211552	0.239611144	1.221680283	TCONS_00016132
GO:0030276	clathrin binding	molecular_function	1	139	59	10019	0.197211552	0.239611144	1.221680283	TCONS_00024750
GO:0034097	response to cytokine	biological_process	1	139	59	10019	0.197211552	0.239611144	1.221680283	TCONS_00024750
GO:0051602	response to electrical stimulus	biological_process	1	139	59	10019	0.197211552	0.239611144	1.221680283	TCONS_00024750
GO:0098793	presynapse	cellular_component	1	139	59	10019	0.197211552	0.239611144	1.221680283	TCONS_00024750
GO:0030027	lamellipodium	cellular_component	2	139	111	10019	0.199748481	0.242474465	1.298723184	TCONS_00025508; TCONS_00025509
GO:0019901	protein kinase binding	molecular_function	7	139	405	10019	0.200457439	0.243115649	1.245812239	XR_001837230.1; XR_592045.2; XR_001837541.1; XR_001842563.1; ENSRNOT00000092503; TCONS_00019110; TCONS_00024750
GO:0010468	regulation of gene expression	biological_process	5	139	284	10019	0.202025899	0.24377864	1.268998885	XR_001837230.1; XR_591875.2; XR_001838945.1; XR_001841174.1; TCONS_00026162
GO:0031234	extrinsic component of cytoplasmic side of plasma membrane	cellular_component	1	139	60	10019	0.202272834	0.24377864	1.201318945	XR_592045.2
GO:0034644	cellular response to UV	biological_process	1	139	60	10019	0.202272834	0.24377864	1.201318945	XR_001838945.1
GO:0043473	pigmentation	biological_process	1	139	60	10019	0.202272834	0.24377864	1.201318945	XR_001838945.1
GO:0050885	neuromuscular process controlling balance	biological_process	1	139	60	10019	0.202272834	0.24377864	1.201318945	XR_001840518.1
GO:0000785	chromatin	cellular_component	1	139	60	10019	0.202272834	0.24377864	1.201318945	TCONS_00007918
GO:0000922	spindle pole	cellular_component	1	139	60	10019	0.202272834	0.24377864	1.201318945	TCONS_00031835
GO:0043195	terminal bouton	cellular_component	2	139	112	10019	0.203315001	0.244596312	1.287127441	XR_593920.2; TCONS_00005424
GO:0007605	sensory perception of sound	biological_process	2	139	112	10019	0.203315001	0.244596312	1.287127441	XR_594934.1; TCONS_00001104
GO:0042474	middle ear morphogenesis	biological_process	1	139	61	10019	0.207349096	0.249226572	1.181625192	XR_001838945.1
GO:0070371	ERK1 and ERK2 cascade	biological_process	1	139	62	10019	0.21243896	0.254888851	1.162566721	XR_001838945.1
GO:0043679	axon terminus	cellular_component	1	139	62	10019	0.21243896	0.254888851	1.162566721	XR_593920.2
GO:0006813	potassium ion transport	biological_process	1	139	63	10019	0.217541085	0.26077786	1.144113281	TCONS_00020289
GO:0071944	cell periphery	cellular_component	1	139	64	10019	0.222654161	0.266669498	1.126236511	XR_594934.1
GO:0044325	ion channel binding	molecular_function	2	139	118	10019	0.225010934	0.268970858	1.221680283	XR_001837541.1; TCONS_00005424
GO:0003705	transcription factor activity, RNA polymerase II distal enhancer sequence-specific binding	molecular_function	2	139	118	10019	0.225010934	0.268970858	1.221680283	TCONS_00013688; TCONS_00026162
GO:0001078	transcriptional repressor activity, RNA polymerase II proximal promoter sequence-specific DNA binding	molecular_function	3	139	175	10019	0.225175603	0.268970858	1.235642343	XR_591875.2; XR_001838477.1; TCONS_00038591
GO:0000151	ubiquitin ligase complex	cellular_component	1	139	65	10019	0.227776914	0.270875287	1.108909795	XR_001837523.1
GO:0038023	signaling receptor activity	molecular_function	1	139	65	10019	0.227776914	0.270875287	1.108909795	TCONS_00001104
GO:0043154	negative regulation of cysteine-type endopeptidase activity involved in apoptotic process	biological_process	1	139	65	10019	0.227776914	0.270875287	1.108909795	TCONS_00024750
GO:0071230	cellular response to amino acid stimulus	biological_process	1	139	65	10019	0.227776914	0.270875287	1.108909795	TCONS_00024750
GO:0043433	negative regulation of DNA binding transcription factor activity	biological_process	1	139	65	10019	0.227776914	0.270875287	1.108909795	TCONS_00026162
GO:0071347	cellular response to interleukin-1	biological_process	2	139	120	10019	0.232343727	0.275515742	1.201318945	XR_001838945.1; TCONS_00024750
GO:0071333	cellular response to glucose stimulus	biological_process	2	139	120	10019	0.232343727	0.275515742	1.201318945	XR_593920.2; TCONS_00016132
GO:0003714	transcription corepressor activity	molecular_function	2	139	120	10019	0.232343727	0.275515742	1.201318945	XR_001842563.1; ENSRNOT00000092503
GO:0033138	positive regulation of peptidyl-serine phosphorylation	biological_process	1	139	66	10019	0.232908103	0.275515742	1.092108132	XR_001837541.1
GO:0001726	ruffle	cellular_component	1	139	66	10019	0.232908103	0.275515742	1.092108132	XR_594934.1
GO:0007264	small GTPase mediated signal transduction	biological_process	1	139	66	10019	0.232908103	0.275515742	1.092108132	TCONS_00025305
GO:0043235	receptor complex	cellular_component	2	139	121	10019	0.236026771	0.278959585	1.191390689	XR_001837812.1; XR_595708.2
GO:0009986	cell surface	cellular_component	8	139	488	10019	0.236422929	0.279182476	1.181625192	XR_590452.1; XR_592045.2; XR_001837541.1; TCONS_00001104; TCONS_00010245; TCONS_00023121; TCONS_00025508; TCONS_00025509
GO:0009897	external side of plasma membrane	cellular_component	3	139	179	10019	0.237067099	0.279697586	1.208030224	XR_590452.1; TCONS_00022311; TCONS_00022340
GO:0005819	spindle	cellular_component	1	139	67	10019	0.238046518	0.279871124	1.07580801	XR_001838945.1
GO:0035019	somatic stem cell population maintenance	biological_process	1	139	67	10019	0.238046518	0.279871124	1.07580801	TCONS_00016132
GO:0031966	mitochondrial membrane	cellular_component	1	139	67	10019	0.238046518	0.279871124	1.07580801	TCONS_00024750
GO:0060441	epithelial tube branching involved in lung morphogenesis	biological_process	1	139	67	10019	0.238046518	0.279871124	1.07580801	TCONS_00026162
GO:0005261	cation channel activity	molecular_function	1	139	68	10019	0.243190979	0.28442771	1.059987304	XR_001836356.1
GO:0043123	positive regulation of I-kappaB kinase/NF-kappaB signaling	biological_process	1	139	68	10019	0.243190979	0.28442771	1.059987304	XR_001839825.1
GO:0007189	adenylate cyclase-activating G-protein coupled receptor signaling pathway	biological_process	1	139	68	10019	0.243190979	0.28442771	1.059987304	XR_001840518.1
GO:0006412	translation	biological_process	1	139	68	10019	0.243190979	0.28442771	1.059987304	XR_001842044.1
GO:0001933	negative regulation of protein phosphorylation	biological_process	1	139	68	10019	0.243190979	0.28442771	1.059987304	TCONS_00010803
GO:0045597	positive regulation of cell differentiation	biological_process	1	139	68	10019	0.243190979	0.28442771	1.059987304	TCONS_00022010
GO:0005874	microtubule	cellular_component	3	139	182	10019	0.246083631	0.287560802	1.188117638	XR_001842563.1; ENSRNOT00000092503; TCONS_00031835
GO:0006470	protein dephosphorylation	biological_process	2	139	124	10019	0.247136628	0.288540594	1.162566721	XR_001840129.1; XR_594631.2
GO:0097421	liver regeneration	biological_process	1	139	69	10019	0.24834034	0.289192864	1.044625169	XR_001838945.1
GO:0030198	extracellular matrix organization	biological_process	1	139	69	10019	0.24834034	0.289192864	1.044625169	TCONS_00022010
GO:0046332	SMAD binding	molecular_function	1	139	69	10019	0.24834034	0.289192864	1.044625169	TCONS_00026162
GO:0001227	transcriptional repressor activity, RNA polymerase II transcription regulatory region sequence-specific DNA binding	molecular_function	1	139	70	10019	0.253493484	0.29442896	1.029701953	XR_001838477.1
GO:0020037	heme binding	molecular_function	1	139	70	10019	0.253493484	0.29442896	1.029701953	XR_593920.2
GO:0003151	outflow tract morphogenesis	biological_process	1	139	70	10019	0.253493484	0.29442896	1.029701953	TCONS_00020289
GO:0033613	activating transcription factor binding	molecular_function	1	139	71	10019	0.258649323	0.299641119	1.015199108	XR_001838945.1
GO:0005604	basement membrane	cellular_component	1	139	71	10019	0.258649323	0.299641119	1.015199108	TCONS_00010821
GO:0048468	cell development	biological_process	1	139	71	10019	0.258649323	0.299641119	1.015199108	TCONS_00026162
GO:0008584	male gonad development	biological_process	2	139	128	10019	0.262073608	0.303346818	1.126236511	XR_593920.2; TCONS_00024750
GO:0032991	protein-containing complex	cellular_component	8	139	503	10019	0.263614167	0.304190372	1.14638786	XR_592045.2; XR_001837541.1; XR_001838945.1; XR_001839825.1; XR_359427.1; TCONS_00008340; TCONS_00008343; TCONS_00008344
GO:0090575	RNA polymerase II transcription factor complex	cellular_component	1	139	72	10019	0.263806798	0.304190372	1.001099121	XR_001838477.1
GO:0014911	positive regulation of smooth muscle cell migration	biological_process	1	139	72	10019	0.263806798	0.304190372	1.001099121	XR_001838945.1
GO:0071549	cellular response to dexamethasone stimulus	biological_process	1	139	72	10019	0.263806798	0.304190372	1.001099121	TCONS_00024750
GO:0007155	cell adhesion	biological_process	4	139	249	10019	0.263933207	0.304190372	1.157897778	XR_001836930.1; TCONS_00001344; TCONS_00010821; TCONS_00022010
GO:0001658	branching involved in ureteric bud morphogenesis	biological_process	1	139	73	10019	0.268964879	0.309459163	0.987385434	XR_001838945.1
GO:0030326	embryonic limb morphogenesis	biological_process	1	139	73	10019	0.268964879	0.309459163	0.987385434	TCONS_00020289
GO:0007507	heart development	biological_process	4	139	251	10019	0.269231329	0.309500972	1.148671501	XR_001839825.1; XR_001840518.1; TCONS_00016132; TCONS_00020289
GO:0009612	response to mechanical stimulus	biological_process	2	139	131	10019	0.273352917	0.313516027	1.100444835	XR_001837541.1; ENSRNOT00000088470
GO:0070062	extracellular exosome	cellular_component	1	139	74	10019	0.274122563	0.313516027	0.974042388	XR_590452.1
GO:0006874	cellular calcium ion homeostasis	biological_process	1	139	74	10019	0.274122563	0.313516027	0.974042388	XR_001837541.1
GO:0035914	skeletal muscle cell differentiation	biological_process	1	139	74	10019	0.274122563	0.313516027	0.974042388	XR_001838945.1
GO:0045787	positive regulation of cell cycle	biological_process	1	139	74	10019	0.274122563	0.313516027	0.974042388	XR_001838945.1
GO:0048705	skeletal system morphogenesis	biological_process	1	139	74	10019	0.274122563	0.313516027	0.974042388	XR_001838945.1
GO:0005737	cytoplasm	cellular_component	46	139	3123	10019	0.276844329	0.316359917	1.06168437	XR_349835.3; XR_590817.2; XR_001837523.1; XR_592045.2; XR_001837541.1; XR_001837812.1; XR_001838416.1; XR_001838477.1; XR_593492.2; XR_001838945.1; XR_593920.2; XR_001839610.1; XR_594354.2; XR_001839825.1; XR_001840129.1; XR_594631.2; XR_594934.1; XR_359427.1; XR_359722.3; XR_001841337.1; XR_001841828.1; XR_596655.2; XR_001842563.1; ENSRNOT00000088470; ENSRNOT00000090331; ENSRNOT00000092503; TCON…
GO:0042060	wound healing	biological_process	2	139	132	10019	0.277124855	0.316411656	1.092108132	XR_001837541.1; ENSRNOT00000088470
GO:0016485	protein processing	biological_process	1	139	75	10019	0.279278877	0.318600585	0.961055156	XR_001838945.1
GO:0045893	positive regulation of transcription, DNA-templated	biological_process	10	139	645	10019	0.282739262	0.322274837	1.117505995	XR_001838945.1; XR_359722.3; TCONS_00001104; TCONS_00008340; TCONS_00008343; TCONS_00008344; TCONS_00013688; TCONS_00016132; TCONS_00016901; TCONS_00026162
GO:0051897	positive regulation of protein kinase B signaling	biological_process	1	139	76	10019	0.284432871	0.323930747	0.948409693	TCONS_00031835
GO:0008013	beta-catenin binding	molecular_function	1	139	77	10019	0.289583624	0.328961127	0.936092684	XR_594934.1
GO:0009725	response to hormone	biological_process	1	139	77	10019	0.289583624	0.328961127	0.936092684	ENSRNOT00000090331
GO:0042995	cell projection	cellular_component	1	139	77	10019	0.289583624	0.328961127	0.936092684	TCONS_00020289
GO:0008286	insulin receptor signaling pathway	biological_process	1	139	78	10019	0.294730239	0.334242978	0.924091496	XR_592045.2
GO:0007010	cytoskeleton organization	biological_process	1	139	78	10019	0.294730239	0.334242978	0.924091496	ENSRNOT00000088094
GO:0006508	proteolysis	biological_process	3	139	198	10019	0.295289703	0.334595325	1.092108132	XR_001839825.1; TCONS_00025508; TCONS_00025509
GO:0007623	circadian rhythm	biological_process	2	139	137	10019	0.29605612	0.335181382	1.052250171	XR_001841828.1; XR_596655.2
GO:0005925	focal adhesion	cellular_component	2	139	138	10019	0.299853709	0.338930783	1.044625169	XR_592045.2; XR_001837541.1
GO:0006469	negative regulation of protein kinase activity	biological_process	1	139	79	10019	0.299871845	0.338930783	0.912394135	ENSRNOT00000088470
GO:0001525	angiogenesis	biological_process	3	139	201	10019	0.304673094	0.34386858	1.07580801	XR_001837541.1; XR_001839825.1; TCONS_00020289
GO:0034976	response to endoplasmic reticulum stress	biological_process	1	139	80	10019	0.305007596	0.34386858	0.900989209	TCONS_00010803
GO:0007389	pattern specification process	biological_process	1	139	80	10019	0.305007596	0.34386858	0.900989209	TCONS_00026162
GO:0003674	molecular_function	molecular_function	20	139	1339	10019	0.306639396	0.34541875	1.076611452	XR_001837617.1; XR_001838416.1; XR_593492.2; XR_359427.1; XR_001841218.1; XR_361445.3; ENSRNOT00000090331; TCONS_00000804; TCONS_00002048; TCONS_00008895; TCONS_00010245; TCONS_00010803; TCONS_00011201; TCONS_00013688; TCONS_00019669; TCONS_00022102; TCONS_00026745; TCONS_00026759; TCONS_00026760; TCONS_00032521
GO:0009968	negative regulation of signal transduction	biological_process	1	139	81	10019	0.310136668	0.347611515	0.889865885	XR_001837541.1
GO:0005791	rough endoplasmic reticulum	cellular_component	1	139	81	10019	0.310136668	0.347611515	0.889865885	XR_001838945.1
GO:0006006	glucose metabolic process	biological_process	1	139	81	10019	0.310136668	0.347611515	0.889865885	XR_001838945.1
GO:0051091	positive regulation of DNA binding transcription factor activity	biological_process	1	139	81	10019	0.310136668	0.347611515	0.889865885	TCONS_00001104
GO:0030141	secretory granule	cellular_component	1	139	81	10019	0.310136668	0.347611515	0.889865885	TCONS_00005424
GO:0007219	Notch signaling pathway	biological_process	1	139	81	10019	0.310136668	0.347611515	0.889865885	TCONS_00026162
GO:0007166	cell surface receptor signaling pathway	biological_process	2	139	141	10019	0.311261714	0.348582019	1.022399102	XR_001836930.1; TCONS_00019110
GO:0001649	osteoblast differentiation	biological_process	1	139	82	10019	0.315258263	0.352764029	0.879013862	TCONS_00022010
GO:0005506	iron ion binding	molecular_function	1	139	83	10019	0.320371605	0.356718603	0.868423334	XR_593920.2
GO:0050821	protein stabilization	biological_process	1	139	83	10019	0.320371605	0.356718603	0.868423334	TCONS_00016132
GO:0005923	bicellular tight junction	cellular_component	1	139	83	10019	0.320371605	0.356718603	0.868423334	TCONS_00030445
GO:0005815	microtubule organizing center	cellular_component	1	139	83	10019	0.320371605	0.356718603	0.868423334	TCONS_00031835
GO:0051092	positive regulation of NF-kappaB transcription factor activity	biological_process	1	139	83	10019	0.320371605	0.356718603	0.868423334	TCONS_00038591
GO:0005768	endosome	cellular_component	3	139	206	10019	0.320383697	0.356718603	1.049696165	XR_001837541.1; XR_001838416.1; XR_001840518.1
GO:0048471	perinuclear region of cytoplasm	cellular_component	7	139	467	10019	0.321710069	0.357899125	1.080415325	XR_592045.2; XR_001837541.1; XR_353862.3; XR_353861.3; XR_001838945.1; XR_594934.1; TCONS_00005424
GO:0014068	positive regulation of phosphatidylinositol 3-kinase signaling	biological_process	1	139	84	10019	0.325475941	0.361789372	0.858084961	ENSRNOT00000088470
GO:0008285	negative regulation of cell proliferation	biological_process	5	139	340	10019	0.333253447	0.370128726	1.059987304	XR_592045.2; XR_001837541.1; XR_594934.1; TCONS_00013688; TCONS_00016132
GO:0030308	negative regulation of cell growth	biological_process	1	139	86	10019	0.335654693	0.372181008	0.838129496	XR_359722.3
GO:0004888	transmembrane signaling receptor activity	molecular_function	1	139	86	10019	0.335654693	0.372181008	0.838129496	TCONS_00022909
GO:0005515	protein binding	molecular_function	19	139	1296	10019	0.339955264	0.376639069	1.056715739	XR_590452.1; XR_592045.2; XR_001837541.1; XR_001837812.1; XR_001838477.1; XR_593347.2; XR_001838945.1; XR_001839825.1; XR_594688.1; XR_594934.1; XR_001842563.1; ENSRNOT00000092503; TCONS_00005424; TCONS_00021862; TCONS_00021863; TCONS_00022311; TCONS_00022340; TCONS_00024750; TCONS_00026162
GO:0007050	cell cycle arrest	biological_process	1	139	87	10019	0.340727712	0.376873991	0.828495824	XR_001838945.1
GO:0030036	actin cytoskeleton organization	biological_process	1	139	87	10019	0.340727712	0.376873991	0.828495824	XR_594934.1
GO:0030246	carbohydrate binding	molecular_function	1	139	88	10019	0.34578893	0.382157856	0.819081099	XR_001837726.1
GO:0045202	synapse	cellular_component	4	139	280	10019	0.348097732	0.384393636	1.029701953	XR_593347.2; XR_593920.2; TCONS_00005424; TCONS_00022102
GO:0051117	ATPase binding	molecular_function	1	139	89	10019	0.350837699	0.386467408	0.80987794	XR_001837541.1
GO:0005802	trans-Golgi network	cellular_component	1	139	89	10019	0.350837699	0.386467408	0.80987794	TCONS_00005424
GO:0006979	response to oxidative stress	biological_process	1	139	89	10019	0.350837699	0.386467408	0.80987794	TCONS_00024750
GO:0048812	neuron projection morphogenesis	biological_process	1	139	90	10019	0.355873394	0.391373438	0.800879297	XR_001836574.1
GO:0043434	response to peptide hormone	biological_process	1	139	90	10019	0.355873394	0.391373438	0.800879297	TCONS_00024750
GO:0050731	positive regulation of peptidyl-tyrosine phosphorylation	biological_process	1	139	91	10019	0.360895406	0.396248426	0.792078425	XR_592045.2
GO:0002053	positive regulation of mesenchymal cell proliferation	biological_process	1	139	91	10019	0.360895406	0.396248426	0.792078425	XR_001838945.1
GO:0045892	negative regulation of transcription, DNA-templated	biological_process	7	139	490	10019	0.370166105	0.406095768	1.029701953	XR_001838416.1; XR_593492.2; XR_001841828.1; XR_596655.2; XR_001842563.1; ENSRNOT00000092503; TCONS_00013688
GO:0000209	protein polyubiquitination	biological_process	1	139	93	10019	0.370896051	0.406564945	0.775044481	XR_001837523.1
GO:0043066	negative regulation of apoptotic process	biological_process	7	139	491	10019	0.37229263	0.407763508	1.0276048	XR_001838945.1; XR_001840129.1; XR_594631.2; XR_001842563.1; ENSRNOT00000092503; TCONS_00022010; TCONS_00024750
GO:0070588	calcium ion transmembrane transport	biological_process	1	139	95	10019	0.380835148	0.416441687	0.758727755	XR_001837812.1
GO:0008076	voltage-gated potassium channel complex	cellular_component	1	139	95	10019	0.380835148	0.416441687	0.758727755	TCONS_00005424
GO:0003779	actin binding	molecular_function	2	139	160	10019	0.383437746	0.41894701	0.900989209	TCONS_00020546; TCONS_00020554
GO:0060041	retina development in camera-type eye	biological_process	1	139	96	10019	0.385780295	0.421164364	0.750824341	XR_001838477.1
GO:0030334	regulation of cell migration	biological_process	1	139	97	10019	0.390708503	0.426198651	0.743083883	TCONS_00030445
GO:0007420	brain development	biological_process	4	139	297	10019	0.395150103	0.430694399	0.970762784	XR_001840518.1; XR_001841828.1; XR_596655.2; TCONS_00032521
GO:0007346	regulation of mitotic cell cycle	biological_process	1	139	99	10019	0.400512191	0.436185342	0.728072088	XR_001838945.1
GO:0042493	response to drug	biological_process	6	139	436	10019	0.401706493	0.437132066	0.991914725	XR_001837541.1; XR_001838945.1; XR_593920.2; TCONS_00021862; TCONS_00021863; TCONS_00024750
GO:0019904	protein domain specific binding	molecular_function	3	139	233	10019	0.405648886	0.440696012	0.928057554	XR_001837230.1; XR_594934.1; TCONS_00026162
GO:0032869	cellular response to insulin stimulus	biological_process	2	139	166	10019	0.405964579	0.440696012	0.868423334	XR_001838945.1; TCONS_00005424
GO:0030182	neuron differentiation	biological_process	2	139	166	10019	0.405964579	0.440696012	0.868423334	XR_001841828.1; XR_596655.2
GO:0005615	extracellular space	cellular_component	9	139	647	10019	0.409220385	0.443872111	1.002646415	XR_359427.1; ENSRNOT00000088470; TCONS_00001344; TCONS_00008895; TCONS_00010821; TCONS_00022010; TCONS_00022102; TCONS_00025508; TCONS_00025509
GO:0000790	nuclear chromatin	cellular_component	2	139	167	10019	0.409697411	0.44403144	0.863223194	XR_001838477.1; XR_001838945.1
GO:0071300	cellular response to retinoic acid	biological_process	1	139	101	10019	0.410242555	0.44426428	0.713654819	XR_001838945.1
GO:0009952	anterior/posterior pattern specification	biological_process	1	139	102	10019	0.415079165	0.449140367	0.706658203	TCONS_00026162
GO:0016567	protein ubiquitination	biological_process	3	139	237	10019	0.418190149	0.452142886	0.912394135	XR_001837523.1; TCONS_00019669; TCONS_00028272
GO:0008284	positive regulation of cell proliferation	biological_process	6	139	445	10019	0.422344785	0.45626806	0.971853528	XR_001837230.1; XR_001838945.1; XR_001841828.1; XR_596655.2; TCONS_00016132; TCONS_00024750
GO:0009611	response to wounding	biological_process	1	139	104	10019	0.424693225	0.458436908	0.693068622	XR_001838945.1
GO:0030054	cell junction	cellular_component	5	139	377	10019	0.425386609	0.458817152	0.95595672	XR_593347.2; TCONS_00005424; TCONS_00022102; TCONS_00024750; TCONS_00026162
GO:0048146	positive regulation of fibroblast proliferation	biological_process	1	139	106	10019	0.434225886	0.467601134	0.679991856	XR_001838945.1
GO:0050679	positive regulation of epithelial cell proliferation	biological_process	1	139	106	10019	0.434225886	0.467601134	0.679991856	XR_001838945.1
GO:0098609	cell-cell adhesion	biological_process	1	139	107	10019	0.4389608	0.472298294	0.673636792	TCONS_00022010
GO:0004871	signal transducer activity	molecular_function	2	139	175	10019	0.439290087	0.472298294	0.823761562	TCONS_00002048; TCONS_00019110
GO:0071560	cellular response to transforming growth factor beta stimulus	biological_process	1	139	108	10019	0.443674322	0.476250569	0.667399414	XR_001837541.1
GO:0051015	actin filament binding	molecular_function	1	139	108	10019	0.443674322	0.476250569	0.667399414	XR_596479.2
GO:0008360	regulation of cell shape	biological_process	1	139	109	10019	0.448366131	0.480903067	0.661276483	XR_594934.1
GO:0030336	negative regulation of cell migration	biological_process	1	139	110	10019	0.453035921	0.485524553	0.655264879	XR_594934.1
GO:0006954	inflammatory response	biological_process	2	139	179	10019	0.453881381	0.486043358	0.805353483	XR_359427.1; TCONS_00022102
GO:0045471	response to ethanol	biological_process	2	139	181	10019	0.461119501	0.493009323	0.796454549	XR_001838945.1; XR_001839825.1
GO:0004930	G-protein coupled receptor activity	molecular_function	2	139	181	10019	0.461119501	0.493009323	0.796454549	TCONS_00001104; TCONS_00022909
GO:0000165	MAPK cascade	biological_process	1	139	112	10019	0.462308277	0.493104387	0.64356372	XR_001838945.1
GO:0018105	peptidyl-serine phosphorylation	biological_process	1	139	112	10019	0.462308277	0.493104387	0.64356372	ENSRNOT00000088094
GO:0015629	actin cytoskeleton	cellular_component	1	139	112	10019	0.462308277	0.493104387	0.64356372	TCONS_00030445
GO:0016323	basolateral plasma membrane	cellular_component	2	139	182	10019	0.464723454	0.495287675	0.792078425	XR_001837541.1; XR_594688.1
GO:0007204	positive regulation of cytosolic calcium ion concentration	biological_process	1	139	113	10019	0.466910291	0.49722434	0.637868466	XR_001840518.1
GO:0043209	myelin sheath	cellular_component	1	139	114	10019	0.47148918	0.501306677	0.632273129	XR_001837812.1
GO:0015630	microtubule cytoskeleton	cellular_component	1	139	114	10019	0.47148918	0.501306677	0.632273129	TCONS_00030805
GO:0007568	aging	biological_process	3	139	255	10019	0.473760895	0.503324174	0.847989843	XR_001840518.1; ENSRNOT00000088470; TCONS_00024750
GO:0048661	positive regulation of smooth muscle cell proliferation	biological_process	1	139	115	10019	0.476044697	0.505351316	0.626775102	XR_001838945.1
GO:0035556	intracellular signal transduction	biological_process	4	139	327	10019	0.477201243	0.506179551	0.881701978	XR_001837230.1; XR_001840129.1; XR_594631.2; ENSRNOT00000088094
GO:0021987	cerebral cortex development	biological_process	1	139	117	10019	0.485084683	0.513731417	0.616060997	TCONS_00024750
GO:0045666	positive regulation of neuron differentiation	biological_process	1	139	117	10019	0.485084683	0.513731417	0.616060997	TCONS_00026162
GO:0007584	response to nutrient	biological_process	1	139	119	10019	0.494028493	0.522380757	0.605707031	XR_001837541.1
GO:0007267	cell-cell signaling	biological_process	1	139	119	10019	0.494028493	0.522380757	0.605707031	TCONS_00022010
GO:0030335	positive regulation of cell migration	biological_process	2	139	191	10019	0.496671648	0.524763053	0.754755358	TCONS_00022010; TCONS_00031835
GO:0045944	positive regulation of transcription by RNA polymerase II	biological_process	14	139	1054	10019	0.499293176	0.527118777	0.957407888	XR_590817.2; XR_001838477.1; XR_001838945.1; XR_359427.1; XR_001841828.1; XR_596655.2; XR_001842563.1; ENSRNOT00000088470; ENSRNOT00000092503; TCONS_00016132; TCONS_00018760; TCONS_00022010; TCONS_00026162; TCONS_00030445
GO:0008150	biological_process	biological_process	14	139	1058	10019	0.505468139	0.533219331	0.953788198	XR_001837617.1; XR_593492.2; XR_001841218.1; TCONS_00000804; TCONS_00001104; TCONS_00002048; TCONS_00008895; TCONS_00010245; TCONS_00011201; TCONS_00013688; TCONS_00019669; TCONS_00026745; TCONS_00026759; TCONS_00026760
GO:0005516	calmodulin binding	molecular_function	1	139	122	10019	0.50726044	0.534690667	0.590812596	TCONS_00005424
GO:0045766	positive regulation of angiogenesis	biological_process	1	139	123	10019	0.511621377	0.538865115	0.586009241	TCONS_00022010
GO:0050680	negative regulation of epithelial cell proliferation	biological_process	2	139	197	10019	0.517441939	0.544569177	0.731767885	XR_349835.3; TCONS_00019669
GO:0006351	transcription, DNA-templated	biological_process	6	139	489	10019	0.521485614	0.548395739	0.884406585	XR_001838477.1; XR_001838945.1; XR_001842563.1; ENSRNOT00000092503; TCONS_00014245; TCONS_00038591
GO:0001701	in utero embryonic development	biological_process	3	139	274	10019	0.53019348	0.557117368	0.789187628	XR_001838945.1; TCONS_00024750; TCONS_00026162
GO:0001077	transcriptional activator activity, RNA polymerase II proximal promoter sequence-specific DNA binding	molecular_function	4	139	350	10019	0.537646155	0.564507478	0.823761562	XR_590817.2; XR_001838945.1; TCONS_00016132; TCONS_00026162
GO:0000981	RNA polymerase II transcription factor activity, sequence-specific DNA binding	molecular_function	3	139	277	10019	0.538841422	0.565321149	0.78064047	XR_001838945.1; TCONS_00016132; TCONS_00026162
GO:0042593	glucose homeostasis	biological_process	1	139	134	10019	0.557905628	0.584865994	0.537904005	TCONS_00016132
GO:0030154	cell differentiation	biological_process	4	139	362	10019	0.56792194	0.594902655	0.796454549	XR_592045.2; XR_001837541.1; XR_595536.2; TCONS_00026162
GO:0043524	negative regulation of neuron apoptotic process	biological_process	1	139	140	10019	0.581819408	0.608986073	0.514850976	TCONS_00024750
GO:0007283	spermatogenesis	biological_process	2	139	217	10019	0.583207453	0.609964249	0.66432384	TCONS_00000804; TCONS_00024750
GO:0043410	positive regulation of MAPK cascade	biological_process	1	139	141	10019	0.585712325	0.612108063	0.511199551	XR_592045.2
GO:0008022	protein C-terminus binding	molecular_function	1	139	143	10019	0.593418428	0.619679958	0.504049907	TCONS_00005424
GO:0007268	chemical synaptic transmission	biological_process	1	139	144	10019	0.597231586	0.622694948	0.50054956	XR_592045.2
GO:0001822	kidney development	biological_process	1	139	144	10019	0.597231586	0.622694948	0.50054956	ENSRNOT00000088470
GO:0005794	Golgi apparatus	cellular_component	7	139	600	10019	0.597994325	0.623007256	0.840923261	XR_592045.2; XR_001837541.1; XR_353862.3; XR_353861.3; XR_595100.2; XR_001841218.1; TCONS_00032521
GO:0000978	RNA polymerase II proximal promoter sequence-specific DNA binding	molecular_function	5	139	454	10019	0.606968872	0.63186775	0.793823091	XR_590817.2; XR_001838477.1; XR_001838945.1; TCONS_00026162; TCONS_00038591
GO:0005654	nucleoplasm	cellular_component	18	139	1423	10019	0.609339072	0.633844587	0.911752959	XR_349835.3; XR_001838945.1; XR_001839825.1; XR_359722.3; XR_359962.3; XR_596864.2; TCONS_00007918; TCONS_00008340; TCONS_00008343; TCONS_00008344; TCONS_00009633; TCONS_00010245; TCONS_00010402; TCONS_00014245; TCONS_00014246; TCONS_00016132; TCONS_00016901; TCONS_00026162
GO:0003676	nucleic acid binding	molecular_function	2	139	226	10019	0.610910529	0.634988146	0.637868466	TCONS_00000804; TCONS_00010257
GO:0005622	intracellular	cellular_component	6	139	532	10019	0.611976826	0.635605275	0.812922594	XR_001837230.1; XR_592045.2; XR_001837541.1; ENSRNOT00000088094; TCONS_00024750; TCONS_00025305
GO:0005730	nucleolus	cellular_component	5	139	458	10019	0.61557698	0.63885111	0.786890139	XR_001838945.1; XR_596479.2; XR_001842563.1; ENSRNOT00000092503; TCONS_00003494
GO:0007411	axon guidance	biological_process	1	139	152	10019	0.626779572	0.649975731	0.474204847	XR_001841218.1
GO:0000122	negative regulation of transcription by RNA polymerase II	biological_process	9	139	767	10019	0.628199044	0.650945851	0.845778657	XR_001837541.1; XR_001838477.1; XR_001838945.1; XR_001841828.1; XR_596655.2; XR_001842563.1; ENSRNOT00000092503; TCONS_00019669; TCONS_00038591
GO:0042802	identical protein binding	molecular_function	8	139	694	10019	0.632263972	0.654653612	0.83088342	XR_001837541.1; XR_001839825.1; TCONS_00005424; TCONS_00019110; TCONS_00020546; TCONS_00020554; TCONS_00024750; TCONS_00030445
GO:0007186	G-protein coupled receptor signaling pathway	biological_process	3	139	314	10019	0.638366226	0.660463519	0.688654172	XR_359427.1; TCONS_00001104; TCONS_00022909
GO:0043005	neuron projection	cellular_component	4	139	392	10019	0.638947104	0.660556383	0.735501395	XR_001839825.1; XR_001842563.1; ENSRNOT00000092503; TCONS_00005424
GO:0043197	dendritic spine	cellular_component	1	139	157	10019	0.644385957	0.66566752	0.459102781	XR_593920.2
GO:0010633	negative regulation of epithelial cell migration	biological_process	1	139	162	10019	0.661336053	0.682129595	0.444932943	XR_349835.3
GO:0031175	neuron projection development	biological_process	1	139	162	10019	0.661336053	0.682129595	0.444932943	TCONS_00010821
GO:0001228	transcriptional activator activity, RNA polymerase II transcription regulatory region sequence-specific DNA binding	molecular_function	1	139	163	10019	0.664647963	0.684495797	0.442203293	TCONS_00026162
GO:0030324	lung development	biological_process	1	139	163	10019	0.664647963	0.684495797	0.442203293	TCONS_00026162
GO:0001764	neuron migration	biological_process	1	139	164	10019	0.667933997	0.687353654	0.439506931	TCONS_00019669
GO:0003700	DNA binding transcription factor activity	molecular_function	8	139	716	10019	0.669397075	0.688332619	0.805353483	NR_110672.1; XR_001838477.1; XR_001838945.1; XR_001841828.1; XR_596655.2; TCONS_00013688; TCONS_00016132; TCONS_00026162
GO:0046872	metal ion binding	molecular_function	8	139	720	10019	0.675912164	0.69450104	0.800879297	XR_001837523.1; XR_001840518.1; XR_359962.3; TCONS_00001344; TCONS_00014245; TCONS_00014246; TCONS_00019669; TCONS_00026909
GO:0005509	calcium ion binding	molecular_function	6	139	569	10019	0.682128772	0.700353587	0.760061195	XR_349835.3; XR_001837812.1; TCONS_00026745; TCONS_00026759; TCONS_00026760; TCONS_00032521
GO:0006355	regulation of transcription, DNA-templated	biological_process	8	139	725	10019	0.683950071	0.701687906	0.795355991	NR_110672.1; XR_001838477.1; XR_001838945.1; XR_001842563.1; ENSRNOT00000092503; TCONS_00014245; TCONS_00016132; TCONS_00026162
GO:0005911	cell-cell junction	cellular_component	1	139	170	10019	0.68711118	0.704393702	0.423994922	TCONS_00001104
GO:0045184	establishment of protein localization	biological_process	1	139	171	10019	0.690218329	0.707040101	0.421515419	XR_349835.3
GO:0005813	centrosome	cellular_component	2	139	255	10019	0.691630372	0.707947375	0.565326562	TCONS_00018760; TCONS_00024750
GO:0043547	positive regulation of GTPase activity	biological_process	2	139	256	10019	0.694177821	0.710014577	0.563118255	XR_592045.2; TCONS_00010245
GO:0055114	oxidation-reduction process	biological_process	2	139	257	10019	0.696709562	0.712062585	0.560927134	XR_001839103.1; XR_593920.2
GO:0008270	zinc ion binding	molecular_function	4	139	422	10019	0.702429152	0.717363105	0.683214566	NR_110672.1; XR_359962.3; TCONS_00014246; TCONS_00030445
GO:0003682	chromatin binding	molecular_function	3	139	345	10019	0.710362343	0.72491453	0.626775102	XR_591875.2; TCONS_00007918; TCONS_00016901
GO:0016477	cell migration	biological_process	1	139	181	10019	0.719920164	0.734111161	0.398227275	TCONS_00010821
GO:0042127	regulation of cell proliferation	biological_process	1	139	183	10019	0.725567159	0.738749303	0.393875064	XR_359427.1
GO:0004672	protein kinase activity	molecular_function	1	139	183	10019	0.725567159	0.738749303	0.393875064	TCONS_00019110
GO:0005856	cytoskeleton	cellular_component	1	139	185	10019	0.731118449	0.743838361	0.389616955	TCONS_00030805
GO:0044212	transcription regulatory region DNA binding	molecular_function	2	139	272	10019	0.732815187	0.745001078	0.529993652	TCONS_00013688; TCONS_00026162
GO:0006357	regulation of transcription by RNA polymerase II	biological_process	4	139	441	10019	0.738477285	0.750190293	0.653779018	XR_591875.2; XR_001838477.1; TCONS_00013688; TCONS_00026162
GO:0007399	nervous system development	biological_process	1	139	188	10019	0.739268	0.750426762	0.383399663	TCONS_00019669
GO:0030424	axon	cellular_component	3	139	365	10019	0.751013601	0.761774731	0.59243126	XR_001837812.1; XR_001838945.1; TCONS_00022102
GO:0005886	plasma membrane	cellular_component	27	139	2227	10019	0.754278204	0.764509559	0.873882663	XR_349835.3; XR_001836930.1; XR_001837230.1; XR_592045.2; XR_001837541.1; XR_001837726.1; XR_001837812.1; XR_594354.2; XR_001839825.1; XR_001840518.1; XR_595708.2; TCONS_00001104; TCONS_00005424; TCONS_00010803; TCONS_00015640; TCONS_00015641; TCONS_00019110; TCONS_00022094; TCONS_00022311; TCONS_00022340; TCONS_00022909; TCONS_00023070; TCONS_00023117; TCONS_00023121; TCONS_00025508; TCONS_00025…
GO:0004674	protein serine/threonine kinase activity	molecular_function	1	139	212	10019	0.797197081	0.807402164	0.339995928	ENSRNOT00000088094
GO:0010469	regulation of signaling receptor activity	biological_process	1	139	215	10019	0.803583306	0.813257748	0.335251799	XR_359427.1
GO:0043025	neuronal cell body	cellular_component	3	139	405	10019	0.819110083	0.828348167	0.533919531	XR_353862.3; XR_353861.3; XR_593920.2
GO:0045296	cadherin binding	molecular_function	1	139	224	10019	0.821690211	0.830333083	0.32178186	TCONS_00038591
GO:0030425	dendrite	cellular_component	3	139	414	10019	0.832147016	0.840268571	0.522312585	XR_001838477.1; TCONS_00001104; TCONS_00022102
GO:0003723	RNA binding	molecular_function	1	139	230	10019	0.832921991	0.840420164	0.313387551	XR_001842044.1
GO:0043231	intracellular membrane-bounded organelle	cellular_component	4	139	504	10019	0.83520625	0.842093258	0.57205664	XR_001839103.1; TCONS_00005424; TCONS_00021862; TCONS_00021863
GO:0005887	integral component of plasma membrane	cellular_component	6	139	687	10019	0.84862541	0.854982154	0.629512111	XR_590452.1; XR_001836930.1; XR_592045.2; XR_001837541.1; XR_594688.1; TCONS_00020289
GO:0006468	protein phosphorylation	biological_process	2	139	336	10019	0.850303426	0.856031518	0.42904248	ENSRNOT00000088094; TCONS_00019110
GO:0007275	multicellular organism development	biological_process	1	139	249	10019	0.86442223	0.86959454	0.289474445	XR_591875.2
GO:0005575	cellular_component	cellular_component	12	139	1204	10019	0.867362413	0.871900183	0.718396711	XR_001837617.1; XR_593492.2; XR_001841218.1; TCONS_00000804; TCONS_00001104; TCONS_00002048; TCONS_00010245; TCONS_00011201; TCONS_00013688; TCONS_00026745; TCONS_00026759; TCONS_00026760
GO:0014069	postsynaptic density	cellular_component	1	139	253	10019	0.870324695	0.874224582	0.284897773	XR_593347.2
GO:0000977	RNA polymerase II regulatory region sequence-specific DNA binding	molecular_function	1	139	256	10019	0.874596745	0.877860166	0.281559128	XR_001838477.1
GO:0005634	nucleus	cellular_component	38	139	3251	10019	0.886866482	0.889511871	0.84251221	XR_349835.3; XR_590817.2; NR_110672.1; XR_591875.2; XR_001837812.1; XR_592751.2; XR_001838477.1; XR_593492.2; XR_001838945.1; XR_001839825.1; XR_001840129.1; XR_594631.2; XR_594934.1; XR_359722.3; XR_359962.3; XR_001841828.1; XR_596655.2; XR_361445.3; XR_001842563.1; XR_597351.2; ENSRNOT00000092503; TCONS_00003494; TCONS_00006065; TCONS_00008340; TCONS_00008343; TCONS_00008344; TCONS_00009633; TC…
GO:0043565	sequence-specific DNA binding	molecular_function	4	139	581	10019	0.911907962	0.913946505	0.496241905	XR_001838477.1; XR_001838945.1; TCONS_00013688; TCONS_00026162
GO:0003677	DNA binding	molecular_function	6	139	796	10019	0.932633173	0.934022054	0.543310076	XR_001838477.1; XR_001838945.1; XR_359962.3; TCONS_00014246; TCONS_00026162; TCONS_00038591
GO:0007165	signal transduction	biological_process	2	139	447	10019	0.95118003	0.951887753	0.32250173	XR_001840518.1; TCONS_00022010
GO:0006366	transcription by RNA polymerase II	biological_process	3	139	572	10019	0.960881987	0.960881987	0.37803743	XR_590817.2; XR_001838945.1; TCONS_00026162
