# Supplementary material for: Comprehensive Analysis of the Profiles of Differentially Expressed mRNAs, lncRNAs, and circRNAs in Phosgene-Induced Acute Lung Injury
Source: Biomed Res Int. 2021 Jan 9;2021:6278526. doi: 10.1155/2021/6278526 (PMC7811572; doi:10.1155/2021/6278526)
Supplement: Supplementary 12 — Table S12: GO with differentially expressed circRNAs between the A and B group. [file 6278526.f12.txt]

Table S12 GO with differentially expressed circRNAs between A and B group
id	Term	Category	ListHits	ListTotal	PopHits	PopTotal	pValue	qValue	Enrichment_score	Gene
GO:0007586	digestion	biological_process	1	46	1	6636	0	0	144.2608696	circRNA_3235|Chr19:43899905_43908769_-
GO:0032119	sequestering of zinc ion	biological_process	1	46	1	6636	0	0	144.2608696	circRNA_3753|Chr2:218919131_218929338_-
GO:2000584	negative regulation of platelet-derived growth factor receptor-alpha signaling pathway	biological_process	1	46	1	6636	0	0	144.2608696	circRNA_4627|Chr4:38263240_38271681_+
GO:0004345	glucose-6-phosphate dehydrogenase activity	molecular_function	1	46	1	6636	0	0	144.2608696	circRNA_5485|Chr5:167014847_167016955_-
GO:0017057	6-phosphogluconolactonase activity	molecular_function	1	46	1	6636	0	0	144.2608696	circRNA_5485|Chr5:167014847_167016955_-
GO:0097305	response to alcohol	biological_process	1	46	1	6636	0	0	144.2608696	circRNA_5485|Chr5:167014847_167016955_-
GO:0002763	positive regulation of myeloid leukocyte differentiation	biological_process	1	46	1	6636	0	0	144.2608696	circRNA_6087|Chr7:42328501_42339634_+
GO:0033026	negative regulation of mast cell apoptotic process	biological_process	1	46	1	6636	0	0	144.2608696	circRNA_6087|Chr7:42328501_42339634_+
GO:0002376	immune system process	biological_process	3	46	10	6636	4.12E-07	2.21E-05	43.27826087	circRNA_4916|Chr4:157436084_157436365_-; circRNA_4917|Chr4:157436084_157436371_-; circRNA_4919|Chr4:157436084_157436610_-
GO:0004857	enzyme inhibitor activity	molecular_function	3	46	18	6636	5.76E-06	0.000278844	24.04347826	circRNA_4916|Chr4:157436084_157436365_-; circRNA_4917|Chr4:157436084_157436371_-; circRNA_4919|Chr4:157436084_157436610_-
GO:0001730	2'-5'-oligoadenylate synthetase activity	molecular_function	1	46	2	6636	4.70E-05	0.00108355	72.13043478	circRNA_1603|Chr12:41157218_41200958_+
GO:0060700	regulation of ribonuclease activity	biological_process	1	46	2	6636	4.70E-05	0.00108355	72.13043478	circRNA_1603|Chr12:41157218_41200958_+
GO:0043240	Fanconi anaemia nuclear complex	cellular_component	1	46	2	6636	4.70E-05	0.00108355	72.13043478	circRNA_2171|Chr14:110683107_110709166_+
GO:0008494	translation activator activity	molecular_function	1	46	2	6636	4.70E-05	0.00108355	72.13043478	circRNA_3425|Chr2:52310449_52313280_+
GO:0006829	zinc ion transport	biological_process	1	46	2	6636	4.70E-05	0.00108355	72.13043478	circRNA_3753|Chr2:218919131_218929338_-
GO:0061088	regulation of sequestering of zinc ion	biological_process	1	46	2	6636	4.70E-05	0.00108355	72.13043478	circRNA_3753|Chr2:218919131_218929338_-
GO:0072201	negative regulation of mesenchymal cell proliferation	biological_process	1	46	2	6636	4.70E-05	0.00108355	72.13043478	circRNA_4627|Chr4:38263240_38271681_+
GO:0031584	activation of phospholipase D activity	biological_process	1	46	2	6636	4.70E-05	0.00108355	72.13043478	circRNA_6060|Chr7:29284390_29288495_+
GO:1902954	regulation of early endosome to recycling endosome transport	biological_process	1	46	2	6636	4.70E-05	0.00108355	72.13043478	circRNA_6735|Chr8:112777013_112778440_-
GO:0043374	CD8-positive, alpha-beta T cell differentiation	biological_process	1	46	2	6636	4.70E-05	0.00108355	72.13043478	circRNA_6825|Chr9:2205172_2246426_+
GO:0060004	reflex	biological_process	1	46	2	6636	4.70E-05	0.00108355	72.13043478	circRNA_6825|Chr9:2205172_2246426_+
GO:0060052	neurofilament cytoskeleton organization	biological_process	2	46	11	6636	4.95E-05	0.001088643	26.22924901	circRNA_3342|Chr2:25786589_25787923_-; circRNA_3346|Chr2:25924932_25927179_-
GO:0043086	negative regulation of catalytic activity	biological_process	3	46	33	6636	7.14E-05	0.001502526	13.11462451	circRNA_4916|Chr4:157436084_157436365_-; circRNA_4917|Chr4:157436084_157436371_-; circRNA_4919|Chr4:157436084_157436610_-
GO:0001755	neural crest cell migration	biological_process	2	46	14	6636	0.000107583	0.001998877	20.60869565	circRNA_4178|Chr3:44500847_44522988_-; circRNA_6087|Chr7:42328501_42339634_+
GO:0016316	phosphatidylinositol-3,4-bisphosphate 4-phosphatase activity	molecular_function	1	46	3	6636	0.000140417	0.001998877	48.08695652	circRNA_3154|Chr19:29642344_29645344_-
GO:0034594	phosphatidylinositol trisphosphate phosphatase activity	molecular_function	1	46	3	6636	0.000140417	0.001998877	48.08695652	circRNA_3154|Chr19:29642344_29645344_-
GO:0034597	phosphatidylinositol-4,5-bisphosphate 4-phosphatase activity	molecular_function	1	46	3	6636	0.000140417	0.001998877	48.08695652	circRNA_3154|Chr19:29642344_29645344_-
GO:0071577	zinc ion transmembrane transport	biological_process	1	46	3	6636	0.000140417	0.001998877	48.08695652	circRNA_3753|Chr2:218919131_218929338_-
GO:0001565	phorbol ester receptor activity	molecular_function	1	46	3	6636	0.000140417	0.001998877	48.08695652	circRNA_4225|Chr3:60610877_60624155_-
GO:0006739	NADP metabolic process	biological_process	1	46	3	6636	0.000140417	0.001998877	48.08695652	circRNA_5485|Chr5:167014847_167016955_-
GO:0032527	protein exit from endoplasmic reticulum	biological_process	1	46	3	6636	0.000140417	0.001998877	48.08695652	circRNA_5784|Chr6:80235400_80248440_+
GO:1905097	regulation of guanyl-nucleotide exchange factor activity	biological_process	1	46	3	6636	0.000140417	0.001998877	48.08695652	circRNA_5784|Chr6:80235400_80248440_+
GO:0009404	toxin metabolic process	biological_process	1	46	3	6636	0.000140417	0.001998877	48.08695652	circRNA_6060|Chr7:29284390_29288495_+
GO:0005173	stem cell factor receptor binding	molecular_function	1	46	3	6636	0.000140417	0.001998877	48.08695652	circRNA_6087|Chr7:42328501_42339634_+
GO:0042110	T cell activation	biological_process	2	46	17	6636	0.000198068	0.002739003	16.97186701	circRNA_4461|Chr3:152966158_152973518_-; circRNA_6825|Chr9:2205172_2246426_+
GO:0016779	nucleotidyltransferase activity	molecular_function	1	46	4	6636	0.000279593	0.002819228	36.06521739	circRNA_1603|Chr12:41157218_41200958_+
GO:0008327	methyl-CpG binding	molecular_function	1	46	4	6636	0.000279593	0.002819228	36.06521739	circRNA_3048|Chr18:65825830_65841509_+
GO:0005385	zinc ion transmembrane transporter activity	molecular_function	1	46	4	6636	0.000279593	0.002819228	36.06521739	circRNA_3753|Chr2:218919131_218929338_-
GO:0016361	activin receptor activity, type I	molecular_function	1	46	4	6636	0.000279593	0.002819228	36.06521739	circRNA_4178|Chr3:44500847_44522988_-
GO:0048641	regulation of skeletal muscle tissue development	biological_process	1	46	4	6636	0.000279593	0.002819228	36.06521739	circRNA_4178|Chr3:44500847_44522988_-
GO:0060923	cardiac muscle cell fate commitment	biological_process	1	46	4	6636	0.000279593	0.002819228	36.06521739	circRNA_4178|Chr3:44500847_44522988_-
GO:0061445	endocardial cushion cell fate commitment	biological_process	1	46	4	6636	0.000279593	0.002819228	36.06521739	circRNA_4178|Chr3:44500847_44522988_-
GO:2000791	negative regulation of mesenchymal cell proliferation involved in lung development	biological_process	1	46	4	6636	0.000279593	0.002819228	36.06521739	circRNA_4627|Chr4:38263240_38271681_+
GO:0007130	synaptonemal complex assembly	biological_process	1	46	4	6636	0.000279593	0.002819228	36.06521739	circRNA_5382|Chr5:144539229_144547479_-
GO:0006098	pentose-phosphate shunt	biological_process	1	46	4	6636	0.000279593	0.002819228	36.06521739	circRNA_5485|Chr5:167014847_167016955_-
GO:0045636	positive regulation of melanocyte differentiation	biological_process	1	46	4	6636	0.000279593	0.002819228	36.06521739	circRNA_6087|Chr7:42328501_42339634_+
GO:0070668	positive regulation of mast cell proliferation	biological_process	1	46	4	6636	0.000279593	0.002819228	36.06521739	circRNA_6087|Chr7:42328501_42339634_+
GO:0097192	extrinsic apoptotic signaling pathway in absence of ligand	biological_process	1	46	4	6636	0.000279593	0.002819228	36.06521739	circRNA_6087|Chr7:42328501_42339634_+
GO:0014728	regulation of the force of skeletal muscle contraction	biological_process	1	46	5	6636	0.000463929	0.003621643	28.85217391	circRNA_2246|Chr15:33610716_33637119_-
GO:0031449	regulation of slow-twitch skeletal muscle fiber contraction	biological_process	1	46	5	6636	0.000463929	0.003621643	28.85217391	circRNA_2246|Chr15:33610716_33637119_-
GO:1905243	cellular response to 3,3',5-triiodo-L-thyronine	biological_process	1	46	5	6636	0.000463929	0.003621643	28.85217391	circRNA_2246|Chr15:33610716_33637119_-
GO:0034593	phosphatidylinositol bisphosphate phosphatase activity	molecular_function	1	46	5	6636	0.000463929	0.003621643	28.85217391	circRNA_3154|Chr19:29642344_29645344_-
GO:0001655	urogenital system development	biological_process	1	46	5	6636	0.000463929	0.003621643	28.85217391	circRNA_4178|Chr3:44500847_44522988_-
GO:0003274	endocardial cushion fusion	biological_process	1	46	5	6636	0.000463929	0.003621643	28.85217391	circRNA_4178|Chr3:44500847_44522988_-
GO:0005025	transforming growth factor beta receptor activity, type I	molecular_function	1	46	5	6636	0.000463929	0.003621643	28.85217391	circRNA_4178|Chr3:44500847_44522988_-
GO:0048179	activin receptor complex	cellular_component	1	46	5	6636	0.000463929	0.003621643	28.85217391	circRNA_4178|Chr3:44500847_44522988_-
GO:0048185	activin binding	molecular_function	1	46	5	6636	0.000463929	0.003621643	28.85217391	circRNA_4178|Chr3:44500847_44522988_-
GO:0060389	pathway-restricted SMAD protein phosphorylation	biological_process	1	46	5	6636	0.000463929	0.003621643	28.85217391	circRNA_4178|Chr3:44500847_44522988_-
GO:0061312	BMP signaling pathway involved in heart development	biological_process	1	46	5	6636	0.000463929	0.003621643	28.85217391	circRNA_4178|Chr3:44500847_44522988_-
GO:1905007	positive regulation of epithelial to mesenchymal transition involved in endocardial cushion formation	biological_process	1	46	5	6636	0.000463929	0.003621643	28.85217391	circRNA_4178|Chr3:44500847_44522988_-
GO:0051152	positive regulation of smooth muscle cell differentiation	biological_process	1	46	5	6636	0.000463929	0.003621643	28.85217391	circRNA_6536|Chr8:67801800_67812158_-
GO:0050798	activated T cell proliferation	biological_process	1	46	5	6636	0.000463929	0.003621643	28.85217391	circRNA_6825|Chr9:2205172_2246426_+
GO:0030049	muscle filament sliding	biological_process	1	46	6	6636	0.000692821	0.0045935	24.04347826	circRNA_2246|Chr15:33610716_33637119_-
GO:0032982	myosin filament	cellular_component	1	46	6	6636	0.000692821	0.0045935	24.04347826	circRNA_2246|Chr15:33610716_33637119_-
GO:0002526	acute inflammatory response	biological_process	1	46	6	6636	0.000692821	0.0045935	24.04347826	circRNA_4178|Chr3:44500847_44522988_-
GO:0032926	negative regulation of activin receptor signaling pathway	biological_process	1	46	6	6636	0.000692821	0.0045935	24.04347826	circRNA_4178|Chr3:44500847_44522988_-
GO:0050849	negative regulation of calcium-mediated signaling	biological_process	1	46	6	6636	0.000692821	0.0045935	24.04347826	circRNA_4461|Chr3:152966158_152973518_-
GO:0005125	cytokine activity	molecular_function	1	46	6	6636	0.000692821	0.0045935	24.04347826	circRNA_6087|Chr7:42328501_42339634_+
GO:1902035	positive regulation of hematopoietic stem cell proliferation	biological_process	1	46	6	6636	0.000692821	0.0045935	24.04347826	circRNA_6087|Chr7:42328501_42339634_+
GO:0061665	SUMO ligase activity	molecular_function	1	46	6	6636	0.000692821	0.0045935	24.04347826	circRNA_6536|Chr8:67801800_67812158_-
GO:0043367	CD4-positive, alpha-beta T cell differentiation	biological_process	1	46	6	6636	0.000692821	0.0045935	24.04347826	circRNA_6825|Chr9:2205172_2246426_+
GO:0033320	UDP-D-xylose biosynthetic process	biological_process	1	46	6	6636	0.000692821	0.0045935	24.04347826	circRNA_6844|Chr9:11209034_11219449_-
GO:0048040	UDP-glucuronate decarboxylase activity	molecular_function	1	46	6	6636	0.000692821	0.0045935	24.04347826	circRNA_6844|Chr9:11209034_11219449_-
GO:0021955	central nervous system neuron axonogenesis	biological_process	2	46	27	6636	0.00081161	0.004868579	10.68599034	circRNA_3342|Chr2:25786589_25787923_-; circRNA_3346|Chr2:25924932_25927179_-
GO:0003025	regulation of systemic arterial blood pressure by baroreceptor feedback	biological_process	1	46	7	6636	0.000965669	0.004868579	20.60869565	circRNA_0212|Chr1:104785950_104795565_+
GO:0021563	glossopharyngeal nerve development	biological_process	1	46	7	6636	0.000965669	0.004868579	20.60869565	circRNA_0212|Chr1:104785950_104795565_+
GO:0021564	vagus nerve development	biological_process	1	46	7	6636	0.000965669	0.004868579	20.60869565	circRNA_0212|Chr1:104785950_104795565_+
GO:0005859	muscle myosin complex	cellular_component	1	46	7	6636	0.000965669	0.004868579	20.60869565	circRNA_2246|Chr15:33610716_33637119_-
GO:0051645	Golgi localization	biological_process	1	46	7	6636	0.000965669	0.004868579	20.60869565	circRNA_2836|Chr17:87758882_87771508_-
GO:0006346	methylation-dependent chromatin silencing	biological_process	1	46	7	6636	0.000965669	0.004868579	20.60869565	circRNA_3048|Chr18:65825830_65841509_+
GO:0032094	response to food	biological_process	1	46	7	6636	0.000965669	0.004868579	20.60869565	circRNA_3235|Chr19:43899905_43908769_-
GO:0010650	positive regulation of cell communication by electrical coupling	biological_process	1	46	7	6636	0.000965669	0.004868579	20.60869565	circRNA_3949|Chr20:20259263_20276110_+
GO:0034112	positive regulation of homotypic cell-cell adhesion	biological_process	1	46	7	6636	0.000965669	0.004868579	20.60869565	circRNA_3949|Chr20:20259263_20276110_+
GO:0043266	regulation of potassium ion transport	biological_process	1	46	7	6636	0.000965669	0.004868579	20.60869565	circRNA_3949|Chr20:20259263_20276110_+
GO:0045838	positive regulation of membrane potential	biological_process	1	46	7	6636	0.000965669	0.004868579	20.60869565	circRNA_3949|Chr20:20259263_20276110_+
GO:0071286	cellular response to magnesium ion	biological_process	1	46	7	6636	0.000965669	0.004868579	20.60869565	circRNA_3949|Chr20:20259263_20276110_+
GO:0072660	maintenance of protein location in plasma membrane	biological_process	1	46	7	6636	0.000965669	0.004868579	20.60869565	circRNA_3949|Chr20:20259263_20276110_+
GO:0099612	protein localization to axon	biological_process	1	46	7	6636	0.000965669	0.004868579	20.60869565	circRNA_3949|Chr20:20259263_20276110_+
GO:1900827	positive regulation of membrane depolarization during cardiac muscle cell action potential	biological_process	1	46	7	6636	0.000965669	0.004868579	20.60869565	circRNA_3949|Chr20:20259263_20276110_+
GO:0071385	cellular response to glucocorticoid stimulus	biological_process	1	46	7	6636	0.000965669	0.004868579	20.60869565	circRNA_4178|Chr3:44500847_44522988_-
GO:2000017	positive regulation of determination of dorsal identity	biological_process	1	46	7	6636	0.000965669	0.004868579	20.60869565	circRNA_4178|Chr3:44500847_44522988_-
GO:0042954	lipoprotein transporter activity	molecular_function	1	46	7	6636	0.000965669	0.004868579	20.60869565	circRNA_5784|Chr6:80235400_80248440_+
GO:0070973	protein localization to endoplasmic reticulum exit site	biological_process	1	46	7	6636	0.000965669	0.004868579	20.60869565	circRNA_5784|Chr6:80235400_80248440_+
GO:0002687	positive regulation of leukocyte migration	biological_process	1	46	7	6636	0.000965669	0.004868579	20.60869565	circRNA_6087|Chr7:42328501_42339634_+
GO:0033235	positive regulation of protein sumoylation	biological_process	1	46	7	6636	0.000965669	0.004868579	20.60869565	circRNA_6536|Chr8:67801800_67812158_-
GO:2000641	regulation of early endosome to late endosome transport	biological_process	1	46	7	6636	0.000965669	0.004868579	20.60869565	circRNA_6735|Chr8:112777013_112778440_-
GO:0021554	optic nerve development	biological_process	1	46	8	6636	0.001281877	0.005539542	18.0326087	circRNA_0212|Chr1:104785950_104795565_+
GO:0014886	transition between slow and fast fiber	biological_process	1	46	8	6636	0.001281877	0.005539542	18.0326087	circRNA_1551|Chr12:25431687_25435591_+
GO:0045197	establishment or maintenance of epithelial cell apical/basal polarity	biological_process	1	46	8	6636	0.001281877	0.005539542	18.0326087	circRNA_2512|Chr16:50437205_50487053_-
GO:0046850	regulation of bone remodeling	biological_process	1	46	8	6636	0.001281877	0.005539542	18.0326087	circRNA_3154|Chr19:29642344_29645344_-
GO:0042612	MHC class I protein complex	cellular_component	1	46	8	6636	0.001281877	0.005539542	18.0326087	circRNA_3871|Chr20:3196267_3282058_+
GO:0010960	magnesium ion homeostasis	biological_process	1	46	8	6636	0.001281877	0.005539542	18.0326087	circRNA_3949|Chr20:20259263_20276110_+
GO:0014731	spectrin-associated cytoskeleton	cellular_component	1	46	8	6636	0.001281877	0.005539542	18.0326087	circRNA_3949|Chr20:20259263_20276110_+
GO:0033268	node of Ranvier	cellular_component	1	46	8	6636	0.001281877	0.005539542	18.0326087	circRNA_3949|Chr20:20259263_20276110_+
GO:0003289	atrial septum primum morphogenesis	biological_process	1	46	8	6636	0.001281877	0.005539542	18.0326087	circRNA_4178|Chr3:44500847_44522988_-
GO:0060037	pharyngeal system development	biological_process	1	46	8	6636	0.001281877	0.005539542	18.0326087	circRNA_4178|Chr3:44500847_44522988_-
GO:0030162	regulation of proteolysis	biological_process	1	46	8	6636	0.001281877	0.005539542	18.0326087	circRNA_4559|Chr4:10437864_10452881_-
GO:0007140	male meiotic nuclear division	biological_process	1	46	8	6636	0.001281877	0.005539542	18.0326087	circRNA_5382|Chr5:144539229_144547479_-
GO:0035279	mRNA cleavage involved in gene silencing by miRNA	biological_process	1	46	8	6636	0.001281877	0.005539542	18.0326087	circRNA_5382|Chr5:144539229_144547479_-
GO:0090625	mRNA cleavage involved in gene silencing by siRNA	biological_process	1	46	8	6636	0.001281877	0.005539542	18.0326087	circRNA_5382|Chr5:144539229_144547479_-
GO:0050661	NADP binding	molecular_function	1	46	8	6636	0.001281877	0.005539542	18.0326087	circRNA_5485|Chr5:167014847_167016955_-
GO:0070403	NAD+ binding	molecular_function	1	46	8	6636	0.001281877	0.005539542	18.0326087	circRNA_6844|Chr9:11209034_11219449_-
GO:0035023	regulation of Rho protein signal transduction	biological_process	4	46	123	6636	0.00150507	0.006446495	4.691410392	circRNA_3342|Chr2:25786589_25787923_-; circRNA_3346|Chr2:25924932_25927179_-; circRNA_5020|Chr5:7725207_7780390_-; circRNA_5027|Chr5:7763385_7798747_-
GO:0045071	negative regulation of viral genome replication	biological_process	1	46	9	6636	0.00164086	0.006456718	16.02898551	circRNA_1603|Chr12:41157218_41200958_+
GO:0006941	striated muscle contraction	biological_process	1	46	9	6636	0.00164086	0.006456718	16.02898551	circRNA_2246|Chr15:33610716_33637119_-
GO:0034622	cellular protein-containing complex assembly	biological_process	1	46	9	6636	0.00164086	0.006456718	16.02898551	circRNA_3048|Chr18:65825830_65841509_+
GO:0035280	miRNA loading onto RISC involved in gene silencing by miRNA	biological_process	1	46	9	6636	0.00164086	0.006456718	16.02898551	circRNA_5382|Chr5:144539229_144547479_-
GO:0070328	triglyceride homeostasis	biological_process	1	46	9	6636	0.00164086	0.006456718	16.02898551	circRNA_5784|Chr6:80235400_80248440_+
GO:0070971	endoplasmic reticulum exit site	cellular_component	1	46	9	6636	0.00164086	0.006456718	16.02898551	circRNA_5784|Chr6:80235400_80248440_+
GO:0035331	negative regulation of hippo signaling	biological_process	1	46	9	6636	0.00164086	0.006456718	16.02898551	circRNA_5975|Chr6:136059672_136084622_+
GO:0008047	enzyme activator activity	molecular_function	1	46	9	6636	0.00164086	0.006456718	16.02898551	circRNA_6060|Chr7:29284390_29288495_+
GO:0046579	positive regulation of Ras protein signal transduction	biological_process	1	46	9	6636	0.00164086	0.006456718	16.02898551	circRNA_6087|Chr7:42328501_42339634_+
GO:0005720	nuclear heterochromatin	cellular_component	1	46	9	6636	0.00164086	0.006456718	16.02898551	circRNA_6825|Chr9:2205172_2246426_+
GO:0030175	filopodium	cellular_component	2	46	35	6636	0.001747015	0.006764442	8.243478261	circRNA_2512|Chr16:50437205_50487053_-; circRNA_6087|Chr7:42328501_42339634_+
GO:0000082	G1/S transition of mitotic cell cycle	biological_process	2	46	35	6636	0.001747015	0.006764442	8.243478261	circRNA_4178|Chr3:44500847_44522988_-; circRNA_6536|Chr8:67801800_67812158_-
GO:0042127	regulation of cell proliferation	biological_process	4	46	128	6636	0.00179606	0.006899151	4.508152174	circRNA_2171|Chr14:110683107_110709166_+; circRNA_3048|Chr18:65825830_65841509_+; circRNA_4461|Chr3:152966158_152973518_-; circRNA_6536|Chr8:67801800_67812158_-
GO:0009790	embryo development	biological_process	1	46	10	6636	0.002042034	0.007059604	14.42608696	circRNA_1551|Chr12:25431687_25435591_+
GO:0007276	gamete generation	biological_process	1	46	10	6636	0.002042034	0.007059604	14.42608696	circRNA_2171|Chr14:110683107_110709166_+
GO:0046034	ATP metabolic process	biological_process	1	46	10	6636	0.002042034	0.007059604	14.42608696	circRNA_2246|Chr15:33610716_33637119_-
GO:0030163	protein catabolic process	biological_process	1	46	10	6636	0.002042034	0.007059604	14.42608696	circRNA_3235|Chr19:43899905_43908769_-
GO:0010043	response to zinc ion	biological_process	1	46	10	6636	0.002042034	0.007059604	14.42608696	circRNA_3753|Chr2:218919131_218929338_-
GO:0019228	neuronal action potential	biological_process	1	46	10	6636	0.002042034	0.007059604	14.42608696	circRNA_3949|Chr20:20259263_20276110_+
GO:0043194	axon initial segment	cellular_component	1	46	10	6636	0.002042034	0.007059604	14.42608696	circRNA_3949|Chr20:20259263_20276110_+
GO:1902260	negative regulation of delayed rectifier potassium channel activity	biological_process	1	46	10	6636	0.002042034	0.007059604	14.42608696	circRNA_3949|Chr20:20259263_20276110_+
GO:0010586	miRNA metabolic process	biological_process	1	46	10	6636	0.002042034	0.007059604	14.42608696	circRNA_5382|Chr5:144539229_144547479_-
GO:0016442	RISC complex	cellular_component	1	46	10	6636	0.002042034	0.007059604	14.42608696	circRNA_5382|Chr5:144539229_144547479_-
GO:0035068	micro-ribonucleoprotein complex	cellular_component	1	46	10	6636	0.002042034	0.007059604	14.42608696	circRNA_5382|Chr5:144539229_144547479_-
GO:0042953	lipoprotein transport	biological_process	1	46	10	6636	0.002042034	0.007059604	14.42608696	circRNA_5784|Chr6:80235400_80248440_+
GO:0035162	embryonic hemopoiesis	biological_process	1	46	10	6636	0.002042034	0.007059604	14.42608696	circRNA_6087|Chr7:42328501_42339634_+
GO:0065004	protein-DNA complex assembly	biological_process	1	46	10	6636	0.002042034	0.007059604	14.42608696	circRNA_6536|Chr8:67801800_67812158_-
GO:0044030	regulation of DNA methylation	biological_process	1	46	11	6636	0.002484823	0.008351767	13.11462451	circRNA_3048|Chr18:65825830_65841509_+
GO:0003183	mitral valve morphogenesis	biological_process	1	46	11	6636	0.002484823	0.008351767	13.11462451	circRNA_4178|Chr3:44500847_44522988_-
GO:0003203	endocardial cushion morphogenesis	biological_process	1	46	11	6636	0.002484823	0.008351767	13.11462451	circRNA_4178|Chr3:44500847_44522988_-
GO:0070578	RISC-loading complex	cellular_component	1	46	11	6636	0.002484823	0.008351767	13.11462451	circRNA_5382|Chr5:144539229_144547479_-
GO:0006955	immune response	biological_process	2	46	41	6636	0.002763999	0.009151781	7.037115589	circRNA_1603|Chr12:41157218_41200958_+; circRNA_3871|Chr20:3196267_3282058_+
GO:0003009	skeletal muscle contraction	biological_process	1	46	12	6636	0.002968656	0.009151781	12.02173913	circRNA_2246|Chr15:33610716_33637119_-
GO:0030898	actin-dependent ATPase activity	molecular_function	1	46	12	6636	0.002968656	0.009151781	12.02173913	circRNA_2246|Chr15:33610716_33637119_-
GO:0048593	camera-type eye morphogenesis	biological_process	1	46	12	6636	0.002968656	0.009151781	12.02173913	circRNA_2512|Chr16:50437205_50487053_-
GO:0051683	establishment of Golgi localization	biological_process	1	46	12	6636	0.002968656	0.009151781	12.02173913	circRNA_2836|Chr17:87758882_87771508_-
GO:0035197	siRNA binding	molecular_function	1	46	12	6636	0.002968656	0.009151781	12.02173913	circRNA_3048|Chr18:65825830_65841509_+
GO:0071709	membrane assembly	biological_process	1	46	12	6636	0.002968656	0.009151781	12.02173913	circRNA_3949|Chr20:20259263_20276110_+
GO:0090314	positive regulation of protein targeting to membrane	biological_process	1	46	12	6636	0.002968656	0.009151781	12.02173913	circRNA_3949|Chr20:20259263_20276110_+
GO:2000651	positive regulation of sodium ion transmembrane transporter activity	biological_process	1	46	12	6636	0.002968656	0.009151781	12.02173913	circRNA_3949|Chr20:20259263_20276110_+
GO:0032924	activin receptor signaling pathway	biological_process	1	46	12	6636	0.002968656	0.009151781	12.02173913	circRNA_4178|Chr3:44500847_44522988_-
GO:0006402	mRNA catabolic process	biological_process	1	46	12	6636	0.002968656	0.009151781	12.02173913	circRNA_5382|Chr5:144539229_144547479_-
GO:0016925	protein sumoylation	biological_process	1	46	12	6636	0.002968656	0.009151781	12.02173913	circRNA_6536|Chr8:67801800_67812158_-
GO:0019789	SUMO transferase activity	molecular_function	1	46	12	6636	0.002968656	0.009151781	12.02173913	circRNA_6536|Chr8:67801800_67812158_-
GO:0005764	lysosome	cellular_component	3	46	89	6636	0.003210687	0.009772234	4.86272594	circRNA_3235|Chr19:43899905_43908769_-; circRNA_3949|Chr20:20259263_20276110_+; circRNA_6692|Chr8:96029825_96046465_-
GO:0000146	microfilament motor activity	molecular_function	1	46	13	6636	0.003492968	0.009772234	11.09698997	circRNA_2246|Chr15:33610716_33637119_-
GO:0055010	ventricular cardiac muscle tissue morphogenesis	biological_process	1	46	13	6636	0.003492968	0.009772234	11.09698997	circRNA_2246|Chr15:33610716_33637119_-
GO:0051684	maintenance of Golgi location	biological_process	1	46	13	6636	0.003492968	0.009772234	11.09698997	circRNA_2836|Chr17:87758882_87771508_-
GO:0072384	organelle transport along microtubule	biological_process	1	46	13	6636	0.003492968	0.009772234	11.09698997	circRNA_2836|Chr17:87758882_87771508_-
GO:0035563	positive regulation of chromatin binding	biological_process	1	46	13	6636	0.003492968	0.009772234	11.09698997	circRNA_3048|Chr18:65825830_65841509_+
GO:0046822	regulation of nucleocytoplasmic transport	biological_process	1	46	13	6636	0.003492968	0.009772234	11.09698997	circRNA_3154|Chr19:29642344_29645344_-
GO:0002474	antigen processing and presentation of peptide antigen via MHC class I	biological_process	1	46	13	6636	0.003492968	0.009772234	11.09698997	circRNA_3871|Chr20:3196267_3282058_+
GO:0042605	peptide antigen binding	molecular_function	1	46	13	6636	0.003492968	0.009772234	11.09698997	circRNA_3871|Chr20:3196267_3282058_+
GO:0003143	embryonic heart tube morphogenesis	biological_process	1	46	13	6636	0.003492968	0.009772234	11.09698997	circRNA_4178|Chr3:44500847_44522988_-
GO:0050770	regulation of axonogenesis	biological_process	1	46	13	6636	0.003492968	0.009772234	11.09698997	circRNA_4225|Chr3:60610877_60624155_-
GO:0006754	ATP biosynthetic process	biological_process	1	46	13	6636	0.003492968	0.009772234	11.09698997	circRNA_4612|Chr4:31220330_31320090_+
GO:0035914	skeletal muscle cell differentiation	biological_process	1	46	13	6636	0.003492968	0.009772234	11.09698997	circRNA_5590|Chr6:12179226_12194014_+
GO:0048193	Golgi vesicle transport	biological_process	1	46	13	6636	0.003492968	0.009772234	11.09698997	circRNA_6060|Chr7:29284390_29288495_+
GO:0035234	ectopic germ cell programmed cell death	biological_process	1	46	13	6636	0.003492968	0.009772234	11.09698997	circRNA_6087|Chr7:42328501_42339634_+
GO:0097352	autophagosome maturation	biological_process	1	46	13	6636	0.003492968	0.009772234	11.09698997	circRNA_6692|Chr8:96029825_96046465_-
GO:0005614	interstitial matrix	cellular_component	1	46	14	6636	0.004057199	0.010557443	10.30434783	circRNA_0212|Chr1:104785950_104795565_+
GO:1904385	cellular response to angiotensin	biological_process	1	46	14	6636	0.004057199	0.010557443	10.30434783	circRNA_2246|Chr15:33610716_33637119_-
GO:0003382	epithelial cell morphogenesis	biological_process	1	46	14	6636	0.004057199	0.010557443	10.30434783	circRNA_2512|Chr16:50437205_50487053_-
GO:0070742	C2H2 zinc finger domain binding	molecular_function	1	46	14	6636	0.004057199	0.010557443	10.30434783	circRNA_3048|Chr18:65825830_65841509_+
GO:2001259	positive regulation of cation channel activity	biological_process	1	46	14	6636	0.004057199	0.010557443	10.30434783	circRNA_3949|Chr20:20259263_20276110_+
GO:0005313	L-glutamate transmembrane transporter activity	molecular_function	1	46	14	6636	0.004057199	0.010557443	10.30434783	circRNA_4612|Chr4:31220330_31320090_+
GO:0015183	L-aspartate transmembrane transporter activity	molecular_function	1	46	14	6636	0.004057199	0.010557443	10.30434783	circRNA_4612|Chr4:31220330_31320090_+
GO:0015810	aspartate transmembrane transport	biological_process	1	46	14	6636	0.004057199	0.010557443	10.30434783	circRNA_4612|Chr4:31220330_31320090_+
GO:0043490	malate-aspartate shuttle	biological_process	1	46	14	6636	0.004057199	0.010557443	10.30434783	circRNA_4612|Chr4:31220330_31320090_+
GO:0005975	carbohydrate metabolic process	biological_process	1	46	14	6636	0.004057199	0.010557443	10.30434783	circRNA_5485|Chr5:167014847_167016955_-
GO:0035459	cargo loading into vesicle	biological_process	1	46	14	6636	0.004057199	0.010557443	10.30434783	circRNA_5784|Chr6:80235400_80248440_+
GO:0045740	positive regulation of DNA replication	biological_process	1	46	14	6636	0.004057199	0.010557443	10.30434783	circRNA_6087|Chr7:42328501_42339634_+
GO:0071203	WASH complex	cellular_component	1	46	14	6636	0.004057199	0.010557443	10.30434783	circRNA_6735|Chr8:112777013_112778440_-
GO:0003725	double-stranded RNA binding	molecular_function	2	46	48	6636	0.004335517	0.011221337	6.010869565	circRNA_1603|Chr12:41157218_41200958_+; circRNA_5382|Chr5:144539229_144547479_-
GO:0030676	Rac guanyl-nucleotide exchange factor activity	molecular_function	2	46	49	6636	0.004596033	0.011450887	5.888198758	circRNA_5020|Chr5:7725207_7780390_-; circRNA_5027|Chr5:7763385_7798747_-
GO:0045671	negative regulation of osteoclast differentiation	biological_process	1	46	15	6636	0.004660795	0.011450887	9.617391304	circRNA_3154|Chr19:29642344_29645344_-
GO:0033270	paranode region of axon	cellular_component	1	46	15	6636	0.004660795	0.011450887	9.617391304	circRNA_3949|Chr20:20259263_20276110_+
GO:0004675	transmembrane receptor protein serine/threonine kinase activity	molecular_function	1	46	15	6636	0.004660795	0.011450887	9.617391304	circRNA_4178|Chr3:44500847_44522988_-
GO:0004702	signal transducer, downstream of receptor, with serine/threonine kinase activity	molecular_function	1	46	15	6636	0.004660795	0.011450887	9.617391304	circRNA_4178|Chr3:44500847_44522988_-
GO:0051145	smooth muscle cell differentiation	biological_process	1	46	15	6636	0.004660795	0.011450887	9.617391304	circRNA_4178|Chr3:44500847_44522988_-
GO:0008045	motor neuron axon guidance	biological_process	1	46	15	6636	0.004660795	0.011450887	9.617391304	circRNA_4225|Chr3:60610877_60624155_-
GO:0015813	L-glutamate transmembrane transport	biological_process	1	46	15	6636	0.004660795	0.011450887	9.617391304	circRNA_4612|Chr4:31220330_31320090_+
GO:0045333	cellular respiration	biological_process	1	46	15	6636	0.004660795	0.011450887	9.617391304	circRNA_4612|Chr4:31220330_31320090_+
GO:0008544	epidermis development	biological_process	1	46	15	6636	0.004660795	0.011450887	9.617391304	circRNA_6825|Chr9:2205172_2246426_+
GO:0008584	male gonad development	biological_process	2	46	50	6636	0.004865861	0.011894328	5.770434783	circRNA_5382|Chr5:144539229_144547479_-; circRNA_6087|Chr7:42328501_42339634_+
GO:0051481	negative regulation of cytosolic calcium ion concentration	biological_process	1	46	16	6636	0.005303207	0.012706694	9.016304348	circRNA_1551|Chr12:25431687_25435591_+
GO:0007498	mesoderm development	biological_process	1	46	16	6636	0.005303207	0.012706694	9.016304348	circRNA_4178|Chr3:44500847_44522988_-
GO:0031054	pre-miRNA processing	biological_process	1	46	16	6636	0.005303207	0.012706694	9.016304348	circRNA_5382|Chr5:144539229_144547479_-
GO:0034067	protein localization to Golgi apparatus	biological_process	1	46	16	6636	0.005303207	0.012706694	9.016304348	circRNA_6060|Chr7:29284390_29288495_+
GO:0032007	negative regulation of TOR signaling	biological_process	2	46	53	6636	0.005732158	0.013666821	5.443806399	circRNA_5020|Chr5:7725207_7780390_-; circRNA_5027|Chr5:7763385_7798747_-
GO:0042711	maternal behavior	biological_process	1	46	17	6636	0.005983892	0.013991323	8.485933504	circRNA_3048|Chr18:65825830_65841509_+
GO:0007009	plasma membrane organization	biological_process	1	46	17	6636	0.005983892	0.013991323	8.485933504	circRNA_3949|Chr20:20259263_20276110_+
GO:0003181	atrioventricular valve morphogenesis	biological_process	1	46	17	6636	0.005983892	0.013991323	8.485933504	circRNA_4178|Chr3:44500847_44522988_-
GO:0046875	ephrin receptor binding	molecular_function	1	46	17	6636	0.005983892	0.013991323	8.485933504	circRNA_4225|Chr3:60610877_60624155_-
GO:0014065	phosphatidylinositol 3-kinase signaling	biological_process	2	46	56	6636	0.006685502	0.015229668	5.152173913	circRNA_5020|Chr5:7725207_7780390_-; circRNA_5027|Chr5:7763385_7798747_-
GO:0014883	transition between fast and slow fiber	biological_process	1	46	18	6636	0.006702312	0.015229668	8.014492754	circRNA_2246|Chr15:33610716_33637119_-
GO:0000792	heterochromatin	cellular_component	1	46	18	6636	0.006702312	0.015229668	8.014492754	circRNA_3048|Chr18:65825830_65841509_+
GO:0051896	regulation of protein kinase B signaling	biological_process	1	46	18	6636	0.006702312	0.015229668	8.014492754	circRNA_3154|Chr19:29642344_29645344_-
GO:0060412	ventricular septum morphogenesis	biological_process	1	46	18	6636	0.006702312	0.015229668	8.014492754	circRNA_4178|Chr3:44500847_44522988_-
GO:0015485	cholesterol binding	molecular_function	1	46	18	6636	0.006702312	0.015229668	8.014492754	circRNA_4510|Chr3:175512077_175516165_+
GO:0002026	regulation of the force of heart contraction	biological_process	1	46	19	6636	0.007457935	0.0167113	7.592677346	circRNA_2246|Chr15:33610716_33637119_-
GO:0036092	phosphatidylinositol-3-phosphate biosynthetic process	biological_process	1	46	19	6636	0.007457935	0.0167113	7.592677346	circRNA_3154|Chr19:29642344_29645344_-
GO:0050431	transforming growth factor beta binding	molecular_function	1	46	19	6636	0.007457935	0.0167113	7.592677346	circRNA_4178|Chr3:44500847_44522988_-
GO:0030017	sarcomere	cellular_component	1	46	20	6636	0.008250234	0.018068385	7.213043478	circRNA_2246|Chr15:33610716_33637119_-
GO:0007281	germ cell development	biological_process	1	46	20	6636	0.008250234	0.018068385	7.213043478	circRNA_4178|Chr3:44500847_44522988_-
GO:0030278	regulation of ossification	biological_process	1	46	20	6636	0.008250234	0.018068385	7.213043478	circRNA_4178|Chr3:44500847_44522988_-
GO:0035278	miRNA mediated inhibition of translation	biological_process	1	46	20	6636	0.008250234	0.018068385	7.213043478	circRNA_5382|Chr5:144539229_144547479_-
GO:0006006	glucose metabolic process	biological_process	1	46	20	6636	0.008250234	0.018068385	7.213043478	circRNA_5485|Chr5:167014847_167016955_-
GO:0006513	protein monoubiquitination	biological_process	1	46	21	6636	0.009078685	0.019529261	6.869565217	circRNA_2171|Chr14:110683107_110709166_+
GO:0014898	cardiac muscle hypertrophy in response to stress	biological_process	1	46	21	6636	0.009078685	0.019529261	6.869565217	circRNA_2246|Chr15:33610716_33637119_-
GO:0009967	positive regulation of signal transduction	biological_process	1	46	21	6636	0.009078685	0.019529261	6.869565217	circRNA_4461|Chr3:152966158_152973518_-
GO:1902004	positive regulation of amyloid-beta formation	biological_process	1	46	21	6636	0.009078685	0.019529261	6.869565217	circRNA_4559|Chr4:10437864_10452881_-
GO:0016605	PML body	cellular_component	2	46	64	6636	0.009668944	0.020653658	4.508152174	circRNA_6536|Chr8:67801800_67812158_-; circRNA_6825|Chr9:2205172_2246426_+
GO:0006936	muscle contraction	biological_process	1	46	22	6636	0.009942773	0.020653658	6.557312253	circRNA_2246|Chr15:33610716_33637119_-
GO:0016311	dephosphorylation	biological_process	1	46	22	6636	0.009942773	0.020653658	6.557312253	circRNA_3154|Chr19:29642344_29645344_-
GO:0004252	serine-type endopeptidase activity	molecular_function	1	46	22	6636	0.009942773	0.020653658	6.557312253	circRNA_3235|Chr19:43899905_43908769_-
GO:0071773	cellular response to BMP stimulus	biological_process	1	46	22	6636	0.009942773	0.020653658	6.557312253	circRNA_4178|Chr3:44500847_44522988_-
GO:0005070	SH3/SH2 adaptor activity	molecular_function	1	46	22	6636	0.009942773	0.020653658	6.557312253	circRNA_4461|Chr3:152966158_152973518_-
GO:0003743	translation initiation factor activity	molecular_function	1	46	22	6636	0.009942773	0.020653658	6.557312253	circRNA_5382|Chr5:144539229_144547479_-
GO:0010501	RNA secondary structure unwinding	biological_process	1	46	22	6636	0.009942773	0.020653658	6.557312253	circRNA_5382|Chr5:144539229_144547479_-
GO:0010765	positive regulation of sodium ion transport	biological_process	1	46	23	6636	0.010841987	0.022235261	6.27221172	circRNA_3949|Chr20:20259263_20276110_+
GO:0010862	positive regulation of pathway-restricted SMAD protein phosphorylation	biological_process	1	46	23	6636	0.010841987	0.022235261	6.27221172	circRNA_4178|Chr3:44500847_44522988_-
GO:0008083	growth factor activity	molecular_function	1	46	23	6636	0.010841987	0.022235261	6.27221172	circRNA_6087|Chr7:42328501_42339634_+
GO:0006469	negative regulation of protein kinase activity	biological_process	2	46	67	6636	0.010958123	0.022378613	4.306294614	circRNA_5020|Chr5:7725207_7780390_-; circRNA_5027|Chr5:7763385_7798747_-
GO:0007608	sensory perception of smell	biological_process	1	46	24	6636	0.011775818	0.023454716	6.010869565	circRNA_0212|Chr1:104785950_104795565_+
GO:0002027	regulation of heart rate	biological_process	1	46	24	6636	0.011775818	0.023454716	6.010869565	circRNA_2246|Chr15:33610716_33637119_-
GO:0007512	adult heart development	biological_process	1	46	24	6636	0.011775818	0.023454716	6.010869565	circRNA_2246|Chr15:33610716_33637119_-
GO:0007156	homophilic cell adhesion via plasma membrane adhesion molecules	biological_process	1	46	24	6636	0.011775818	0.023454716	6.010869565	circRNA_2512|Chr16:50437205_50487053_-
GO:0007032	endosome organization	biological_process	1	46	24	6636	0.011775818	0.023454716	6.010869565	circRNA_6735|Chr8:112777013_112778440_-
GO:0001227	transcriptional repressor activity, RNA polymerase II transcription regulatory region sequence-specific DNA binding	molecular_function	1	46	24	6636	0.011775818	0.023454716	6.010869565	circRNA_6825|Chr9:2205172_2246426_+
GO:0030016	myofibril	cellular_component	1	46	25	6636	0.012743767	0.024771016	5.770434783	circRNA_2246|Chr15:33610716_33637119_-
GO:0007369	gastrulation	biological_process	1	46	25	6636	0.012743767	0.024771016	5.770434783	circRNA_4178|Chr3:44500847_44522988_-
GO:0006839	mitochondrial transport	biological_process	1	46	25	6636	0.012743767	0.024771016	5.770434783	circRNA_4612|Chr4:31220330_31320090_+
GO:0022857	transmembrane transporter activity	molecular_function	1	46	25	6636	0.012743767	0.024771016	5.770434783	circRNA_4612|Chr4:31220330_31320090_+
GO:0035196	production of miRNAs involved in gene silencing by miRNA	biological_process	1	46	25	6636	0.012743767	0.024771016	5.770434783	circRNA_5382|Chr5:144539229_144547479_-
GO:0010469	regulation of signaling receptor activity	biological_process	1	46	25	6636	0.012743767	0.024771016	5.770434783	circRNA_6087|Chr7:42328501_42339634_+
GO:0048813	dendrite morphogenesis	biological_process	2	46	72	6636	0.013318802	0.025785201	4.007246377	circRNA_5020|Chr5:7725207_7780390_-; circRNA_5027|Chr5:7763385_7798747_-
GO:0060048	cardiac muscle contraction	biological_process	1	46	26	6636	0.013745335	0.026089186	5.548494983	circRNA_2246|Chr15:33610716_33637119_-
GO:0050808	synapse organization	biological_process	1	46	26	6636	0.013745335	0.026089186	5.548494983	circRNA_3949|Chr20:20259263_20276110_+
GO:0003727	single-stranded RNA binding	molecular_function	1	46	26	6636	0.013745335	0.026089186	5.548494983	circRNA_5382|Chr5:144539229_144547479_-
GO:0006413	translational initiation	biological_process	1	46	26	6636	0.013745335	0.026089186	5.548494983	circRNA_5382|Chr5:144539229_144547479_-
GO:0080025	phosphatidylinositol-3,5-bisphosphate binding	molecular_function	1	46	26	6636	0.013745335	0.026089186	5.548494983	circRNA_6692|Chr8:96029825_96046465_-
GO:0043087	regulation of GTPase activity	biological_process	2	46	74	6636	0.01433824	0.027108234	3.898942421	circRNA_4126|Chr3:21721366_21736929_+; circRNA_4225|Chr3:60610877_60624155_-
GO:0001540	amyloid-beta binding	molecular_function	1	46	27	6636	0.014780034	0.027834771	5.342995169	circRNA_4559|Chr4:10437864_10452881_-
GO:0005770	late endosome	cellular_component	2	46	75	6636	0.014864202	0.027884783	3.846956522	circRNA_4461|Chr3:152966158_152973518_-; circRNA_6692|Chr8:96029825_96046465_-
GO:0051019	mitogen-activated protein kinase binding	molecular_function	1	46	28	6636	0.015847374	0.029275302	5.152173913	circRNA_1551|Chr12:25431687_25435591_+
GO:0009636	response to toxic substance	biological_process	1	46	28	6636	0.015847374	0.029275302	5.152173913	circRNA_3235|Chr19:43899905_43908769_-
GO:0009306	protein secretion	biological_process	1	46	28	6636	0.015847374	0.029275302	5.152173913	circRNA_5784|Chr6:80235400_80248440_+
GO:0001541	ovarian follicle development	biological_process	1	46	28	6636	0.015847374	0.029275302	5.152173913	circRNA_6087|Chr7:42328501_42339634_+
GO:0008344	adult locomotory behavior	biological_process	2	46	77	6636	0.01594876	0.029350569	3.747035573	circRNA_5020|Chr5:7725207_7780390_-; circRNA_5027|Chr5:7763385_7798747_-
GO:0001569	branching involved in blood vessel morphogenesis	biological_process	1	46	29	6636	0.016946876	0.030835668	4.974512744	circRNA_4178|Chr3:44500847_44522988_-
GO:0016571	histone methylation	biological_process	1	46	29	6636	0.016946876	0.030835668	4.974512744	circRNA_6825|Chr9:2205172_2246426_+
GO:0051262	protein tetramerization	biological_process	1	46	29	6636	0.016946876	0.030835668	4.974512744	circRNA_6844|Chr9:11209034_11219449_-
GO:0003723	RNA binding	molecular_function	4	46	221	6636	0.017682203	0.032053133	2.611056463	circRNA_3342|Chr2:25786589_25787923_-; circRNA_3346|Chr2:25924932_25927179_-; circRNA_3425|Chr2:52310449_52313280_+; circRNA_5382|Chr5:144539229_144547479_-
GO:0030100	regulation of endocytosis	biological_process	1	46	30	6636	0.018078061	0.032287017	4.808695652	circRNA_2836|Chr17:87758882_87771508_-
GO:0006874	cellular calcium ion homeostasis	biological_process	1	46	30	6636	0.018078061	0.032287017	4.808695652	circRNA_3154|Chr19:29642344_29645344_-
GO:0030507	spectrin binding	molecular_function	1	46	30	6636	0.018078061	0.032287017	4.808695652	circRNA_3949|Chr20:20259263_20276110_+
GO:0043034	costamere	cellular_component	1	46	30	6636	0.018078061	0.032287017	4.808695652	circRNA_3949|Chr20:20259263_20276110_+
GO:0005089	Rho guanyl-nucleotide exchange factor activity	molecular_function	2	46	82	6636	0.018851599	0.033544757	3.518557794	circRNA_3342|Chr2:25786589_25787923_-; circRNA_3346|Chr2:25924932_25927179_-
GO:0034097	response to cytokine	biological_process	1	46	31	6636	0.019240459	0.033740515	4.653576438	circRNA_3235|Chr19:43899905_43908769_-
GO:0019838	growth factor binding	molecular_function	1	46	31	6636	0.019240459	0.033740515	4.653576438	circRNA_4178|Chr3:44500847_44522988_-
GO:2001237	negative regulation of extrinsic apoptotic signaling pathway	biological_process	1	46	31	6636	0.019240459	0.033740515	4.653576438	circRNA_4178|Chr3:44500847_44522988_-
GO:0035198	miRNA binding	molecular_function	1	46	31	6636	0.019240459	0.033740515	4.653576438	circRNA_5382|Chr5:144539229_144547479_-
GO:0045087	innate immune response	biological_process	2	46	84	6636	0.020089699	0.035102579	3.434782609	circRNA_2941|Chr18:29409770_29412096_+; circRNA_4461|Chr3:152966158_152973518_-
GO:0030509	BMP signaling pathway	biological_process	1	46	32	6636	0.020433602	0.035575048	4.508152174	circRNA_4178|Chr3:44500847_44522988_-
GO:0001702	gastrulation with mouth forming second	biological_process	1	46	33	6636	0.021657027	0.037569897	4.371541502	circRNA_4178|Chr3:44500847_44522988_-
GO:0043001	Golgi to plasma membrane protein transport	biological_process	1	46	34	6636	0.022910278	0.039321186	4.242966752	circRNA_3949|Chr20:20259263_20276110_+
GO:0042632	cholesterol homeostasis	biological_process	1	46	34	6636	0.022910278	0.039321186	4.242966752	circRNA_5784|Chr6:80235400_80248440_+
GO:0030010	establishment of cell polarity	biological_process	1	46	34	6636	0.022910278	0.039321186	4.242966752	circRNA_5975|Chr6:136059672_136084622_+
GO:0005096	GTPase activator activity	molecular_function	5	46	324	6636	0.023306539	0.039859946	2.226247987	circRNA_2836|Chr17:87758882_87771508_-; circRNA_4126|Chr3:21721366_21736929_+; circRNA_4225|Chr3:60610877_60624155_-; circRNA_5020|Chr5:7725207_7780390_-; circRNA_5027|Chr5:7763385_7798747_-
GO:0003148	outflow tract septum morphogenesis	biological_process	1	46	35	6636	0.0241929	0.040799176	4.12173913	circRNA_4178|Chr3:44500847_44522988_-
GO:0007368	determination of left/right symmetry	biological_process	1	46	35	6636	0.0241929	0.040799176	4.12173913	circRNA_4178|Chr3:44500847_44522988_-
GO:0030501	positive regulation of bone mineralization	biological_process	1	46	35	6636	0.0241929	0.040799176	4.12173913	circRNA_4178|Chr3:44500847_44522988_-
GO:0048013	ephrin receptor signaling pathway	biological_process	1	46	35	6636	0.0241929	0.040799176	4.12173913	circRNA_4225|Chr3:60610877_60624155_-
GO:0051607	defense response to virus	biological_process	1	46	36	6636	0.025504445	0.042274491	4.007246377	circRNA_1603|Chr12:41157218_41200958_+
GO:0009925	basal plasma membrane	cellular_component	1	46	36	6636	0.025504445	0.042274491	4.007246377	circRNA_3949|Chr20:20259263_20276110_+
GO:0016529	sarcoplasmic reticulum	cellular_component	1	46	36	6636	0.025504445	0.042274491	4.007246377	circRNA_3949|Chr20:20259263_20276110_+
GO:0001707	mesoderm formation	biological_process	1	46	36	6636	0.025504445	0.042274491	4.007246377	circRNA_4178|Chr3:44500847_44522988_-
GO:0038083	peptidyl-tyrosine autophosphorylation	biological_process	1	46	36	6636	0.025504445	0.042274491	4.007246377	circRNA_4461|Chr3:152966158_152973518_-
GO:0007163	establishment or maintenance of cell polarity	biological_process	1	46	37	6636	0.026844469	0.044343765	3.898942421	circRNA_2512|Chr16:50437205_50487053_-
GO:0030018	Z disc	cellular_component	2	46	97	6636	0.029214547	0.047927659	2.974450919	circRNA_2246|Chr15:33610716_33637119_-; circRNA_3949|Chr20:20259263_20276110_+
GO:0007030	Golgi organization	biological_process	2	46	97	6636	0.029214547	0.047927659	2.974450919	circRNA_2836|Chr17:87758882_87771508_-; circRNA_6060|Chr7:29284390_29288495_+
GO:0000118	histone deacetylase complex	cellular_component	1	46	39	6636	0.029608203	0.047927659	3.698996656	circRNA_3048|Chr18:65825830_65841509_+
GO:0071407	cellular response to organic cyclic compound	biological_process	1	46	39	6636	0.029608203	0.047927659	3.698996656	circRNA_3048|Chr18:65825830_65841509_+
GO:0008289	lipid binding	molecular_function	1	46	39	6636	0.029608203	0.047927659	3.698996656	circRNA_3154|Chr19:29642344_29645344_-
GO:0007528	neuromuscular junction development	biological_process	1	46	39	6636	0.029608203	0.047927659	3.698996656	circRNA_3949|Chr20:20259263_20276110_+
GO:0030177	positive regulation of Wnt signaling pathway	biological_process	1	46	40	6636	0.031031047	0.049567744	3.606521739	circRNA_3048|Chr18:65825830_65841509_+
GO:0005200	structural constituent of cytoskeleton	molecular_function	1	46	40	6636	0.031031047	0.049567744	3.606521739	circRNA_3949|Chr20:20259263_20276110_+
GO:0045669	positive regulation of osteoblast differentiation	biological_process	1	46	40	6636	0.031031047	0.049567744	3.606521739	circRNA_4178|Chr3:44500847_44522988_-
GO:0004715	non-membrane spanning protein tyrosine kinase activity	molecular_function	1	46	40	6636	0.031031047	0.049567744	3.606521739	circRNA_4461|Chr3:152966158_152973518_-
GO:0009612	response to mechanical stimulus	biological_process	1	46	41	6636	0.032480639	0.051543046	3.518557794	circRNA_3048|Chr18:65825830_65841509_+
GO:0051056	regulation of small GTPase mediated signal transduction	biological_process	1	46	41	6636	0.032480639	0.051543046	3.518557794	circRNA_4225|Chr3:60610877_60624155_-
GO:0005085	guanyl-nucleotide exchange factor activity	molecular_function	2	46	102	6636	0.033220445	0.052544756	2.828644501	circRNA_3342|Chr2:25786589_25787923_-; circRNA_3346|Chr2:25924932_25927179_-
GO:0016328	lateral plasma membrane	cellular_component	1	46	42	6636	0.033956558	0.053360305	3.434782609	circRNA_3949|Chr20:20259263_20276110_+
GO:0031338	regulation of vesicle fusion	biological_process	1	46	42	6636	0.033956558	0.053360305	3.434782609	circRNA_4126|Chr3:21721366_21736929_+
GO:0000785	chromatin	cellular_component	2	46	104	6636	0.034899482	0.054664561	2.774247492	circRNA_3048|Chr18:65825830_65841509_+; circRNA_6825|Chr9:2205172_2246426_+
GO:0008233	peptidase activity	molecular_function	1	46	43	6636	0.035458386	0.055005958	3.354903943	circRNA_3235|Chr19:43899905_43908769_-
GO:0000281	mitotic cytokinesis	biological_process	1	46	43	6636	0.035458386	0.055005958	3.354903943	circRNA_3949|Chr20:20259263_20276110_+
GO:1902017	regulation of cilium assembly	biological_process	1	46	43	6636	0.035458386	0.055005958	3.354903943	circRNA_4126|Chr3:21721366_21736929_+
GO:0043434	response to peptide hormone	biological_process	1	46	44	6636	0.036985711	0.056292717	3.278656126	circRNA_3235|Chr19:43899905_43908769_-
GO:0006869	lipid transport	biological_process	1	46	44	6636	0.036985711	0.056292717	3.278656126	circRNA_4510|Chr3:175512077_175516165_+
GO:0043406	positive regulation of MAP kinase activity	biological_process	1	46	44	6636	0.036985711	0.056292717	3.278656126	circRNA_6087|Chr7:42328501_42339634_+
GO:0032436	positive regulation of proteasomal ubiquitin-dependent protein catabolic process	biological_process	1	46	44	6636	0.036985711	0.056292717	3.278656126	circRNA_6536|Chr8:67801800_67812158_-
GO:0006898	receptor-mediated endocytosis	biological_process	1	46	44	6636	0.036985711	0.056292717	3.278656126	circRNA_6735|Chr8:112777013_112778440_-
GO:0032580	Golgi cisterna membrane	cellular_component	1	46	44	6636	0.036985711	0.056292717	3.278656126	circRNA_6844|Chr9:11209034_11219449_-
GO:0008201	heparin binding	molecular_function	1	46	45	6636	0.038538123	0.057747528	3.205797101	circRNA_0212|Chr1:104785950_104795565_+
GO:0016459	myosin complex	cellular_component	1	46	45	6636	0.038538123	0.057747528	3.205797101	circRNA_2246|Chr15:33610716_33637119_-
GO:0045727	positive regulation of translation	biological_process	1	46	45	6636	0.038538123	0.057747528	3.205797101	circRNA_3425|Chr2:52310449_52313280_+
GO:0008542	visual learning	biological_process	1	46	45	6636	0.038538123	0.057747528	3.205797101	circRNA_6536|Chr8:67801800_67812158_-
GO:0010008	endosome membrane	cellular_component	1	46	45	6636	0.038538123	0.057747528	3.205797101	circRNA_6735|Chr8:112777013_112778440_-
GO:0031667	response to nutrient levels	biological_process	1	46	46	6636	0.040115218	0.059014485	3.13610586	circRNA_3048|Chr18:65825830_65841509_+
GO:0030315	T-tubule	cellular_component	1	46	46	6636	0.040115218	0.059014485	3.13610586	circRNA_3949|Chr20:20259263_20276110_+
GO:0051592	response to calcium ion	biological_process	1	46	46	6636	0.040115218	0.059014485	3.13610586	circRNA_4612|Chr4:31220330_31320090_+
GO:0048286	lung alveolus development	biological_process	1	46	46	6636	0.040115218	0.059014485	3.13610586	circRNA_4627|Chr4:38263240_38271681_+
GO:0002244	hematopoietic progenitor cell differentiation	biological_process	1	46	46	6636	0.040115218	0.059014485	3.13610586	circRNA_4758|Chr4:88610656_88627387_-
GO:0006325	chromatin organization	biological_process	1	46	46	6636	0.040115218	0.059014485	3.13610586	circRNA_6825|Chr9:2205172_2246426_+
GO:0042995	cell projection	cellular_component	1	46	47	6636	0.041716596	0.060271142	3.069380204	circRNA_1551|Chr12:25431687_25435591_+
GO:0007584	response to nutrient	biological_process	1	46	47	6636	0.041716596	0.060271142	3.069380204	circRNA_3235|Chr19:43899905_43908769_-
GO:0018107	peptidyl-threonine phosphorylation	biological_process	1	46	47	6636	0.041716596	0.060271142	3.069380204	circRNA_4178|Chr3:44500847_44522988_-
GO:0046332	SMAD binding	molecular_function	1	46	47	6636	0.041716596	0.060271142	3.069380204	circRNA_4178|Chr3:44500847_44522988_-
GO:0050731	positive regulation of peptidyl-tyrosine phosphorylation	biological_process	1	46	47	6636	0.041716596	0.060271142	3.069380204	circRNA_6087|Chr7:42328501_42339634_+
GO:0031901	early endosome membrane	cellular_component	1	46	47	6636	0.041716596	0.060271142	3.069380204	circRNA_6735|Chr8:112777013_112778440_-
GO:0007568	aging	biological_process	2	46	115	6636	0.044907918	0.064234394	2.508884688	circRNA_2246|Chr15:33610716_33637119_-; circRNA_3048|Chr18:65825830_65841509_+
GO:0007411	axon guidance	biological_process	1	46	49	6636	0.044990619	0.064234394	2.944099379	circRNA_3949|Chr20:20259263_20276110_+
GO:0030674	protein binding, bridging	molecular_function	1	46	49	6636	0.044990619	0.064234394	2.944099379	circRNA_3949|Chr20:20259263_20276110_+
GO:0022604	regulation of cell morphogenesis	biological_process	1	46	49	6636	0.044990619	0.064234394	2.944099379	circRNA_5382|Chr5:144539229_144547479_-
GO:0019904	protein domain specific binding	molecular_function	3	46	197	6636	0.046640019	0.065844438	2.196866034	circRNA_3048|Chr18:65825830_65841509_+; circRNA_6060|Chr7:29284390_29288495_+; circRNA_6536|Chr8:67801800_67812158_-
GO:0007605	sensory perception of sound	biological_process	1	46	50	6636	0.046662484	0.065844438	2.885217391	circRNA_0212|Chr1:104785950_104795565_+
GO:0008092	cytoskeletal protein binding	molecular_function	1	46	50	6636	0.046662484	0.065844438	2.885217391	circRNA_3949|Chr20:20259263_20276110_+
GO:0031594	neuromuscular junction	cellular_component	1	46	50	6636	0.046662484	0.065844438	2.885217391	circRNA_3949|Chr20:20259263_20276110_+
GO:0014704	intercalated disc	cellular_component	1	46	51	6636	0.048357071	0.068037274	2.828644501	circRNA_3949|Chr20:20259263_20276110_+
GO:0007015	actin filament organization	biological_process	1	46	52	6636	0.050074001	0.070045712	2.774247492	circRNA_2512|Chr16:50437205_50487053_-
GO:0007179	transforming growth factor beta receptor signaling pathway	biological_process	1	46	52	6636	0.050074001	0.070045712	2.774247492	circRNA_4178|Chr3:44500847_44522988_-
GO:0005802	trans-Golgi network	cellular_component	2	46	122	6636	0.051946231	0.072455262	2.364932288	circRNA_4559|Chr4:10437864_10452881_-; circRNA_6060|Chr7:29284390_29288495_+
GO:0006888	ER to Golgi vesicle-mediated transport	biological_process	1	46	54	6636	0.053573386	0.074510112	2.671497585	circRNA_5784|Chr6:80235400_80248440_+
GO:0016604	nuclear body	cellular_component	3	46	208	6636	0.054977106	0.076243321	2.080685619	circRNA_2171|Chr14:110683107_110709166_+; circRNA_5382|Chr5:144539229_144547479_-; circRNA_6825|Chr9:2205172_2246426_+
GO:0044325	ion channel binding	molecular_function	1	46	55	6636	0.055355102	0.076330113	2.622924901	circRNA_3949|Chr20:20259263_20276110_+
GO:0045444	fat cell differentiation	biological_process	1	46	55	6636	0.055355102	0.076330113	2.622924901	circRNA_6536|Chr8:67801800_67812158_-
GO:0045184	establishment of protein localization	biological_process	1	46	56	6636	0.05715768	0.07836917	2.576086957	circRNA_3949|Chr20:20259263_20276110_+
GO:0031234	extrinsic component of cytoplasmic side of plasma membrane	cellular_component	1	46	56	6636	0.05715768	0.07836917	2.576086957	circRNA_4461|Chr3:152966158_152973518_-
GO:0016525	negative regulation of angiogenesis	biological_process	1	46	57	6636	0.058980759	0.080413204	2.530892449	circRNA_1551|Chr12:25431687_25435591_+
GO:0048568	embryonic organ development	biological_process	1	46	57	6636	0.058980759	0.080413204	2.530892449	circRNA_3048|Chr18:65825830_65841509_+
GO:0007626	locomotory behavior	biological_process	1	46	58	6636	0.060823983	0.082461646	2.487256372	circRNA_0212|Chr1:104785950_104795565_+
GO:0000932	P-body	cellular_component	1	46	58	6636	0.060823983	0.082461646	2.487256372	circRNA_5382|Chr5:144539229_144547479_-
GO:0000122	negative regulation of transcription by RNA polymerase II	biological_process	5	46	413	6636	0.063762411	0.08620393	1.746499632	circRNA_3048|Chr18:65825830_65841509_+; circRNA_4461|Chr3:152966158_152973518_-; circRNA_4627|Chr4:38263240_38271681_+; circRNA_6536|Chr8:67801800_67812158_-; circRNA_6825|Chr9:2205172_2246426_+
GO:0007409	axonogenesis	biological_process	1	46	60	6636	0.064569456	0.087051857	2.404347826	circRNA_3949|Chr20:20259263_20276110_+
GO:0030246	carbohydrate binding	molecular_function	1	46	61	6636	0.066471011	0.089366581	2.364932288	circRNA_5485|Chr5:167014847_167016955_-
GO:0009968	negative regulation of signal transduction	biological_process	1	46	62	6636	0.068391321	0.091693627	2.326788219	circRNA_4178|Chr3:44500847_44522988_-
GO:0047485	protein N-terminus binding	molecular_function	1	46	63	6636	0.070330048	0.09403244	2.289855072	circRNA_4461|Chr3:152966158_152973518_-
GO:0030027	lamellipodium	cellular_component	2	46	139	6636	0.071113752	0.094818336	2.075695965	circRNA_2512|Chr16:50437205_50487053_-; circRNA_6087|Chr7:42328501_42339634_+
GO:0003729	mRNA binding	molecular_function	1	46	65	6636	0.07426142	0.098472677	2.219397993	circRNA_3048|Chr18:65825830_65841509_+
GO:0007169	transmembrane receptor protein tyrosine kinase signaling pathway	biological_process	1	46	65	6636	0.07426142	0.098472677	2.219397993	circRNA_4461|Chr3:152966158_152973518_-
GO:0007186	G-protein coupled receptor signaling pathway	biological_process	2	46	143	6636	0.076032318	0.100545469	2.017634539	circRNA_5020|Chr5:7725207_7780390_-; circRNA_5027|Chr5:7763385_7798747_-
GO:0005923	bicellular tight junction	cellular_component	1	46	68	6636	0.080288356	0.105884371	2.121483376	circRNA_3949|Chr20:20259263_20276110_+
GO:0005743	mitochondrial inner membrane	cellular_component	1	46	69	6636	0.082330684	0.108038752	2.09073724	circRNA_4612|Chr4:31220330_31320090_+
GO:0005794	Golgi apparatus	cellular_component	6	46	550	6636	0.082368388	0.108038752	1.573754941	circRNA_2836|Chr17:87758882_87771508_-; circRNA_3154|Chr19:29642344_29645344_-; circRNA_3753|Chr2:218919131_218929338_-; circRNA_4461|Chr3:152966158_152973518_-; circRNA_6060|Chr7:29284390_29288495_+; circRNA_6844|Chr9:11209034_11219449_-
GO:0098609	cell-cell adhesion	biological_process	1	46	70	6636	0.084389161	0.110092598	2.060869565	circRNA_2512|Chr16:50437205_50487053_-
GO:0016363	nuclear matrix	cellular_component	1	46	70	6636	0.084389161	0.110092598	2.060869565	circRNA_6825|Chr9:2205172_2246426_+
GO:0005102	signaling receptor binding	molecular_function	2	46	150	6636	0.084995178	0.110585124	1.923478261	circRNA_3871|Chr20:3196267_3282058_+; circRNA_4461|Chr3:152966158_152973518_-
GO:0007165	signal transduction	biological_process	4	46	345	6636	0.088688552	0.115081123	1.672589792	circRNA_2836|Chr17:87758882_87771508_-; circRNA_3154|Chr19:29642344_29645344_-; circRNA_3949|Chr20:20259263_20276110_+; circRNA_4225|Chr3:60610877_60624155_-
GO:0042147	retrograde transport, endosome to Golgi	biological_process	1	46	73	6636	0.090658401	0.117322637	1.976176295	circRNA_6060|Chr7:29284390_29288495_+
GO:0043231	intracellular membrane-bounded organelle	cellular_component	5	46	454	6636	0.091405393	0.117973894	1.588776097	circRNA_2171|Chr14:110683107_110709166_+; circRNA_4461|Chr3:152966158_152973518_-; circRNA_5485|Chr5:167014847_167016955_-; circRNA_5590|Chr6:12179226_12194014_+; circRNA_6735|Chr8:112777013_112778440_-
GO:0032355	response to estradiol	biological_process	1	46	75	6636	0.094913041	0.122175298	1.923478261	circRNA_3048|Chr18:65825830_65841509_+
GO:0005886	plasma membrane	cellular_component	12	46	1296	6636	0.098189728	0.1260579	1.335748792	circRNA_2161|Chr14:106916021_106930939_-; circRNA_2512|Chr16:50437205_50487053_-; circRNA_2836|Chr17:87758882_87771508_-; circRNA_3342|Chr2:25786589_25787923_-; circRNA_3346|Chr2:25924932_25927179_-; circRNA_3871|Chr20:3196267_3282058_+; circRNA_3949|Chr20:20259263_20276110_+; circRNA_4461|Chr3:152966158_152973518_-; circRNA_5020|Chr5:7725207_7780390_-; circRNA_5027|Chr5:7763385_7798747_-; circRN…
GO:0003777	microtubule motor activity	molecular_function	1	46	78	6636	0.101401814	0.129837244	1.849498328	circRNA_2246|Chr15:33610716_33637119_-
GO:0043547	positive regulation of GTPase activity	biological_process	4	46	362	6636	0.103665389	0.132385352	1.594042758	circRNA_2836|Chr17:87758882_87771508_-; circRNA_4225|Chr3:60610877_60624155_-; circRNA_5020|Chr5:7725207_7780390_-; circRNA_5027|Chr5:7763385_7798747_-
GO:0003924	GTPase activity	molecular_function	1	46	80	6636	0.105795519	0.134750082	1.80326087	circRNA_6060|Chr7:29284390_29288495_+
GO:0005622	intracellular	cellular_component	4	46	365	6636	0.106434993	0.135208758	1.580941036	circRNA_4126|Chr3:21721366_21736929_+; circRNA_4225|Chr3:60610877_60624155_-; circRNA_5020|Chr5:7725207_7780390_-; circRNA_5027|Chr5:7763385_7798747_-
GO:0001725	stress fiber	cellular_component	1	46	81	6636	0.108011884	0.136852754	1.78099839	circRNA_2246|Chr15:33610716_33637119_-
GO:0005578	proteinaceous extracellular matrix	cellular_component	1	46	82	6636	0.110240892	0.138588549	1.759278897	circRNA_0212|Chr1:104785950_104795565_+
GO:0006281	DNA repair	biological_process	1	46	82	6636	0.110240892	0.138588549	1.759278897	circRNA_2171|Chr14:110683107_110709166_+
GO:0012505	endomembrane system	cellular_component	1	46	82	6636	0.110240892	0.138588549	1.759278897	circRNA_4126|Chr3:21721366_21736929_+
GO:0043066	negative regulation of apoptotic process	biological_process	3	46	266	6636	0.111211885	0.139392408	1.627002288	circRNA_5382|Chr5:144539229_144547479_-; circRNA_6087|Chr7:42328501_42339634_+; circRNA_6536|Chr8:67801800_67812158_-
GO:0031625	ubiquitin protein ligase binding	molecular_function	2	46	169	6636	0.111456326	0.139392408	1.707229226	circRNA_2171|Chr14:110683107_110709166_+; circRNA_6536|Chr8:67801800_67812158_-
GO:0023014	signal transduction by protein phosphorylation	biological_process	1	46	83	6636	0.112482268	0.140312933	1.738082766	circRNA_4178|Chr3:44500847_44522988_-
GO:0046872	metal ion binding	molecular_function	7	46	711	6636	0.113130178	0.140758371	1.420289855	circRNA_2269|Chr15:38651172_38701205_-; circRNA_3342|Chr2:25786589_25787923_-; circRNA_3346|Chr2:25924932_25927179_-; circRNA_4178|Chr3:44500847_44522988_-; circRNA_4225|Chr3:60610877_60624155_-; circRNA_4627|Chr4:38263240_38271681_+; circRNA_6060|Chr7:29284390_29288495_+
GO:0045177	apical part of cell	cellular_component	1	46	84	6636	0.114735746	0.142390002	1.717391304	circRNA_4178|Chr3:44500847_44522988_-
GO:0006351	transcription, DNA-templated	biological_process	3	46	270	6636	0.115803033	0.143346977	1.602898551	circRNA_1551|Chr12:25431687_25435591_+; circRNA_2269|Chr15:38651172_38701205_-; circRNA_6825|Chr9:2205172_2246426_+
GO:0016021	integral component of membrane	cellular_component	9	46	960	6636	0.118455514	0.146256298	1.352445652	circRNA_1603|Chr12:41157218_41200958_+; circRNA_2512|Chr16:50437205_50487053_-; circRNA_3753|Chr2:218919131_218929338_-; circRNA_3871|Chr20:3196267_3282058_+; circRNA_4612|Chr4:31220330_31320090_+; circRNA_5784|Chr6:80235400_80248440_+; circRNA_6087|Chr7:42328501_42339634_+; circRNA_6692|Chr8:96029825_96046465_-; circRNA_6844|Chr9:11209034_11219449_-
GO:0003700	DNA binding transcription factor activity	molecular_function	3	46	275	6636	0.121660463	0.149831206	1.573754941	circRNA_1551|Chr12:25431687_25435591_+; circRNA_5590|Chr6:12179226_12194014_+; circRNA_6825|Chr9:2205172_2246426_+
GO:0007018	microtubule-based movement	biological_process	1	46	88	6636	0.123865388	0.152159512	1.639328063	circRNA_2246|Chr15:33610716_33637119_-
GO:0090630	activation of GTPase activity	biological_process	1	46	90	6636	0.128496039	0.157448311	1.602898551	circRNA_4126|Chr3:21721366_21736929_+
GO:0014070	response to organic cyclic compound	biological_process	1	46	91	6636	0.130826939	0.159899593	1.585284281	circRNA_3048|Chr18:65825830_65841509_+
GO:0031410	cytoplasmic vesicle	cellular_component	2	46	182	6636	0.131187176	0.159936003	1.585284281	circRNA_3753|Chr2:218919131_218929338_-; circRNA_4461|Chr3:152966158_152973518_-
GO:0072659	protein localization to plasma membrane	biological_process	1	46	92	6636	0.133167895	0.161133153	1.56805293	circRNA_3949|Chr20:20259263_20276110_+
GO:0000226	microtubule cytoskeleton organization	biological_process	1	46	92	6636	0.133167895	0.161133153	1.56805293	circRNA_5975|Chr6:136059672_136084622_+
GO:0006338	chromatin remodeling	biological_process	1	46	92	6636	0.133167895	0.161133153	1.56805293	circRNA_6825|Chr9:2205172_2246426_+
GO:0005635	nuclear envelope	cellular_component	1	46	93	6636	0.135518663	0.163161773	1.551192146	circRNA_2171|Chr14:110683107_110709166_+
GO:0045211	postsynaptic membrane	cellular_component	1	46	93	6636	0.135518663	0.163161773	1.551192146	circRNA_3949|Chr20:20259263_20276110_+
GO:0031982	vesicle	cellular_component	1	46	94	6636	0.137879002	0.165591655	1.534690102	circRNA_3753|Chr2:218919131_218929338_-
GO:0005516	calmodulin binding	molecular_function	1	46	95	6636	0.140248675	0.16802069	1.518535469	circRNA_2246|Chr15:33610716_33637119_-
GO:0007399	nervous system development	biological_process	1	46	97	6636	0.145015088	0.173301982	1.487225459	circRNA_0212|Chr1:104785950_104795565_+
GO:0061630	ubiquitin protein ligase activity	molecular_function	2	46	192	6636	0.147157458	0.175429088	1.502717391	circRNA_2171|Chr14:110683107_110709166_+; circRNA_4758|Chr4:88610656_88627387_-
GO:0000981	RNA polymerase II transcription factor activity, sequence-specific DNA binding	molecular_function	1	46	99	6636	0.149816054	0.178159632	1.457180501	circRNA_1551|Chr12:25431687_25435591_+
GO:0008270	zinc ion binding	molecular_function	4	46	413	6636	0.155594444	0.184577722	1.397199705	circRNA_4916|Chr4:157436084_157436365_-; circRNA_4917|Chr4:157436084_157436371_-; circRNA_4919|Chr4:157436084_157436610_-; circRNA_6536|Chr8:67801800_67812158_-
GO:0030154	cell differentiation	biological_process	2	46	205	6636	0.168828237	0.199299675	1.407423118	circRNA_4461|Chr3:152966158_152973518_-; circRNA_5590|Chr6:12179226_12194014_+
GO:0043565	sequence-specific DNA binding	molecular_function	2	46	205	6636	0.168828237	0.199299675	1.407423118	circRNA_5590|Chr6:12179226_12194014_+; circRNA_6825|Chr9:2205172_2246426_+
GO:0051015	actin filament binding	molecular_function	1	46	107	6636	0.169329986	0.199405628	1.348232426	circRNA_2246|Chr15:33610716_33637119_-
GO:0030054	cell junction	cellular_component	2	46	207	6636	0.17224499	0.202346056	1.393824827	circRNA_2512|Chr16:50437205_50487053_-; circRNA_2836|Chr17:87758882_87771508_-
GO:0045893	positive regulation of transcription, DNA-templated	biological_process	3	46	317	6636	0.175599009	0.205786732	1.365244822	circRNA_4178|Chr3:44500847_44522988_-; circRNA_5590|Chr6:12179226_12194014_+; circRNA_6536|Chr8:67801800_67812158_-
GO:0016323	basolateral plasma membrane	cellular_component	1	46	110	6636	0.176760435	0.206647465	1.311462451	circRNA_3949|Chr20:20259263_20276110_+
GO:0042383	sarcolemma	cellular_component	1	46	111	6636	0.179249285	0.209052178	1.299647474	circRNA_3949|Chr20:20259263_20276110_+
GO:0035556	intracellular signal transduction	biological_process	3	46	324	6636	0.185320256	0.21561299	1.335748792	circRNA_3342|Chr2:25786589_25787923_-; circRNA_3346|Chr2:25924932_25927179_-; circRNA_4225|Chr3:60610877_60624155_-
GO:0006357	regulation of transcription by RNA polymerase II	biological_process	2	46	217	6636	0.18962627	0.220093801	1.329593268	circRNA_1551|Chr12:25431687_25435591_+; circRNA_6825|Chr9:2205172_2246426_+
GO:0005525	GTP binding	molecular_function	1	46	116	6636	0.191775074	0.222055349	1.243628186	circRNA_6060|Chr7:29284390_29288495_+
GO:0000790	nuclear chromatin	cellular_component	1	46	117	6636	0.194295224	0.223902115	1.232998885	circRNA_3048|Chr18:65825830_65841509_+
GO:0000977	RNA polymerase II regulatory region sequence-specific DNA binding	molecular_function	1	46	117	6636	0.194295224	0.223902115	1.232998885	circRNA_6825|Chr9:2205172_2246426_+
GO:0030335	positive regulation of cell migration	biological_process	1	46	119	6636	0.199349051	0.229180381	1.212276215	circRNA_4178|Chr3:44500847_44522988_-
GO:0007507	heart development	biological_process	2	46	228	6636	0.209259657	0.240003966	1.265446224	circRNA_3048|Chr18:65825830_65841509_+; circRNA_4178|Chr3:44500847_44522988_-
GO:0005737	cytoplasm	cellular_component	18	46	2300	6636	0.211758155	0.24206201	1.12899811	circRNA_1551|Chr12:25431687_25435591_+; circRNA_2246|Chr15:33610716_33637119_-; circRNA_2941|Chr18:29409770_29412096_+; circRNA_3048|Chr18:65825830_65841509_+; circRNA_3154|Chr19:29642344_29645344_-; circRNA_3235|Chr19:43899905_43908769_-; circRNA_3342|Chr2:25786589_25787923_-; circRNA_3346|Chr2:25924932_25927179_-; circRNA_3753|Chr2:218919131_218929338_-; circRNA_4225|Chr3:60610877_60624155_-; c…
GO:0006508	proteolysis	biological_process	1	46	124	6636	0.212054323	0.24206201	1.163394109	circRNA_3235|Chr19:43899905_43908769_-
GO:0016887	ATPase activity	molecular_function	1	46	127	6636	0.219719165	0.250221354	1.135912359	circRNA_2246|Chr15:33610716_33637119_-
GO:0005615	extracellular space	cellular_component	2	46	236	6636	0.22382877	0.254262494	1.222549742	circRNA_3235|Chr19:43899905_43908769_-; circRNA_6087|Chr7:42328501_42339634_+
GO:0017137	Rab GTPase binding	molecular_function	1	46	129	6636	0.224843693	0.254262494	1.118301314	circRNA_4126|Chr3:21721366_21736929_+
GO:0007155	cell adhesion	biological_process	1	46	129	6636	0.224843693	0.254262494	1.118301314	circRNA_6087|Chr7:42328501_42339634_+
GO:0006886	intracellular protein transport	biological_process	1	46	130	6636	0.227409872	0.256075138	1.109698997	circRNA_4126|Chr3:21721366_21736929_+
GO:0004842	ubiquitin-protein transferase activity	molecular_function	2	46	238	6636	0.227504772	0.256075138	1.212276215	circRNA_2171|Chr14:110683107_110709166_+; circRNA_4758|Chr4:88610656_88627387_-
GO:0055114	oxidation-reduction process	biological_process	1	46	132	6636	0.232549288	0.261145836	1.092885375	circRNA_5485|Chr5:167014847_167016955_-
GO:0008022	protein C-terminus binding	molecular_function	1	46	133	6636	0.235122221	0.26342397	1.084668192	circRNA_6536|Chr8:67801800_67812158_-
GO:0031965	nuclear membrane	cellular_component	1	46	137	6636	0.245432007	0.273707584	1.052999048	circRNA_2269|Chr15:38651172_38701205_-
GO:0007283	spermatogenesis	biological_process	1	46	137	6636	0.245432007	0.273707584	1.052999048	circRNA_6536|Chr8:67801800_67812158_-
GO:0015629	actin cytoskeleton	cellular_component	1	46	138	6636	0.248013246	0.27595037	1.04536862	circRNA_2836|Chr17:87758882_87771508_-
GO:0042803	protein homodimerization activity	molecular_function	3	46	369	6636	0.251637514	0.279340727	1.172852598	circRNA_2246|Chr15:33610716_33637119_-; circRNA_4178|Chr3:44500847_44522988_-; circRNA_6844|Chr9:11209034_11219449_-
GO:0006974	cellular response to DNA damage stimulus	biological_process	1	46	140	6636	0.253179292	0.280409101	1.030434783	circRNA_2171|Chr14:110683107_110709166_+
GO:0004674	protein serine/threonine kinase activity	molecular_function	2	46	254	6636	0.257321077	0.284345665	1.135912359	circRNA_4178|Chr3:44500847_44522988_-; circRNA_5975|Chr6:136059672_136084622_+
GO:0007010	cytoskeleton organization	biological_process	1	46	144	6636	0.263521859	0.29053435	1.001811594	circRNA_3949|Chr20:20259263_20276110_+
GO:0005856	cytoskeleton	cellular_component	1	46	145	6636	0.266108912	0.292719803	0.994902549	circRNA_6087|Chr7:42328501_42339634_+
GO:0016567	protein ubiquitination	biological_process	2	46	260	6636	0.268657586	0.294853223	1.109698997	circRNA_2171|Chr14:110683107_110709166_+; circRNA_4758|Chr4:88610656_88627387_-
GO:0007275	multicellular organism development	biological_process	1	46	147	6636	0.271283815	0.297061915	0.98136646	circRNA_1551|Chr12:25431687_25435591_+
GO:0005654	nucleoplasm	cellular_component	9	46	1160	6636	0.275502463	0.301000433	1.119265367	circRNA_0212|Chr1:104785950_104795565_+; circRNA_1551|Chr12:25431687_25435591_+; circRNA_1603|Chr12:41157218_41200958_+; circRNA_2269|Chr15:38651172_38701205_-; circRNA_3048|Chr18:65825830_65841509_+; circRNA_4461|Chr3:152966158_152973518_-; circRNA_4710|Chr4:66193731_66214585_+; circRNA_5382|Chr5:144539229_144547479_-; circRNA_6825|Chr9:2205172_2246426_+
GO:0006355	regulation of transcription, DNA-templated	biological_process	3	46	389	6636	0.282725219	0.30819596	1.112551693	circRNA_1551|Chr12:25431687_25435591_+; circRNA_2269|Chr15:38651172_38701205_-; circRNA_6825|Chr9:2205172_2246426_+
GO:0005911	cell-cell junction	cellular_component	1	46	156	6636	0.294559913	0.320375277	0.924749164	circRNA_2512|Chr16:50437205_50487053_-
GO:0008017	microtubule binding	molecular_function	1	46	163	6636	0.312612769	0.339247938	0.88503601	circRNA_2246|Chr15:33610716_33637119_-
GO:0005789	endoplasmic reticulum membrane	cellular_component	1	46	164	6636	0.315185696	0.341274892	0.879639449	circRNA_5784|Chr6:80235400_80248440_+
GO:0045202	synapse	cellular_component	1	46	165	6636	0.317756808	0.343290837	0.8743083	circRNA_3949|Chr20:20259263_20276110_+
GO:0008285	negative regulation of cell proliferation	biological_process	1	46	167	6636	0.322893202	0.34806305	0.863837542	circRNA_4627|Chr4:38263240_38271681_+
GO:0016324	apical plasma membrane	cellular_component	1	46	170	6636	0.330581804	0.355559096	0.84859335	circRNA_2512|Chr16:50437205_50487053_-
GO:0043065	positive regulation of apoptotic process	biological_process	1	46	171	6636	0.33314004	0.35751614	0.843630816	circRNA_3235|Chr19:43899905_43908769_-
GO:0030424	axon	cellular_component	1	46	172	6636	0.335695811	0.359461886	0.838725986	circRNA_3949|Chr20:20259263_20276110_+
GO:0016477	cell migration	biological_process	1	46	188	6636	0.376185183	0.40192854	0.767345051	circRNA_4461|Chr3:152966158_152973518_-
GO:0003677	DNA binding	molecular_function	3	46	449	6636	0.37878002	0.403809537	0.963881088	circRNA_1551|Chr12:25431687_25435591_+; circRNA_3048|Chr18:65825830_65841509_+; circRNA_6825|Chr9:2205172_2246426_+
GO:0001701	in utero embryonic development	biological_process	1	46	193	6636	0.388653248	0.413424554	0.747465645	circRNA_4178|Chr3:44500847_44522988_-
GO:0000139	Golgi membrane	cellular_component	1	46	197	6636	0.398554	0.423026614	0.732288678	circRNA_6060|Chr7:29284390_29288495_+
GO:0009986	cell surface	cellular_component	1	46	198	6636	0.401018437	0.424710992	0.72859025	circRNA_3949|Chr20:20259263_20276110_+
GO:0010628	positive regulation of gene expression	biological_process	1	46	200	6636	0.405933997	0.428978285	0.721304348	circRNA_3949|Chr20:20259263_20276110_+
GO:0008134	transcription factor binding	molecular_function	1	46	202	6636	0.410831429	0.433207868	0.714162721	circRNA_6536|Chr8:67801800_67812158_-
GO:0003682	chromatin binding	molecular_function	2	46	345	6636	0.431101962	0.453594239	0.836294896	circRNA_3048|Chr18:65825830_65841509_+; circRNA_6825|Chr9:2205172_2246426_+
GO:0045296	cadherin binding	molecular_function	1	46	211	6636	0.432634094	0.454218875	0.683700804	circRNA_3949|Chr20:20259263_20276110_+
GO:0005509	calcium ion binding	molecular_function	2	46	347	6636	0.43484528	0.455552198	0.831474753	circRNA_2512|Chr16:50437205_50487053_-; circRNA_4612|Chr4:31220330_31320090_+
GO:0004672	protein kinase activity	molecular_function	1	46	214	6636	0.439811738	0.458769141	0.674116213	circRNA_4178|Chr3:44500847_44522988_-
GO:0008284	positive regulation of cell proliferation	biological_process	1	46	214	6636	0.439811738	0.458769141	0.674116213	circRNA_6087|Chr7:42328501_42339634_+
GO:0005887	integral component of plasma membrane	cellular_component	1	46	215	6636	0.442193894	0.460262032	0.670980789	circRNA_4178|Chr3:44500847_44522988_-
GO:0030425	dendrite	cellular_component	1	46	218	6636	0.449308584	0.466663851	0.661747108	circRNA_3949|Chr20:20259263_20276110_+
GO:0043005	neuron projection	cellular_component	1	46	221	6636	0.456374743	0.472987957	0.652764116	circRNA_3949|Chr20:20259263_20276110_+
GO:0019899	enzyme binding	molecular_function	1	46	223	6636	0.461058033	0.476820701	0.646909729	circRNA_6536|Chr8:67801800_67812158_-
GO:0043025	neuronal cell body	cellular_component	1	46	225	6636	0.465718987	0.480614051	0.64115942	circRNA_1551|Chr12:25431687_25435591_+
GO:0006366	transcription by RNA polymerase II	biological_process	1	46	233	6636	0.484133929	0.49855494	0.619145363	circRNA_1551|Chr12:25431687_25435591_+
GO:0006468	protein phosphorylation	biological_process	2	46	384	6636	0.50239917	0.516265814	0.751358696	circRNA_4178|Chr3:44500847_44522988_-; circRNA_5975|Chr6:136059672_136084622_+
GO:0046982	protein heterodimerization activity	molecular_function	1	46	264	6636	0.551807112	0.565836106	0.546442688	circRNA_2246|Chr15:33610716_33637119_-
GO:0048471	perinuclear region of cytoplasm	cellular_component	2	46	415	6636	0.555925119	0.56885361	0.695233106	circRNA_2512|Chr16:50437205_50487053_-; circRNA_3753|Chr2:218919131_218929338_-
GO:0005739	mitochondrion	cellular_component	2	46	418	6636	0.560932752	0.572766776	0.690243395	circRNA_4612|Chr4:31220330_31320090_+; circRNA_5485|Chr5:167014847_167016955_-
GO:0005829	cytosol	cellular_component	11	46	1759	6636	0.581988142	0.593015285	0.902143016	circRNA_1603|Chr12:41157218_41200958_+; circRNA_2161|Chr14:106916021_106930939_-; circRNA_3048|Chr18:65825830_65841509_+; circRNA_4126|Chr3:21721366_21736929_+; circRNA_4758|Chr4:88610656_88627387_-; circRNA_4916|Chr4:157436084_157436365_-; circRNA_4917|Chr4:157436084_157436371_-; circRNA_4919|Chr4:157436084_157436610_-; circRNA_5382|Chr5:144539229_144547479_-; circRNA_6060|Chr7:29284390_29288495…
GO:0016020	membrane	cellular_component	3	46	623	6636	0.638632706	0.649366029	0.694675134	circRNA_1603|Chr12:41157218_41200958_+; circRNA_3753|Chr2:218919131_218929338_-; circRNA_3949|Chr20:20259263_20276110_+
GO:0005524	ATP binding	molecular_function	4	46	822	6636	0.689934817	0.700059647	0.701999365	circRNA_1603|Chr12:41157218_41200958_+; circRNA_2246|Chr15:33610716_33637119_-; circRNA_4178|Chr3:44500847_44522988_-; circRNA_5975|Chr6:136059672_136084622_+
GO:0005515	protein binding	molecular_function	4	46	866	6636	0.734972825	0.744198425	0.666331961	circRNA_2941|Chr18:29409770_29412096_+; circRNA_3235|Chr19:43899905_43908769_-; circRNA_3949|Chr20:20259263_20276110_+; circRNA_6536|Chr8:67801800_67812158_-
GO:0005730	nucleolus	cellular_component	1	46	378	6636	0.746568494	0.754361484	0.381642512	circRNA_3048|Chr18:65825830_65841509_+
GO:0005575	cellular_component	cellular_component	5	46	1043	6636	0.751318157	0.757579142	0.691566968	circRNA_1551|Chr12:25431687_25435591_+; circRNA_3154|Chr19:29642344_29645344_-; circRNA_4612|Chr4:31220330_31320090_+; circRNA_5382|Chr5:144539229_144547479_-; circRNA_6735|Chr8:112777013_112778440_-
GO:0008150	biological_process	biological_process	4	46	937	6636	0.797780475	0.802756236	0.615841492	circRNA_3154|Chr19:29642344_29645344_-; circRNA_4612|Chr4:31220330_31320090_+; circRNA_5382|Chr5:144539229_144547479_-; circRNA_6735|Chr8:112777013_112778440_-
GO:0005634	nucleus	cellular_component	12	46	2335	6636	0.874465614	0.878094102	0.741383484	circRNA_1551|Chr12:25431687_25435591_+; circRNA_1603|Chr12:41157218_41200958_+; circRNA_2171|Chr14:110683107_110709166_+; circRNA_2269|Chr15:38651172_38701205_-; circRNA_2512|Chr16:50437205_50487053_-; circRNA_3048|Chr18:65825830_65841509_+; circRNA_4627|Chr4:38263240_38271681_+; circRNA_4758|Chr4:88610656_88627387_-; circRNA_5382|Chr5:144539229_144547479_-; circRNA_5590|Chr6:12179226_12194014_+;…
GO:0003674	molecular_function	molecular_function	4	46	1140	6636	0.91621858	0.918115513	0.50617849	circRNA_1551|Chr12:25431687_25435591_+; circRNA_4612|Chr4:31220330_31320090_+; circRNA_5382|Chr5:144539229_144547479_-; circRNA_6735|Chr8:112777013_112778440_-
GO:0045944	positive regulation of transcription by RNA polymerase II	biological_process	1	46	588	6636	0.924029019	0.924029019	0.245341615	circRNA_4178|Chr3:44500847_44522988_-
