# Supplementary material for: Comprehensive Analysis of the Profiles of Differentially Expressed mRNAs, lncRNAs, and circRNAs in Phosgene-Induced Acute Lung Injury
Source: Biomed Res Int. 2021 Jan 9;2021:6278526. doi: 10.1155/2021/6278526 (PMC7811572; doi:10.1155/2021/6278526)
Supplement: Supplementary 13 — Table S13: GO with differentially expressed mRNAs between the B and C group. [file 6278526.f13.txt]

Table S13 GO with differentially expressed mRNAs between B and C group
id	Term	Category	ListHits	ListTotal	PopHits	PopTotal	pValue	qValue	Enrichment_score	Gene
GO:0032973	amino acid export across plasma membrane	biological_process	1	20	1	19037	0	0	951.85	Slc36a2
GO:0070881	regulation of proline transport	biological_process	1	20	1	19037	0	0	951.85	Slc36a2
GO:1900925	positive regulation of glycine import across plasma membrane	biological_process	1	20	1	19037	0	0	951.85	Slc36a2
GO:0010714	positive regulation of collagen metabolic process	biological_process	1	20	1	19037	0	0	951.85	Retn
GO:0070994	detection of oxidative stress	biological_process	1	20	1	19037	0	0	951.85	Adipoq
GO:0090317	negative regulation of intracellular protein transport	biological_process	1	20	1	19037	0	0	951.85	Adipoq
GO:2000478	positive regulation of metanephric glomerular visceral epithelial cell development	biological_process	1	20	1	19037	0	0	951.85	Adipoq
GO:2000534	positive regulation of renal albumin absorption	biological_process	1	20	1	19037	0	0	951.85	Adipoq
GO:2000590	negative regulation of metanephric mesenchymal cell migration	biological_process	1	20	1	19037	0	0	951.85	Adipoq
GO:0019391	glucuronoside catabolic process	biological_process	1	20	1	19037	0	0	951.85	Abhd10
GO:0031703	type 2 angiotensin receptor binding	molecular_function	1	20	1	19037	0	0	951.85	Agt
GO:0034104	negative regulation of tissue remodeling	biological_process	1	20	1	19037	0	0	951.85	Agt
GO:0070471	uterine smooth muscle contraction	biological_process	1	20	1	19037	0	0	951.85	Agt
GO:1905010	positive regulation of L-lysine import across plasma membrane	biological_process	1	20	1	19037	0	0	951.85	Agt
GO:1905589	positive regulation of L-arginine import across plasma membrane	biological_process	1	20	1	19037	0	0	951.85	Agt
GO:0043265	ectoplasm	cellular_component	1	20	1	19037	0	0	951.85	Gys2
GO:0002149	hypochlorous acid biosynthetic process	biological_process	1	20	1	19037	0	0	951.85	Mpo
GO:0036153	triglyceride acyl-chain remodeling	biological_process	1	20	1	19037	0	0	951.85	Pnpla3
GO:0051264	mono-olein transacylation activity	molecular_function	1	20	1	19037	0	0	951.85	Pnpla3
GO:0051265	diolein transacylation activity	molecular_function	1	20	1	19037	0	0	951.85	Pnpla3
GO:0002414	immunoglobulin transcytosis in epithelial cells	biological_process	1	20	1	19037	0	0	951.85	Cd300lg
GO:0005811	lipid droplet	cellular_component	4	20	77	19037	1.40E-08	2.30E-07	49.44675325	Fabp4; Plin1; Cidec; Pnpla3
GO:0034389	lipid particle organization	biological_process	2	20	15	19037	4.48E-07	7.01E-06	126.9133333	Cidec; Pnpla3
GO:0032270	positive regulation of cellular protein metabolic process	biological_process	2	20	17	19037	6.68E-07	1.00E-05	111.9823529	Adipoq; Agt
GO:0005302	L-tyrosine transmembrane transporter activity	molecular_function	1	20	2	19037	1.05E-06	1.14E-05	475.925	Slc36a2
GO:0033034	positive regulation of myeloid cell apoptotic process	biological_process	1	20	2	19037	1.05E-06	1.14E-05	475.925	Adipoq
GO:2000584	negative regulation of platelet-derived growth factor receptor-alpha signaling pathway	biological_process	1	20	2	19037	1.05E-06	1.14E-05	475.925	Adipoq
GO:0102390	mycophenolic acid acyl-glucuronide esterase activity	molecular_function	1	20	2	19037	1.05E-06	1.14E-05	475.925	Abhd10
GO:0001999	renal response to blood flow involved in circulatory renin-angiotensin regulation of systemic arterial blood pressure	biological_process	1	20	2	19037	1.05E-06	1.14E-05	475.925	Agt
GO:0004373	glycogen (starch) synthase activity	molecular_function	1	20	2	19037	1.05E-06	1.14E-05	475.925	Gys2
GO:0002679	respiratory burst involved in defense response	biological_process	1	20	2	19037	1.05E-06	1.14E-05	475.925	Mpo
GO:0098871	postsynaptic actin cytoskeleton	cellular_component	1	20	2	19037	1.05E-06	1.14E-05	475.925	Cttn
GO:0001791	IgM binding	molecular_function	1	20	2	19037	1.05E-06	1.14E-05	475.925	Cd300lg
GO:0005280	amino acid:proton symporter activity	molecular_function	1	20	3	19037	3.14E-06	2.22E-05	317.2833333	Slc36a2
GO:2000872	positive regulation of progesterone secretion	biological_process	1	20	3	19037	3.14E-06	2.22E-05	317.2833333	Retn
GO:0045715	negative regulation of low-density lipoprotein particle receptor biosynthetic process	biological_process	1	20	3	19037	3.14E-06	2.22E-05	317.2833333	Adipoq
GO:0045923	positive regulation of fatty acid metabolic process	biological_process	1	20	3	19037	3.14E-06	2.22E-05	317.2833333	Adipoq
GO:0010866	regulation of triglyceride biosynthetic process	biological_process	1	20	3	19037	3.14E-06	2.22E-05	317.2833333	Thrsp
GO:0046890	regulation of lipid biosynthetic process	biological_process	1	20	3	19037	3.14E-06	2.22E-05	317.2833333	Thrsp
GO:0001543	ovarian follicle rupture	biological_process	1	20	3	19037	3.14E-06	2.22E-05	317.2833333	Agt
GO:0001998	angiotensin-mediated vasoconstriction involved in regulation of systemic arterial blood pressure	biological_process	1	20	3	19037	3.14E-06	2.22E-05	317.2833333	Agt
GO:0002019	regulation of renal output by angiotensin	biological_process	1	20	3	19037	3.14E-06	2.22E-05	317.2833333	Agt
GO:0003051	angiotensin-mediated drinking behavior	biological_process	1	20	3	19037	3.14E-06	2.22E-05	317.2833333	Agt
GO:0003331	positive regulation of extracellular matrix constituent secretion	biological_process	1	20	3	19037	3.14E-06	2.22E-05	317.2833333	Agt
GO:0035813	regulation of renal sodium excretion	biological_process	1	20	3	19037	3.14E-06	2.22E-05	317.2833333	Agt
GO:1901201	regulation of extracellular matrix assembly	biological_process	1	20	3	19037	3.14E-06	2.22E-05	317.2833333	Agt
GO:1903598	positive regulation of gap junction assembly	biological_process	1	20	3	19037	3.14E-06	2.22E-05	317.2833333	Agt
GO:0017042	glycosylceramidase activity	molecular_function	1	20	3	19037	3.14E-06	2.22E-05	317.2833333	Klb
GO:1990268	response to gold nanoparticle	biological_process	1	20	3	19037	3.14E-06	2.22E-05	317.2833333	Mpo
GO:0097581	lamellipodium organization	biological_process	1	20	3	19037	3.14E-06	2.22E-05	317.2833333	Cttn
GO:0098885	modification of postsynaptic actin cytoskeleton	biological_process	1	20	3	19037	3.14E-06	2.22E-05	317.2833333	Cttn
GO:0045777	positive regulation of blood pressure	biological_process	2	20	32	19037	4.82E-06	3.34E-05	59.490625	Adipoq; Agt
GO:0005179	hormone activity	molecular_function	3	20	111	19037	4.94E-06	3.35E-05	25.72567568	Retn; Adipoq; Agt
GO:0010155	regulation of proton transport	biological_process	1	20	4	19037	6.28E-06	3.69E-05	237.9625	Slc36a2
GO:0070543	response to linoleic acid	biological_process	1	20	4	19037	6.28E-06	3.69E-05	237.9625	Adipoq
GO:0001991	regulation of systemic arterial blood pressure by circulatory renin-angiotensin	biological_process	1	20	4	19037	6.28E-06	3.69E-05	237.9625	Agt
GO:0002018	renin-angiotensin regulation of aldosterone production	biological_process	1	20	4	19037	6.28E-06	3.69E-05	237.9625	Agt
GO:0031701	angiotensin receptor binding	molecular_function	1	20	4	19037	6.28E-06	3.69E-05	237.9625	Agt
GO:0048144	fibroblast proliferation	biological_process	1	20	4	19037	6.28E-06	3.69E-05	237.9625	Agt
GO:0051969	regulation of transmission of nerve impulse	biological_process	1	20	4	19037	6.28E-06	3.69E-05	237.9625	Agt
GO:0046477	glycosylceramide catabolic process	biological_process	1	20	4	19037	6.28E-06	3.69E-05	237.9625	Klb
GO:0050873	brown fat cell differentiation	biological_process	2	20	35	19037	6.35E-06	3.69E-05	54.39142857	Fabp4; Adipoq
GO:2000467	positive regulation of glycogen (starch) synthase activity	biological_process	1	20	5	19037	1.05E-05	5.31E-05	190.37	Adipoq
GO:2000481	positive regulation of cAMP-dependent protein kinase activity	biological_process	1	20	5	19037	1.05E-05	5.31E-05	190.37	Adipoq
GO:0008065	establishment of blood-nerve barrier	biological_process	1	20	5	19037	1.05E-05	5.31E-05	190.37	Agt
GO:0010536	positive regulation of activation of Janus kinase activity	biological_process	1	20	5	19037	1.05E-05	5.31E-05	190.37	Agt
GO:0014873	response to muscle activity involved in regulation of muscle adaptation	biological_process	1	20	5	19037	1.05E-05	5.31E-05	190.37	Agt
GO:0051387	negative regulation of neurotrophin TRK receptor signaling pathway	biological_process	1	20	5	19037	1.05E-05	5.31E-05	190.37	Agt
GO:0035727	lysophosphatidic acid binding	molecular_function	1	20	5	19037	1.05E-05	5.31E-05	190.37	Pnpla3
GO:0036042	long-chain fatty acyl-CoA binding	molecular_function	1	20	5	19037	1.05E-05	5.31E-05	190.37	Pnpla3
GO:0042171	lysophosphatidic acid acyltransferase activity	molecular_function	1	20	5	19037	1.05E-05	5.31E-05	190.37	Pnpla3
GO:0033211	adiponectin-activated signaling pathway	biological_process	1	20	6	19037	1.57E-05	7.24E-05	158.6416667	Adipoq
GO:0045650	negative regulation of macrophage differentiation	biological_process	1	20	6	19037	1.57E-05	7.24E-05	158.6416667	Adipoq
GO:0016151	nickel cation binding	molecular_function	1	20	6	19037	1.57E-05	7.24E-05	158.6416667	Car3
GO:0002035	brain renin-angiotensin system	biological_process	1	20	6	19037	1.57E-05	7.24E-05	158.6416667	Agt
GO:0048659	smooth muscle cell proliferation	biological_process	1	20	6	19037	1.57E-05	7.24E-05	158.6416667	Agt
GO:1903779	regulation of cardiac conduction	biological_process	1	20	6	19037	1.57E-05	7.24E-05	158.6416667	Agt
GO:0090080	positive regulation of MAPKKK cascade by fibroblast growth factor receptor signaling pathway	biological_process	1	20	6	19037	1.57E-05	7.24E-05	158.6416667	Klb
GO:0015180	L-alanine transmembrane transporter activity	molecular_function	1	20	7	19037	2.20E-05	9.08E-05	135.9785714	Slc36a2
GO:0015193	L-proline transmembrane transporter activity	molecular_function	1	20	7	19037	2.20E-05	9.08E-05	135.9785714	Slc36a2
GO:0015808	L-alanine transport	biological_process	1	20	7	19037	2.20E-05	9.08E-05	135.9785714	Slc36a2
GO:0035524	proline transmembrane transport	biological_process	1	20	7	19037	2.20E-05	9.08E-05	135.9785714	Slc36a2
GO:0033691	sialic acid binding	molecular_function	1	20	7	19037	2.20E-05	9.08E-05	135.9785714	Adipoq
GO:1900121	negative regulation of receptor binding	biological_process	1	20	7	19037	2.20E-05	9.08E-05	135.9785714	Adipoq
GO:0014061	regulation of norepinephrine secretion	biological_process	1	20	7	19037	2.20E-05	9.08E-05	135.9785714	Agt
GO:0050663	cytokine secretion	biological_process	1	20	7	19037	2.20E-05	9.08E-05	135.9785714	Agt
GO:0006650	glycerophospholipid metabolic process	biological_process	1	20	7	19037	2.20E-05	9.08E-05	135.9785714	Pnpla3
GO:0015187	glycine transmembrane transporter activity	molecular_function	1	20	8	19037	2.92E-05	0.000109687	118.98125	Slc36a2
GO:0015824	proline transport	biological_process	1	20	8	19037	2.92E-05	0.000109687	118.98125	Slc36a2
GO:0010745	negative regulation of macrophage derived foam cell differentiation	biological_process	1	20	8	19037	2.92E-05	0.000109687	118.98125	Adipoq
GO:1904753	negative regulation of vascular associated smooth muscle cell migration	biological_process	1	20	8	19037	2.92E-05	0.000109687	118.98125	Adipoq
GO:0010873	positive regulation of cholesterol esterification	biological_process	1	20	8	19037	2.92E-05	0.000109687	118.98125	Agt
GO:1900020	positive regulation of protein kinase C activity	biological_process	1	20	8	19037	2.92E-05	0.000109687	118.98125	Agt
GO:0004565	beta-galactosidase activity	molecular_function	1	20	8	19037	2.92E-05	0.000109687	118.98125	Klb
GO:0001878	response to yeast	biological_process	1	20	8	19037	2.92E-05	0.000109687	118.98125	Mpo
GO:0006930	substrate-dependent cell migration, cell extension	biological_process	1	20	8	19037	2.92E-05	0.000109687	118.98125	Cttn
GO:0015816	glycine transport	biological_process	1	20	9	19037	3.76E-05	0.000128857	105.7611111	Slc36a2
GO:0010642	negative regulation of platelet-derived growth factor receptor signaling pathway	biological_process	1	20	9	19037	3.76E-05	0.000128857	105.7611111	Adipoq
GO:0010739	positive regulation of protein kinase A signaling	biological_process	1	20	9	19037	3.76E-05	0.000128857	105.7611111	Adipoq
GO:0030853	negative regulation of granulocyte differentiation	biological_process	1	20	9	19037	3.76E-05	0.000128857	105.7611111	Adipoq
GO:0034115	negative regulation of heterotypic cell-cell adhesion	biological_process	1	20	9	19037	3.76E-05	0.000128857	105.7611111	Adipoq
GO:0048143	astrocyte activation	biological_process	1	20	9	19037	3.76E-05	0.000128857	105.7611111	Agt
GO:0034374	low-density lipoprotein particle remodeling	biological_process	1	20	9	19037	3.76E-05	0.000128857	105.7611111	Mpo
GO:0071933	Arp2/3 complex binding	molecular_function	1	20	9	19037	3.76E-05	0.000128857	105.7611111	Cttn
GO:0097062	dendritic spine maintenance	biological_process	1	20	9	19037	3.76E-05	0.000128857	105.7611111	Cttn
GO:2000252	negative regulation of feeding behavior	biological_process	1	20	10	19037	4.69E-05	0.000155063	95.185	Retn
GO:0009744	response to sucrose	biological_process	1	20	10	19037	4.69E-05	0.000155063	95.185	Adipoq
GO:0031702	type 1 angiotensin receptor binding	molecular_function	1	20	10	19037	4.69E-05	0.000155063	95.185	Agt
GO:0006654	phosphatidic acid biosynthetic process	biological_process	1	20	10	19037	4.69E-05	0.000155063	95.185	Pnpla3
GO:0034383	low-density lipoprotein particle clearance	biological_process	1	20	11	19037	5.73E-05	0.000174956	86.53181818	Adipoq
GO:0004553	hydrolase activity, hydrolyzing O-glycosyl compounds	molecular_function	1	20	11	19037	5.73E-05	0.000174956	86.53181818	Abhd10
GO:0003014	renal system process	biological_process	1	20	11	19037	5.73E-05	0.000174956	86.53181818	Agt
GO:0030432	peristalsis	biological_process	1	20	11	19037	5.73E-05	0.000174956	86.53181818	Agt
GO:0042582	azurophil granule	cellular_component	1	20	11	19037	5.73E-05	0.000174956	86.53181818	Mpo
GO:0005522	profilin binding	molecular_function	1	20	11	19037	5.73E-05	0.000174956	86.53181818	Cttn
GO:0043995	histone acetyltransferase activity (H4-K5 specific)	molecular_function	1	20	11	19037	5.73E-05	0.000174956	86.53181818	LOC103690317
GO:0043996	histone acetyltransferase activity (H4-K8 specific)	molecular_function	1	20	11	19037	5.73E-05	0.000174956	86.53181818	LOC103690317
GO:0046972	histone acetyltransferase activity (H4-K16 specific)	molecular_function	1	20	11	19037	5.73E-05	0.000174956	86.53181818	LOC103690317
GO:0050727	regulation of inflammatory response	biological_process	2	20	75	19037	6.38E-05	0.000193018	25.38266667	Fabp4; Agt
GO:0031953	negative regulation of protein autophosphorylation	biological_process	1	20	12	19037	6.88E-05	0.000198065	79.32083333	Adipoq
GO:0050805	negative regulation of synaptic transmission	biological_process	1	20	12	19037	6.88E-05	0.000198065	79.32083333	Adipoq
GO:0071639	positive regulation of monocyte chemotactic protein-1 production	biological_process	1	20	12	19037	6.88E-05	0.000198065	79.32083333	Adipoq
GO:0014824	artery smooth muscle contraction	biological_process	1	20	12	19037	6.88E-05	0.000198065	79.32083333	Agt
GO:0005536	glucose binding	molecular_function	1	20	12	19037	6.88E-05	0.000198065	79.32083333	Gys2
GO:1990023	mitotic spindle midzone	cellular_component	1	20	12	19037	6.88E-05	0.000198065	79.32083333	Cttn
GO:0045721	negative regulation of gluconeogenesis	biological_process	1	20	13	19037	8.12E-05	0.000219858	73.21923077	Adipoq
GO:0071872	cellular response to epinephrine stimulus	biological_process	1	20	13	19037	8.12E-05	0.000219858	73.21923077	Adipoq
GO:0004089	carbonate dehydratase activity	molecular_function	1	20	13	19037	8.12E-05	0.000219858	73.21923077	Car3
GO:0042756	drinking behavior	biological_process	1	20	13	19037	8.12E-05	0.000219858	73.21923077	Agt
GO:0046622	positive regulation of organ growth	biological_process	1	20	13	19037	8.12E-05	0.000219858	73.21923077	Agt
GO:0051403	stress-activated MAPK cascade	biological_process	1	20	13	19037	8.12E-05	0.000219858	73.21923077	Agt
GO:0019430	removal of superoxide radicals	biological_process	1	20	13	19037	8.12E-05	0.000219858	73.21923077	Mpo
GO:0019432	triglyceride biosynthetic process	biological_process	1	20	13	19037	8.12E-05	0.000219858	73.21923077	Pnpla3
GO:0010804	negative regulation of tumor necrosis factor-mediated signaling pathway	biological_process	1	20	14	19037	9.47E-05	0.000241796	67.98928571	Adipoq
GO:0010875	positive regulation of cholesterol efflux	biological_process	1	20	14	19037	9.47E-05	0.000241796	67.98928571	Adipoq
GO:0046888	negative regulation of hormone secretion	biological_process	1	20	14	19037	9.47E-05	0.000241796	67.98928571	Adipoq
GO:0060081	membrane hyperpolarization	biological_process	1	20	14	19037	9.47E-05	0.000241796	67.98928571	Adipoq
GO:2000279	negative regulation of DNA biosynthetic process	biological_process	1	20	14	19037	9.47E-05	0.000241796	67.98928571	Adipoq
GO:0045723	positive regulation of fatty acid biosynthetic process	biological_process	1	20	14	19037	9.47E-05	0.000241796	67.98928571	Agt
GO:0061049	cell growth involved in cardiac muscle cell development	biological_process	1	20	14	19037	9.47E-05	0.000241796	67.98928571	Agt
GO:0002021	response to dietary excess	biological_process	1	20	14	19037	9.47E-05	0.000241796	67.98928571	Pnpla3
GO:0050765	negative regulation of phagocytosis	biological_process	1	20	15	19037	0.000109204	0.000271128	63.45666667	Adipoq
GO:0035815	positive regulation of renal sodium excretion	biological_process	1	20	15	19037	0.000109204	0.000271128	63.45666667	Agt
GO:1904754	positive regulation of vascular associated smooth muscle cell migration	biological_process	1	20	15	19037	0.000109204	0.000271128	63.45666667	Agt
GO:0030516	regulation of axon extension	biological_process	1	20	15	19037	0.000109204	0.000271128	63.45666667	Cttn
GO:0050872	white fat cell differentiation	biological_process	1	20	16	19037	0.000124726	0.000299343	59.490625	Fabp4
GO:0007250	activation of NF-kappaB-inducing kinase activity	biological_process	1	20	16	19037	0.000124726	0.000299343	59.490625	Agt
GO:0007588	excretion	biological_process	1	20	16	19037	0.000124726	0.000299343	59.490625	Agt
GO:0043981	histone H4-K5 acetylation	biological_process	1	20	16	19037	0.000124726	0.000299343	59.490625	LOC103690317
GO:0043982	histone H4-K8 acetylation	biological_process	1	20	16	19037	0.000124726	0.000299343	59.490625	LOC103690317
GO:0030247	polysaccharide binding	molecular_function	1	20	17	19037	0.000141267	0.000328104	55.99117647	Clec18a
GO:0019395	fatty acid oxidation	biological_process	1	20	17	19037	0.000141267	0.000328104	55.99117647	Adipoq
GO:1904706	negative regulation of vascular smooth muscle cell proliferation	biological_process	1	20	17	19037	0.000141267	0.000328104	55.99117647	Adipoq
GO:0045742	positive regulation of epidermal growth factor receptor signaling pathway	biological_process	1	20	17	19037	0.000141267	0.000328104	55.99117647	Agt
GO:0042744	hydrogen peroxide catabolic process	biological_process	1	20	17	19037	0.000141267	0.000328104	55.99117647	Mpo
GO:0070208	protein heterotrimerization	biological_process	1	20	18	19037	0.000158825	0.00035078	52.88055556	Adipoq
GO:0007202	activation of phospholipase C activity	biological_process	1	20	18	19037	0.000158825	0.00035078	52.88055556	Agt
GO:0042445	hormone metabolic process	biological_process	1	20	18	19037	0.000158825	0.00035078	52.88055556	Agt
GO:0051145	smooth muscle cell differentiation	biological_process	1	20	18	19037	0.000158825	0.00035078	52.88055556	Agt
GO:1904385	cellular response to angiotensin	biological_process	1	20	18	19037	0.000158825	0.00035078	52.88055556	Agt
GO:2001275	positive regulation of glucose import in response to insulin stimulus	biological_process	1	20	18	19037	0.000158825	0.00035078	52.88055556	Agt
GO:0005978	glycogen biosynthetic process	biological_process	1	20	18	19037	0.000158825	0.00035078	52.88055556	Gys2
GO:0019433	triglyceride catabolic process	biological_process	1	20	18	19037	0.000158825	0.00035078	52.88055556	Pnpla3
GO:0015078	proton transmembrane transporter activity	molecular_function	1	20	19	19037	0.000177399	0.000380141	50.09736842	Slc36a2
GO:0010666	positive regulation of cardiac muscle cell apoptotic process	biological_process	1	20	19	19037	0.000177399	0.000380141	50.09736842	Agt
GO:0032930	positive regulation of superoxide anion generation	biological_process	1	20	19	19037	0.000177399	0.000380141	50.09736842	Agt
GO:0042310	vasoconstriction	biological_process	1	20	19	19037	0.000177399	0.000380141	50.09736842	Agt
GO:0004601	peroxidase activity	molecular_function	1	20	19	19037	0.000177399	0.000380141	50.09736842	Mpo
GO:0009612	response to mechanical stimulus	biological_process	2	20	106	19037	0.000178541	0.000380323	17.95943396	Retn; Mpo
GO:0050731	positive regulation of peptidyl-tyrosine phosphorylation	biological_process	2	20	107	19037	0.000183568	0.000388732	17.79158879	Adipoq; Agt
GO:0009749	response to glucose	biological_process	2	20	109	19037	0.000193896	0.000402926	17.46513761	Adipoq; Gys2
GO:0006883	cellular sodium ion homeostasis	biological_process	1	20	20	19037	0.000196986	0.000402926	47.5925	Agt
GO:0044130	negative regulation of growth of symbiont in host	biological_process	1	20	20	19037	0.000196986	0.000402926	47.5925	Mpo
GO:0050832	defense response to fungus	biological_process	1	20	20	19037	0.000196986	0.000402926	47.5925	Mpo
GO:0070064	proline-rich region binding	molecular_function	1	20	20	19037	0.000196986	0.000402926	47.5925	Cttn
GO:1903146	regulation of autophagy of mitochondrion	biological_process	1	20	20	19037	0.000196986	0.000402926	47.5925	Cttn
GO:0009651	response to salt stress	biological_process	1	20	21	19037	0.000217584	0.000435168	45.32619048	Agt
GO:0001676	long-chain fatty acid metabolic process	biological_process	1	20	21	19037	0.000217584	0.000435168	45.32619048	Pnpla3
GO:0048870	cell motility	biological_process	1	20	21	19037	0.000217584	0.000435168	45.32619048	Cttn
GO:0043984	histone H4-K16 acetylation	biological_process	1	20	21	19037	0.000217584	0.000435168	45.32619048	LOC103690317
GO:0071285	cellular response to lithium ion	biological_process	1	20	22	19037	0.000239192	0.000470541	43.26590909	Fabp4
GO:0097194	execution phase of apoptosis	biological_process	1	20	22	19037	0.000239192	0.000470541	43.26590909	Cidec
GO:0048041	focal adhesion assembly	biological_process	1	20	22	19037	0.000239192	0.000470541	43.26590909	Cttn
GO:0010613	positive regulation of cardiac muscle hypertrophy	biological_process	1	20	23	19037	0.000261807	0.000509462	41.38478261	Agt
GO:0090190	positive regulation of branching involved in ureteric bud morphogenesis	biological_process	1	20	23	19037	0.000261807	0.000509462	41.38478261	Agt
GO:0010906	regulation of glucose metabolic process	biological_process	1	20	24	19037	0.000285427	0.00054081	39.66041667	Adipoq
GO:0051899	membrane depolarization	biological_process	1	20	24	19037	0.000285427	0.00054081	39.66041667	Adipoq
GO:0004623	phospholipase A2 activity	molecular_function	1	20	24	19037	0.000285427	0.00054081	39.66041667	Pnpla3
GO:0030041	actin filament polymerization	biological_process	1	20	24	19037	0.000285427	0.00054081	39.66041667	Cttn
GO:0045987	positive regulation of smooth muscle contraction	biological_process	1	20	24	19037	0.000285427	0.00054081	39.66041667	Cttn
GO:0017134	fibroblast growth factor binding	molecular_function	1	20	25	19037	0.000310052	0.000584391	38.074	Klb
GO:0007568	aging	biological_process	3	20	323	19037	0.000317926	0.000594109	8.840712074	Retn; Agt; Mpo
GO:0051384	response to glucocorticoid	biological_process	2	20	129	19037	0.000318508	0.000594109	14.75736434	Fabp4; Adipoq
GO:0015171	amino acid transmembrane transporter activity	molecular_function	1	20	26	19037	0.000335678	0.000619713	36.60961538	Slc36a2
GO:1904707	positive regulation of vascular smooth muscle cell proliferation	biological_process	1	20	26	19037	0.000335678	0.000619713	36.60961538	Agt
GO:0005504	fatty acid binding	molecular_function	1	20	27	19037	0.000362304	0.000655424	35.2537037	Fabp4
GO:0006730	one-carbon metabolic process	biological_process	1	20	27	19037	0.000362304	0.000655424	35.2537037	Car3
GO:0042311	vasodilation	biological_process	1	20	27	19037	0.000362304	0.000655424	35.2537037	Agt
GO:0005104	fibroblast growth factor receptor binding	molecular_function	1	20	27	19037	0.000362304	0.000655424	35.2537037	Klb
GO:0000123	histone acetyltransferase complex	cellular_component	1	20	28	19037	0.000389928	0.00070187	33.99464286	LOC103690317
GO:0006979	response to oxidative stress	biological_process	2	20	140	19037	0.000404893	0.000725181	13.59785714	Car3; Mpo
GO:0001816	cytokine production	biological_process	1	20	29	19037	0.000418547	0.000742252	32.82241379	Fabp4
GO:0032757	positive regulation of interleukin-8 production	biological_process	1	20	29	19037	0.000418547	0.000742252	32.82241379	Adipoq
GO:0030863	cortical cytoskeleton	cellular_component	1	20	30	19037	0.000448161	0.000787914	31.72833333	Cttn
GO:0005938	cell cortex	cellular_component	2	20	145	19037	0.000448673	0.000787914	13.12896552	Gys2; Cttn
GO:0005774	vacuolar membrane	cellular_component	1	20	31	19037	0.000478767	0.000824671	30.70483871	Slc36a2
GO:0050806	positive regulation of synaptic transmission	biological_process	1	20	31	19037	0.000478767	0.000824671	30.70483871	Retn
GO:0004806	triglyceride lipase activity	molecular_function	1	20	31	19037	0.000478767	0.000824671	30.70483871	Pnpla3
GO:0002102	podosome	cellular_component	1	20	31	19037	0.000478767	0.000824671	30.70483871	Cttn
GO:0048169	regulation of long-term neuronal synaptic plasticity	biological_process	1	20	32	19037	0.000510363	0.000870762	29.7453125	Agt
GO:2001238	positive regulation of extrinsic apoptotic signaling pathway	biological_process	1	20	32	19037	0.000510363	0.000870762	29.7453125	Agt
GO:0050715	positive regulation of cytokine secretion	biological_process	1	20	33	19037	0.000542948	0.000913371	28.84393939	Agt
GO:0070371	ERK1 and ERK2 cascade	biological_process	1	20	33	19037	0.000542948	0.000913371	28.84393939	Agt
GO:0005977	glycogen metabolic process	biological_process	1	20	33	19037	0.000542948	0.000913371	28.84393939	Gys2
GO:0032094	response to food	biological_process	1	20	34	19037	0.000576519	0.000965334	27.99558824	Mpo
GO:0005829	cytosol	cellular_component	9	20	3175	19037	0.000597336	0.00099556	2.69815748	Fabp4; Thrsp; Abhd10; Car3; Plin1; Klb; Gys2; Cidec; Cttn
GO:0003333	amino acid transmembrane transport	biological_process	1	20	35	19037	0.000611075	0.001013764	27.19571429	Slc36a2
GO:0010469	regulation of signaling receptor activity	biological_process	3	20	389	19037	0.000641667	0.001053306	7.340745501	Retn; Adipoq; Agt
GO:0034612	response to tumor necrosis factor	biological_process	1	20	36	19037	0.000646613	0.001053306	26.44027778	Adipoq
GO:0002027	regulation of heart rate	biological_process	1	20	36	19037	0.000646613	0.001053306	26.44027778	Agt
GO:0061098	positive regulation of protein tyrosine kinase activity	biological_process	1	20	36	19037	0.000646613	0.001053306	26.44027778	Agt
GO:0051924	regulation of calcium ion transport	biological_process	1	20	37	19037	0.000683132	0.001107781	25.72567568	Agt
GO:0045776	negative regulation of blood pressure	biological_process	1	20	38	19037	0.00072063	0.001158155	25.04868421	Adipoq
GO:0055088	lipid homeostasis	biological_process	1	20	38	19037	0.00072063	0.001158155	25.04868421	Pnpla3
GO:0097755	positive regulation of blood vessel diameter	biological_process	1	20	39	19037	0.000759104	0.001214567	24.40641026	Agt
GO:0009967	positive regulation of signal transduction	biological_process	1	20	40	19037	0.000798554	0.001260875	23.79625	Adipoq
GO:0046326	positive regulation of glucose import	biological_process	1	20	40	19037	0.000798554	0.001260875	23.79625	Adipoq
GO:0040018	positive regulation of multicellular organism growth	biological_process	1	20	40	19037	0.000798554	0.001260875	23.79625	Agt
GO:0014911	positive regulation of smooth muscle cell migration	biological_process	1	20	41	19037	0.000838977	0.001318916	23.21585366	Retn
GO:2001237	negative regulation of extrinsic apoptotic signaling pathway	biological_process	1	20	42	19037	0.000880372	0.001377973	22.66309524	Cttn
GO:0008543	fibroblast growth factor receptor signaling pathway	biological_process	1	20	43	19037	0.000922736	0.001438029	22.13604651	Klb
GO:0043124	negative regulation of I-kappaB kinase/NF-kappaB signaling	biological_process	1	20	44	19037	0.000966067	0.001479932	21.63295455	Adipoq
GO:0043407	negative regulation of MAP kinase activity	biological_process	1	20	44	19037	0.000966067	0.001479932	21.63295455	Adipoq
GO:0010595	positive regulation of endothelial cell migration	biological_process	1	20	44	19037	0.000966067	0.001479932	21.63295455	Agt
GO:0050890	cognition	biological_process	1	20	44	19037	0.000966067	0.001479932	21.63295455	Dgcr2
GO:0045429	positive regulation of nitric oxide biosynthetic process	biological_process	1	20	45	19037	0.001010364	0.00153473	21.15222222	Agt
GO:0005905	clathrin-coated pit	cellular_component	1	20	45	19037	0.001010364	0.00153473	21.15222222	Cttn
GO:0045471	response to ethanol	biological_process	2	20	194	19037	0.001045377	0.001581243	9.812886598	Adipoq; Car3
GO:0006635	fatty acid beta-oxidation	biological_process	1	20	47	19037	0.001101848	0.001652772	20.25212766	Adipoq
GO:0032720	negative regulation of tumor necrosis factor production	biological_process	1	20	47	19037	0.001101848	0.001652772	20.25212766	Adipoq
GO:0045599	negative regulation of fat cell differentiation	biological_process	1	20	49	19037	0.001197172	0.001773588	19.4255102	Adipoq
GO:0001658	branching involved in ureteric bud morphogenesis	biological_process	1	20	49	19037	0.001197172	0.001773588	19.4255102	Agt
GO:0030864	cortical actin cytoskeleton	cellular_component	1	20	49	19037	0.001197172	0.001773588	19.4255102	Gys2
GO:0005581	collagen trimer	cellular_component	1	20	53	19037	0.001399281	0.002056087	17.95943396	Adipoq
GO:0030838	positive regulation of actin filament polymerization	biological_process	1	20	53	19037	0.001399281	0.002056087	17.95943396	Cttn
GO:0009409	response to cold	biological_process	1	20	55	19037	0.001506037	0.002203956	17.30636364	Agt
GO:0005615	extracellular space	cellular_component	5	20	1300	19037	0.001689926	0.00246305	3.660961538	Retn; Clec18a; Adipoq; Agt; Mpo
GO:0016791	phosphatase activity	molecular_function	1	20	59	19037	0.001730876	0.002512562	16.13305085	Car3
GO:0042981	regulation of apoptotic process	biological_process	2	20	235	19037	0.001812721	0.002620802	8.100851064	Agt; Cidec
GO:0050729	positive regulation of inflammatory response	biological_process	1	20	61	19037	0.001848931	0.00266246	15.60409836	Fabp4
GO:0042493	response to drug	biological_process	3	20	520	19037	0.00188236	0.0026998	5.491442308	Fabp4; Adipoq; Dgcr2
GO:0008217	regulation of blood pressure	biological_process	1	20	62	19037	0.00190936	0.002727657	15.35241935	Agt
GO:0045860	positive regulation of protein kinase activity	biological_process	1	20	63	19037	0.001970722	0.002793149	15.10873016	Adipoq
GO:0031532	actin cytoskeleton reorganization	biological_process	1	20	63	19037	0.001970722	0.002793149	15.10873016	Cttn
GO:0006006	glucose metabolic process	biological_process	1	20	66	19037	0.002160383	0.003049953	14.4219697	Adipoq
GO:0008284	positive regulation of cell proliferation	biological_process	3	20	544	19037	0.002219441	0.003121088	5.249172794	Fabp4; Agt; Klb
GO:0070373	negative regulation of ERK1 and ERK2 cascade	biological_process	1	20	68	19037	0.002291453	0.003185031	13.99779412	Adipoq
GO:0014068	positive regulation of phosphatidylinositol 3-kinase signaling	biological_process	1	20	68	19037	0.002291453	0.003185031	13.99779412	Agt
GO:0043085	positive regulation of catalytic activity	biological_process	1	20	68	19037	0.002291453	0.003185031	13.99779412	Agt
GO:0006631	fatty acid metabolic process	biological_process	1	20	69	19037	0.002358371	0.003252925	13.79492754	Fabp4
GO:0048146	positive regulation of fibroblast proliferation	biological_process	1	20	69	19037	0.002358371	0.003252925	13.79492754	Agt
GO:0006606	protein import into nucleus	biological_process	1	20	70	19037	0.002426208	0.003333721	13.59785714	Agt
GO:0071944	cell periphery	cellular_component	1	20	71	19037	0.002494964	0.003415159	13.40633803	Adipoq
GO:1902600	proton transmembrane transport	biological_process	1	20	72	19037	0.002564635	0.003470934	13.22013889	Slc36a2
GO:0001568	blood vessel development	biological_process	1	20	72	19037	0.002564635	0.003470934	13.22013889	Agt
GO:0003824	catalytic activity	molecular_function	1	20	72	19037	0.002564635	0.003470934	13.22013889	Pnpla3
GO:0071320	cellular response to cAMP	biological_process	1	20	76	19037	0.002852445	0.003845993	12.52434211	Adipoq
GO:0007160	cell-matrix adhesion	biological_process	1	20	79	19037	0.003077832	0.004134401	12.04873418	Agt
GO:0045444	fat cell differentiation	biological_process	1	20	80	19037	0.003154767	0.004175427	11.898125	Retn
GO:0016525	negative regulation of angiogenesis	biological_process	1	20	80	19037	0.003154767	0.004175427	11.898125	Agt
GO:0005884	actin filament	cellular_component	1	20	80	19037	0.003154767	0.004175427	11.898125	Cttn
GO:0008076	voltage-gated potassium channel complex	cellular_component	1	20	80	19037	0.003154767	0.004175427	11.898125	Cttn
GO:0042632	cholesterol homeostasis	biological_process	1	20	82	19037	0.003311335	0.004350658	11.60792683	Fabp4
GO:0048812	neuron projection morphogenesis	biological_process	1	20	82	19037	0.003311335	0.004350658	11.60792683	Cttn
GO:0048661	positive regulation of smooth muscle cell proliferation	biological_process	1	20	83	19037	0.003390964	0.00443908	11.46807229	Retn
GO:0016042	lipid catabolic process	biological_process	1	20	84	19037	0.003471487	0.004528027	11.33154762	Plin1
GO:0001726	ruffle	cellular_component	1	20	88	19037	0.003802492	0.004941867	10.81647727	Cttn
GO:0016311	dephosphorylation	biological_process	1	20	89	19037	0.003887462	0.00501608	10.69494382	Car3
GO:0033138	positive regulation of peptidyl-serine phosphorylation	biological_process	1	20	89	19037	0.003887462	0.00501608	10.69494382	Agt
GO:0030198	extracellular matrix organization	biological_process	1	20	95	19037	0.004415782	0.005677434	10.01947368	Agt
GO:0035690	cellular response to drug	biological_process	1	20	96	19037	0.004506903	0.005773968	9.915104167	Adipoq
GO:0006629	lipid metabolic process	biological_process	1	20	97	19037	0.004598895	0.00587093	9.812886598	Thrsp
GO:0005576	extracellular region	cellular_component	3	20	669	19037	0.00467337	0.005944923	4.26838565	Retn; Adipoq; Agt
GO:0014823	response to activity	biological_process	1	20	99	19037	0.004785487	0.006066111	9.614646465	Adipoq
GO:0050728	negative regulation of inflammatory response	biological_process	1	20	100	19037	0.004880084	0.006142763	9.5185	Adipoq
GO:0004867	serine-type endopeptidase inhibitor activity	molecular_function	1	20	100	19037	0.004880084	0.006142763	9.5185	Agt
GO:0050830	defense response to Gram-positive bacterium	biological_process	1	20	102	19037	0.00507187	0.006361927	9.331862745	Mpo
GO:0006898	receptor-mediated endocytosis	biological_process	1	20	106	19037	0.005465762	0.006832203	8.979716981	Cttn
GO:0006469	negative regulation of protein kinase activity	biological_process	1	20	110	19037	0.005873324	0.007316251	8.653181818	Fabp4
GO:0071260	cellular response to mechanical stimulus	biological_process	1	20	112	19037	0.006082196	0.007550313	8.498660714	Agt
GO:0032868	response to insulin	biological_process	1	20	113	19037	0.006187899	0.007628917	8.423451327	Retn
GO:0030336	negative regulation of cell migration	biological_process	1	20	113	19037	0.006187899	0.007628917	8.423451327	Adipoq
GO:0043123	positive regulation of I-kappaB kinase/NF-kappaB signaling	biological_process	1	20	118	19037	0.006729016	0.008267733	8.066525424	Adipoq
GO:0007623	circadian rhythm	biological_process	1	20	123	19037	0.007290979	0.008897466	7.738617886	Adipoq
GO:0030308	negative regulation of cell growth	biological_process	1	20	123	19037	0.007290979	0.008897466	7.738617886	Agt
GO:0042742	defense response to bacterium	biological_process	1	20	126	19037	0.007638076	0.009289551	7.554365079	Mpo
GO:0042593	glucose homeostasis	biological_process	1	20	129	19037	0.007992555	0.009687946	7.378682171	Adipoq
GO:0032869	cellular response to insulin stimulus	biological_process	1	20	130	19037	0.008112348	0.009800152	7.321923077	Adipoq
GO:0007584	response to nutrient	biological_process	1	20	132	19037	0.008354373	0.010058777	7.210984848	Adipoq
GO:0072659	protein localization to plasma membrane	biological_process	1	20	136	19037	0.008848134	0.010617761	6.998897059	Adipoq
GO:0007565	female pregnancy	biological_process	1	20	137	19037	0.008973588	0.010732531	6.947810219	Agt
GO:0010951	negative regulation of endopeptidase activity	biological_process	1	20	139	19037	0.009226901	0.010998954	6.847841727	Agt
GO:0030141	secretory granule	cellular_component	1	20	143	19037	0.009743098	0.011575958	6.656293706	Mpo
GO:0031667	response to nutrient levels	biological_process	1	20	146	19037	0.01013857	0.012006201	6.519520548	Adipoq
GO:0008201	heparin binding	molecular_function	1	20	148	19037	0.010406158	0.012282678	6.431418919	Mpo
GO:0001822	kidney development	biological_process	1	20	150	19037	0.010676881	0.012561037	6.345666667	Agt
GO:0071356	cellular response to tumor necrosis factor	biological_process	1	20	151	19037	0.010813415	0.012680227	6.303642384	Fabp4
GO:0005925	focal adhesion	cellular_component	1	20	152	19037	0.010950729	0.012799553	6.262171053	Cttn
GO:0010976	positive regulation of neuron projection development	biological_process	1	20	153	19037	0.01108882	0.012919013	6.22124183	Agt
GO:0020037	heme binding	molecular_function	1	20	155	19037	0.011367328	0.013200768	6.140967742	Mpo
GO:0007204	positive regulation of cytosolic calcium ion concentration	biological_process	1	20	158	19037	0.011790882	0.013648609	6.024367089	Agt
GO:0043410	positive regulation of MAPK cascade	biological_process	1	20	163	19037	0.012512143	0.014437089	5.839570552	Agt
GO:0043524	negative regulation of neuron apoptotic process	biological_process	1	20	166	19037	0.012954033	0.014804609	5.734036145	Agt
GO:0030027	lamellipodium	cellular_component	1	20	166	19037	0.012954033	0.014804609	5.734036145	Cttn
GO:0030426	growth cone	cellular_component	1	20	166	19037	0.012954033	0.014804609	5.734036145	Cttn
GO:0007166	cell surface receptor signaling pathway	biological_process	1	20	173	19037	0.014011467	0.015962431	5.502023121	Agt
GO:0005783	endoplasmic reticulum	cellular_component	3	20	949	19037	0.015685305	0.017812965	3.009009484	Adipoq; Plin1; Cidec
GO:0043197	dendritic spine	cellular_component	1	20	187	19037	0.016235197	0.018379468	5.090106952	Cttn
GO:0045892	negative regulation of transcription, DNA-templated	biological_process	2	20	534	19037	0.017540138	0.019794514	3.564981273	Fabp4; Adipoq
GO:0001934	positive regulation of protein phosphorylation	biological_process	1	20	199	19037	0.018254116	0.02053588	4.783165829	Adipoq
GO:0032355	response to estradiol	biological_process	1	20	204	19037	0.019125408	0.021449056	4.665931373	Agt
GO:0016323	basolateral plasma membrane	cellular_component	1	20	221	19037	0.02221695	0.024838826	4.307013575	Cd300lg
GO:0051260	protein homooligomerization	biological_process	1	20	231	19037	0.024126604	0.026890333	4.120562771	Adipoq
GO:0005856	cytoskeleton	cellular_component	1	20	256	19037	0.029184963	0.032427736	3.718164063	Gys2
GO:0006351	transcription, DNA-templated	biological_process	2	20	654	19037	0.029771807	0.032978001	2.910856269	Thrsp; Cidec
GO:0001666	response to hypoxia	biological_process	1	20	268	19037	0.03175226	0.035063845	3.551679104	Adipoq
GO:0006886	intracellular protein transport	biological_process	1	20	271	19037	0.032407782	0.035678292	3.512361624	Cttn
GO:0010468	regulation of gene expression	biological_process	1	20	273	19037	0.032847802	0.036052466	3.486630037	Agt
GO:0032496	response to lipopolysaccharide	biological_process	1	20	283	19037	0.035083557	0.038389303	3.363427562	Mpo
GO:0045296	cadherin binding	molecular_function	1	20	298	19037	0.038546335	0.042050547	3.194127517	Cttn
GO:0007420	brain development	biological_process	1	20	318	19037	0.043360163	0.047159089	2.993238994	Cttn
GO:0016324	apical plasma membrane	cellular_component	1	20	330	19037	0.046352513	0.050261761	2.884393939	Cd300lg
GO:0006915	apoptotic process	biological_process	1	20	346	19037	0.050459165	0.054550449	2.751011561	Cidec
GO:0043231	intracellular membrane-bounded organelle	cellular_component	2	20	820	19037	0.052586951	0.056680546	2.321585366	Mpo; Cttn
GO:0008285	negative regulation of cell proliferation	biological_process	1	20	386	19037	0.061278897	0.065851949	2.465932642	Agt
GO:0006355	regulation of transcription, DNA-templated	biological_process	2	20	890	19037	0.064195789	0.068779627	2.138988764	Thrsp; Cidec
GO:0005102	signaling receptor binding	molecular_function	1	20	397	19037	0.064385373	0.068779627	2.397607053	Adipoq
GO:0042803	protein homodimerization activity	molecular_function	2	20	914	19037	0.068435932	0.072890342	2.082822757	Adipoq; Thrsp
GO:0010628	positive regulation of gene expression	biological_process	1	20	433	19037	0.074919105	0.079560111	2.198267898	Agt
GO:0030054	cell junction	cellular_component	1	20	448	19037	0.079465387	0.084139822	2.124665179	Cttn
GO:0042802	identical protein binding	molecular_function	2	20	1172	19037	0.121682731	0.128462707	1.624317406	Adipoq; Thrsp
GO:0055114	oxidation-reduction process	biological_process	1	20	589	19037	0.125999475	0.132631026	1.616044143	Mpo
GO:0045893	positive regulation of transcription, DNA-templated	biological_process	1	20	610	19037	0.13342276	0.14003555	1.560409836	Agt
GO:0009986	cell surface	cellular_component	1	20	632	19037	0.141311145	0.147883757	1.506091772	Adipoq
GO:0016020	membrane	cellular_component	2	20	1268	19037	0.144653743	0.150943036	1.501340694	Dgcr2; Pnpla3
GO:0005739	mitochondrion	cellular_component	2	20	1276	19037	0.146634571	0.152567762	1.4919279	Abhd10; Agt
GO:0048471	perinuclear region of cytoplasm	cellular_component	1	20	673	19037	0.156288037	0.162143208	1.414338782	Adipoq
GO:0032991	protein-containing complex	cellular_component	1	20	676	19037	0.15739688	0.162824359	1.40806213	Adipoq
GO:0008270	zinc ion binding	molecular_function	1	20	682	19037	0.159619535	0.164650523	1.395674487	Car3
GO:0005622	intracellular	cellular_component	1	20	880	19037	0.235737947	0.242473317	1.081647727	Cidec
GO:0005794	Golgi apparatus	cellular_component	1	20	917	19037	0.25034425	0.256763334	1.038004362	Cttn
GO:0005515	protein binding	molecular_function	2	20	1678	19037	0.256212876	0.262035896	1.134505364	Fabp4; Cttn
GO:0005634	nucleus	cellular_component	5	20	4735	19037	0.377648013	0.385136784	1.005121436	Fabp4; Retn; Thrsp; Cidec; Mpo
GO:0005737	cytoplasm	cellular_component	5	20	4763	19037	0.383598364	0.390100031	0.999212681	Agt; Gys2; Mpo; Pnpla3; Cttn
GO:0008150	biological_process	biological_process	1	20	1913	19037	0.611168148	0.61977615	0.497569263	Plin1
GO:0007186	G-protein coupled receptor signaling pathway	biological_process	1	20	1972	19037	0.628488089	0.635549753	0.482682556	Agt
GO:0005654	nucleoplasm	cellular_component	1	20	2021	19037	0.642453626	0.647852396	0.470979713	Thrsp
GO:0016021	integral component of membrane	cellular_component	4	20	5168	19037	0.667978704	0.671710429	0.736726006	RGD1561730; Slc36a2; Dgcr2; Cd300lg
GO:0003674	molecular_function	molecular_function	1	20	2382	19037	0.733742348	0.735786199	0.399601175	Plin1
GO:0005886	plasma membrane	cellular_component	2	20	4172	19037	0.846900848	0.846900848	0.456303931	Slc36a2; Cttn
GO:0001879	detection of yeast	biological_process	1	10	1	19037	0	0	1903.7	Cd209b
GO:0086069	bundle of His cell to Purkinje myocyte communication	biological_process	1	10	1	19037	0	0	1903.7	Tnni3k
GO:0042288	MHC class I protein binding	molecular_function	2	10	24	19037	2.10E-07	3.85E-06	158.6416667	RGD1561143; LOC100910669
GO:0001872	(1->3)-beta-D-glucan binding	molecular_function	1	10	2	19037	2.48E-07	3.85E-06	951.85	Cd209b
GO:0031013	troponin I binding	molecular_function	1	10	5	19037	2.48E-06	3.08E-05	380.74	Tnni3k
GO:1903779	regulation of cardiac conduction	biological_process	1	10	6	19037	3.72E-06	3.85E-05	317.2833333	Tnni3k
GO:0038094	Fc-gamma receptor signaling pathway	biological_process	1	10	10	19037	1.12E-05	9.88E-05	190.37	LOC100911825
GO:0016045	detection of bacterium	biological_process	1	10	11	19037	1.36E-05	0.000104966	173.0636364	Cd209b
GO:0042535	positive regulation of tumor necrosis factor biosynthetic process	biological_process	1	10	12	19037	1.63E-05	0.000104966	158.6416667	Cd209b
GO:0007169	transmembrane receptor protein tyrosine kinase signaling pathway	biological_process	2	10	101	19037	1.69E-05	0.000104966	37.6970297	RGD1561143; LOC100910669
GO:0006910	phagocytosis, recognition	biological_process	1	10	13	19037	1.93E-05	0.000108849	146.4384615	Cd209b
GO:0006120	mitochondrial electron transport, NADH to ubiquinone	biological_process	1	10	16	19037	2.97E-05	0.000148952	118.98125	Ndufa10l1
GO:0030247	polysaccharide binding	molecular_function	1	10	17	19037	3.36E-05	0.000148952	111.9823529	Cd209b
GO:0055117	regulation of cardiac muscle contraction	biological_process	1	10	17	19037	3.36E-05	0.000148952	111.9823529	Tnni3k
GO:0001618	virus receptor activity	molecular_function	1	10	21	19037	5.19E-05	0.000214425	90.65238095	Cd209b
GO:0005537	mannose binding	molecular_function	1	10	22	19037	5.70E-05	0.000221064	86.53181818	Cd209b
GO:0010765	positive regulation of sodium ion transport	biological_process	1	10	24	19037	6.81E-05	0.000248452	79.32083333	Cntn1
GO:0046718	viral entry into host cell	biological_process	1	10	33	19037	0.000129996	0.000447763	57.68787879	Cd209b
GO:0002027	regulation of heart rate	biological_process	1	10	36	19037	0.000154978	0.000505719	52.88055556	Tnni3k
GO:0032981	mitochondrial respiratory chain complex I assembly	biological_process	1	10	44	19037	0.000232192	0.000717203	43.26590909	Ndufa10l1
GO:0050766	positive regulation of phagocytosis	biological_process	1	10	45	19037	0.000242924	0.000717203	42.30444444	Cd209b
GO:0005747	mitochondrial respiratory chain complex I	cellular_component	1	10	47	19037	0.000265104	0.000747112	40.50425532	Ndufa10l1
GO:0031225	anchored component of membrane	cellular_component	1	10	52	19037	0.000324733	0.000875367	36.60961538	Cntn1
GO:0048306	calcium-dependent protein binding	molecular_function	1	10	70	19037	0.000588449	0.001520159	27.19571429	Cd209b
GO:0021549	cerebellum development	biological_process	1	10	72	19037	0.000622456	0.001543692	26.44027778	Cntn1
GO:0022625	cytosolic large ribosomal subunit	cellular_component	1	10	90	19037	0.000970419	0.002314076	21.15222222	Rpl39l
GO:0007219	Notch signaling pathway	biological_process	1	10	104	19037	0.001292685	0.002968389	18.30480769	Cntn1
GO:0050731	positive regulation of peptidyl-tyrosine phosphorylation	biological_process	1	10	107	19037	0.001367561	0.00302817	17.79158879	Cntn1
GO:0006897	endocytosis	biological_process	1	10	135	19037	0.002164145	0.004626793	14.10148148	Cd209b
GO:0010976	positive regulation of neuron projection development	biological_process	1	10	153	19037	0.002768159	0.005720861	12.44248366	Cntn1
GO:0031175	neuron projection development	biological_process	1	10	168	19037	0.003325485	0.006650971	11.33154762	Cntn1
GO:0005759	mitochondrial matrix	cellular_component	1	10	173	19037	0.003522045	0.006823963	11.00404624	Ndufa10l1
GO:0030246	carbohydrate binding	molecular_function	1	10	177	19037	0.003683148	0.006919854	10.75536723	Cntn1
GO:0043209	myelin sheath	cellular_component	1	10	191	19037	0.00427381	0.007793419	9.967015707	Cntn1
GO:0006412	translation	biological_process	1	10	203	19037	0.004812981	0.008525853	9.377832512	Rpl39l
GO:0004871	signal transducer activity	molecular_function	1	10	218	19037	0.00552912	0.009522374	8.732568807	Tnni3k
GO:0003735	structural constituent of ribosome	molecular_function	1	10	231	19037	0.006187229	0.010094953	8.241125541	Rpl39l
GO:0008022	protein C-terminus binding	molecular_function	1	10	231	19037	0.006187229	0.010094953	8.241125541	Tnni3k
GO:0004672	protein kinase activity	molecular_function	1	10	257	19037	0.007606107	0.01209176	7.407392996	Tnni3k
GO:0009897	external side of plasma membrane	cellular_component	1	10	288	19037	0.009472995	0.014454287	6.610069444	Cd209b
GO:0007155	cell adhesion	biological_process	1	10	292	19037	0.009727505	0.014454287	6.519520548	Cntn1
GO:0045121	membrane raft	cellular_component	1	10	293	19037	0.009791614	0.014454287	6.497269625	Cntn1
GO:0004674	protein serine/threonine kinase activity	molecular_function	1	10	333	19037	0.012511598	0.018039979	5.716816817	Tnni3k
GO:0007283	spermatogenesis	biological_process	1	10	375	19037	0.01568613	0.022103183	5.076533333	Rpl39l
GO:0035556	intracellular signal transduction	biological_process	1	10	428	19037	0.020138449	0.027742816	4.447897196	Tnni3k
GO:0010628	positive regulation of gene expression	biological_process	1	10	433	19037	0.02058338	0.027742816	4.396535797	Cntn1
GO:0003676	nucleic acid binding	molecular_function	1	10	450	19037	0.022127488	0.029189453	4.230444444	Zfp420
GO:0003723	RNA binding	molecular_function	1	10	477	19037	0.024677888	0.031875605	3.990985325	Rpl39l
GO:0006468	protein phosphorylation	biological_process	1	10	491	19037	0.026046773	0.032957141	3.877189409	Tnni3k
GO:0016021	integral component of membrane	cellular_component	5	10	5168	19037	0.02945	0.036518	1.841815015	LOC100911825; Cd209b; RGD1561143; Rprml; LOC100910669
GO:0007165	signal transduction	biological_process	1	10	697	19037	0.049568733	0.060260028	2.731276901	LOC100910669
GO:0003700	DNA binding transcription factor activity	molecular_function	1	10	726	19037	0.053346401	0.063605324	2.622176309	Zfp420
GO:0006355	regulation of transcription, DNA-templated	biological_process	1	10	890	19037	0.076582514	0.089587092	2.138988764	Zfp420
GO:0046872	metal ion binding	molecular_function	1	10	1291	19037	0.144041388	0.165380853	1.474593338	Tnni3k
GO:0005524	ATP binding	molecular_function	1	10	1365	19037	0.157727122	0.177801483	1.394652015	Tnni3k
GO:0005515	protein binding	molecular_function	1	10	1678	19037	0.218373146	0.241770269	1.134505364	Cntn1
GO:0008150	biological_process	biological_process	1	10	1913	19037	0.265784468	0.289098895	0.995138526	Zfp420
GO:0005575	cellular_component	cellular_component	1	10	2094	19037	0.302775393	0.323656454	0.909121299	Zfp420
GO:0003674	molecular_function	molecular_function	1	10	2382	19037	0.361597201	0.3799835	0.799202351	Zfp420
GO:0005634	nucleus	cellular_component	2	10	4735	19037	0.470597023	0.48628359	0.804097149	Zfp420; Tnni3k
GO:0005886	plasma membrane	cellular_component	1	10	4172	19037	0.679294689	0.690430667	0.456303931	Cntn1
GO:0005737	cytoplasm	cellular_component	1	10	4763	19037	0.756492172	0.756492172	0.399685072	Tnni3k
