# Supplementary material for: Comprehensive Analysis of the Profiles of Differentially Expressed mRNAs, lncRNAs, and circRNAs in Phosgene-Induced Acute Lung Injury
Source: Biomed Res Int. 2021 Jan 9;2021:6278526. doi: 10.1155/2021/6278526 (PMC7811572; doi:10.1155/2021/6278526)
Supplement: Supplementary 14 — Table S14: GO with differentially expressed lncRNAs between the B and C group. [file 6278526.f14.txt]

Table S14 GO with differentially expressed lncRNAs between B and C group
id	Term	Category	ListHits	ListTotal	PopHits	PopTotal	pValue	qValue	Enrichment_score	Gene
GO:0030896	checkpoint clamp complex	cellular_component	1	61	1	10019	0	0	164.2459016	NR_036653.1
GO:0044778	meiotic DNA integrity checkpoint	biological_process	1	61	1	10019	0	0	164.2459016	NR_036653.1
GO:0034190	apolipoprotein receptor binding	molecular_function	1	61	1	10019	0	0	164.2459016	XR_591499.1
GO:0098963	dendritic transport of messenger ribonucleoprotein complex	biological_process	1	61	1	10019	0	0	164.2459016	XR_591499.1
GO:0009007	site-specific DNA-methyltransferase (adenine-specific) activity	molecular_function	1	61	1	10019	0	0	164.2459016	ENSRNOT00000079914
GO:0032775	DNA methylation on adenine	biological_process	1	61	1	10019	0	0	164.2459016	ENSRNOT00000079914
GO:0000322	storage vacuole	cellular_component	1	61	1	10019	0	0	164.2459016	TCONS_00005424
GO:0070254	mucus secretion	biological_process	1	61	1	10019	0	0	164.2459016	TCONS_00005424
GO:1990226	histone methyltransferase binding	molecular_function	1	61	1	10019	0	0	164.2459016	TCONS_00005944
GO:0030204	chondroitin sulfate metabolic process	biological_process	1	61	1	10019	0	0	164.2459016	TCONS_00033624
GO:0033037	polysaccharide localization	biological_process	1	61	1	10019	0	0	164.2459016	TCONS_00033624
GO:0047756	chondroitin 4-sulfotransferase activity	molecular_function	1	61	1	10019	0	0	164.2459016	TCONS_00033624
GO:0060672	epithelial cell morphogenesis involved in placental branching	biological_process	2	61	2	10019	0	0	164.2459016	TCONS_00035038; TCONS_00035040
GO:0090132	epithelium migration	biological_process	2	61	2	10019	0	0	164.2459016	TCONS_00035038; TCONS_00035040
GO:0051973	positive regulation of telomerase activity	biological_process	6	61	42	10019	4.97E-09	2.26E-07	23.46370023	XR_593571.2; XR_593572.2; ENSRNOT00000092811; TCONS_00014328; TCONS_00035038; TCONS_00035040
GO:0042788	polysomal ribosome	cellular_component	3	61	15	10019	1.61E-06	6.87E-05	32.84918033	XR_595992.2; TCONS_00010992; TCONS_00010993
GO:0034329	cell junction assembly	biological_process	2	61	5	10019	2.13E-06	8.53E-05	65.69836066	TCONS_00035038; TCONS_00035040
GO:0005819	spindle	cellular_component	5	61	67	10019	2.96E-06	0.000112084	12.25715684	XR_593571.2; XR_593572.2; ENSRNOT00000092811; ENSRNOT00000025795; TCONS_00005944
GO:0030323	respiratory tube development	biological_process	2	61	6	10019	4.24E-06	0.000151965	54.74863388	TCONS_00035038; TCONS_00035040
GO:0005791	rough endoplasmic reticulum	cellular_component	5	61	81	10019	9.02E-06	0.000299241	10.1386359	XR_593571.2; XR_593572.2; ENSRNOT00000092811; TCONS_00010992; TCONS_00010993
GO:0000320	re-entry into mitotic cell cycle	biological_process	3	61	26	10019	1.68E-05	0.000299241	18.95145019	XR_593571.2; XR_593572.2; ENSRNOT00000092811
GO:0002904	positive regulation of B cell apoptotic process	biological_process	3	61	26	10019	1.68E-05	0.000299241	18.95145019	XR_593571.2; XR_593572.2; ENSRNOT00000092811
GO:0006848	pyruvate transport	biological_process	3	61	26	10019	1.68E-05	0.000299241	18.95145019	XR_593571.2; XR_593572.2; ENSRNOT00000092811
GO:0009812	flavonoid metabolic process	biological_process	3	61	26	10019	1.68E-05	0.000299241	18.95145019	XR_593571.2; XR_593572.2; ENSRNOT00000092811
GO:0019087	transformation of host cell by virus	biological_process	3	61	26	10019	1.68E-05	0.000299241	18.95145019	XR_593571.2; XR_593572.2; ENSRNOT00000092811
GO:0032986	protein-DNA complex disassembly	biological_process	3	61	26	10019	1.68E-05	0.000299241	18.95145019	XR_593571.2; XR_593572.2; ENSRNOT00000092811
GO:0044195	nucleoplasmic reticulum	cellular_component	3	61	26	10019	1.68E-05	0.000299241	18.95145019	XR_593571.2; XR_593572.2; ENSRNOT00000092811
GO:0045023	G0 to G1 transition	biological_process	3	61	26	10019	1.68E-05	0.000299241	18.95145019	XR_593571.2; XR_593572.2; ENSRNOT00000092811
GO:0046722	lactic acid secretion	biological_process	3	61	26	10019	1.68E-05	0.000299241	18.95145019	XR_593571.2; XR_593572.2; ENSRNOT00000092811
GO:0071378	cellular response to growth hormone stimulus	biological_process	3	61	26	10019	1.68E-05	0.000299241	18.95145019	XR_593571.2; XR_593572.2; ENSRNOT00000092811
GO:0071966	fungal-type cell wall polysaccharide metabolic process	biological_process	3	61	26	10019	1.68E-05	0.000299241	18.95145019	XR_593571.2; XR_593572.2; ENSRNOT00000092811
GO:0090096	positive regulation of metanephric cap mesenchymal cell proliferation	biological_process	3	61	26	10019	1.68E-05	0.000299241	18.95145019	XR_593571.2; XR_593572.2; ENSRNOT00000092811
GO:1903841	cellular response to arsenite(3-)	biological_process	3	61	26	10019	1.68E-05	0.000299241	18.95145019	XR_593571.2; XR_593572.2; ENSRNOT00000092811
GO:1904586	cellular response to putrescine	biological_process	3	61	26	10019	1.68E-05	0.000299241	18.95145019	XR_593571.2; XR_593572.2; ENSRNOT00000092811
GO:1904620	cellular response to dimethyl sulfoxide	biological_process	3	61	26	10019	1.68E-05	0.000299241	18.95145019	XR_593571.2; XR_593572.2; ENSRNOT00000092811
GO:1904628	cellular response to phorbol 13-acetate 12-myristate	biological_process	3	61	26	10019	1.68E-05	0.000299241	18.95145019	XR_593571.2; XR_593572.2; ENSRNOT00000092811
GO:1990858	cellular response to lectin	biological_process	3	61	26	10019	1.68E-05	0.000299241	18.95145019	XR_593571.2; XR_593572.2; ENSRNOT00000092811
GO:1990859	cellular response to endothelin	biological_process	3	61	26	10019	1.68E-05	0.000299241	18.95145019	XR_593571.2; XR_593572.2; ENSRNOT00000092811
GO:0003208	cardiac ventricle morphogenesis	biological_process	2	61	9	10019	1.76E-05	0.000299241	36.49908925	TCONS_00035038; TCONS_00035040
GO:0044030	regulation of DNA methylation	biological_process	2	61	9	10019	1.76E-05	0.000299241	36.49908925	TCONS_00035038; TCONS_00035040
GO:0071074	eukaryotic initiation factor eIF2 binding	molecular_function	3	61	27	10019	1.97E-05	0.000304205	18.24954463	XR_593571.2; XR_593572.2; ENSRNOT00000092811
GO:0071409	cellular response to cycloheximide	biological_process	3	61	27	10019	1.97E-05	0.000304205	18.24954463	XR_593571.2; XR_593572.2; ENSRNOT00000092811
GO:0071464	cellular response to hydrostatic pressure	biological_process	3	61	27	10019	1.97E-05	0.000304205	18.24954463	XR_593571.2; XR_593572.2; ENSRNOT00000092811
GO:1903862	positive regulation of oxidative phosphorylation	biological_process	3	61	27	10019	1.97E-05	0.000304205	18.24954463	XR_593571.2; XR_593572.2; ENSRNOT00000092811
GO:0071322	cellular response to carbohydrate stimulus	biological_process	3	61	28	10019	2.28E-05	0.000345443	17.59777518	XR_593571.2; XR_593572.2; ENSRNOT00000092811
GO:0045617	negative regulation of keratinocyte differentiation	biological_process	2	61	10	10019	2.50E-05	0.000370115	32.84918033	TCONS_00035038; TCONS_00035040
GO:0009405	pathogenesis	biological_process	3	61	29	10019	2.64E-05	0.000373963	16.99095534	XR_593571.2; XR_593572.2; ENSRNOT00000092811
GO:0044330	canonical Wnt signaling pathway involved in positive regulation of wound healing	biological_process	3	61	29	10019	2.64E-05	0.000373963	16.99095534	XR_593571.2; XR_593572.2; ENSRNOT00000092811
GO:0005635	nuclear envelope	cellular_component	5	61	98	10019	2.70E-05	0.000375248	8.379892941	XR_593571.2; XR_593572.2; ENSRNOT00000092811; ENSRNOT00000089565; ENSRNOT00000025795
GO:0006352	DNA-templated transcription, initiation	biological_process	3	61	30	10019	3.03E-05	0.000376252	16.42459016	XR_593571.2; XR_593572.2; ENSRNOT00000092811
GO:0032873	negative regulation of stress-activated MAPK cascade	biological_process	3	61	30	10019	3.03E-05	0.000376252	16.42459016	XR_593571.2; XR_593572.2; ENSRNOT00000092811
GO:0044337	canonical Wnt signaling pathway involved in positive regulation of apoptotic process	biological_process	3	61	30	10019	3.03E-05	0.000376252	16.42459016	XR_593571.2; XR_593572.2; ENSRNOT00000092811
GO:0045656	negative regulation of monocyte differentiation	biological_process	3	61	30	10019	3.03E-05	0.000376252	16.42459016	XR_593571.2; XR_593572.2; ENSRNOT00000092811
GO:0071394	cellular response to testosterone stimulus	biological_process	3	61	30	10019	3.03E-05	0.000376252	16.42459016	XR_593571.2; XR_593572.2; ENSRNOT00000092811
GO:0006289	nucleotide-excision repair	biological_process	2	61	11	10019	3.42E-05	0.000376252	29.86289121	NR_036653.1; XR_001841743.1
GO:0010918	positive regulation of mitochondrial membrane potential	biological_process	3	61	31	10019	3.46E-05	0.000376252	15.89476467	XR_593571.2; XR_593572.2; ENSRNOT00000092811
GO:0035457	cellular response to interferon-alpha	biological_process	3	61	31	10019	3.46E-05	0.000376252	15.89476467	XR_593571.2; XR_593572.2; ENSRNOT00000092811
GO:0044344	cellular response to fibroblast growth factor stimulus	biological_process	4	61	62	10019	3.51E-05	0.000376252	10.59650978	XR_593571.2; XR_593572.2; XR_001840384.1; ENSRNOT00000092811
GO:0019430	removal of superoxide radicals	biological_process	1	61	2	10019	3.65E-05	0.000376252	82.12295082	XR_001841743.1
GO:0033962	cytoplasmic mRNA processing body assembly	biological_process	1	61	2	10019	3.65E-05	0.000376252	82.12295082	TCONS_00003218
GO:0039529	RIG-I signaling pathway	biological_process	1	61	2	10019	3.65E-05	0.000376252	82.12295082	TCONS_00003218
GO:0043308	eosinophil degranulation	biological_process	1	61	2	10019	3.65E-05	0.000376252	82.12295082	TCONS_00005424
GO:0060627	regulation of vesicle-mediated transport	biological_process	1	61	2	10019	3.65E-05	0.000376252	82.12295082	TCONS_00005424
GO:1903421	regulation of synaptic vesicle recycling	biological_process	1	61	2	10019	3.65E-05	0.000376252	82.12295082	TCONS_00005424
GO:0005721	pericentric heterochromatin	cellular_component	1	61	2	10019	3.65E-05	0.000376252	82.12295082	TCONS_00005944
GO:0050992	dimethylallyl diphosphate biosynthetic process	biological_process	1	61	2	10019	3.65E-05	0.000376252	82.12295082	TCONS_00016893
GO:0007007	inner mitochondrial membrane organization	biological_process	3	61	32	10019	3.94E-05	0.00037759	15.39805328	XR_593571.2; XR_593572.2; ENSRNOT00000092811
GO:0032204	regulation of telomere maintenance	biological_process	3	61	32	10019	3.94E-05	0.00037759	15.39805328	XR_593571.2; XR_593572.2; ENSRNOT00000092811
GO:0044336	canonical Wnt signaling pathway involved in negative regulation of apoptotic process	biological_process	3	61	32	10019	3.94E-05	0.00037759	15.39805328	XR_593571.2; XR_593572.2; ENSRNOT00000092811
GO:0071391	cellular response to estrogen stimulus	biological_process	3	61	32	10019	3.94E-05	0.00037759	15.39805328	XR_593571.2; XR_593572.2; ENSRNOT00000092811
GO:1901857	positive regulation of cellular respiration	biological_process	3	61	32	10019	3.94E-05	0.00037759	15.39805328	XR_593571.2; XR_593572.2; ENSRNOT00000092811
GO:0021854	hypothalamus development	biological_process	3	61	33	10019	4.46E-05	0.000416003	14.9314456	XR_593571.2; XR_593572.2; ENSRNOT00000092811
GO:0044752	response to human chorionic gonadotropin	biological_process	3	61	33	10019	4.46E-05	0.000416003	14.9314456	XR_593571.2; XR_593572.2; ENSRNOT00000092811
GO:0006865	amino acid transport	biological_process	3	61	34	10019	5.03E-05	0.000456814	14.49228544	XR_593571.2; XR_593572.2; ENSRNOT00000092811
GO:0051782	negative regulation of cell division	biological_process	3	61	34	10019	5.03E-05	0.000456814	14.49228544	XR_593571.2; XR_593572.2; ENSRNOT00000092811
GO:0001783	B cell apoptotic process	biological_process	3	61	35	10019	5.65E-05	0.000493671	14.07822014	XR_593571.2; XR_593572.2; ENSRNOT00000092811
GO:0050910	detection of mechanical stimulus involved in sensory perception of sound	biological_process	3	61	35	10019	5.65E-05	0.000493671	14.07822014	XR_593571.2; XR_593572.2; ENSRNOT00000092811
GO:1990646	cellular response to prolactin	biological_process	3	61	35	10019	5.65E-05	0.000493671	14.07822014	XR_593571.2; XR_593572.2; ENSRNOT00000092811
GO:0097421	liver regeneration	biological_process	4	61	69	10019	5.90E-05	0.000508813	9.521501544	XR_593571.2; XR_593572.2; XR_595992.2; ENSRNOT00000092811
GO:0043279	response to alkaloid	biological_process	3	61	36	10019	6.33E-05	0.000539038	13.68715847	XR_593571.2; XR_593572.2; ENSRNOT00000092811
GO:0002082	regulation of oxidative phosphorylation	biological_process	3	61	37	10019	7.07E-05	0.000594207	13.31723527	XR_593571.2; XR_593572.2; ENSRNOT00000092811
GO:0071364	cellular response to epidermal growth factor stimulus	biological_process	4	61	73	10019	7.74E-05	0.000643067	8.999775432	XR_593571.2; XR_593572.2; XR_001840384.1; ENSRNOT00000092811
GO:0048705	skeletal system morphogenesis	biological_process	4	61	74	10019	8.27E-05	0.000678194	8.878156845	XR_593571.2; XR_593572.2; XR_001840384.1; ENSRNOT00000092811
GO:2000573	positive regulation of DNA biosynthetic process	biological_process	3	61	39	10019	8.72E-05	0.000706245	12.63430013	XR_593571.2; XR_593572.2; ENSRNOT00000092811
GO:0016485	protein processing	biological_process	4	61	75	10019	8.82E-05	0.000706245	8.759781421	XR_590319.2; XR_593571.2; XR_593572.2; ENSRNOT00000092811
GO:0006879	cellular iron ion homeostasis	biological_process	3	61	41	10019	0.000106419	0.000727504	12.0179928	XR_593571.2; XR_593572.2; ENSRNOT00000092811
GO:0046325	negative regulation of glucose import	biological_process	3	61	41	10019	0.000106419	0.000727504	12.0179928	XR_593571.2; XR_593572.2; ENSRNOT00000092811
GO:0005272	sodium channel activity	molecular_function	1	61	3	10019	0.000108965	0.000727504	54.74863388	XR_590452.1
GO:0034706	sodium channel complex	cellular_component	1	61	3	10019	0.000108965	0.000727504	54.74863388	XR_590452.1
GO:0033314	mitotic DNA replication checkpoint	biological_process	1	61	3	10019	0.000108965	0.000727504	54.74863388	NR_036653.1
GO:0098971	anterograde dendritic transport of neurotransmitter receptor complex	biological_process	1	61	3	10019	0.000108965	0.000727504	54.74863388	XR_591499.1
GO:0021503	neural fold bending	biological_process	1	61	3	10019	0.000108965	0.000727504	54.74863388	XR_592751.2
GO:0043240	Fanconi anaemia nuclear complex	cellular_component	1	61	3	10019	0.000108965	0.000727504	54.74863388	XR_001841743.1
GO:0000463	maturation of LSU-rRNA from tricistronic rRNA transcript (SSU-rRNA, 5.8S rRNA, LSU-rRNA)	biological_process	1	61	3	10019	0.000108965	0.000727504	54.74863388	XR_597441.1
GO:0043312	neutrophil degranulation	biological_process	1	61	3	10019	0.000108965	0.000727504	54.74863388	TCONS_00005424
GO:0043320	natural killer cell degranulation	biological_process	1	61	3	10019	0.000108965	0.000727504	54.74863388	TCONS_00005424
GO:0030277	maintenance of gastrointestinal epithelium	biological_process	1	61	3	10019	0.000108965	0.000727504	54.74863388	TCONS_00008895
GO:0042249	establishment of planar polarity of embryonic epithelium	biological_process	1	61	3	10019	0.000108965	0.000727504	54.74863388	TCONS_00016745
GO:0004452	isopentenyl-diphosphate delta-isomerase activity	molecular_function	1	61	3	10019	0.000108965	0.000727504	54.74863388	TCONS_00016893
GO:0009240	isopentenyl diphosphate biosynthetic process	biological_process	1	61	3	10019	0.000108965	0.000727504	54.74863388	TCONS_00016893
GO:0046903	secretion	biological_process	1	61	3	10019	0.000108965	0.000727504	54.74863388	TCONS_00030516
GO:0050659	N-acetylgalactosamine 4-sulfate 6-O-sulfotransferase activity	molecular_function	1	61	3	10019	0.000108965	0.000727504	54.74863388	TCONS_00033624
GO:0060252	positive regulation of glial cell proliferation	biological_process	3	61	42	10019	0.000117088	0.000774143	11.73185012	XR_593571.2; XR_593572.2; ENSRNOT00000092811
GO:0030728	ovulation	biological_process	3	61	45	10019	0.000153751	0.000978543	10.94972678	XR_593571.2; XR_593572.2; ENSRNOT00000092811
GO:0045821	positive regulation of glycolytic process	biological_process	3	61	45	10019	0.000153751	0.000978543	10.94972678	XR_593571.2; XR_593572.2; ENSRNOT00000092811
GO:0051276	chromosome organization	biological_process	3	61	45	10019	0.000153751	0.000978543	10.94972678	XR_593571.2; XR_593572.2; ENSRNOT00000092811
GO:2001022	positive regulation of response to DNA damage stimulus	biological_process	3	61	45	10019	0.000153751	0.000978543	10.94972678	XR_593571.2; XR_593572.2; ENSRNOT00000092811
GO:0001161	intronic transcription regulatory region sequence-specific DNA binding	molecular_function	2	61	18	10019	0.000164198	0.001025862	18.24954463	TCONS_00035038; TCONS_00035040
GO:0003382	epithelial cell morphogenesis	biological_process	2	61	18	10019	0.000164198	0.001025862	18.24954463	TCONS_00035038; TCONS_00035040
GO:0060487	lung epithelial cell differentiation	biological_process	2	61	19	10019	0.000194141	0.001103196	17.28904228	TCONS_00035038; TCONS_00035040
GO:0070830	bicellular tight junction assembly	biological_process	2	61	19	10019	0.000194141	0.001103196	17.28904228	TCONS_00035038; TCONS_00035040
GO:0000987	proximal promoter sequence-specific DNA binding	molecular_function	3	61	48	10019	0.000198073	0.001103196	10.26536885	XR_593571.2; XR_593572.2; ENSRNOT00000092811
GO:1904385	cellular response to angiotensin	biological_process	3	61	48	10019	0.000198073	0.001103196	10.26536885	XR_593571.2; XR_593572.2; ENSRNOT00000092811
GO:2001235	positive regulation of apoptotic signaling pathway	biological_process	3	61	48	10019	0.000198073	0.001103196	10.26536885	XR_593571.2; XR_593572.2; ENSRNOT00000092811
GO:0035861	site of double-strand break	cellular_component	1	61	4	10019	0.000217075	0.001103196	41.06147541	NR_036653.1
GO:0098964	anterograde dendritic transport of messenger ribonucleoprotein complex	biological_process	1	61	4	10019	0.000217075	0.001103196	41.06147541	XR_591499.1
GO:0007525	somatic muscle development	biological_process	1	61	4	10019	0.000217075	0.001103196	41.06147541	XR_001839513.1
GO:0090249	regulation of cell motility involved in somitogenic axis elongation	biological_process	1	61	4	10019	0.000217075	0.001103196	41.06147541	XR_001839513.1
GO:0002357	defense response to tumor cell	biological_process	1	61	4	10019	0.000217075	0.001103196	41.06147541	XR_001839610.1
GO:0005584	collagen type I trimer	cellular_component	1	61	4	10019	0.000217075	0.001103196	41.06147541	XR_001840384.1
GO:0034505	tooth mineralization	biological_process	1	61	4	10019	0.000217075	0.001103196	41.06147541	XR_001840384.1
GO:0072540	T-helper 17 cell lineage commitment	biological_process	1	61	4	10019	0.000217075	0.001103196	41.06147541	XR_595558.2
GO:0097180	serine protease inhibitor complex	cellular_component	1	61	4	10019	0.000217075	0.001103196	41.06147541	XR_001841893.1
GO:0050819	negative regulation of coagulation	biological_process	1	61	4	10019	0.000217075	0.001103196	41.06147541	XR_597429.2
GO:0008327	methyl-CpG binding	molecular_function	1	61	4	10019	0.000217075	0.001103196	41.06147541	XR_362560.3
GO:0061886	negative regulation of mini excitatory postsynaptic potential	biological_process	1	61	4	10019	0.000217075	0.001103196	41.06147541	ENSRNOT00000025795
GO:0099149	regulation of postsynaptic neurotransmitter receptor internalization	biological_process	1	61	4	10019	0.000217075	0.001103196	41.06147541	ENSRNOT00000025795
GO:1903353	regulation of nucleus organization	biological_process	1	61	4	10019	0.000217075	0.001103196	41.06147541	ENSRNOT00000025795
GO:0070032	synaptobrevin 2-SNAP-25-syntaxin-1a-complexin I complex	cellular_component	1	61	4	10019	0.000217075	0.001103196	41.06147541	TCONS_00005424
GO:0070044	synaptobrevin 2-SNAP-25-syntaxin-1a complex	cellular_component	1	61	4	10019	0.000217075	0.001103196	41.06147541	TCONS_00005424
GO:0001940	male pronucleus	cellular_component	1	61	4	10019	0.000217075	0.001103196	41.06147541	TCONS_00005944
GO:0003691	double-stranded telomeric DNA binding	molecular_function	1	61	4	10019	0.000217075	0.001103196	41.06147541	TCONS_00014328
GO:0006278	RNA-dependent DNA biosynthetic process	biological_process	1	61	4	10019	0.000217075	0.001103196	41.06147541	TCONS_00014328
GO:0047288	monosialoganglioside sialyltransferase activity	molecular_function	1	61	4	10019	0.000217075	0.001103196	41.06147541	TCONS_00037056
GO:0002053	positive regulation of mesenchymal cell proliferation	biological_process	4	61	91	10019	0.000220484	0.00111222	7.219600072	XR_593571.2; XR_593572.2; ENSRNOT00000092811; ENSRNOT00000025795
GO:0005719	nuclear euchromatin	cellular_component	3	61	50	10019	0.000232315	0.001163284	9.854754098	XR_593571.2; XR_593572.2; ENSRNOT00000092811
GO:0036120	cellular response to platelet-derived growth factor stimulus	biological_process	3	61	51	10019	0.000250945	0.001247397	9.661523626	XR_593571.2; XR_593572.2; ENSRNOT00000092811
GO:0060463	lung lobe morphogenesis	biological_process	2	61	21	10019	0.000264167	0.001303607	15.64246682	TCONS_00035038; TCONS_00035040
GO:2001171	positive regulation of ATP biosynthetic process	biological_process	3	61	53	10019	0.000291392	0.001427611	9.296937829	XR_593571.2; XR_593572.2; ENSRNOT00000092811
GO:0060548	negative regulation of cell death	biological_process	4	61	100	10019	0.000342327	0.001584098	6.569836066	XR_593571.2; XR_593572.2; ENSRNOT00000092811; TCONS_00032521
GO:0008143	poly(A) binding	molecular_function	2	61	23	10019	0.000348722	0.001584098	14.28225232	XR_001839610.1; ENSRNOT00000082248
GO:0071300	cellular response to retinoic acid	biological_process	4	61	101	10019	0.000358487	0.001584098	6.504788184	XR_593571.2; XR_593572.2; XR_001840384.1; ENSRNOT00000092811
GO:0044691	tooth eruption	biological_process	1	61	5	10019	0.000360373	0.001584098	32.84918033	XR_001840384.1
GO:0071306	cellular response to vitamin E	biological_process	1	61	5	10019	0.000360373	0.001584098	32.84918033	XR_001840384.1
GO:0008467	[heparan sulfate]-glucosamine 3-sulfotransferase 1 activity	molecular_function	1	61	5	10019	0.000360373	0.001584098	32.84918033	XR_597429.2
GO:0046596	regulation of viral entry into host cell	biological_process	1	61	5	10019	0.000360373	0.001584098	32.84918033	XR_597429.2
GO:0042288	MHC class I protein binding	molecular_function	1	61	5	10019	0.000360373	0.001584098	32.84918033	ENSRNOT00000077381
GO:0090292	nuclear matrix anchoring at nuclear membrane	biological_process	1	61	5	10019	0.000360373	0.001584098	32.84918033	ENSRNOT00000025795
GO:0060340	positive regulation of type I interferon-mediated signaling pathway	biological_process	1	61	5	10019	0.000360373	0.001584098	32.84918033	TCONS_00003218
GO:0003720	telomerase activity	molecular_function	1	61	5	10019	0.000360373	0.001584098	32.84918033	TCONS_00014328
GO:0035634	response to stilbenoid	biological_process	1	61	5	10019	0.000360373	0.001584098	32.84918033	TCONS_00016893
GO:0097352	autophagosome maturation	biological_process	1	61	5	10019	0.000360373	0.001584098	32.84918033	TCONS_00020266
GO:0010332	response to gamma radiation	biological_process	3	61	56	10019	0.000360551	0.001584098	8.798887588	XR_593571.2; XR_593572.2; ENSRNOT00000092811
GO:0043388	positive regulation of DNA binding	biological_process	3	61	56	10019	0.000360551	0.001584098	8.798887588	XR_593571.2; XR_593572.2; ENSRNOT00000092811
GO:0070491	repressing transcription factor binding	molecular_function	3	61	56	10019	0.000360551	0.001584098	8.798887588	XR_593571.2; XR_593572.2; ENSRNOT00000092811
GO:0034644	cellular response to UV	biological_process	3	61	60	10019	0.000470082	0.002013369	8.212295082	XR_593571.2; XR_593572.2; ENSRNOT00000092811
GO:0043473	pigmentation	biological_process	3	61	60	10019	0.000470082	0.002013369	8.212295082	XR_593571.2; XR_593572.2; ENSRNOT00000092811
GO:0048147	negative regulation of fibroblast proliferation	biological_process	3	61	60	10019	0.000470082	0.002013369	8.212295082	XR_593571.2; XR_593572.2; ENSRNOT00000092811
GO:0000785	chromatin	cellular_component	3	61	60	10019	0.000470082	0.002013369	8.212295082	XR_001841743.1; TCONS_00005944; TCONS_00007918
GO:0042474	middle ear morphogenesis	biological_process	3	61	61	10019	0.000500794	0.002071621	8.077667294	XR_593571.2; XR_593572.2; ENSRNOT00000092811
GO:0008283	cell proliferation	biological_process	6	61	233	10019	0.000503749	0.002071621	4.229508197	XR_593571.2; XR_593572.2; ENSRNOT00000092811; ENSRNOT00000089565; TCONS_00035038; TCONS_00035040
GO:0002028	regulation of sodium ion transport	biological_process	2	61	26	10019	0.000505347	0.002071621	12.63430013	XR_590452.1; XR_001836837.1
GO:0008266	poly(U) RNA binding	molecular_function	2	61	26	10019	0.000505347	0.002071621	12.63430013	XR_001839610.1; XR_595992.2
GO:0070371	ERK1 and ERK2 cascade	biological_process	3	61	62	10019	0.00053291	0.002071621	7.947382337	XR_593571.2; XR_593572.2; ENSRNOT00000092811
GO:0042733	embryonic digit morphogenesis	biological_process	3	61	62	10019	0.00053291	0.002071621	7.947382337	TCONS_00033624; TCONS_00035038; TCONS_00035040
GO:0050891	multicellular organismal water homeostasis	biological_process	1	61	6	10019	0.000538439	0.002071621	27.37431694	XR_590452.1
GO:0031573	intra-S DNA damage checkpoint	biological_process	1	61	6	10019	0.000538439	0.002071621	27.37431694	NR_036653.1
GO:0001754	eye photoreceptor cell differentiation	biological_process	1	61	6	10019	0.000538439	0.002071621	27.37431694	XR_001839513.1
GO:0006477	protein sulfation	biological_process	1	61	6	10019	0.000538439	0.002071621	27.37431694	XR_597429.2
GO:0035493	SNARE complex assembly	biological_process	1	61	6	10019	0.000538439	0.002071621	27.37431694	TCONS_00005424
GO:0070033	synaptobrevin 2-SNAP-25-syntaxin-1a-complexin II complex	cellular_component	1	61	6	10019	0.000538439	0.002071621	27.37431694	TCONS_00005424
GO:0098967	exocytic insertion of neurotransmitter receptor to postsynaptic membrane	biological_process	1	61	6	10019	0.000538439	0.002071621	27.37431694	TCONS_00005424
GO:0001939	female pronucleus	cellular_component	1	61	6	10019	0.000538439	0.002071621	27.37431694	TCONS_00005944
GO:0010369	chromocenter	cellular_component	1	61	6	10019	0.000538439	0.002071621	27.37431694	TCONS_00005944
GO:0005677	chromatin silencing complex	cellular_component	1	61	6	10019	0.000538439	0.002071621	27.37431694	TCONS_00007918
GO:0019752	carboxylic acid metabolic process	biological_process	1	61	6	10019	0.000538439	0.002071621	27.37431694	TCONS_00032521
GO:0030206	chondroitin sulfate biosynthetic process	biological_process	1	61	6	10019	0.000538439	0.002071621	27.37431694	TCONS_00033624
GO:0000784	nuclear chromosome, telomeric region	cellular_component	2	61	27	10019	0.000566058	0.00216565	12.16636308	TCONS_00005944; TCONS_00014328
GO:0043085	positive regulation of catalytic activity	biological_process	3	61	64	10019	0.000601498	0.002288379	7.699026639	XR_593571.2; XR_593572.2; ENSRNOT00000092811
GO:0000932	P-body	cellular_component	2	61	28	10019	0.000631246	0.00237502	11.73185012	ENSRNOT00000025795; TCONS_00003218
GO:0060324	face development	biological_process	2	61	28	10019	0.000631246	0.00237502	11.73185012	TCONS_00035038; TCONS_00035040
GO:0043280	positive regulation of cysteine-type endopeptidase activity involved in apoptotic process	biological_process	3	61	67	10019	0.000715814	0.002482211	7.354294103	XR_593571.2; XR_593572.2; ENSRNOT00000092811
GO:0032902	nerve growth factor production	biological_process	1	61	7	10019	0.00075086	0.002482211	23.46370023	XR_590319.2
GO:0055078	sodium ion homeostasis	biological_process	1	61	7	10019	0.00075086	0.002482211	23.46370023	XR_590452.1
GO:0035253	ciliary rootlet	cellular_component	1	61	7	10019	0.00075086	0.002482211	23.46370023	XR_591499.1
GO:0048188	Set1C/COMPASS complex	cellular_component	1	61	7	10019	0.00075086	0.002482211	23.46370023	XR_595348.1
GO:0000957	mitochondrial RNA catabolic process	biological_process	1	61	7	10019	0.00075086	0.002482211	23.46370023	XR_595992.2
GO:0000962	positive regulation of mitochondrial RNA catabolic process	biological_process	1	61	7	10019	0.00075086	0.002482211	23.46370023	XR_595992.2
GO:0000963	mitochondrial RNA processing	biological_process	1	61	7	10019	0.00075086	0.002482211	23.46370023	XR_595992.2
GO:0000964	mitochondrial RNA 5'-end processing	biological_process	1	61	7	10019	0.00075086	0.002482211	23.46370023	XR_595992.2
GO:0000965	mitochondrial RNA 3'-end processing	biological_process	1	61	7	10019	0.00075086	0.002482211	23.46370023	XR_595992.2
GO:0004654	polyribonucleotide nucleotidyltransferase activity	molecular_function	1	61	7	10019	0.00075086	0.002482211	23.46370023	XR_595992.2
GO:0035927	RNA import into mitochondrion	biological_process	1	61	7	10019	0.00075086	0.002482211	23.46370023	XR_595992.2
GO:0035928	rRNA import into mitochondrion	biological_process	1	61	7	10019	0.00075086	0.002482211	23.46370023	XR_595992.2
GO:0043457	regulation of cellular respiration	biological_process	1	61	7	10019	0.00075086	0.002482211	23.46370023	XR_595992.2
GO:0045025	mitochondrial degradosome	cellular_component	1	61	7	10019	0.00075086	0.002482211	23.46370023	XR_595992.2
GO:0097222	mitochondrial mRNA polyadenylation	biological_process	1	61	7	10019	0.00075086	0.002482211	23.46370023	XR_595992.2
GO:0002262	myeloid cell homeostasis	biological_process	1	61	7	10019	0.00075086	0.002482211	23.46370023	XR_001841743.1
GO:1901796	regulation of signal transduction by p53 class mediator	biological_process	1	61	7	10019	0.00075086	0.002482211	23.46370023	XR_597441.1
GO:1902570	protein localization to nucleolus	biological_process	1	61	7	10019	0.00075086	0.002482211	23.46370023	XR_597441.1
GO:0034993	meiotic nuclear membrane microtubule tethering complex	cellular_component	1	61	7	10019	0.00075086	0.002482211	23.46370023	ENSRNOT00000025795
GO:0090286	cytoskeletal anchoring at nuclear membrane	biological_process	1	61	7	10019	0.00075086	0.002482211	23.46370023	ENSRNOT00000025795
GO:0008299	isoprenoid biosynthetic process	biological_process	1	61	7	10019	0.00075086	0.002482211	23.46370023	TCONS_00016893
GO:0004089	carbonate dehydratase activity	molecular_function	1	61	7	10019	0.00075086	0.002482211	23.46370023	TCONS_00030516
GO:0006730	one-carbon metabolic process	biological_process	1	61	7	10019	0.00075086	0.002482211	23.46370023	TCONS_00030516
GO:0009247	glycolipid biosynthetic process	biological_process	1	61	7	10019	0.00075086	0.002482211	23.46370023	TCONS_00037056
GO:0008630	intrinsic apoptotic signaling pathway in response to DNA damage	biological_process	3	61	70	10019	0.000844729	0.002765674	7.03911007	XR_593571.2; XR_593572.2; ENSRNOT00000092811
GO:0070888	E-box binding	molecular_function	3	61	70	10019	0.000844729	0.002765674	7.03911007	XR_593571.2; XR_593572.2; ENSRNOT00000092811
GO:0032091	negative regulation of protein binding	biological_process	3	61	71	10019	0.000891115	0.00288976	6.939967675	XR_593571.2; XR_593572.2; ENSRNOT00000092811
GO:0033613	activating transcription factor binding	molecular_function	3	61	71	10019	0.000891115	0.00288976	6.939967675	XR_593571.2; XR_593572.2; ENSRNOT00000092811
GO:0014911	positive regulation of smooth muscle cell migration	biological_process	3	61	72	10019	0.000939271	0.003004907	6.843579235	XR_593571.2; XR_593572.2; ENSRNOT00000092811
GO:0001658	branching involved in ureteric bud morphogenesis	biological_process	3	61	73	10019	0.000989233	0.003004907	6.749831574	XR_593571.2; XR_593572.2; ENSRNOT00000092811
GO:0007354	zygotic determination of anterior/posterior axis, embryo	biological_process	1	61	8	10019	0.000997223	0.003004907	20.5307377	XR_590319.2
GO:0032940	secretion by cell	biological_process	1	61	8	10019	0.000997223	0.003004907	20.5307377	XR_590319.2
GO:0048406	nerve growth factor binding	molecular_function	1	61	8	10019	0.000997223	0.003004907	20.5307377	XR_590319.2
GO:0050909	sensory perception of taste	biological_process	1	61	8	10019	0.000997223	0.003004907	20.5307377	XR_590452.1
GO:0060351	cartilage development involved in endochondral bone morphogenesis	biological_process	1	61	8	10019	0.000997223	0.003004907	20.5307377	XR_001840384.1
GO:0000958	mitochondrial mRNA catabolic process	biological_process	1	61	8	10019	0.000997223	0.003004907	20.5307377	XR_595992.2
GO:0045926	negative regulation of growth	biological_process	1	61	8	10019	0.000997223	0.003004907	20.5307377	XR_595992.2
GO:0071042	nuclear polyadenylation-dependent mRNA catabolic process	biological_process	1	61	8	10019	0.000997223	0.003004907	20.5307377	XR_595992.2
GO:0008097	5S rRNA binding	molecular_function	1	61	8	10019	0.000997223	0.003004907	20.5307377	XR_597441.1
GO:1902259	regulation of delayed rectifier potassium channel activity	biological_process	1	61	8	10019	0.000997223	0.003004907	20.5307377	TCONS_00005424
GO:1903593	regulation of histamine secretion by mast cell	biological_process	1	61	8	10019	0.000997223	0.003004907	20.5307377	TCONS_00005424
GO:0009101	glycoprotein biosynthetic process	biological_process	1	61	8	10019	0.000997223	0.003004907	20.5307377	TCONS_00037056
GO:0030259	lipid glycosylation	biological_process	1	61	8	10019	0.000997223	0.003004907	20.5307377	TCONS_00037056
GO:1990743	protein sialylation	biological_process	1	61	8	10019	0.000997223	0.003004907	20.5307377	TCONS_00037056
GO:0008544	epidermis development	biological_process	2	61	33	10019	0.001028805	0.003086415	9.954297069	TCONS_00035038; TCONS_00035040
GO:0035914	skeletal muscle cell differentiation	biological_process	3	61	74	10019	0.001041037	0.003095836	6.658617634	XR_593571.2; XR_593572.2; ENSRNOT00000092811
GO:0045787	positive regulation of cell cycle	biological_process	3	61	74	10019	0.001041037	0.003095836	6.658617634	XR_593571.2; XR_593572.2; ENSRNOT00000092811
GO:0032355	response to estradiol	biological_process	5	61	194	10019	0.001118077	0.003297855	4.233141795	XR_593571.2; XR_593572.2; XR_001840384.1; ENSRNOT00000077086; ENSRNOT00000092811
GO:0007281	germ cell development	biological_process	2	61	34	10019	0.001123498	0.003297855	9.661523626	XR_001841743.1; TCONS_00004008
GO:0010494	cytoplasmic stress granule	cellular_component	2	61	34	10019	0.001123498	0.003297855	9.661523626	TCONS_00003218; TCONS_00004008
GO:0006919	activation of cysteine-type endopeptidase activity involved in apoptotic process	biological_process	3	61	76	10019	0.001150321	0.003362097	6.483390854	XR_593571.2; XR_593572.2; ENSRNOT00000092811
GO:0016486	peptide hormone processing	biological_process	1	61	9	10019	0.001277122	0.003638997	18.24954463	XR_590319.2
GO:0032964	collagen biosynthetic process	biological_process	1	61	9	10019	0.001277122	0.003638997	18.24954463	XR_001840384.1
GO:2000627	positive regulation of miRNA catabolic process	biological_process	1	61	9	10019	0.001277122	0.003638997	18.24954463	XR_595992.2
GO:0071470	cellular response to osmotic stress	biological_process	1	61	9	10019	0.001277122	0.003638997	18.24954463	XR_001841893.1
GO:0009956	radial pattern formation	biological_process	1	61	9	10019	0.001277122	0.003638997	18.24954463	ENSRNOT00000077086
GO:0048703	embryonic viscerocranium morphogenesis	biological_process	1	61	9	10019	0.001277122	0.003638997	18.24954463	TCONS_00033624
GO:0001701	in utero embryonic development	biological_process	6	61	274	10019	0.001308155	0.00371189	3.596625583	XR_593571.2; XR_593572.2; ENSRNOT00000077086; ENSRNOT00000092811; TCONS_00035038; TCONS_00035040
GO:0006006	glucose metabolic process	biological_process	3	61	81	10019	0.001458353	0.004120906	6.083181542	XR_593571.2; XR_593572.2; ENSRNOT00000092811
GO:0071346	cellular response to interferon-gamma	biological_process	3	61	82	10019	0.001526223	0.004263362	6.008996401	XR_593571.2; XR_593572.2; ENSRNOT00000092811
GO:0002181	cytoplasmic translation	biological_process	2	61	38	10019	0.001556717	0.004263362	8.644521139	TCONS_00010992; TCONS_00010993
GO:0021915	neural tube development	biological_process	2	61	38	10019	0.001556717	0.004263362	8.644521139	TCONS_00035038; TCONS_00035040
GO:0048407	platelet-derived growth factor binding	molecular_function	1	61	10	10019	0.001590153	0.004263362	16.42459016	XR_001840384.1
GO:0070208	protein heterotrimerization	biological_process	1	61	10	10019	0.001590153	0.004263362	16.42459016	XR_001840384.1
GO:0032740	positive regulation of interleukin-17 production	biological_process	1	61	10	10019	0.001590153	0.004263362	16.42459016	XR_595558.2
GO:0043631	RNA polyadenylation	biological_process	1	61	10	10019	0.001590153	0.004263362	16.42459016	XR_595992.2
GO:0000027	ribosomal large subunit assembly	biological_process	1	61	10	10019	0.001590153	0.004263362	16.42459016	XR_597441.1
GO:0007097	nuclear migration	biological_process	1	61	10	10019	0.001590153	0.004263362	16.42459016	ENSRNOT00000025795
GO:0017145	stem cell division	biological_process	1	61	10	10019	0.001590153	0.004263362	16.42459016	TCONS_00004008
GO:0043229	intracellular organelle	cellular_component	1	61	10	10019	0.001590153	0.004263362	16.42459016	TCONS_00005424
GO:0001537	N-acetylgalactosamine 4-O-sulfotransferase activity	molecular_function	1	61	10	10019	0.001590153	0.004263362	16.42459016	TCONS_00033624
GO:0016051	carbohydrate biosynthetic process	biological_process	1	61	10	10019	0.001590153	0.004263362	16.42459016	TCONS_00033624
GO:0009314	response to radiation	biological_process	3	61	84	10019	0.001668518	0.004455926	5.865925059	XR_593571.2; XR_593572.2; ENSRNOT00000092811
GO:0007050	cell cycle arrest	biological_process	3	61	87	10019	0.001898899	0.005031899	5.663651781	XR_593571.2; XR_593572.2; ENSRNOT00000092811
GO:0051028	mRNA transport	biological_process	1	61	11	10019	0.001935914	0.005031899	14.9314456	XR_591499.1
GO:0060019	radial glial cell differentiation	biological_process	1	61	11	10019	0.001935914	0.005031899	14.9314456	XR_592789.2
GO:0061014	positive regulation of mRNA catabolic process	biological_process	1	61	11	10019	0.001935914	0.005031899	14.9314456	XR_595992.2
GO:2001054	negative regulation of mesenchymal cell apoptotic process	biological_process	1	61	11	10019	0.001935914	0.005031899	14.9314456	ENSRNOT00000025795
GO:0090316	positive regulation of intracellular protein transport	biological_process	1	61	11	10019	0.001935914	0.005031899	14.9314456	TCONS_00005424
GO:0035563	positive regulation of chromatin binding	biological_process	1	61	11	10019	0.001935914	0.005031899	14.9314456	TCONS_00014328
GO:0001541	ovarian follicle development	biological_process	3	61	89	10019	0.002064199	0.005344942	5.536378707	XR_593571.2; XR_593572.2; ENSRNOT00000092811
GO:0031490	chromatin DNA binding	molecular_function	2	61	43	10019	0.002228685	0.005588086	7.639344262	TCONS_00035038; TCONS_00035040
GO:0016779	nucleotidyltransferase activity	molecular_function	1	61	12	10019	0.002314009	0.005588086	13.68715847	XR_001836830.1
GO:0005890	sodium:potassium-exchanging ATPase complex	cellular_component	1	61	12	10019	0.002314009	0.005588086	13.68715847	XR_001836837.1
GO:0015988	energy coupled proton transmembrane transport, against electrochemical gradient	biological_process	1	61	12	10019	0.002314009	0.005588086	13.68715847	XR_001836837.1
GO:0031947	negative regulation of glucocorticoid biosynthetic process	biological_process	1	61	12	10019	0.002314009	0.005588086	13.68715847	XR_001836837.1
GO:0045989	positive regulation of striated muscle contraction	biological_process	1	61	12	10019	0.002314009	0.005588086	13.68715847	XR_001836837.1
GO:0090662	ATP hydrolysis coupled transmembrane transport	biological_process	1	61	12	10019	0.002314009	0.005588086	13.68715847	XR_001836837.1
GO:0048489	synaptic vesicle transport	biological_process	1	61	12	10019	0.002314009	0.005588086	13.68715847	XR_591499.1
GO:0060840	artery development	biological_process	1	61	12	10019	0.002314009	0.005588086	13.68715847	XR_592751.2
GO:1902618	cellular response to fluoride	biological_process	1	61	12	10019	0.002314009	0.005588086	13.68715847	XR_001840384.1
GO:0051568	histone H3-K4 methylation	biological_process	1	61	12	10019	0.002314009	0.005588086	13.68715847	XR_595348.1
GO:2000772	regulation of cellular senescence	biological_process	1	61	12	10019	0.002314009	0.005588086	13.68715847	XR_595992.2
GO:0007276	gamete generation	biological_process	1	61	12	10019	0.002314009	0.005588086	13.68715847	XR_001841743.1
GO:0019843	rRNA binding	molecular_function	1	61	12	10019	0.002314009	0.005588086	13.68715847	XR_597441.1
GO:0001893	maternal placenta development	biological_process	1	61	12	10019	0.002314009	0.005588086	13.68715847	ENSRNOT00000077086
GO:0017091	AU-rich element binding	molecular_function	1	61	12	10019	0.002314009	0.005588086	13.68715847	TCONS_00004008
GO:0017156	calcium ion regulated exocytosis	biological_process	1	61	12	10019	0.002314009	0.005588086	13.68715847	TCONS_00005424
GO:0006695	cholesterol biosynthetic process	biological_process	1	61	12	10019	0.002314009	0.005588086	13.68715847	TCONS_00016893
GO:0032421	stereocilium bundle	cellular_component	1	61	12	10019	0.002314009	0.005588086	13.68715847	TCONS_00038021
GO:0003690	double-stranded DNA binding	molecular_function	4	61	154	10019	0.002392798	0.005757935	4.266127315	XR_593571.2; XR_593572.2; ENSRNOT00000092811; TCONS_00003218
GO:0071407	cellular response to organic cyclic compound	biological_process	3	61	93	10019	0.002424207	0.005812976	5.298254892	XR_593571.2; XR_593572.2; ENSRNOT00000092811
GO:0043565	sequence-specific DNA binding	molecular_function	9	61	581	10019	0.00245613	0.005868859	2.544256652	XR_593571.2; XR_593572.2; XR_362560.3; ENSRNOT00000077086; ENSRNOT00000092811; TCONS_00014328; TCONS_00016745; TCONS_00035038; TCONS_00035040
GO:0048701	embryonic cranial skeleton morphogenesis	biological_process	2	61	46	10019	0.00270614	0.006122359	7.141126158	TCONS_00035038; TCONS_00035040
GO:0035690	cellular response to drug	biological_process	3	61	96	10019	0.002721064	0.006122359	5.132684426	XR_593571.2; XR_593572.2; ENSRNOT00000092811
GO:0009100	glycoprotein metabolic process	biological_process	1	61	13	10019	0.002724045	0.006122359	12.63430013	XR_590319.2
GO:0015280	ligand-gated sodium channel activity	molecular_function	1	61	13	10019	0.002724045	0.006122359	12.63430013	XR_590452.1
GO:0035313	wound healing, spreading of epidermal cells	biological_process	1	61	13	10019	0.002724045	0.006122359	12.63430013	XR_590452.1
GO:0050699	WW domain binding	molecular_function	1	61	13	10019	0.002724045	0.006122359	12.63430013	XR_590452.1
GO:0001957	intramembranous ossification	biological_process	1	61	13	10019	0.002724045	0.006122359	12.63430013	XR_001840384.1
GO:0010812	negative regulation of cell-substrate adhesion	biological_process	1	61	13	10019	0.002724045	0.006122359	12.63430013	XR_001840384.1
GO:0031960	response to corticosteroid	biological_process	1	61	13	10019	0.002724045	0.006122359	12.63430013	XR_001840384.1
GO:0006401	RNA catabolic process	biological_process	1	61	13	10019	0.002724045	0.006122359	12.63430013	XR_595992.2
GO:0003084	positive regulation of systemic arterial blood pressure	biological_process	1	61	13	10019	0.002724045	0.006122359	12.63430013	ENSRNOT00000077086
GO:0060707	trophoblast giant cell differentiation	biological_process	1	61	13	10019	0.002724045	0.006122359	12.63430013	ENSRNOT00000077086
GO:0048260	positive regulation of receptor-mediated endocytosis	biological_process	1	61	13	10019	0.002724045	0.006122359	12.63430013	ENSRNOT00000025795
GO:0030285	integral component of synaptic vesicle membrane	cellular_component	1	61	13	10019	0.002724045	0.006122359	12.63430013	TCONS_00005424
GO:0048806	genitalia development	biological_process	1	61	13	10019	0.002724045	0.006122359	12.63430013	TCONS_00016745
GO:0036342	post-anal tail morphogenesis	biological_process	1	61	13	10019	0.002724045	0.006122359	12.63430013	TCONS_00033624
GO:0002024	diet induced thermogenesis	biological_process	1	61	13	10019	0.002724045	0.006122359	12.63430013	TCONS_00038021
GO:0060088	auditory receptor cell stereocilium organization	biological_process	1	61	13	10019	0.002724045	0.006122359	12.63430013	TCONS_00038021
GO:0060070	canonical Wnt signaling pathway	biological_process	3	61	98	10019	0.002932283	0.006568699	5.027935764	XR_593571.2; XR_593572.2; ENSRNOT00000092811
GO:0016604	nuclear body	cellular_component	4	61	162	10019	0.002980041	0.006653796	4.055454361	XR_593571.2; XR_593572.2; ENSRNOT00000092811; TCONS_00014328
GO:0007346	regulation of mitotic cell cycle	biological_process	3	61	99	10019	0.00304199	0.00676992	4.977148535	XR_593571.2; XR_593572.2; ENSRNOT00000092811
GO:1903416	response to glycoside	biological_process	1	61	14	10019	0.003165631	0.006865589	11.73185012	XR_001836837.1
GO:0038063	collagen-activated tyrosine kinase receptor signaling pathway	biological_process	1	61	14	10019	0.003165631	0.006865589	11.73185012	XR_001840384.1
GO:0043589	skin morphogenesis	biological_process	1	61	14	10019	0.003165631	0.006865589	11.73185012	XR_001840384.1
GO:1902617	response to fluoride	biological_process	1	61	14	10019	0.003165631	0.006865589	11.73185012	XR_001840384.1
GO:0034046	poly(G) binding	molecular_function	1	61	14	10019	0.003165631	0.006865589	11.73185012	XR_595992.2
GO:0015015	heparan sulfate proteoglycan biosynthetic process, enzymatic modification	biological_process	1	61	14	10019	0.003165631	0.006865589	11.73185012	XR_597429.2
GO:0060849	regulation of transcription involved in lymphatic endothelial cell fate commitment	biological_process	1	61	14	10019	0.003165631	0.006865589	11.73185012	ENSRNOT00000077086
GO:0005697	telomerase holoenzyme complex	cellular_component	1	61	14	10019	0.003165631	0.006865589	11.73185012	TCONS_00014328
GO:0008104	protein localization	biological_process	2	61	49	10019	0.003242249	0.007009434	6.703914353	XR_591499.1; TCONS_00038021
GO:0032869	cellular response to insulin stimulus	biological_process	4	61	166	10019	0.003309878	0.007132996	3.95773257	XR_593571.2; XR_593572.2; ENSRNOT00000092811; TCONS_00005424
GO:0009611	response to wounding	biological_process	3	61	104	10019	0.003632886	0.007600422	4.737862547	XR_593571.2; XR_593572.2; ENSRNOT00000092811
GO:0005391	sodium:potassium-exchanging ATPase activity	molecular_function	1	61	15	10019	0.003638381	0.007600422	10.94972678	XR_001836837.1
GO:0010248	establishment or maintenance of transmembrane electrochemical gradient	biological_process	1	61	15	10019	0.003638381	0.007600422	10.94972678	XR_001836837.1
GO:0036376	sodium ion export across plasma membrane	biological_process	1	61	15	10019	0.003638381	0.007600422	10.94972678	XR_001836837.1
GO:0035925	mRNA 3'-UTR AU-rich region binding	molecular_function	1	61	15	10019	0.003638381	0.007600422	10.94972678	XR_001839610.1
GO:0060674	placenta blood vessel development	biological_process	1	61	15	10019	0.003638381	0.007600422	10.94972678	ENSRNOT00000077086
GO:0032212	positive regulation of telomere maintenance via telomerase	biological_process	1	61	15	10019	0.003638381	0.007600422	10.94972678	TCONS_00014328
GO:0017048	Rho GTPase binding	molecular_function	1	61	15	10019	0.003638381	0.007600422	10.94972678	TCONS_00034937
GO:0003836	beta-galactoside (CMP) alpha-2,3-sialyltransferase activity	molecular_function	1	61	15	10019	0.003638381	0.007600422	10.94972678	TCONS_00037056
GO:0034707	chloride channel complex	cellular_component	1	61	15	10019	0.003638381	0.007600422	10.94972678	TCONS_00038021
GO:0030659	cytoplasmic vesicle membrane	cellular_component	2	61	52	10019	0.003839217	0.007995434	6.317150063	XR_590452.1; TCONS_00005424
GO:0048146	positive regulation of fibroblast proliferation	biological_process	3	61	106	10019	0.003889642	0.008051204	4.648468914	XR_593571.2; XR_593572.2; ENSRNOT00000092811
GO:0050679	positive regulation of epithelial cell proliferation	biological_process	3	61	106	10019	0.003889642	0.008051204	4.648468914	XR_593571.2; XR_593572.2; ENSRNOT00000092811
GO:0030955	potassium ion binding	molecular_function	1	61	16	10019	0.004141912	0.00825629	10.26536885	XR_001836837.1
GO:1990239	steroid hormone binding	molecular_function	1	61	16	10019	0.004141912	0.00825629	10.26536885	XR_001836837.1
GO:0048512	circadian behavior	biological_process	1	61	16	10019	0.004141912	0.00825629	10.26536885	XR_592789.2
GO:0060346	bone trabecula formation	biological_process	1	61	16	10019	0.004141912	0.00825629	10.26536885	XR_001840384.1
GO:0042800	histone methyltransferase activity (H3-K4 specific)	molecular_function	1	61	16	10019	0.004141912	0.00825629	10.26536885	XR_595348.1
GO:0000175	3'-5'-exoribonuclease activity	molecular_function	1	61	16	10019	0.004141912	0.00825629	10.26536885	XR_595992.2
GO:0035198	miRNA binding	molecular_function	1	61	16	10019	0.004141912	0.00825629	10.26536885	XR_595992.2
GO:0044327	dendritic spine head	cellular_component	1	61	16	10019	0.004141912	0.00825629	10.26536885	ENSRNOT00000025795
GO:0051642	centrosome localization	biological_process	1	61	16	10019	0.004141912	0.00825629	10.26536885	ENSRNOT00000025795
GO:0006342	chromatin silencing	biological_process	1	61	16	10019	0.004141912	0.00825629	10.26536885	TCONS_00007918
GO:0048596	embryonic camera-type eye morphogenesis	biological_process	1	61	16	10019	0.004141912	0.00825629	10.26536885	TCONS_00016745
GO:0004364	glutathione transferase activity	molecular_function	1	61	16	10019	0.004141912	0.00825629	10.26536885	TCONS_00038021
GO:0003729	mRNA binding	molecular_function	3	61	108	10019	0.004158454	0.00825629	4.562386157	XR_593571.2; XR_593572.2; ENSRNOT00000092811
GO:0006338	chromatin remodeling	biological_process	3	61	108	10019	0.004158454	0.00825629	4.562386157	XR_593571.2; XR_593572.2; ENSRNOT00000092811
GO:0048568	embryonic organ development	biological_process	2	61	54	10019	0.004272016	0.008457102	6.083181542	TCONS_00035038; TCONS_00035040
GO:0030007	cellular potassium ion homeostasis	biological_process	1	61	17	10019	0.004675843	0.009020536	9.661523626	XR_001836837.1
GO:0060081	membrane hyperpolarization	biological_process	1	61	17	10019	0.004675843	0.009020536	9.661523626	XR_001836837.1
GO:0046543	development of secondary female sexual characteristics	biological_process	1	61	17	10019	0.004675843	0.009020536	9.661523626	XR_355004.2
GO:0008168	methyltransferase activity	molecular_function	1	61	17	10019	0.004675843	0.009020536	9.661523626	ENSRNOT00000079914
GO:0005521	lamin binding	molecular_function	1	61	17	10019	0.004675843	0.009020536	9.661523626	ENSRNOT00000025795
GO:0005484	SNAP receptor activity	molecular_function	1	61	17	10019	0.004675843	0.009020536	9.661523626	TCONS_00005424
GO:0042589	zymogen granule membrane	cellular_component	1	61	17	10019	0.004675843	0.009020536	9.661523626	TCONS_00005424
GO:0042162	telomeric DNA binding	molecular_function	1	61	17	10019	0.004675843	0.009020536	9.661523626	TCONS_00014328
GO:0006749	glutathione metabolic process	biological_process	1	61	17	10019	0.004675843	0.009020536	9.661523626	TCONS_00038021
GO:0000165	MAPK cascade	biological_process	3	61	112	10019	0.004733292	0.009079921	4.399443794	XR_593571.2; XR_593572.2; ENSRNOT00000092811
GO:0007605	sensory perception of sound	biological_process	3	61	112	10019	0.004733292	0.009079921	4.399443794	XR_001840384.1; XR_001841893.1; TCONS_00038021
GO:0016055	Wnt signaling pathway	biological_process	3	61	113	10019	0.004884942	0.00934451	4.360510663	XR_593571.2; XR_593572.2; ENSRNOT00000092811
GO:0045893	positive regulation of transcription, DNA-templated	biological_process	9	61	645	10019	0.005190733	0.00980303	2.291803279	XR_593571.2; XR_593572.2; XR_001840384.1; ENSRNOT00000077086; ENSRNOT00000092811; TCONS_00014328; TCONS_00016745; TCONS_00035038; TCONS_00035040
GO:0048661	positive regulation of smooth muscle cell proliferation	biological_process	3	61	115	10019	0.005197991	0.00980303	4.284675695	XR_593571.2; XR_593572.2; ENSRNOT00000092811
GO:0034599	cellular response to oxidative stress	biological_process	2	61	58	10019	0.005223693	0.00980303	5.663651781	XR_595992.2; XR_001841743.1
GO:0055119	relaxation of cardiac muscle	biological_process	1	61	18	10019	0.005239799	0.00980303	9.124772313	XR_001836837.1
GO:0001972	retinoic acid binding	molecular_function	1	61	18	10019	0.005239799	0.00980303	9.124772313	ENSRNOT00000077086
GO:0045736	negative regulation of cyclin-dependent protein serine/threonine kinase activity	biological_process	1	61	18	10019	0.005239799	0.00980303	9.124772313	ENSRNOT00000077086
GO:0017022	myosin binding	molecular_function	1	61	18	10019	0.005239799	0.00980303	9.124772313	TCONS_00005424
GO:0048566	embryonic digestive tract development	biological_process	1	61	18	10019	0.005239799	0.00980303	9.124772313	TCONS_00016745
GO:0044877	protein-containing complex binding	molecular_function	5	61	269	10019	0.005713121	0.010650266	3.0528978	XR_593571.2; XR_593572.2; ENSRNOT00000092811; TCONS_00005424; TCONS_00014328
GO:0045822	negative regulation of heart contraction	biological_process	1	61	19	10019	0.005833405	0.010650266	8.644521139	XR_001836837.1
GO:0045823	positive regulation of heart contraction	biological_process	1	61	19	10019	0.005833405	0.010650266	8.644521139	XR_001836837.1
GO:0008574	ATP-dependent microtubule motor activity, plus-end-directed	molecular_function	1	61	19	10019	0.005833405	0.010650266	8.644521139	XR_591499.1
GO:0001945	lymph vessel development	biological_process	1	61	19	10019	0.005833405	0.010650266	8.644521139	ENSRNOT00000077086
GO:0030017	sarcomere	cellular_component	1	61	19	10019	0.005833405	0.010650266	8.644521139	ENSRNOT00000025795
GO:0042692	muscle cell differentiation	biological_process	1	61	19	10019	0.005833405	0.010650266	8.644521139	ENSRNOT00000025795
GO:0017157	regulation of exocytosis	biological_process	1	61	19	10019	0.005833405	0.010650266	8.644521139	TCONS_00005424
GO:0031507	heterochromatin assembly	biological_process	1	61	19	10019	0.005833405	0.010650266	8.644521139	TCONS_00007918
GO:0016192	vesicle-mediated transport	biological_process	2	61	61	10019	0.006014779	0.010952043	5.385111529	TCONS_00005424; TCONS_00032521
GO:0071347	cellular response to interleukin-1	biological_process	3	61	120	10019	0.00603893	0.010966698	4.106147541	XR_593571.2; XR_593572.2; ENSRNOT00000092811
GO:0005730	nucleolus	cellular_component	7	61	458	10019	0.006277275	0.011369213	2.51030854	XR_593571.2; XR_593572.2; XR_597441.1; XR_362560.3; ENSRNOT00000089581; ENSRNOT00000092811; ENSRNOT00000025795
GO:0015991	ATP hydrolysis coupled proton transport	biological_process	1	61	20	10019	0.006456293	0.011539989	8.212295082	XR_001836837.1
GO:0060170	ciliary membrane	cellular_component	1	61	20	10019	0.006456293	0.011539989	8.212295082	XR_592789.2
GO:0030199	collagen fibril organization	biological_process	1	61	20	10019	0.006456293	0.011539989	8.212295082	XR_001840384.1
GO:0090503	RNA phosphodiester bond hydrolysis, exonucleolytic	biological_process	1	61	20	10019	0.006456293	0.011539989	8.212295082	XR_595992.2
GO:0048814	regulation of dendrite morphogenesis	biological_process	1	61	20	10019	0.006456293	0.011539989	8.212295082	ENSRNOT00000025795
GO:0006814	sodium ion transport	biological_process	2	61	64	10019	0.006873889	0.012254236	5.132684426	XR_590452.1; XR_001836837.1
GO:0030705	cytoskeleton-dependent intracellular transport	biological_process	1	61	21	10019	0.007108096	0.01254045	7.821233411	XR_591499.1
GO:0035097	histone methyltransferase complex	cellular_component	1	61	21	10019	0.007108096	0.01254045	7.821233411	XR_595348.1
GO:0017075	syntaxin-1 binding	molecular_function	1	61	21	10019	0.007108096	0.01254045	7.821233411	TCONS_00005424
GO:0043001	Golgi to plasma membrane protein transport	biological_process	1	61	21	10019	0.007108096	0.01254045	7.821233411	TCONS_00005424
GO:0010468	regulation of gene expression	biological_process	5	61	284	10019	0.007397145	0.013016682	2.891653198	XR_593571.2; XR_593572.2; ENSRNOT00000092811; TCONS_00035038; TCONS_00035040
GO:0006883	cellular sodium ion homeostasis	biological_process	1	61	22	10019	0.00778845	0.013326469	7.465722802	XR_001836837.1
GO:0030506	ankyrin binding	molecular_function	1	61	22	10019	0.00778845	0.013326469	7.465722802	XR_001836837.1
GO:0031402	sodium ion binding	molecular_function	1	61	22	10019	0.00778845	0.013326469	7.465722802	XR_001836837.1
GO:1990573	potassium ion import across plasma membrane	biological_process	1	61	22	10019	0.00778845	0.013326469	7.465722802	XR_001836837.1
GO:0046034	ATP metabolic process	biological_process	1	61	22	10019	0.00778845	0.013326469	7.465722802	XR_591499.1
GO:0051482	positive regulation of cytosolic calcium ion concentration involved in phospholipase C-activating G-protein coupled signaling pathway	biological_process	1	61	22	10019	0.00778845	0.013326469	7.465722802	XR_592789.2
GO:0035458	cellular response to interferon-beta	biological_process	1	61	22	10019	0.00778845	0.013326469	7.465722802	XR_595992.2
GO:0048854	brain morphogenesis	biological_process	1	61	22	10019	0.00778845	0.013326469	7.465722802	XR_001841743.1
GO:0097150	neuronal stem cell population maintenance	biological_process	1	61	22	10019	0.00778845	0.013326469	7.465722802	XR_001841743.1
GO:0061025	membrane fusion	biological_process	1	61	22	10019	0.00778845	0.013326469	7.465722802	TCONS_00005424
GO:0002021	response to dietary excess	biological_process	1	61	22	10019	0.00778845	0.013326469	7.465722802	TCONS_00038021
GO:0031012	extracellular matrix	cellular_component	3	61	131	10019	0.008197911	0.013991923	3.761356526	XR_590319.2; XR_001838081.1; XR_001840384.1
GO:0005581	collagen trimer	cellular_component	1	61	23	10019	0.008496996	0.014394165	7.141126158	XR_001840384.1
GO:0070584	mitochondrion morphogenesis	biological_process	1	61	23	10019	0.008496996	0.014394165	7.141126158	XR_595992.2
GO:0002063	chondrocyte development	biological_process	1	61	23	10019	0.008496996	0.014394165	7.141126158	TCONS_00033624
GO:0071383	cellular response to steroid hormone stimulus	biological_process	1	61	24	10019	0.009233376	0.015373909	6.843579235	XR_001836837.1
GO:0086009	membrane repolarization	biological_process	1	61	24	10019	0.009233376	0.015373909	6.843579235	XR_001836837.1
GO:0001958	endochondral ossification	biological_process	1	61	24	10019	0.009233376	0.015373909	6.843579235	XR_001840384.1
GO:0006402	mRNA catabolic process	biological_process	1	61	24	10019	0.009233376	0.015373909	6.843579235	XR_595992.2
GO:0009312	oligosaccharide biosynthetic process	biological_process	1	61	24	10019	0.009233376	0.015373909	6.843579235	TCONS_00037056
GO:0032580	Golgi cisterna membrane	cellular_component	1	61	24	10019	0.009233376	0.015373909	6.843579235	TCONS_00037056
GO:0005244	voltage-gated ion channel activity	molecular_function	1	61	24	10019	0.009233376	0.015373909	6.843579235	TCONS_00038021
GO:0010629	negative regulation of gene expression	biological_process	4	61	214	10019	0.009574286	0.015902655	3.070016853	XR_593571.2; XR_593572.2; XR_001839610.1; ENSRNOT00000092811
GO:0046983	protein dimerization activity	molecular_function	3	61	138	10019	0.009806475	0.016248684	3.570563079	XR_593571.2; XR_593572.2; ENSRNOT00000092811
GO:0005758	mitochondrial intermembrane space	cellular_component	1	61	25	10019	0.009997237	0.016405104	6.569836066	XR_595992.2
GO:0060416	response to growth hormone	biological_process	1	61	25	10019	0.009997237	0.016405104	6.569836066	XR_595992.2
GO:1902017	regulation of cilium assembly	biological_process	1	61	25	10019	0.009997237	0.016405104	6.569836066	ENSRNOT00000025795
GO:0032420	stereocilium	cellular_component	1	61	25	10019	0.009997237	0.016405104	6.569836066	TCONS_00038021
GO:0042273	ribosomal large subunit biogenesis	biological_process	1	61	26	10019	0.010788227	0.017618184	6.317150063	XR_597441.1
GO:0002009	morphogenesis of an epithelium	biological_process	1	61	26	10019	0.010788227	0.017618184	6.317150063	TCONS_00030516
GO:0051591	response to cAMP	biological_process	2	61	76	10019	0.011016711	0.017948277	4.322260569	XR_001840384.1; XR_595992.2
GO:0002026	regulation of the force of heart contraction	biological_process	1	61	27	10019	0.011606001	0.018729115	6.083181542	XR_001836837.1
GO:0000159	protein phosphatase type 2A complex	cellular_component	1	61	27	10019	0.011606001	0.018729115	6.083181542	XR_001839513.1
GO:0005201	extracellular matrix structural constituent	molecular_function	1	61	27	10019	0.011606001	0.018729115	6.083181542	XR_001840384.1
GO:0005254	chloride channel activity	molecular_function	1	61	27	10019	0.011606001	0.018729115	6.083181542	TCONS_00038021
GO:0001843	neural tube closure	biological_process	2	61	79	10019	0.012234373	0.019696472	4.158124092	TCONS_00035038; TCONS_00035040
GO:0032839	dendrite cytoplasm	cellular_component	1	61	28	10019	0.012450213	0.019856194	5.865925059	XR_591499.1
GO:0003727	single-stranded RNA binding	molecular_function	1	61	28	10019	0.012450213	0.019856194	5.865925059	TCONS_00003218
GO:0031201	SNARE complex	cellular_component	1	61	28	10019	0.012450213	0.019856194	5.865925059	TCONS_00005424
GO:0007585	respiratory gaseous exchange	biological_process	1	61	28	10019	0.012450213	0.019856194	5.865925059	TCONS_00033624
GO:0030141	secretory granule	cellular_component	2	61	81	10019	0.013087487	0.020823782	4.055454361	XR_001840384.1; TCONS_00005424
GO:0086004	regulation of cardiac muscle cell contraction	biological_process	1	61	29	10019	0.013320522	0.021145164	5.663651781	XR_001836837.1
GO:0003735	structural constituent of ribosome	molecular_function	2	61	82	10019	0.013526523	0.021422237	4.005997601	TCONS_00010992; TCONS_00010993
GO:0016791	phosphatase activity	molecular_function	1	61	30	10019	0.01421659	0.022256316	5.474863388	XR_001836837.1
GO:0043531	ADP binding	molecular_function	1	61	30	10019	0.01421659	0.022256316	5.474863388	XR_001836837.1
GO:0008146	sulfotransferase activity	molecular_function	1	61	30	10019	0.01421659	0.022256316	5.474863388	TCONS_00033624
GO:0048365	Rac GTPase binding	molecular_function	1	61	30	10019	0.01421659	0.022256316	5.474863388	TCONS_00034937
GO:0050890	cognition	biological_process	1	61	30	10019	0.01421659	0.022256316	5.474863388	TCONS_00037056
GO:0035264	multicellular organism growth	biological_process	2	61	84	10019	0.014429662	0.022538074	3.910616706	TCONS_00035038; TCONS_00035040
GO:0071456	cellular response to hypoxia	biological_process	3	61	155	10019	0.014532514	0.022646779	3.178952935	XR_593571.2; XR_593572.2; ENSRNOT00000092811
GO:0003730	mRNA 3'-UTR binding	molecular_function	1	61	31	10019	0.015138082	0.023218544	5.298254892	XR_001839610.1
GO:0060325	face morphogenesis	biological_process	1	61	31	10019	0.015138082	0.023218544	5.298254892	XR_001840384.1
GO:0071850	mitotic cell cycle arrest	biological_process	1	61	31	10019	0.015138082	0.023218544	5.298254892	XR_595992.2
GO:0000775	chromosome, centromeric region	cellular_component	1	61	31	10019	0.015138082	0.023218544	5.298254892	TCONS_00005944
GO:0008373	sialyltransferase activity	molecular_function	1	61	31	10019	0.015138082	0.023218544	5.298254892	TCONS_00037056
GO:0009311	oligosaccharide metabolic process	biological_process	1	61	31	10019	0.015138082	0.023218544	5.298254892	TCONS_00037056
GO:0097503	sialylation	biological_process	1	61	31	10019	0.015138082	0.023218544	5.298254892	TCONS_00037056
GO:0034504	protein localization to nucleus	biological_process	1	61	32	10019	0.016084665	0.024450127	5.132684426	XR_001840384.1
GO:0055093	response to hyperoxia	biological_process	1	61	32	10019	0.016084665	0.024450127	5.132684426	XR_001840384.1
GO:0070207	protein homotrimerization	biological_process	1	61	32	10019	0.016084665	0.024450127	5.132684426	XR_595992.2
GO:0060173	limb development	biological_process	1	61	32	10019	0.016084665	0.024450127	5.132684426	ENSRNOT00000077086
GO:0042493	response to drug	biological_process	6	61	436	10019	0.016178755	0.024538379	2.260264701	XR_001836837.1; XR_593571.2; XR_593572.2; XR_001840384.1; ENSRNOT00000092811; TCONS_00030516
GO:0009566	fertilization	biological_process	1	61	33	10019	0.017056011	0.025640493	4.977148535	ENSRNOT00000077086
GO:0003725	double-stranded RNA binding	molecular_function	1	61	33	10019	0.017056011	0.025640493	4.977148535	TCONS_00003218
GO:0016079	synaptic vesicle exocytosis	biological_process	1	61	33	10019	0.017056011	0.025640493	4.977148535	TCONS_00005424
GO:0005793	endoplasmic reticulum-Golgi intermediate compartment	cellular_component	1	61	33	10019	0.017056011	0.025640493	4.977148535	TCONS_00032521
GO:0001228	transcriptional activator activity, RNA polymerase II transcription regulatory region sequence-specific DNA binding	molecular_function	3	61	163	10019	0.017181484	0.025772226	3.022930705	TCONS_00016745; TCONS_00035038; TCONS_00035040
GO:0000724	double-strand break repair via homologous recombination	biological_process	1	61	34	10019	0.018051793	0.026899936	4.830761813	NR_036653.1
GO:0010107	potassium ion import	biological_process	1	61	34	10019	0.018051793	0.026899936	4.830761813	XR_001836837.1
GO:0008045	motor neuron axon guidance	biological_process	1	61	34	10019	0.018051793	0.026899936	4.830761813	XR_591499.1
GO:0000790	nuclear chromatin	cellular_component	3	61	167	10019	0.018612347	0.027674691	2.950525179	XR_593571.2; XR_593572.2; ENSRNOT00000092811
GO:0048704	embryonic skeletal system morphogenesis	biological_process	1	61	35	10019	0.019071688	0.028173144	4.692740047	TCONS_00033624
GO:0007266	Rho protein signal transduction	biological_process	1	61	35	10019	0.019071688	0.028173144	4.692740047	TCONS_00034937
GO:0006821	chloride transport	biological_process	1	61	35	10019	0.019071688	0.028173144	4.692740047	TCONS_00038021
GO:0043010	camera-type eye development	biological_process	2	61	94	10019	0.019451335	0.028671774	3.494593652	TCONS_00035038; TCONS_00035040
GO:0030136	clathrin-coated vesicle	cellular_component	1	61	36	10019	0.020115375	0.029586545	4.562386157	TCONS_00005424
GO:0090263	positive regulation of canonical Wnt signaling pathway	biological_process	2	61	96	10019	0.020557592	0.03017181	3.421789617	XR_001839513.1; XR_001840384.1
GO:0048545	response to steroid hormone	biological_process	1	61	37	10019	0.021182538	0.030967525	4.439078423	XR_001840384.1
GO:0005654	nucleoplasm	cellular_component	14	61	1423	10019	0.0211907	0.030967525	1.615911892	XR_001835535.1; XR_355004.2; XR_593571.2; XR_593572.2; XR_595348.1; XR_001840908.1; XR_362560.3; ENSRNOT00000077086; ENSRNOT00000092811; ENSRNOT00000025795; TCONS_00007918; TCONS_00014328; TCONS_00035038; TCONS_00035040
GO:0006974	cellular response to DNA damage stimulus	biological_process	3	61	175	10019	0.02169194	0.031632144	2.815644028	XR_593571.2; XR_593572.2; ENSRNOT00000092811
GO:0030667	secretory granule membrane	cellular_component	1	61	38	10019	0.022272861	0.032409869	4.322260569	TCONS_00005424
GO:0015031	protein transport	biological_process	3	61	177	10019	0.02250789	0.032682032	2.783828841	XR_001840384.1; TCONS_00005424; TCONS_00032521
GO:0004867	serine-type endopeptidase inhibitor activity	molecular_function	1	61	39	10019	0.023386034	0.033812928	4.211433375	XR_001841893.1
GO:0016787	hydrolase activity	molecular_function	1	61	39	10019	0.023386034	0.033812928	4.211433375	TCONS_00016893
GO:0045471	response to ethanol	biological_process	3	61	181	10019	0.024195765	0.034909568	2.722307762	XR_593571.2; XR_593572.2; ENSRNOT00000092811
GO:0007368	determination of left/right symmetry	biological_process	1	61	40	10019	0.024521746	0.03515644	4.106147541	XR_590319.2
GO:0060048	cardiac muscle contraction	biological_process	1	61	40	10019	0.024521746	0.03515644	4.106147541	XR_001836837.1
GO:0048589	developmental growth	biological_process	1	61	40	10019	0.024521746	0.03515644	4.106147541	TCONS_00033624
GO:0036464	cytoplasmic ribonucleoprotein granule	cellular_component	1	61	41	10019	0.025679692	0.036662202	4.005997601	TCONS_00003218
GO:0060291	long-term synaptic potentiation	biological_process	1	61	41	10019	0.025679692	0.036662202	4.005997601	TCONS_00005424
GO:0071260	cellular response to mechanical stimulus	biological_process	2	61	106	10019	0.026601126	0.037898257	3.098979276	XR_001836837.1; XR_001840384.1
GO:0003674	molecular_function	molecular_function	13	61	1339	10019	0.027857794	0.039605758	1.594620404	NR_036653.1; XR_001838375.1; XR_357874.3; XR_001841743.1; XR_362560.3; TCONS_00004008; TCONS_00008895; TCONS_00016745; TCONS_00020266; TCONS_00030516; TCONS_00032521; TCONS_00035038; TCONS_00035040
GO:0030522	intracellular receptor signaling pathway	biological_process	1	61	43	10019	0.028061075	0.03981165	3.819672131	ENSRNOT00000077086
GO:0042981	regulation of apoptotic process	biological_process	3	61	190	10019	0.028269566	0.040024063	2.593356342	XR_593571.2; XR_593572.2; ENSRNOT00000092811
GO:0002020	protease binding	molecular_function	2	61	110	10019	0.029257454	0.041203193	2.986289121	XR_001840384.1; XR_001841893.1
GO:0005871	kinesin complex	cellular_component	1	61	44	10019	0.029283914	0.041203193	3.732861401	XR_591499.1
GO:0018279	protein N-linked glycosylation via asparagine	biological_process	1	61	44	10019	0.029283914	0.041203193	3.732861401	TCONS_00037056
GO:0044306	neuron projection terminus	cellular_component	1	61	45	10019	0.030527789	0.042776594	3.649908925	TCONS_00005424
GO:0030145	manganese ion binding	molecular_function	1	61	45	10019	0.030527789	0.042776594	3.649908925	TCONS_00016893
GO:0008217	regulation of blood pressure	biological_process	1	61	46	10019	0.03179241	0.044094972	3.570563079	XR_001836837.1
GO:0016311	dephosphorylation	biological_process	1	61	46	10019	0.03179241	0.044094972	3.570563079	XR_001836837.1
GO:0043548	phosphatidylinositol 3-kinase binding	molecular_function	1	61	46	10019	0.03179241	0.044094972	3.570563079	XR_001836837.1
GO:0006906	vesicle fusion	biological_process	1	61	46	10019	0.03179241	0.044094972	3.570563079	TCONS_00005424
GO:0006914	autophagy	biological_process	1	61	46	10019	0.03179241	0.044094972	3.570563079	TCONS_00020266
GO:0007420	brain development	biological_process	4	61	297	10019	0.034137074	0.047250706	2.212066015	ENSRNOT00000025795; TCONS_00032521; TCONS_00035038; TCONS_00035040
GO:0048514	blood vessel morphogenesis	biological_process	1	61	48	10019	0.034382729	0.047494195	3.421789617	ENSRNOT00000077086
GO:0004175	endopeptidase activity	molecular_function	1	61	49	10019	0.035707855	0.048927665	3.351957176	XR_590319.2
GO:0010718	positive regulation of epithelial to mesenchymal transition	biological_process	1	61	49	10019	0.035707855	0.048927665	3.351957176	XR_001840384.1
GO:0043588	skin development	biological_process	1	61	49	10019	0.035707855	0.048927665	3.351957176	XR_001840384.1
GO:0004879	nuclear receptor activity	molecular_function	1	61	49	10019	0.035707855	0.048927665	3.351957176	ENSRNOT00000077086
GO:0010596	negative regulation of endothelial cell migration	biological_process	1	61	50	10019	0.037052584	0.050465619	3.284918033	ENSRNOT00000077086
GO:0065003	protein-containing complex assembly	biological_process	1	61	50	10019	0.037052584	0.050465619	3.284918033	TCONS_00005424
GO:1902476	chloride transmembrane transport	biological_process	1	61	50	10019	0.037052584	0.050465619	3.284918033	TCONS_00038021
GO:0021510	spinal cord development	biological_process	1	61	52	10019	0.039799731	0.053991269	3.158575032	XR_357874.3
GO:0030672	synaptic vesicle membrane	cellular_component	1	61	52	10019	0.039799731	0.053991269	3.158575032	TCONS_00005424
GO:0014704	intercalated disc	cellular_component	1	61	53	10019	0.0412016	0.055781888	3.098979276	XR_001836837.1
GO:0031625	ubiquitin protein ligase binding	molecular_function	3	61	216	10019	0.042231523	0.057062832	2.281193078	XR_593571.2; XR_593572.2; ENSRNOT00000092811
GO:0003281	ventricular septum development	biological_process	1	61	54	10019	0.042621968	0.057249626	3.041590771	XR_592751.2
GO:0048706	embryonic skeletal system development	biological_process	1	61	54	10019	0.042621968	0.057249626	3.041590771	XR_001840384.1
GO:0006486	protein glycosylation	biological_process	1	61	54	10019	0.042621968	0.057249626	3.041590771	TCONS_00037056
GO:0090090	negative regulation of canonical Wnt signaling pathway	biological_process	3	61	217	10019	0.042834363	0.057421656	2.270680668	XR_001835535.1; XR_001839513.1; XR_001839610.1
GO:0035725	sodium ion transmembrane transport	biological_process	1	61	55	10019	0.044060568	0.058718683	2.986289121	XR_590452.1
GO:0045732	positive regulation of protein catabolic process	biological_process	1	61	55	10019	0.044060568	0.058718683	2.986289121	XR_001839513.1
GO:0002244	hematopoietic progenitor cell differentiation	biological_process	1	61	55	10019	0.044060568	0.058718683	2.986289121	TCONS_00028273
GO:0030674	protein binding, bridging	molecular_function	1	61	56	10019	0.045517132	0.060160901	2.932962529	XR_001839513.1
GO:0001503	ossification	biological_process	1	61	56	10019	0.045517132	0.060160901	2.932962529	XR_001840384.1
GO:0003707	steroid hormone receptor activity	molecular_function	1	61	56	10019	0.045517132	0.060160901	2.932962529	ENSRNOT00000077086
GO:0005777	peroxisome	cellular_component	1	61	56	10019	0.045517132	0.060160901	2.932962529	TCONS_00016893
GO:0005515	protein binding	molecular_function	12	61	1296	10019	0.045584471	0.060160901	1.520795386	XR_590452.1; XR_001836837.1; XR_591499.1; XR_001838081.1; XR_593571.2; XR_593572.2; XR_001840384.1; ENSRNOT00000077086; ENSRNOT00000092811; ENSRNOT00000025795; TCONS_00005424; TCONS_00037056
GO:0001937	negative regulation of endothelial cell proliferation	biological_process	1	61	57	10019	0.046991397	0.061778266	2.881507046	ENSRNOT00000077086
GO:0006887	exocytosis	biological_process	1	61	57	10019	0.046991397	0.061778266	2.881507046	TCONS_00005424
GO:0010951	negative regulation of endopeptidase activity	biological_process	1	61	58	10019	0.048483101	0.063372345	2.83182589	XR_001841893.1
GO:0048306	calcium-dependent protein binding	molecular_function	1	61	58	10019	0.048483101	0.063372345	2.83182589	TCONS_00005424
GO:0033574	response to testosterone	biological_process	1	61	58	10019	0.048483101	0.063372345	2.83182589	TCONS_00030516
GO:0055007	cardiac muscle cell differentiation	biological_process	1	61	60	10019	0.051517791	0.067081483	2.737431694	ENSRNOT00000025795
GO:0050885	neuromuscular process controlling balance	biological_process	1	61	60	10019	0.051517791	0.067081483	2.737431694	TCONS_00038021
GO:0008150	biological_process	biological_process	10	61	1058	10019	0.05252996	0.068268898	1.55241873	NR_036653.1; XR_001838375.1; XR_001841743.1; XR_362560.3; TCONS_00004008; TCONS_00008895; TCONS_00016745; TCONS_00020266; TCONS_00035038; TCONS_00035040
GO:0045727	positive regulation of translation	biological_process	1	61	62	10019	0.054619157	0.070714156	2.649127446	XR_001839610.1
GO:0043401	steroid hormone mediated signaling pathway	biological_process	1	61	62	10019	0.054619157	0.070714156	2.649127446	ENSRNOT00000077086
GO:0006813	potassium ion transport	biological_process	1	61	63	10019	0.056194216	0.072477767	2.607077804	XR_001836837.1
GO:0030315	T-tubule	cellular_component	1	61	63	10019	0.056194216	0.072477767	2.607077804	XR_001836837.1
GO:0016324	apical plasma membrane	cellular_component	3	61	238	10019	0.056623103	0.072892879	2.070326491	XR_590452.1; XR_001836837.1; TCONS_00008895
GO:0051087	chaperone binding	molecular_function	1	61	64	10019	0.057785194	0.073969393	2.566342213	XR_001836837.1
GO:0042542	response to hydrogen peroxide	biological_process	1	61	64	10019	0.057785194	0.073969393	2.566342213	XR_001840384.1
GO:0009416	response to light stimulus	biological_process	1	61	64	10019	0.057785194	0.073969393	2.566342213	ENSRNOT00000025795
GO:0071230	cellular response to amino acid stimulus	biological_process	1	61	65	10019	0.059391847	0.075883392	2.526860025	XR_001840384.1
GO:0048471	perinuclear region of cytoplasm	cellular_component	5	61	467	10019	0.063716786	0.0812568	1.758521431	XR_593571.2; XR_593572.2; ENSRNOT00000092811; ENSRNOT00000025795; TCONS_00005424
GO:0007169	transmembrane receptor protein tyrosine kinase signaling pathway	biological_process	1	61	68	10019	0.06430344	0.08169896	2.415380906	ENSRNOT00000077381
GO:0000149	SNARE binding	molecular_function	1	61	68	10019	0.06430344	0.08169896	2.415380906	TCONS_00005424
GO:0007155	cell adhesion	biological_process	3	61	249	10019	0.064699729	0.082049377	1.978866285	XR_001838081.1; TCONS_00035038; TCONS_00035040
GO:0030198	extracellular matrix organization	biological_process	1	61	69	10019	0.065970388	0.083505268	2.380375386	TCONS_00016745
GO:0003700	DNA binding transcription factor activity	molecular_function	7	61	716	10019	0.067430972	0.085158761	1.605756022	XR_593571.2; XR_593572.2; ENSRNOT00000077086; ENSRNOT00000092811; TCONS_00016745; TCONS_00035038; TCONS_00035040
GO:0007030	Golgi organization	biological_process	1	61	70	10019	0.067651821	0.085158761	2.346370023	ENSRNOT00000025795
GO:0030512	negative regulation of transforming growth factor beta receptor signaling pathway	biological_process	1	61	70	10019	0.067651821	0.085158761	2.346370023	TCONS_00033624
GO:0030424	axon	cellular_component	4	61	365	10019	0.070682725	0.088809844	1.799955086	XR_001838081.1; XR_593571.2; XR_593572.2; ENSRNOT00000092811
GO:0051607	defense response to virus	biological_process	1	61	72	10019	0.071057215	0.088952138	2.281193078	TCONS_00003218
GO:0019905	syntaxin binding	molecular_function	1	61	72	10019	0.071057215	0.088952138	2.281193078	TCONS_00005424
GO:0000976	transcription regulatory region sequence-specific DNA binding	molecular_function	1	61	73	10019	0.07278072	0.090775953	2.249943858	TCONS_00007918
GO:0030326	embryonic limb morphogenesis	biological_process	1	61	73	10019	0.07278072	0.090775953	2.249943858	TCONS_00033624
GO:0070062	extracellular exosome	cellular_component	1	61	74	10019	0.074517797	0.092772614	2.219539211	XR_590452.1
GO:0045892	negative regulation of transcription, DNA-templated	biological_process	5	61	490	10019	0.076570233	0.095153884	1.675978588	XR_362560.3; ENSRNOT00000077086; TCONS_00005944; TCONS_00014328; TCONS_00016745
GO:0007519	skeletal muscle tissue development	biological_process	1	61	77	10019	0.079808242	0.098997109	2.133063658	ENSRNOT00000077086
GO:0004252	serine-type endopeptidase activity	molecular_function	1	61	79	10019	0.083399037	0.103263171	2.079062046	XR_590319.2
GO:0010628	positive regulation of gene expression	biological_process	4	61	384	10019	0.08370717	0.103456593	1.710894809	XR_593571.2; XR_593572.2; XR_001839610.1; ENSRNOT00000092811
GO:0005576	extracellular region	cellular_component	3	61	273	10019	0.084307043	0.104009233	1.804900018	XR_001840384.1; XR_001841893.1; TCONS_00032521
GO:0005911	cell-cell junction	cellular_component	2	61	170	10019	0.084706551	0.104313131	1.932304725	TCONS_00035038; TCONS_00035040
GO:0030496	midbody	cellular_component	1	61	80	10019	0.085212941	0.104747315	2.05307377	ENSRNOT00000025795
GO:0005543	phospholipid binding	molecular_function	1	61	81	10019	0.087038902	0.106799085	2.027727181	TCONS_00005424
GO:0000981	RNA polymerase II transcription factor activity, sequence-specific DNA binding	molecular_function	3	61	277	10019	0.087832447	0.10757895	1.77883648	XR_593571.2; XR_593572.2; ENSRNOT00000092811
GO:0001649	osteoblast differentiation	biological_process	1	61	82	10019	0.088876711	0.108273775	2.0029988	XR_001840384.1
GO:0005198	structural molecule activity	molecular_function	1	61	82	10019	0.088876711	0.108273775	2.0029988	ENSRNOT00000025795
GO:0009791	post-embryonic development	biological_process	1	61	82	10019	0.088876711	0.108273775	2.0029988	TCONS_00033624
GO:0001568	blood vessel development	biological_process	1	61	83	10019	0.090726163	0.110132829	1.978866285	XR_001840384.1
GO:0005815	microtubule organizing center	cellular_component	1	61	83	10019	0.090726163	0.110132829	1.978866285	TCONS_00038021
GO:0008134	transcription factor binding	molecular_function	4	61	394	10019	0.091046695	0.110325265	1.667471083	XR_593571.2; XR_593572.2; ENSRNOT00000092811; TCONS_00016745
GO:0003777	microtubule motor activity	molecular_function	1	61	85	10019	0.09445918	0.114257018	1.932304725	XR_591499.1
GO:0009749	response to glucose	biological_process	1	61	86	10019	0.096342342	0.116328253	1.909836066	TCONS_00005424
GO:0016477	cell migration	biological_process	2	61	181	10019	0.097759908	0.117830969	1.814871841	XR_001838081.1; TCONS_00034937
GO:0016323	basolateral plasma membrane	cellular_component	2	61	182	10019	0.098985558	0.119097464	1.804900018	XR_001836837.1; TCONS_00030516
GO:0034765	regulation of ion transmembrane transport	biological_process	1	61	88	10019	0.100140983	0.120275149	1.8664307	TCONS_00038021
GO:0031667	response to nutrient levels	biological_process	1	61	89	10019	0.102056071	0.122144437	1.845459569	XR_001840384.1
GO:0005802	trans-Golgi network	cellular_component	1	61	89	10019	0.102056071	0.122144437	1.845459569	TCONS_00005424
GO:0001501	skeletal system development	biological_process	1	61	90	10019	0.103981414	0.12401286	1.824954463	XR_001840384.1
GO:0043434	response to peptide hormone	biological_process	1	61	90	10019	0.103981414	0.12401286	1.824954463	XR_001840384.1
GO:0051216	cartilage development	biological_process	1	61	91	10019	0.10591682	0.12610027	1.804900018	TCONS_00033624
GO:0001666	response to hypoxia	biological_process	2	61	192	10019	0.111581971	0.132613127	1.710894809	XR_590452.1; TCONS_00030516
GO:0007601	visual perception	biological_process	1	61	94	10019	0.111781544	0.13261887	1.747296826	XR_001840384.1
GO:0008270	zinc ion binding	molecular_function	4	61	422	10019	0.113320923	0.134211388	1.556833191	ENSRNOT00000077086; TCONS_00010992; TCONS_00010993; TCONS_00030516
GO:0008076	voltage-gated potassium channel complex	cellular_component	1	61	95	10019	0.113755336	0.134491986	1.728904228	TCONS_00005424
GO:0031982	vesicle	cellular_component	1	61	96	10019	0.115738267	0.136599237	1.710894809	TCONS_00005424
GO:0030334	regulation of cell migration	biological_process	1	61	97	10019	0.117730156	0.138709752	1.693256718	XR_001838081.1
GO:0007018	microtubule-based movement	biological_process	1	61	98	10019	0.119730827	0.140823304	1.675978588	XR_591499.1
GO:0042802	identical protein binding	molecular_function	6	61	694	10019	0.127325677	0.149497907	1.419993386	XR_001838081.1; XR_001840384.1; ENSRNOT00000025795; TCONS_00005424; TCONS_00005944; TCONS_00014328
GO:0009952	anterior/posterior pattern specification	biological_process	1	61	102	10019	0.127817823	0.149817448	1.610253938	ENSRNOT00000077086
GO:0008284	positive regulation of cell proliferation	biological_process	4	61	445	10019	0.133431045	0.155962657	1.476367655	XR_593571.2; XR_593572.2; ENSRNOT00000092811; TCONS_00004008
GO:0006366	transcription by RNA polymerase II	biological_process	5	61	572	10019	0.133518691	0.155962657	1.435715923	XR_593571.2; XR_593572.2; ENSRNOT00000092811; TCONS_00035038; TCONS_00035040
GO:0008201	heparin binding	molecular_function	1	61	107	10019	0.138103523	0.160766665	1.535008427	XR_590319.2
GO:0060021	roof of mouth development	biological_process	1	61	107	10019	0.138103523	0.160766665	1.535008427	TCONS_00016745
GO:0071560	cellular response to transforming growth factor beta stimulus	biological_process	1	61	108	10019	0.140182603	0.162354342	1.520795386	XR_001840384.1
GO:0051015	actin filament binding	molecular_function	1	61	108	10019	0.140182603	0.162354342	1.520795386	ENSRNOT00000025795
GO:0000287	magnesium ion binding	molecular_function	1	61	108	10019	0.140182603	0.162354342	1.520795386	TCONS_00016893
GO:0005901	caveola	cellular_component	1	61	110	10019	0.144361421	0.166345394	1.49314456	XR_001836837.1
GO:0012505	endomembrane system	cellular_component	1	61	110	10019	0.144361421	0.166345394	1.49314456	XR_001838805.1
GO:0030336	negative regulation of cell migration	biological_process	1	61	110	10019	0.144361421	0.166345394	1.49314456	TCONS_00034937
GO:0043195	terminal bouton	cellular_component	1	61	112	10019	0.14856674	0.170613744	1.466481265	TCONS_00005424
GO:0015629	actin cytoskeleton	cellular_component	1	61	112	10019	0.14856674	0.170613744	1.466481265	TCONS_00038021
GO:0043209	myelin sheath	cellular_component	1	61	114	10019	0.152797331	0.175176738	1.440753523	XR_001836837.1
GO:0005634	nucleus	cellular_component	23	61	3251	10019	0.154656962	0.177010742	1.161998074	XR_001835535.1; XR_592751.2; XR_355004.2; XR_593571.2; XR_593572.2; XR_595348.1; XR_595992.2; XR_001841893.1; XR_597441.1; XR_362560.3; ENSRNOT00000089581; ENSRNOT00000079914; ENSRNOT00000077086; ENSRNOT00000092811; ENSRNOT00000089565; TCONS_00004008; TCONS_00005944; TCONS_00014328; TCONS_00016745; TCONS_00028273; TCONS_00035038; TCONS_00035040; TCONS_00038021
GO:0005794	Golgi apparatus	cellular_component	5	61	600	10019	0.156695569	0.179043091	1.368715847	XR_001836837.1; XR_001840384.1; ENSRNOT00000025795; TCONS_00032521; TCONS_00038021
GO:0003682	chromatin binding	molecular_function	3	61	345	10019	0.157884463	0.180099363	1.428225232	TCONS_00007918; TCONS_00035038; TCONS_00035040
GO:0071356	cellular response to tumor necrosis factor	biological_process	1	61	117	10019	0.159187976	0.180979986	1.403811125	XR_001840384.1
GO:0030900	forebrain development	biological_process	1	61	117	10019	0.159187976	0.180979986	1.403811125	ENSRNOT00000077086
GO:0044325	ion channel binding	molecular_function	1	61	118	10019	0.161329539	0.183109027	1.391914421	TCONS_00005424
GO:0007584	response to nutrient	biological_process	1	61	119	10019	0.163476535	0.184882125	1.380217661	XR_001840384.1
GO:0008021	synaptic vesicle	cellular_component	1	61	119	10019	0.163476535	0.184882125	1.380217661	TCONS_00005424
GO:0001077	transcriptional activator activity, RNA polymerase II proximal promoter sequence-specific DNA binding	molecular_function	3	61	350	10019	0.163706199	0.184882125	1.407822014	XR_593571.2; XR_593572.2; ENSRNOT00000092811
GO:0043235	receptor complex	cellular_component	1	61	121	10019	0.167786261	0.189176231	1.357404146	XR_357874.3
GO:0016021	integral component of membrane	cellular_component	16	61	2203	10019	0.168365438	0.189515477	1.192888981	XR_590452.1; XR_001836837.1; XR_352598.3; XR_001838081.1; XR_592789.2; XR_001838805.1; XR_357874.3; XR_595558.2; ENSRNOT00000077381; ENSRNOT00000089756; ENSRNOT00000076363; ENSRNOT00000025795; TCONS_00008895; TCONS_00030516; TCONS_00033624; TCONS_00037056
GO:0005516	calmodulin binding	molecular_function	1	61	122	10019	0.16994871	0.190981966	1.346277882	TCONS_00005424
GO:0009986	cell surface	cellular_component	4	61	488	10019	0.174999707	0.196334103	1.346277882	XR_590319.2; XR_590452.1; XR_001838081.1; XR_595558.2
GO:0006351	transcription, DNA-templated	biological_process	4	61	489	10019	0.176022613	0.197156907	1.343524758	XR_593571.2; XR_593572.2; ENSRNOT00000077086; ENSRNOT00000092811
GO:0043066	negative regulation of apoptotic process	biological_process	4	61	491	10019	0.178075542	0.199128808	1.338052152	XR_593571.2; XR_593572.2; ENSRNOT00000092811; TCONS_00033624
GO:0000122	negative regulation of transcription by RNA polymerase II	biological_process	6	61	767	10019	0.183370472	0.204713592	1.284844081	XR_355004.2; XR_593571.2; XR_593572.2; ENSRNOT00000077086; ENSRNOT00000092811; TCONS_00014328
GO:0009612	response to mechanical stimulus	biological_process	1	61	131	10019	0.189614016	0.211337389	1.253785509	XR_001840384.1
GO:0032991	protein-containing complex	cellular_component	4	61	503	10019	0.190587078	0.212074836	1.306130431	XR_001838081.1; XR_593571.2; XR_593572.2; ENSRNOT00000092811
GO:0042060	wound healing	biological_process	1	61	132	10019	0.191819239	0.213097719	1.244287134	XR_001840384.1
GO:0016887	ATPase activity	molecular_function	1	61	136	10019	0.20067465	0.222572373	1.207690453	XR_591499.1
GO:0042383	sarcolemma	cellular_component	1	61	137	10019	0.20289653	0.224670792	1.198875194	XR_001836837.1
GO:0003677	DNA binding	molecular_function	6	61	796	10019	0.208210215	0.230180449	1.238034434	XR_593571.2; XR_593572.2; ENSRNOT00000077086; ENSRNOT00000092811; TCONS_00004008; TCONS_00016745
GO:0007166	cell surface receptor signaling pathway	biological_process	1	61	141	10019	0.211812637	0.233666526	1.164864551	XR_592789.2
GO:0000139	Golgi membrane	cellular_component	2	61	261	10019	0.212049799	0.233666526	1.258589285	TCONS_00033624; TCONS_00037056
GO:0043005	neuron projection	cellular_component	3	61	392	10019	0.215465338	0.23704668	1.256983941	XR_591499.1; XR_001838081.1; TCONS_00005424
GO:0031965	nuclear membrane	cellular_component	1	61	143	10019	0.216286248	0.23718347	1.148572739	ENSRNOT00000025795
GO:0008022	protein C-terminus binding	molecular_function	1	61	143	10019	0.216286248	0.23718347	1.148572739	TCONS_00005424
GO:0061630	ubiquitin protein ligase activity	molecular_function	1	61	144	10019	0.218526553	0.239254956	1.140596539	TCONS_00028273
GO:0007411	axon guidance	biological_process	1	61	152	10019	0.236518875	0.258538288	1.080565142	XR_591499.1
GO:0005737	cytoplasm	cellular_component	21	61	3123	10019	0.242611518	0.264773147	1.1044393	XR_001835535.1; XR_591499.1; XR_593571.2; XR_593572.2; XR_001839610.1; XR_001840384.1; XR_357874.3; XR_595992.2; XR_001841893.1; ENSRNOT00000082248; ENSRNOT00000092811; ENSRNOT00000089565; ENSRNOT00000025795; TCONS_00003218; TCONS_00004008; TCONS_00014328; TCONS_00016893; TCONS_00020266; TCONS_00028273; TCONS_00034937; TCONS_00038021
GO:0043197	dendritic spine	cellular_component	1	61	157	10019	0.247811652	0.270015576	1.04615224	ENSRNOT00000025795
GO:0005578	proteinaceous extracellular matrix	cellular_component	1	61	158	10019	0.250073227	0.272044517	1.039531023	XR_001840384.1
GO:0003779	actin binding	molecular_function	1	61	160	10019	0.254598647	0.276525803	1.026536885	ENSRNOT00000025795
GO:0010633	negative regulation of epithelial cell migration	biological_process	1	61	162	10019	0.259126488	0.280995443	1.01386359	XR_001835535.1
GO:0005739	mitochondrion	cellular_component	4	61	566	10019	0.260931721	0.282503182	1.160748421	XR_593571.2; XR_593572.2; XR_595992.2; ENSRNOT00000092811
GO:0051260	protein homooligomerization	biological_process	1	61	164	10019	0.263656036	0.284547957	1.0014994	XR_595992.2
GO:0001764	neuron migration	biological_process	1	61	164	10019	0.263656036	0.284547957	1.0014994	ENSRNOT00000077086
GO:0045184	establishment of protein localization	biological_process	1	61	171	10019	0.279512985	0.301184086	0.960502349	XR_001835535.1
GO:0006357	regulation of transcription by RNA polymerase II	biological_process	3	61	441	10019	0.280736592	0.302024675	1.117319059	ENSRNOT00000077086; TCONS_00035038; TCONS_00035040
GO:0019899	enzyme binding	molecular_function	2	61	313	10019	0.297275711	0.319173792	1.049494579	ENSRNOT00000025795; TCONS_00005944
GO:0009897	external side of plasma membrane	cellular_component	1	61	179	10019	0.297614328	0.319173792	0.917574869	XR_590452.1
GO:0000978	RNA polymerase II proximal promoter sequence-specific DNA binding	molecular_function	3	61	454	10019	0.298630771	0.319760307	1.085325341	XR_593571.2; XR_593572.2; ENSRNOT00000092811
GO:0004930	G-protein coupled receptor activity	molecular_function	1	61	181	10019	0.302131837	0.323001226	0.907435921	XR_592789.2
GO:0005874	microtubule	cellular_component	1	61	182	10019	0.304389018	0.324904265	0.902450009	XR_591499.1
GO:0042127	regulation of cell proliferation	biological_process	1	61	183	10019	0.306645057	0.326800131	0.897518588	TCONS_00033624
GO:0045944	positive regulation of transcription by RNA polymerase II	biological_process	7	61	1054	10019	0.30985784	0.329708108	1.090817184	XR_355004.2; XR_593571.2; XR_593572.2; ENSRNOT00000092811; TCONS_00016745; TCONS_00035038; TCONS_00035040
GO:0008017	microtubule binding	molecular_function	1	61	186	10019	0.313405635	0.332444295	0.883042482	XR_591499.1
GO:0045211	postsynaptic membrane	cellular_component	1	61	186	10019	0.313405635	0.332444295	0.883042482	ENSRNOT00000025795
GO:0030335	positive regulation of cell migration	biological_process	1	61	191	10019	0.324644158	0.343829971	0.859926187	XR_001840384.1
GO:0050680	negative regulation of epithelial cell proliferation	biological_process	1	61	197	10019	0.338072612	0.357496038	0.833735541	XR_001835535.1
GO:0001525	angiogenesis	biological_process	1	61	201	10019	0.346983927	0.366350472	0.817143789	XR_357874.3
GO:0031410	cytoplasmic vesicle	cellular_component	1	61	202	10019	0.349206113	0.368125949	0.813098523	TCONS_00005424
GO:0005768	endosome	cellular_component	1	61	206	10019	0.358070668	0.376887364	0.797310202	XR_001836837.1
GO:0005615	extracellular space	cellular_component	4	61	647	10019	0.358735134	0.377004053	1.015430613	XR_590319.2; XR_001840384.1; XR_001841893.1; TCONS_00008895
GO:0005096	GTPase activator activity	molecular_function	1	61	207	10019	0.360280498	0.378044714	0.793458462	TCONS_00034937
GO:0042803	protein homodimerization activity	molecular_function	4	61	657	10019	0.371067331	0.388764388	0.999975048	ENSRNOT00000077086; ENSRNOT00000025795; TCONS_00005944; TCONS_00008895
GO:0016607	nuclear speck	cellular_component	1	61	214	10019	0.375673078	0.392985201	0.767504213	ENSRNOT00000077198
GO:0004842	ubiquitin-protein transferase activity	molecular_function	1	61	216	10019	0.380045029	0.396948872	0.760397693	TCONS_00028273
GO:0003676	nucleic acid binding	molecular_function	1	61	226	10019	0.401715091	0.41894024	0.726751777	ENSRNOT00000079914
GO:0030054	cell junction	cellular_component	2	61	377	10019	0.404425485	0.42112195	0.871331043	ENSRNOT00000089581; TCONS_00005424
GO:0046982	protein heterodimerization activity	molecular_function	3	61	533	10019	0.40910178	0.425340934	0.924460985	XR_593571.2; XR_593572.2; ENSRNOT00000092811
GO:0019904	protein domain specific binding	molecular_function	1	61	233	10019	0.416680843	0.432560448	0.704918033	XR_001836837.1
GO:0016567	protein ubiquitination	biological_process	1	61	237	10019	0.425151844	0.440682505	0.693020682	TCONS_00028273
GO:0005667	transcription factor complex	cellular_component	1	61	238	10019	0.427260068	0.44219469	0.69010883	TCONS_00016745
GO:0005783	endoplasmic reticulum	cellular_component	3	61	565	10019	0.453382735	0.467969809	0.872102133	XR_001836837.1; XR_001840384.1; TCONS_00032521
GO:0005575	cellular_component	cellular_component	7	61	1204	10019	0.453539022	0.467969809	0.954918033	NR_036653.1; XR_001838375.1; XR_362560.3; TCONS_00016745; TCONS_00020266; TCONS_00035038; TCONS_00035040
GO:0006355	regulation of transcription, DNA-templated	biological_process	4	61	725	10019	0.454677618	0.468434883	0.906184285	XR_593571.2; XR_593572.2; ENSRNOT00000077086; ENSRNOT00000092811
GO:0014069	postsynaptic density	cellular_component	1	61	253	10019	0.458401788	0.471313309	0.649193287	XR_001836837.1
GO:0005509	calcium ion binding	molecular_function	3	61	569	10019	0.458855689	0.471313309	0.865971362	XR_001835535.1; XR_001839513.1; TCONS_00032521
GO:0000977	RNA polymerase II regulatory region sequence-specific DNA binding	molecular_function	1	61	256	10019	0.464517048	0.475110919	0.641585553	TCONS_00016745
GO:0043547	positive regulation of GTPase activity	biological_process	1	61	256	10019	0.464517048	0.475110919	0.641585553	TCONS_00034937
GO:0030425	dendrite	cellular_component	2	61	414	10019	0.464645921	0.475110919	0.793458462	XR_591499.1; XR_357874.3
GO:0045121	membrane raft	cellular_component	1	61	262	10019	0.476629147	0.486633357	0.626892754	XR_001836837.1
GO:0045202	synapse	cellular_component	1	61	280	10019	0.511978734	0.521942392	0.586592506	TCONS_00005424
GO:0016020	membrane	cellular_component	4	61	816	10019	0.561693835	0.571769061	0.805126969	XR_590452.1; XR_001836837.1; XR_001838081.1; TCONS_00005424
GO:0007186	G-protein coupled receptor signaling pathway	biological_process	1	61	314	10019	0.574461307	0.583892761	0.52307612	XR_592789.2
GO:0005789	endoplasmic reticulum membrane	cellular_component	1	61	322	10019	0.588316343	0.597084098	0.51008044	XR_595992.2
GO:0005102	signaling receptor binding	molecular_function	1	61	323	10019	0.590025205	0.597927328	0.508501243	ENSRNOT00000025795
GO:0043231	intracellular membrane-bounded organelle	cellular_component	2	61	504	10019	0.598737413	0.605854648	0.651769451	ENSRNOT00000089581; TCONS_00005424
GO:0005829	cytosol	cellular_component	11	61	2081	10019	0.634218325	0.640805162	0.868190734	XR_001835535.1; XR_595348.1; XR_595992.2; XR_001841743.1; XR_362560.3; ENSRNOT00000082248; ENSRNOT00000077086; TCONS_00003218; TCONS_00008895; TCONS_00014328; TCONS_00028273
GO:0019901	protein kinase binding	molecular_function	1	61	405	10019	0.712857022	0.718129633	0.405545436	XR_001836837.1
GO:0043025	neuronal cell body	cellular_component	1	61	405	10019	0.712857022	0.718129633	0.405545436	XR_357874.3
GO:0046872	metal ion binding	molecular_function	2	61	720	10019	0.824295677	0.829165961	0.456238616	XR_355004.2; XR_001840384.1
GO:0005622	intracellular	cellular_component	1	61	532	10019	0.842336209	0.84606336	0.308732898	XR_001841893.1
GO:0005524	ATP binding	molecular_function	2	61	846	10019	0.898590581	0.901237387	0.388288184	XR_001836837.1; XR_591499.1
GO:0005887	integral component of plasma membrane	cellular_component	1	61	687	10019	0.928513223	0.929878684	0.239077004	XR_590452.1
GO:0005886	plasma membrane	cellular_component	8	61	2227	10019	0.946847385	0.946847385	0.59001671	XR_001835535.1; XR_001836837.1; XR_352598.3; XR_357874.3; XR_595558.2; XR_362560.3; TCONS_00005424; TCONS_00030516
