# Supplementary material for: Comprehensive Analysis of the Profiles of Differentially Expressed mRNAs, lncRNAs, and circRNAs in Phosgene-Induced Acute Lung Injury
Source: Biomed Res Int. 2021 Jan 9;2021:6278526. doi: 10.1155/2021/6278526 (PMC7811572; doi:10.1155/2021/6278526)
Supplement: Supplementary 15 — Table S15: GO with differentially expressed circRNAs between the B and C group. [file 6278526.f15.txt]

Table S15 GO with differentially expressed circRNAs between B and C group
id	Term	Category	ListHits	ListTotal	PopHits	PopTotal	pValue	qValue	Enrichment_score	Gene
GO:0019626	short-chain fatty acid catabolic process	biological_process	1	16	1	6636	0	0	414.75	circRNA_3112|Chr19:15151107_15207439_+
GO:0030339	fatty-acyl-ethyl-ester synthase activity	molecular_function	1	16	1	6636	0	0	414.75	circRNA_3112|Chr19:15151107_15207439_+
GO:0046464	acylglycerol catabolic process	biological_process	1	16	1	6636	0	0	414.75	circRNA_3112|Chr19:15151107_15207439_+
GO:0007586	digestion	biological_process	1	16	1	6636	0	0	414.75	circRNA_3235|Chr19:43899905_43908769_-
GO:0004345	glucose-6-phosphate dehydrogenase activity	molecular_function	1	16	1	6636	0	0	414.75	circRNA_5485|Chr5:167014847_167016955_-
GO:0017057	6-phosphogluconolactonase activity	molecular_function	1	16	1	6636	0	0	414.75	circRNA_5485|Chr5:167014847_167016955_-
GO:0097305	response to alcohol	biological_process	1	16	1	6636	0	0	414.75	circRNA_5485|Chr5:167014847_167016955_-
GO:0002376	immune system process	biological_process	2	16	10	6636	1.37E-06	3.74E-05	82.95	circRNA_4915|Chr4:157436084_157436320_-; circRNA_4917|Chr4:157436084_157436371_-
GO:0006695	cholesterol biosynthetic process	biological_process	1	16	2	6636	5.45E-06	0.000132637	207.375	circRNA_3112|Chr19:15151107_15207439_+
GO:0004857	enzyme inhibitor activity	molecular_function	2	16	18	6636	9.18E-06	0.000201079	46.08333333	circRNA_4915|Chr4:157436084_157436320_-; circRNA_4917|Chr4:157436084_157436371_-
GO:0033179	proton-transporting V-type ATPase, V0 domain	cellular_component	1	16	3	6636	1.63E-05	0.000255441	138.25	circRNA_0858|Chr10:16769713_16774652_-
GO:0004771	sterol esterase activity	molecular_function	1	16	3	6636	1.63E-05	0.000255441	138.25	circRNA_3112|Chr19:15151107_15207439_+
GO:0051791	medium-chain fatty acid metabolic process	biological_process	1	16	3	6636	1.63E-05	0.000255441	138.25	circRNA_3112|Chr19:15151107_15207439_+
GO:0006739	NADP metabolic process	biological_process	1	16	3	6636	1.63E-05	0.000255441	138.25	circRNA_5485|Chr5:167014847_167016955_-
GO:0008078	mesodermal cell migration	biological_process	1	16	4	6636	3.26E-05	0.000396793	103.6875	circRNA_4253|Chr3:67723614_67757148_-
GO:0045175	basal protein localization	biological_process	1	16	4	6636	3.26E-05	0.000396793	103.6875	circRNA_4253|Chr3:67723614_67757148_-
GO:0050794	regulation of cellular process	biological_process	1	16	4	6636	3.26E-05	0.000396793	103.6875	circRNA_4895|Chr4:152465373_152468818_-
GO:0006098	pentose-phosphate shunt	biological_process	1	16	4	6636	3.26E-05	0.000396793	103.6875	circRNA_5485|Chr5:167014847_167016955_-
GO:0007354	zygotic determination of anterior/posterior axis, embryo	biological_process	1	16	5	6636	5.43E-05	0.000594352	82.95	circRNA_4253|Chr3:67723614_67757148_-
GO:0019869	chloride channel inhibitor activity	molecular_function	1	16	5	6636	5.43E-05	0.000594352	82.95	circRNA_4895|Chr4:152465373_152468818_-
GO:0043086	negative regulation of catalytic activity	biological_process	2	16	33	6636	6.01E-05	0.000626245	25.13636364	circRNA_4915|Chr4:157436084_157436320_-; circRNA_4917|Chr4:157436084_157436371_-
GO:0034379	very-low-density lipoprotein particle assembly	biological_process	1	16	6	6636	8.13E-05	0.000638272	69.125	circRNA_3112|Chr19:15151107_15207439_+
GO:0010172	embryonic body morphogenesis	biological_process	1	16	6	6636	8.13E-05	0.000638272	69.125	circRNA_4253|Chr3:67723614_67757148_-
GO:0045176	apical protein localization	biological_process	1	16	6	6636	8.13E-05	0.000638272	69.125	circRNA_4253|Chr3:67723614_67757148_-
GO:0003084	positive regulation of systemic arterial blood pressure	biological_process	1	16	6	6636	8.13E-05	0.000638272	69.125	circRNA_4895|Chr4:152465373_152468818_-
GO:0033320	UDP-D-xylose biosynthetic process	biological_process	1	16	6	6636	8.13E-05	0.000638272	69.125	circRNA_6844|Chr9:11209034_11219449_-
GO:0048040	UDP-glucuronate decarboxylase activity	molecular_function	1	16	6	6636	8.13E-05	0.000638272	69.125	circRNA_6844|Chr9:11209034_11219449_-
GO:0004806	triglyceride lipase activity	molecular_function	1	16	7	6636	0.000113665	0.000638272	59.25	circRNA_3112|Chr19:15151107_15207439_+
GO:0032094	response to food	biological_process	1	16	7	6636	0.000113665	0.000638272	59.25	circRNA_3235|Chr19:43899905_43908769_-
GO:0010650	positive regulation of cell communication by electrical coupling	biological_process	1	16	7	6636	0.000113665	0.000638272	59.25	circRNA_3949|Chr20:20259263_20276110_+
GO:0034112	positive regulation of homotypic cell-cell adhesion	biological_process	1	16	7	6636	0.000113665	0.000638272	59.25	circRNA_3949|Chr20:20259263_20276110_+
GO:0043266	regulation of potassium ion transport	biological_process	1	16	7	6636	0.000113665	0.000638272	59.25	circRNA_3949|Chr20:20259263_20276110_+
GO:0045838	positive regulation of membrane potential	biological_process	1	16	7	6636	0.000113665	0.000638272	59.25	circRNA_3949|Chr20:20259263_20276110_+
GO:0071286	cellular response to magnesium ion	biological_process	1	16	7	6636	0.000113665	0.000638272	59.25	circRNA_3949|Chr20:20259263_20276110_+
GO:0072660	maintenance of protein location in plasma membrane	biological_process	1	16	7	6636	0.000113665	0.000638272	59.25	circRNA_3949|Chr20:20259263_20276110_+
GO:0099612	protein localization to axon	biological_process	1	16	7	6636	0.000113665	0.000638272	59.25	circRNA_3949|Chr20:20259263_20276110_+
GO:1900827	positive regulation of membrane depolarization during cardiac muscle cell action potential	biological_process	1	16	7	6636	0.000113665	0.000638272	59.25	circRNA_3949|Chr20:20259263_20276110_+
GO:0031209	SCAR complex	cellular_component	1	16	7	6636	0.000113665	0.000638272	59.25	circRNA_4253|Chr3:67723614_67757148_-
GO:0033673	negative regulation of kinase activity	biological_process	1	16	7	6636	0.000113665	0.000638272	59.25	circRNA_4895|Chr4:152465373_152468818_-
GO:0052689	carboxylic ester hydrolase activity	molecular_function	1	16	8	6636	0.00015134	0.00070518	51.84375	circRNA_3112|Chr19:15151107_15207439_+
GO:0010960	magnesium ion homeostasis	biological_process	1	16	8	6636	0.00015134	0.00070518	51.84375	circRNA_3949|Chr20:20259263_20276110_+
GO:0014731	spectrin-associated cytoskeleton	cellular_component	1	16	8	6636	0.00015134	0.00070518	51.84375	circRNA_3949|Chr20:20259263_20276110_+
GO:0033268	node of Ranvier	cellular_component	1	16	8	6636	0.00015134	0.00070518	51.84375	circRNA_3949|Chr20:20259263_20276110_+
GO:2000601	positive regulation of Arp2/3 complex-mediated actin nucleation	biological_process	1	16	8	6636	0.00015134	0.00070518	51.84375	circRNA_4253|Chr3:67723614_67757148_-
GO:0050661	NADP binding	molecular_function	1	16	8	6636	0.00015134	0.00070518	51.84375	circRNA_5485|Chr5:167014847_167016955_-
GO:0071837	HMG box domain binding	molecular_function	1	16	8	6636	0.00015134	0.00070518	51.84375	circRNA_6631|Chr8:78521649_78538216_-
GO:0070403	NAD+ binding	molecular_function	1	16	8	6636	0.00015134	0.00070518	51.84375	circRNA_6844|Chr9:11209034_11219449_-
GO:0048570	notochord morphogenesis	biological_process	1	16	9	6636	0.000194306	0.000818329	46.08333333	circRNA_4253|Chr3:67723614_67757148_-
GO:0023016	signal transduction by trans-phosphorylation	biological_process	1	16	9	6636	0.000194306	0.000818329	46.08333333	circRNA_4895|Chr4:152465373_152468818_-
GO:0030291	protein serine/threonine kinase inhibitor activity	molecular_function	1	16	9	6636	0.000194306	0.000818329	46.08333333	circRNA_4895|Chr4:152465373_152468818_-
GO:0032414	positive regulation of ion transmembrane transporter activity	biological_process	1	16	9	6636	0.000194306	0.000818329	46.08333333	circRNA_4895|Chr4:152465373_152468818_-
GO:0090188	negative regulation of pancreatic juice secretion	biological_process	1	16	9	6636	0.000194306	0.000818329	46.08333333	circRNA_4895|Chr4:152465373_152468818_-
GO:0046961	proton-transporting ATPase activity, rotational mechanism	molecular_function	1	16	10	6636	0.000242541	0.000900281	41.475	circRNA_0858|Chr10:16769713_16774652_-
GO:1902600	proton transmembrane transport	biological_process	1	16	10	6636	0.000242541	0.000900281	41.475	circRNA_0858|Chr10:16769713_16774652_-
GO:0030163	protein catabolic process	biological_process	1	16	10	6636	0.000242541	0.000900281	41.475	circRNA_3235|Chr19:43899905_43908769_-
GO:0019228	neuronal action potential	biological_process	1	16	10	6636	0.000242541	0.000900281	41.475	circRNA_3949|Chr20:20259263_20276110_+
GO:0043194	axon initial segment	cellular_component	1	16	10	6636	0.000242541	0.000900281	41.475	circRNA_3949|Chr20:20259263_20276110_+
GO:1902260	negative regulation of delayed rectifier potassium channel activity	biological_process	1	16	10	6636	0.000242541	0.000900281	41.475	circRNA_3949|Chr20:20259263_20276110_+
GO:0002028	regulation of sodium ion transport	biological_process	1	16	10	6636	0.000242541	0.000900281	41.475	circRNA_4895|Chr4:152465373_152468818_-
GO:0060052	neurofilament cytoskeleton organization	biological_process	1	16	11	6636	0.000296023	0.001012953	37.70454545	circRNA_3346|Chr2:25924932_25927179_-
GO:0035050	embryonic heart tube development	biological_process	1	16	11	6636	0.000296023	0.001012953	37.70454545	circRNA_4253|Chr3:67723614_67757148_-
GO:0048340	paraxial mesoderm morphogenesis	biological_process	1	16	11	6636	0.000296023	0.001012953	37.70454545	circRNA_4253|Chr3:67723614_67757148_-
GO:0010766	negative regulation of sodium ion transport	biological_process	1	16	11	6636	0.000296023	0.001012953	37.70454545	circRNA_4895|Chr4:152465373_152468818_-
GO:0019870	potassium channel inhibitor activity	molecular_function	1	16	11	6636	0.000296023	0.001012953	37.70454545	circRNA_4895|Chr4:152465373_152468818_-
GO:0015991	ATP hydrolysis coupled proton transport	biological_process	1	16	12	6636	0.000354728	0.001142432	34.5625	circRNA_0858|Chr10:16769713_16774652_-
GO:0071709	membrane assembly	biological_process	1	16	12	6636	0.000354728	0.001142432	34.5625	circRNA_3949|Chr20:20259263_20276110_+
GO:0090314	positive regulation of protein targeting to membrane	biological_process	1	16	12	6636	0.000354728	0.001142432	34.5625	circRNA_3949|Chr20:20259263_20276110_+
GO:2000651	positive regulation of sodium ion transmembrane transporter activity	biological_process	1	16	12	6636	0.000354728	0.001142432	34.5625	circRNA_3949|Chr20:20259263_20276110_+
GO:0002474	antigen processing and presentation of peptide antigen via MHC class I	biological_process	1	16	13	6636	0.000418634	0.001273346	31.90384615	circRNA_3868|Chr20:3149832_3170181_+
GO:0042605	peptide antigen binding	molecular_function	1	16	13	6636	0.000418634	0.001273346	31.90384615	circRNA_3868|Chr20:3149832_3170181_+
GO:0030903	notochord development	biological_process	1	16	13	6636	0.000418634	0.001273346	31.90384615	circRNA_4253|Chr3:67723614_67757148_-
GO:0035497	cAMP response element binding	molecular_function	1	16	13	6636	0.000418634	0.001273346	31.90384615	circRNA_6631|Chr8:78521649_78538216_-
GO:0005811	lipid droplet	cellular_component	1	16	14	6636	0.00048772	0.001369368	29.625	circRNA_3112|Chr19:15151107_15207439_+
GO:2001259	positive regulation of cation channel activity	biological_process	1	16	14	6636	0.00048772	0.001369368	29.625	circRNA_3949|Chr20:20259263_20276110_+
GO:0010592	positive regulation of lamellipodium assembly	biological_process	1	16	14	6636	0.00048772	0.001369368	29.625	circRNA_4253|Chr3:67723614_67757148_-
GO:0005975	carbohydrate metabolic process	biological_process	1	16	14	6636	0.00048772	0.001369368	29.625	circRNA_5485|Chr5:167014847_167016955_-
GO:0043425	bHLH transcription factor binding	molecular_function	1	16	14	6636	0.00048772	0.001369368	29.625	circRNA_6631|Chr8:78521649_78538216_-
GO:0070888	E-box binding	molecular_function	1	16	14	6636	0.00048772	0.001369368	29.625	circRNA_6631|Chr8:78521649_78538216_-
GO:0033270	paranode region of axon	cellular_component	1	16	15	6636	0.000561963	0.001482769	27.65	circRNA_3949|Chr20:20259263_20276110_+
GO:0042074	cell migration involved in gastrulation	biological_process	1	16	15	6636	0.000561963	0.001482769	27.65	circRNA_4253|Chr3:67723614_67757148_-
GO:0048617	embryonic foregut morphogenesis	biological_process	1	16	15	6636	0.000561963	0.001482769	27.65	circRNA_4253|Chr3:67723614_67757148_-
GO:0006811	ion transport	biological_process	1	16	15	6636	0.000561963	0.001482769	27.65	circRNA_4895|Chr4:152465373_152468818_-
GO:0030295	protein kinase activator activity	molecular_function	1	16	15	6636	0.000561963	0.001482769	27.65	circRNA_4895|Chr4:152465373_152468818_-
GO:0016601	Rac protein signal transduction	biological_process	1	16	16	6636	0.00064134	0.001672066	25.921875	circRNA_4253|Chr3:67723614_67757148_-
GO:0043200	response to amino acid	biological_process	1	16	17	6636	0.000725831	0.001848337	24.39705882	circRNA_0858|Chr10:16769713_16774652_-
GO:0007009	plasma membrane organization	biological_process	1	16	17	6636	0.000725831	0.001848337	24.39705882	circRNA_3949|Chr20:20259263_20276110_+
GO:0030950	establishment or maintenance of actin cytoskeleton polarity	biological_process	1	16	18	6636	0.000815412	0.002029264	23.04166667	circRNA_4253|Chr3:67723614_67757148_-
GO:0031258	lamellipodium membrane	cellular_component	1	16	18	6636	0.000815412	0.002029264	23.04166667	circRNA_4253|Chr3:67723614_67757148_-
GO:0048339	paraxial mesoderm development	biological_process	1	16	19	6636	0.000910062	0.002239366	21.82894737	circRNA_4253|Chr3:67723614_67757148_-
GO:0006006	glucose metabolic process	biological_process	1	16	20	6636	0.001009759	0.00245708	20.7375	circRNA_5485|Chr5:167014847_167016955_-
GO:0030866	cortical actin cytoskeleton organization	biological_process	1	16	21	6636	0.001114481	0.002624423	19.75	circRNA_4253|Chr3:67723614_67757148_-
GO:0010923	negative regulation of phosphatase activity	biological_process	1	16	21	6636	0.001114481	0.002624423	19.75	circRNA_4895|Chr4:152465373_152468818_-
GO:0071901	negative regulation of protein serine/threonine kinase activity	biological_process	1	16	21	6636	0.001114481	0.002624423	19.75	circRNA_4895|Chr4:152465373_152468818_-
GO:0005764	lysosome	cellular_component	2	16	89	6636	0.00115098	0.002681539	9.320224719	circRNA_3235|Chr19:43899905_43908769_-; circRNA_3949|Chr20:20259263_20276110_+
GO:0004252	serine-type endopeptidase activity	molecular_function	1	16	22	6636	0.001224206	0.002792721	18.85227273	circRNA_3235|Chr19:43899905_43908769_-
GO:0030031	cell projection assembly	biological_process	1	16	22	6636	0.001224206	0.002792721	18.85227273	circRNA_4253|Chr3:67723614_67757148_-
GO:0016787	hydrolase activity	molecular_function	1	16	23	6636	0.001338913	0.002992062	18.0326087	circRNA_3112|Chr19:15151107_15207439_+
GO:0010765	positive regulation of sodium ion transport	biological_process	1	16	23	6636	0.001338913	0.002992062	18.0326087	circRNA_3949|Chr20:20259263_20276110_+
GO:0030855	epithelial cell differentiation	biological_process	1	16	24	6636	0.001458581	0.003226557	17.28125	circRNA_3112|Chr19:15151107_15207439_+
GO:0005788	endoplasmic reticulum lumen	cellular_component	1	16	25	6636	0.001583186	0.003467178	16.59	circRNA_3112|Chr19:15151107_15207439_+
GO:0050808	synapse organization	biological_process	1	16	26	6636	0.001712709	0.003713696	15.95192308	circRNA_3949|Chr20:20259263_20276110_+
GO:0021955	central nervous system neuron axonogenesis	biological_process	1	16	27	6636	0.001847128	0.003965892	15.36111111	circRNA_3346|Chr2:25924932_25927179_-
GO:0009636	response to toxic substance	biological_process	1	16	28	6636	0.00198642	0.004223554	14.8125	circRNA_3235|Chr19:43899905_43908769_-
GO:0051262	protein tetramerization	biological_process	1	16	29	6636	0.002130566	0.00448648	14.30172414	circRNA_6844|Chr9:11209034_11219449_-
GO:0030507	spectrin binding	molecular_function	1	16	30	6636	0.002279543	0.004665607	13.825	circRNA_3949|Chr20:20259263_20276110_+
GO:0043034	costamere	cellular_component	1	16	30	6636	0.002279543	0.004665607	13.825	circRNA_3949|Chr20:20259263_20276110_+
GO:0030838	positive regulation of actin filament polymerization	biological_process	1	16	30	6636	0.002279543	0.004665607	13.825	circRNA_4253|Chr3:67723614_67757148_-
GO:0034097	response to cytokine	biological_process	1	16	31	6636	0.002433331	0.004934254	13.37903226	circRNA_3235|Chr19:43899905_43908769_-
GO:0030032	lamellipodium assembly	biological_process	1	16	33	6636	0.002755254	0.00548546	12.56818182	circRNA_4253|Chr3:67723614_67757148_-
GO:0090575	RNA polymerase II transcription factor complex	cellular_component	1	16	33	6636	0.002755254	0.00548546	12.56818182	circRNA_6631|Chr8:78521649_78538216_-
GO:0043001	Golgi to plasma membrane protein transport	biological_process	1	16	34	6636	0.002923347	0.005767684	12.19852941	circRNA_3949|Chr20:20259263_20276110_+
GO:0007492	endoderm development	biological_process	1	16	35	6636	0.003096166	0.006000535	11.85	circRNA_4253|Chr3:67723614_67757148_-
GO:0071277	cellular response to calcium ion	biological_process	1	16	35	6636	0.003096166	0.006000535	11.85	circRNA_4895|Chr4:152465373_152468818_-
GO:0070373	negative regulation of ERK1 and ERK2 cascade	biological_process	1	16	36	6636	0.003273691	0.006127679	11.52083333	circRNA_2663|Chr17:24052253_24058139_-
GO:0016042	lipid catabolic process	biological_process	1	16	36	6636	0.003273691	0.006127679	11.52083333	circRNA_3112|Chr19:15151107_15207439_+
GO:0009925	basal plasma membrane	cellular_component	1	16	36	6636	0.003273691	0.006127679	11.52083333	circRNA_3949|Chr20:20259263_20276110_+
GO:0016529	sarcoplasmic reticulum	cellular_component	1	16	36	6636	0.003273691	0.006127679	11.52083333	circRNA_3949|Chr20:20259263_20276110_+
GO:0007528	neuromuscular junction development	biological_process	1	16	39	6636	0.003834293	0.007116188	10.63461538	circRNA_3949|Chr20:20259263_20276110_+
GO:0005200	structural constituent of cytoskeleton	molecular_function	1	16	40	6636	0.004030433	0.007417352	10.36875	circRNA_3949|Chr20:20259263_20276110_+
GO:0031941	filamentous actin	cellular_component	1	16	41	6636	0.004231176	0.007721895	10.11585366	circRNA_4253|Chr3:67723614_67757148_-
GO:0016328	lateral plasma membrane	cellular_component	1	16	42	6636	0.0044365	0.007963881	9.875	circRNA_3949|Chr20:20259263_20276110_+
GO:0019902	phosphatase binding	molecular_function	1	16	42	6636	0.0044365	0.007963881	9.875	circRNA_4895|Chr4:152465373_152468818_-
GO:0008233	peptidase activity	molecular_function	1	16	43	6636	0.004646385	0.008206116	9.645348837	circRNA_3235|Chr19:43899905_43908769_-
GO:0000281	mitotic cytokinesis	biological_process	1	16	43	6636	0.004646385	0.008206116	9.645348837	circRNA_3949|Chr20:20259263_20276110_+
GO:0043434	response to peptide hormone	biological_process	1	16	44	6636	0.004860812	0.008448554	9.426136364	circRNA_3235|Chr19:43899905_43908769_-
GO:0032580	Golgi cisterna membrane	cellular_component	1	16	44	6636	0.004860812	0.008448554	9.426136364	circRNA_6844|Chr9:11209034_11219449_-
GO:0048812	neuron projection morphogenesis	biological_process	1	16	45	6636	0.005079759	0.008759585	9.216666667	circRNA_4253|Chr3:67723614_67757148_-
GO:0030315	T-tubule	cellular_component	1	16	46	6636	0.005303207	0.009073456	9.016304348	circRNA_3949|Chr20:20259263_20276110_+
GO:0007584	response to nutrient	biological_process	1	16	47	6636	0.005531135	0.009317835	8.824468085	circRNA_3235|Chr19:43899905_43908769_-
GO:0046332	SMAD binding	molecular_function	1	16	47	6636	0.005531135	0.009317835	8.824468085	circRNA_6631|Chr8:78521649_78538216_-
GO:0001756	somitogenesis	biological_process	1	16	48	6636	0.005763523	0.009635203	8.640625	circRNA_4253|Chr3:67723614_67757148_-
GO:0007411	axon guidance	biological_process	1	16	49	6636	0.006000351	0.009880278	8.464285714	circRNA_3949|Chr20:20259263_20276110_+
GO:0030674	protein binding, bridging	molecular_function	1	16	49	6636	0.006000351	0.009880278	8.464285714	circRNA_3949|Chr20:20259263_20276110_+
GO:0008092	cytoskeletal protein binding	molecular_function	1	16	50	6636	0.006241599	0.010125261	8.295	circRNA_3949|Chr20:20259263_20276110_+
GO:0031594	neuromuscular junction	cellular_component	1	16	50	6636	0.006241599	0.010125261	8.295	circRNA_3949|Chr20:20259263_20276110_+
GO:0014704	intercalated disc	cellular_component	1	16	51	6636	0.006487248	0.01029498	8.132352941	circRNA_3949|Chr20:20259263_20276110_+
GO:0048365	Rac GTPase binding	molecular_function	1	16	51	6636	0.006487248	0.01029498	8.132352941	circRNA_4253|Chr3:67723614_67757148_-
GO:0045666	positive regulation of neuron differentiation	biological_process	1	16	51	6636	0.006487248	0.01029498	8.132352941	circRNA_6631|Chr8:78521649_78538216_-
GO:0032880	regulation of protein localization	biological_process	1	16	52	6636	0.006737277	0.010614846	7.975961538	circRNA_4253|Chr3:67723614_67757148_-
GO:0044325	ion channel binding	molecular_function	1	16	55	6636	0.007513446	0.011669821	7.540909091	circRNA_3949|Chr20:20259263_20276110_+
GO:0090263	positive regulation of canonical Wnt signaling pathway	biological_process	1	16	55	6636	0.007513446	0.011669821	7.540909091	circRNA_4895|Chr4:152465373_152468818_-
GO:0045184	establishment of protein localization	biological_process	1	16	56	6636	0.007780798	0.011999964	7.40625	circRNA_3949|Chr20:20259263_20276110_+
GO:0001726	ruffle	cellular_component	1	16	58	6636	0.008328328	0.012754573	7.150862069	circRNA_4253|Chr3:67723614_67757148_-
GO:0055085	transmembrane transport	biological_process	1	16	60	6636	0.00889283	0.013339244	6.9125	circRNA_0858|Chr10:16769713_16774652_-
GO:0007409	axonogenesis	biological_process	1	16	60	6636	0.00889283	0.013339244	6.9125	circRNA_3949|Chr20:20259263_20276110_+
GO:0000902	cell morphogenesis	biological_process	1	16	60	6636	0.00889283	0.013339244	6.9125	circRNA_4253|Chr3:67723614_67757148_-
GO:0001843	neural tube closure	biological_process	1	16	61	6636	0.009181396	0.013585985	6.799180328	circRNA_4253|Chr3:67723614_67757148_-
GO:0030246	carbohydrate binding	molecular_function	1	16	61	6636	0.009181396	0.013585985	6.799180328	circRNA_5485|Chr5:167014847_167016955_-
GO:0046983	protein dimerization activity	molecular_function	1	16	62	6636	0.009474147	0.013925089	6.689516129	circRNA_6631|Chr8:78521649_78538216_-
GO:0050821	protein stabilization	biological_process	1	16	65	6636	0.010377317	0.015150883	6.380769231	circRNA_4253|Chr3:67723614_67757148_-
GO:0010628	positive regulation of gene expression	biological_process	2	16	200	6636	0.011301462	0.016306079	4.1475	circRNA_3949|Chr20:20259263_20276110_+; circRNA_6631|Chr8:78521649_78538216_-
GO:0005923	bicellular tight junction	cellular_component	1	16	68	6636	0.011317461	0.016306079	6.099264706	circRNA_3949|Chr20:20259263_20276110_+
GO:0032147	activation of protein kinase activity	biological_process	1	16	70	6636	0.011964513	0.017125675	5.925	circRNA_4895|Chr4:152465373_152468818_-
GO:0005515	protein binding	molecular_function	5	16	866	6636	0.012167972	0.017303804	2.394630485	circRNA_2663|Chr17:24052253_24058139_-; circRNA_3235|Chr19:43899905_43908769_-; circRNA_3949|Chr20:20259263_20276110_+; circRNA_4253|Chr3:67723614_67757148_-; circRNA_4895|Chr4:152465373_152468818_-
GO:0005089	Rho guanyl-nucleotide exchange factor activity	molecular_function	1	16	82	6636	0.016178786	0.022859058	5.057926829	circRNA_3346|Chr2:25924932_25927179_-
GO:0005615	extracellular space	cellular_component	2	16	236	6636	0.017648477	0.024775746	3.514830508	circRNA_3112|Chr19:15151107_15207439_+; circRNA_3235|Chr19:43899905_43908769_-
GO:0072659	protein localization to plasma membrane	biological_process	1	16	92	6636	0.020109308	0.028050563	4.508152174	circRNA_3949|Chr20:20259263_20276110_+
GO:0045211	postsynaptic membrane	cellular_component	1	16	93	6636	0.020522535	0.028445792	4.459677419	circRNA_3949|Chr20:20259263_20276110_+
GO:0030018	Z disc	cellular_component	1	16	97	6636	0.022211249	0.030592852	4.275773196	circRNA_3949|Chr20:20259263_20276110_+
GO:0005085	guanyl-nucleotide exchange factor activity	molecular_function	1	16	102	6636	0.024401404	0.033399421	4.066176471	circRNA_3346|Chr2:25924932_25927179_-
GO:0001077	transcriptional activator activity, RNA polymerase II proximal promoter sequence-specific DNA binding	molecular_function	1	16	105	6636	0.025756948	0.035035849	3.95	circRNA_6631|Chr8:78521649_78538216_-
GO:0016323	basolateral plasma membrane	cellular_component	1	16	110	6636	0.028083811	0.037965152	3.770454545	circRNA_3949|Chr20:20259263_20276110_+
GO:0042383	sarcolemma	cellular_component	1	16	111	6636	0.028559176	0.038370918	3.736486486	circRNA_3949|Chr20:20259263_20276110_+
GO:0000790	nuclear chromatin	cellular_component	1	16	117	6636	0.031479933	0.042037227	3.544871795	circRNA_6631|Chr8:78521649_78538216_-
GO:0035023	regulation of Rho protein signal transduction	biological_process	1	16	123	6636	0.034515686	0.045811728	3.37195122	circRNA_3346|Chr2:25924932_25927179_-
GO:0006508	proteolysis	biological_process	1	16	124	6636	0.035032581	0.046217682	3.344758065	circRNA_3235|Chr19:43899905_43908769_-
GO:0005667	transcription factor complex	cellular_component	1	16	125	6636	0.035552558	0.046622815	3.318	circRNA_6631|Chr8:78521649_78538216_-
GO:0055114	oxidation-reduction process	biological_process	1	16	132	6636	0.039277373	0.051200862	3.142045455	circRNA_5485|Chr5:167014847_167016955_-
GO:0035556	intracellular signal transduction	biological_process	2	16	324	6636	0.040243059	0.052149289	2.560185185	circRNA_3346|Chr2:25924932_25927179_-; circRNA_4895|Chr4:152465373_152468818_-
GO:0000287	magnesium ion binding	molecular_function	1	16	136	6636	0.041471236	0.05342471	3.049632353	circRNA_4895|Chr4:152465373_152468818_-
GO:0044212	transcription regulatory region DNA binding	molecular_function	1	16	138	6636	0.042585602	0.054539455	3.005434783	circRNA_6631|Chr8:78521649_78538216_-
GO:0030027	lamellipodium	cellular_component	1	16	139	6636	0.04314709	0.054937284	2.98381295	circRNA_4253|Chr3:67723614_67757148_-
GO:0007010	cytoskeleton organization	biological_process	1	16	144	6636	0.045996983	0.058227395	2.880208333	circRNA_3949|Chr20:20259263_20276110_+
GO:0007165	signal transduction	biological_process	2	16	345	6636	0.047129544	0.05931822	2.404347826	circRNA_3949|Chr20:20259263_20276110_+; circRNA_4464|Chr3:152985421_153050014_-
GO:0005102	signaling receptor binding	molecular_function	1	16	150	6636	0.049508274	0.061956069	2.765	circRNA_3868|Chr20:3149832_3170181_+
GO:0046777	protein autophosphorylation	biological_process	1	16	152	6636	0.050700356	0.063087375	2.728618421	circRNA_4895|Chr4:152465373_152468818_-
GO:0042803	protein homodimerization activity	molecular_function	2	16	369	6636	0.055689432	0.068903873	2.24796748	circRNA_6631|Chr8:78521649_78538216_-; circRNA_6844|Chr9:11209034_11219449_-
GO:0016020	membrane	cellular_component	3	16	623	6636	0.056248774	0.069204952	1.997191011	circRNA_0858|Chr10:16769713_16774652_-; circRNA_3949|Chr20:20259263_20276110_+; circRNA_4895|Chr4:152465373_152468818_-
GO:0045202	synapse	cellular_component	1	16	165	6636	0.058702894	0.071820859	2.513636364	circRNA_3949|Chr20:20259263_20276110_+
GO:0043065	positive regulation of apoptotic process	biological_process	1	16	171	6636	0.062539228	0.076032786	2.425438596	circRNA_3235|Chr19:43899905_43908769_-
GO:0005737	cytoplasm	cellular_component	8	16	2300	6636	0.063034986	0.076032786	1.442608696	circRNA_2663|Chr17:24052253_24058139_-; circRNA_3235|Chr19:43899905_43908769_-; circRNA_3346|Chr2:25924932_25927179_-; circRNA_4464|Chr3:152985421_153050014_-; circRNA_4895|Chr4:152465373_152468818_-; circRNA_5485|Chr5:167014847_167016955_-; circRNA_6631|Chr8:78521649_78538216_-; circRNA_6844|Chr9:11209034_11219449_-
GO:0030424	axon	cellular_component	1	16	172	6636	0.063187064	0.076032786	2.411337209	circRNA_3949|Chr20:20259263_20276110_+
GO:0016021	integral component of membrane	cellular_component	4	16	960	6636	0.069305828	0.082939761	1.728125	circRNA_0858|Chr10:16769713_16774652_-; circRNA_3868|Chr20:3149832_3170181_+; circRNA_4253|Chr3:67723614_67757148_-; circRNA_6844|Chr9:11209034_11219449_-
GO:0008270	zinc ion binding	molecular_function	2	16	413	6636	0.073233965	0.087164339	2.008474576	circRNA_4915|Chr4:157436084_157436320_-; circRNA_4917|Chr4:157436084_157436371_-
GO:0016477	cell migration	biological_process	1	16	188	6636	0.073866636	0.087442126	2.206117021	circRNA_4253|Chr3:67723614_67757148_-
GO:0016607	nuclear speck	cellular_component	1	16	192	6636	0.076625242	0.090220043	2.16015625	circRNA_6631|Chr8:78521649_78538216_-
GO:0001701	in utero embryonic development	biological_process	1	16	193	6636	0.077320212	0.090551478	2.148963731	circRNA_4253|Chr3:67723614_67757148_-
GO:0009986	cell surface	cellular_component	1	16	198	6636	0.080826331	0.094154077	2.09469697	circRNA_3949|Chr20:20259263_20276110_+
GO:0000978	RNA polymerase II proximal promoter sequence-specific DNA binding	molecular_function	1	16	201	6636	0.082954568	0.09612196	2.063432836	circRNA_6631|Chr8:78521649_78538216_-
GO:0008134	transcription factor binding	molecular_function	1	16	202	6636	0.083668001	0.09643838	2.053217822	circRNA_6631|Chr8:78521649_78538216_-
GO:0044877	protein-containing complex binding	molecular_function	1	16	210	6636	0.089446049	0.102558558	1.975	circRNA_4253|Chr3:67723614_67757148_-
GO:0045296	cadherin binding	molecular_function	1	16	211	6636	0.090176946	0.102858079	1.96563981	circRNA_3949|Chr20:20259263_20276110_+
GO:0043231	intracellular membrane-bounded organelle	cellular_component	2	16	454	6636	0.091630173	0.103974134	1.827092511	circRNA_5485|Chr5:167014847_167016955_-; circRNA_6631|Chr8:78521649_78538216_-
GO:0004672	protein kinase activity	molecular_function	1	16	214	6636	0.092380873	0.104285624	1.938084112	circRNA_4895|Chr4:152465373_152468818_-
GO:0030425	dendrite	cellular_component	1	16	218	6636	0.095345212	0.107080007	1.902522936	circRNA_3949|Chr20:20259263_20276110_+
GO:0003723	RNA binding	molecular_function	1	16	221	6636	0.097587383	0.108485466	1.876696833	circRNA_3346|Chr2:25924932_25927179_-
GO:0043005	neuron projection	cellular_component	1	16	221	6636	0.097587383	0.108485466	1.876696833	circRNA_3949|Chr20:20259263_20276110_+
GO:0019899	enzyme binding	molecular_function	1	16	223	6636	0.099090998	0.109600649	1.859865471	circRNA_2663|Chr17:24052253_24058139_-
GO:0006366	transcription by RNA polymerase II	biological_process	1	16	233	6636	0.106711648	0.117436437	1.780042918	circRNA_6631|Chr8:78521649_78538216_-
GO:0004674	protein serine/threonine kinase activity	molecular_function	1	16	254	6636	0.123231787	0.134938806	1.632874016	circRNA_4895|Chr4:152465373_152468818_-
GO:0046982	protein heterodimerization activity	molecular_function	1	16	264	6636	0.131321958	0.143082133	1.571022727	circRNA_6631|Chr8:78521649_78538216_-
GO:0019901	protein kinase binding	molecular_function	1	16	274	6636	0.139542304	0.151285963	1.513686131	circRNA_4895|Chr4:152465373_152468818_-
GO:0003700	DNA binding transcription factor activity	molecular_function	1	16	275	6636	0.140371119	0.151434852	1.508181818	circRNA_6631|Chr8:78521649_78538216_-
GO:0045893	positive regulation of transcription, DNA-templated	biological_process	1	16	317	6636	0.176145685	0.189097573	1.308359621	circRNA_6631|Chr8:78521649_78538216_-
GO:0005622	intracellular	cellular_component	1	16	365	6636	0.218778882	0.233719878	1.13630137	circRNA_4873|Chr4:147527096_147528435_+
GO:0006468	protein phosphorylation	biological_process	1	16	384	6636	0.235991279	0.250883933	1.080078125	circRNA_4895|Chr4:152465373_152468818_-
GO:0046872	metal ion binding	molecular_function	2	16	711	6636	0.241679339	0.255689735	1.166666667	circRNA_3346|Chr2:25924932_25927179_-; circRNA_4873|Chr4:147527096_147528435_+
GO:0005783	endoplasmic reticulum	cellular_component	1	16	407	6636	0.256984352	0.27057487	1.019041769	circRNA_3112|Chr19:15151107_15207439_+
GO:0005739	mitochondrion	cellular_component	1	16	418	6636	0.267064966	0.279843194	0.99222488	circRNA_5485|Chr5:167014847_167016955_-
GO:0003677	DNA binding	molecular_function	1	16	449	6636	0.295534944	0.308200728	0.923719376	circRNA_6631|Chr8:78521649_78538216_-
GO:0005886	plasma membrane	cellular_component	3	16	1296	6636	0.383033918	0.397556531	0.960069444	circRNA_3346|Chr2:25924932_25927179_-; circRNA_3868|Chr20:3149832_3170181_+; circRNA_3949|Chr20:20259263_20276110_+
GO:0005794	Golgi apparatus	cellular_component	1	16	550	6636	0.387398311	0.400189765	0.754090909	circRNA_6844|Chr9:11209034_11219449_-
GO:0045944	positive regulation of transcription by RNA polymerase II	biological_process	1	16	588	6636	0.421019678	0.432879387	0.705357143	circRNA_6631|Chr8:78521649_78538216_-
GO:0005829	cytosol	cellular_component	4	16	1759	6636	0.424483519	0.434401358	0.943149517	circRNA_3112|Chr19:15151107_15207439_+; circRNA_4895|Chr4:152465373_152468818_-; circRNA_4915|Chr4:157436084_157436320_-; circRNA_4917|Chr4:157436084_157436371_-
GO:0005524	ATP binding	molecular_function	1	16	822	6636	0.607115198	0.618410364	0.504562044	circRNA_4895|Chr4:152465373_152468818_-
GO:0005575	cellular_component	cellular_component	1	16	1043	6636	0.742064133	0.752370579	0.397651007	circRNA_0858|Chr10:16769713_16774652_-
GO:0003674	molecular_function	molecular_function	1	16	1140	6636	0.788706106	0.795975286	0.363815789	circRNA_0858|Chr10:16769713_16774652_-
GO:0005654	nucleoplasm	cellular_component	1	16	1160	6636	0.797434532	0.801092489	0.357543103	circRNA_6631|Chr8:78521649_78538216_-
GO:0005634	nucleus	cellular_component	2	16	2335	6636	0.956496152	0.956496152	0.355246253	circRNA_2663|Chr17:24052253_24058139_-; circRNA_6631|Chr8:78521649_78538216_-
