# Supplementary material for: Comprehensive Analysis of the Profiles of Differentially Expressed mRNAs, lncRNAs, and circRNAs in Phosgene-Induced Acute Lung Injury
Source: Biomed Res Int. 2021 Jan 9;2021:6278526. doi: 10.1155/2021/6278526 (PMC7811572; doi:10.1155/2021/6278526)
Supplement: Supplementary 16 — Table S16: KEGG with differentially expressed mRNAs between the A and B group. [file 6278526.f16.txt]

Table S16 KEGG with differentially expressed mRNAs between A and B group
Classification_level2	Classification_level1	gene_number	percentage	Genes
Cell growth and death	Cellular Processes	24	14.81	Casp12; Casp7; Ctsw; Daxx; Eif2ak2; Irf9; Mlkl; Ngfr; RT1-A1; RT1-A2; RT1-CE10; RT1-CE4; RT1-CE7; RT1-N3; RT1-S3; RT1-T24-1; RT1-T24-3; RT1-T24-4; Serpine1; Stat1; Stat2; Tlr3; Tnfsf10; Zbp1
Cell motility	Cellular Processes	1	0.62	Myl7
Cellular community - eukaryotes	Cellular Processes	6	3.7	Cldn19; Col1a2; Col2a1; Myl7; Tcf7; Wnt2b
Transport and catabolism	Cellular Processes	17	10.49	Cd209e; Ctsw; Dao; Pml; RGD1309995; RT1-A1; RT1-A2; RT1-CE10; RT1-CE4; RT1-CE7; RT1-N3; RT1-S3; RT1-T24-1; RT1-T24-3; RT1-T24-4; Tap1; Tcirg1
Membrane transport	Environmental Information Processing	1	0.62	Tap1
Signal transduction	Environmental Information Processing	39	24.07	Aox2; Atp2b2; Btc; Camk4; Casp7; Ccl12; Cd40lg; Col1a2; Col2a1; Csf1; Cxcl10; Daxx; Ddx58; Dtx3l; Gna14; Hrh1; Ifi47; Irf9; Lpar4; Mlkl; Myl3; Myl4; Ngfr; Osmr; Rag2; Rnf152; Serpine1; Skap1; Socs1; Stat1; Stat2; Tcf7; Tnfrsf13c; Tnfsf10; Tnnc1; Tnni3; Trim25; Wnt2b; Zap70
Signaling molecules and interaction	Environmental Information Processing	37	22.84	Ccl12; Ccr4; Ccr6; Ccr7; Cd27; Cd40lg; Cd6; Cd8a; Cd8b; Cldn19; Col1a2; Col2a1; Csf1; Cxcl10; Grik4; Hrh1; Lpar4; Lrrc4; Ngfr; Osmr; RT1-A1; RT1-A2; RT1-CE10; RT1-CE4; RT1-CE7; RT1-N3; RT1-S3; RT1-T24-1; RT1-T24-3; RT1-T24-4; Rxfp1; Sv2c; Tnfrsf13b; Tnfrsf13c; Tnfrsf14; Tnfsf10; Vcan
Folding, sorting and degradation	Genetic Information Processing	14	8.64	Casp12; Dcp2; Dnaja1; Eif2ak2; Papd7; Pml; Pnpt1; Psmb10; Psmb9; Psme1; Psme2; Socs1; Uba7; Ube2l6
Transcription	Genetic Information Processing	1	0.62	Gtf2f2
Translation	Genetic Information Processing	2	1.23	Eef1a2; Rplp2
Cancers	Human Diseases	30	18.52	Bcl11b; Casp7; Ccr4; Cyp2e1; Ddx3y; Egr3; Eif2ak2; Irf7; Irf9; Lpar4; Ngfr; Pax5; Pgam2; Pml; RT1-A1; RT1-A2; RT1-CE10; RT1-CE4; RT1-CE7; RT1-N3; RT1-S3; RT1-T24-1; RT1-T24-3; RT1-T24-4; Socs1; Sp100; Stat1; Stat2; Tcf7; Wnt2b
Cardiovascular diseases	Human Diseases	20	12.35	Actn2; Ccl12; Cd40lg; Mybpc3; Myh6; Myl3; RT1-A1; RT1-A2; RT1-CE10; RT1-CE4; RT1-CE7; RT1-N3; RT1-S3; RT1-T24-1; RT1-T24-3; RT1-T24-4; Tcf7; Tnnc1; Tnni3; Tnnt2
Endocrine and metabolic diseases	Human Diseases	21	12.96	Casp7; Ccl12; Col1a2; Cyp2e1; Kcnj11; Kcnk2; RT1-A1; RT1-A2; RT1-CE10; RT1-CE4; RT1-CE7; RT1-N3; RT1-S3; RT1-T24-1; RT1-T24-3; RT1-T24-4; Serpine1; Socs1; Stat1; Tcf7; Wnt2b
Immune diseases	Human Diseases	25	15.43	Ccl12; Cd3d; Cd3e; Cd40lg; Cd8a; Cd8b; Csf1; RT1-A1; RT1-A2; RT1-CE10; RT1-CE4; RT1-CE7; RT1-N3; RT1-S3; RT1-T24-1; RT1-T24-3; RT1-T24-4; Rag2; Stat1; Tap1; Tcirg1; Tnfrsf13b; Tnfrsf13c; Trim21; Zap70
Infectious diseases	Human Diseases	66	40.74	Adar; Casp12; Casp7; Ccl12; Ccr4; Cd209e; Cd3d; Cd3e; Cd3g; Cd40lg; Cldn19; Col1a2; Col2a1; Cxcl10; Daxx; Ddx3y; Ddx58; Eef1a2; Egr3; Eif2ak2; Fcer2; Gna14; Ifih1; Ifit1; Ifit1bl; Igtp; Irf1; Irf7; Irf9; Irgm; Isg15; Klrk1; Mx2; Oas1a; Oas1b; Oas2; Oas3; Oasl; Oasl2; Pml; RT1-A1; RT1-A2; RT1-CE10; RT1-CE4; RT1-CE7; RT1-N3; RT1-S3; RT1-T24-1; RT1-T24-3; RT1-T24-4; Rsad2; Serpinb9; Serpine1; Socs1;…
Neurodegenerative diseases	Human Diseases	5	3.09	Casp12; Casp7; Daxx; Uba7; Ube2l6
Substance dependence	Human Diseases	2	1.23	Camk4; Kcnj3
Amino acid metabolism	Metabolism	7	4.32	Abat; Aox2; Cbs; Ckm; Dao; Lap3; Pgam2
Carbohydrate metabolism	Metabolism	3	1.85	Abat; Cmah; Pgam2
Energy metabolism	Metabolism	2	1.23	Car14; Tcirg1
Lipid metabolism	Metabolism	3	1.85	Cyp27a1; Cyp2e1; Pnpla3
Metabolism of cofactors and vitamins	Metabolism	5	3.09	Aox2; Art2b; Gch1; Nampt; Nt5c3a
Metabolism of other amino acids	Metabolism	3	1.85	Abat; Dao; Lap3
Nucleotide metabolism	Metabolism	5	3.09	Cmpk2; Enpp4; Nt5c3a; Pnpt1; Upp1
Xenobiotics biodegradation and metabolism	Metabolism	3	1.85	Aox2; Cyp2e1; Upp1
Aging	Organismal Systems	1	0.62	Camk4
Circulatory system	Organismal Systems	8	4.94	Atp2b2; Myh6; Myl3; Myl4; Ramp3; Tnnc1; Tnni3; Tnnt2
Development	Organismal Systems	8	4.94	Camk4; Csf1; Efnb3; Irf9; Lrrc4; Socs1; Stat1; Stat2
Digestive system	Organismal Systems	6	3.7	Atp2b2; Col1a2; Col2a1; Cyp27a1; Kcnk2; Slc26a3
Endocrine system	Organismal Systems	17	10.49	Atp2b2; Camk4; Col1a2; Cyp27a1; Fabp3; Irf1; Kcnj11; Kcnj3; Kcnk2; Krt13; Myh6; Pgam2; Rxfp1; Socs1; Stat1; Tcf7; Wnt2b
Environmental adaptation	Organismal Systems	1	0.62	Kcnj3
Excretory system	Organismal Systems	1	0.62	Tcirg1
Immune system	Organismal Systems	69	42.59	Adar; Casp12; Ccl12; Ccr4; Ccr6; Ccr7; Cd209e; Cd3d; Cd3e; Cd3g; Cd40lg; Cd5; Cd79b; Cd8a; Cd8b; Cldn19; Col1a2; Csf1; Cxcl10; Ddx3y; Ddx58; Defb4; Dhx58; Egr3; Fcer2; Gbp1; Gbp2; Gbp3; Gbp4; Gbp5; Ifih1; Irf1; Irf7; Irf9; Isg15; Klrk1; Mb21d1; Myl7; Nampt; Oas1a; Oas1b; Oas2; Oas3; Psme1; Psme2; RT1-A1; RT1-A2; RT1-CE10; RT1-CE4; RT1-CE7; RT1-N3; RT1-S3; RT1-T24-1; RT1-T24-3; RT1-T24-4; Serpine1…
Nervous system	Organismal Systems	6	3.7	Abat; Camk4; Grik4; Kcnj3; Ngfr; Tcirg1
Sensory system	Organismal Systems	3	1.85	Ano2; Hrh1; Olr1584
