# Supplementary material for: Comprehensive Analysis of the Profiles of Differentially Expressed mRNAs, lncRNAs, and circRNAs in Phosgene-Induced Acute Lung Injury
Source: Biomed Res Int. 2021 Jan 9;2021:6278526. doi: 10.1155/2021/6278526 (PMC7811572; doi:10.1155/2021/6278526)
Supplement: Supplementary 17 — Table S17: KEGG with differentially expressed lncRNAs between the A and B group. [file 6278526.f17.txt]

Table S17 KEGG with differentially expressed lncRNAs between A and B group
Classification_level2	Classification_level1	gene_number	percentage	Genes
Cell growth and death	Cellular Processes	19	28.79	ENSRNOT00000092503; NR_002155.1; TCONS_00019110; TCONS_00022094; TCONS_00022311; TCONS_00022340; TCONS_00023042; TCONS_00023051; TCONS_00023070; TCONS_00023071; TCONS_00023117; TCONS_00023121; TCONS_00024750; XR_001837812.1; XR_001838945.1; XR_001839825.1; XR_001840518.1; XR_001842563.1; XR_361445.3
Cellular community - eukaryotes	Cellular Processes	12	18.18	TCONS_00001104; TCONS_00010245; TCONS_00010821; XR_001837230.1; XR_001837541.1; XR_001837812.1; XR_001838945.1; XR_001840518.1; XR_001841828.1; XR_592045.2; XR_594934.1; XR_596655.2
Transport and catabolism	Cellular Processes	19	28.79	NR_002155.1; TCONS_00019669; TCONS_00021862; TCONS_00021863; TCONS_00022094; TCONS_00022311; TCONS_00022340; TCONS_00023042; TCONS_00023051; TCONS_00023070; TCONS_00023071; TCONS_00023113; TCONS_00023117; TCONS_00023121; TCONS_00024750; XR_001837541.1; XR_001838416.1; XR_001841711.1; XR_592045.2
Membrane transport	Environmental Information Processing	2	3.03	TCONS_00021862; TCONS_00021863
Signal transduction	Environmental Information Processing	26	39.39	ENSRNOT00000088470; ENSRNOT00000092503; TCONS_00001104; TCONS_00002048; TCONS_00008340; TCONS_00008343; TCONS_00008344; TCONS_00010245; TCONS_00010821; TCONS_00019110; TCONS_00023113; TCONS_00024750; TCONS_00030445; XR_001837230.1; XR_001837812.1; XR_001838477.1; XR_001838945.1; XR_001839825.1; XR_001840129.1; XR_001840518.1; XR_001841828.1; XR_001842563.1; XR_353861.3; XR_353862.3; XR_594631.2; …
Signaling molecules and interaction	Environmental Information Processing	13	19.7	NR_002155.1; TCONS_00010821; TCONS_00022094; TCONS_00022311; TCONS_00022340; TCONS_00023042; TCONS_00023051; TCONS_00023070; TCONS_00023071; TCONS_00023117; TCONS_00023121; XR_359427.1; XR_594354.2
Folding, sorting and degradation	Genetic Information Processing	1	1.52	TCONS_00005424
Replication and repair	Genetic Information Processing	1	1.52	XR_001837617.1
Cancers	Human Diseases	26	39.39	ENSRNOT00000088470; NR_002155.1; TCONS_00001104; TCONS_00010245; TCONS_00010821; TCONS_00022094; TCONS_00022311; TCONS_00022340; TCONS_00023042; TCONS_00023051; TCONS_00023070; TCONS_00023071; TCONS_00023117; TCONS_00023121; TCONS_00024750; XR_001837230.1; XR_001837541.1; XR_001837812.1; XR_001838477.1; XR_001838945.1; XR_001839825.1; XR_001840518.1; XR_361445.3; XR_592045.2; XR_594354.2; XR_5946…
Cardiovascular diseases	Human Diseases	17	25.76	NR_002155.1; TCONS_00022094; TCONS_00022311; TCONS_00022340; TCONS_00023042; TCONS_00023051; TCONS_00023070; TCONS_00023071; TCONS_00023117; TCONS_00023121; XR_001837541.1; XR_001839825.1; XR_001840129.1; XR_001840518.1; XR_592045.2; XR_594354.2; XR_594631.2
Drug resistance	Human Diseases	5	7.58	TCONS_00024750; XR_001837230.1; XR_001839825.1; XR_001840518.1; XR_361445.3
Endocrine and metabolic diseases	Human Diseases	16	24.24	NR_002155.1; TCONS_00001104; TCONS_00010245; TCONS_00022094; TCONS_00022311; TCONS_00022340; TCONS_00023042; TCONS_00023051; TCONS_00023070; TCONS_00023071; TCONS_00023117; TCONS_00023121; TCONS_00026162; XR_001837812.1; XR_001839825.1; XR_001840518.1
Immune diseases	Human Diseases	12	18.18	NR_002155.1; TCONS_00022094; TCONS_00022102; TCONS_00022311; TCONS_00022340; TCONS_00023042; TCONS_00023051; TCONS_00023070; TCONS_00023071; TCONS_00023113; TCONS_00023117; TCONS_00023121
Infectious diseases	Human Diseases	30	45.45	ENSRNOT00000092503; NR_002155.1; TCONS_00001104; TCONS_00002048; TCONS_00010245; TCONS_00010402; TCONS_00010821; TCONS_00022094; TCONS_00022102; TCONS_00022311; TCONS_00022340; TCONS_00023042; TCONS_00023051; TCONS_00023070; TCONS_00023071; TCONS_00023117; TCONS_00023121; TCONS_00024750; TCONS_00030445; XR_001837230.1; XR_001837541.1; XR_001837617.1; XR_001837812.1; XR_001838945.1; XR_001839825.1…
Neurodegenerative diseases	Human Diseases	7	10.61	ENSRNOT00000092503; TCONS_00010821; TCONS_00024750; XR_001837812.1; XR_001839825.1; XR_001840518.1; XR_001842563.1
Substance dependence	Human Diseases	2	3.03	XR_001837230.1; XR_001840518.1
Amino acid metabolism	Metabolism	2	3.03	TCONS_00014246; XR_359962.3
Energy metabolism	Metabolism	1	1.52	TCONS_00023113
Glycan biosynthesis and metabolism	Metabolism	2	3.03	XR_001841218.1; XR_597429.2
Lipid metabolism	Metabolism	2	3.03	XR_001839103.1; XR_593920.2
Metabolism of terpenoids and polyketides	Metabolism	1	1.52	TCONS_00016893
Nucleotide metabolism	Metabolism	2	3.03	XR_001837617.1; XR_001840518.1
Aging	Organismal Systems	2	3.03	TCONS_00026162; XR_001840518.1
Circulatory system	Organismal Systems	2	3.03	XR_001837812.1; XR_001840518.1
Digestive system	Organismal Systems	3	4.55	TCONS_00005424; XR_001837812.1; XR_001840518.1
Endocrine system	Organismal Systems	8	12.12	TCONS_00001104; TCONS_00005424; TCONS_00010245; XR_001837230.1; XR_001837812.1; XR_001838945.1; XR_001840518.1; XR_593920.2
Environmental adaptation	Organismal Systems	1	1.52	XR_001840518.1
Excretory system	Organismal Systems	3	4.55	TCONS_00005424; TCONS_00023113; XR_590452.1
Immune system	Organismal Systems	24	36.36	ENSRNOT00000090535; NR_002155.1; TCONS_00010402; TCONS_00020546; TCONS_00020554; TCONS_00022094; TCONS_00022102; TCONS_00022311; TCONS_00022340; TCONS_00023042; TCONS_00023051; TCONS_00023070; TCONS_00023071; TCONS_00023117; TCONS_00023121; TCONS_00024750; TCONS_00030445; XR_001836935.1; XR_001837230.1; XR_001837812.1; XR_001839825.1; XR_001840518.1; XR_359427.1; XR_594354.2
Nervous system	Organismal Systems	7	10.61	TCONS_00005424; TCONS_00023113; XR_001837230.1; XR_001837812.1; XR_001840129.1; XR_001840518.1; XR_594631.2
Sensory system	Organismal Systems	4	6.06	TCONS_00022909; XR_001837812.1; XR_001840518.1; XR_590452.1
