# Supplementary material for: Comprehensive Analysis of the Profiles of Differentially Expressed mRNAs, lncRNAs, and circRNAs in Phosgene-Induced Acute Lung Injury
Source: Biomed Res Int. 2021 Jan 9;2021:6278526. doi: 10.1155/2021/6278526 (PMC7811572; doi:10.1155/2021/6278526)
Supplement: Supplementary 18 — Table S18: KEGG with differentially expressed circRNAs between the A and B group. [file 6278526.f18.txt]

Table S18 KEGG with differentially expressed circRNAs between A and B group
Classification_level2	Classification_level1	gene_number	percentage	Genes
Cell growth and death	Cellular Processes	1	7.69	circRNA_3871|Chr20:3196267_3282058_+
Cellular community - eukaryotes	Cellular Processes	1	7.69	circRNA_4178|Chr3:44500847_44522988_-
Transport and catabolism	Cellular Processes	1	7.69	circRNA_3871|Chr20:3196267_3282058_+
Signal transduction	Environmental Information Processing	6	46.15	circRNA_1551|Chr12:25431687_25435591_+; circRNA_2246|Chr15:33610716_33637119_-; circRNA_3154|Chr19:29642344_29645344_-; circRNA_4178|Chr3:44500847_44522988_-; circRNA_6087|Chr7:42328501_42339634_+; circRNA_6536|Chr8:67801800_67812158_-
Signaling molecules and interaction	Environmental Information Processing	3	23.08	circRNA_3871|Chr20:3196267_3282058_+; circRNA_4178|Chr3:44500847_44522988_-; circRNA_6087|Chr7:42328501_42339634_+
Folding, sorting and degradation	Genetic Information Processing	2	15.38	circRNA_2171|Chr14:110683107_110709166_+; circRNA_6536|Chr8:67801800_67812158_-
Replication and repair	Genetic Information Processing	1	7.69	circRNA_2171|Chr14:110683107_110709166_+
Transcription	Genetic Information Processing	1	7.69	circRNA_1551|Chr12:25431687_25435591_+
Translation	Genetic Information Processing	1	7.69	circRNA_3425|Chr2:52310449_52313280_+
Cancers	Human Diseases	3	23.08	circRNA_3871|Chr20:3196267_3282058_+; circRNA_3949|Chr20:20259263_20276110_+; circRNA_6087|Chr7:42328501_42339634_+
Cardiovascular diseases	Human Diseases	3	23.08	circRNA_2246|Chr15:33610716_33637119_-; circRNA_3871|Chr20:3196267_3282058_+; circRNA_4178|Chr3:44500847_44522988_-
Endocrine and metabolic diseases	Human Diseases	1	7.69	circRNA_3871|Chr20:3196267_3282058_+
Immune diseases	Human Diseases	1	7.69	circRNA_3871|Chr20:3196267_3282058_+
Infectious diseases	Human Diseases	3	23.08	circRNA_1551|Chr12:25431687_25435591_+; circRNA_3871|Chr20:3196267_3282058_+; circRNA_6536|Chr8:67801800_67812158_-
Carbohydrate metabolism	Metabolism	3	23.08	circRNA_3154|Chr19:29642344_29645344_-; circRNA_5485|Chr5:167014847_167016955_-; circRNA_6844|Chr9:11209034_11219449_-
Circulatory system	Organismal Systems	1	7.69	circRNA_2246|Chr15:33610716_33637119_-
Digestive system	Organismal Systems	1	7.69	circRNA_3235|Chr19:43899905_43908769_-
Endocrine system	Organismal Systems	1	7.69	circRNA_6087|Chr7:42328501_42339634_+
Immune system	Organismal Systems	2	15.38	circRNA_3871|Chr20:3196267_3282058_+; circRNA_6087|Chr7:42328501_42339634_+
