# Supplementary material for: Comprehensive Analysis of the Profiles of Differentially Expressed mRNAs, lncRNAs, and circRNAs in Phosgene-Induced Acute Lung Injury
Source: Biomed Res Int. 2021 Jan 9;2021:6278526. doi: 10.1155/2021/6278526 (PMC7811572; doi:10.1155/2021/6278526)
Supplement: Supplementary 19 — Table S19: KEGG with differentially expressed mRNAs between the B and C group. [file 6278526.f19.txt]

Table S19 KEGG with differentially expressed mRNAs between B and C group
Classification_level2	Classification_level1	gene_number	percentage	Genes
Cellular community - eukaryotes	Cellular Processes	1	7.69	Cttn
Transport and catabolism	Cellular Processes	1	7.69	Mpo
Signal transduction	Environmental Information Processing	3	23.08	Adipoq; Gys2; Plin1
Signaling molecules and interaction	Environmental Information Processing	1	7.69	Cntn1
Translation	Genetic Information Processing	1	7.69	Rpl39l
Cancers	Human Diseases	2	15.38	Cttn; Mpo
Cardiovascular diseases	Human Diseases	1	7.69	Agt
Endocrine and metabolic diseases	Human Diseases	3	23.08	Adipoq; Gys2; Ndufa10l1
Infectious diseases	Human Diseases	1	7.69	Cttn
Neurodegenerative diseases	Human Diseases	1	7.69	Ndufa10l1
Carbohydrate metabolism	Metabolism	1	7.69	Gys2
Energy metabolism	Metabolism	2	15.38	Car3; Ndufa10l1
Lipid metabolism	Metabolism	1	7.69	Pnpla3
Xenobiotics biodegradation and metabolism	Metabolism	1	7.69	Mpo
Aging	Organismal Systems	1	7.69	Adipoq
Circulatory system	Organismal Systems	1	7.69	Agt
Endocrine system	Organismal Systems	5	38.46	Adipoq; Agt; Fabp4; Gys2; Plin1
Environmental adaptation	Organismal Systems	3	23.08	Klb; Ndufa10l1; Plin1
Nervous system	Organismal Systems	1	7.69	Ndufa10l1
