# Supplementary material for: Comprehensive Analysis of the Profiles of Differentially Expressed mRNAs, lncRNAs, and circRNAs in Phosgene-Induced Acute Lung Injury
Source: Biomed Res Int. 2021 Jan 9;2021:6278526. doi: 10.1155/2021/6278526 (PMC7811572; doi:10.1155/2021/6278526)
Supplement: Supplementary 20 — Table S20: KEGG with differentially expressed lncRNAs between the B and C group. [file 6278526.f20.txt]

Table S20 KEGG with differentially expressed lncRNAs between B and C group
Classification_level2	Classification_level1	gene_number	percentage	Genes
Cell growth and death	Cellular Processes	4	19.05	ENSRNOT00000092811; TCONS_00021317; XR_593571.2; XR_593572.2
Cellular community - eukaryotes	Cellular Processes	4	19.05	ENSRNOT00000092811; XR_001840384.1; XR_593571.2; XR_593572.2
Transport and catabolism	Cellular Processes	1	4.76	XR_591499.1
Signal transduction	Environmental Information Processing	6	28.57	ENSRNOT00000092811; XR_001836837.1; XR_001839513.1; XR_001840384.1; XR_593571.2; XR_593572.2
Signaling molecules and interaction	Environmental Information Processing	2	9.52	XR_001838081.1; XR_001840384.1
Folding, sorting and degradation	Genetic Information Processing	3	14.29	ENSRNOT00000082248; TCONS_00005424; XR_595992.2
Replication and repair	Genetic Information Processing	1	4.76	XR_001841743.1
Translation	Genetic Information Processing	2	9.52	ENSRNOT00000082248; XR_001839513.1
Cancers	Human Diseases	3	14.29	ENSRNOT00000092811; XR_593571.2; XR_593572.2
Endocrine and metabolic diseases	Human Diseases	1	4.76	XR_001840384.1
Infectious diseases	Human Diseases	6	28.57	ENSRNOT00000092811; XR_001839513.1; XR_001840384.1; XR_001841893.1; XR_593571.2; XR_593572.2
Energy metabolism	Metabolism	1	4.76	TCONS_00030516
Glycan biosynthesis and metabolism	Metabolism	3	14.29	TCONS_00033624; TCONS_00037056; XR_597429.2
Metabolism of terpenoids and polyketides	Metabolism	1	4.76	TCONS_00016893
Nucleotide metabolism	Metabolism	1	4.76	XR_595992.2
Circulatory system	Organismal Systems	2	9.52	XR_001836837.1; XR_001839513.1
Development	Organismal Systems	1	4.76	TCONS_00034937
Digestive system	Organismal Systems	3	14.29	TCONS_00005424; XR_001836837.1; XR_001840384.1
Endocrine system	Organismal Systems	6	28.57	ENSRNOT00000092811; TCONS_00005424; XR_001836837.1; XR_001840384.1; XR_593571.2; XR_593572.2
Excretory system	Organismal Systems	3	14.29	TCONS_00005424; XR_001836837.1; XR_590452.1
Immune system	Organismal Systems	1	4.76	XR_001840384.1
Nervous system	Organismal Systems	3	14.29	TCONS_00005424; XR_001839513.1; XR_591499.1
Sensory system	Organismal Systems	1	4.76	XR_590452.1
