# Supplementary material for: Comprehensive Analysis of the Profiles of Differentially Expressed mRNAs, lncRNAs, and circRNAs in Phosgene-Induced Acute Lung Injury
Source: Biomed Res Int. 2021 Jan 9;2021:6278526. doi: 10.1155/2021/6278526 (PMC7811572; doi:10.1155/2021/6278526)
Supplement: Supplementary 21 — Table S21: KEGG with differentially expressed circRNAs between the B and C group. [file 6278526.f21.txt]

Table S21 KEGG with differentially expressed circRNAs between B and C group
Classification_level2	Classification_level1	gene_number	percentage	Genes
Cell growth and death	Cellular Processes	1	12.5	circRNA_3868|Chr20:3149832_3170181_+
Cell motility	Cellular Processes	1	12.5	circRNA_4253|Chr3:67723614_67757148_-
Transport and catabolism	Cellular Processes	2	25	circRNA_0858|Chr10:16769713_16774652_-; circRNA_3868|Chr20:3149832_3170181_+
Signaling molecules and interaction	Environmental Information Processing	1	12.5	circRNA_3868|Chr20:3149832_3170181_+
Cancers	Human Diseases	2	25	circRNA_3868|Chr20:3149832_3170181_+; circRNA_3949|Chr20:20259263_20276110_+
Cardiovascular diseases	Human Diseases	1	12.5	circRNA_3868|Chr20:3149832_3170181_+
Endocrine and metabolic diseases	Human Diseases	1	12.5	circRNA_3868|Chr20:3149832_3170181_+
Immune diseases	Human Diseases	2	25	circRNA_0858|Chr10:16769713_16774652_-; circRNA_3868|Chr20:3149832_3170181_+
Infectious diseases	Human Diseases	1	12.5	circRNA_3868|Chr20:3149832_3170181_+
Carbohydrate metabolism	Metabolism	2	25	circRNA_5485|Chr5:167014847_167016955_-; circRNA_6844|Chr9:11209034_11219449_-
Energy metabolism	Metabolism	1	12.5	circRNA_0858|Chr10:16769713_16774652_-
Xenobiotics biodegradation and metabolism	Metabolism	1	12.5	circRNA_3112|Chr19:15151107_15207439_+
Digestive system	Organismal Systems	1	12.5	circRNA_3235|Chr19:43899905_43908769_-
Excretory system	Organismal Systems	1	12.5	circRNA_0858|Chr10:16769713_16774652_-
Immune system	Organismal Systems	1	12.5	circRNA_3868|Chr20:3149832_3170181_+
Nervous system	Organismal Systems	1	12.5	circRNA_0858|Chr10:16769713_16774652_-
