# Supplementary material for: Comprehensive Analysis of the Profiles of Differentially Expressed mRNAs, lncRNAs, and circRNAs in Phosgene-Induced Acute Lung Injury
Source: Biomed Res Int. 2021 Jan 9;2021:6278526. doi: 10.1155/2021/6278526 (PMC7811572; doi:10.1155/2021/6278526)
Supplement: Supplementary 22 — Table S22: circRNA-targeted miRNA. [file 6278526.f22.txt]

Table S22 circRNA-targeted miRNA
miRNA	Transcript	Total score	Total energy	Max score	Max energy	Strand	miRNA length	Transcript length	Position
rno-miR-322-5p	circRNA_0001|Chr1:173697_240941_-	174	-30.07	174	-30.07	1	22	65628	20928
rno-miR-322-5p	circRNA_0002|Chr1:196929_243681_-	174	-30.07	174	-30.07	2	22	42651	21183
rno-miR-323-5p	circRNA_0137|Chr1:63842808_63920657_+	1006	-191.2	169	-32.7	1283	22	73780	11044 18613 47867 55436 23114 59937
rno-miR-323-5p	circRNA_0140|Chr1:65115127_65166133_-	170	-32.46	170	-32.46	1286	22	51007	25924
rno-miR-323-5p	circRNA_0229|Chr1:123934285_123970510_-	169	-32.7	169	-32.7	1375	22	25378	10467
rno-miR-324-5p	circRNA_0138|Chr1:64721324_64732312_+	176	-34.62	176	-34.62	3576	23	10989	3418
rno-miR-324-5p	circRNA_0139|Chr1:64721466_64732312_+	176	-34.62	176	-34.62	3577	23	10847	3276
rno-miR-324-3p	circRNA_0001|Chr1:173697_240941_-	169	-33.22	169	-33.22	4012	22	65628	64190
rno-miR-324-3p	circRNA_0030|Chr1:12128638_12158667_+	160	-30.45	160	-30.45	4041	22	30030	10850
rno-miR-324-3p	circRNA_0083|Chr1:32516246_32530564_+	167	-30.64	167	-30.64	4094	22	14319	5268
rno-miR-324-3p	circRNA_0086|Chr1:36407810_36419485_+	162	-31.21	162	-31.21	4097	22	9907	83
rno-miR-324-3p	circRNA_0196|Chr1:99510577_99533851_+	156	-30.41	156	-30.41	4207	22	12984	12961
rno-miR-324-3p	circRNA_0197|Chr1:99532444_99539093_+	156	-30.41	156	-30.41	4208	22	2115	300
rno-miR-324-3p	circRNA_0240|Chr1:126573474_126583015_+	155	-30.01	155	-30.01	4251	22	9542	6083
rno-miR-324-3p	circRNA_0300|Chr1:142682098_142682602_+	158	-32.8	158	-32.8	4311	22	505	446
rno-miR-324-3p	circRNA_0539|Chr1:214562895_214605872_+	160	-31.45	160	-31.45	4550	22	2781	1082
rno-miR-326-5p	circRNA_0121|Chr1:54423983_54455357_-	150	-30.43	150	-30.43	5851	20	31375	13320
rno-miR-326-5p	circRNA_0123|Chr1:54441038_54455843_-	150	-30.43	150	-30.43	5853	20	14806	13806
rno-miR-326-5p	circRNA_0153|Chr1:79807301_79810373_-	157	-30.39	157	-30.39	5883	20	397	316
rno-miR-326-5p	circRNA_0170|Chr1:84640085_84679646_+	166	-30.73	166	-30.73	5900	20	38065	5957
rno-miR-326-5p	circRNA_0229|Chr1:123934285_123970510_-	157	-32.65	157	-32.65	5959	20	25378	4603
rno-miR-326-5p	circRNA_0279|Chr1:135860270_135871550_-	166	-31.81	166	-31.81	6009	20	363	207
rno-miR-326-3p	circRNA_0136|Chr1:63778610_63845185_+	187	-38.53	187	-38.53	6439	21	65202	64441
rno-miR-326-3p	circRNA_0137|Chr1:63842808_63920657_+	187	-38.53	187	-38.53	6440	21	73780	421
rno-miR-326-3p	circRNA_0161|Chr1:82155654_82156692_+	164	-34.02	164	-34.02	6464	21	533	505
rno-miR-326-3p	circRNA_0409|Chr1:177521072_177569872_+	161	-30.73	161	-30.73	6712	21	48801	18898
rno-miR-326-3p	circRNA_0410|Chr1:177524504_177569872_+	161	-30.73	161	-30.73	6713	21	45369	15466
rno-miR-326-3p	circRNA_0413|Chr1:178364154_178409492_+	176	-36.05	176	-36.05	6716	21	1539	8
rno-miR-326-3p	circRNA_0489|Chr1:201183051_201188802_+	170	-30.25	170	-30.25	6792	21	5217	1894
rno-miR-328a-5p	circRNA_0001|Chr1:173697_240941_-	157	-32.15	157	-32.15	8596	19	65628	35815
rno-miR-328a-5p	circRNA_0002|Chr1:196929_243681_-	157	-32.15	157	-32.15	8597	19	42651	36070
rno-miR-328a-5p	circRNA_0021|Chr1:7392046_7443859_-	163	-31.78	163	-31.78	8616	19	1204	1011
rno-miR-328a-5p	circRNA_0075|Chr1:28253104_28286937_-	163	-31.59	163	-31.59	8670	19	33834	13792
rno-miR-328a-5p	circRNA_0121|Chr1:54423983_54455357_-	164	-30.56	164	-30.56	8716	19	31375	13322
rno-miR-328a-5p	circRNA_0123|Chr1:54441038_54455843_-	164	-30.56	164	-30.56	8718	19	14806	13808
rno-miR-328a-5p	circRNA_0133|Chr1:63714184_63760774_+	154	-30.25	154	-30.25	8728	19	43533	6584
rno-miR-328a-5p	circRNA_0135|Chr1:63760064_63842629_+	163	-34.99	163	-34.99	8730	19	82566	60897
rno-miR-328a-5p	circRNA_0136|Chr1:63778610_63845185_+	163	-34.99	163	-34.99	8731	19	65202	42351
rno-miR-328a-5p	circRNA_0160|Chr1:82139516_82142311_+	162	-31.26	162	-31.26	8755	19	2796	2582
rno-miR-328a-5p	circRNA_0228|Chr1:119464809_119545970_-	159	-35.39	159	-35.39	8823	19	81162	27667
rno-miR-328a-5p	circRNA_0256|Chr1:128501692_128526855_-	155	-31.06	155	-31.06	8851	19	646	530
rno-miR-328a-5p	circRNA_0365|Chr1:167233890_167254701_-	162	-30.42	162	-30.42	8960	19	2009	935
rno-miR-328a-5p	circRNA_0367|Chr1:167246399_167276543_-	162	-30.42	162	-30.42	8962	19	1568	1491
rno-miR-328a-5p	circRNA_0409|Chr1:177521072_177569872_+	323	-65.29	163	-32.97	9004	19	48801	23263 11319
rno-miR-328a-5p	circRNA_0410|Chr1:177524504_177569872_+	323	-65.29	163	-32.97	9005	19	45369	19831 7887
rno-miR-328a-5p	circRNA_0467|Chr1:198932174_198934500_+	164	-34.6	164	-34.6	9062	19	745	222
rno-miR-328a-3p	circRNA_0096|Chr1:39822707_39880408_+	161	-30.02	161	-30.02	9264	22	55618	18901
rno-miR-328a-3p	circRNA_0121|Chr1:54423983_54455357_-	368	-88.19	184	-44.49	9289	22	31375	13505 13676
rno-miR-328a-3p	circRNA_0123|Chr1:54441038_54455843_-	368	-88.19	184	-44.49	9291	22	14806	13991 14162
rno-miR-328a-3p	circRNA_0172|Chr1:86877736_86888952_+	172	-36.56	172	-36.56	9340	22	11217	4986
rno-miR-328a-3p	circRNA_0267|Chr1:131608376_131622341_+	156	-33.57	156	-33.57	9435	22	13966	12733
rno-miR-329-5p	circRNA_0466|Chr1:198801175_198801693_+	168	-32.31	168	-32.31	10207	24	517	72
rno-miR-330-5p	circRNA_0169|Chr1:84542396_84642306_+	169	-30.48	169	-30.48	11056	22	91532	79160
rno-miR-330-5p	circRNA_0196|Chr1:99510577_99533851_+	156	-32.7	156	-32.7	11083	22	12984	11626
rno-miR-330-3p	circRNA_0096|Chr1:39822707_39880408_+	179	-30.24	179	-30.24	11556	23	55618	41018
rno-miR-330-3p	circRNA_0097|Chr1:39841903_39880408_+	179	-30.24	179	-30.24	11557	23	36422	21822
rno-miR-331-3p	circRNA_0111|Chr1:45923228_46014665_+	154	-31.32	154	-31.32	12717	21	456	143
rno-miR-331-3p	circRNA_0168|Chr1:84542396_84615182_+	169	-36.4	169	-36.4	12774	21	64408	8442
rno-miR-331-3p	circRNA_0169|Chr1:84542396_84642306_+	338	-71.04	169	-36.4	12775	21	91532	8442 87983
rno-miR-331-3p	circRNA_0489|Chr1:201183051_201188802_+	167	-30.98	167	-30.98	13095	21	5217	1174
rno-miR-331-3p	circRNA_0515|Chr1:204960841_204975227_+	150	-30.98	150	-30.98	13121	21	14387	5995
rno-miR-336-3p	circRNA_0135|Chr1:63760064_63842629_+	175	-30.13	175	-30.13	15606	24	82566	4712
rno-miR-339-5p	circRNA_0135|Chr1:63760064_63842629_+	156	-30.25	156	-30.25	19617	23	82566	3024
rno-miR-339-5p	circRNA_0240|Chr1:126573474_126583015_+	161	-33.16	161	-33.16	19722	23	9542	1980
rno-miR-339-5p	circRNA_0268|Chr1:132870725_132882910_-	157	-30.71	157	-30.71	19750	23	12186	6912
rno-miR-339-5p	circRNA_0269|Chr1:132874555_132882910_-	157	-30.71	157	-30.71	19751	23	8356	6912
rno-miR-339-5p	circRNA_0351|Chr1:164685554_164686953_+	165	-31.94	165	-31.94	19833	23	1400	312
rno-miR-339-5p	circRNA_0503|Chr1:204267319_204305329_-	320	-65.65	167	-34.87	19985	23	30992	3409 24007
rno-miR-342-3p	circRNA_0066|Chr1:22707360_22707595_-	191	-38.76	191	-38.76	22986	23	144	20
rno-miR-343	circRNA_0135|Chr1:63760064_63842629_+	158	-31.58	158	-31.58	23628	20	82566	25555
rno-miR-343	circRNA_0136|Chr1:63778610_63845185_+	158	-31.58	158	-31.58	23629	20	65202	7009
rno-miR-343	circRNA_0398|Chr1:175364052_175401980_-	164	-32.59	164	-32.59	23891	20	37929	33354
rno-miR-343	circRNA_0409|Chr1:177521072_177569872_+	165	-30.45	165	-30.45	23902	20	48801	8458
rno-miR-343	circRNA_0410|Chr1:177524504_177569872_+	165	-30.45	165	-30.45	23903	20	45369	5026
rno-miR-344a-5p	circRNA_0092|Chr1:37607345_37621662_+	176	-34.99	176	-34.99	24158	19	499	218
rno-miR-345-3p	circRNA_0074|Chr1:28253104_28262294_-	182	-35.99	182	-35.99	25859	22	9191	1248
rno-miR-345-3p	circRNA_0075|Chr1:28253104_28286937_-	182	-35.99	182	-35.99	25860	22	33834	25891
rno-miR-345-3p	circRNA_0096|Chr1:39822707_39880408_+	172	-30.35	172	-30.35	25881	22	55618	45022
rno-miR-345-3p	circRNA_0097|Chr1:39841903_39880408_+	172	-30.35	172	-30.35	25882	22	36422	25826
rno-miR-345-3p	circRNA_0455|Chr1:194853235_194917768_-	316	-62.56	158	-31.28	26240	22	64534	48737 62431
rno-miR-345-3p	circRNA_0456|Chr1:194866929_194917768_-	158	-31.28	158	-31.28	26241	22	50840	48737
rno-miR-346	circRNA_0144|Chr1:72358337_72360751_+	166	-31.28	166	-31.28	26502	23	2415	210
rno-miR-346	circRNA_0168|Chr1:84542396_84615182_+	333	-72	167	-38.1	26526	23	64408	36475 64129
rno-miR-346	circRNA_0169|Chr1:84542396_84642306_+	493	-102.98	167	-38.1	26527	23	91532	36475 64129 65259
rno-miR-346	circRNA_0257|Chr1:128542589_128576607_-	169	-30.13	169	-30.13	26615	23	33121	8345
rno-miR-347	circRNA_0228|Chr1:119464809_119545970_-	160	-31.15	160	-31.15	27159	19	81162	46970
rno-miR-351-5p	circRNA_0137|Chr1:63842808_63920657_+	334	-61.12	167	-30.56	32225	25	73780	36683 73125
rno-miR-351-5p	circRNA_0168|Chr1:84542396_84615182_+	493	-99.35	173	-34.48	32256	25	64408	49256 5867 61330
rno-miR-351-5p	circRNA_0169|Chr1:84542396_84642306_+	650	-132.84	173	-34.48	32257	25	91532	49256 5867 61330 87996
rno-miR-351-5p	circRNA_0212|Chr1:104785950_104795565_+	157	-31.16	157	-31.16	32300	25	1705	823
rno-miR-351-5p	circRNA_0213|Chr1:104785950_104821976_+	157	-31.16	157	-31.16	32301	25	1828	823
rno-miR-351-5p	circRNA_0221|Chr1:107253894_107320767_+	156	-30.35	156	-30.35	32309	25	1012	198
rno-miR-351-5p	circRNA_0229|Chr1:123934285_123970510_-	173	-39.62	173	-39.62	32317	25	25378	24938
rno-miR-351-5p	circRNA_0515|Chr1:204960841_204975227_+	167	-31.12	167	-31.12	32603	25	14387	6400
rno-miR-7a-2-3p	circRNA_0033|Chr1:14983488_14991078_-	171	-34.49	171	-34.49	45873	22	7591	7038
rno-miR-17-1-3p	circRNA_0015|Chr1:6800132_6819230_-	162	-30.97	162	-30.97	53304	22	1452	467
rno-miR-17-1-3p	circRNA_0016|Chr1:6800132_6853903_-	162	-30.97	162	-30.97	53305	22	2987	2002
rno-miR-17-1-3p	circRNA_0017|Chr1:6804365_6816920_-	162	-30.97	162	-30.97	53306	22	805	179
rno-miR-17-1-3p	circRNA_0018|Chr1:6804365_6824947_-	162	-30.97	162	-30.97	53307	22	1315	689
rno-miR-17-1-3p	circRNA_0019|Chr1:6810305_6829781_-	162	-30.97	162	-30.97	53308	22	1429	1226
rno-miR-19b-2-5p	circRNA_0409|Chr1:177521072_177569872_+	179	-31.03	179	-31.03	56563	23	48801	2712
rno-miR-23a-5p	circRNA_0075|Chr1:28253104_28286937_-	157	-31.3	157	-31.3	60240	22	33834	19273
rno-miR-23a-5p	circRNA_0135|Chr1:63760064_63842629_+	178	-34.52	178	-34.52	60300	22	82566	66984
rno-miR-23a-5p	circRNA_0136|Chr1:63778610_63845185_+	178	-34.52	178	-34.52	60301	22	65202	48438
rno-miR-23a-5p	circRNA_0137|Chr1:63842808_63920657_+	150	-31.21	150	-31.21	60302	22	73780	6832
rno-miR-23a-5p	circRNA_0546|Chr1:215905137_215969554_-	327	-61.55	170	-31.3	60711	22	64418	15914 15262
rno-miR-23a-5p	circRNA_0549|Chr1:215934081_215968014_-	327	-61.55	170	-31.3	60714	22	33934	14374 13722
rno-miR-25-5p	circRNA_0021|Chr1:7392046_7443859_-	159	-30.44	159	-30.44	64197	22	1204	590
rno-miR-25-5p	circRNA_0257|Chr1:128542589_128576607_-	174	-36.52	174	-36.52	64433	22	33121	7427
rno-miR-26b-3p	circRNA_0546|Chr1:215905137_215969554_-	166	-31.13	166	-31.13	67587	22	64418	25554
rno-miR-26b-3p	circRNA_0549|Chr1:215934081_215968014_-	166	-31.13	166	-31.13	67590	22	33934	24014
rno-miR-92a-2-5p	circRNA_0160|Chr1:82139516_82142311_+	175	-30.04	175	-30.04	89548	22	2796	55
rno-miR-103-3p	circRNA_0168|Chr1:84542396_84615182_+	152	-30.27	152	-30.27	98724	23	64408	60663
rno-miR-103-3p	circRNA_0169|Chr1:84542396_84642306_+	152	-30.27	152	-30.27	98725	23	91532	60663
rno-miR-103-1-5p	circRNA_0083|Chr1:32516246_32530564_+	167	-30.56	167	-30.56	99212	24	14319	12528
rno-miR-106b-3p	circRNA_0245|Chr1:127619822_127625523_+	166	-30.59	166	-30.59	100520	22	2341	1734
rno-miR-125a-5p	circRNA_0168|Chr1:84542396_84615182_+	173	-32.54	173	-32.54	104454	24	64408	49254
rno-miR-125a-5p	circRNA_0169|Chr1:84542396_84642306_+	173	-32.54	173	-32.54	104455	24	91532	49254
rno-miR-125a-3p	circRNA_0160|Chr1:82139516_82142311_+	161	-30.18	161	-30.18	105019	22	2796	1934
rno-miR-125a-3p	circRNA_0256|Chr1:128501692_128526855_-	169	-32.3	169	-32.3	105115	22	646	59
rno-miR-127-3p	circRNA_0252|Chr1:128030898_128044918_+	168	-31.32	168	-31.32	109122	22	535	27
rno-miR-128-1-5p	circRNA_0111|Chr1:45923228_46014665_+	170	-33.19	170	-33.19	109554	21	456	94
rno-miR-130b-5p	circRNA_0503|Chr1:204267319_204305329_-	167	-30.4	167	-30.4	113384	22	30992	18872
rno-miR-134-5p	circRNA_0333|Chr1:162211000_162242389_+	176	-33.5	176	-33.5	116652	22	542	313
rno-miR-134-5p	circRNA_0334|Chr1:162242149_162242389_+	176	-33.5	176	-33.5	116653	22	241	12
rno-miR-134-3p	circRNA_0552|Chr1:216737401_216742438_-	162	-31.54	162	-31.54	117444	22	388	318
rno-miR-135a-3p	circRNA_0112|Chr1:46197895_46208732_+	167	-30.13	167	-30.13	118150	22	625	34
rno-miR-138-5p	circRNA_0268|Chr1:132870725_132882910_-	180	-31.16	180	-31.16	121171	23	12186	9023
rno-miR-139-5p	circRNA_0001|Chr1:173697_240941_-	335	-63.28	170	-31.9	122623	22	65628	20546 26542
rno-miR-139-5p	circRNA_0002|Chr1:196929_243681_-	335	-63.28	170	-31.9	122624	22	42651	20801 26797
rno-miR-143-5p	circRNA_0501|Chr1:203343400_203385990_+	166	-31.45	166	-31.45	126561	21	7178	4889
rno-miR-145-5p	circRNA_0001|Chr1:173697_240941_-	166	-30.15	166	-30.15	128353	23	65628	61733
rno-miR-145-5p	circRNA_0140|Chr1:65115127_65166133_-	180	-31.63	180	-31.63	128492	23	51007	25549
rno-miR-150-5p	circRNA_0135|Chr1:63760064_63842629_+	350	-66.91	179	-35.91	130779	22	82566	14608 39770
rno-miR-150-5p	circRNA_0136|Chr1:63778610_63845185_+	171	-31	171	-31	130780	22	65202	21224
rno-miR-150-5p	circRNA_0137|Chr1:63842808_63920657_+	716	-143.64	179	-35.91	130781	22	73780	14784 22353 51620 59176
rno-miR-150-5p	circRNA_0565|Chr1:219018599_219028923_+	168	-30.04	168	-30.04	131209	22	453	70
rno-miR-150-3p	circRNA_0133|Chr1:63714184_63760774_+	180	-34.45	180	-34.45	131350	19	43533	15241
rno-miR-150-3p	circRNA_0196|Chr1:99510577_99533851_+	159	-32.01	159	-32.01	131413	19	12984	12922
rno-miR-150-3p	circRNA_0197|Chr1:99532444_99539093_+	159	-32.01	159	-32.01	131414	19	2115	261
rno-miR-185-5p	circRNA_0169|Chr1:84542396_84642306_+	166	-32.54	166	-32.54	141127	22	91532	71575
rno-miR-194-3p	circRNA_0428|Chr1:185501062_185504507_+	179	-32.02	179	-32.02	149981	21	3446	253
rno-miR-204-3p	circRNA_0267|Chr1:131608376_131622341_+	176	-30.38	176	-30.38	158988	22	13966	13270
rno-miR-210-5p	circRNA_0096|Chr1:39822707_39880408_+	161	-30.08	161	-30.08	162255	22	55618	34269
rno-miR-210-5p	circRNA_0097|Chr1:39841903_39880408_+	161	-30.08	161	-30.08	162256	22	36422	15073
rno-miR-210-5p	circRNA_0331|Chr1:161746439_161772618_+	156	-31.02	156	-31.02	162490	22	684	148
rno-miR-210-5p	circRNA_0428|Chr1:185501062_185504507_+	170	-31.68	170	-31.68	162587	22	3446	2409
rno-miR-211-3p	circRNA_0001|Chr1:173697_240941_-	156	-30.16	156	-30.16	163879	20	65628	36384
rno-miR-211-3p	circRNA_0002|Chr1:196929_243681_-	156	-30.16	156	-30.16	163880	20	42651	36639
rno-miR-214-3p	circRNA_0086|Chr1:36407810_36419485_+	165	-32.74	165	-32.74	166829	21	9907	1576
rno-miR-214-3p	circRNA_0192|Chr1:92039556_92043956_-	165	-30.01	165	-30.01	166935	21	359	311
rno-miR-214-3p	circRNA_0409|Chr1:177521072_177569872_+	165	-30.66	165	-30.66	167152	21	48801	23402
rno-miR-214-3p	circRNA_0410|Chr1:177524504_177569872_+	165	-30.66	165	-30.66	167153	21	45369	19970
rno-miR-214-3p	circRNA_0515|Chr1:204960841_204975227_+	165	-31.46	165	-31.46	167258	21	14387	14265
rno-miR-214-3p	circRNA_0518|Chr1:204975105_204980121_+	165	-31.46	165	-31.46	167261	21	5017	1
rno-miR-214-3p	circRNA_0563|Chr1:218878878_218892208_-	166	-30.2	166	-30.2	167306	21	924	826
rno-miR-216a-3p	circRNA_0168|Chr1:84542396_84615182_+	165	-30.22	165	-30.22	168057	22	64408	39594
rno-miR-216a-3p	circRNA_0169|Chr1:84542396_84642306_+	165	-30.22	165	-30.22	168058	22	91532	39594
rno-miR-296-5p	circRNA_0135|Chr1:63760064_63842629_+	157	-30.53	157	-30.53	179484	21	82566	74203
rno-miR-296-5p	circRNA_0136|Chr1:63778610_63845185_+	157	-30.53	157	-30.53	179485	21	65202	55657
rno-miR-296-5p	circRNA_0396|Chr1:175246617_175284224_-	158	-30.42	158	-30.42	179745	21	6546	3920
rno-miR-296-3p	circRNA_0135|Chr1:63760064_63842629_+	165	-30.17	165	-30.17	180057	22	82566	45721
rno-miR-296-3p	circRNA_0136|Chr1:63778610_63845185_+	165	-30.17	165	-30.17	180058	22	65202	27175
rno-miR-296-3p	circRNA_0140|Chr1:65115127_65166133_-	160	-32.67	160	-32.67	180062	22	51007	15819
rno-miR-296-3p	circRNA_0228|Chr1:119464809_119545970_-	170	-32.53	170	-32.53	180150	22	81162	32309
rno-miR-296-3p	circRNA_0398|Chr1:175364052_175401980_-	160	-32.67	160	-32.67	180320	22	37929	27310
rno-miR-296-3p	circRNA_0503|Chr1:204267319_204305329_-	160	-32.33	160	-32.33	180425	22	30992	19109
rno-miR-297	circRNA_0026|Chr1:8155769_8159996_+	193	-33.92	193	-33.92	180521	23	4228	2432
rno-miR-298-5p	circRNA_0041|Chr1:16848502_16875754_+	165	-30.55	165	-30.55	181109	23	11718	6553
rno-miR-298-5p	circRNA_0133|Chr1:63714184_63760774_+	172	-32.36	172	-32.36	181201	23	43533	23863
rno-miR-298-5p	circRNA_0134|Chr1:63736954_63760774_+	172	-32.36	172	-32.36	181202	23	20634	964
rno-miR-298-5p	circRNA_0135|Chr1:63760064_63842629_+	156	-31.38	156	-31.38	181203	23	82566	74224
rno-miR-298-5p	circRNA_0136|Chr1:63778610_63845185_+	156	-31.38	156	-31.38	181204	23	65202	55678
rno-miR-320-5p	circRNA_0229|Chr1:123934285_123970510_-	171	-35.11	171	-35.11	184735	22	25378	6742
rno-miR-320-5p	circRNA_0259|Chr1:128606527_128610574_-	162	-33.96	162	-33.96	184765	22	4048	1552
rno-miR-320-5p	circRNA_0265|Chr1:129274807_129304598_+	159	-30.25	159	-30.25	184771	22	495	372
rno-miR-320-5p	circRNA_0266|Chr1:129297189_129304598_+	159	-30.25	159	-30.25	184772	22	264	141
rno-miR-196b-3p	circRNA_0169|Chr1:84542396_84642306_+	151	-30.16	151	-30.16	186394	23	91532	65271
rno-miR-383-3p	circRNA_0041|Chr1:16848502_16875754_+	156	-30.47	156	-30.47	197726	21	11718	6506
rno-miR-383-3p	circRNA_0409|Chr1:177521072_177569872_+	156	-31.48	156	-31.48	198094	21	48801	17052
rno-miR-383-3p	circRNA_0410|Chr1:177524504_177569872_+	156	-31.48	156	-31.48	198095	21	45369	13620
rno-miR-383-3p	circRNA_0561|Chr1:218832599_218844420_-	156	-30.33	156	-30.33	198246	21	936	764
rno-miR-207	circRNA_0072|Chr1:23775945_23776727_-	167	-30.37	167	-30.37	198330	23	783	476
rno-miR-207	circRNA_0074|Chr1:28253104_28262294_-	172	-30.24	172	-30.24	198332	23	9191	4567
rno-miR-207	circRNA_0075|Chr1:28253104_28286937_-	172	-30.24	172	-30.24	198333	23	33834	29210
rno-miR-207	circRNA_0133|Chr1:63714184_63760774_+	175	-31.68	175	-31.68	198391	23	43533	24116
rno-miR-207	circRNA_0134|Chr1:63736954_63760774_+	175	-31.68	175	-31.68	198392	23	20634	1217
rno-miR-207	circRNA_0137|Chr1:63842808_63920657_+	346	-65.3	173	-32.65	198395	23	73780	26843 63666
rno-miR-361-3p	circRNA_0503|Chr1:204267319_204305329_-	163	-31.87	163	-31.87	201053	24	30992	24661
rno-miR-361-3p	circRNA_0546|Chr1:215905137_215969554_-	156	-30.06	156	-30.06	201096	24	64418	18099
rno-miR-361-3p	circRNA_0549|Chr1:215934081_215968014_-	156	-30.06	156	-30.06	201099	24	33934	16559
rno-miR-483-3p	circRNA_0121|Chr1:54423983_54455357_-	167	-32.36	167	-32.36	203536	22	31375	13423
rno-miR-483-3p	circRNA_0123|Chr1:54441038_54455843_-	167	-32.36	167	-32.36	203538	22	14806	13909
rno-miR-483-3p	circRNA_0137|Chr1:63842808_63920657_+	348	-63.3	174	-31.65	203552	22	73780	26874 63697
rno-miR-370-5p	circRNA_0409|Chr1:177521072_177569872_+	153	-32.49	153	-32.49	204397	24	48801	47952
rno-miR-370-5p	circRNA_0410|Chr1:177524504_177569872_+	153	-32.49	153	-32.49	204398	24	45369	44520
rno-miR-370-3p	circRNA_0015|Chr1:6800132_6819230_-	170	-32.43	170	-32.43	204576	22	1452	999
rno-miR-370-3p	circRNA_0016|Chr1:6800132_6853903_-	170	-32.43	170	-32.43	204577	22	2987	2534
rno-miR-370-3p	circRNA_0017|Chr1:6804365_6816920_-	170	-32.43	170	-32.43	204578	22	805	711
rno-miR-370-3p	circRNA_0018|Chr1:6804365_6824947_-	170	-32.43	170	-32.43	204579	22	1315	1221
rno-miR-370-3p	circRNA_0021|Chr1:7392046_7443859_-	168	-32.07	168	-32.07	204582	22	1204	32
rno-miR-370-3p	circRNA_0022|Chr1:7400275_7443859_-	168	-32.07	168	-32.07	204583	22	408	32
rno-miR-370-3p	circRNA_0023|Chr1:7443692_7443859_-	168	-32.07	168	-32.07	204584	22	168	32
rno-miR-370-3p	circRNA_0111|Chr1:45923228_46014665_+	170	-30.42	170	-30.42	204672	22	456	325
rno-miR-370-3p	circRNA_0324|Chr1:154405931_154425509_+	172	-33.55	172	-33.55	204885	22	1128	947
rno-miR-370-3p	circRNA_0325|Chr1:154405931_154447475_+	172	-33.55	172	-33.55	204886	22	1817	947
rno-miR-370-3p	circRNA_0398|Chr1:175364052_175401980_-	154	-30.73	154	-30.73	204959	22	37929	15465
rno-miR-370-3p	circRNA_0489|Chr1:201183051_201188802_+	333	-67.04	172	-36.25	205050	22	5217	4968 4275
rno-miR-540-5p	circRNA_0503|Chr1:204267319_204305329_-	163	-30.51	163	-30.51	210221	23	30992	24777
rno-miR-540-3p	circRNA_0137|Chr1:63842808_63920657_+	310	-62.02	155	-31.01	210428	22	73780	27664 64487
rno-miR-540-3p	circRNA_0140|Chr1:65115127_65166133_-	153	-30.62	153	-30.62	210431	22	51007	13147
rno-miR-540-3p	circRNA_0503|Chr1:204267319_204305329_-	162	-31.51	162	-31.51	210794	22	30992	13424
rno-miR-20b-3p	circRNA_0133|Chr1:63714184_63760774_+	332	-64.2	166	-32.1	232198	22	43533	51 19763
rno-miR-20b-3p	circRNA_0134|Chr1:63736954_63760774_+	166	-32.1	166	-32.1	232199	22	20634	51
rno-miR-20b-3p	circRNA_0545|Chr1:215905137_215934080_-	178	-31.86	178	-31.86	232610	22	28944	9748
rno-miR-20b-3p	circRNA_0546|Chr1:215905137_215969554_-	178	-31.86	178	-31.86	232611	22	64418	45222
rno-miR-378a-5p	circRNA_0096|Chr1:39822707_39880408_+	165	-30.14	165	-30.14	233880	22	55618	27806
rno-miR-378a-5p	circRNA_0097|Chr1:39841903_39880408_+	165	-30.14	165	-30.14	233881	22	36422	8610
rno-miR-378a-5p	circRNA_0228|Chr1:119464809_119545970_-	161	-31.88	161	-31.88	234012	22	81162	43678
rno-miR-378a-5p	circRNA_0268|Chr1:132870725_132882910_-	158	-32.17	158	-32.17	234052	22	12186	193
rno-miR-378a-5p	circRNA_0269|Chr1:132874555_132882910_-	158	-32.17	158	-32.17	234053	22	8356	193
rno-miR-505-5p	circRNA_0290|Chr1:140131618_140142798_-	167	-33.78	167	-33.78	235220	23	932	101
rno-miR-664-1-5p	circRNA_0140|Chr1:65115127_65166133_-	155	-31.33	155	-31.33	237362	21	51007	4072
rno-miR-466b-3p	circRNA_0026|Chr1:8155769_8159996_+	196	-35.91	196	-35.91	240686	22	4228	3822
rno-miR-466b-3p	circRNA_0057|Chr1:21155684_21211619_+	558	-94.22	188	-32.28	240717	22	5780	1793 1376 1905
rno-miR-466b-3p	circRNA_0058|Chr1:21155741_21211619_+	558	-94.22	188	-32.28	240718	22	5723	1736 1319 1848
rno-miR-466b-3p	circRNA_0135|Chr1:63760064_63842629_+	188	-31.42	188	-31.42	240795	22	82566	22534
rno-miR-466b-3p	circRNA_0136|Chr1:63778610_63845185_+	188	-31.42	188	-31.42	240796	22	65202	3988
rno-miR-466b-3p	circRNA_0409|Chr1:177521072_177569872_+	188	-31.42	188	-31.42	241069	22	48801	29936
rno-miR-466b-3p	circRNA_0410|Chr1:177524504_177569872_+	188	-31.42	188	-31.42	241070	22	45369	26504
rno-miR-466b-2-3p	circRNA_0057|Chr1:21155684_21211619_+	390	-65.86	195	-32.93	241290	21	5780	1488 2182
rno-miR-466b-2-3p	circRNA_0058|Chr1:21155741_21211619_+	390	-65.86	195	-32.93	241291	21	5723	1431 2125
rno-miR-871-5p	circRNA_0135|Chr1:63760064_63842629_+	168	-30.76	168	-30.76	244233	24	82566	21513
rno-miR-871-5p	circRNA_0136|Chr1:63778610_63845185_+	168	-30.76	168	-30.76	244234	24	65202	2967
rno-miR-874-5p	circRNA_0172|Chr1:86877736_86888952_+	158	-30.12	158	-30.12	246562	21	11217	7384
rno-miR-874-5p	circRNA_0555|Chr1:218195598_218197067_+	164	-34.17	164	-34.17	246945	21	1470	1049
rno-miR-874-3p	circRNA_0135|Chr1:63760064_63842629_+	334	-69.21	175	-35.45	247098	22	82566	67895 73959
rno-miR-874-3p	circRNA_0136|Chr1:63778610_63845185_+	334	-69.21	175	-35.45	247099	22	65202	49349 55413
rno-miR-874-3p	circRNA_0201|Chr1:101028250_101029473_-	160	-31.39	160	-31.39	247164	22	733	540
rno-miR-874-3p	circRNA_0228|Chr1:119464809_119545970_-	151	-30.11	151	-30.11	247191	22	81162	29334
rno-miR-874-3p	circRNA_0351|Chr1:164685554_164686953_+	151	-32.02	151	-32.02	247314	22	1400	314
rno-miR-874-3p	circRNA_0503|Chr1:204267319_204305329_-	315	-65.66	164	-35.55	247466	22	30992	10919 3411
rno-miR-877	circRNA_0096|Chr1:39822707_39880408_+	159	-30.63	159	-30.63	247632	20	55618	13650
rno-miR-182	circRNA_0299|Chr1:142576560_142612751_-	174	-31.03	174	-31.03	255857	25	450	132
rno-miR-423-5p	circRNA_0083|Chr1:32516246_32530564_+	164	-31.61	164	-31.61	266528	24	14319	10782
rno-miR-423-5p	circRNA_0133|Chr1:63714184_63760774_+	162	-31.53	162	-31.53	266578	24	43533	31376
rno-miR-423-5p	circRNA_0134|Chr1:63736954_63760774_+	162	-31.53	162	-31.53	266579	24	20634	8477
rno-miR-423-5p	circRNA_0228|Chr1:119464809_119545970_-	172	-32.7	172	-32.7	266673	24	81162	13951
rno-miR-423-3p	circRNA_0034|Chr1:15474913_15494771_+	174	-33.24	174	-33.24	267052	23	805	242
rno-miR-423-3p	circRNA_0035|Chr1:15474913_15526167_+	174	-33.24	174	-33.24	267053	23	1232	242
rno-miR-423-3p	circRNA_0036|Chr1:15488392_15494771_+	174	-33.24	174	-33.24	267054	23	641	78
rno-miR-423-3p	circRNA_0037|Chr1:15488392_15526167_+	174	-33.24	174	-33.24	267055	23	1068	78
rno-miR-423-3p	circRNA_0038|Chr1:15488392_15567557_+	174	-33.24	174	-33.24	267056	23	1800	78
rno-miR-484	circRNA_0159|Chr1:81783691_81788403_+	175	-33.4	175	-33.4	273480	22	1042	275
rno-miR-484	circRNA_0284|Chr1:137239528_137249479_+	159	-30.71	159	-30.71	273605	22	796	185
rno-miR-484	circRNA_0489|Chr1:201183051_201188802_+	168	-33.67	168	-33.67	273810	22	5217	4242
rno-miR-484	circRNA_0503|Chr1:204267319_204305329_-	173	-30.32	173	-30.32	273824	22	30992	11366
rno-miR-500-3p	circRNA_0169|Chr1:84542396_84642306_+	179	-33.01	179	-33.01	275209	22	91532	91161
rno-miR-500-3p	circRNA_0170|Chr1:84640085_84679646_+	179	-33.01	179	-33.01	275210	22	38065	1851
rno-miR-532-3p	circRNA_0135|Chr1:63760064_63842629_+	317	-61.7	160	-31.69	276321	22	82566	74245 51479
rno-miR-532-3p	circRNA_0136|Chr1:63778610_63845185_+	317	-61.7	160	-31.69	276322	22	65202	55699 32933
rno-miR-532-3p	circRNA_0398|Chr1:175364052_175401980_-	153	-30.73	153	-30.73	276584	22	37929	32191
rno-miR-598-5p	circRNA_0462|Chr1:197981834_197983786_-	182	-36.18	182	-36.18	277221	22	1841	484
rno-miR-598-5p	circRNA_0463|Chr1:197981834_197983858_-	182	-36.18	182	-36.18	277222	22	1913	556
rno-miR-672-5p	circRNA_0001|Chr1:173697_240941_-	161	-30.83	161	-30.83	278479	23	65628	46115
rno-miR-672-5p	circRNA_0501|Chr1:203343400_203385990_+	170	-31.53	170	-31.53	278979	23	7178	4644
rno-miR-673-5p	circRNA_0168|Chr1:84542396_84615182_+	180	-30.78	180	-30.78	279792	22	64408	18233
rno-miR-673-5p	circRNA_0169|Chr1:84542396_84642306_+	180	-30.78	180	-30.78	279793	22	91532	18233
rno-miR-673-5p	circRNA_0212|Chr1:104785950_104795565_+	172	-34.42	172	-34.42	279836	22	1705	326
rno-miR-673-5p	circRNA_0213|Chr1:104785950_104821976_+	172	-34.42	172	-34.42	279837	22	1828	326
rno-miR-673-5p	circRNA_0257|Chr1:128542589_128576607_-	159	-36.71	159	-36.71	279881	22	33121	4502
rno-miR-673-5p	circRNA_0331|Chr1:161746439_161772618_+	175	-33.18	175	-33.18	279955	22	684	272
rno-miR-673-3p	circRNA_0016|Chr1:6800132_6853903_-	167	-31.27	167	-31.27	280213	22	2987	1142
rno-miR-673-3p	circRNA_0019|Chr1:6810305_6829781_-	167	-31.27	167	-31.27	280216	22	1429	366
rno-miR-673-3p	circRNA_0503|Chr1:204267319_204305329_-	163	-30.74	163	-30.74	280700	22	30992	12667
rno-miR-674-5p	circRNA_0133|Chr1:63714184_63760774_+	340	-62.95	172	-31.49	280903	22	43533	20264 311
rno-miR-674-5p	circRNA_0135|Chr1:63760064_63842629_+	344	-62.98	172	-31.49	280905	22	82566	3210 19097
rno-miR-674-5p	circRNA_0136|Chr1:63778610_63845185_+	172	-31.49	172	-31.49	280906	22	65202	551
rno-miR-674-5p	circRNA_0137|Chr1:63842808_63920657_+	172	-31.49	172	-31.49	280907	22	73780	40734
rno-miR-674-5p	circRNA_0168|Chr1:84542396_84615182_+	174	-33.31	174	-33.31	280938	22	64408	33929
rno-miR-674-5p	circRNA_0169|Chr1:84542396_84642306_+	345	-63.68	174	-33.31	280939	22	91532	33929 90037
rno-miR-674-5p	circRNA_0170|Chr1:84640085_84679646_+	171	-30.37	171	-30.37	280940	22	38065	727
rno-miR-674-5p	circRNA_0251|Chr1:127881908_127946316_+	169	-31.01	169	-31.01	281021	22	6844	1671
rno-miR-760-5p	circRNA_0075|Chr1:28253104_28286937_-	172	-39.19	172	-39.19	286575	22	33834	5411
rno-miR-760-5p	circRNA_0086|Chr1:36407810_36419485_+	163	-30.78	163	-30.78	286586	22	9907	9218
rno-miR-760-5p	circRNA_0168|Chr1:84542396_84615182_+	167	-36.23	167	-36.23	286668	22	64408	4593
rno-miR-760-5p	circRNA_0169|Chr1:84542396_84642306_+	167	-36.23	167	-36.23	286669	22	91532	4593
rno-miR-760-5p	circRNA_0186|Chr1:91560398_91562180_-	157	-32.61	157	-32.61	286686	22	391	155
rno-miR-760-5p	circRNA_0455|Chr1:194853235_194917768_-	308	-65.5	154	-32.75	286955	22	64534	50336 64030
rno-miR-760-5p	circRNA_0456|Chr1:194866929_194917768_-	154	-32.75	154	-32.75	286956	22	50840	50336
rno-miR-760-5p	circRNA_0471|Chr1:198980252_198980438_+	169	-30.75	169	-30.75	286971	22	187	146
rno-miR-760-3p	circRNA_0144|Chr1:72358337_72360751_+	157	-30.39	157	-30.39	287217	20	2415	857
rno-miR-760-3p	circRNA_0170|Chr1:84640085_84679646_+	153	-30.29	153	-30.29	287243	20	38065	36702
rno-miR-760-3p	circRNA_0455|Chr1:194853235_194917768_-	306	-61.7	153	-30.85	287528	20	64534	47289 60983
rno-miR-760-3p	circRNA_0456|Chr1:194866929_194917768_-	153	-30.85	153	-30.85	287529	20	50840	47289
rno-miR-92b-5p	circRNA_0144|Chr1:72358337_72360751_+	170	-32.93	170	-32.93	290082	24	2415	395
rno-miR-488-3p	circRNA_0433|Chr1:188292400_188302999_+	177	-30.62	177	-30.62	292090	21	734	200
rno-miR-146b-5p	circRNA_0252|Chr1:128030898_128044918_+	168	-32.04	168	-32.04	293628	24	535	181
rno-miR-146b-3p	circRNA_0010|Chr1:2843547_2910994_-	166	-32.14	166	-32.14	293959	21	471	169
rno-miR-146b-3p	circRNA_0011|Chr1:2876047_2910994_-	166	-32.14	166	-32.14	293960	21	230	169
rno-miR-490-3p	circRNA_0229|Chr1:123934285_123970510_-	184	-35.35	184	-35.35	297616	22	25378	7006
rno-miR-1224	circRNA_0083|Chr1:32516246_32530564_+	165	-30.49	165	-30.49	298616	21	14319	12913
rno-miR-1224	circRNA_0140|Chr1:65115127_65166133_-	162	-31.06	162	-31.06	298673	21	51007	11373
rno-miR-1224	circRNA_0168|Chr1:84542396_84615182_+	164	-31.24	164	-31.24	298701	21	64408	57654
rno-miR-1224	circRNA_0169|Chr1:84542396_84642306_+	164	-31.24	164	-31.24	298702	21	91532	57654
rno-miR-1224	circRNA_0455|Chr1:194853235_194917768_-	162	-30.29	162	-30.29	298988	21	64534	87
rno-miR-1224	circRNA_0456|Chr1:194866929_194917768_-	162	-30.29	162	-30.29	298989	21	50840	87
rno-miR-1224	circRNA_0457|Chr1:194917622_194917768_-	162	-30.29	162	-30.29	298990	21	147	87
rno-miR-1224	circRNA_0502|Chr1:204267319_204275972_-	170	-32.9	170	-32.9	299035	21	1635	344
rno-miR-1224	circRNA_0503|Chr1:204267319_204305329_-	170	-32.9	170	-32.9	299036	21	30992	29701
rno-miR-504	circRNA_0503|Chr1:204267319_204305329_-	154	-30.62	154	-30.62	301901	22	30992	28189
rno-miR-615	circRNA_0135|Chr1:63760064_63842629_+	320	-63.21	160	-33.07	305544	22	82566	25295 80386
rno-miR-615	circRNA_0136|Chr1:63778610_63845185_+	320	-63.21	160	-33.07	305545	22	65202	6749 61840
rno-miR-615	circRNA_0168|Chr1:84542396_84615182_+	335	-70.97	177	-40.66	305577	22	64408	59063 24002
rno-miR-615	circRNA_0169|Chr1:84542396_84642306_+	335	-70.97	177	-40.66	305578	22	91532	59063 24002
rno-miR-615	circRNA_0240|Chr1:126573474_126583015_+	160	-30.62	160	-30.62	305649	22	9542	6493
rno-miR-615	circRNA_0296|Chr1:142429023_142442406_-	151	-32.06	151	-32.06	305705	22	346	277
rno-miR-615	circRNA_0371|Chr1:168952768_168964665_+	173	-38.41	173	-38.41	305780	22	11783	7650
rno-miR-615	circRNA_0372|Chr1:168958579_168964665_+	173	-38.41	173	-38.41	305781	22	5972	1839
rno-miR-615	circRNA_0409|Chr1:177521072_177569872_+	476	-96.73	161	-34.67	305818	22	48801	31828 11981 18443
rno-miR-615	circRNA_0410|Chr1:177524504_177569872_+	476	-96.73	161	-34.67	305819	22	45369	28396 8549 15011
rno-miR-653-3p	circRNA_0542|Chr1:215905137_215910920_-	175	-30.37	175	-30.37	308243	22	5784	383
rno-miR-653-3p	circRNA_0543|Chr1:215905137_215914784_-	175	-30.37	175	-30.37	308244	22	9648	4247
rno-miR-653-3p	circRNA_0544|Chr1:215905137_215918638_-	175	-30.37	175	-30.37	308245	22	13502	8101
rno-miR-653-3p	circRNA_0545|Chr1:215905137_215934080_-	875	-151.85	175	-30.37	308246	22	28944	385 4240 8105 11949 23543
rno-miR-653-3p	circRNA_0546|Chr1:215905137_215969554_-	1400	-242.96	175	-30.37	308247	22	64418	385 28123 32021 35859 39714 43579 47423 59017
rno-miR-653-3p	circRNA_0547|Chr1:215926361_215939788_-	525	-91.11	175	-30.37	308248	22	13428	2255 6093 9948
rno-miR-653-3p	circRNA_0548|Chr1:215934081_215939788_-	175	-30.37	175	-30.37	308249	22	5708	2255
rno-miR-653-3p	circRNA_0549|Chr1:215934081_215968014_-	350	-60.74	175	-30.37	308250	22	33934	26583 30481
rno-miR-675-5p	circRNA_0160|Chr1:82139516_82142311_+	150	-30.03	150	-30.03	310153	22	2796	2610
rno-miR-665	circRNA_0096|Chr1:39822707_39880408_+	165	-31.67	165	-31.67	312381	22	55618	13635
rno-miR-665	circRNA_0133|Chr1:63714184_63760774_+	171	-35.38	171	-35.38	312418	22	43533	43343
rno-miR-665	circRNA_0134|Chr1:63736954_63760774_+	171	-35.38	171	-35.38	312419	22	20634	20444
rno-miR-665	circRNA_0135|Chr1:63760064_63842629_+	342	-66.93	171	-35.38	312420	22	82566	521 29906
rno-miR-665	circRNA_0136|Chr1:63778610_63845185_+	333	-63.28	171	-31.73	312421	22	65202	11360 64421
rno-miR-665	circRNA_0137|Chr1:63842808_63920657_+	685	-134.74	178	-34.99	312422	22	73780	15938 52774 38003 401
rno-miR-665	circRNA_0157|Chr1:81095300_81096603_+	165	-31.19	165	-31.19	312442	22	1304	1275
rno-miR-665	circRNA_0217|Chr1:105587865_105589198_+	170	-30.39	170	-30.39	312502	22	238	80
rno-miR-665	circRNA_0218|Chr1:105587865_105633651_+	170	-30.39	170	-30.39	312503	22	3398	80
rno-miR-665	circRNA_0567|Chr1:219353460_219354165_+	163	-30.14	163	-30.14	312852	22	531	224
rno-miR-935	circRNA_0135|Chr1:63760064_63842629_+	157	-30.96	157	-30.96	312993	23	82566	46637
rno-miR-935	circRNA_0136|Chr1:63778610_63845185_+	157	-30.96	157	-30.96	312994	23	65202	28091
rno-miR-201-5p	circRNA_0135|Chr1:63760064_63842629_+	178	-30.94	178	-30.94	313566	20	82566	30755
rno-miR-201-5p	circRNA_0136|Chr1:63778610_63845185_+	178	-30.94	178	-30.94	313567	20	65202	12209
rno-miR-667-5p	circRNA_0001|Chr1:173697_240941_-	172	-32.4	172	-32.4	319735	24	65628	26642
rno-miR-667-5p	circRNA_0002|Chr1:196929_243681_-	172	-32.4	172	-32.4	319736	24	42651	26897
rno-miR-667-5p	circRNA_0144|Chr1:72358337_72360751_+	170	-36.36	170	-36.36	319878	24	2415	1114
rno-miR-667-5p	circRNA_0151|Chr1:78518319_78522187_-	176	-30.28	176	-30.28	319885	24	3869	3500
rno-miR-667-5p	circRNA_0229|Chr1:123934285_123970510_-	172	-30.62	172	-30.62	319963	24	25378	21500
rno-miR-667-5p	circRNA_0409|Chr1:177521072_177569872_+	162	-30.53	162	-30.53	320143	24	48801	26272
rno-miR-667-5p	circRNA_0410|Chr1:177524504_177569872_+	162	-30.53	162	-30.53	320144	24	45369	22840
rno-miR-764-3p	circRNA_0160|Chr1:82139516_82142311_+	152	-30.59	152	-30.59	322186	23	2796	442
rno-miR-764-3p	circRNA_0170|Chr1:84640085_84679646_+	168	-30.28	168	-30.28	322196	23	38065	18995
rno-miR-764-3p	circRNA_0228|Chr1:119464809_119545970_-	169	-30.28	169	-30.28	322254	23	81162	41115
rno-miR-666-3p	circRNA_0267|Chr1:131608376_131622341_+	153	-30.84	153	-30.84	323439	23	13966	11542
rno-miR-666-3p	circRNA_0297|Chr1:142556681_142565170_-	155	-30.26	155	-30.26	323469	23	691	185
rno-miR-678	circRNA_0014|Chr1:6702976_6745333_-	159	-30.49	159	-30.49	324332	22	1237	410
rno-miR-678	circRNA_0561|Chr1:218832599_218844420_-	168	-33.25	168	-33.25	324879	22	936	812
rno-miR-711	circRNA_0268|Chr1:132870725_132882910_-	163	-30.77	163	-30.77	325159	22	12186	5356
rno-miR-711	circRNA_0269|Chr1:132874555_132882910_-	163	-30.77	163	-30.77	325160	22	8356	5356
rno-miR-711	circRNA_0428|Chr1:185501062_185504507_+	165	-31.77	165	-31.77	325319	22	3446	14
rno-miR-3541	circRNA_0001|Chr1:173697_240941_-	326	-62.34	163	-31.53	326611	18	65628	63706 65206
rno-miR-3541	circRNA_0135|Chr1:63760064_63842629_+	322	-62.22	163	-31.19	326745	18	82566	14877 73108
rno-miR-3541	circRNA_0136|Chr1:63778610_63845185_+	159	-31.03	159	-31.03	326746	18	65202	54562
rno-miR-3541	circRNA_0140|Chr1:65115127_65166133_-	161	-31.01	161	-31.01	326750	18	51007	9781
rno-miR-3541	circRNA_0172|Chr1:86877736_86888952_+	155	-31.06	155	-31.06	326782	18	11217	2498
rno-miR-3541	circRNA_0228|Chr1:119464809_119545970_-	161	-31.66	161	-31.66	326838	18	81162	40738
rno-miR-3541	circRNA_0229|Chr1:123934285_123970510_-	167	-31.09	167	-31.09	326839	18	25378	16253
rno-miR-3541	circRNA_0240|Chr1:126573474_126583015_+	158	-31.28	158	-31.28	326850	18	9542	4746
rno-miR-3541	circRNA_0455|Chr1:194853235_194917768_-	167	-30.8	167	-30.8	327065	18	64534	59396
rno-miR-3543	circRNA_0546|Chr1:215905137_215969554_-	165	-30.3	165	-30.3	328302	23	64418	20953
rno-miR-3543	circRNA_0549|Chr1:215934081_215968014_-	165	-30.3	165	-30.3	328305	23	33934	19413
rno-miR-3547	circRNA_0409|Chr1:177521072_177569872_+	165	-31.27	165	-31.27	331030	23	48801	3617
rno-miR-3547	circRNA_0410|Chr1:177524504_177569872_+	165	-31.27	165	-31.27	331031	23	45369	185
rno-miR-3085	circRNA_0050|Chr1:20022792_20047889_+	167	-30.61	167	-30.61	332390	21	1256	419
rno-miR-3550	circRNA_0409|Chr1:177521072_177569872_+	157	-33	157	-33	334468	21	48801	37092
rno-miR-3550	circRNA_0410|Chr1:177524504_177569872_+	157	-33	157	-33	334469	21	45369	33660
rno-miR-3552	circRNA_0082|Chr1:31950617_31962268_-	161	-31.67	161	-31.67	337006	21	777	241
rno-miR-3552	circRNA_0168|Chr1:84542396_84615182_+	183	-39.26	183	-39.26	337092	21	64408	34058
rno-miR-3552	circRNA_0169|Chr1:84542396_84642306_+	366	-78.52	183	-39.26	337093	21	91532	34058 64418
rno-miR-3552	circRNA_0170|Chr1:84640085_84679646_+	183	-39.26	183	-39.26	337094	21	38065	2232
rno-miR-3552	circRNA_0443|Chr1:190557651_190560195_+	166	-30.03	166	-30.03	337367	21	296	49
rno-miR-3552	circRNA_0546|Chr1:215905137_215969554_-	172	-32.74	172	-32.74	337470	21	64418	8490
rno-miR-3552	circRNA_0549|Chr1:215934081_215968014_-	172	-32.74	172	-32.74	337473	21	33934	6950
rno-miR-3557-3p	circRNA_0041|Chr1:16848502_16875754_+	164	-31.45	164	-31.45	340976	22	11718	9462
rno-miR-3557-3p	circRNA_0259|Chr1:128606527_128610574_-	166	-30.22	166	-30.22	341194	22	4048	2
rno-miR-3561-3p	circRNA_0544|Chr1:215905137_215918638_-	169	-30.39	169	-30.39	347782	21	13502	3087
rno-miR-3561-3p	circRNA_0545|Chr1:215905137_215934080_-	169	-30.39	169	-30.39	347783	21	28944	18529
rno-miR-3561-3p	circRNA_0546|Chr1:215905137_215969554_-	169	-30.39	169	-30.39	347784	21	64418	54003
rno-miR-3562	circRNA_0033|Chr1:14983488_14991078_-	172	-31.21	172	-31.21	347844	22	7591	6124
rno-miR-3562	circRNA_0085|Chr1:35307681_35316189_+	174	-30.89	174	-30.89	347896	22	727	375
rno-miR-3562	circRNA_0133|Chr1:63714184_63760774_+	516	-105.33	172	-35.59	347944	22	43533	13389 36981 39447
rno-miR-3562	circRNA_0134|Chr1:63736954_63760774_+	344	-70.46	172	-35.59	347945	22	20634	14082 16548
rno-miR-3562	circRNA_0135|Chr1:63760064_63842629_+	516	-104.61	172	-34.87	347946	22	82566	13280 25126 39336
rno-miR-3562	circRNA_0136|Chr1:63778610_63845185_+	344	-69.74	172	-34.87	347947	22	65202	6580 20790
rno-miR-3562	circRNA_0137|Chr1:63842808_63920657_+	656	-124.85	164	-31.6	347948	22	73780	31521 35538 51173 71980
rno-miR-3562	circRNA_0140|Chr1:65115127_65166133_-	172	-31.21	172	-31.21	347951	22	51007	26054
rno-miR-3562	circRNA_0153|Chr1:79807301_79810373_-	163	-32.89	163	-32.89	347964	22	397	315
rno-miR-3562	circRNA_0168|Chr1:84542396_84615182_+	156	-31.31	156	-31.31	347979	22	64408	50118
rno-miR-3562	circRNA_0169|Chr1:84542396_84642306_+	320	-62.15	164	-31.31	347980	22	91532	90903 50118
rno-miR-3562	circRNA_0170|Chr1:84640085_84679646_+	164	-30.84	164	-30.84	347981	22	38065	1593
rno-miR-3562	circRNA_0190|Chr1:91889856_91902960_+	164	-31.29	164	-31.29	348001	22	1026	506
rno-miR-3562	circRNA_0201|Chr1:101028250_101029473_-	157	-31.44	157	-31.44	348012	22	733	392
rno-miR-3562	circRNA_0206|Chr1:102613968_102660697_-	168	-31.47	168	-31.47	348017	22	1032	684
rno-miR-3562	circRNA_0207|Chr1:102638885_102660697_-	168	-31.47	168	-31.47	348018	22	784	684
rno-miR-3562	circRNA_0296|Chr1:142429023_142442406_-	163	-32.54	163	-32.54	348107	22	346	316
rno-miR-3562	circRNA_0453|Chr1:192952650_192953216_+	164	-30.82	164	-30.82	348264	22	442	351
rno-miR-3562	circRNA_0454|Chr1:192952650_192955267_+	164	-30.82	164	-30.82	348265	22	673	351
rno-miR-3065-3p	circRNA_0568|Chr1:219356188_219357260_+	160	-32.2	160	-32.2	352963	24	656	601
rno-miR-3569	circRNA_0398|Chr1:175364052_175401980_-	177	-32.41	177	-32.41	357377	21	37929	628
rno-miR-3569	circRNA_0409|Chr1:177521072_177569872_+	162	-34.34	162	-34.34	357388	21	48801	38693
rno-miR-3569	circRNA_0410|Chr1:177524504_177569872_+	162	-34.34	162	-34.34	357389	21	45369	35261
rno-miR-3573-3p	circRNA_0083|Chr1:32516246_32530564_+	173	-30.74	173	-30.74	361646	23	14319	12636
rno-miR-3577	circRNA_0135|Chr1:63760064_63842629_+	162	-34.67	162	-34.67	365136	21	82566	3025
rno-miR-3577	circRNA_0151|Chr1:78518319_78522187_-	166	-30.9	166	-30.9	365152	21	3869	3368
rno-miR-3577	circRNA_0169|Chr1:84542396_84642306_+	157	-32.69	157	-32.69	365170	21	91532	77867
rno-miR-3577	circRNA_0427|Chr1:185495031_185495489_+	173	-34.08	173	-34.08	365428	21	459	177
rno-miR-3577	circRNA_0555|Chr1:218195598_218197067_+	170	-30.17	170	-30.17	365556	21	1470	256
rno-miR-133c	circRNA_0539|Chr1:214562895_214605872_+	170	-33.67	170	-33.67	370697	21	2781	909
rno-miR-3583-3p	circRNA_0398|Chr1:175364052_175401980_-	183	-32.42	183	-32.42	371702	22	37929	26123
rno-miR-3584-5p	circRNA_0503|Chr1:204267319_204305329_-	153	-31.14	153	-31.14	372380	18	30992	26659
rno-miR-702-5p	circRNA_0169|Chr1:84542396_84642306_+	161	-30.65	161	-30.65	377203	21	91532	77492
rno-miR-702-3p	circRNA_0075|Chr1:28253104_28286937_-	165	-37.29	165	-37.29	377682	23	33834	19325
rno-miR-702-3p	circRNA_0096|Chr1:39822707_39880408_+	168	-32.63	168	-32.63	377703	23	55618	47800
rno-miR-702-3p	circRNA_0097|Chr1:39841903_39880408_+	168	-32.63	168	-32.63	377704	23	36422	28604
rno-miR-702-3p	circRNA_0140|Chr1:65115127_65166133_-	165	-37.29	165	-37.29	377747	23	51007	21999
rno-miR-702-3p	circRNA_0229|Chr1:123934285_123970510_-	160	-31.76	160	-31.76	377836	23	25378	4326
rno-miR-702-3p	circRNA_0546|Chr1:215905137_215969554_-	165	-37.29	165	-37.29	378153	23	64418	15314
rno-miR-702-3p	circRNA_0549|Chr1:215934081_215968014_-	165	-37.29	165	-37.29	378156	23	33934	13774
rno-miR-3588	circRNA_0096|Chr1:39822707_39880408_+	162	-31.58	162	-31.58	378849	22	55618	50263
rno-miR-3588	circRNA_0097|Chr1:39841903_39880408_+	162	-31.58	162	-31.58	378850	22	36422	31067
rno-miR-3593-5p	circRNA_0135|Chr1:63760064_63842629_+	158	-31.46	158	-31.46	384045	22	82566	29956
rno-miR-3593-5p	circRNA_0136|Chr1:63778610_63845185_+	158	-31.46	158	-31.46	384046	22	65202	11410
rno-miR-3593-5p	circRNA_0228|Chr1:119464809_119545970_-	170	-34.93	170	-34.93	384138	22	81162	75026
rno-miR-3593-5p	circRNA_0503|Chr1:204267319_204305329_-	166	-30.89	166	-30.89	384413	22	30992	20450
rno-miR-3594-5p	circRNA_0086|Chr1:36407810_36419485_+	172	-34.96	172	-34.96	385142	21	9907	4783
rno-miR-3594-5p	circRNA_0290|Chr1:140131618_140142798_-	154	-31.34	154	-31.34	385346	21	932	666
rno-miR-3594-5p	circRNA_0489|Chr1:201183051_201188802_+	162	-30.02	162	-30.02	385545	21	5217	131
rno-miR-3594-3p	circRNA_0169|Chr1:84542396_84642306_+	157	-31.27	157	-31.27	385798	22	91532	85882
rno-miR-328b-3p	circRNA_0121|Chr1:54423983_54455357_-	339	-71.87	171	-36.39	388615	18	31375	13509 13680
rno-miR-328b-3p	circRNA_0123|Chr1:54441038_54455843_-	339	-71.87	171	-36.39	388617	18	14806	13995 14166
rno-miR-1199-5p	circRNA_0156|Chr1:80443035_80446422_-	157	-30.33	157	-30.33	389223	20	785	654
rno-miR-1199-5p	circRNA_0489|Chr1:201183051_201188802_+	152	-31.56	152	-31.56	389556	20	5217	3979
rno-miR-1199-5p	circRNA_0526|Chr1:207108745_207111018_+	157	-30.13	157	-30.13	389593	20	224	122
rno-miR-1199-3p	circRNA_0550|Chr1:216370170_216382773_+	157	-30.81	157	-30.81	390190	21	916	384
rno-miR-1306-5p	circRNA_0242|Chr1:127025462_127025957_+	155	-30.34	155	-30.34	395039	22	496	432
rno-miR-1306-5p	circRNA_0284|Chr1:137239528_137249479_+	161	-30.74	161	-30.74	395081	22	796	501
rno-miR-1306-5p	circRNA_0285|Chr1:137247124_137255698_+	161	-30.74	161	-30.74	395082	22	348	10
rno-miR-1306-5p	circRNA_0286|Chr1:137247124_137257406_+	161	-30.74	161	-30.74	395083	22	481	10
rno-miR-1306-5p	circRNA_0287|Chr1:137247124_137264458_+	161	-30.74	161	-30.74	395084	22	602	10
rno-miR-1306-5p	circRNA_0288|Chr1:137247124_137280380_+	161	-30.74	161	-30.74	395085	22	737	10
rno-miR-3473	circRNA_0168|Chr1:84542396_84615182_+	196	-43.21	196	-43.21	396111	22	64408	47603
rno-miR-3473	circRNA_0169|Chr1:84542396_84642306_+	196	-43.21	196	-43.21	396112	22	91532	47603
rno-miR-6315	circRNA_0075|Chr1:28253104_28286937_-	164	-39.41	164	-39.41	400029	23	33834	17796
rno-miR-6315	circRNA_0096|Chr1:39822707_39880408_+	163	-37.94	163	-37.94	400050	23	55618	26893
rno-miR-6315	circRNA_0097|Chr1:39841903_39880408_+	163	-37.94	163	-37.94	400051	23	36422	7697
rno-miR-6315	circRNA_0140|Chr1:65115127_65166133_-	164	-39.41	164	-39.41	400094	23	51007	33730
rno-miR-6315	circRNA_0376|Chr1:170450030_170450980_-	160	-31.73	160	-31.73	400330	23	565	23
rno-miR-6315	circRNA_0525|Chr1:207040277_207088396_+	161	-32.02	161	-32.02	400479	23	287	212
rno-miR-6315	circRNA_0546|Chr1:215905137_215969554_-	164	-39.41	164	-39.41	400500	23	64418	13850
rno-miR-6315	circRNA_0549|Chr1:215934081_215968014_-	164	-39.41	164	-39.41	400503	23	33934	12310
rno-miR-3102	circRNA_0228|Chr1:119464809_119545970_-	167	-32.31	167	-32.31	400755	21	81162	1405
rno-miR-6316	circRNA_0124|Chr1:56848551_56915732_-	180	-31.08	180	-31.08	401797	23	866	745
rno-miR-6318	circRNA_0014|Chr1:6702976_6745333_-	173	-38.22	173	-38.22	402833	22	1237	1198
rno-miR-6318	circRNA_0083|Chr1:32516246_32530564_+	170	-32.24	170	-32.24	402902	22	14319	8577
rno-miR-6318	circRNA_0212|Chr1:104785950_104795565_+	162	-30.57	162	-30.57	403031	22	1705	1421
rno-miR-6318	circRNA_0213|Chr1:104785950_104821976_+	162	-30.57	162	-30.57	403032	22	1828	1421
rno-miR-6318	circRNA_0214|Chr1:104792188_104795565_+	162	-30.57	162	-30.57	403033	22	612	328
rno-miR-6318	circRNA_0215|Chr1:104792188_104821976_+	162	-30.57	162	-30.57	403034	22	735	328
rno-miR-6318	circRNA_0216|Chr1:104793271_104795565_+	162	-30.57	162	-30.57	403035	22	499	215
rno-miR-6318	circRNA_0229|Chr1:123934285_123970510_-	156	-31.69	156	-31.69	403048	22	25378	11367
rno-miR-6318	circRNA_0267|Chr1:131608376_131622341_+	166	-32.77	166	-32.77	403086	22	13966	12746
rno-miR-6318	circRNA_0409|Chr1:177521072_177569872_+	166	-31.55	166	-31.55	403228	22	48801	13872
rno-miR-6318	circRNA_0410|Chr1:177524504_177569872_+	166	-31.55	166	-31.55	403229	22	45369	10440
rno-miR-6318	circRNA_0428|Chr1:185501062_185504507_+	154	-31.39	154	-31.39	403247	22	3446	1581
rno-miR-6318	circRNA_0546|Chr1:215905137_215969554_-	170	-31.31	170	-31.31	403365	22	64418	23891
rno-miR-6318	circRNA_0549|Chr1:215934081_215968014_-	170	-31.31	170	-31.31	403368	22	33934	22351
rno-miR-6319	circRNA_0001|Chr1:173697_240941_-	157	-30.04	157	-30.04	403393	21	65628	42778
rno-miR-3075	circRNA_0161|Chr1:82155654_82156692_+	169	-32.67	169	-32.67	404126	24	533	14
rno-miR-6325	circRNA_0115|Chr1:47030544_47032563_+	173	-32.3	173	-32.3	408091	23	2020	1121
rno-miR-6325	circRNA_0116|Chr1:47030544_47077979_+	173	-32.3	173	-32.3	408092	23	2311	1121
rno-miR-6328	circRNA_0228|Chr1:119464809_119545970_-	160	-31.78	160	-31.78	409923	21	81162	29204
rno-miR-6328	circRNA_0428|Chr1:185501062_185504507_+	173	-34.28	173	-34.28	410123	21	3446	1069
rno-miR-3072	circRNA_0001|Chr1:173697_240941_-	163	-31.57	163	-31.57	411988	23	65628	41506
rno-miR-3072	circRNA_0002|Chr1:196929_243681_-	163	-31.57	163	-31.57	411989	23	42651	41761
rno-miR-3072	circRNA_0030|Chr1:12128638_12158667_+	150	-30.59	150	-30.59	412017	23	30030	23786
rno-miR-3072	circRNA_0083|Chr1:32516246_32530564_+	153	-31.13	153	-31.13	412070	23	14319	2186
rno-miR-3072	circRNA_0228|Chr1:119464809_119545970_-	153	-31.87	153	-31.87	412215	23	81162	73776
rno-miR-3072	circRNA_0467|Chr1:198932174_198934500_+	174	-30.02	174	-30.02	412454	23	745	612
rno-miR-6332	circRNA_0001|Chr1:173697_240941_-	166	-30.24	166	-30.24	413134	23	65628	59141
rno-miR-6332	circRNA_0096|Chr1:39822707_39880408_+	171	-34.38	171	-34.38	413229	23	55618	48423
rno-miR-6332	circRNA_0097|Chr1:39841903_39880408_+	171	-34.38	171	-34.38	413230	23	36422	29227
rno-miR-6332	circRNA_0148|Chr1:77847821_77847964_+	160	-31.86	160	-31.86	413281	23	144	66
rno-miR-6332	circRNA_0257|Chr1:128542589_128576607_-	159	-30.49	159	-30.49	413390	23	33121	30571
rno-miR-6332	circRNA_0273|Chr1:133407797_133503223_-	167	-32.28	167	-32.28	413406	23	2137	1076
rno-miR-6332	circRNA_0274|Chr1:133448752_133462521_-	167	-32.28	167	-32.28	413407	23	577	19
rno-miR-6332	circRNA_0279|Chr1:135860270_135871550_-	173	-31.52	173	-31.52	413412	23	363	201
rno-miR-6332	circRNA_0297|Chr1:142556681_142565170_-	163	-33.34	163	-33.34	413430	23	691	185
rno-miR-6332	circRNA_0483|Chr1:200648164_200658087_-	189	-40.82	189	-40.82	413616	23	294	37
rno-miR-6332	circRNA_0484|Chr1:200648164_200671090_-	189	-40.82	189	-40.82	413617	23	372	115
rno-miR-6332	circRNA_0485|Chr1:200648164_200672411_-	189	-40.82	189	-40.82	413618	23	639	382
rno-miR-6333	circRNA_0086|Chr1:36407810_36419485_+	161	-30.16	161	-30.16	413792	23	9907	5609
rno-miR-6334	circRNA_0169|Chr1:84542396_84642306_+	175	-30.74	175	-30.74	414448	22	91532	65326
rno-miR-6334	circRNA_0229|Chr1:123934285_123970510_-	151	-31.97	151	-31.97	414508	22	25378	2649
rno-miR-6334	circRNA_0262|Chr1:128978104_128978649_+	159	-34.67	159	-34.67	414541	22	546	174
rno-miR-6334	circRNA_0279|Chr1:135860270_135871550_-	153	-32.96	153	-32.96	414558	22	363	124
rno-miR-6334	circRNA_0432|Chr1:187776387_187777086_-	154	-31.54	154	-31.54	414711	22	254	70
rno-miR-6334	circRNA_0489|Chr1:201183051_201188802_+	330	-64.57	169	-32.32	414768	22	5217	4159 4246
rno-miR-7578	circRNA_0267|Chr1:131608376_131622341_+	167	-31.16	167	-31.16	415119	23	13966	7324
rno-let-7g-3p	circRNA_0497|Chr1:203272587_203272910_+	171	-30.75	171	-30.75	417641	21	324	214
rno-miR-1247-5p	circRNA_0121|Chr1:54423983_54455357_-	167	-32.63	167	-32.63	417838	22	31375	13433
rno-miR-1247-5p	circRNA_0123|Chr1:54441038_54455843_-	167	-32.63	167	-32.63	417840	22	14806	13919
rno-miR-1247-3p	circRNA_0496|Chr1:203194406_203197891_+	155	-33.04	155	-33.04	418786	21	411	381
rno-miR-149-5p	circRNA_0140|Chr1:65115127_65166133_-	175	-31.73	175	-31.73	420722	23	51007	43335
rno-miR-149-5p	circRNA_0169|Chr1:84542396_84642306_+	173	-30.61	173	-30.61	420751	23	91532	82689
rno-miR-149-5p	circRNA_0281|Chr1:137167151_137179777_+	168	-31.33	168	-31.33	420863	23	3382	437
rno-miR-149-5p	circRNA_0282|Chr1:137173179_137179777_+	168	-31.33	168	-31.33	420864	23	3189	244
rno-miR-149-3p	circRNA_0021|Chr1:7392046_7443859_-	158	-33.25	158	-33.25	421176	18	1204	588
rno-miR-149-3p	circRNA_0409|Chr1:177521072_177569872_+	160	-34.42	160	-34.42	421564	18	48801	11742
rno-miR-149-3p	circRNA_0410|Chr1:177524504_177569872_+	160	-34.42	160	-34.42	421565	18	45369	8310
rno-miR-149-3p	circRNA_0428|Chr1:185501062_185504507_+	158	-31.74	158	-31.74	421583	18	3446	37
rno-miR-1896	circRNA_0030|Chr1:12128638_12158667_+	168	-32.9	168	-32.9	424050	18	30030	22073
rno-miR-1896	circRNA_0140|Chr1:65115127_65166133_-	159	-31.22	159	-31.22	424160	18	51007	13357
rno-miR-1896	circRNA_0160|Chr1:82139516_82142311_+	155	-31.21	155	-31.21	424180	18	2796	459
rno-miR-1896	circRNA_0503|Chr1:204267319_204305329_-	163	-30.37	163	-30.37	424523	18	30992	25533
rno-miR-1956-5p	circRNA_0135|Chr1:63760064_63842629_+	158	-30.42	158	-30.42	425874	22	82566	44398
rno-miR-1956-5p	circRNA_0136|Chr1:63778610_63845185_+	158	-30.42	158	-30.42	425875	22	65202	25852
rno-miR-1956-5p	circRNA_0168|Chr1:84542396_84615182_+	154	-30.26	154	-30.26	425907	22	64408	5495
rno-miR-1956-5p	circRNA_0169|Chr1:84542396_84642306_+	154	-30.26	154	-30.26	425908	22	91532	5495
rno-miR-1956-5p	circRNA_0179|Chr1:88145614_88147210_-	162	-32.53	162	-32.53	425918	22	349	210
rno-miR-1956-3p	circRNA_0021|Chr1:7392046_7443859_-	158	-32.84	158	-32.84	426333	18	1204	522
rno-miR-1956-3p	circRNA_0133|Chr1:63714184_63760774_+	166	-30.18	166	-30.18	426445	18	43533	18252
rno-miR-3084a-3p	circRNA_0001|Chr1:173697_240941_-	164	-30.49	164	-30.49	428605	22	65628	42711
rno-miR-3084a-3p	circRNA_0427|Chr1:185495031_185495489_+	180	-30.88	180	-30.88	429031	22	459	437
rno-miR-5132-5p	circRNA_0083|Chr1:32516246_32530564_+	165	-30.37	165	-30.37	433271	22	14319	10598
rno-miR-5132-5p	circRNA_0133|Chr1:63714184_63760774_+	161	-31.51	161	-31.51	433321	22	43533	4969
rno-miR-5132-5p	circRNA_0293|Chr1:142003533_142005043_+	170	-34.53	170	-34.53	433481	22	477	274
rno-miR-5132-3p	circRNA_0083|Chr1:32516246_32530564_+	162	-31.23	162	-31.23	433844	23	14319	9467
rno-miR-762	circRNA_0135|Chr1:63760064_63842629_+	151	-33.62	151	-33.62	434469	18	82566	43964
rno-miR-762	circRNA_0136|Chr1:63778610_63845185_+	151	-33.62	151	-33.62	434470	18	65202	25418
rno-miR-762	circRNA_0140|Chr1:65115127_65166133_-	156	-30.68	156	-30.68	434474	18	51007	34526
rno-miR-466b-4-3p	circRNA_0057|Chr1:21155684_21211619_+	390	-65.86	195	-32.93	434964	21	5780	1488 2182
rno-miR-466b-4-3p	circRNA_0058|Chr1:21155741_21211619_+	390	-65.86	195	-32.93	434965	21	5723	1431 2125
rno-miR-486	circRNA_0172|Chr1:86877736_86888952_+	162	-34.33	162	-34.33	436798	22	11217	10387
rno-miR-709	circRNA_0001|Chr1:173697_240941_-	171	-33.04	171	-33.04	437200	19	65628	35868
rno-miR-709	circRNA_0002|Chr1:196929_243681_-	171	-33.04	171	-33.04	437201	19	42651	36123
rno-miR-709	circRNA_0083|Chr1:32516246_32530564_+	160	-30.76	160	-30.76	437282	19	14319	176
rno-miR-709	circRNA_0135|Chr1:63760064_63842629_+	336	-65.36	169	-32.84	437334	19	82566	1279 17164
rno-miR-709	circRNA_0137|Chr1:63842808_63920657_+	167	-32.84	167	-32.84	437336	19	73780	38788
rno-miR-709	circRNA_0168|Chr1:84542396_84615182_+	159	-30.1	159	-30.1	437367	19	64408	60456
rno-miR-709	circRNA_0169|Chr1:84542396_84642306_+	159	-30.1	159	-30.1	437368	19	91532	60456
rno-miR-709	circRNA_0170|Chr1:84640085_84679646_+	171	-35.4	171	-35.4	437369	19	38065	6217
rno-miR-709	circRNA_0172|Chr1:86877736_86888952_+	155	-30.67	155	-30.67	437371	19	11217	1539
rno-miR-709	circRNA_0228|Chr1:119464809_119545970_-	176	-38.14	176	-38.14	437427	19	81162	7856
rno-miR-709	circRNA_0240|Chr1:126573474_126583015_+	169	-32.62	169	-32.62	437439	19	9542	8900
rno-miR-709	circRNA_0398|Chr1:175364052_175401980_-	169	-32.43	169	-32.43	437597	19	37929	31388
rno-miR-709	circRNA_0462|Chr1:197981834_197983786_-	176	-33.3	176	-33.3	437661	19	1841	790
rno-miR-709	circRNA_0463|Chr1:197981834_197983858_-	176	-33.3	176	-33.3	437662	19	1913	862
rno-miR-323-5p	circRNA_0903|Chr10:43485293_43494367_+	155	-30.19	155	-30.19	2568	22	1472	826
rno-miR-323-5p	circRNA_0911|Chr10:46031966_46055516_+	158	-30.39	158	-30.39	2576	22	21821	17776
rno-miR-323-5p	circRNA_1242|Chr10:110651174_110690679_+	163	-32.98	163	-32.98	2907	22	1148	416
rno-miR-323-5p	circRNA_1243|Chr10:110660436_110690679_+	163	-32.98	163	-32.98	2908	22	745	13
rno-miR-323-5p	circRNA_1440|Chr11:89423014_89502641_-	159	-32.07	159	-32.07	3105	22	3557	3242
rno-miR-323-5p	circRNA_1441|Chr11:89434192_89447041_-	159	-32.07	159	-32.07	3106	22	919	825
rno-miR-324-5p	circRNA_1021|Chr10:66806816_66822005_+	184	-31.28	184	-31.28	7162	23	6053	363
rno-miR-324-5p	circRNA_1287|Chr11:34600704_34624408_+	159	-30.53	159	-30.53	7428	23	15684	13821
rno-miR-324-3p	circRNA_0596|Chr1:222619896_222621077_-	169	-36.74	169	-36.74	7856	22	804	112
rno-miR-324-3p	circRNA_0656|Chr1:242327790_242361812_-	153	-31.7	153	-31.7	7916	22	28598	9868
rno-miR-324-3p	circRNA_0741|Chr1:265331904_265401005_-	167	-30.38	167	-30.38	8001	22	576	430
rno-miR-324-3p	circRNA_0835|Chr10:13931236_13935484_+	162	-32.53	162	-32.53	8095	22	1631	1309
rno-miR-324-3p	circRNA_0913|Chr10:46121866_46127785_+	171	-31.14	171	-31.14	8173	22	796	366
rno-miR-324-3p	circRNA_1208|Chr10:103586432_103677461_-	160	-30.74	160	-30.74	8468	22	84653	62371
rno-miR-324-3p	circRNA_1209|Chr10:103586432_103677527_-	160	-30.74	160	-30.74	8469	22	84719	62437
rno-miR-324-3p	circRNA_1233|Chr10:110043769_110090416_-	163	-31.46	163	-31.46	8493	22	4442	699
rno-miR-324-3p	circRNA_1234|Chr10:110060305_110090416_-	163	-31.46	163	-31.46	8494	22	1849	699
rno-miR-324-3p	circRNA_1287|Chr11:34600704_34624408_+	176	-33.92	176	-33.92	8547	22	15684	14912
rno-miR-324-3p	circRNA_1338|Chr11:61697597_61715073_-	155	-33.42	155	-33.42	8598	22	1179	418
rno-miR-324-3p	circRNA_1565|Chr12:31559990_31576820_+	157	-32.82	157	-32.82	8825	22	749	171
rno-miR-324-3p	circRNA_1603|Chr12:41157218_41200958_+	162	-30.79	162	-30.79	8863	22	34891	28961
rno-miR-324-3p	circRNA_1628|Chr12:51494918_51495425_-	167	-31.31	167	-31.31	8888	22	508	254
rno-miR-324-3p	circRNA_1652|Chr13:35579716_35608096_-	169	-34.2	169	-34.2	8912	22	28381	20756
rno-miR-324-3p	circRNA_1653|Chr13:35579757_35608096_-	169	-34.2	169	-34.2	8913	22	28340	20756
rno-miR-324-3p	circRNA_1654|Chr13:35585251_35608096_-	169	-34.2	169	-34.2	8914	22	22846	20756
rno-miR-326-5p	circRNA_0734|Chr1:264001511_264066989_+	322	-62.27	161	-32.13	11351	20	59084	45779 48817
rno-miR-326-5p	circRNA_0782|Chr1:278731694_278773472_+	153	-30.99	153	-30.99	11399	20	23784	5689
rno-miR-326-5p	circRNA_1249|Chr11:3130814_3142832_+	166	-32.27	166	-32.27	11866	20	814	461
rno-miR-326-5p	circRNA_1250|Chr11:3130982_3142832_+	166	-32.27	166	-32.27	11867	20	646	293
rno-miR-326-5p	circRNA_1251|Chr11:3142305_3142832_+	166	-32.27	166	-32.27	11868	20	528	175
rno-miR-326-3p	circRNA_0596|Chr1:222619896_222621077_-	152	-30.05	152	-30.05	12332	21	804	436
rno-miR-326-3p	circRNA_0952|Chr10:55971256_55986625_+	170	-33.02	170	-33.02	12688	21	15370	12813
rno-miR-326-3p	circRNA_1149|Chr10:91742806_91748081_-	170	-30.48	170	-30.48	12885	21	448	416
rno-miR-326-3p	circRNA_1208|Chr10:103586432_103677461_-	166	-32.27	166	-32.27	12944	21	84653	26494
rno-miR-326-3p	circRNA_1209|Chr10:103586432_103677527_-	166	-32.27	166	-32.27	12945	21	84719	26560
rno-miR-326-3p	circRNA_1239|Chr10:110505762_110508344_+	160	-30.22	160	-30.22	12975	21	664	339
rno-miR-326-3p	circRNA_1240|Chr10:110505762_110509297_+	160	-30.22	160	-30.22	12976	21	874	339
rno-miR-326-3p	circRNA_1603|Chr12:41157218_41200958_+	158	-33.11	158	-33.11	13339	21	34891	33812
rno-miR-326-3p	circRNA_1686|Chr13:44973521_44975133_+	173	-33.65	173	-33.65	13422	21	223	40
rno-miR-326-3p	circRNA_1687|Chr13:44973524_44975133_+	173	-33.65	173	-33.65	13423	21	220	37
rno-miR-327	circRNA_0734|Chr1:264001511_264066989_+	167	-33.57	167	-33.57	13589	19	59084	4570
rno-miR-327	circRNA_0793|Chr10:574395_591107_-	162	-30.18	162	-30.18	13648	19	1180	352
rno-miR-327	circRNA_0794|Chr10:574395_593608_-	162	-30.18	162	-30.18	13649	19	1273	445
rno-miR-327	circRNA_0795|Chr10:574404_593608_-	162	-30.18	162	-30.18	13650	19	1264	445
rno-miR-327	circRNA_1432|Chr11:89175425_89227006_-	165	-31.71	165	-31.71	14287	19	46913	7842
rno-miR-328a-5p	circRNA_0734|Chr1:264001511_264066989_+	165	-35.26	165	-35.26	16946	19	59084	48610
rno-miR-328a-5p	circRNA_0782|Chr1:278731694_278773472_+	163	-31.88	163	-31.88	16994	19	23784	23760
rno-miR-328a-5p	circRNA_0819|Chr10:5100271_5130612_-	166	-32.91	166	-32.91	17031	19	813	602
rno-miR-328a-5p	circRNA_0849|Chr10:16699071_16730140_-	154	-30.33	154	-30.33	17061	19	2129	680
rno-miR-328a-5p	circRNA_0850|Chr10:16706378_16730140_-	154	-30.33	154	-30.33	17062	19	1993	680
rno-miR-328a-5p	circRNA_0851|Chr10:16724062_16725151_-	154	-30.33	154	-30.33	17063	19	1090	359
rno-miR-328a-5p	circRNA_0852|Chr10:16724062_16727861_-	154	-30.33	154	-30.33	17064	19	1216	485
rno-miR-328a-5p	circRNA_0853|Chr10:16724062_16730113_-	154	-30.33	154	-30.33	17065	19	1384	653
rno-miR-328a-5p	circRNA_0854|Chr10:16724062_16730140_-	154	-30.33	154	-30.33	17066	19	1411	680
rno-miR-328a-5p	circRNA_0855|Chr10:16724062_16730192_-	154	-30.33	154	-30.33	17067	19	1463	732
rno-miR-328a-5p	circRNA_0919|Chr10:47810268_47831888_-	164	-31.81	164	-31.81	17131	19	1605	1005
rno-miR-328a-5p	circRNA_0952|Chr10:55971256_55986625_+	319	-64.17	162	-33.65	17164	19	15370	1133 11884
rno-miR-328a-5p	circRNA_0994|Chr10:62623758_62664462_-	150	-32.17	150	-32.17	17206	19	35368	34146
rno-miR-328a-5p	circRNA_1107|Chr10:85152702_85172858_-	158	-31.09	158	-31.09	17319	19	1200	722
rno-miR-328a-5p	circRNA_1127|Chr10:86738917_86740781_+	158	-31.13	158	-31.13	17339	19	494	219
rno-miR-328a-5p	circRNA_1128|Chr10:86738917_86743558_+	158	-31.13	158	-31.13	17340	19	681	219
rno-miR-328a-5p	circRNA_1136|Chr10:89036545_89074755_+	311	-65.55	160	-34.39	17348	19	33782	16526 23875
rno-miR-328a-5p	circRNA_1208|Chr10:103586432_103677461_-	171	-38.7	171	-38.7	17420	19	84653	44887
rno-miR-328a-5p	circRNA_1209|Chr10:103586432_103677527_-	171	-38.7	171	-38.7	17421	19	84719	44953
rno-miR-328a-5p	circRNA_1414|Chr11:85618881_85633288_+	167	-34.81	167	-34.81	17626	19	14408	7611
rno-miR-328a-5p	circRNA_1525|Chr12:23194239_23233218_+	163	-31.4	163	-31.4	17737	19	38980	16532
rno-miR-328a-5p	circRNA_1621|Chr12:47445850_47451149_-	157	-34.75	157	-34.75	17833	19	840	471
rno-miR-328a-5p	circRNA_1692|Chr13:49778831_49798965_-	152	-35.35	152	-35.35	17904	19	15073	2176
rno-miR-328a-3p	circRNA_1422|Chr11:87896642_87908586_+	162	-30.04	162	-30.04	18753	22	1257	1161
rno-miR-328a-3p	circRNA_1447|Chr12:589609_632694_-	166	-30.93	166	-30.93	18778	22	39412	26349
rno-miR-328a-3p	circRNA_1490|Chr12:10527308_10545048_-	163	-30.19	163	-30.19	18821	22	10942	3854
rno-miR-328a-3p	circRNA_1535|Chr12:24505864_24511621_-	162	-33.42	162	-33.42	18866	22	5758	2091
rno-miR-328a-3p	circRNA_1688|Chr13:48796656_48807858_+	159	-30.07	159	-30.07	19019	22	4436	1781
rno-miR-329-5p	circRNA_1692|Chr13:49778831_49798965_-	177	-36.2	177	-36.2	20142	24	15073	13948
rno-miR-330-5p	circRNA_0596|Chr1:222619896_222621077_-	171	-34.76	171	-34.76	21284	22	804	434
rno-miR-330-5p	circRNA_0656|Chr1:242327790_242361812_-	166	-32.38	166	-32.38	21344	22	28598	9981
rno-miR-330-5p	circRNA_0734|Chr1:264001511_264066989_+	170	-33.85	170	-33.85	21422	22	59084	50728
rno-miR-330-5p	circRNA_0887|Chr10:37163046_37172772_-	171	-31.6	171	-31.6	21575	22	836	214
rno-miR-330-5p	circRNA_0888|Chr10:37166067_37178344_-	171	-31.6	171	-31.6	21576	22	726	437
rno-miR-330-5p	circRNA_0994|Chr10:62623758_62664462_-	163	-30.77	163	-30.77	21682	22	35368	35274
rno-miR-330-5p	circRNA_1603|Chr12:41157218_41200958_+	167	-33.92	167	-33.92	22291	22	34891	11236
rno-miR-330-5p	circRNA_1605|Chr12:41465578_41466994_+	163	-33.28	163	-33.28	22293	22	397	71
rno-miR-330-3p	circRNA_0608|Chr1:225202410_225203090_-	176	-30.56	176	-30.56	22415	23	681	496
rno-miR-330-3p	circRNA_0938|Chr10:48452001_48484868_+	180	-34.09	180	-34.09	22745	23	14722	13316
rno-miR-331-3p	circRNA_1013|Chr10:65011337_65013622_-	161	-32.91	161	-32.91	25058	21	2286	644
rno-miR-331-3p	circRNA_1221|Chr10:108486117_108494849_+	156	-30.56	156	-30.56	25266	21	3577	3481
rno-miR-331-3p	circRNA_1432|Chr11:89175425_89227006_-	170	-31.77	170	-31.77	25477	21	46913	42434
rno-miR-331-3p	circRNA_1525|Chr12:23194239_23233218_+	321	-64.32	165	-32.3	25570	21	38980	10481 21160
rno-miR-331-3p	circRNA_1603|Chr12:41157218_41200958_+	152	-30.97	152	-30.97	25648	21	34891	16220
rno-miR-331-3p	circRNA_1625|Chr12:49449153_49467896_+	161	-33.43	161	-33.43	25670	21	4636	1161
rno-miR-331-3p	circRNA_1647|Chr13:32453777_32469550_-	161	-33.79	161	-33.79	25692	21	15774	1237
rno-miR-148b-5p	circRNA_1218|Chr10:106673704_106699402_+	175	-32.64	175	-32.64	34215	22	24691	4270
rno-miR-339-5p	circRNA_0656|Chr1:242327790_242361812_-	161	-30.18	161	-30.18	38129	23	28598	2295
rno-miR-339-5p	circRNA_1208|Chr10:103586432_103677461_-	163	-32.86	163	-32.86	38681	23	84653	62388
rno-miR-339-5p	circRNA_1209|Chr10:103586432_103677527_-	163	-32.86	163	-32.86	38682	23	84719	62454
rno-miR-339-5p	circRNA_1351|Chr11:68722906_68730129_-	161	-31.89	161	-31.89	38824	23	682	239
rno-miR-339-5p	circRNA_1603|Chr12:41157218_41200958_+	167	-31.61	167	-31.61	39076	23	34891	1683
rno-miR-339-3p	circRNA_1218|Chr10:106673704_106699402_+	170	-33.01	170	-33.01	39810	23	24691	10499
rno-miR-343	circRNA_0994|Chr10:62623758_62664462_-	161	-31.91	161	-31.91	46300	20	35368	20444
rno-miR-343	circRNA_1104|Chr10:82894925_82900142_+	150	-31.15	150	-31.15	46410	20	5218	4643
rno-miR-343	circRNA_1208|Chr10:103586432_103677461_-	165	-30.14	165	-30.14	46514	20	84653	43281
rno-miR-343	circRNA_1209|Chr10:103586432_103677527_-	165	-30.14	165	-30.14	46515	20	84719	43347
rno-miR-343	circRNA_1260|Chr11:24479964_24556418_-	160	-32.67	160	-32.67	46566	20	6998	1919
rno-miR-343	circRNA_1652|Chr13:35579716_35608096_-	161	-30.91	161	-30.91	46958	20	28381	4851
rno-miR-343	circRNA_1653|Chr13:35579757_35608096_-	161	-30.91	161	-30.91	46959	20	28340	4851
rno-miR-343	circRNA_1654|Chr13:35585251_35608096_-	161	-30.91	161	-30.91	46960	20	22846	4851
rno-miR-343	circRNA_1655|Chr13:35597462_35608096_-	161	-30.91	161	-30.91	46961	20	10635	4851
rno-miR-345-3p	circRNA_0952|Chr10:55971256_55986625_+	161	-31.62	161	-31.62	50734	22	15370	12337
rno-miR-345-3p	circRNA_1453|Chr12:1741488_1743734_-	160	-30.23	160	-30.23	51235	22	2247	2002
rno-miR-345-3p	circRNA_1503|Chr12:14608110_14703546_-	170	-33.4	170	-33.4	51285	22	1501	388
rno-miR-345-3p	circRNA_1504|Chr12:14624870_14703546_-	170	-33.4	170	-33.4	51286	22	1094	388
rno-miR-345-3p	circRNA_1505|Chr12:14654706_14703546_-	170	-33.4	170	-33.4	51287	22	785	388
rno-miR-346	circRNA_0935|Chr10:48433396_48438287_+	165	-31.76	165	-31.76	51836	23	461	299
rno-miR-346	circRNA_1208|Chr10:103586432_103677461_-	171	-30.43	171	-30.43	52109	23	84653	7550
rno-miR-346	circRNA_1209|Chr10:103586432_103677527_-	171	-30.43	171	-30.43	52110	23	84719	7616
rno-miR-346	circRNA_1211|Chr10:104935806_104999940_+	378	-80.96	189	-40.48	52112	23	61976	25833 47746
rno-miR-346	circRNA_1212|Chr10:104956981_104999940_+	378	-80.96	189	-40.48	52113	23	40801	4658 26571
rno-miR-346	circRNA_1213|Chr10:104980533_104999940_+	189	-40.48	189	-40.48	52114	23	17249	3019
rno-miR-346	circRNA_1525|Chr12:23194239_23233218_+	181	-33.99	181	-33.99	52426	23	38980	27966
rno-miR-347	circRNA_1603|Chr12:41157218_41200958_+	168	-31.92	168	-31.92	53623	19	34891	32168
rno-miR-347	circRNA_1626|Chr12:49467762_49550197_+	169	-30.74	169	-30.74	53646	19	498	425
rno-miR-349	circRNA_0911|Chr10:46031966_46055516_+	157	-30.04	157	-30.04	54050	22	21821	8281
rno-miR-349	circRNA_1484|Chr12:9309987_9324674_-	163	-30.62	163	-30.62	54623	22	11165	8360
rno-miR-351-5p	circRNA_0734|Chr1:264001511_264066989_+	159	-31.5	159	-31.5	62825	25	59084	13550
rno-miR-351-5p	circRNA_0956|Chr10:57327447_57328855_+	157	-34.16	157	-34.16	63047	25	445	34
rno-miR-351-5p	circRNA_1181|Chr10:95265354_95268582_-	166	-36.48	166	-36.48	63272	25	1425	999
rno-miR-351-5p	circRNA_1208|Chr10:103586432_103677461_-	160	-31.29	160	-31.29	63299	25	84653	6683
rno-miR-351-5p	circRNA_1209|Chr10:103586432_103677527_-	160	-31.29	160	-31.29	63300	25	84719	6749
rno-miR-351-5p	circRNA_1285|Chr11:34462325_34500943_-	154	-34.5	154	-34.5	63376	25	1553	803
rno-miR-351-5p	circRNA_1286|Chr11:34495233_34500943_-	154	-34.5	154	-34.5	63377	25	1281	803
rno-miR-351-5p	circRNA_1363|Chr11:70797120_70799636_-	153	-32.58	153	-32.58	63454	25	339	173
rno-miR-351-5p	circRNA_1364|Chr11:70797120_70806783_-	153	-32.58	153	-32.58	63455	25	516	350
rno-miR-351-5p	circRNA_1365|Chr11:70797120_70811760_-	153	-32.58	153	-32.58	63456	25	772	606
rno-miR-351-5p	circRNA_1366|Chr11:70797120_70820621_-	153	-32.58	153	-32.58	63457	25	841	675
rno-miR-351-5p	circRNA_1535|Chr12:24505864_24511621_-	175	-32.59	175	-32.59	63626	25	5758	1110
rno-miR-351-5p	circRNA_1603|Chr12:41157218_41200958_+	318	-63.21	159	-32.53	63694	25	34891	12581 26627
rno-miR-351-5p	circRNA_1652|Chr13:35579716_35608096_-	336	-63.17	169	-32.99	63743	25	28381	1938 6176
rno-miR-351-5p	circRNA_1653|Chr13:35579757_35608096_-	336	-63.17	169	-32.99	63744	25	28340	1938 6176
rno-miR-351-5p	circRNA_1654|Chr13:35585251_35608096_-	336	-63.17	169	-32.99	63745	25	22846	1938 6176
rno-miR-351-5p	circRNA_1655|Chr13:35597462_35608096_-	336	-63.17	169	-32.99	63746	25	10635	1938 6176
rno-miR-351-3p	circRNA_1394|Chr11:79742322_79778947_-	171	-31.1	171	-31.1	64604	21	21793	17023
rno-miR-351-3p	circRNA_1525|Chr12:23194239_23233218_+	158	-30.32	158	-30.32	64735	21	38980	7080
rno-miR-135b-3p	circRNA_0634|Chr1:235720725_235737635_-	175	-30.11	175	-30.11	67201	22	918	79
rno-let-7b-5p	circRNA_1208|Chr10:103586432_103677461_-	179	-32.67	179	-32.67	76727	22	84653	48072
rno-let-7b-5p	circRNA_1209|Chr10:103586432_103677527_-	179	-32.67	179	-32.67	76728	22	84719	48138
rno-miR-23a-5p	circRNA_0656|Chr1:242327790_242361812_-	178	-34.52	178	-34.52	117578	22	28598	26382
rno-miR-23a-5p	circRNA_1670|Chr13:42572179_42616611_-	166	-30.36	166	-30.36	118592	22	10802	5398
rno-miR-23a-5p	circRNA_1692|Chr13:49778831_49798965_-	166	-31.27	166	-31.27	118614	22	15073	14611
rno-miR-25-3p	circRNA_0724|Chr1:260774582_260791888_+	170	-31.06	170	-31.06	126598	22	17307	10400
rno-miR-25-3p	circRNA_0866|Chr10:20741182_20746474_-	158	-32.88	158	-32.88	126740	22	314	118
rno-miR-28-3p	circRNA_0730|Chr1:262786087_262811422_-	176	-33.84	176	-33.84	137794	22	25336	16966
rno-miR-29a-3p	circRNA_1136|Chr10:89036545_89074755_+	156	-30.07	156	-30.07	142676	22	33782	4635
rno-miR-30c-1-3p	circRNA_1133|Chr10:88930821_88952777_+	159	-33.38	159	-33.38	148268	22	1788	874
rno-miR-30c-1-3p	circRNA_1134|Chr10:88933665_88960323_+	159	-33.38	159	-33.38	148269	22	1865	643
rno-miR-30c-1-3p	circRNA_1603|Chr12:41157218_41200958_+	165	-34.16	165	-34.16	148738	22	34891	20204
rno-miR-34a-5p	circRNA_1023|Chr10:66894597_66928143_+	170	-31.27	170	-31.27	170538	22	2885	2691
rno-miR-34a-5p	circRNA_1479|Chr12:9292180_9313769_-	162	-30.15	162	-30.15	170994	22	5933	5450
rno-miR-92a-1-5p	circRNA_0686|Chr1:250726380_250727219_-	166	-30.46	166	-30.46	172439	23	840	473
rno-miR-93-3p	circRNA_1136|Chr10:89036545_89074755_+	176	-34.35	176	-34.35	177365	23	33782	8763
rno-miR-93-3p	circRNA_1211|Chr10:104935806_104999940_+	358	-68.68	179	-34.34	177440	23	61976	33192 54381
rno-miR-93-3p	circRNA_1212|Chr10:104956981_104999940_+	358	-68.68	179	-34.34	177441	23	40801	12017 33206
rno-miR-93-3p	circRNA_1213|Chr10:104980533_104999940_+	179	-34.34	179	-34.34	177442	23	17249	9654
rno-miR-93-3p	circRNA_1347|Chr11:67686321_67697976_-	165	-30.26	165	-30.26	177576	23	5556	761
rno-miR-93-3p	circRNA_1348|Chr11:67686321_67702960_-	165	-30.26	165	-30.26	177577	23	5690	895
rno-miR-93-3p	circRNA_1586|Chr12:39423519_39518315_+	177	-33.19	177	-33.19	177815	23	13530	7451
rno-miR-93-3p	circRNA_1587|Chr12:39497185_39518315_+	177	-33.19	177	-33.19	177816	23	11740	5661
rno-miR-106b-3p	circRNA_0994|Chr10:62623758_62664462_-	169	-30.8	169	-30.8	196246	22	35368	6400
rno-miR-125a-5p	circRNA_1285|Chr11:34462325_34500943_-	153	-30.16	153	-30.16	204370	24	1553	801
rno-miR-125a-5p	circRNA_1286|Chr11:34495233_34500943_-	153	-30.16	153	-30.16	204371	24	1281	801
rno-miR-125a-3p	circRNA_0994|Chr10:62623758_62664462_-	166	-31.27	166	-31.27	205198	22	35368	4748
rno-miR-125a-3p	circRNA_1299|Chr11:35676333_35696807_-	173	-30.14	173	-30.14	205503	22	370	210
rno-miR-125b-2-3p	circRNA_1211|Chr10:104935806_104999940_+	510	-91.41	170	-30.47	208772	22	61976	17177 40743 61564
rno-miR-125b-2-3p	circRNA_1212|Chr10:104956981_104999940_+	340	-60.94	170	-30.47	208773	22	40801	19568 40389
rno-miR-125b-2-3p	circRNA_1213|Chr10:104980533_104999940_+	170	-30.47	170	-30.47	208774	22	17249	16837
rno-miR-133a-3p	circRNA_1658|Chr13:35695199_35719842_-	180	-34.86	180	-34.86	227123	22	1339	320
rno-miR-134-5p	circRNA_0734|Chr1:264001511_264066989_+	170	-32.1	170	-32.1	227318	22	59084	56237
rno-miR-134-5p	circRNA_1181|Chr10:95265354_95268582_-	165	-32.23	165	-32.23	227765	22	1425	158
rno-miR-134-5p	circRNA_1470|Chr12:9218693_9221997_-	162	-33.86	162	-33.86	228054	22	334	290
rno-miR-134-3p	circRNA_1215|Chr10:106108767_106109018_+	160	-30.25	160	-30.25	228918	22	252	117
rno-miR-134-3p	circRNA_1216|Chr10:106108767_106110469_+	160	-30.25	160	-30.25	228919	22	533	117
rno-miR-134-3p	circRNA_1603|Chr12:41157218_41200958_+	340	-60.34	170	-30.17	229306	22	34891	27880 33289
rno-miR-134-3p	circRNA_1652|Chr13:35579716_35608096_-	156	-30.41	156	-30.41	229355	22	28381	4741
rno-miR-134-3p	circRNA_1653|Chr13:35579757_35608096_-	156	-30.41	156	-30.41	229356	22	28340	4741
rno-miR-134-3p	circRNA_1654|Chr13:35585251_35608096_-	156	-30.41	156	-30.41	229357	22	22846	4741
rno-miR-134-3p	circRNA_1655|Chr13:35597462_35608096_-	156	-30.41	156	-30.41	229358	22	10635	4741
rno-miR-138-5p	circRNA_0734|Chr1:264001511_264066989_+	164	-30.13	164	-30.13	236270	23	59084	25399
rno-miR-138-5p	circRNA_1208|Chr10:103586432_103677461_-	175	-35.8	175	-35.8	236744	23	84653	80629
rno-miR-138-5p	circRNA_1209|Chr10:103586432_103677527_-	175	-35.8	175	-35.8	236745	23	84719	80695
rno-miR-138-5p	circRNA_1211|Chr10:104935806_104999940_+	175	-35.8	175	-35.8	236747	23	61976	5037
rno-miR-139-5p	circRNA_0729|Chr1:261384568_261385319_-	166	-31.54	166	-31.54	239622	22	752	540
rno-miR-139-3p	circRNA_0712|Chr1:259396273_259421082_-	151	-31.94	151	-31.94	240724	22	2427	1017
rno-miR-145-5p	circRNA_1476|Chr12:9256476_9313769_-	150	-31.04	150	-31.04	251559	23	17219	8495
rno-miR-150-5p	circRNA_1603|Chr12:41157218_41200958_+	176	-31.61	176	-31.61	256162	22	34891	26748
rno-miR-150-3p	circRNA_1208|Chr10:103586432_103677461_-	159	-30.46	159	-30.46	256886	19	84653	79957
rno-miR-150-3p	circRNA_1209|Chr10:103586432_103677527_-	159	-30.46	159	-30.46	256887	19	84719	80023
rno-miR-150-3p	circRNA_1302|Chr11:36370313_36412645_-	155	-30.36	155	-30.36	256980	19	2974	152
rno-miR-150-3p	circRNA_1433|Chr11:89293785_89332868_-	173	-34.77	173	-34.77	257111	19	2750	372
rno-miR-150-3p	circRNA_1434|Chr11:89293785_89341959_-	173	-34.77	173	-34.77	257112	19	2937	559
rno-miR-150-3p	circRNA_1436|Chr11:89316354_89332868_-	173	-34.77	173	-34.77	257114	19	1164	372
rno-miR-150-3p	circRNA_1437|Chr11:89316354_89341959_-	173	-34.77	173	-34.77	257115	19	1351	559
rno-miR-150-3p	circRNA_1438|Chr11:89328437_89332868_-	173	-34.77	173	-34.77	257116	19	720	372
rno-miR-150-3p	circRNA_1439|Chr11:89328437_89341959_-	173	-34.77	173	-34.77	257117	19	907	559
rno-miR-152-5p	circRNA_1525|Chr12:23194239_23233218_+	173	-33.09	173	-33.09	258322	23	38980	10179
rno-miR-181a-2-3p	circRNA_0727|Chr1:261347528_261350203_+	164	-30.58	164	-30.58	267595	19	487	441
rno-miR-185-5p	circRNA_0994|Chr10:62623758_62664462_-	177	-30.75	177	-30.75	275695	22	35368	2795
rno-miR-185-5p	circRNA_1136|Chr10:89036545_89074755_+	169	-30.32	169	-30.32	275837	22	33782	19974
rno-miR-194-3p	circRNA_0898|Chr10:39357059_39359380_-	163	-30.03	163	-30.03	292384	21	2322	579
rno-miR-194-3p	circRNA_1127|Chr10:86738917_86740781_+	166	-32.19	166	-32.19	292613	21	494	209
rno-miR-194-3p	circRNA_1128|Chr10:86738917_86743558_+	166	-32.19	166	-32.19	292614	21	681	209
rno-miR-194-3p	circRNA_1634|Chr12:51960260_51961629_+	181	-38.33	181	-38.33	293120	21	1370	515
rno-miR-194-3p	circRNA_1635|Chr12:51960260_51963245_+	181	-38.33	181	-38.33	293121	21	1481	515
rno-miR-196a-3p	circRNA_1211|Chr10:104935806_104999940_+	165	-31.98	165	-31.98	297173	22	61976	3256
rno-miR-199a-5p	circRNA_0626|Chr1:233464787_233469856_+	171	-30.73	171	-30.73	297707	23	5070	631
rno-miR-204-3p	circRNA_1211|Chr10:104935806_104999940_+	163	-34.2	163	-34.2	310601	22	61976	22220
rno-miR-204-3p	circRNA_1212|Chr10:104956981_104999940_+	163	-34.2	163	-34.2	310602	22	40801	1045
rno-miR-205	circRNA_0734|Chr1:264001511_264066989_+	166	-31.75	166	-31.75	311243	23	59084	39131
rno-miR-210-5p	circRNA_1233|Chr10:110043769_110090416_-	173	-32.59	173	-32.59	317337	22	4442	2110
rno-miR-210-5p	circRNA_1603|Chr12:41157218_41200958_+	173	-30.65	173	-30.65	317707	22	34891	28963
rno-miR-210-3p	circRNA_0918|Chr10:46824807_46826650_+	170	-30.43	170	-30.43	318141	22	430	21
rno-miR-211-5p	circRNA_0734|Chr1:264001511_264066989_+	173	-30.47	173	-30.47	319076	22	59084	7393
rno-miR-212-5p	circRNA_1233|Chr10:110043769_110090416_-	156	-31.71	156	-31.71	321813	24	4442	408
rno-miR-212-5p	circRNA_1234|Chr10:110060305_110090416_-	156	-31.71	156	-31.71	321814	24	1849	408
rno-miR-212-5p	circRNA_1235|Chr10:110084039_110110561_-	156	-31.71	156	-31.71	321815	24	1462	1175
rno-miR-216a-3p	circRNA_1652|Chr13:35579716_35608096_-	153	-31.07	153	-31.07	328946	22	28381	18528
rno-miR-216a-3p	circRNA_1653|Chr13:35579757_35608096_-	153	-31.07	153	-31.07	328947	22	28340	18528
rno-miR-216a-3p	circRNA_1654|Chr13:35585251_35608096_-	153	-31.07	153	-31.07	328948	22	22846	18528
rno-miR-296-5p	circRNA_0734|Chr1:264001511_264066989_+	346	-71.08	173	-35.54	350408	21	59084	12643 58381
rno-miR-296-5p	circRNA_1625|Chr12:49449153_49467896_+	161	-30.26	161	-30.26	351299	21	4636	233
rno-miR-296-3p	circRNA_0734|Chr1:264001511_264066989_+	166	-31.62	166	-31.62	351527	22	59084	39179
rno-miR-296-3p	circRNA_1160|Chr10:93439729_93471445_+	158	-31.06	158	-31.06	351953	22	815	270
rno-miR-296-3p	circRNA_1161|Chr10:93451477_93471445_+	158	-31.06	158	-31.06	351954	22	605	60
rno-miR-296-3p	circRNA_1453|Chr12:1741488_1743734_-	166	-32.36	166	-32.36	352246	22	2247	1398
rno-miR-297	circRNA_0734|Chr1:264001511_264066989_+	201	-38.24	201	-38.24	352646	23	59084	34924
rno-miR-297	circRNA_0846|Chr10:15577563_15589574_-	193	-31.55	193	-31.55	352758	23	11897	1172
rno-miR-297	circRNA_0994|Chr10:62623758_62664462_-	381	-61.22	193	-31.17	352906	23	35368	18212 18071
rno-miR-297	circRNA_1520|Chr12:19518760_19528878_-	192	-30.82	192	-30.82	353432	23	4182	2031
rno-miR-298-5p	circRNA_0973|Chr10:59316576_59317441_+	167	-35.09	167	-35.09	354004	23	276	182
rno-miR-298-5p	circRNA_1206|Chr10:102189664_102193598_-	158	-31.92	158	-31.92	354237	23	3935	2467
rno-miR-298-5p	circRNA_1208|Chr10:103586432_103677461_-	160	-30.16	160	-30.16	354239	23	84653	14859
rno-miR-298-5p	circRNA_1209|Chr10:103586432_103677527_-	160	-30.16	160	-30.16	354240	23	84719	14925
rno-miR-298-5p	circRNA_1217|Chr10:106264856_106265494_+	158	-30.47	158	-30.47	354248	23	639	57
rno-miR-298-5p	circRNA_1218|Chr10:106673704_106699402_+	175	-32.11	175	-32.11	354249	23	24691	18557
rno-miR-298-5p	circRNA_1220|Chr10:107298273_107302910_-	170	-31.84	170	-31.84	354251	23	1349	889
rno-miR-298-5p	circRNA_1614|Chr12:46807041_46809529_-	167	-30.63	167	-30.63	354645	23	818	752
rno-miR-299a-3p	circRNA_0994|Chr10:62623758_62664462_-	164	-30.23	164	-30.23	357382	21	35368	14341
rno-miR-320-5p	circRNA_0952|Chr10:55971256_55986625_+	167	-31.2	167	-31.2	360697	22	15370	9733
rno-miR-320-5p	circRNA_1208|Chr10:103586432_103677461_-	168	-31.44	168	-31.44	360953	22	84653	15354
rno-miR-320-5p	circRNA_1209|Chr10:103586432_103677527_-	168	-31.44	168	-31.44	360954	22	84719	15420
rno-miR-320-5p	circRNA_1432|Chr11:89175425_89227006_-	160	-30.3	160	-30.3	361177	22	46913	16514
rno-miR-320-5p	circRNA_1447|Chr12:589609_632694_-	167	-32.62	167	-32.62	361192	22	39412	14564
rno-miR-320-5p	circRNA_1579|Chr12:38399702_38439580_+	180	-34.85	180	-34.85	361324	22	4409	2204
rno-miR-320-5p	circRNA_1580|Chr12:38407145_38419763_+	180	-34.85	180	-34.85	361325	22	3173	1142
rno-miR-320-3p	circRNA_0952|Chr10:55971256_55986625_+	171	-31.77	171	-31.77	361816	22	15370	413
rno-miR-320-3p	circRNA_1211|Chr10:104935806_104999940_+	534	-92.91	178	-30.97	362075	22	61976	13963 37531 58720
rno-miR-320-3p	circRNA_1212|Chr10:104956981_104999940_+	356	-61.94	178	-30.97	362076	22	40801	16356 37545
rno-miR-320-3p	circRNA_1213|Chr10:104980533_104999940_+	178	-30.97	178	-30.97	362077	22	17249	13993
rno-miR-449a-5p	circRNA_1479|Chr12:9292180_9313769_-	171	-31.28	171	-31.28	371295	22	5933	5453
rno-miR-383-3p	circRNA_1129|Chr10:88142991_88150584_-	167	-30.53	167	-30.53	386611	21	7005	6053
rno-miR-383-3p	circRNA_1191|Chr10:95814871_95824793_+	176	-32.62	176	-32.62	386673	21	915	33
rno-miR-383-3p	circRNA_1202|Chr10:97023339_97047879_+	160	-31.84	160	-31.84	386684	21	10836	4385
rno-miR-383-3p	circRNA_1211|Chr10:104935806_104999940_+	507	-102.18	169	-34.06	386693	21	61976	12194 35762 56951
rno-miR-383-3p	circRNA_1212|Chr10:104956981_104999940_+	338	-68.12	169	-34.06	386694	21	40801	14587 35776
rno-miR-383-3p	circRNA_1213|Chr10:104980533_104999940_+	169	-34.06	169	-34.06	386695	21	17249	12224
rno-miR-383-3p	circRNA_1525|Chr12:23194239_23233218_+	164	-31.16	164	-31.16	387007	21	38980	29457
rno-miR-383-3p	circRNA_1586|Chr12:39423519_39518315_+	165	-32.72	165	-32.72	387068	21	13530	5962
rno-miR-383-3p	circRNA_1587|Chr12:39497185_39518315_+	165	-32.72	165	-32.72	387069	21	11740	4172
rno-miR-207	circRNA_0760|Chr1:267385920_267397007_+	171	-30.58	171	-30.58	387361	23	2267	2201
rno-miR-207	circRNA_0801|Chr10:1413338_1434359_-	168	-30.5	168	-30.5	387402	23	560	43
rno-miR-207	circRNA_0952|Chr10:55971256_55986625_+	164	-31.66	164	-31.66	387553	23	15370	9751
rno-miR-207	circRNA_1208|Chr10:103586432_103677461_-	175	-34.53	175	-34.53	387809	23	84653	9836
rno-miR-207	circRNA_1209|Chr10:103586432_103677527_-	175	-34.53	175	-34.53	387810	23	84719	9902
rno-miR-207	circRNA_1515|Chr12:16429462_16432717_+	163	-30.83	163	-30.83	388116	23	453	389
rno-miR-207	circRNA_1516|Chr12:16429462_16437555_+	163	-30.83	163	-30.83	388117	23	515	389
rno-miR-207	circRNA_1603|Chr12:41157218_41200958_+	171	-32.3	171	-32.3	388204	23	34891	3243
rno-miR-361-3p	circRNA_0656|Chr1:242327790_242361812_-	158	-30.67	158	-30.67	391733	24	28598	8945
rno-miR-361-3p	circRNA_0734|Chr1:264001511_264066989_+	151	-30.44	151	-30.44	391811	24	59084	10169
rno-miR-361-3p	circRNA_0952|Chr10:55971256_55986625_+	169	-31.94	169	-31.94	392029	24	15370	2727
rno-miR-361-3p	circRNA_0994|Chr10:62623758_62664462_-	160	-31.69	160	-31.69	392071	24	35368	2626
rno-miR-361-3p	circRNA_1447|Chr12:589609_632694_-	169	-30.94	169	-30.94	392524	24	39412	27069
rno-miR-361-3p	circRNA_1586|Chr12:39423519_39518315_+	152	-34.19	152	-34.19	392663	24	13530	12987
rno-miR-361-3p	circRNA_1587|Chr12:39497185_39518315_+	152	-34.19	152	-34.19	392664	24	11740	11197
rno-miR-483-5p	circRNA_0952|Chr10:55971256_55986625_+	178	-31.9	178	-31.9	396505	22	15370	812
rno-miR-483-3p	circRNA_0714|Chr1:259421033_259459540_-	179	-35.78	179	-35.78	397386	22	1142	274
rno-miR-483-3p	circRNA_0715|Chr1:259434763_259488326_-	179	-35.78	179	-35.78	397387	22	2081	1515
rno-miR-483-3p	circRNA_0716|Chr1:259448449_259459540_-	179	-35.78	179	-35.78	397388	22	409	274
rno-miR-483-3p	circRNA_0717|Chr1:259448449_259488326_-	179	-35.78	179	-35.78	397389	22	1650	1515
rno-miR-483-3p	circRNA_0718|Chr1:259448449_259489683_-	179	-35.78	179	-35.78	397390	22	3007	2872
rno-miR-483-3p	circRNA_0719|Chr1:259450673_259488326_-	179	-35.78	179	-35.78	397391	22	1586	1515
rno-miR-483-3p	circRNA_0938|Chr10:48452001_48484868_+	161	-30.22	161	-30.22	397610	22	14722	5519
rno-miR-483-3p	circRNA_1211|Chr10:104935806_104999940_+	160	-30.48	160	-30.48	397883	22	61976	20926
rno-miR-483-3p	circRNA_1414|Chr11:85618881_85633288_+	167	-33.13	167	-33.13	398086	22	14408	2796
rno-miR-370-5p	circRNA_1485|Chr12:9764074_9764541_+	176	-30.72	176	-30.72	399276	24	468	426
rno-miR-370-3p	circRNA_0724|Chr1:260774582_260791888_+	159	-34.16	159	-34.16	399634	22	17307	13773
rno-miR-370-3p	circRNA_0941|Chr10:48749746_48753281_-	155	-30.51	155	-30.51	399851	22	315	158
rno-miR-370-3p	circRNA_0948|Chr10:54421637_54430758_-	159	-32.55	159	-32.55	399858	22	982	344
rno-miR-370-3p	circRNA_1039|Chr10:67601993_67620604_+	163	-30.24	163	-30.24	399949	22	5819	5540
rno-miR-370-3p	circRNA_1206|Chr10:102189664_102193598_-	161	-32.14	161	-32.14	400116	22	3935	3198
rno-miR-370-3p	circRNA_1218|Chr10:106673704_106699402_+	166	-32.95	166	-32.95	400128	22	24691	17605
rno-miR-370-3p	circRNA_1222|Chr10:108544870_108551552_+	160	-30.88	160	-30.88	400132	22	1820	128
rno-miR-370-3p	circRNA_1285|Chr11:34462325_34500943_-	160	-31.67	160	-31.67	400195	22	1553	635
rno-miR-370-3p	circRNA_1286|Chr11:34495233_34500943_-	160	-31.67	160	-31.67	400196	22	1281	635
rno-miR-370-3p	circRNA_1419|Chr11:87574249_87577497_-	162	-30.73	162	-30.73	400329	22	716	52
rno-miR-370-3p	circRNA_1420|Chr11:87574249_87591013_-	162	-30.73	162	-30.73	400330	22	1011	347
rno-miR-370-3p	circRNA_1497|Chr12:13519926_13528791_+	160	-32.28	160	-32.28	400407	22	1154	860
rno-miR-370-3p	circRNA_1498|Chr12:13524227_13527329_+	160	-32.28	160	-32.28	400408	22	941	724
rno-miR-370-3p	circRNA_1603|Chr12:41157218_41200958_+	172	-30.38	172	-30.38	400513	22	34891	10669
rno-miR-370-3p	circRNA_1692|Chr13:49778831_49798965_-	184	-37.25	184	-37.25	400602	22	15073	12034
rno-miR-412-3p	circRNA_0734|Chr1:264001511_264066989_+	173	-36.88	173	-36.88	404120	22	59084	26078
rno-miR-133b-3p	circRNA_1658|Chr13:35695199_35719842_-	180	-32.46	180	-32.46	409520	22	1339	320
rno-miR-540-3p	circRNA_0870|Chr10:29318809_29326665_+	171	-32.8	171	-32.8	410970	22	7857	6641
rno-miR-540-3p	circRNA_0938|Chr10:48452001_48484868_+	171	-30.09	171	-30.09	411038	22	14722	9735
rno-miR-540-3p	circRNA_1208|Chr10:103586432_103677461_-	164	-33.59	164	-33.59	411308	22	84653	67015
rno-miR-540-3p	circRNA_1209|Chr10:103586432_103677527_-	164	-33.59	164	-33.59	411309	22	84719	67081
rno-miR-540-3p	circRNA_1603|Chr12:41157218_41200958_+	178	-38.7	178	-38.7	411703	22	34891	21539
rno-miR-540-3p	circRNA_1604|Chr12:41233006_41239549_+	170	-32.85	170	-32.85	411704	22	3056	460
rno-miR-540-3p	circRNA_1625|Chr12:49449153_49467896_+	163	-30.95	163	-30.95	411725	22	4636	4195
rno-miR-540-3p	circRNA_1652|Chr13:35579716_35608096_-	171	-30.51	171	-30.51	411752	22	28381	20905
rno-miR-540-3p	circRNA_1653|Chr13:35579757_35608096_-	171	-30.51	171	-30.51	411753	22	28340	20905
rno-miR-540-3p	circRNA_1654|Chr13:35585251_35608096_-	171	-30.51	171	-30.51	411754	22	22846	20905
rno-miR-493-3p	circRNA_1021|Chr10:66806816_66822005_+	179	-30.18	179	-30.18	422311	21	6053	2798
rno-miR-485-5p	circRNA_1585|Chr12:39423519_39432256_+	184	-31.74	184	-31.74	441898	22	773	93
rno-miR-485-5p	circRNA_1586|Chr12:39423519_39518315_+	184	-31.74	184	-31.74	441899	22	13530	93
rno-miR-20b-3p	circRNA_0807|Chr10:3191467_3204962_+	158	-30.05	158	-30.05	453429	22	663	315
rno-miR-20b-3p	circRNA_0808|Chr10:3195923_3207076_+	158	-30.05	158	-30.05	453430	22	679	146
rno-miR-20b-3p	circRNA_1139|Chr10:89402919_89409533_-	172	-30.01	172	-30.01	453761	22	494	163
rno-miR-20b-3p	circRNA_1634|Chr12:51960260_51961629_+	169	-32.25	169	-32.25	454256	22	1370	239
rno-miR-20b-3p	circRNA_1635|Chr12:51960260_51963245_+	169	-32.25	169	-32.25	454257	22	1481	239
rno-miR-20b-3p	circRNA_1670|Chr13:42572179_42616611_-	176	-31.49	176	-31.49	454292	22	10802	10399
rno-miR-378a-5p	circRNA_0939|Chr10:48452001_48528848_+	162	-30.87	162	-30.87	456918	22	763	677
rno-miR-378a-5p	circRNA_0940|Chr10:48465317_48528848_+	162	-30.87	162	-30.87	456919	22	434	348
rno-miR-378a-5p	circRNA_0952|Chr10:55971256_55986625_+	169	-31.64	169	-31.64	456931	22	15370	14400
rno-miR-378a-5p	circRNA_1342|Chr11:64704113_64708610_+	165	-33.85	165	-33.85	457321	22	890	171
rno-miR-378a-5p	circRNA_1476|Chr12:9256476_9313769_-	166	-31.65	166	-31.65	457455	22	17219	15493
rno-miR-378a-5p	circRNA_1603|Chr12:41157218_41200958_+	163	-33.77	163	-33.77	457582	22	34891	4018
rno-miR-378a-3p	circRNA_1339|Chr11:62059611_62067655_-	179	-33.02	179	-33.02	458437	21	501	236
rno-miR-664-2-5p	circRNA_1520|Chr12:19518760_19528878_-	161	-30.38	161	-30.38	466451	21	4182	2982
rno-miR-497-5p	circRNA_1528|Chr12:23962947_23980429_+	173	-32.85	173	-32.85	467578	22	1031	968
rno-miR-497-3p	circRNA_0938|Chr10:48452001_48484868_+	176	-30.1	176	-30.1	468107	23	14722	9580
rno-miR-466b-5p	circRNA_1013|Chr10:65011337_65013622_-	188	-33.2	188	-33.2	469301	22	2286	240
rno-miR-466b-5p	circRNA_1211|Chr10:104935806_104999940_+	338	-60.52	169	-30.26	469499	22	61976	28735 50613
rno-miR-466b-5p	circRNA_1212|Chr10:104956981_104999940_+	338	-60.52	169	-30.26	469500	22	40801	7560 29438
rno-miR-466b-5p	circRNA_1213|Chr10:104980533_104999940_+	169	-30.26	169	-30.26	469501	22	17249	5886
rno-miR-466b-5p	circRNA_1520|Chr12:19518760_19528878_-	186	-31.63	186	-31.63	469808	22	4182	1829
rno-miR-466b-5p	circRNA_1652|Chr13:35579716_35608096_-	187	-31.05	187	-31.05	469940	22	28381	11301
rno-miR-466b-5p	circRNA_1653|Chr13:35579757_35608096_-	187	-31.05	187	-31.05	469941	22	28340	11301
rno-miR-466b-5p	circRNA_1654|Chr13:35585251_35608096_-	187	-31.05	187	-31.05	469942	22	22846	11301
rno-miR-466b-5p	circRNA_1672|Chr13:42737103_42746062_-	169	-30.25	169	-30.25	469960	22	8960	5462
rno-miR-466b-3p	circRNA_0724|Chr1:260774582_260791888_+	196	-37.76	196	-37.76	470131	22	17307	926
rno-miR-466b-3p	circRNA_0734|Chr1:264001511_264066989_+	188	-31.42	188	-31.42	470141	22	59084	10875
rno-miR-466b-3p	circRNA_0782|Chr1:278731694_278773472_+	195	-31.38	195	-31.38	470189	22	23784	23436
rno-miR-466b-3p	circRNA_1136|Chr10:89036545_89074755_+	392	-75.52	196	-37.76	470543	22	33782	7448 7568
rno-miR-466b-3p	circRNA_1432|Chr11:89175425_89227006_-	196	-37.76	196	-37.76	470839	22	46913	6548
rno-miR-466b-3p	circRNA_1447|Chr12:589609_632694_-	196	-36.03	196	-36.03	470854	22	39412	4557
rno-miR-466b-2-3p	circRNA_0724|Chr1:260774582_260791888_+	191	-33.02	191	-33.02	471250	21	17307	929
rno-miR-466b-2-3p	circRNA_1136|Chr10:89036545_89074755_+	382	-66.04	191	-33.02	471662	21	33782	7451 7571
rno-miR-466b-2-3p	circRNA_1447|Chr12:589609_632694_-	191	-33.02	191	-33.02	471973	21	39412	4560
rno-miR-874-5p	circRNA_1211|Chr10:104935806_104999940_+	308	-65.64	154	-32.82	481808	21	61976	19627 43192
rno-miR-874-5p	circRNA_1212|Chr10:104956981_104999940_+	154	-32.82	154	-32.82	481809	21	40801	22017
rno-miR-874-5p	circRNA_1500|Chr12:13879069_13884323_+	163	-31.92	163	-31.92	482097	21	531	443
rno-miR-874-5p	circRNA_1652|Chr13:35579716_35608096_-	166	-30.26	166	-30.26	482249	21	28381	11726
rno-miR-874-5p	circRNA_1653|Chr13:35579757_35608096_-	166	-30.26	166	-30.26	482250	21	28340	11726
rno-miR-874-5p	circRNA_1654|Chr13:35585251_35608096_-	166	-30.26	166	-30.26	482251	21	22846	11726
rno-miR-874-3p	circRNA_0626|Chr1:233464787_233469856_+	156	-31.13	156	-31.13	482342	22	5070	1934
rno-miR-874-3p	circRNA_0734|Chr1:264001511_264066989_+	156	-30.2	156	-30.2	482450	22	59084	49188
rno-miR-874-3p	circRNA_0813|Chr10:4583896_4592469_+	166	-31.75	166	-31.75	482529	22	445	160
rno-miR-874-3p	circRNA_0814|Chr10:4583896_4605111_+	166	-31.75	166	-31.75	482530	22	539	160
rno-miR-874-3p	circRNA_0938|Chr10:48452001_48484868_+	165	-30.27	165	-30.27	482654	22	14722	2232
rno-miR-874-3p	circRNA_1136|Chr10:89036545_89074755_+	152	-32.6	152	-32.6	482852	22	33782	1254
rno-miR-874-3p	circRNA_1181|Chr10:95265354_95268582_-	175	-45.61	175	-45.61	482897	22	1425	82
rno-miR-874-3p	circRNA_1208|Chr10:103586432_103677461_-	165	-33.14	165	-33.14	482924	22	84653	42815
rno-miR-874-3p	circRNA_1209|Chr10:103586432_103677527_-	165	-33.14	165	-33.14	482925	22	84719	42881
rno-miR-874-3p	circRNA_1211|Chr10:104935806_104999940_+	963	-194.89	170	-33.17	482927	22	61976	17478 41044 22043 23704 45617 906
rno-miR-874-3p	circRNA_1212|Chr10:104956981_104999940_+	638	-130.64	170	-33.17	482928	22	40801	19869 868 2529 24442
rno-miR-874-3p	circRNA_1213|Chr10:104980533_104999940_+	156	-32.49	156	-32.49	482929	22	17249	890
rno-miR-874-3p	circRNA_1484|Chr12:9309987_9324674_-	157	-35.96	157	-35.96	483200	22	11165	8347
rno-miR-874-3p	circRNA_1512|Chr12:16032935_16040005_+	160	-33.56	160	-33.56	483228	22	429	206
rno-miR-874-3p	circRNA_1513|Chr12:16035366_16040005_+	160	-33.56	160	-33.56	483229	22	381	158
rno-miR-874-3p	circRNA_1603|Chr12:41157218_41200958_+	167	-36.18	167	-36.18	483319	22	34891	13666
rno-miR-874-3p	circRNA_1634|Chr12:51960260_51961629_+	172	-36.81	172	-36.81	483350	22	1370	446
rno-miR-874-3p	circRNA_1635|Chr12:51960260_51963245_+	172	-36.81	172	-36.81	483351	22	1481	446
rno-miR-877	circRNA_1239|Chr10:110505762_110508344_+	164	-30.37	164	-30.37	484074	20	664	173
rno-miR-877	circRNA_1240|Chr10:110505762_110509297_+	164	-30.37	164	-30.37	484075	20	874	173
rno-miR-188-5p	circRNA_1208|Chr10:103586432_103677461_-	173	-33.39	173	-33.39	500828	21	84653	76323
rno-miR-188-5p	circRNA_1209|Chr10:103586432_103677527_-	173	-33.39	173	-33.39	500829	21	84719	76389
rno-miR-188-5p	circRNA_1661|Chr13:35752165_35783307_-	183	-30.35	183	-30.35	501281	21	362	193
rno-miR-188-5p	circRNA_1662|Chr13:35769419_35784163_-	183	-30.35	183	-30.35	501282	21	396	291
rno-miR-188-3p	circRNA_0868|Chr10:28685026_28733700_+	158	-30.44	158	-30.44	501607	20	1023	524
rno-miR-423-5p	circRNA_0834|Chr10:13931236_13933066_+	168	-31.12	168	-31.12	520596	24	1170	985
rno-miR-423-5p	circRNA_0835|Chr10:13931236_13935484_+	168	-31.12	168	-31.12	520597	24	1631	985
rno-miR-423-5p	circRNA_0986|Chr10:61882916_61897730_+	170	-32.94	170	-32.94	520748	24	488	431
rno-miR-423-5p	circRNA_1056|Chr10:71515700_71519615_+	175	-33.55	175	-33.55	520818	24	3916	1200
rno-miR-423-5p	circRNA_1603|Chr12:41157218_41200958_+	170	-31.54	170	-31.54	521365	24	34891	6870
rno-miR-423-3p	circRNA_0665|Chr1:244629853_244728217_+	164	-32.89	164	-32.89	521546	23	4086	3563
rno-miR-423-3p	circRNA_0757|Chr1:266201079_266206952_+	159	-31.02	159	-31.02	521638	23	568	539
rno-miR-423-3p	circRNA_1153|Chr10:92406311_92432295_-	180	-34.55	180	-34.55	522034	23	623	18
rno-miR-423-3p	circRNA_1155|Chr10:92424212_92432295_-	180	-34.55	180	-34.55	522036	23	8084	18
rno-miR-484	circRNA_0898|Chr10:39357059_39359380_-	158	-30.66	158	-30.66	534088	22	2322	2121
rno-miR-532-3p	circRNA_0656|Chr1:242327790_242361812_-	152	-31.22	152	-31.22	539441	22	28598	3704
rno-miR-532-3p	circRNA_0734|Chr1:264001511_264066989_+	320	-62.08	169	-31.4	539519	22	59084	50972 46926
rno-miR-532-3p	circRNA_1208|Chr10:103586432_103677461_-	315	-63.42	158	-32.77	539993	22	84653	22527 15504
rno-miR-532-3p	circRNA_1209|Chr10:103586432_103677527_-	315	-63.42	158	-32.77	539994	22	84719	22593 15570
rno-miR-532-3p	circRNA_1525|Chr12:23194239_23233218_+	162	-31.77	162	-31.77	540310	22	38980	12762
rno-miR-532-3p	circRNA_1603|Chr12:41157218_41200958_+	155	-34.96	155	-34.96	540388	22	34891	19191
rno-miR-673-5p	circRNA_1208|Chr10:103586432_103677461_-	150	-35.13	150	-35.13	546707	22	84653	84431
rno-miR-673-5p	circRNA_1209|Chr10:103586432_103677527_-	150	-35.13	150	-35.13	546708	22	84719	84497
rno-miR-673-5p	circRNA_1652|Chr13:35579716_35608096_-	184	-41.31	184	-41.31	547151	22	28381	18279
rno-miR-673-5p	circRNA_1653|Chr13:35579757_35608096_-	184	-41.31	184	-41.31	547152	22	28340	18279
rno-miR-673-5p	circRNA_1654|Chr13:35585251_35608096_-	184	-41.31	184	-41.31	547153	22	22846	18279
rno-miR-673-3p	circRNA_1490|Chr12:10527308_10545048_-	152	-30.53	152	-30.53	548108	22	10942	8234
rno-miR-674-3p	circRNA_0734|Chr1:264001511_264066989_+	165	-30.78	165	-30.78	549590	22	59084	59062
rno-miR-742-3p	circRNA_1340|Chr11:62164346_62172354_-	173	-31.56	173	-31.56	554672	22	8009	983
rno-miR-760-5p	circRNA_0782|Chr1:278731694_278773472_+	158	-33.68	158	-33.68	559709	22	23784	10701
rno-miR-760-5p	circRNA_0994|Chr10:62623758_62664462_-	173	-41.86	173	-41.86	559921	22	35368	3740
rno-miR-760-5p	circRNA_1063|Chr10:72203091_72212356_+	158	-31.76	158	-31.76	559990	22	805	735
rno-miR-760-5p	circRNA_1064|Chr10:72203091_72212546_+	158	-31.76	158	-31.76	559991	22	882	735
rno-miR-760-5p	circRNA_1525|Chr12:23194239_23233218_+	332	-61.54	166	-30.77	560452	22	38980	5841 6361
rno-miR-760-5p	circRNA_1549|Chr12:25226326_25234184_+	166	-35.48	166	-35.48	560476	22	708	603
rno-miR-760-5p	circRNA_1692|Chr13:49778831_49798965_-	311	-64.51	160	-32.29	560619	22	15073	8600 1899
rno-miR-760-3p	circRNA_0650|Chr1:241963278_241964424_-	152	-30.73	152	-30.73	560696	20	320	82
rno-miR-760-3p	circRNA_1116|Chr10:86175962_86180040_+	161	-32.28	161	-32.28	561162	20	488	111
rno-miR-760-3p	circRNA_1117|Chr10:86175962_86184480_+	161	-32.28	161	-32.28	561163	20	678	111
rno-miR-760-3p	circRNA_1118|Chr10:86175962_86189991_+	161	-32.28	161	-32.28	561164	20	837	111
rno-miR-760-3p	circRNA_1119|Chr10:86175962_86195240_+	161	-32.28	161	-32.28	561165	20	915	111
rno-miR-760-3p	circRNA_1175|Chr10:94723925_94741510_-	159	-30.4	159	-30.4	561221	20	1036	717
rno-miR-760-3p	circRNA_1208|Chr10:103586432_103677461_-	161	-30.31	161	-30.31	561254	20	84653	8273
rno-miR-760-3p	circRNA_1209|Chr10:103586432_103677527_-	161	-30.31	161	-30.31	561255	20	84719	8339
rno-miR-760-3p	circRNA_1432|Chr11:89175425_89227006_-	156	-31.15	156	-31.15	561478	20	46913	9556
rno-miR-760-3p	circRNA_1447|Chr12:589609_632694_-	169	-30.67	169	-30.67	561493	20	39412	34918
rno-miR-760-3p	circRNA_1685|Chr13:44907813_44937796_+	169	-30.04	169	-30.04	561731	20	999	472
rno-miR-770-5p	circRNA_1652|Chr13:35579716_35608096_-	165	-31.58	165	-31.58	562817	22	28381	6191
rno-miR-770-5p	circRNA_1653|Chr13:35579757_35608096_-	165	-31.58	165	-31.58	562818	22	28340	6191
rno-miR-770-5p	circRNA_1654|Chr13:35585251_35608096_-	165	-31.58	165	-31.58	562819	22	22846	6191
rno-miR-770-5p	circRNA_1655|Chr13:35597462_35608096_-	165	-31.58	165	-31.58	562820	22	10635	6191
rno-miR-770-5p	circRNA_1675|Chr13:43811969_43845203_+	160	-30.45	160	-30.45	562840	22	9566	5673
rno-miR-873-3p	circRNA_1525|Chr12:23194239_23233218_+	173	-30.25	173	-30.25	566047	21	38980	10367
rno-miR-92b-5p	circRNA_1113|Chr10:85664537_85672493_-	160	-30.82	160	-30.82	566754	24	495	6
rno-miR-92b-5p	circRNA_1208|Chr10:103586432_103677461_-	174	-32.79	174	-32.79	566849	24	84653	8249
rno-miR-92b-5p	circRNA_1209|Chr10:103586432_103677527_-	174	-32.79	174	-32.79	566850	24	84719	8315
rno-miR-92b-5p	circRNA_1614|Chr12:46807041_46809529_-	170	-30.53	170	-30.53	567255	24	818	663
rno-miR-652-5p	circRNA_0994|Chr10:62623758_62664462_-	170	-32.09	170	-32.09	571111	23	35368	4372
rno-miR-652-5p	circRNA_1069|Chr10:72365735_72371838_-	167	-30.99	167	-30.99	571186	23	428	31
rno-miR-652-5p	circRNA_1071|Chr10:72369079_72371838_-	167	-30.99	167	-30.99	571188	23	325	31
rno-miR-652-5p	circRNA_1072|Chr10:72371335_72380358_-	167	-30.99	167	-30.99	571189	23	419	271
rno-miR-146b-3p	circRNA_1210|Chr10:104622040_104624774_-	164	-30.04	164	-30.04	574684	21	219	127
rno-miR-490-3p	circRNA_1211|Chr10:104935806_104999940_+	374	-65.96	187	-32.98	581399	22	61976	32575 53765
rno-miR-490-3p	circRNA_1212|Chr10:104956981_104999940_+	374	-65.96	187	-32.98	581400	22	40801	11400 32590
rno-miR-490-3p	circRNA_1213|Chr10:104980533_104999940_+	187	-32.98	187	-32.98	581401	22	17249	9038
rno-miR-490-3p	circRNA_1397|Chr11:80977209_80981424_-	165	-31.62	165	-31.62	581585	22	860	415
rno-miR-1224	circRNA_1202|Chr10:97023339_97047879_+	164	-30.49	164	-30.49	583628	21	10836	6343
rno-miR-1224	circRNA_1208|Chr10:103586432_103677461_-	166	-32.9	166	-32.9	583634	21	84653	66674
rno-miR-1224	circRNA_1209|Chr10:103586432_103677527_-	166	-32.9	166	-32.9	583635	21	84719	66740
rno-miR-1224	circRNA_1211|Chr10:104935806_104999940_+	159	-30.85	159	-30.85	583637	21	61976	1792
rno-miR-1224	circRNA_1603|Chr12:41157218_41200958_+	174	-32.76	174	-32.76	584029	21	34891	23334
rno-miR-504	circRNA_0994|Chr10:62623758_62664462_-	153	-30.2	153	-30.2	589015	22	35368	9886
rno-miR-504	circRNA_1208|Chr10:103586432_103677461_-	160	-30.23	160	-30.23	589229	22	84653	21118
rno-miR-504	circRNA_1209|Chr10:103586432_103677527_-	160	-30.23	160	-30.23	589230	22	84719	21184
rno-miR-504	circRNA_1239|Chr10:110505762_110508344_+	177	-32.3	177	-32.3	589260	22	664	356
rno-miR-504	circRNA_1240|Chr10:110505762_110509297_+	177	-32.3	177	-32.3	589261	22	874	356
rno-miR-504	circRNA_1605|Chr12:41465578_41466994_+	170	-34.16	170	-34.16	589626	22	397	58
rno-miR-615	circRNA_0903|Chr10:43485293_43494367_+	315	-65.42	163	-33.16	596757	22	1472	975 957
rno-miR-615	circRNA_1092|Chr10:75495818_75496428_+	162	-30.89	162	-30.89	596946	22	611	194
rno-miR-615	circRNA_1603|Chr12:41157218_41200958_+	175	-36.16	175	-36.16	597457	22	34891	7967
rno-miR-615	circRNA_1615|Chr12:47084346_47092139_-	159	-31.61	159	-31.61	597469	22	479	261
rno-miR-615	circRNA_1616|Chr12:47088804_47092139_-	159	-31.61	159	-31.61	597470	22	372	261
rno-miR-615	circRNA_1624|Chr12:48835825_48837529_-	171	-39.06	171	-39.06	597478	22	297	241
rno-miR-668	circRNA_0994|Chr10:62623758_62664462_-	162	-34.86	162	-34.86	602443	24	35368	7671
rno-miR-675-5p	circRNA_1039|Chr10:67601993_67620604_+	163	-30.16	163	-30.16	605845	22	5819	1447
rno-miR-665	circRNA_0834|Chr10:13931236_13933066_+	174	-30.37	174	-30.37	610116	22	1170	27
rno-miR-665	circRNA_0835|Chr10:13931236_13935484_+	174	-30.37	174	-30.37	610117	22	1631	27
rno-miR-665	circRNA_1129|Chr10:88142991_88150584_-	162	-34.28	162	-34.28	610411	22	7005	834
rno-miR-665	circRNA_1179|Chr10:95038675_95044344_-	174	-31.3	174	-31.3	610461	22	459	28
rno-miR-665	circRNA_1466|Chr12:9061581_9062262_+	155	-31.91	155	-31.91	610748	22	324	96
rno-miR-665	circRNA_1511|Chr12:15980239_15981325_-	174	-32.46	174	-32.46	610793	22	476	445
rno-miR-665	circRNA_1603|Chr12:41157218_41200958_+	170	-30.08	170	-30.08	610885	22	34891	7730
rno-miR-935	circRNA_1394|Chr11:79742322_79778947_-	157	-30.12	157	-30.12	611795	23	21793	923
rno-miR-667-5p	circRNA_0729|Chr1:261384568_261385319_-	170	-30.8	170	-30.8	624558	24	752	668
rno-miR-667-5p	circRNA_0919|Chr10:47810268_47831888_-	177	-33.79	177	-33.79	624748	24	1605	1007
rno-miR-667-5p	circRNA_0934|Chr10:48418262_48419844_+	168	-34.2	168	-34.2	624763	24	1583	982
rno-miR-667-5p	circRNA_1208|Chr10:103586432_103677461_-	164	-32.86	164	-32.86	625037	24	84653	83719
rno-miR-667-5p	circRNA_1209|Chr10:103586432_103677527_-	164	-32.86	164	-32.86	625038	24	84719	83785
rno-miR-667-5p	circRNA_1211|Chr10:104935806_104999940_+	492	-98.58	164	-32.86	625040	24	61976	29561 30611 51439
rno-miR-667-5p	circRNA_1212|Chr10:104956981_104999940_+	492	-98.58	164	-32.86	625041	24	40801	8386 9436 30264
rno-miR-667-5p	circRNA_1213|Chr10:104980533_104999940_+	164	-32.86	164	-32.86	625042	24	17249	6712
rno-miR-667-5p	circRNA_1271|Chr11:31787922_31788551_-	165	-30.12	165	-30.12	625100	24	405	205
rno-miR-667-5p	circRNA_1447|Chr12:589609_632694_-	173	-30.83	173	-30.83	625276	24	39412	34556
rno-miR-667-3p	circRNA_1211|Chr10:104935806_104999940_+	176	-37.73	176	-37.73	626159	22	61976	44486
rno-miR-667-3p	circRNA_1212|Chr10:104956981_104999940_+	176	-37.73	176	-37.73	626160	22	40801	23311
rno-miR-667-3p	circRNA_1525|Chr12:23194239_23233218_+	167	-31.61	167	-31.61	626473	22	38980	19530
rno-miR-667-3p	circRNA_1543|Chr12:25001615_25008446_+	163	-30.53	163	-30.53	626491	22	660	347
rno-miR-667-3p	circRNA_1544|Chr12:25005292_25007716_+	163	-30.53	163	-30.53	626492	22	474	212
rno-miR-667-3p	circRNA_1545|Chr12:25006504_25007109_+	163	-30.53	163	-30.53	626493	22	234	62
rno-miR-667-3p	circRNA_1578|Chr12:38305355_38317018_+	168	-31.08	168	-31.08	626526	22	521	364
rno-miR-764-3p	circRNA_1548|Chr12:25207283_25210634_+	165	-31.26	165	-31.26	629853	23	641	283
rno-miR-666-5p	circRNA_0734|Chr1:264001511_264066989_+	166	-30.92	166	-30.92	630158	20	59084	38960
rno-miR-666-5p	circRNA_1136|Chr10:89036545_89074755_+	173	-34.58	173	-34.58	630560	20	33782	24280
rno-miR-666-5p	circRNA_1621|Chr12:47445850_47451149_-	165	-31.3	165	-31.3	631045	20	840	251
rno-miR-666-3p	circRNA_0734|Chr1:264001511_264066989_+	157	-30.21	157	-30.21	631277	23	59084	48541
rno-miR-666-3p	circRNA_0994|Chr10:62623758_62664462_-	166	-30.17	166	-30.17	631537	23	35368	1359
rno-miR-666-3p	circRNA_1594|Chr12:40382285_40382424_+	163	-33.5	163	-33.5	632137	23	140	7
rno-miR-678	circRNA_1220|Chr10:107298273_107302910_-	150	-31.47	150	-31.47	634001	22	1349	123
rno-miR-678	circRNA_1239|Chr10:110505762_110508344_+	150	-30.4	150	-30.4	634020	22	664	239
rno-miR-678	circRNA_1240|Chr10:110505762_110509297_+	150	-30.4	150	-30.4	634021	22	874	239
rno-miR-678	circRNA_1692|Chr13:49778831_49798965_-	163	-31.93	163	-31.93	634473	22	15073	11256
rno-miR-711	circRNA_0938|Chr10:48452001_48484868_+	163	-30.67	163	-30.67	634838	22	14722	3640
rno-miR-711	circRNA_1104|Chr10:82894925_82900142_+	167	-30.67	167	-30.67	635004	22	5218	2322
rno-miR-3541	circRNA_0782|Chr1:278731694_278773472_+	155	-30.86	155	-30.86	638039	18	23784	9885
rno-miR-3541	circRNA_0846|Chr10:15577563_15589574_-	159	-31.76	159	-31.76	638103	18	11897	8958
rno-miR-3541	circRNA_0911|Chr10:46031966_46055516_+	161	-31.12	161	-31.12	638168	18	21821	4878
rno-miR-3541	circRNA_0994|Chr10:62623758_62664462_-	163	-31.81	163	-31.81	638251	18	35368	14090
rno-miR-3541	circRNA_1208|Chr10:103586432_103677461_-	322	-63.96	163	-32.19	638465	18	84653	1052 2680
rno-miR-3541	circRNA_1209|Chr10:103586432_103677527_-	322	-63.96	163	-32.19	638466	18	84719	1118 2746
rno-miR-3541	circRNA_1586|Chr12:39423519_39518315_+	154	-30.4	154	-30.4	638843	18	13530	4486
rno-miR-3541	circRNA_1587|Chr12:39497185_39518315_+	154	-30.4	154	-30.4	638844	18	11740	2696
rno-miR-3541	circRNA_1692|Chr13:49778831_49798965_-	163	-32.53	163	-32.53	638949	18	15073	10799
rno-miR-3543	circRNA_1208|Chr10:103586432_103677461_-	172	-32.91	172	-32.91	640703	23	84653	83654
rno-miR-3543	circRNA_1209|Chr10:103586432_103677527_-	172	-32.91	172	-32.91	640704	23	84719	83720
rno-miR-3543	circRNA_1211|Chr10:104935806_104999940_+	172	-32.91	172	-32.91	640706	23	61976	30546
rno-miR-3543	circRNA_1212|Chr10:104956981_104999940_+	172	-32.91	172	-32.91	640707	23	40801	9371
rno-miR-3544	circRNA_1476|Chr12:9256476_9313769_-	163	-31.42	163	-31.42	642090	23	17219	5873
rno-miR-3544	circRNA_1525|Chr12:23194239_23233218_+	152	-31.48	152	-31.48	642139	23	38980	6557
rno-miR-3547	circRNA_0734|Chr1:264001511_264066989_+	162	-33.28	162	-33.28	645824	23	59084	43291
rno-miR-3547	circRNA_1155|Chr10:92424212_92432295_-	174	-31.5	174	-31.5	646245	23	8084	7599
rno-miR-3547	circRNA_1535|Chr12:24505864_24511621_-	151	-30.84	151	-30.84	646625	23	5758	3418
rno-miR-449c-5p	circRNA_1479|Chr12:9292180_9313769_-	158	-30.59	158	-30.59	647688	21	5933	5454
rno-miR-3085	circRNA_0597|Chr1:222763689_222775140_+	170	-33.53	170	-33.53	649044	21	804	384
rno-miR-3085	circRNA_0598|Chr1:222770362_222773712_+	170	-33.53	170	-33.53	649045	21	306	25
rno-miR-3085	circRNA_1468|Chr12:9165634_9177290_+	163	-35.89	163	-35.89	649915	21	441	238
rno-miR-3085	circRNA_1469|Chr12:9175557_9177290_+	163	-33.11	163	-33.11	649916	21	203	1
rno-miR-3085	circRNA_1628|Chr12:51494918_51495425_-	171	-32.32	171	-32.32	650075	21	508	383
rno-miR-3548	circRNA_1191|Chr10:95814871_95824793_+	170	-36.14	170	-36.14	650757	22	915	30
rno-miR-3548	circRNA_1202|Chr10:97023339_97047879_+	340	-60.14	170	-30.07	650768	22	10836	1918 2195
rno-miR-3550	circRNA_1221|Chr10:108486117_108494849_+	162	-34.3	162	-34.3	653025	21	3577	1579
rno-miR-3552	circRNA_1397|Chr11:80977209_80981424_-	168	-30.32	168	-30.32	658796	21	860	93
rno-miR-3553	circRNA_1211|Chr10:104935806_104999940_+	171	-30.86	171	-30.86	659729	23	61976	1261
rno-miR-3557-3p	circRNA_0911|Chr10:46031966_46055516_+	171	-30.55	171	-30.55	666143	22	21821	19765
rno-miR-3557-3p	circRNA_1408|Chr11:84619089_84638229_-	162	-30.85	162	-30.85	666640	22	6327	3463
rno-miR-3557-3p	circRNA_1410|Chr11:84623876_84638229_-	162	-30.85	162	-30.85	666642	22	5830	3463
rno-miR-3557-3p	circRNA_1412|Chr11:84632585_84638229_-	162	-30.85	162	-30.85	666644	22	5645	3463
rno-miR-3557-3p	circRNA_1652|Chr13:35579716_35608096_-	171	-30.85	171	-30.85	666884	22	28381	8651
rno-miR-3557-3p	circRNA_1653|Chr13:35579757_35608096_-	171	-30.85	171	-30.85	666885	22	28340	8651
rno-miR-3557-3p	circRNA_1654|Chr13:35585251_35608096_-	171	-30.85	171	-30.85	666886	22	22846	8651
rno-miR-3557-3p	circRNA_1655|Chr13:35597462_35608096_-	171	-30.85	171	-30.85	666887	22	10635	8651
rno-miR-3561-5p	circRNA_0994|Chr10:62623758_62664462_-	169	-34.36	169	-34.36	677416	21	35368	13516
rno-miR-3562	circRNA_0734|Chr1:264001511_264066989_+	336	-63.79	173	-32.17	679394	22	59084	48818 29508
rno-miR-3562	circRNA_0776|Chr1:278580846_278656479_+	169	-32.28	169	-32.28	679436	22	2741	2683
rno-miR-3562	circRNA_0777|Chr1:278580846_278661960_+	169	-32.28	169	-32.28	679437	22	2879	2683
rno-miR-3562	circRNA_0778|Chr1:278656261_278731755_+	169	-32.28	169	-32.28	679438	22	898	161
rno-miR-3562	circRNA_0782|Chr1:278731694_278773472_+	184	-36.84	184	-36.84	679442	22	23784	10243
rno-miR-3562	circRNA_0911|Chr10:46031966_46055516_+	172	-34.56	172	-34.56	679571	22	21821	1622
rno-miR-3562	circRNA_0952|Chr10:55971256_55986625_+	161	-31.19	161	-31.19	679612	22	15370	12771
rno-miR-3562	circRNA_0969|Chr10:58961407_58965487_-	159	-30.06	159	-30.06	679629	22	854	158
rno-miR-3562	circRNA_1132|Chr10:88410710_88419957_-	170	-35.29	170	-35.29	679792	22	692	225
rno-miR-3562	circRNA_1218|Chr10:106673704_106699402_+	153	-32.34	153	-32.34	679878	22	24691	15262
rno-miR-3562	circRNA_1508|Chr12:14728661_14730279_-	155	-30.93	155	-30.93	680168	22	303	29
rno-miR-3562	circRNA_1509|Chr12:15075273_15098764_-	162	-32.69	162	-32.69	680169	22	415	341
rno-miR-3562	circRNA_1603|Chr12:41157218_41200958_+	166	-33.18	166	-33.18	680263	22	34891	14288
rno-miR-3562	circRNA_1670|Chr13:42572179_42616611_-	172	-34.87	172	-34.87	680330	22	10802	9625
rno-miR-3562	circRNA_1692|Chr13:49778831_49798965_-	160	-31.26	160	-31.26	680352	22	15073	8310
rno-miR-3065-3p	circRNA_1543|Chr12:25001615_25008446_+	156	-31.75	156	-31.75	689155	24	660	540
rno-miR-3065-3p	circRNA_1544|Chr12:25005292_25007716_+	156	-31.75	156	-31.75	689156	24	474	405
rno-miR-3065-3p	circRNA_1603|Chr12:41157218_41200958_+	155	-32.56	155	-32.56	689215	24	34891	8591
rno-miR-3569	circRNA_1086|Chr10:73952261_73985026_-	167	-30.01	167	-30.01	697650	21	740	378
rno-miR-3569	circRNA_1087|Chr10:73980841_73985026_-	167	-30.01	167	-30.01	697651	21	440	378
rno-miR-3569	circRNA_1133|Chr10:88930821_88952777_+	158	-30.44	158	-30.44	697697	21	1788	1081
rno-miR-3569	circRNA_1134|Chr10:88933665_88960323_+	158	-30.44	158	-30.44	697698	21	1865	850
rno-miR-3569	circRNA_1394|Chr11:79742322_79778947_-	152	-30.3	152	-30.3	697958	21	21793	2718
rno-miR-1188-5p	circRNA_1136|Chr10:89036545_89074755_+	329	-62.79	165	-31.52	703295	21	33782	16535 8878
rno-miR-1188-5p	circRNA_1211|Chr10:104935806_104999940_+	167	-32.04	167	-32.04	703370	21	61976	52052
rno-miR-1188-5p	circRNA_1212|Chr10:104956981_104999940_+	167	-32.04	167	-32.04	703371	21	40801	30877
rno-miR-1188-5p	circRNA_1213|Chr10:104980533_104999940_+	167	-32.04	167	-32.04	703372	21	17249	7325
rno-miR-3573-5p	circRNA_0734|Chr1:264001511_264066989_+	156	-30.01	156	-30.01	705131	22	59084	13921
rno-miR-3573-5p	circRNA_0986|Chr10:61882916_61897730_+	161	-30.15	161	-30.15	705383	22	488	435
rno-miR-3573-5p	circRNA_1603|Chr12:41157218_41200958_+	175	-32.68	175	-32.68	706000	22	34891	6872
rno-miR-3573-5p	circRNA_1672|Chr13:42737103_42746062_-	151	-30.27	151	-30.27	706069	22	8960	3423
rno-miR-3573-5p	circRNA_1675|Chr13:43811969_43845203_+	172	-30.17	172	-30.17	706072	22	9566	1544
rno-miR-3577	circRNA_0656|Chr1:242327790_242361812_-	154	-33.22	154	-33.22	712886	21	28598	2289
rno-miR-3577	circRNA_0938|Chr10:48452001_48484868_+	161	-30.1	161	-30.1	713168	21	14722	5658
rno-miR-3577	circRNA_1141|Chr10:89653117_89657127_+	166	-30.97	166	-30.97	713371	21	781	418
rno-miR-409b	circRNA_0734|Chr1:264001511_264066989_+	177	-31.9	177	-31.9	720797	23	59084	38929
rno-miR-133c	circRNA_0994|Chr10:62623758_62664462_-	172	-33.15	172	-33.15	723295	21	35368	20428
rno-miR-133c	circRNA_1061|Chr10:72203091_72209962_+	164	-31.42	164	-31.42	723362	21	535	79
rno-miR-133c	circRNA_1062|Chr10:72203091_72211698_+	164	-31.42	164	-31.42	723363	21	708	79
rno-miR-133c	circRNA_1063|Chr10:72203091_72212356_+	164	-31.42	164	-31.42	723364	21	805	79
rno-miR-133c	circRNA_1064|Chr10:72203091_72212546_+	164	-31.42	164	-31.42	723365	21	882	79
rno-miR-3583-3p	circRNA_1168|Chr10:94292693_94299122_+	170	-30.31	170	-30.31	725707	22	6430	1451
rno-miR-3583-3p	circRNA_1525|Chr12:23194239_23233218_+	178	-30.05	178	-30.05	726064	22	38980	28126
rno-miR-3583-3p	circRNA_1603|Chr12:41157218_41200958_+	174	-34.27	174	-34.27	726142	22	34891	26220
rno-miR-3584-5p	circRNA_0865|Chr10:20676704_20708388_-	170	-31.79	170	-31.79	726523	18	1705	414
rno-miR-3584-5p	circRNA_1039|Chr10:67601993_67620604_+	151	-32.22	151	-32.22	726697	18	5819	2926
rno-miR-3584-5p	circRNA_1208|Chr10:103586432_103677461_-	154	-32.9	154	-32.9	726866	18	84653	57753
rno-miR-3584-5p	circRNA_1209|Chr10:103586432_103677527_-	154	-32.9	154	-32.9	726867	18	84719	57819
rno-miR-3584-5p	circRNA_1324|Chr11:53511143_53519258_-	159	-30.05	159	-30.05	726982	18	4451	1227
rno-miR-3584-5p	circRNA_1462|Chr12:5680684_5693522_-	180	-42.28	180	-42.28	727120	18	640	264
rno-miR-3584-5p	circRNA_1485|Chr12:9764074_9764541_+	163	-35.06	163	-35.06	727143	18	468	98
rno-miR-3585-3p	circRNA_1208|Chr10:103586432_103677461_-	173	-34.51	173	-34.51	731342	19	84653	34103
rno-miR-3585-3p	circRNA_1209|Chr10:103586432_103677527_-	173	-34.51	173	-34.51	731343	19	84719	34169
rno-miR-702-3p	circRNA_0656|Chr1:242327790_242361812_-	165	-37.29	165	-37.29	737504	23	28598	26432
rno-miR-702-3p	circRNA_0730|Chr1:262786087_262811422_-	159	-33.99	159	-33.99	737578	23	25336	4199
rno-miR-702-3p	circRNA_0734|Chr1:264001511_264066989_+	159	-31.51	159	-31.51	737582	23	59084	30726
rno-miR-702-3p	circRNA_1129|Chr10:88142991_88150584_-	159	-31.87	159	-31.87	737977	23	7005	5546
rno-miR-702-3p	circRNA_1133|Chr10:88930821_88952777_+	166	-31.83	166	-31.83	737981	23	1788	1693
rno-miR-702-3p	circRNA_1134|Chr10:88933665_88960323_+	166	-31.83	166	-31.83	737982	23	1865	1462
rno-miR-702-3p	circRNA_1208|Chr10:103586432_103677461_-	167	-30.28	167	-30.28	738056	23	84653	11452
rno-miR-702-3p	circRNA_1209|Chr10:103586432_103677527_-	167	-30.28	167	-30.28	738057	23	84719	11518
rno-miR-702-3p	circRNA_1211|Chr10:104935806_104999940_+	158	-30.25	158	-30.25	738059	23	61976	39935
rno-miR-702-3p	circRNA_1212|Chr10:104956981_104999940_+	158	-30.25	158	-30.25	738060	23	40801	18760
rno-miR-702-3p	circRNA_1342|Chr11:64704113_64708610_+	164	-30.52	164	-30.52	738190	23	890	211
rno-miR-702-3p	circRNA_1447|Chr12:589609_632694_-	164	-33.36	164	-33.36	738295	23	39412	33814
rno-miR-3593-5p	circRNA_0734|Chr1:264001511_264066989_+	166	-30.12	166	-30.12	749891	22	59084	41662
rno-miR-3593-5p	circRNA_1133|Chr10:88930821_88952777_+	167	-32.05	167	-32.05	750290	22	1788	1607
rno-miR-3593-5p	circRNA_1134|Chr10:88933665_88960323_+	167	-32.05	167	-32.05	750291	22	1865	1376
rno-miR-3593-5p	circRNA_1208|Chr10:103586432_103677461_-	175	-31.05	175	-31.05	750365	22	84653	56588
rno-miR-3593-5p	circRNA_1209|Chr10:103586432_103677527_-	175	-31.05	175	-31.05	750366	22	84719	56654
rno-miR-3593-5p	circRNA_1218|Chr10:106673704_106699402_+	159	-32.44	159	-32.44	750375	22	24691	17446
rno-miR-3593-5p	circRNA_1447|Chr12:589609_632694_-	165	-32.57	165	-32.57	750604	22	39412	17684
rno-miR-3593-5p	circRNA_1606|Chr12:41550130_41552380_+	158	-30.16	158	-30.16	750763	22	400	103
rno-miR-3594-5p	circRNA_0734|Chr1:264001511_264066989_+	160	-31.65	160	-31.65	752129	21	59084	4098
rno-miR-3594-5p	circRNA_1208|Chr10:103586432_103677461_-	660	-129.02	172	-35.69	752603	21	84653	48881 80597 68062 25635
rno-miR-3594-5p	circRNA_1209|Chr10:103586432_103677527_-	660	-129.02	172	-35.69	752604	21	84719	48947 80663 68128 25701
rno-miR-3594-5p	circRNA_1249|Chr11:3130814_3142832_+	168	-30.18	168	-30.18	752644	21	814	623
rno-miR-3594-5p	circRNA_1250|Chr11:3130982_3142832_+	168	-30.18	168	-30.18	752645	21	646	455
rno-miR-3594-5p	circRNA_1251|Chr11:3142305_3142832_+	168	-30.18	168	-30.18	752646	21	528	337
rno-miR-3594-5p	circRNA_1652|Chr13:35579716_35608096_-	162	-30.62	162	-30.62	753047	21	28381	11795
rno-miR-3594-5p	circRNA_1653|Chr13:35579757_35608096_-	162	-30.62	162	-30.62	753048	21	28340	11795
rno-miR-3594-5p	circRNA_1654|Chr13:35585251_35608096_-	162	-30.62	162	-30.62	753049	21	22846	11795
rno-miR-328b-3p	circRNA_1490|Chr12:10527308_10545048_-	163	-30.19	163	-30.19	759599	18	10942	3858
rno-miR-1199-5p	circRNA_0952|Chr10:55971256_55986625_+	166	-30.24	166	-30.24	760180	20	15370	14409
rno-miR-1199-5p	circRNA_1690|Chr13:49210804_49211192_+	173	-34.68	173	-34.68	760918	20	389	203
rno-miR-1199-3p	circRNA_1445|Chr12:587083_591296_-	153	-31.59	153	-31.59	761792	21	1782	413
rno-miR-1199-3p	circRNA_1446|Chr12:589609_591296_-	153	-31.59	153	-31.59	761793	21	1688	413
rno-miR-1199-3p	circRNA_1447|Chr12:589609_632694_-	153	-31.59	153	-31.59	761794	21	39412	38137
rno-miR-1199-3p	circRNA_1526|Chr12:23962944_23968609_+	172	-35.63	172	-35.63	761873	21	335	255
rno-miR-1199-3p	circRNA_1527|Chr12:23962947_23975065_+	172	-35.63	172	-35.63	761874	21	674	252
rno-miR-1199-3p	circRNA_1528|Chr12:23962947_23980429_+	172	-35.63	172	-35.63	761875	21	1031	252
rno-miR-1306-5p	circRNA_0734|Chr1:264001511_264066989_+	152	-30.32	152	-30.32	771152	22	59084	30726
rno-miR-1306-5p	circRNA_0956|Chr10:57327447_57328855_+	161	-33.63	161	-33.63	771374	22	445	369
rno-miR-1306-5p	circRNA_1136|Chr10:89036545_89074755_+	158	-32.71	158	-32.71	771554	22	33782	27313
rno-miR-1306-5p	circRNA_1147|Chr10:90949093_90975559_-	163	-31.21	163	-31.21	771565	22	12137	8875
rno-miR-1306-5p	circRNA_1211|Chr10:104935806_104999940_+	151	-34.33	151	-34.33	771629	22	61976	44481
rno-miR-1306-5p	circRNA_1212|Chr10:104956981_104999940_+	151	-34.33	151	-34.33	771630	22	40801	23306
rno-miR-1306-5p	circRNA_1221|Chr10:108486117_108494849_+	165	-30.88	165	-30.88	771639	22	3577	3103
rno-miR-1306-5p	circRNA_1230|Chr10:109754888_109755050_+	155	-32.43	155	-32.43	771648	22	163	81
rno-miR-1306-5p	circRNA_1231|Chr10:109754906_109755050_+	155	-32.43	155	-32.43	771649	22	145	63
rno-miR-1306-5p	circRNA_1394|Chr11:79742322_79778947_-	351	-66.82	177	-33.76	771812	22	21793	1558 11326
rno-miR-1306-5p	circRNA_1525|Chr12:23194239_23233218_+	160	-33.06	160	-33.06	771943	22	38980	35191
rno-miR-3473	circRNA_0734|Chr1:264001511_264066989_+	173	-30.87	173	-30.87	773390	22	59084	20631
rno-miR-3473	circRNA_1208|Chr10:103586432_103677461_-	163	-30.07	163	-30.07	773864	22	84653	16048
rno-miR-3473	circRNA_1209|Chr10:103586432_103677527_-	163	-30.07	163	-30.07	773865	22	84719	16114
rno-miR-3473	circRNA_1535|Chr12:24505864_24511621_-	200	-47.42	200	-47.42	774191	22	5758	1722
rno-miR-3099	circRNA_0994|Chr10:62623758_62664462_-	175	-33.2	175	-33.2	779245	22	35368	3321
rno-miR-3099	circRNA_1260|Chr11:24479964_24556418_-	180	-31.11	180	-31.11	779511	22	6998	5579
rno-miR-3099	circRNA_1287|Chr11:34600704_34624408_+	168	-31.11	168	-31.11	779538	22	15684	13099
rno-miR-344i	circRNA_0734|Chr1:264001511_264066989_+	171	-30.13	171	-30.13	780104	22	59084	41378
rno-miR-344i	circRNA_1211|Chr10:104935806_104999940_+	525	-92.55	175	-30.85	780581	22	61976	16109 39674 60866
rno-miR-344i	circRNA_1212|Chr10:104956981_104999940_+	350	-61.7	175	-30.85	780582	22	40801	18499 39691
rno-miR-344i	circRNA_1213|Chr10:104980533_104999940_+	175	-30.85	175	-30.85	780583	22	17249	16139
rno-miR-344i	circRNA_1287|Chr11:34600704_34624408_+	174	-33.05	174	-33.05	780657	22	15684	7494
rno-miR-6315	circRNA_0656|Chr1:242327790_242361812_-	164	-39.41	164	-39.41	781145	23	28598	24952
rno-miR-6315	circRNA_0734|Chr1:264001511_264066989_+	168	-31.65	168	-31.65	781223	23	59084	29004
rno-miR-6315	circRNA_0835|Chr10:13931236_13935484_+	166	-33.56	166	-33.56	781324	23	1631	1568
rno-miR-6315	circRNA_0911|Chr10:46031966_46055516_+	173	-35.26	173	-35.26	781400	23	21821	5231
rno-miR-6315	circRNA_1032|Chr10:67497682_67526564_+	330	-65.44	173	-34.75	781521	23	1041	835 973
rno-miR-6315	circRNA_1147|Chr10:90949093_90975559_-	180	-34.89	180	-34.89	781636	23	12137	1201
rno-miR-6315	circRNA_1197|Chr10:96672236_96692754_+	164	-39.41	164	-39.41	781686	23	13689	8227
rno-miR-6315	circRNA_1211|Chr10:104935806_104999940_+	322	-63.44	161	-31.72	781700	23	61976	33309 54498
rno-miR-6315	circRNA_1212|Chr10:104956981_104999940_+	322	-63.44	161	-31.72	781701	23	40801	12134 33323
rno-miR-6315	circRNA_1213|Chr10:104980533_104999940_+	161	-31.72	161	-31.72	781702	23	17249	9771
rno-miR-6315	circRNA_1414|Chr11:85618881_85633288_+	164	-39.41	164	-39.41	781903	23	14408	8815
rno-miR-6315	circRNA_1535|Chr12:24505864_24511621_-	161	-31.47	161	-31.47	782024	23	5758	4716
rno-miR-6315	circRNA_1603|Chr12:41157218_41200958_+	159	-33.3	159	-33.3	782092	23	34891	16235
rno-miR-6315	circRNA_1647|Chr13:32453777_32469550_-	160	-34.49	160	-34.49	782136	23	15774	11434
rno-miR-6315	circRNA_1692|Chr13:49778831_49798965_-	176	-31.81	176	-31.81	782181	23	15073	10888
rno-miR-3102	circRNA_1414|Chr11:85618881_85633288_+	172	-35.43	172	-35.43	783022	21	14408	1597
rno-miR-344g	circRNA_0792|Chr1:282490425_282498880_-	169	-30.74	169	-30.74	783519	22	8255	1253
rno-miR-344g	circRNA_0994|Chr10:62623758_62664462_-	170	-31.02	170	-31.02	783721	22	35368	10668
rno-miR-344g	circRNA_1525|Chr12:23194239_23233218_+	164	-30.83	164	-30.83	784252	22	38980	15068
rno-miR-344g	circRNA_1604|Chr12:41233006_41239549_+	165	-30.2	165	-30.2	784331	22	3056	2409
rno-miR-6316	circRNA_1218|Chr10:106673704_106699402_+	173	-30.88	173	-30.88	785064	23	24691	6575
rno-miR-6316	circRNA_1652|Chr13:35579716_35608096_-	185	-31.49	185	-31.49	785498	23	28381	26905
rno-miR-6316	circRNA_1653|Chr13:35579757_35608096_-	185	-31.49	185	-31.49	785499	23	28340	26905
rno-miR-6318	circRNA_0734|Chr1:264001511_264066989_+	315	-62.37	161	-32.01	786818	22	59084	49084 40523
rno-miR-6318	circRNA_0953|Chr10:56055168_56065456_-	161	-32.38	161	-32.38	787037	22	1938	726
rno-miR-6318	circRNA_1147|Chr10:90949093_90975559_-	158	-30.06	158	-30.06	787231	22	12137	9475
rno-miR-6318	circRNA_1340|Chr11:62164346_62172354_-	166	-31.34	166	-31.34	787424	22	8009	3033
rno-miR-6318	circRNA_1455|Chr12:1975318_1977031_+	157	-32.01	157	-32.01	787539	22	377	81
rno-miR-6318	circRNA_1456|Chr12:1975318_1979802_+	157	-32.01	157	-32.01	787540	22	495	81
rno-miR-6318	circRNA_1525|Chr12:23194239_23233218_+	157	-32.58	157	-32.58	787609	22	38980	38120
rno-miR-6319	circRNA_1447|Chr12:589609_632694_-	165	-31.47	165	-31.47	788650	21	39412	18953
rno-miR-3075	circRNA_0729|Chr1:261384568_261385319_-	168	-30.42	168	-30.42	789051	24	752	142
rno-miR-3075	circRNA_0904|Chr10:43503195_43504147_+	157	-30.29	157	-30.29	789226	24	953	615
rno-miR-3075	circRNA_1484|Chr12:9309987_9324674_-	170	-30.08	170	-30.08	789806	24	11165	5795
rno-miR-3075	circRNA_1599|Chr12:40737033_40746487_-	163	-31.2	163	-31.2	789921	24	955	705
rno-miR-3075	circRNA_1670|Chr13:42572179_42616611_-	176	-32.49	176	-32.49	789992	24	10802	4054
rno-miR-6321	circRNA_0740|Chr1:265188834_265212301_+	184	-32.45	184	-32.45	791300	23	9517	5358
rno-miR-6323	circRNA_0742|Chr1:265511409_265524404_-	161	-30.04	161	-30.04	794659	25	1419	530
rno-miR-6323	circRNA_0743|Chr1:265514723_265528610_-	161	-30.04	161	-30.04	794660	25	1703	974
rno-miR-6323	circRNA_0744|Chr1:265515390_265524404_-	161	-30.04	161	-30.04	794661	25	1066	530
rno-miR-6323	circRNA_0745|Chr1:265518157_265524404_-	161	-30.04	161	-30.04	794662	25	980	530
rno-miR-6323	circRNA_1136|Chr10:89036545_89074755_+	181	-34.3	181	-34.3	795053	25	33782	2217
rno-miR-6323	circRNA_1414|Chr11:85618881_85633288_+	179	-30.52	179	-30.52	795331	25	14408	169
rno-miR-6323	circRNA_1522|Chr12:22397614_22401050_-	177	-33.65	177	-33.65	795439	25	614	87
rno-miR-6323	circRNA_1523|Chr12:22400803_22402784_-	177	-33.65	177	-33.65	795440	25	530	369
rno-miR-6326	circRNA_1525|Chr12:23194239_23233218_+	170	-32.13	170	-32.13	798799	23	38980	9820
rno-miR-6328	circRNA_1142|Chr10:89658158_89677892_+	165	-31.14	165	-31.14	800654	21	2074	595
rno-miR-3072	circRNA_0782|Chr1:278731694_278773472_+	150	-33.35	150	-33.35	804770	23	23784	9888
rno-miR-3072	circRNA_0967|Chr10:58342533_58353726_+	161	-31.43	161	-31.43	804955	23	1106	718
rno-miR-3072	circRNA_1152|Chr10:92406311_92424322_-	155	-30.01	155	-30.01	805140	23	12222	9066
rno-miR-3072	circRNA_1208|Chr10:103586432_103677461_-	163	-30.92	163	-30.92	805196	23	84653	42145
rno-miR-3072	circRNA_1209|Chr10:103586432_103677527_-	163	-30.92	163	-30.92	805197	23	84719	42211
rno-miR-3072	circRNA_1394|Chr11:79742322_79778947_-	326	-66.49	169	-33.36	805382	23	21793	3790 5170
rno-miR-3072	circRNA_1603|Chr12:41157218_41200958_+	157	-30.43	157	-30.43	805591	23	34891	17184
rno-miR-3072	circRNA_1692|Chr13:49778831_49798965_-	154	-33.65	154	-33.65	805680	23	15073	8599
rno-miR-6332	circRNA_1603|Chr12:41157218_41200958_+	171	-32.1	171	-32.1	807829	23	34891	20323
rno-miR-6333	circRNA_0730|Chr1:262786087_262811422_-	175	-30.78	175	-30.78	808075	23	25336	16881
rno-miR-6333	circRNA_0734|Chr1:264001511_264066989_+	176	-31.48	176	-31.48	808079	23	59084	38017
rno-miR-6333	circRNA_0938|Chr10:48452001_48484868_+	176	-31.45	176	-31.45	808283	23	14722	14492
rno-miR-6333	circRNA_1136|Chr10:89036545_89074755_+	172	-30.82	172	-30.82	808481	23	33782	31055
rno-miR-6333	circRNA_1211|Chr10:104935806_104999940_+	172	-31.19	172	-31.19	808556	23	61976	5434
rno-miR-6333	circRNA_1603|Chr12:41157218_41200958_+	180	-30.13	180	-30.13	808948	23	34891	33835
rno-miR-6334	circRNA_1016|Chr10:65065614_65066693_-	165	-33.89	165	-33.89	809480	22	1080	168
rno-miR-6334	circRNA_1136|Chr10:89036545_89074755_+	156	-30.63	156	-30.63	809600	22	33782	25805
rno-miR-6334	circRNA_1208|Chr10:103586432_103677461_-	156	-30.55	156	-30.55	809672	22	84653	65077
rno-miR-6334	circRNA_1209|Chr10:103586432_103677527_-	156	-30.55	156	-30.55	809673	22	84719	65143
rno-miR-6334	circRNA_1272|Chr11:31943121_31946043_+	154	-33.26	154	-33.26	809736	22	217	44
rno-miR-6334	circRNA_1273|Chr11:31943121_31955266_+	154	-33.26	154	-33.26	809737	22	378	44
rno-miR-6334	circRNA_1294|Chr11:34668091_34722272_+	162	-30.76	162	-30.76	809758	22	1533	1059
rno-miR-6334	circRNA_1333|Chr11:60646739_60672590_-	162	-31.58	162	-31.58	809797	22	4081	964
rno-miR-6334	circRNA_1394|Chr11:79742322_79778947_-	171	-33.62	171	-33.62	809858	22	21793	7940
rno-miR-6334	circRNA_1525|Chr12:23194239_23233218_+	160	-32.35	160	-32.35	809989	22	38980	30009
rno-miR-6334	circRNA_1586|Chr12:39423519_39518315_+	170	-30.42	170	-30.42	810050	22	13530	6196
rno-miR-6334	circRNA_1587|Chr12:39497185_39518315_+	170	-30.42	170	-30.42	810051	22	11740	4406
rno-miR-7578	circRNA_1211|Chr10:104935806_104999940_+	171	-31.24	171	-31.24	810794	23	61976	21915
rno-miR-7578	circRNA_1212|Chr10:104956981_104999940_+	171	-31.24	171	-31.24	810795	23	40801	740
rno-miR-7578	circRNA_1385|Chr11:73151999_73179042_+	169	-30.14	169	-30.14	810968	23	1306	1060
rno-miR-1247-5p	circRNA_1208|Chr10:103586432_103677461_-	156	-33.05	156	-33.05	816386	22	84653	69723
rno-miR-1247-5p	circRNA_1209|Chr10:103586432_103677527_-	156	-33.05	156	-33.05	816387	22	84719	69789
rno-miR-149-5p	circRNA_0600|Chr1:225019523_225021984_+	156	-30.94	156	-30.94	821373	23	860	728
rno-miR-149-5p	circRNA_0734|Chr1:264001511_264066989_+	155	-30.59	155	-30.59	821507	23	59084	54326
rno-miR-149-5p	circRNA_1124|Chr10:86222510_86235225_+	169	-30.06	169	-30.06	821897	23	440	366
rno-miR-149-5p	circRNA_1208|Chr10:103586432_103677461_-	161	-30.2	161	-30.2	821981	23	84653	1135
rno-miR-149-5p	circRNA_1209|Chr10:103586432_103677527_-	161	-30.2	161	-30.2	821982	23	84719	1201
rno-miR-149-5p	circRNA_1598|Chr12:40521512_40523581_+	169	-34.52	169	-34.52	822371	23	269	218
rno-miR-149-5p	circRNA_1692|Chr13:49778831_49798965_-	154	-30.27	154	-30.27	822465	23	15073	8619
rno-miR-149-3p	circRNA_1113|Chr10:85664537_85672493_-	164	-34.62	164	-34.62	823005	18	495	12
rno-miR-149-3p	circRNA_1208|Chr10:103586432_103677461_-	158	-32.64	158	-32.64	823100	18	84653	8253
rno-miR-149-3p	circRNA_1209|Chr10:103586432_103677527_-	158	-32.64	158	-32.64	823101	18	84719	8319
rno-miR-149-3p	circRNA_1621|Chr12:47445850_47451149_-	160	-36.22	160	-36.22	823513	18	840	807
rno-miR-1956-5p	circRNA_1142|Chr10:89658158_89677892_+	161	-31.43	161	-31.43	831986	22	2074	2023
rno-miR-1956-5p	circRNA_1636|Chr12:51981500_51997274_+	172	-32.83	172	-32.83	832480	22	1009	91
rno-miR-1956-3p	circRNA_1335|Chr11:61121301_61122547_+	163	-30.56	163	-30.56	833298	18	456	423
rno-miR-5132-5p	circRNA_0734|Chr1:264001511_264066989_+	172	-30.02	172	-30.02	846125	22	59084	26736
rno-miR-5132-5p	circRNA_1032|Chr10:67497682_67526564_+	157	-30.43	157	-30.43	846423	22	1041	782
rno-miR-5132-5p	circRNA_1603|Chr12:41157218_41200958_+	166	-32.4	166	-32.4	846994	22	34891	14949
rno-miR-5132-3p	circRNA_1432|Chr11:89175425_89227006_-	161	-33.54	161	-33.54	847942	23	46913	3471
rno-miR-762	circRNA_0622|Chr1:231400387_231401771_-	159	-30.11	159	-30.11	848251	18	498	405
rno-miR-762	circRNA_1614|Chr12:46807041_46809529_-	153	-30.29	153	-30.29	849243	18	818	665
rno-miR-466b-4-3p	circRNA_0724|Chr1:260774582_260791888_+	191	-33.02	191	-33.02	849472	21	17307	929
rno-miR-466b-4-3p	circRNA_1136|Chr10:89036545_89074755_+	382	-66.04	191	-33.02	849884	21	33782	7451 7571
rno-miR-466b-4-3p	circRNA_1447|Chr12:589609_632694_-	191	-33.02	191	-33.02	850195	21	39412	4560
rno-miR-676	circRNA_1603|Chr12:41157218_41200958_+	157	-30.07	157	-30.07	852589	22	34891	13670
rno-miR-676	circRNA_1650|Chr13:34515329_34524101_+	166	-31.03	166	-31.03	852636	22	604	9
rno-miR-676	circRNA_1651|Chr13:34515329_34528874_+	166	-31.03	166	-31.03	852637	22	827	9
rno-miR-486	circRNA_1218|Chr10:106673704_106699402_+	172	-30.93	172	-30.93	853323	22	24691	13388
rno-miR-486	circRNA_1603|Chr12:41157218_41200958_+	171	-33.7	171	-33.7	853708	22	34891	1495
rno-miR-709	circRNA_0734|Chr1:264001511_264066989_+	335	-67.64	168	-35.8	853958	19	59084	36182 31163
rno-miR-709	circRNA_0819|Chr10:5100271_5130612_-	163	-32.14	163	-32.14	854043	19	813	190
rno-miR-709	circRNA_0833|Chr10:13746860_13750448_+	167	-31.8	167	-31.8	854057	19	672	598
rno-miR-709	circRNA_0870|Chr10:29318809_29326665_+	318	-63.51	163	-32.8	854094	19	7857	3085 4396
rno-miR-709	circRNA_0994|Chr10:62623758_62664462_-	168	-31.84	168	-31.84	854218	19	35368	19685
rno-miR-709	circRNA_1056|Chr10:71515700_71519615_+	173	-31.85	173	-31.85	854280	19	3916	2473
rno-miR-709	circRNA_1136|Chr10:89036545_89074755_+	334	-62.94	169	-32.05	854360	19	33782	26654 10292
rno-miR-709	circRNA_1152|Chr10:92406311_92424322_-	165	-31.77	165	-31.77	854376	19	12222	4501
rno-miR-709	circRNA_1155|Chr10:92424212_92432295_-	177	-34.88	177	-34.88	854379	19	8084	4818
rno-miR-709	circRNA_1206|Chr10:102189664_102193598_-	166	-30.55	166	-30.55	854430	19	3935	2053
rno-miR-709	circRNA_1208|Chr10:103586432_103677461_-	169	-32.52	169	-32.52	854432	19	84653	30745
rno-miR-709	circRNA_1209|Chr10:103586432_103677527_-	169	-32.52	169	-32.52	854433	19	84719	30811
rno-miR-709	circRNA_1211|Chr10:104935806_104999940_+	1380	-275.01	177	-37.81	854435	19	61976	22702 24362 46275 33627 54816 3571 26390 48268
rno-miR-709	circRNA_1212|Chr10:104956981_104999940_+	1211	-242.39	177	-37.81	854436	19	40801	1527 3187 25100 12452 33641 5215 27093
rno-miR-709	circRNA_1213|Chr10:104980533_104999940_+	517	-102.29	177	-37.81	854437	19	17249	1548 10089 3541
rno-miR-709	circRNA_1218|Chr10:106673704_106699402_+	169	-32.62	169	-32.62	854442	19	24691	7488
rno-miR-709	circRNA_1324|Chr11:53511143_53519258_-	336	-68.8	168	-34.4	854548	19	4451	1199 1213
rno-miR-709	circRNA_1432|Chr11:89175425_89227006_-	336	-63.15	170	-32.6	854656	19	46913	24579 40501
rno-miR-709	circRNA_1453|Chr12:1741488_1743734_-	165	-30.97	165	-30.97	854677	19	2247	1467
rno-miR-709	circRNA_1652|Chr13:35579716_35608096_-	176	-36.56	176	-36.56	854876	19	28381	2322
rno-miR-709	circRNA_1653|Chr13:35579757_35608096_-	176	-36.56	176	-36.56	854877	19	28340	2322
rno-miR-709	circRNA_1654|Chr13:35585251_35608096_-	176	-36.56	176	-36.56	854878	19	22846	2322
rno-miR-709	circRNA_1655|Chr13:35597462_35608096_-	176	-36.56	176	-36.56	854879	19	10635	2322
rno-miR-323-5p	circRNA_2310|Chr15:52169510_52171878_-	168	-31.95	168	-31.95	2282	22	593	160
rno-miR-324-5p	circRNA_2496|Chr16:32457520_32480855_+	173	-30.2	173	-30.2	5796	23	23336	2623
rno-miR-324-3p	circRNA_1806|Chr13:89336922_89423597_-	161	-34.96	161	-34.96	5938	22	80143	41020
rno-miR-324-3p	circRNA_1815|Chr13:95012881_95030583_+	161	-33.41	161	-33.41	5947	22	17703	11405
rno-miR-324-3p	circRNA_1900|Chr14:5870915_5943886_+	176	-38.62	176	-38.62	6032	22	72972	8091
rno-miR-324-3p	circRNA_1901|Chr14:5871986_5944415_+	176	-38.62	176	-38.62	6033	22	72430	7020
rno-miR-324-3p	circRNA_1902|Chr14:5990330_6026568_+	168	-32.65	168	-32.65	6034	22	15249	10523
rno-miR-324-3p	circRNA_1997|Chr14:41901823_41945264_-	162	-30.64	162	-30.64	6129	22	43442	22769
rno-miR-324-3p	circRNA_2013|Chr14:43400193_43430679_+	156	-31.53	156	-31.53	6145	22	21062	13487
rno-miR-324-3p	circRNA_2014|Chr14:43400193_43461320_+	156	-31.53	156	-31.53	6146	22	21337	13487
rno-miR-324-3p	circRNA_2244|Chr15:33082403_33083206_+	158	-32.64	158	-32.64	6376	22	524	340
rno-miR-324-3p	circRNA_2246|Chr15:33610716_33637119_-	159	-34.76	159	-34.76	6378	22	25030	13015
rno-miR-324-3p	circRNA_2247|Chr15:33616829_33642831_-	159	-34.76	159	-34.76	6379	22	20738	14836
rno-miR-324-3p	circRNA_2248|Chr15:33617554_33645321_-	159	-34.76	159	-34.76	6380	22	20250	15073
rno-miR-324-3p	circRNA_2272|Chr15:39680680_39703475_-	172	-32.76	172	-32.76	6404	22	14031	1406
rno-miR-324-3p	circRNA_2298|Chr15:48645462_48650261_-	163	-31.86	163	-31.86	6430	22	1215	751
rno-miR-324-3p	circRNA_2340|Chr15:56885591_56913746_-	154	-32.6	154	-32.6	6472	22	28156	20701
rno-miR-326-5p	circRNA_1975|Chr14:35102267_35117990_-	153	-30.93	153	-30.93	8603	20	1170	324
rno-miR-326-3p	circRNA_1787|Chr13:83616629_83660292_-	160	-34.49	160	-34.49	9247	21	1512	996
rno-miR-326-3p	circRNA_1866|Chr13:108768806_108780643_-	166	-33.82	166	-33.82	9326	21	481	275
rno-miR-326-3p	circRNA_2031|Chr14:44491363_44492946_+	154	-32.44	154	-32.44	9491	21	649	376
rno-miR-326-3p	circRNA_2246|Chr15:33610716_33637119_-	174	-31.65	174	-31.65	9706	21	25030	13341
rno-miR-326-3p	circRNA_2247|Chr15:33616829_33642831_-	174	-31.65	174	-31.65	9707	21	20738	15162
rno-miR-326-3p	circRNA_2248|Chr15:33617554_33645321_-	174	-31.65	174	-31.65	9708	21	20250	15399
rno-miR-328a-5p	circRNA_1827|Chr13:96986684_97023051_-	156	-33.87	156	-33.87	12615	19	701	268
rno-miR-328a-5p	circRNA_1828|Chr13:97022518_97023051_-	156	-33.87	156	-33.87	12616	19	534	268
rno-miR-328a-5p	circRNA_1900|Chr14:5870915_5943886_+	168	-32.47	168	-32.47	12688	19	72972	49818
rno-miR-328a-5p	circRNA_1901|Chr14:5871986_5944415_+	168	-32.47	168	-32.47	12689	19	72430	48747
rno-miR-328a-5p	circRNA_2028|Chr14:44305779_44331475_-	153	-32.05	153	-32.05	12816	19	8343	600
rno-miR-328a-5p	circRNA_2029|Chr14:44314767_44331475_-	153	-32.05	153	-32.05	12817	19	10154	600
rno-miR-328a-5p	circRNA_2053|Chr14:69774150_69819258_+	152	-32.4	152	-32.4	12841	19	26358	3300
rno-miR-328a-5p	circRNA_2173|Chr14:112869714_112923270_-	169	-34.19	169	-34.19	12961	19	53557	22864
rno-miR-328a-5p	circRNA_2195|Chr15:3233141_3251292_-	172	-34.47	172	-34.47	12983	19	12477	11356
rno-miR-328a-5p	circRNA_2214|Chr15:13212908_13287792_-	156	-31.95	156	-31.95	13002	19	59518	25255
rno-miR-328a-5p	circRNA_2224|Chr15:20724961_20751380_-	163	-32.54	163	-32.54	13012	19	26420	15764
rno-miR-328a-5p	circRNA_2340|Chr15:56885591_56913746_-	319	-64.29	163	-33.66	13128	19	28156	1014 23027
rno-miR-328a-5p	circRNA_2464|Chr16:22715018_22741348_+	161	-30.9	161	-30.9	13252	19	18096	14380
rno-miR-328a-5p	circRNA_2466|Chr16:22722576_22741348_+	161	-30.9	161	-30.9	13254	19	17516	13800
rno-miR-328a-3p	circRNA_1900|Chr14:5870915_5943886_+	154	-36.47	154	-36.47	13520	22	72972	43138
rno-miR-328a-3p	circRNA_1901|Chr14:5871986_5944415_+	154	-36.47	154	-36.47	13521	22	72430	42067
rno-miR-328a-3p	circRNA_2408|Chr16:2430711_2437638_+	157	-30.34	157	-30.34	14028	22	1248	878
rno-miR-330-5p	circRNA_1866|Chr13:108768806_108780643_-	168	-34.69	168	-34.69	15982	22	481	275
rno-miR-330-5p	circRNA_1900|Chr14:5870915_5943886_+	162	-30.28	162	-30.28	16016	22	72972	12097
rno-miR-330-5p	circRNA_1901|Chr14:5871986_5944415_+	317	-64.77	162	-34.49	16017	22	72430	11026 72226
rno-miR-330-5p	circRNA_2214|Chr15:13212908_13287792_-	167	-33.45	167	-33.45	16330	22	59518	3385
rno-miR-330-5p	circRNA_2255|Chr15:36823412_36828644_+	173	-33.57	173	-33.57	16371	22	401	144
rno-miR-330-5p	circRNA_2256|Chr15:36823412_36848501_+	173	-33.57	173	-33.57	16372	22	1449	144
rno-miR-330-5p	circRNA_2340|Chr15:56885591_56913746_-	163	-32.2	163	-32.2	16456	22	28156	3542
rno-miR-330-5p	circRNA_2451|Chr16:19726549_19747711_+	161	-33.17	161	-33.17	16567	22	3070	1864
rno-miR-331-3p	circRNA_2204|Chr15:5547350_5563569_-	316	-60.88	158	-30.44	18816	21	16220	1711 11338
rno-miR-331-3p	circRNA_2241|Chr15:28155239_28192349_-	161	-33.79	161	-33.79	18853	21	37111	11863
rno-miR-331-3p	circRNA_2496|Chr16:32457520_32480855_+	162	-32.03	162	-32.03	19108	21	23336	14870
rno-miR-140-3p	circRNA_1954|Chr14:23630512_23654497_+	165	-30.65	165	-30.65	20230	21	1977	299
rno-miR-337-5p	circRNA_2013|Chr14:43400193_43430679_+	165	-30.97	165	-30.97	23617	21	21062	2356
rno-miR-337-5p	circRNA_2014|Chr14:43400193_43461320_+	165	-30.97	165	-30.97	23618	21	21337	2356
rno-miR-339-5p	circRNA_1806|Chr13:89336922_89423597_-	160	-31.63	160	-31.63	28402	23	80143	37723
rno-miR-339-5p	circRNA_2056|Chr14:69818122_69820605_+	166	-32	166	-32	28652	23	1557	787
rno-miR-339-5p	circRNA_2214|Chr15:13212908_13287792_-	163	-30.65	163	-30.65	28810	23	59518	32258
rno-miR-339-5p	circRNA_2224|Chr15:20724961_20751380_-	162	-30.46	162	-30.46	28820	23	26420	22338
rno-miR-339-5p	circRNA_2374|Chr15:86418043_86424043_+	168	-30.08	168	-30.08	28970	23	1240	242
rno-miR-339-5p	circRNA_2375|Chr15:86418043_86435486_+	168	-30.08	168	-30.08	28971	23	1517	242
rno-miR-339-5p	circRNA_2376|Chr15:86418043_86453226_+	168	-30.08	168	-30.08	28972	23	3090	242
rno-miR-342-5p	circRNA_2214|Chr15:13212908_13287792_-	157	-30.15	157	-30.15	32970	22	59518	54399
rno-miR-342-3p	circRNA_2214|Chr15:13212908_13287792_-	166	-30.1	166	-30.1	33802	23	59518	32970
rno-miR-343	circRNA_1951|Chr14:22874758_22891013_-	169	-31.21	169	-31.21	34371	20	16256	15327
rno-miR-343	circRNA_2107|Chr14:84288820_84316036_+	169	-36.41	169	-36.41	34527	20	18752	3271
rno-miR-343	circRNA_2173|Chr14:112869714_112923270_-	167	-30.56	167	-30.56	34593	20	53557	23260
rno-miR-343	circRNA_2272|Chr15:39680680_39703475_-	166	-35.19	166	-35.19	34692	20	14031	6568
rno-miR-344a-5p	circRNA_1900|Chr14:5870915_5943886_+	168	-32.58	168	-32.58	35152	19	72972	27094
rno-miR-344a-5p	circRNA_1901|Chr14:5871986_5944415_+	168	-32.58	168	-32.58	35153	19	72430	26023
rno-miR-345-5p	circRNA_1951|Chr14:22874758_22891013_-	167	-30.13	167	-30.13	36867	21	16256	11596
rno-miR-345-3p	circRNA_1899|Chr14:5555533_5630332_-	337	-62.1	171	-31.23	37647	22	18054	12124 9631
rno-miR-346	circRNA_1898|Chr14:5437233_5452115_-	159	-33.99	159	-33.99	38478	23	14883	6563
rno-miR-346	circRNA_2224|Chr15:20724961_20751380_-	166	-33.96	166	-33.96	38804	23	26420	21692
rno-miR-346	circRNA_2229|Chr15:23792824_23801848_+	161	-30.88	161	-30.88	38809	23	9025	6574
rno-miR-346	circRNA_2524|Chr16:61986996_62026513_+	176	-39.68	176	-39.68	39104	23	36595	18919
rno-miR-347	circRNA_1886|Chr14:2924636_2946057_+	165	-31.61	165	-31.61	39298	19	720	547
rno-miR-347	circRNA_1887|Chr14:2924636_3011669_+	165	-31.61	165	-31.61	39299	19	2247	547
rno-miR-347	circRNA_1888|Chr14:2944122_2946057_+	165	-31.61	165	-31.61	39300	19	490	317
rno-miR-347	circRNA_1889|Chr14:2944122_2955913_+	165	-31.61	165	-31.61	39301	19	1009	317
rno-miR-349	circRNA_1806|Chr13:89336922_89423597_-	171	-31.33	171	-31.33	40050	22	80143	12774
rno-miR-349	circRNA_1914|Chr14:10419799_10420720_-	170	-31.48	170	-31.48	40158	22	922	575
rno-miR-349	circRNA_2246|Chr15:33610716_33637119_-	162	-34.57	162	-34.57	40490	22	25030	22823
rno-miR-351-5p	circRNA_1700|Chr13:51710812_51714375_-	161	-31.9	161	-31.9	46600	25	314	220
rno-miR-351-5p	circRNA_1743|Chr13:73219583_73255342_+	161	-31.23	161	-31.23	46643	25	20428	18233
rno-miR-351-5p	circRNA_1744|Chr13:73219583_73265813_+	161	-31.23	161	-31.23	46644	25	20518	18233
rno-miR-351-5p	circRNA_1751|Chr13:73708986_73713123_+	164	-32.27	164	-32.27	46651	25	4138	3070
rno-miR-351-5p	circRNA_1900|Chr14:5870915_5943886_+	165	-30.81	165	-30.81	46800	25	72972	52185
rno-miR-351-5p	circRNA_1901|Chr14:5871986_5944415_+	165	-30.81	165	-30.81	46801	25	72430	51114
rno-miR-351-5p	circRNA_1902|Chr14:5990330_6026568_+	166	-31.23	166	-31.23	46802	25	15249	2727
rno-miR-351-5p	circRNA_1992|Chr14:37579854_37584371_+	151	-31.33	151	-31.33	46892	25	1500	646
rno-miR-351-5p	circRNA_2173|Chr14:112869714_112923270_-	181	-37.99	181	-37.99	47073	25	53557	33076
rno-miR-351-5p	circRNA_2216|Chr15:16170084_16229620_+	165	-31.47	165	-31.47	47116	25	59537	58866
rno-miR-351-5p	circRNA_2241|Chr15:28155239_28192349_-	167	-35.23	167	-35.23	47141	25	37111	23773
rno-miR-351-5p	circRNA_2524|Chr16:61986996_62026513_+	335	-67.43	171	-34.96	47424	25	36595	28111 26643
rno-miR-351-3p	circRNA_1899|Chr14:5555533_5630332_-	169	-31.18	169	-31.18	47631	21	18054	9119
rno-miR-351-3p	circRNA_2216|Chr15:16170084_16229620_+	162	-30.77	162	-30.77	47948	21	59537	20712
rno-miR-21-3p	circRNA_2214|Chr15:13212908_13287792_-	155	-30.83	155	-30.83	85386	22	59518	16599
rno-miR-22-5p	circRNA_2173|Chr14:112869714_112923270_-	183	-32.99	183	-32.99	86177	22	53557	569
rno-miR-23a-5p	circRNA_2229|Chr15:23792824_23801848_+	163	-32.14	163	-32.14	87897	22	9025	517
rno-miR-24-1-5p	circRNA_1806|Chr13:89336922_89423597_-	169	-30.02	169	-30.02	90802	22	80143	53986
rno-miR-29a-3p	circRNA_2451|Chr16:19726549_19747711_+	172	-30.04	172	-30.04	106423	22	3070	1207
rno-miR-30c-1-3p	circRNA_1717|Chr13:60116309_60156183_-	172	-31.12	172	-31.12	109849	22	39875	17575
rno-miR-30c-1-3p	circRNA_2214|Chr15:13212908_13287792_-	171	-33.28	171	-33.28	110346	22	59518	49360
rno-miR-34a-5p	circRNA_1894|Chr14:3169161_3183127_-	170	-30.05	170	-30.05	126666	22	1131	821
rno-miR-93-3p	circRNA_2347|Chr15:60669458_60673269_-	170	-31.46	170	-31.46	132111	23	3812	602
rno-miR-96-5p	circRNA_2241|Chr15:28155239_28192349_-	370	-62.44	185	-31.22	132837	23	37111	27884 33246
rno-miR-99b-3p	circRNA_1997|Chr14:41901823_41945264_-	176	-30.87	176	-30.87	138417	22	43442	16446
rno-miR-103-1-5p	circRNA_2448|Chr16:18718993_18719132_+	164	-30.64	164	-30.64	144692	24	140	93
rno-miR-106b-3p	circRNA_2173|Chr14:112869714_112923270_-	163	-31.58	163	-31.58	146081	22	53557	20167
rno-miR-125a-5p	circRNA_1743|Chr13:73219583_73255342_+	166	-32.1	166	-32.1	151475	24	20428	17816
rno-miR-125a-5p	circRNA_1744|Chr13:73219583_73265813_+	166	-32.1	166	-32.1	151476	24	20518	17816
rno-miR-125a-5p	circRNA_1751|Chr13:73708986_73713123_+	188	-36.81	188	-36.81	151483	24	4138	3068
rno-miR-125a-5p	circRNA_2173|Chr14:112869714_112923270_-	180	-35.08	180	-35.08	151905	24	53557	33074
rno-miR-125a-3p	circRNA_1701|Chr13:51767780_51769071_-	183	-37.21	183	-37.21	152265	22	1292	12
rno-miR-125a-3p	circRNA_1899|Chr14:5555533_5630332_-	164	-30.96	164	-30.96	152463	22	18054	4746
rno-miR-125a-3p	circRNA_1903|Chr14:6026321_6082793_+	164	-30.96	164	-30.96	152467	22	43599	26286
rno-miR-125b-5p	circRNA_1751|Chr13:73708986_73713123_+	169	-31.86	169	-31.86	153147	22	4138	3068
rno-miR-125b-2-3p	circRNA_2340|Chr15:56885591_56913746_-	174	-30.94	174	-30.94	155400	22	28156	934
rno-miR-127-3p	circRNA_1949|Chr14:20943722_20944988_-	172	-32.62	172	-32.62	158337	22	342	90
rno-miR-134-5p	circRNA_2011|Chr14:42939572_42956092_-	162	-30.39	162	-30.39	169215	22	16521	7421
rno-miR-134-3p	circRNA_1920|Chr14:10792005_10800254_+	174	-33.67	174	-33.67	169956	22	5661	3463
rno-miR-134-3p	circRNA_2013|Chr14:43400193_43430679_+	168	-30.27	168	-30.27	170049	22	21062	3281
rno-miR-134-3p	circRNA_2014|Chr14:43400193_43461320_+	168	-30.27	168	-30.27	170050	22	21337	3281
rno-miR-138-5p	circRNA_1846|Chr13:101498614_101503027_-	172	-34.4	172	-34.4	175706	23	4414	467
rno-miR-138-5p	circRNA_1847|Chr13:101502509_101503027_-	172	-34.4	172	-34.4	175707	23	519	467
rno-miR-138-5p	circRNA_1920|Chr14:10792005_10800254_+	173	-31.77	173	-31.77	175780	23	5661	3031
rno-miR-138-5p	circRNA_2524|Chr16:61986996_62026513_+	170	-32.41	170	-32.41	176384	23	36595	35857
rno-miR-139-3p	circRNA_1899|Chr14:5555533_5630332_-	166	-30.95	166	-30.95	179087	22	18054	12044
rno-miR-141-5p	circRNA_1714|Chr13:56991070_57016492_-	164	-30.07	164	-30.07	179734	22	1992	1029
rno-miR-141-5p	circRNA_1970|Chr14:33621044_33627067_+	183	-33.08	183	-33.08	179990	22	855	615
rno-miR-150-5p	circRNA_1873|Chr13:113735261_113748416_+	174	-33.84	174	-33.84	189877	22	13156	4720
rno-miR-150-5p	circRNA_1900|Chr14:5870915_5943886_+	342	-62	171	-31	189904	22	72972	19552 33936
rno-miR-150-5p	circRNA_1901|Chr14:5871986_5944415_+	342	-62	171	-31	189905	22	72430	18481 32865
rno-miR-150-5p	circRNA_1997|Chr14:41901823_41945264_-	171	-31	171	-31	190001	22	43442	21618
rno-miR-185-5p	circRNA_1900|Chr14:5870915_5943886_+	171	-30.21	171	-30.21	204880	22	72972	49392
rno-miR-185-5p	circRNA_1901|Chr14:5871986_5944415_+	171	-30.21	171	-30.21	204881	22	72430	48321
rno-miR-193a-5p	circRNA_2246|Chr15:33610716_33637119_-	165	-30.46	165	-30.46	215210	22	25030	4159
rno-miR-193a-5p	circRNA_2247|Chr15:33616829_33642831_-	165	-30.46	165	-30.46	215211	22	20738	5980
rno-miR-193a-5p	circRNA_2248|Chr15:33617554_33645321_-	165	-30.46	165	-30.46	215212	22	20250	6217
rno-miR-193a-5p	circRNA_2249|Chr15:33623653_33651110_-	165	-30.46	165	-30.46	215213	22	15672	7738
rno-miR-193a-5p	circRNA_2250|Chr15:33627696_33655263_-	165	-30.46	165	-30.46	215214	22	12862	8971
rno-miR-193a-5p	circRNA_2510|Chr16:49676737_49693580_-	174	-31.56	174	-31.56	215474	22	714	456
rno-miR-200c-5p	circRNA_2524|Chr16:61986996_62026513_+	167	-31.21	167	-31.21	223808	21	36595	4770
rno-miR-200a-5p	circRNA_2067|Chr14:72468750_72507979_+	173	-30.67	173	-30.67	225015	21	39230	33414
rno-miR-200a-5p	circRNA_2068|Chr14:72473810_72507979_+	173	-30.67	173	-30.67	225016	21	34170	28354
rno-miR-204-3p	circRNA_2216|Chr15:16170084_16229620_+	172	-30.35	172	-30.35	230988	22	59537	36908
rno-miR-216a-3p	circRNA_1737|Chr13:70678863_70703404_-	165	-31.35	165	-31.35	243821	22	2862	1422
rno-miR-292-5p	circRNA_1900|Chr14:5870915_5943886_+	163	-31.65	163	-31.65	258960	22	72972	6674
rno-miR-292-5p	circRNA_1901|Chr14:5871986_5944415_+	163	-31.65	163	-31.65	258961	22	72430	5603
rno-miR-292-5p	circRNA_2241|Chr15:28155239_28192349_-	170	-31.59	170	-31.59	259301	22	37111	26356
rno-miR-296-5p	circRNA_2311|Chr15:52195200_52202455_-	156	-30.86	156	-30.86	261035	21	923	413
rno-miR-296-3p	circRNA_1997|Chr14:41901823_41945264_-	163	-30.23	163	-30.23	261553	22	43442	30417
rno-miR-296-3p	circRNA_2216|Chr15:16170084_16229620_+	161	-30.62	161	-30.62	261772	22	59537	40888
rno-miR-296-3p	circRNA_2241|Chr15:28155239_28192349_-	325	-62.9	165	-32.67	261797	22	37111	32004 6023
rno-miR-296-3p	circRNA_2246|Chr15:33610716_33637119_-	174	-33.17	174	-33.17	261802	22	25030	15632
rno-miR-296-3p	circRNA_2247|Chr15:33616829_33642831_-	174	-33.17	174	-33.17	261803	22	20738	17453
rno-miR-296-3p	circRNA_2248|Chr15:33617554_33645321_-	174	-33.17	174	-33.17	261804	22	20250	17690
rno-miR-296-3p	circRNA_2340|Chr15:56885591_56913746_-	154	-31.11	154	-31.11	261896	22	28156	21137
rno-miR-296-3p	circRNA_2424|Chr16:7268256_7273199_-	159	-30.4	159	-30.4	261980	22	859	133
rno-miR-296-3p	circRNA_2425|Chr16:7272104_7273199_-	159	-30.4	159	-30.4	261981	22	249	133
rno-miR-297	circRNA_1806|Chr13:89336922_89423597_-	189	-31.68	189	-31.68	262194	23	80143	35148
rno-miR-297	circRNA_2241|Chr15:28155239_28192349_-	184	-30.61	184	-30.61	262629	23	37111	25309
rno-miR-298-5p	circRNA_1821|Chr13:95193009_95276450_-	159	-31.05	159	-31.05	263041	23	46193	31990
rno-miR-298-5p	circRNA_1874|Chr13:113832448_113836291_-	156	-30.52	156	-30.52	263094	23	286	150
rno-miR-298-5p	circRNA_1875|Chr13:113832448_113840267_-	312	-61.04	156	-30.52	263095	23	481	150 345
rno-miR-298-5p	circRNA_1876|Chr13:113832448_113844645_-	312	-61.04	156	-30.52	263096	23	670	339 534
rno-miR-298-5p	circRNA_1877|Chr13:113832448_113847832_-	312	-61.04	156	-30.52	263097	23	1069	738 933
rno-miR-298-5p	circRNA_2107|Chr14:84288820_84316036_+	334	-61.92	168	-31.9	263327	23	18752	6218 15806
rno-miR-298-5p	circRNA_2173|Chr14:112869714_112923270_-	159	-30.01	159	-30.01	263393	23	53557	36394
rno-miR-298-5p	circRNA_2214|Chr15:13212908_13287792_-	159	-31.65	159	-31.65	263434	23	59518	41132
rno-miR-298-5p	circRNA_2230|Chr15:23840157_23848858_+	151	-30.97	151	-30.97	263450	23	510	441
rno-miR-298-5p	circRNA_2231|Chr15:23840157_23853169_+	151	-30.97	151	-30.97	263451	23	596	441
rno-miR-298-5p	circRNA_2340|Chr15:56885591_56913746_-	160	-31.67	160	-31.67	263560	23	28156	1497
rno-miR-320-5p	circRNA_1815|Chr13:95012881_95030583_+	168	-33.78	168	-33.78	268027	22	17703	9347
rno-miR-320-5p	circRNA_1900|Chr14:5870915_5943886_+	176	-38.21	176	-38.21	268112	22	72972	65422
rno-miR-320-5p	circRNA_1901|Chr14:5871986_5944415_+	176	-38.21	176	-38.21	268113	22	72430	64351
rno-miR-320-5p	circRNA_1920|Chr14:10792005_10800254_+	172	-35.76	172	-35.76	268132	22	5661	2519
rno-miR-320-5p	circRNA_1978|Chr14:36341464_36341713_+	171	-32.25	171	-32.25	268190	22	250	160
rno-miR-320-5p	circRNA_2013|Chr14:43400193_43430679_+	164	-30.4	164	-30.4	268225	22	21062	4860
rno-miR-320-5p	circRNA_2014|Chr14:43400193_43461320_+	164	-30.4	164	-30.4	268226	22	21337	4860
rno-miR-320-5p	circRNA_2103|Chr14:83245280_83262412_+	170	-33.37	170	-33.37	268315	22	5105	2560
rno-miR-320-5p	circRNA_2120|Chr14:85033565_85061960_-	175	-32.02	175	-32.02	268332	22	885	854
rno-miR-320-5p	circRNA_2214|Chr15:13212908_13287792_-	163	-30.37	163	-30.37	268426	22	59518	4020
rno-miR-320-5p	circRNA_2516|Chr16:54080267_54093004_-	175	-31.34	175	-31.34	268728	22	1618	177
rno-miR-320-5p	circRNA_2517|Chr16:54080267_54100069_-	175	-31.34	175	-31.34	268729	22	2447	1006
rno-miR-320-5p	circRNA_2518|Chr16:54083122_54100069_-	175	-31.34	175	-31.34	268730	22	2088	1006
rno-miR-207	circRNA_1806|Chr13:89336922_89423597_-	513	-104.99	176	-37.22	287986	23	80143	71353 53324 40535
rno-miR-207	circRNA_1900|Chr14:5870915_5943886_+	344	-66.07	176	-33.79	288080	23	72972	61229 61274
rno-miR-207	circRNA_1901|Chr14:5871986_5944415_+	344	-66.07	176	-33.79	288081	23	72430	60158 60203
rno-miR-207	circRNA_1997|Chr14:41901823_41945264_-	170	-30.44	170	-30.44	288177	23	43442	33033
rno-miR-207	circRNA_2057|Chr14:71300944_71309114_-	167	-34.95	167	-34.95	288237	23	8171	6808
rno-miR-207	circRNA_2131|Chr14:88724076_88740263_-	160	-31.85	160	-31.85	288311	23	1617	217
rno-miR-207	circRNA_2132|Chr14:88739007_88740263_-	160	-31.85	160	-31.85	288312	23	1257	217
rno-miR-207	circRNA_2162|Chr14:107594175_107594869_-	151	-33.11	151	-33.11	288342	23	695	120
rno-miR-207	circRNA_2214|Chr15:13212908_13287792_-	174	-35.81	174	-35.81	288394	23	59518	4018
rno-miR-207	circRNA_2216|Chr15:16170084_16229620_+	158	-30.17	158	-30.17	288396	23	59537	31186
rno-miR-207	circRNA_2241|Chr15:28155239_28192349_-	172	-31.16	172	-31.16	288421	23	37111	18933
rno-miR-207	circRNA_2463|Chr16:22715018_22731555_+	173	-30.22	173	-30.22	288643	23	8303	3162
rno-miR-207	circRNA_2464|Chr16:22715018_22741348_+	173	-30.22	173	-30.22	288644	23	18096	3162
rno-miR-207	circRNA_2466|Chr16:22722576_22741348_+	173	-30.22	173	-30.22	288646	23	17516	2582
rno-miR-483-3p	circRNA_1848|Chr13:101580285_101582341_-	162	-31.78	162	-31.78	295516	22	2057	249
rno-miR-483-3p	circRNA_2204|Chr15:5547350_5563569_-	157	-30.46	157	-30.46	295872	22	16220	8825
rno-miR-483-3p	circRNA_2524|Chr16:61986996_62026513_+	167	-31.89	167	-31.89	296192	22	36595	35007
rno-miR-370-5p	circRNA_1899|Chr14:5555533_5630332_-	170	-30.64	170	-30.64	296399	24	18054	10077
rno-miR-370-5p	circRNA_2107|Chr14:84288820_84316036_+	166	-30.78	166	-30.78	296607	24	18752	18058
rno-miR-370-3p	circRNA_1773|Chr13:78827189_78837747_-	153	-30.31	153	-30.31	297105	22	10559	8605
rno-miR-370-3p	circRNA_1921|Chr14:10877146_10878137_+	162	-30.33	162	-30.33	297253	22	549	348
rno-miR-370-3p	circRNA_2011|Chr14:42939572_42956092_-	162	-32.42	162	-32.42	297343	22	16521	8436
rno-miR-370-3p	circRNA_2033|Chr14:45668936_45683858_-	172	-33.53	172	-33.53	297365	22	1125	535
rno-miR-370-3p	circRNA_2034|Chr14:45668936_45691895_-	172	-33.53	172	-33.53	297366	22	1459	869
rno-miR-370-3p	circRNA_2035|Chr14:45668936_45695367_-	172	-33.53	172	-33.53	297367	22	1900	1310
rno-miR-370-3p	circRNA_2067|Chr14:72468750_72507979_+	162	-32.8	162	-32.8	297399	22	39230	16403
rno-miR-370-3p	circRNA_2068|Chr14:72473810_72507979_+	162	-32.8	162	-32.8	297400	22	34170	11343
rno-miR-370-3p	circRNA_2229|Chr15:23792824_23801848_+	162	-31.11	162	-31.11	297561	22	9025	1522
rno-miR-370-3p	circRNA_2241|Chr15:28155239_28192349_-	161	-30.53	161	-30.53	297573	22	37111	26199
rno-miR-370-3p	circRNA_2474|Chr16:23555919_23624759_+	183	-41.39	183	-41.39	297806	22	25155	19715
rno-miR-370-3p	circRNA_2524|Chr16:61986996_62026513_+	166	-34.08	166	-34.08	297856	22	36595	22433
rno-miR-540-3p	circRNA_1815|Chr13:95012881_95030583_+	180	-40.61	180	-40.61	305467	22	17703	5479
rno-miR-540-3p	circRNA_1920|Chr14:10792005_10800254_+	159	-30.24	159	-30.24	305572	22	5661	4782
rno-miR-540-3p	circRNA_2214|Chr15:13212908_13287792_-	155	-31.53	155	-31.53	305866	22	59518	39166
rno-miR-540-3p	circRNA_2269|Chr15:38651172_38701205_-	161	-30.27	161	-30.27	305921	22	42367	1464
rno-miR-540-3p	circRNA_2270|Chr15:38661026_38709984_-	161	-30.27	161	-30.27	305922	22	33066	2017
rno-miR-493-5p	circRNA_1762|Chr13:76952080_76971414_+	176	-30.17	176	-30.17	312902	22	6150	675
rno-miR-493-3p	circRNA_1873|Chr13:113735261_113748416_+	170	-31.99	170	-31.99	313845	21	13156	903
rno-miR-485-5p	circRNA_1900|Chr14:5870915_5943886_+	168	-32.32	168	-32.32	328016	22	72972	60482
rno-miR-485-5p	circRNA_1901|Chr14:5871986_5944415_+	168	-32.32	168	-32.32	328017	22	72430	59411
rno-miR-20b-3p	circRNA_2494|Chr16:32100487_32121085_-	165	-30.9	165	-30.9	337762	22	789	421
rno-miR-503-5p	circRNA_2496|Chr16:32457520_32480855_+	166	-31.84	166	-31.84	338596	23	23336	11135
rno-miR-378a-5p	circRNA_1762|Chr13:76952080_76971414_+	171	-30.7	171	-30.7	339526	22	6150	2807
rno-miR-378a-5p	circRNA_1815|Chr13:95012881_95030583_+	165	-32.4	165	-32.4	339579	22	17703	9862
rno-miR-378a-5p	circRNA_1900|Chr14:5870915_5943886_+	165	-31.68	165	-31.68	339664	22	72972	56288
rno-miR-378a-5p	circRNA_1901|Chr14:5871986_5944415_+	165	-31.68	165	-31.68	339665	22	72430	55217
rno-miR-378a-5p	circRNA_2107|Chr14:84288820_84316036_+	155	-30.27	155	-30.27	339871	22	18752	3481
rno-miR-378a-5p	circRNA_2246|Chr15:33610716_33637119_-	165	-31.75	165	-31.75	340010	22	25030	22833
rno-miR-378a-3p	circRNA_1806|Chr13:89336922_89423597_-	182	-30.01	182	-30.01	340402	21	80143	15696
rno-miR-497-5p	circRNA_1899|Chr14:5555533_5630332_-	168	-31.15	168	-31.15	347151	22	18054	14033
rno-miR-497-5p	circRNA_1903|Chr14:6026321_6082793_+	168	-31.15	168	-31.15	347155	22	43599	29123
rno-miR-497-5p	circRNA_2154|Chr14:106153575_106167943_+	167	-31.72	167	-31.72	347406	22	994	880
rno-miR-466b-5p	circRNA_1898|Chr14:5437233_5452115_-	181	-30.1	181	-30.1	348814	22	14883	6423
rno-miR-466b-5p	circRNA_2204|Chr15:5547350_5563569_-	188	-30.54	188	-30.54	349120	22	16220	15336
rno-miR-466b-3p	circRNA_2175|Chr14:113271542_113314869_+	196	-37.76	196	-37.76	349923	22	21269	2017
rno-miR-466b-3p	circRNA_2340|Chr15:56885591_56913746_-	188	-31.42	188	-31.42	350088	22	28156	17255
rno-miR-466c-3p	circRNA_2216|Chr15:16170084_16229620_+	195	-36.24	195	-36.24	352460	21	59537	56819
rno-miR-872-3p	circRNA_2103|Chr14:83245280_83262412_+	178	-31.25	178	-31.25	357339	22	5105	4410
rno-miR-874-5p	circRNA_2166|Chr14:108131987_108179553_+	161	-30.49	161	-30.49	358234	21	3289	2638
rno-miR-874-5p	circRNA_2167|Chr14:108168031_108181540_+	161	-30.49	161	-30.49	358235	21	1006	268
rno-miR-874-5p	circRNA_2340|Chr15:56885591_56913746_-	158	-31.98	158	-31.98	358408	21	28156	21132
rno-miR-874-3p	circRNA_1806|Chr13:89336922_89423597_-	169	-36.21	169	-36.21	358706	22	80143	41718
rno-miR-874-3p	circRNA_1853|Chr13:102706769_102713916_-	150	-30.32	150	-30.32	358753	22	438	4
rno-miR-874-3p	circRNA_1854|Chr13:102712043_102717328_-	150	-30.32	150	-30.32	358754	22	478	178
rno-miR-874-3p	circRNA_1900|Chr14:5870915_5943886_+	163	-31.43	163	-31.43	358800	22	72972	11983
rno-miR-874-3p	circRNA_1901|Chr14:5871986_5944415_+	163	-31.43	163	-31.43	358801	22	72430	10912
rno-miR-874-3p	circRNA_1903|Chr14:6026321_6082793_+	166	-32.84	166	-32.84	358803	22	43599	18245
rno-miR-874-3p	circRNA_2033|Chr14:45668936_45683858_-	153	-30.59	153	-30.59	358933	22	1125	722
rno-miR-874-3p	circRNA_2034|Chr14:45668936_45691895_-	153	-30.59	153	-30.59	358934	22	1459	1056
rno-miR-874-3p	circRNA_2035|Chr14:45668936_45695367_-	153	-30.59	153	-30.59	358935	22	1900	1497
rno-miR-874-3p	circRNA_2214|Chr15:13212908_13287792_-	164	-34.08	164	-34.08	359114	22	59518	38818
rno-miR-874-3p	circRNA_2499|Chr16:47896917_47910476_+	156	-30.02	156	-30.02	359399	22	1293	608
rno-miR-880-3p	circRNA_2055|Chr14:69800154_69863668_+	167	-30.28	167	-30.28	363947	22	700	594
rno-miR-182	circRNA_2512|Chr16:50437205_50487053_-	158	-34.07	158	-34.07	371892	25	3601	2038
rno-miR-188-5p	circRNA_2474|Chr16:23555919_23624759_+	175	-30.76	175	-30.76	372686	21	25155	7266
rno-miR-301b-5p	circRNA_2214|Chr15:13212908_13287792_-	181	-32.71	181	-32.71	377418	22	59518	9567
rno-miR-423-5p	circRNA_1717|Chr13:60116309_60156183_-	172	-31.26	172	-31.26	386905	24	39875	5242
rno-miR-423-5p	circRNA_1806|Chr13:89336922_89423597_-	181	-32.51	181	-32.51	386994	24	80143	3266
rno-miR-532-3p	circRNA_1951|Chr14:22874758_22891013_-	162	-31.03	162	-31.03	401283	22	16256	1365
rno-miR-532-3p	circRNA_2107|Chr14:84288820_84316036_+	167	-30.38	167	-30.38	401439	22	18752	8074
rno-miR-532-3p	circRNA_2297|Chr15:48443441_48448185_-	179	-32.24	179	-32.24	401629	22	2693	1900
rno-miR-532-3p	circRNA_2340|Chr15:56885591_56913746_-	158	-34.84	158	-34.84	401672	22	28156	4863
rno-miR-532-3p	circRNA_2524|Chr16:61986996_62026513_+	180	-35.4	180	-35.4	401856	22	36595	5826
rno-miR-598-3p	circRNA_1977|Chr14:36188510_36202025_-	188	-32.6	188	-32.6	402973	22	645	97
rno-miR-671	circRNA_2011|Chr14:42939572_42956092_-	163	-30.39	163	-30.39	403839	21	16521	9459
rno-miR-672-3p	circRNA_2077|Chr14:81014692_81053908_-	174	-30.13	174	-30.13	405569	21	2122	422
rno-miR-672-3p	circRNA_2078|Chr14:81037649_81053908_-	174	-30.13	174	-30.13	405570	21	2100	422
rno-miR-672-3p	circRNA_2079|Chr14:81051926_81053908_-	174	-30.13	174	-30.13	405571	21	1983	422
rno-miR-673-5p	circRNA_1821|Chr13:95193009_95276450_-	157	-34.95	157	-34.95	406145	22	46193	6760
rno-miR-673-5p	circRNA_2109|Chr14:84719215_84751768_-	168	-31.83	168	-31.83	406433	22	1196	1056
rno-miR-673-5p	circRNA_2110|Chr14:84719215_84766181_-	168	-31.83	168	-31.83	406434	22	1342	1202
rno-miR-673-5p	circRNA_2464|Chr16:22715018_22741348_+	153	-33.47	153	-33.47	406788	22	18096	11512
rno-miR-673-5p	circRNA_2466|Chr16:22722576_22741348_+	153	-33.47	153	-33.47	406790	22	17516	10932
rno-miR-674-5p	circRNA_1806|Chr13:89336922_89423597_-	170	-31.57	170	-31.57	407794	22	80143	28290
rno-miR-674-5p	circRNA_2090|Chr14:81689519_81713818_-	171	-31.77	171	-31.77	408078	22	1659	232
rno-miR-674-5p	circRNA_2224|Chr15:20724961_20751380_-	170	-33.16	170	-33.16	408212	22	26420	6241
rno-miR-674-5p	circRNA_2229|Chr15:23792824_23801848_+	165	-31.86	165	-31.86	408217	22	9025	2616
rno-miR-674-5p	circRNA_2246|Chr15:33610716_33637119_-	178	-30.77	178	-30.77	408234	22	25030	16802
rno-miR-674-5p	circRNA_2247|Chr15:33616829_33642831_-	178	-30.77	178	-30.77	408235	22	20738	18623
rno-miR-674-5p	circRNA_2248|Chr15:33617554_33645321_-	178	-30.77	178	-30.77	408236	22	20250	18860
rno-miR-674-5p	circRNA_2460|Chr16:21153845_21157491_+	159	-30.68	159	-30.68	408448	22	1111	642
rno-miR-674-3p	circRNA_2297|Chr15:48443441_48448185_-	174	-32.93	174	-32.93	409117	22	2693	1904
rno-miR-758-5p	circRNA_2269|Chr15:38651172_38701205_-	167	-30.15	167	-30.15	414913	21	42367	31306
rno-miR-758-5p	circRNA_2270|Chr15:38661026_38709984_-	167	-30.15	167	-30.15	414914	21	33066	31859
rno-miR-760-5p	circRNA_2222|Chr15:19979328_19993685_-	160	-30.08	160	-30.08	416530	22	830	411
rno-miR-760-5p	circRNA_2360|Chr15:69920858_69929672_-	164	-34.09	164	-34.09	416668	22	8815	1619
rno-miR-760-5p	circRNA_2380|Chr15:88651499_88659273_-	158	-31.82	158	-31.82	416688	22	566	497
rno-miR-760-3p	circRNA_1792|Chr13:83862000_83865745_-	169	-33.17	169	-33.17	416932	20	1008	878
rno-miR-760-3p	circRNA_1806|Chr13:89336922_89423597_-	169	-34.87	169	-34.87	416946	20	80143	77898
rno-miR-760-3p	circRNA_1866|Chr13:108768806_108780643_-	161	-32.27	161	-32.27	417006	20	481	118
rno-miR-760-3p	circRNA_1955|Chr14:28418126_28430117_-	165	-36.04	165	-36.04	417095	20	392	279
rno-miR-760-3p	circRNA_1956|Chr14:28418126_28450930_-	165	-36.04	165	-36.04	417096	20	578	465
rno-miR-760-3p	circRNA_2163|Chr14:107724856_107728893_-	160	-34.56	160	-34.56	417303	20	4038	141
rno-miR-760-3p	circRNA_2512|Chr16:50437205_50487053_-	172	-30.34	172	-30.34	417652	20	3601	3427
rno-miR-770-5p	circRNA_1794|Chr13:84082407_84148391_-	178	-34.96	178	-34.96	417766	22	3512	2834
rno-miR-770-5p	circRNA_2214|Chr15:13212908_13287792_-	158	-30.2	158	-30.2	418186	22	59518	4649
rno-miR-873-5p	circRNA_1913|Chr14:9421418_9440942_-	167	-30.11	167	-30.11	419549	21	463	42
rno-miR-873-5p	circRNA_2103|Chr14:83245280_83262412_+	163	-30.62	163	-30.62	419739	21	5105	4910
rno-miR-92b-5p	circRNA_1734|Chr13:69862463_69885420_+	158	-30.53	158	-30.53	421034	24	763	413
rno-miR-92b-5p	circRNA_1755|Chr13:74445640_74450825_-	163	-31.46	163	-31.46	421055	24	1148	356
rno-miR-92b-5p	circRNA_2058|Chr14:71444881_71447466_+	170	-32.93	170	-32.93	421358	24	1713	843
rno-miR-652-5p	circRNA_1737|Chr13:70678863_70703404_-	163	-30.14	163	-30.14	424365	23	2862	1032
rno-miR-551b-3p	circRNA_2224|Chr15:20724961_20751380_-	167	-31.18	167	-31.18	429012	23	26420	14152
rno-miR-490-5p	circRNA_2229|Chr15:23792824_23801848_+	163	-31.22	163	-31.22	431513	20	9025	4217
rno-miR-105	circRNA_1951|Chr14:22874758_22891013_-	181	-32.15	181	-32.15	432899	22	16256	6144
rno-miR-1224	circRNA_1806|Chr13:89336922_89423597_-	321	-63.48	167	-32.55	433586	21	80143	51054 17089
rno-miR-1224	circRNA_1812|Chr13:93158565_93184258_-	157	-31.66	157	-31.66	433592	21	383	50
rno-miR-1224	circRNA_1813|Chr13:93158565_93233990_-	157	-31.66	157	-31.66	433593	21	434	101
rno-miR-1224	circRNA_2030|Chr14:44440261_44456717_+	165	-31.31	165	-31.31	433810	21	438	282
rno-miR-1224	circRNA_2474|Chr16:23555919_23624759_+	162	-30.14	162	-30.14	434254	21	25155	23152
rno-miR-1224	circRNA_2524|Chr16:61986996_62026513_+	160	-31.41	160	-31.41	434304	21	36595	36234
rno-miR-615	circRNA_1743|Chr13:73219583_73255342_+	167	-31.62	167	-31.62	443507	22	20428	16557
rno-miR-615	circRNA_1744|Chr13:73219583_73265813_+	167	-31.62	167	-31.62	443508	22	20518	16557
rno-miR-615	circRNA_1809|Chr13:90807808_90809452_-	158	-30.15	158	-30.15	443573	22	653	443
rno-miR-615	circRNA_1898|Chr14:5437233_5452115_-	169	-40.97	169	-40.97	443662	22	14883	3262
rno-miR-615	circRNA_1900|Chr14:5870915_5943886_+	320	-66.14	160	-33.07	443664	22	72972	20617 35001
rno-miR-615	circRNA_1901|Chr14:5871986_5944415_+	320	-66.14	160	-33.07	443665	22	72430	19546 33930
rno-miR-615	circRNA_2152|Chr14:104958186_104960143_-	171	-35.33	171	-35.33	443916	22	1958	1854
rno-miR-615	circRNA_2173|Chr14:112869714_112923270_-	163	-30.41	163	-30.41	443937	22	53557	23058
rno-miR-615	circRNA_2216|Chr15:16170084_16229620_+	166	-32.12	166	-32.12	443980	22	59537	29037
rno-miR-668	circRNA_2166|Chr14:108131987_108179553_+	158	-31.41	158	-31.41	448090	24	3289	665
rno-miR-675-5p	circRNA_2246|Chr15:33610716_33637119_-	159	-31.15	159	-31.15	450666	22	25030	5591
rno-miR-675-5p	circRNA_2247|Chr15:33616829_33642831_-	159	-31.15	159	-31.15	450667	22	20738	7412
rno-miR-675-5p	circRNA_2248|Chr15:33617554_33645321_-	159	-31.15	159	-31.15	450668	22	20250	7649
rno-miR-675-5p	circRNA_2249|Chr15:33623653_33651110_-	159	-31.15	159	-31.15	450669	22	15672	9170
rno-miR-675-5p	circRNA_2250|Chr15:33627696_33655263_-	159	-31.15	159	-31.15	450670	22	12862	10403
rno-miR-665	circRNA_1717|Chr13:60116309_60156183_-	166	-30.1	166	-30.1	453465	22	39875	10061
rno-miR-665	circRNA_1743|Chr13:73219583_73255342_+	169	-30.56	169	-30.56	453491	22	20428	13850
rno-miR-665	circRNA_1744|Chr13:73219583_73265813_+	169	-30.56	169	-30.56	453492	22	20518	13850
rno-miR-665	circRNA_2371|Chr15:85962566_85975367_-	166	-32.52	166	-32.52	454119	22	625	408
rno-miR-547-5p	circRNA_2067|Chr14:72468750_72507979_+	169	-30.52	169	-30.52	462967	22	39230	35092
rno-miR-547-5p	circRNA_2068|Chr14:72473810_72507979_+	169	-30.52	169	-30.52	462968	22	34170	30032
rno-miR-667-5p	circRNA_2013|Chr14:43400193_43430679_+	180	-36.8	180	-36.8	464577	24	21062	1658
rno-miR-667-5p	circRNA_2014|Chr14:43400193_43461320_+	180	-36.8	180	-36.8	464578	24	21337	1658
rno-miR-667-5p	circRNA_2099|Chr14:83166876_83173323_-	189	-36.28	189	-36.28	464663	24	449	421
rno-miR-667-5p	circRNA_2107|Chr14:84288820_84316036_+	167	-30.76	167	-30.76	464671	24	18752	17644
rno-miR-667-5p	circRNA_2156|Chr14:106481022_106500203_+	180	-32.52	180	-32.52	464720	24	11663	2475
rno-miR-667-5p	circRNA_2214|Chr15:13212908_13287792_-	165	-32.08	165	-32.08	464778	24	59518	2484
rno-miR-667-5p	circRNA_2269|Chr15:38651172_38701205_-	165	-31.54	165	-31.54	464833	24	42367	32193
rno-miR-667-5p	circRNA_2270|Chr15:38661026_38709984_-	165	-31.54	165	-31.54	464834	24	33066	32746
rno-miR-667-5p	circRNA_2521|Chr16:58956807_58962366_+	168	-30.25	168	-30.25	465085	24	282	102
rno-miR-667-3p	circRNA_2224|Chr15:20724961_20751380_-	163	-30.56	163	-30.56	465620	22	26420	21149
rno-miR-667-3p	circRNA_2524|Chr16:61986996_62026513_+	172	-34.36	172	-34.36	465920	22	36595	30252
rno-miR-761	circRNA_1740|Chr13:72960660_72969502_-	178	-30.36	178	-30.36	465968	22	540	192
rno-miR-761	circRNA_1741|Chr13:72960660_72984036_-	178	-30.36	178	-30.36	465969	22	642	294
rno-miR-761	circRNA_2246|Chr15:33610716_33637119_-	172	-30.8	172	-30.8	466474	22	25030	17205
rno-miR-761	circRNA_2247|Chr15:33616829_33642831_-	172	-30.8	172	-30.8	466475	22	20738	19026
rno-miR-761	circRNA_2248|Chr15:33617554_33645321_-	172	-30.8	172	-30.8	466476	22	20250	19263
rno-miR-761	circRNA_2510|Chr16:49676737_49693580_-	171	-33.44	171	-33.44	466738	22	714	445
rno-miR-764-3p	circRNA_1743|Chr13:73219583_73255342_+	170	-30.54	170	-30.54	467635	23	20428	9070
rno-miR-764-3p	circRNA_1744|Chr13:73219583_73265813_+	170	-30.54	170	-30.54	467636	23	20518	9070
rno-miR-764-3p	circRNA_1806|Chr13:89336922_89423597_-	165	-30.68	165	-30.68	467698	23	80143	42993
rno-miR-666-3p	circRNA_2241|Chr15:28155239_28192349_-	170	-31.56	170	-31.56	469797	23	37111	32300
rno-miR-666-3p	circRNA_2245|Chr15:33308128_33313813_-	160	-31.39	160	-31.39	469801	23	1690	585
rno-miR-666-3p	circRNA_2246|Chr15:33610716_33637119_-	177	-35.24	177	-35.24	469802	23	25030	20599
rno-miR-666-3p	circRNA_2247|Chr15:33616829_33642831_-	175	-35.07	175	-35.07	469803	23	20738	196
rno-miR-666-3p	circRNA_2248|Chr15:33617554_33645321_-	175	-35.07	175	-35.07	469804	23	20250	433
rno-miR-666-3p	circRNA_2249|Chr15:33623653_33651110_-	175	-35.07	175	-35.07	469805	23	15672	1954
rno-miR-666-3p	circRNA_2250|Chr15:33627696_33655263_-	175	-35.07	175	-35.07	469806	23	12862	3187
rno-miR-666-3p	circRNA_2269|Chr15:38651172_38701205_-	163	-32.05	163	-32.05	469825	23	42367	33295
rno-miR-678	circRNA_1806|Chr13:89336922_89423597_-	160	-32.02	160	-32.02	471026	22	80143	47447
rno-miR-678	circRNA_2360|Chr15:69920858_69929672_-	163	-31.65	163	-31.65	471580	22	8815	2672
rno-miR-711	circRNA_1900|Chr14:5870915_5943886_+	165	-31.41	165	-31.41	471952	22	72972	21023
rno-miR-711	circRNA_1901|Chr14:5871986_5944415_+	165	-31.41	165	-31.41	471953	22	72430	19952
rno-miR-711	circRNA_1992|Chr14:37579854_37584371_+	162	-30.34	162	-30.34	472044	22	1500	1408
rno-miR-711	circRNA_2011|Chr14:42939572_42956092_-	154	-30.14	154	-30.14	472063	22	16521	187
rno-miR-711	circRNA_2340|Chr15:56885591_56913746_-	169	-33.99	169	-33.99	472392	22	28156	25179
rno-miR-3541	circRNA_1717|Chr13:60116309_60156183_-	163	-32.19	163	-32.19	474265	18	39875	35971
rno-miR-3541	circRNA_1773|Chr13:78827189_78837747_-	172	-33.25	172	-33.25	474321	18	10559	487
rno-miR-3541	circRNA_1774|Chr13:78836820_78847234_-	172	-33.25	172	-33.25	474322	18	1028	587
rno-miR-3541	circRNA_1806|Chr13:89336922_89423597_-	325	-62.84	166	-31.43	474354	18	80143	77367 48734
rno-miR-3541	circRNA_1873|Chr13:113735261_113748416_+	163	-31.19	163	-31.19	474421	18	13156	10765
rno-miR-3541	circRNA_1899|Chr14:5555533_5630332_-	163	-30.29	163	-30.29	474447	18	18054	17658
rno-miR-3541	circRNA_1900|Chr14:5870915_5943886_+	163	-32.11	163	-32.11	474448	18	72972	35296
rno-miR-3541	circRNA_1901|Chr14:5871986_5944415_+	163	-32.11	163	-32.11	474449	18	72430	34225
rno-miR-3541	circRNA_1903|Chr14:6026321_6082793_+	326	-63.26	163	-31.63	474451	18	43599	2850 7056
rno-miR-3541	circRNA_2013|Chr14:43400193_43430679_+	163	-36.23	163	-36.23	474561	18	21062	3722
rno-miR-3541	circRNA_2014|Chr14:43400193_43461320_+	163	-36.23	163	-36.23	474562	18	21337	3722
rno-miR-3541	circRNA_2029|Chr14:44314767_44331475_-	161	-30.78	161	-30.78	474577	18	10154	9928
rno-miR-3541	circRNA_2224|Chr15:20724961_20751380_-	162	-31.19	162	-31.19	474772	18	26420	6011
rno-miR-3541	circRNA_2269|Chr15:38651172_38701205_-	158	-30.35	158	-30.35	474817	18	42367	41602
rno-miR-3541	circRNA_2524|Chr16:61986996_62026513_+	163	-32.45	163	-32.45	475072	18	36595	24698
rno-miR-3546	circRNA_2246|Chr15:33610716_33637119_-	200	-44.72	200	-44.72	479786	22	25030	22225
rno-miR-3547	circRNA_1806|Chr13:89336922_89423597_-	351	-67.79	184	-36.48	480178	23	80143	38182 71213
rno-miR-3547	circRNA_2241|Chr15:28155239_28192349_-	176	-31.32	176	-31.32	480613	23	37111	20834
rno-miR-3085	circRNA_2524|Chr16:61986996_62026513_+	173	-32.65	173	-32.65	483392	21	36595	15825
rno-miR-344b-5p	circRNA_1950|Chr14:21178781_21191619_+	169	-31.11	169	-31.11	487810	22	12839	12122
rno-miR-344b-5p	circRNA_2214|Chr15:13212908_13287792_-	176	-30.1	176	-30.1	488074	22	59518	39000
rno-miR-3552	circRNA_2273|Chr15:39715651_39718477_-	164	-30.73	164	-30.73	489797	21	430	180
rno-miR-3553	circRNA_2028|Chr14:44305779_44331475_-	171	-31.04	171	-31.04	490384	23	8343	3193
rno-miR-3553	circRNA_2029|Chr14:44314767_44331475_-	171	-31.04	171	-31.04	490385	23	10154	3193
rno-miR-3557-5p	circRNA_1844|Chr13:100885656_100893577_-	176	-30.23	176	-30.23	494360	22	379	212
rno-miR-3557-5p	circRNA_1845|Chr13:100885656_100893629_-	176	-30.23	176	-30.23	494361	22	431	264
rno-miR-3557-3p	circRNA_1752|Chr13:74035292_74042333_-	164	-31.54	164	-31.54	495100	22	781	215
rno-miR-3557-3p	circRNA_1754|Chr13:74038194_74042333_-	164	-31.54	164	-31.54	495102	22	455	215
rno-miR-3557-3p	circRNA_1755|Chr13:74445640_74450825_-	170	-30.99	170	-30.99	495103	22	1148	109
rno-miR-3557-3p	circRNA_1900|Chr14:5870915_5943886_+	169	-30.54	169	-30.54	495248	22	72972	66113
rno-miR-3557-3p	circRNA_1901|Chr14:5871986_5944415_+	169	-30.54	169	-30.54	495249	22	72430	65042
rno-miR-3557-3p	circRNA_2209|Chr15:12440027_12442724_-	155	-31.43	155	-31.43	495557	22	596	118
rno-miR-3560	circRNA_2192|Chr15:2849126_2867333_-	170	-31.61	170	-31.61	503028	22	1350	1307
rno-miR-3561-5p	circRNA_2340|Chr15:56885591_56913746_-	170	-30.71	170	-30.71	504008	21	28156	9873
rno-miR-3562	circRNA_1821|Chr13:95193009_95276450_-	163	-31.13	163	-31.13	505153	22	46193	39376
rno-miR-3562	circRNA_1900|Chr14:5870915_5943886_+	344	-69.74	172	-34.87	505232	22	72972	20460 34844
rno-miR-3562	circRNA_1901|Chr14:5871986_5944415_+	344	-69.74	172	-34.87	505233	22	72430	19389 33773
rno-miR-3562	circRNA_1951|Chr14:22874758_22891013_-	172	-34.87	172	-34.87	505283	22	16256	12732
rno-miR-3562	circRNA_1997|Chr14:41901823_41945264_-	172	-34.87	172	-34.87	505329	22	43442	21184
rno-miR-3562	circRNA_2246|Chr15:33610716_33637119_-	163	-32.71	163	-32.71	505578	22	25030	13725
rno-miR-3562	circRNA_2247|Chr15:33616829_33642831_-	163	-32.71	163	-32.71	505579	22	20738	15546
rno-miR-3562	circRNA_2248|Chr15:33617554_33645321_-	163	-32.71	163	-32.71	505580	22	20250	15783
rno-miR-3562	circRNA_2340|Chr15:56885591_56913746_-	168	-30.2	168	-30.2	505672	22	28156	19142
rno-miR-3562	circRNA_2347|Chr15:60669458_60673269_-	172	-31.21	172	-31.21	505679	22	3812	3141
rno-miR-3065-3p	circRNA_1743|Chr13:73219583_73255342_+	165	-30.07	165	-30.07	511731	24	20428	17200
rno-miR-3065-3p	circRNA_1744|Chr13:73219583_73265813_+	165	-30.07	165	-30.07	511732	24	20518	17200
rno-miR-3065-3p	circRNA_1961|Chr14:28489431_28536253_-	159	-32.43	159	-32.43	511949	24	1322	135
rno-miR-3065-3p	circRNA_1962|Chr14:28519958_28536253_-	159	-32.43	159	-32.43	511950	24	629	135
rno-miR-3065-3p	circRNA_1963|Chr14:28522856_28536253_-	159	-32.43	159	-32.43	511951	24	590	135
rno-miR-3065-3p	circRNA_1977|Chr14:36188510_36202025_-	166	-31.62	166	-31.62	511965	24	645	319
rno-miR-3065-3p	circRNA_2195|Chr15:3233141_3251292_-	151	-31.37	151	-31.37	512183	24	12477	9262
rno-miR-3065-3p	circRNA_2214|Chr15:13212908_13287792_-	156	-30.89	156	-30.89	512202	24	59518	9976
rno-miR-3569	circRNA_1873|Chr13:113735261_113748416_+	165	-31.51	165	-31.51	518517	21	13156	5278
rno-miR-3569	circRNA_2246|Chr15:33610716_33637119_-	170	-34.68	170	-34.68	518890	21	25030	5389
rno-miR-3569	circRNA_2247|Chr15:33616829_33642831_-	170	-34.68	170	-34.68	518891	21	20738	7210
rno-miR-3569	circRNA_2248|Chr15:33617554_33645321_-	170	-34.68	170	-34.68	518892	21	20250	7447
rno-miR-3569	circRNA_2249|Chr15:33623653_33651110_-	170	-34.68	170	-34.68	518893	21	15672	8968
rno-miR-3569	circRNA_2250|Chr15:33627696_33655263_-	170	-34.68	170	-34.68	518894	21	12862	10201
rno-miR-1188-5p	circRNA_2090|Chr14:81689519_81713818_-	163	-30.82	163	-30.82	522894	21	1659	218
rno-miR-3573-3p	circRNA_2173|Chr14:112869714_112923270_-	162	-30.48	162	-30.48	525473	23	53557	43484
rno-miR-3574	circRNA_2319|Chr15:52383307_52387851_-	172	-30.42	172	-30.42	528115	22	514	378
rno-miR-3577	circRNA_2214|Chr15:13212908_13287792_-	170	-30.12	170	-30.12	530506	21	59518	2750
rno-miR-3577	circRNA_2229|Chr15:23792824_23801848_+	166	-35.32	166	-35.32	530521	21	9025	7288
rno-miR-409b	circRNA_2013|Chr14:43400193_43430679_+	157	-30.64	157	-30.64	536129	23	21062	17061
rno-miR-409b	circRNA_2014|Chr14:43400193_43461320_+	157	-30.64	157	-30.64	536130	23	21337	17061
rno-miR-133c	circRNA_1815|Chr13:95012881_95030583_+	169	-31.68	169	-31.68	537595	21	17703	1627
rno-miR-3584-5p	circRNA_1997|Chr14:41901823_41945264_-	167	-32.7	167	-32.7	540273	18	43442	24711
rno-miR-3584-5p	circRNA_2163|Chr14:107724856_107728893_-	152	-30.77	152	-30.77	540439	18	4038	4008
rno-miR-3584-5p	circRNA_2214|Chr15:13212908_13287792_-	942	-183.93	163	-31.56	540490	18	59518	6465 58412 6504 6525 6537 6573
rno-miR-3584-5p	circRNA_2215|Chr15:16089766_16093572_+	159	-30.25	159	-30.25	540491	18	3807	3443
rno-miR-3584-5p	circRNA_2216|Chr15:16170084_16229620_+	162	-30.69	162	-30.69	540492	18	59537	54240
rno-miR-3584-5p	circRNA_2229|Chr15:23792824_23801848_+	310	-60.96	155	-30.48	540505	18	9025	1241 1294
rno-miR-3584-5p	circRNA_2340|Chr15:56885591_56913746_-	316	-63.03	164	-32.99	540616	18	28156	23882 23669
rno-miR-702-3p	circRNA_1743|Chr13:73219583_73255342_+	170	-37.58	170	-37.58	548339	23	20428	2196
rno-miR-702-3p	circRNA_1744|Chr13:73219583_73265813_+	170	-37.58	170	-37.58	548340	23	20518	2196
rno-miR-702-3p	circRNA_1806|Chr13:89336922_89423597_-	153	-31.25	153	-31.25	548402	23	80143	12667
rno-miR-702-3p	circRNA_1825|Chr13:96224103_96226179_-	160	-33.94	160	-33.94	548421	23	2077	1582
rno-miR-702-3p	circRNA_2175|Chr14:113271542_113314869_+	173	-40.52	173	-40.52	548771	23	21269	13625
rno-miR-702-3p	circRNA_2241|Chr15:28155239_28192349_-	151	-32.3	151	-32.3	548837	23	37111	26673
rno-miR-702-3p	circRNA_2272|Chr15:39680680_39703475_-	165	-37.29	165	-37.29	548868	23	14031	2156
rno-miR-702-3p	circRNA_2524|Chr16:61986996_62026513_+	168	-33.85	168	-33.85	549120	23	36595	1237
rno-miR-3593-5p	circRNA_1743|Chr13:73219583_73255342_+	160	-31.75	160	-31.75	557491	22	20428	12005
rno-miR-3593-5p	circRNA_1744|Chr13:73219583_73265813_+	160	-31.75	160	-31.75	557492	22	20518	12005
rno-miR-3593-5p	circRNA_1806|Chr13:89336922_89423597_-	159	-30.06	159	-30.06	557554	22	80143	15401
rno-miR-3593-5p	circRNA_1898|Chr14:5437233_5452115_-	161	-31.73	161	-31.73	557646	22	14883	10582
rno-miR-3593-5p	circRNA_2096|Chr14:82260834_82265660_+	156	-30.66	156	-30.66	557844	22	873	301
rno-miR-3593-5p	circRNA_2246|Chr15:33610716_33637119_-	164	-31.72	164	-31.72	557994	22	25030	9172
rno-miR-3593-5p	circRNA_2247|Chr15:33616829_33642831_-	164	-31.72	164	-31.72	557995	22	20738	10993
rno-miR-3593-5p	circRNA_2248|Chr15:33617554_33645321_-	164	-31.72	164	-31.72	557996	22	20250	11230
rno-miR-3593-5p	circRNA_2249|Chr15:33623653_33651110_-	164	-31.72	164	-31.72	557997	22	15672	12751
rno-miR-3593-5p	circRNA_2340|Chr15:56885591_56913746_-	161	-30.93	161	-30.93	558088	22	28156	22108
rno-miR-3593-5p	circRNA_2424|Chr16:7268256_7273199_-	171	-33.2	171	-33.2	558172	22	859	144
rno-miR-3593-5p	circRNA_2425|Chr16:7272104_7273199_-	171	-33.2	171	-33.2	558173	22	249	144
rno-miR-3593-5p	circRNA_2451|Chr16:19726549_19747711_+	166	-32.42	166	-32.42	558199	22	3070	1041
rno-miR-3594-5p	circRNA_1737|Chr13:70678863_70703404_-	165	-30.72	165	-30.72	559149	21	2862	1600
rno-miR-3594-5p	circRNA_1806|Chr13:89336922_89423597_-	158	-30.23	158	-30.23	559218	21	80143	39322
rno-miR-3594-5p	circRNA_2013|Chr14:43400193_43430679_+	160	-30.3	160	-30.3	559425	21	21062	6131
rno-miR-3594-5p	circRNA_2014|Chr14:43400193_43461320_+	160	-30.3	160	-30.3	559426	21	21337	6131
rno-miR-3594-5p	circRNA_2252|Chr15:34308708_34310423_-	161	-30.97	161	-30.97	559664	21	819	68
rno-miR-3594-5p	circRNA_2311|Chr15:52195200_52202455_-	168	-30.37	168	-30.37	559723	21	923	113
rno-miR-3594-5p	circRNA_2340|Chr15:56885591_56913746_-	169	-30.52	169	-30.52	559752	21	28156	16567
rno-miR-3594-3p	circRNA_2125|Chr14:86689200_86694961_-	160	-31.02	160	-31.02	560369	22	309	231
rno-miR-3120	circRNA_2163|Chr14:107724856_107728893_-	173	-31.25	173	-31.25	561239	21	4038	3622
rno-miR-1199-5p	circRNA_1733|Chr13:69086856_69089260_+	151	-30.09	151	-30.09	564969	20	273	126
rno-miR-1199-5p	circRNA_2246|Chr15:33610716_33637119_-	164	-32.78	164	-32.78	565482	20	25030	13501
rno-miR-1199-5p	circRNA_2247|Chr15:33616829_33642831_-	164	-32.78	164	-32.78	565483	20	20738	15322
rno-miR-1199-5p	circRNA_2248|Chr15:33617554_33645321_-	164	-32.78	164	-32.78	565484	20	20250	15559
rno-miR-1199-3p	circRNA_2210|Chr15:12473282_12530308_-	174	-35.53	174	-35.53	566278	21	555	147
rno-miR-1199-3p	circRNA_2211|Chr15:12513465_12514085_-	174	-35.53	174	-35.53	566279	21	363	60
rno-miR-1306-5p	circRNA_2246|Chr15:33610716_33637119_-	322	-67.24	171	-36.36	573802	22	25030	5245 1365
rno-miR-1306-5p	circRNA_2247|Chr15:33616829_33642831_-	322	-67.24	171	-36.36	573803	22	20738	7066 3186
rno-miR-1306-5p	circRNA_2248|Chr15:33617554_33645321_-	322	-67.24	171	-36.36	573804	22	20250	7303 3423
rno-miR-1306-5p	circRNA_2249|Chr15:33623653_33651110_-	322	-67.24	171	-36.36	573805	22	15672	8824 4944
rno-miR-1306-5p	circRNA_2250|Chr15:33627696_33655263_-	322	-67.24	171	-36.36	573806	22	12862	10057 6177
rno-miR-3473	circRNA_1806|Chr13:89336922_89423597_-	360	-70.18	188	-39.92	575026	22	80143	67083 29812
rno-miR-3473	circRNA_2216|Chr15:16170084_16229620_+	200	-47.42	200	-47.42	575436	22	59537	7479
rno-miR-3473	circRNA_2496|Chr16:32457520_32480855_+	200	-47.42	200	-47.42	575716	22	23336	3943
rno-miR-3473	circRNA_2520|Chr16:54471413_54479512_-	162	-31.35	162	-31.35	575740	22	1070	191
rno-miR-6216	circRNA_2340|Chr15:56885591_56913746_-	176	-32.46	176	-32.46	578056	23	28156	15763
rno-miR-344i	circRNA_1920|Chr14:10792005_10800254_+	163	-33.37	163	-33.37	580132	22	5661	3179
rno-miR-6315	circRNA_1743|Chr13:73219583_73255342_+	172	-32.38	172	-32.38	580787	23	20428	12414
rno-miR-6315	circRNA_1744|Chr13:73219583_73265813_+	172	-32.38	172	-32.38	580788	23	20518	12414
rno-miR-6315	circRNA_1900|Chr14:5870915_5943886_+	164	-39.41	164	-39.41	580944	23	72972	55390
rno-miR-6315	circRNA_1901|Chr14:5871986_5944415_+	164	-39.41	164	-39.41	580945	23	72430	54319
rno-miR-6315	circRNA_1997|Chr14:41901823_41945264_-	165	-30.84	165	-30.84	581041	23	43442	39826
rno-miR-6315	circRNA_2011|Chr14:42939572_42956092_-	170	-33.04	170	-33.04	581055	23	16521	14198
rno-miR-6315	circRNA_2216|Chr15:16170084_16229620_+	315	-65.63	159	-35.6	581260	23	59537	19844 57068
rno-miR-3102	circRNA_2067|Chr14:72468750_72507979_+	155	-31.79	155	-31.79	581943	21	39230	4864
rno-miR-344g	circRNA_1920|Chr14:10792005_10800254_+	166	-31.37	166	-31.37	582628	22	5661	2848
rno-miR-344g	circRNA_2198|Chr15:3465242_3470194_-	167	-32.4	167	-32.4	582906	22	723	479
rno-miR-344g	circRNA_2229|Chr15:23792824_23801848_+	170	-33.75	170	-33.75	582937	22	9025	3151
rno-miR-6316	circRNA_1821|Chr13:95193009_95276450_-	163	-30.11	163	-30.11	583361	23	46193	43492
rno-miR-6318	circRNA_1809|Chr13:90807808_90809452_-	151	-31.45	151	-31.45	585013	22	653	585
rno-miR-6318	circRNA_1899|Chr14:5555533_5630332_-	161	-31.2	161	-31.2	585103	22	18054	17972
rno-miR-6318	circRNA_1903|Chr14:6026321_6082793_+	161	-31.67	161	-31.67	585107	22	43599	32826
rno-miR-6318	circRNA_2107|Chr14:84288820_84316036_+	161	-31.64	161	-31.64	585311	22	18752	9016
rno-miR-6318	circRNA_2216|Chr15:16170084_16229620_+	172	-35.38	172	-35.38	585420	22	59537	11294
rno-miR-6318	circRNA_2340|Chr15:56885591_56913746_-	154	-32.02	154	-32.02	585544	22	28156	22110
rno-miR-3075	circRNA_2096|Chr14:82260834_82265660_+	164	-33.58	164	-33.58	586964	24	873	48
rno-miR-3075	circRNA_2382|Chr15:103811332_103819328_-	175	-33.05	175	-33.05	587250	24	728	635
rno-miR-6323	circRNA_2213|Chr15:13212908_13228603_-	178	-30.76	178	-30.76	591241	25	329	237
rno-miR-6323	circRNA_2214|Chr15:13212908_13287792_-	178	-30.76	178	-30.76	591242	25	59518	59426
rno-miR-6323	circRNA_2224|Chr15:20724961_20751380_-	174	-31.34	174	-31.34	591252	25	26420	5514
rno-miR-6323	circRNA_2464|Chr16:22715018_22741348_+	180	-32.46	180	-32.46	591492	25	18096	17466
rno-miR-6323	circRNA_2466|Chr16:22722576_22741348_+	180	-32.46	180	-32.46	591494	25	17516	16886
rno-miR-6326	circRNA_1815|Chr13:95012881_95030583_+	168	-33.3	168	-33.3	593339	23	17703	4046
rno-miR-6328	circRNA_2203|Chr15:4763405_4768066_+	166	-31.82	166	-31.82	595391	21	4662	1799
rno-miR-6328	circRNA_2210|Chr15:12473282_12530308_-	155	-31.33	155	-31.33	595398	21	555	285
rno-miR-6328	circRNA_2211|Chr15:12513465_12514085_-	155	-31.33	155	-31.33	595399	21	363	198
rno-miR-3072	circRNA_1903|Chr14:6026321_6082793_+	155	-33.37	155	-33.37	598419	23	43599	41797
rno-miR-3072	circRNA_2013|Chr14:43400193_43430679_+	166	-31.49	166	-31.49	598529	23	21062	5531
rno-miR-3072	circRNA_2014|Chr14:43400193_43461320_+	166	-31.49	166	-31.49	598530	23	21337	5531
rno-miR-3072	circRNA_2360|Chr15:69920858_69929672_-	155	-30.64	155	-30.64	598876	23	8815	1623
rno-miR-6333	circRNA_1903|Chr14:6026321_6082793_+	172	-30.6	172	-30.6	600915	23	43599	18502
rno-miR-6333	circRNA_2013|Chr14:43400193_43430679_+	178	-34.21	178	-34.21	601025	23	21062	12110
rno-miR-6333	circRNA_2014|Chr14:43400193_43461320_+	178	-34.21	178	-34.21	601026	23	21337	12110
rno-miR-6333	circRNA_2229|Chr15:23792824_23801848_+	172	-34.39	172	-34.39	601241	23	9025	8224
rno-miR-6334	circRNA_1743|Chr13:73219583_73255342_+	158	-35.99	158	-35.99	601587	22	20428	216
rno-miR-6334	circRNA_1744|Chr13:73219583_73265813_+	158	-35.99	158	-35.99	601588	22	20518	216
rno-miR-6334	circRNA_1806|Chr13:89336922_89423597_-	175	-35.71	175	-35.71	601650	22	80143	28248
rno-miR-6334	circRNA_2103|Chr14:83245280_83262412_+	168	-30.83	168	-30.83	601947	22	5105	4721
rno-miR-6334	circRNA_2173|Chr14:112869714_112923270_-	157	-32.36	157	-32.36	602017	22	53557	23298
rno-miR-6334	circRNA_2227|Chr15:23792824_23793336_+	150	-32.64	150	-32.64	602071	22	513	415
rno-miR-6334	circRNA_2228|Chr15:23792824_23793342_+	150	-32.64	150	-32.64	602072	22	519	415
rno-miR-6334	circRNA_2229|Chr15:23792824_23801848_+	150	-32.64	150	-32.64	602073	22	9025	415
rno-miR-6334	circRNA_2429|Chr16:7476990_7478191_-	162	-30.8	162	-30.8	602273	22	394	234
rno-miR-6334	circRNA_2446|Chr16:18716646_18717980_+	160	-34.11	160	-34.11	602290	22	394	278
rno-miR-7578	circRNA_1806|Chr13:89336922_89423597_-	161	-30.44	161	-30.44	602482	23	80143	13195
rno-miR-7578	circRNA_2013|Chr14:43400193_43430679_+	159	-30.29	159	-30.29	602689	23	21062	15243
rno-miR-7578	circRNA_2014|Chr14:43400193_43461320_+	159	-30.29	159	-30.29	602690	23	21337	15243
rno-miR-7578	circRNA_2090|Chr14:81689519_81713818_-	162	-30.74	162	-30.74	602766	23	1659	1066
rno-miR-1247-5p	circRNA_1903|Chr14:6026321_6082793_+	176	-40.86	176	-40.86	606739	22	43599	32502
rno-miR-1247-5p	circRNA_1994|Chr14:38413673_38421835_+	158	-35.21	158	-35.21	606830	22	444	285
rno-miR-1247-5p	circRNA_2229|Chr15:23792824_23801848_+	152	-36.08	152	-36.08	607065	22	9025	5144
rno-miR-1247-5p	circRNA_2474|Chr16:23555919_23624759_+	171	-37.55	171	-37.55	607310	22	25155	24134
rno-miR-149-5p	circRNA_1734|Chr13:69862463_69885420_+	163	-35.03	163	-35.03	610730	23	763	84
rno-miR-149-5p	circRNA_1926|Chr14:14129686_14131085_-	179	-31.03	179	-31.03	610922	23	1400	250
rno-miR-149-5p	circRNA_2107|Chr14:84288820_84316036_+	174	-30.97	174	-30.97	611103	23	18752	7954
rno-miR-149-5p	circRNA_2224|Chr15:20724961_20751380_-	174	-38.22	174	-38.22	611220	23	26420	18105
rno-miR-149-5p	circRNA_2246|Chr15:33610716_33637119_-	168	-36.84	168	-36.84	611242	23	25030	11005
rno-miR-149-5p	circRNA_2247|Chr15:33616829_33642831_-	168	-36.84	168	-36.84	611243	23	20738	12826
rno-miR-149-5p	circRNA_2248|Chr15:33617554_33645321_-	168	-36.84	168	-36.84	611244	23	20250	13063
rno-miR-149-5p	circRNA_2249|Chr15:33623653_33651110_-	168	-36.84	168	-36.84	611245	23	15672	14584
rno-miR-149-5p	circRNA_2250|Chr15:33627696_33655263_-	163	-30.56	163	-30.56	611246	23	12862	757
rno-miR-149-3p	circRNA_1755|Chr13:74445640_74450825_-	160	-38.14	160	-38.14	611583	18	1148	364
rno-miR-149-3p	circRNA_2214|Chr15:13212908_13287792_-	157	-31.07	157	-31.07	612042	18	59518	25222
rno-miR-1896	circRNA_2053|Chr14:69774150_69819258_+	167	-38.95	167	-38.95	616041	18	26358	20641
rno-miR-1956-5p	circRNA_2246|Chr15:33610716_33637119_-	171	-32.39	171	-32.39	618730	22	25030	22698
rno-miR-1956-5p	circRNA_2247|Chr15:33616829_33642831_-	171	-32.39	171	-32.39	618731	22	20738	973
rno-miR-1956-5p	circRNA_2248|Chr15:33617554_33645321_-	171	-32.39	171	-32.39	618732	22	20250	1210
rno-miR-1956-5p	circRNA_2249|Chr15:33623653_33651110_-	171	-32.39	171	-32.39	618733	22	15672	2731
rno-miR-1956-5p	circRNA_2250|Chr15:33627696_33655263_-	171	-32.39	171	-32.39	618734	22	12862	3964
rno-miR-1956-5p	circRNA_2524|Chr16:61986996_62026513_+	164	-32.52	164	-32.52	619008	22	36595	3082
rno-miR-3084a-3p	circRNA_2067|Chr14:72468750_72507979_+	170	-31.23	170	-31.23	622711	22	39230	24254
rno-miR-3084a-3p	circRNA_2068|Chr14:72473810_72507979_+	170	-31.23	170	-31.23	622712	22	34170	19194
rno-miR-5132-5p	circRNA_2216|Chr15:16170084_16229620_+	152	-35.24	152	-35.24	629516	22	59537	37075
rno-miR-5132-5p	circRNA_2224|Chr15:20724961_20751380_-	165	-30.15	165	-30.15	629524	22	26420	19966
rno-miR-5132-5p	circRNA_2241|Chr15:28155239_28192349_-	157	-35.53	157	-35.53	629541	22	37111	33127
rno-miR-5132-5p	circRNA_2496|Chr16:32457520_32480855_+	159	-30.5	159	-30.5	629796	22	23336	13823
rno-miR-486	circRNA_1899|Chr14:5555533_5630332_-	164	-30.38	164	-30.38	634191	22	18054	4991
rno-miR-486	circRNA_1903|Chr14:6026321_6082793_+	164	-30.38	164	-30.38	634195	22	43599	26531
rno-miR-709	circRNA_1751|Chr13:73708986_73713123_+	177	-31.54	177	-31.54	634875	19	4138	586
rno-miR-709	circRNA_1806|Chr13:89336922_89423597_-	330	-62.68	168	-31.59	634930	19	80143	60983 68252
rno-miR-709	circRNA_1873|Chr13:113735261_113748416_+	169	-32.52	169	-32.52	634997	19	13156	1221
rno-miR-709	circRNA_1900|Chr14:5870915_5943886_+	177	-34.42	177	-34.42	635024	19	72972	62120
rno-miR-709	circRNA_1901|Chr14:5871986_5944415_+	177	-34.42	177	-34.42	635025	19	72430	61049
rno-miR-709	circRNA_1920|Chr14:10792005_10800254_+	346	-69.74	177	-37.81	635044	19	5661	483 5186
rno-miR-709	circRNA_2067|Chr14:72468750_72507979_+	171	-31.47	171	-31.47	635191	19	39230	26860
rno-miR-709	circRNA_2068|Chr14:72473810_72507979_+	171	-31.47	171	-31.47	635192	19	34170	21800
rno-miR-709	circRNA_2107|Chr14:84288820_84316036_+	177	-34.73	177	-34.73	635231	19	18752	15814
rno-miR-709	circRNA_2214|Chr15:13212908_13287792_-	170	-33.29	170	-33.29	635338	19	59518	41145
rno-miR-709	circRNA_2340|Chr15:56885591_56913746_-	166	-32.53	166	-32.53	635464	19	28156	17522
rno-miR-709	circRNA_2524|Chr16:61986996_62026513_+	9576	-1966.27	171	-35.16	635648	19	36595	2129 2143 2155 2167 2179 2191 2203 2215 2227 2239 2251 2263 2275 2287 2299 2311 2323 2335 2347 2359 2371 2383 2395 2407 2419 2431 2443 2455 2467 2479 2491 2503 2515 2527 2539 2551 2563 2575 2587 2599 2611 2623 2635 2647 2659 2671 2683 2695 2707 2719 2731 2743 2755 2767 2779 2791
rno-miR-322-5p	circRNA_2725|Chr17:58006111_58031197_+	167	-30.86	167	-30.86	201	22	1008	744
rno-miR-322-5p	circRNA_2727|Chr17:58010759_58029779_+	167	-30.86	167	-30.86	203	22	688	566
rno-miR-322-5p	circRNA_2728|Chr17:58010759_58031197_+	167	-30.86	167	-30.86	204	22	830	566
rno-miR-322-5p	circRNA_2730|Chr17:58017029_58031197_+	167	-30.86	167	-30.86	206	22	668	404
rno-miR-322-5p	circRNA_2747|Chr17:75295083_75352500_+	166	-32.58	166	-32.58	223	22	57418	516
rno-miR-322-5p	circRNA_2748|Chr17:75295083_75392493_+	166	-32.58	166	-32.58	224	22	97411	516
rno-miR-322-5p	circRNA_3141|Chr19:24856828_24860320_-	162	-30.05	162	-30.05	617	22	701	531
rno-miR-323-5p	circRNA_2565|Chr16:83563772_83585327_+	162	-30.01	162	-30.01	1733	22	150	118
rno-miR-323-5p	circRNA_2566|Chr16:83585238_83586349_+	162	-30.01	162	-30.01	1734	22	243	58
rno-miR-323-5p	circRNA_2567|Chr16:83585238_83589233_+	162	-30.01	162	-30.01	1735	22	507	58
rno-miR-323-3p	circRNA_2748|Chr17:75295083_75392493_+	177	-30.23	177	-30.23	2762	21	97411	78762
rno-miR-324-5p	circRNA_3110|Chr19:15108217_15207439_+	159	-32.49	159	-32.49	5662	23	82148	705
rno-miR-324-3p	circRNA_2532|Chr16:70699699_70705130_-	169	-32.45	169	-32.45	5930	22	326	74
rno-miR-324-3p	circRNA_2573|Chr17:255722_327285_-	352	-77.24	176	-38.62	5971	22	70127	27414 27756
rno-miR-324-3p	circRNA_2639|Chr17:16124900_16153210_+	153	-30.17	153	-30.17	6037	22	938	901
rno-miR-324-3p	circRNA_2693|Chr17:37947498_37970247_+	157	-31.28	157	-31.28	6091	22	22750	4743
rno-miR-324-3p	circRNA_2869|Chr18:2005294_2094854_+	164	-30.06	164	-30.06	6267	22	2823	2462
rno-miR-324-3p	circRNA_2897|Chr18:15480332_15487339_+	480	-92.34	160	-30.78	6295	22	7008	2323 2533 2635
rno-miR-324-3p	circRNA_2898|Chr18:15480332_15490831_+	480	-92.34	160	-30.78	6296	22	10500	2323 2533 2635
rno-miR-324-3p	circRNA_3030|Chr18:61127055_61133821_+	162	-30.6	162	-30.6	6428	22	526	437
rno-miR-324-3p	circRNA_3080|Chr18:77477060_77494780_-	150	-31.68	150	-31.68	6478	22	5532	2858
rno-miR-324-3p	circRNA_3108|Chr19:12796717_12832860_-	166	-35.73	166	-35.73	6506	22	36144	32515
rno-miR-324-3p	circRNA_3110|Chr19:15108217_15207439_+	325	-68.92	168	-37.53	6508	22	82148	72684 21878
rno-miR-324-3p	circRNA_3235|Chr19:43899905_43908769_-	166	-34.57	166	-34.57	6633	22	7179	631
rno-miR-324-3p	circRNA_3318|Chr2:20488617_20555751_+	176	-38.62	176	-38.62	6716	22	24609	14446
rno-miR-326-5p	circRNA_2617|Chr17:9602248_9614622_+	162	-33.3	162	-33.3	8553	20	787	460
rno-miR-326-5p	circRNA_2618|Chr17:9611269_9614622_+	162	-33.3	162	-33.3	8554	20	863	536
rno-miR-326-5p	circRNA_2619|Chr17:9613030_9614622_+	162	-33.3	162	-33.3	8555	20	620	293
rno-miR-326-5p	circRNA_3230|Chr19:43265984_43294685_+	169	-30.24	169	-30.24	9166	20	24892	22931
rno-miR-326-3p	circRNA_2678|Chr17:29730437_29779048_-	171	-31.86	171	-31.86	9460	21	22176	21108
rno-miR-326-3p	circRNA_2679|Chr17:29730437_29803985_-	171	-31.86	171	-31.86	9461	21	47113	46045
rno-miR-326-3p	circRNA_2722|Chr17:55367271_55409395_-	170	-35.34	170	-35.34	9504	21	35457	16244
rno-miR-326-3p	circRNA_2984|Chr18:46003662_46021968_+	158	-30.35	158	-30.35	9766	21	18307	4325
rno-miR-326-3p	circRNA_3108|Chr19:12796717_12832860_-	156	-32.23	156	-32.23	9890	21	36144	24273
rno-miR-328a-5p	circRNA_2617|Chr17:9602248_9614622_+	151	-31.04	151	-31.04	12783	19	787	457
rno-miR-328a-5p	circRNA_2618|Chr17:9611269_9614622_+	151	-31.04	151	-31.04	12784	19	863	533
rno-miR-328a-5p	circRNA_2619|Chr17:9613030_9614622_+	151	-31.04	151	-31.04	12785	19	620	290
rno-miR-328a-5p	circRNA_2641|Chr17:16160183_16162335_+	159	-30.85	159	-30.85	12807	19	316	214
rno-miR-328a-5p	circRNA_2642|Chr17:16160183_16165056_+	159	-30.85	159	-30.85	12808	19	491	214
rno-miR-328a-5p	circRNA_2691|Chr17:37764142_37793965_+	326	-64.01	164	-32.02	12857	19	29824	24099 11651
rno-miR-328a-5p	circRNA_2693|Chr17:37947498_37970247_+	158	-30.21	158	-30.21	12859	19	22750	4154
rno-miR-328a-5p	circRNA_2722|Chr17:55367271_55409395_-	164	-31.03	164	-31.03	12888	19	35457	2924
rno-miR-328a-5p	circRNA_2897|Chr18:15480332_15487339_+	154	-31.89	154	-31.89	13063	19	7008	4769
rno-miR-328a-5p	circRNA_2898|Chr18:15480332_15490831_+	154	-31.89	154	-31.89	13064	19	10500	4769
rno-miR-328a-5p	circRNA_2961|Chr18:32548750_32554731_-	162	-33.95	162	-33.95	13127	19	5982	5638
rno-miR-328a-5p	circRNA_2987|Chr18:48443339_48443646_+	160	-32.02	160	-32.02	13153	19	308	242
rno-miR-328a-5p	circRNA_2988|Chr18:48443339_48508708_+	160	-32.02	160	-32.02	13154	19	561	242
rno-miR-328a-5p	circRNA_2989|Chr18:48443339_48521166_+	160	-32.02	160	-32.02	13155	19	907	242
rno-miR-328a-5p	circRNA_2990|Chr18:48443339_48531023_+	160	-32.02	160	-32.02	13156	19	1084	242
rno-miR-328a-5p	circRNA_2998|Chr18:49891333_49906496_-	167	-33.41	167	-33.41	13164	19	15164	9779
rno-miR-328a-5p	circRNA_2999|Chr18:49891333_49906500_-	167	-33.41	167	-33.41	13165	19	15168	9783
rno-miR-328a-5p	circRNA_3108|Chr19:12796717_12832860_-	162	-30.75	162	-30.75	13274	19	36144	2152
rno-miR-328a-5p	circRNA_3148|Chr19:25861153_25886887_-	335	-67.21	168	-35.4	13314	19	25735	21590 694
rno-miR-328a-5p	circRNA_3149|Chr19:25866615_25886887_-	167	-31.81	167	-31.81	13315	19	20273	694
rno-miR-328a-5p	circRNA_3220|Chr19:42856166_42920390_-	160	-32.67	160	-32.67	13386	19	3491	2403
rno-miR-328a-5p	circRNA_3221|Chr19:42911935_42920390_-	160	-32.67	160	-32.67	13387	19	3259	2403
rno-miR-328a-5p	circRNA_3222|Chr19:42917629_42920390_-	160	-32.67	160	-32.67	13388	19	2762	2403
rno-miR-328a-5p	circRNA_3286|Chr2:3643243_3662823_+	163	-30.55	163	-30.55	13452	19	19581	5176
rno-miR-328a-5p	circRNA_3351|Chr2:27189437_27222115_+	159	-32.72	159	-32.72	13517	19	11211	8476
rno-miR-328a-3p	circRNA_2567|Chr16:83585238_83589233_+	173	-31.81	173	-31.81	13579	22	507	237
rno-miR-328a-3p	circRNA_2679|Chr17:29730437_29803985_-	164	-30.79	164	-30.79	13691	22	47113	17512
rno-miR-328a-3p	circRNA_2836|Chr17:87758882_87771508_-	160	-30.08	160	-30.08	13848	22	2151	50
rno-miR-328a-3p	circRNA_3006|Chr18:55977323_55978235_-	162	-32.89	162	-32.89	14018	22	913	226
rno-miR-328a-3p	circRNA_3341|Chr2:25770099_25777403_-	154	-32.95	154	-32.95	14353	22	868	436
rno-miR-328a-3p	circRNA_3353|Chr2:27713879_27755196_+	160	-31.81	160	-31.81	14365	22	25608	1125
rno-miR-328a-3p	circRNA_3354|Chr2:27713879_27755789_+	160	-31.81	160	-31.81	14366	22	26201	1125
[truncated: 4,064 more rows]
